# Supplementary material for: MetaGeniE: Characterizing Human Clinical Samples Using Deep Metagenomic Sequencing
Source: PLoS One. 2014 Nov 3;9(11):e110915. doi: 10.1371/journal.pone.0110915 (PMC4218713; doi:10.1371/journal.pone.0110915)
Supplement: Figure S4 — Distribution of microbial community across the four cystic fibrosis samples. (DOCX) [file pone.0110915.s004.docx]

**MetaGeniE: Characterizing Human Clinical Samples Using Deep Metagenomic Sequencing**

Arun Rawat1*, David M. Engelthaler1, Elizabeth M. Driebe1, Paul Keim1,2, Jeffrey T. Foster2,3*

1Pathogen Genomics Division, Translational Genomics Research Institute, Flagstaff, Arizona, United States of America

2Center for Microbial Genetics and Genomics, Northern Arizona University, Flagstaff, Arizona, United States of America

3Department of Molecular, Cellular, and Biomedical Sciences, University of New Hampshire, Durham, New Hampshire, United States of America


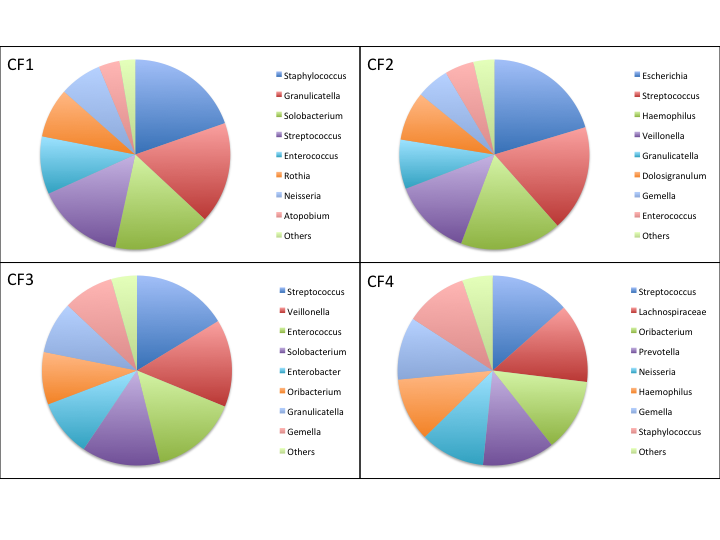


**Figure S4.** Distribution of microbial community across the four cystic fibrosis samples (Top Hit per Genus is represented; Minimum genome coverage percent >10%, Genome Size >100,000; Scaffolds do not represent whole genomes and might be overrepresented).
