# Supplementary material for: MetaGeniE: Characterizing Human Clinical Samples Using Deep Metagenomic Sequencing
Source: PLoS One. 2014 Nov 3;9(11):e110915. doi: 10.1371/journal.pone.0110915 (PMC4218713; doi:10.1371/journal.pone.0110915)
Supplement: Table S5 — Detection of close relative in single infection library consisting of Staphylococcus aureus TCH1516. (XLSX) [file pone.0110915.s011.xlsx]

## Sheet: 100
Organism	Genome_Coverage(%)	Genome_Not_Covered(%)	Genome_Coverage	Genome_Not_Covered	Genome_Size
Staphylococcus_#_aureus_!_subsp._{_aureus_}_USA300_TCH1516_chromosome_complete_genome|gi|161508266|ref|NC_010079.1|	0.352	99.648	10103	2862812	2872915
Staphylococcus_#_aureus_!_subsp._{_aureus_}_USA300_FPR3757_chromosome_complete_genome|gi|87159884|ref|NC_007793.1|	0.348	99.652	10003	2862766	2872769
Staphylococcus_#_aureus_!_M1_{_complete_}_genome|gi|479328021|ref|NC_021059.1|	0.339	99.661	9702	2854423	2864125
Staphylococcus_#_aureus_!_subsp._{_aureus_}_COL_chromosome_complete_genome|gi|57650036|ref|NC_002951.2|	0.342	99.658	9602	2799820	2809422
Staphylococcus_#_aureus_!_subsp._{_aureus_}_str._Newman_chromosome_complete_genome|gi|151220212|ref|NC_009641.1|	0.334	99.666	9602	2869295	2878897
Staphylococcus_#_aureus_!_subsp._{_aureus_}_NCTC_8325_chromosome_complete_genome|gi|88193823|ref|NC_007795.1|	0.333	99.667	9402	2811959	2821361
Staphylococcus_#_aureus_!_subsp._{_aureus_}_ED98_complete_genome|gi|269201690|ref|NC_013450.1|	0.333	99.667	9401	2815003	2824404
Staphylococcus_#_aureus_!_subsp._{_aureus_}_JH9_chromosome_complete_genome|gi|148266447|ref|NC_009487.1|	0.323	99.677	9401	2897299	2906700
Staphylococcus_#_aureus_!_subsp._{_aureus_}_VC40_chromosome_complete_genome|gi|379013365|ref|NC_016912.1|	0.345	99.655	9302	2683268	2692570
Staphylococcus_#_aureus_!_subsp._{_aureus_}_N315_chromosome_complete_genome|gi|29165615|ref|NC_002745.2|	0.33	99.67	9301	2805515	2814816
Staphylococcus_#_aureus_!_subsp._{_aureus_}_ST228_complete_genome_isolate_10388|gi|470190315|ref|NC_020529.1|	0.333	99.667	9201	2750309	2759510
Staphylococcus_#_aureus_!_subsp._{_aureus_}_ST228_complete_genome_isolate_10497|gi|470217946|ref|NC_020564.1|	0.333	99.667	9201	2750311	2759512
Staphylococcus_#_aureus_!_subsp._{_aureus_}_ST228_complete_genome_isolate_15532|gi|470192280|ref|NC_020532.1|	0.333	99.667	9201	2750682	2759883
Staphylococcus_#_aureus_!_subsp._{_aureus_}_ST228_complete_genome_isolate_16035|gi|470194245|ref|NC_020533.1|	0.333	99.667	9201	2750634	2759835
Staphylococcus_#_aureus_!_subsp._{_aureus_}_ST228_complete_genome_isolate_16125|gi|470221770|ref|NC_020566.1|	0.333	99.667	9201	2750256	2759457
Staphylococcus_#_aureus_!_subsp._{_aureus_}_ST228_complete_genome_isolate_18341|gi|470196211|ref|NC_020536.1|	0.333	99.667	9201	2750272	2759473
Staphylococcus_#_aureus_!_subsp._{_aureus_}_ST228_complete_genome_isolate_18412|gi|470198176|ref|NC_020537.1|	0.333	99.667	9201	2750062	2759263
Staphylococcus_#_aureus_!_subsp._{_aureus_}_ST228_complete_genome_isolate_18583|gi|470223734|ref|NC_020568.1|	0.333	99.667	9201	2750127	2759328
Staphylococcus_#_aureus_!_subsp._{_aureus_}_MW2_complete_genome|gi|21281729|ref|NC_003923.1|	0.319	99.681	9002	2811460	2820462
Staphylococcus_#_aureus_!_Bmb9393_{_complete_}_genome|gi|521210823|ref|NC_021670.1|	0.299	99.701	8902	2971646	2980548
Staphylococcus_#_aureus_!_subsp._{_aureus_}_T0131_chromosome_complete_genome|gi|384868588|ref|NC_017347.1|	0.302	99.698	8802	2905098	2913900
Staphylococcus_#_aureus_!_subsp._{_aureus_}_TW20_complete_genome|gi|387141638|ref|NC_017331.1|	0.289	99.711	8802	3034408	3043210
Staphylococcus_#_aureus_!_M0235_{_genomic_}_scaffold_acumc-supercont1.1_whole_genome_shotgun_sequence|gi|487361831|ref|NZ_KB821130.1|	0.311	99.689	8801	2818275	2827076
Staphylococcus_#_aureus_!_subsp._{_aureus_}_11819-97_chromosome_complete_genome|gi|385780298|ref|NC_017351.1|	0.309	99.691	8801	2837745	2846546
Staphylococcus_#_aureus_!_subsp._{_aureus_}_str._JKD6008_chromosome_complete_genome|gi|384860682|ref|NC_017341.1|	0.298	99.702	8702	2915642	2924344
Staphylococcus_#_aureus_!_subsp._{_aureus_}_Mu50_chromosome_complete_genome|gi|57634611|ref|NC_002758.2|	0.302	99.698	8701	2869828	2878529
Staphylococcus_#_aureus_!_subsp._{_aureus_}_Mu3_complete_genome|gi|156978331|ref|NC_009782.1|	0.299	99.701	8601	2871567	2880168
Staphylococcus_#_aureus_!_subsp._{_aureus_}_MSSA476_chromosome_complete_genome|gi|49484912|ref|NC_002953.3|	0.3	99.7	8402	2791400	2799802
Staphylococcus_#_aureus_!_subsp._{_aureus_}_ECT-R_2_complete_genome|gi|384863396|ref|NC_017343.1|	0.308	99.692	8401	2721139	2729540
Staphylococcus_#_aureus_!_subsp._{_aureus_}_JH1_chromosome_complete_genome|gi|150392480|ref|NC_009632.1|	0.289	99.711	8401	2898106	2906507
Staphylococcus_#_aureus_!_M1216_{_genomic_}_scaffold_acumJ-supercont-complete_whole_genome_shotgun_sequence|gi|493203888|ref|NZ_KB822075.1|	0.297	99.703	8302	2785073	2793375
Staphylococcus_#_aureus_!_04-02981_{_chromosome_}_complete_genome|gi|387149188|ref|NC_017340.1|	0.291	99.709	8201	2813251	2821452
Staphylococcus_#_aureus_!_CA-347_{_complete_}_genome|gi|514064966|ref|NC_021554.1|	0.267	99.733	7602	2842901	2850503
Staphylococcus_#_aureus_!_08BA02176_{_chromosome_}_complete_genome|gi|404477334|ref|NC_018608.1|	0.27	99.73	7502	2774811	2782313
Staphylococcus_#_aureus_!_subsp._{_aureus_}_HO_5096_0412_complete_genome|gi|386829725|ref|NC_017763.1|	0.254	99.746	7202	2825097	2832299
Staphylococcus_#_aureus_!_subsp._{_aureus_}_MRSA252_chromosome_complete_genome|gi|49482253|ref|NC_002952.2|	0.238	99.762	6902	2895717	2902619
Staphylococcus_#_aureus_!_subsp._{_aureus_}_LGA251_complete_genome|gi|387779217|ref|NC_017349.1|	0.24	99.76	6602	2744232	2750834
Staphylococcus_#_aureus_!_subsp._{_aureus_}_TCH60_chromosome_complete_genome|gi|384865886|ref|NC_017342.1|	0.225	99.775	6302	2796373	2802675
Staphylococcus_#_aureus_!_subsp._{_aureus_}_ED133_chromosome_complete_genome|gi|384546269|ref|NC_017337.1|	0.222	99.778	6301	2826177	2832478
Staphylococcus_#_aureus_!_subsp._{_aureus_}_JKD6159_chromosome_complete_genome|gi|384548923|ref|NC_017338.1|	0.221	99.779	6201	2805234	2811435
Staphylococcus_#_aureus_!_subsp._{_aureus_}_ST398_complete_genome|gi|387601291|ref|NC_017333.1|	0.216	99.784	6201	2866381	2872582
Staphylococcus_#_aureus_!_subsp._{_aureus_}_M013_chromosome_complete_genome|gi|379019812|ref|NC_016928.1|	0.212	99.788	5902	2782734	2788636
Staphylococcus_#_aureus_!_subsp._{_aureus_}_71193_chromosome_complete_genome|gi|386727822|ref|NC_017673.1|	0.217	99.783	5901	2709099	2715000
Staphylococcus_#_aureus_!_RF122_{_complete_}_genome|gi|82749777|ref|NC_007622.1|	0.212	99.788	5801	2736730	2742531
Staphylococcus_#_aureus_!_M0580_{_genomic_}_scaffold_acvrg-supercont1.2_whole_genome_shotgun_sequence|gi|486357261|ref|NZ_KB821487.1|	0.299	99.701	4401	1466782	1471183
Staphylococcus_#_aureus_!_M1188_{_genomic_}_scaffold_acumb-supercont1.4_whole_genome_shotgun_sequence|gi|493198238|ref|NZ_KB822060.1|	0.333	99.667	4101	1227618	1231719
Staphylococcus_#_aureus_!_M0173_{_genomic_}_scaffold_acrHj-supercont1.2_whole_genome_shotgun_sequence|gi|486253586|ref|NZ_KB821071.1|	0.376	99.624	4000	1059667	1063667
Staphylococcus_#_aureus_!_M0326_{_genomic_}_scaffold_acrHf-supercont1.2_whole_genome_shotgun_sequence|gi|486268272|ref|NZ_KB821203.1|	0.302	99.698	3700	1221639	1225339
Staphylococcus_#_aureus_!_M1188_{_genomic_}_scaffold_acumb-supercont1.2_whole_genome_shotgun_sequence|gi|493196425|ref|NZ_KB822058.1|	0.304	99.696	3700	1212357	1216057
Staphylococcus_#_aureus_!_M1373_{_genomic_}_scaffold_acumD-supercont1.4_whole_genome_shotgun_sequence|gi|488719292|ref|NZ_KB822213.1|	0.306	99.694	3700	1207210	1210910
Staphylococcus_#_aureus_!_M0998_{_genomic_}_scaffold_acvqv-supercont1.6_whole_genome_shotgun_sequence|gi|486398674|ref|NZ_KB821818.1|	0.325	99.675	3501	1073832	1077333
Staphylococcus_#_aureus_!_HI010_{_genomic_}_scaffold_acqxi-supercont1.1_whole_genome_shotgun_sequence|gi|486203361|ref|NZ_KB820894.1|	0.118	99.882	3402	2868960	2872362
Staphylococcus_#_aureus_!_M0450_{_genomic_}_scaffold_acqwq-supercont1.3_whole_genome_shotgun_sequence|gi|486302842|ref|NZ_KB821345.1|	0.303	99.697	3400	1117463	1120863
Staphylococcus_#_aureus_!_HI049B_{_genomic_}_scaffold_acqxg-supercont1.1_whole_genome_shotgun_sequence|gi|486205205|ref|NZ_KB820906.1|	0.114	99.886	3302	2886224	2889526
Staphylococcus_#_aureus_!_HI049C_{_genomic_}_scaffold_acqxH-supercont1.1_whole_genome_shotgun_sequence|gi|486211608|ref|NZ_KB820909.1|	0.114	99.886	3302	2886068	2889370
Staphylococcus_#_aureus_!_M0695_{_genomic_}_scaffold_acunx-supercont1.4_whole_genome_shotgun_sequence|gi|489045023|ref|NZ_KB821609.1|	0.348	99.652	3200	917365	920565
Staphylococcus_#_aureus_!_HI111_{_genomic_}_scaffold_acqwe-supercont1.1_whole_genome_shotgun_sequence|gi|486214133|ref|NZ_KB820916.1|	0.106	99.894	3001	2829525	2832526
Staphylococcus_#_aureus_!_HI022_{_genomic_}_scaffold_acqwY-supercont1.1_whole_genome_shotgun_sequence|gi|486209995|ref|NZ_KB820903.1|	0.103	99.897	2901	2815968	2818869
Staphylococcus_#_aureus_!_M0531_{_genomic_}_scaffold_acvqQ-supercont1.1_whole_genome_shotgun_sequence|gi|486342614|ref|NZ_KB821438.1|	0.102	99.898	2901	2838373	2841274
Staphylococcus_#_aureus_!_M0823_{_genomic_}_scaffold_acvqk-supercont1.8_whole_genome_shotgun_sequence|gi|486383952|ref|NZ_KB821698.1|	0.323	99.677	2901	894916	897817
Staphylococcus_#_aureus_!_subsp._{_aureus_}_55/2053_genomic_scaffold_supercont1.1_whole_genome_shotgun_sequence|gi|257423656|ref|NZ_GG700533.1|	0.283	99.717	2901	1023925	1026826
Staphylococcus_#_aureus_!_M0695_{_genomic_}_scaffold_acunx-supercont1.18_whole_genome_shotgun_sequence|gi|489044982|ref|NZ_KB821605.1|	0.351	99.649	2801	795780	798581
Staphylococcus_#_aureus_!_M0769_{_genomic_}_scaffold_acvqF-supercont1.7_whole_genome_shotgun_sequence|gi|480448432|ref|NZ_KB821635.1|	0.305	99.695	2801	915573	918374
Staphylococcus_#_aureus_!_M0055_{_genomic_}_scaffold_acumI-supercont1.1_whole_genome_shotgun_sequence|gi|487290252|ref|NZ_KB820976.1|	0.092	99.908	2701	2924138	2926839
Staphylococcus_#_aureus_!_M1286_{_genomic_}_scaffold_acuob-supercont1.10_whole_genome_shotgun_sequence|gi|487397932|ref|NZ_KB822142.1|	0.342	99.658	2701	787603	790304
Staphylococcus_#_aureus_!_M0312_{_genomic_}_scaffold_acqxO-supercont1.1_whole_genome_shotgun_sequence|gi|487376936|ref|NZ_KB821215.1|	0.088	99.912	2601	2941134	2943735
Staphylococcus_#_aureus_!_M0831_{_genomic_}_scaffold_acumY-supercont-complete_whole_genome_shotgun_sequence|gi|487384247|ref|NZ_KB821688.1|	0.088	99.912	2601	2955180	2957781
Staphylococcus_#_aureus_!_M0468_{_genomic_}_scaffold_acqxk-supercont1.2_whole_genome_shotgun_sequence|gi|486310012|ref|NZ_KB821359.1|	0.088	99.912	2600	2941580	2944180
Staphylococcus_#_aureus_!_HIF003_B2N-C_{_genomic_}_scaffold_acqxV-supercont1.1_whole_genome_shotgun_sequence|gi|486209139|ref|NZ_KB820925.1|	0.091	99.909	2501	2752495	2754996
Staphylococcus_#_aureus_!_M0221_{_genomic_}_scaffold_acqxa-supercont1.2_whole_genome_shotgun_sequence|gi|486259720|ref|NZ_KB821124.1|	0.087	99.913	2501	2869618	2872119
Staphylococcus_#_aureus_!_subsp._{_aureus_}_ATCC_BAA-39_genomic_scaffold_SCAFFOLD1_whole_genome_shotgun_sequence|gi|305431397|ref|NZ_GL397103.1|	0.079	99.921	2301	2897811	2900112
Staphylococcus_#_aureus_!_M0340_{_genomic_}_scaffold_acqxN-supercont1.2_whole_genome_shotgun_sequence|gi|486280931|ref|NZ_KB821242.1|	0.081	99.919	2201	2730736	2732937
Staphylococcus_#_aureus_!_HI168_{_genomic_}_scaffold_acqxp-supercont1.3_whole_genome_shotgun_sequence|gi|486213000|ref|NZ_KB820921.1|	0.119	99.881	2101	1760958	1763059
Staphylococcus_#_aureus_!_M1462_{_genomic_}_scaffold_acumH-supercont1.3_whole_genome_shotgun_sequence|gi|487135576|ref|NZ_KB822552.1|	0.087	99.913	2101	2409464	2411565
Staphylococcus_#_aureus_!_HI049_{_genomic_}_scaffold_acqxW-supercont1.1_whole_genome_shotgun_sequence|gi|486200690|ref|NZ_KB820912.1|	0.115	99.885	2001	1732277	1734278
Staphylococcus_#_aureus_!_M1015_{_genomic_}_scaffold_acvqH-supercont1.4_whole_genome_shotgun_sequence|gi|486404434|ref|NZ_KB821837.1|	0.32	99.68	1900	591300	593200
Staphylococcus_#_aureus_!_HI013_{_genomic_}_scaffold_acqwl-supercont1.2_whole_genome_shotgun_sequence|gi|486215615|ref|NZ_KB820899.1|	0.108	99.892	1801	1663122	1664923
Staphylococcus_#_aureus_!_M0602_{_genomic_}_scaffold_acvqp-supercont1.2_whole_genome_shotgun_sequence|gi|486358344|ref|NZ_KB821494.1|	0.318	99.682	1800	563658	565458
Staphylococcus_#_epidermidis_!_RP62A_{_complete_}_genome|gi|57865352|ref|NC_002976.3|	0.065	99.935	1701	2614829	2616530
Staphylococcus_#_aureus_!_M0239_{_genomic_}_scaffold_acqxh-supercont1.1_whole_genome_shotgun_sequence|gi|486264624|ref|NZ_KB821128.1|	0.062	99.938	1700	2724861	2726561
Staphylococcus_#_aureus_!_HI013_{_genomic_}_scaffold_acqwl-supercont1.1_whole_genome_shotgun_sequence|gi|486215046|ref|NZ_KB820898.1|	0.141	99.859	1601	1135760	1137361
Staphylococcus_#_aureus_!_M1007_{_genomic_}_scaffold_acvqZ-supercont1.3_whole_genome_shotgun_sequence|gi|486401503|ref|NZ_KB821831.1|	0.096	99.904	1601	1673839	1675440
Staphylococcus_#_aureus_!_M1223_{_genomic_}_scaffold_acune-supercont1.3_whole_genome_shotgun_sequence|gi|487396419|ref|NZ_KB822073.1|	0.096	99.904	1601	1665000	1666601
Staphylococcus_#_aureus_!_M0695_{_genomic_}_scaffold_acunx-supercont1.5_whole_genome_shotgun_sequence|gi|489045039|ref|NZ_KB821610.1|	0.28	99.72	1600	570645	572245
Staphylococcus_#_epidermidis_!_ATCC_{_12228_}_chromosome_complete_genome|gi|27466918|ref|NC_004461.1|	0.064	99.936	1600	2497679	2499279
Staphylococcus_#_aureus_!_HI049_{_genomic_}_scaffold_acqxW-supercont1.2_whole_genome_shotgun_sequence|gi|486202079|ref|NZ_KB820913.1|	0.123	99.877	1401	1135998	1137399
Staphylococcus_#_aureus_!_M0424_{_genomic_}_scaffold_acunn-supercont1.3_whole_genome_shotgun_sequence|gi|487368144|ref|NZ_KB821339.1|	0.093	99.907	1401	1501640	1503041
Staphylococcus_#_aureus_!_M0633_{_genomic_}_scaffold_acyCm-supercont1.2_whole_genome_shotgun_sequence|gi|487371925|ref|NZ_KB821508.1|	0.094	99.906	1401	1488923	1490324
Staphylococcus_#_aureus_!_HI168_{_genomic_}_scaffold_acqxp-supercont1.1_whole_genome_shotgun_sequence|gi|486212462|ref|NZ_KB820919.1|	0.119	99.881	1301	1094337	1095638
Staphylococcus_#_aureus_!_M1064_{_genomic_}_scaffold_acumU-supercont1.6_whole_genome_shotgun_sequence|gi|486420802|ref|NZ_KB821942.1|	0.087	99.913	1301	1496466	1497767
Staphylococcus_#_aureus_!_subsp._{_aureus_}_TCH70_genomic_scaffold_SCAFFOLD1_whole_genome_shotgun_sequence|gi|311744845|ref|NZ_GL538356.1|	0.047	99.953	1301	2785277	2786578
Staphylococcus_#_aureus_!_M1188_{_genomic_}_scaffold_acumb-supercont1.3_whole_genome_shotgun_sequence|gi|493196995|ref|NZ_KB822059.1|	0.317	99.683	1300	408277	409577
Staphylococcus_#_aureus_!_subsp._{_aureus_}_MN8_chromosome_whole_genome_shotgun_sequence|gi|298527634|ref|NZ_CM000952.1|	0.041	99.959	1201	2898387	2899588
Staphylococcus_#_aureus_!_M1373_{_genomic_}_scaffold_acumD-supercont1.5_whole_genome_shotgun_sequence|gi|488719293|ref|NZ_KB822214.1|	0.533	99.467	1200	224137	225337
Staphylococcus_#_aureus_!_M0513_{_genomic_}_scaffold_acumP-supercont-complete_whole_genome_shotgun_sequence|gi|487369849|ref|NZ_KB821413.1|	0.038	99.962	1101	2931749	2932850
Staphylococcus_#_aureus_!_M1228_{_genomic_}_scaffold_acunW-supercont1.2_whole_genome_shotgun_sequence|gi|487401372|ref|NZ_KB822377.1|	0.07	99.93	1101	1566910	1568011
Staphylococcus_#_aureus_!_M0396_{_genomic_}_scaffold_acunf-supercont1.4_whole_genome_shotgun_sequence|gi|487367492|ref|NZ_KB821299.1|	0.063	99.937	1001	1591270	1592271
Staphylococcus_#_aureus_!_subsp._{_aureus_}_LCT-SA112_Scaffold1_whole_genome_shotgun_sequence|gi|452721112|ref|NZ_JH691956.1|	0.036	99.964	1001	2758430	2759431
Staphylococcus_#_aureus_!_M1223_{_genomic_}_scaffold_acune-supercont1.1_whole_genome_shotgun_sequence|gi|487396341|ref|NZ_KB822071.1|	0.086	99.914	1000	1168437	1169437
Staphylococcus_#_aureus_!_subsp._{_aureus_}_ATCC_51811_genomic_scaffold_SCAFFOLD1_whole_genome_shotgun_sequence|gi|297210119|ref|NZ_GG774480.1|	0.064	99.936	901	1399404	1400305
Staphylococcus_#_aureus_!_M1007_{_genomic_}_scaffold_acvqZ-supercont1.1_whole_genome_shotgun_sequence|gi|486400527|ref|NZ_KB821829.1|	0.081	99.919	900	1109994	1110894
Staphylococcus_#_aureus_!_subsp._{_aureus_}_M809_genomic_scaffold_supercont1.8_whole_genome_shotgun_sequence|gi|293509340|ref|NZ_GG749306.1|	0.225	99.775	900	399526	400426
Staphylococcus_#_aureus_!_subsp._{_aureus_}_MRSA131_genomic_scaffold_Scfld83_whole_genome_shotgun_sequence|gi|422745409|ref|NZ_GL638175.1|	0.164	99.836	801	487576	488377
Staphylococcus_#_aureus_!_M0177_{_genomic_}_scaffold_acumi-supercont1.1_whole_genome_shotgun_sequence|gi|487359982|ref|NZ_KB821078.1|	0.183	99.817	800	435591	436391
Staphylococcus_#_aureus_!_M0328_{_genomic_}_scaffold_acrGR-supercont1.1_whole_genome_shotgun_sequence|gi|486271607|ref|NZ_KB821211.1|	0.225	99.775	800	354052	354852
Staphylococcus_#_aureus_!_M0424_{_genomic_}_scaffold_acunn-supercont1.1_whole_genome_shotgun_sequence|gi|487367914|ref|NZ_KB821337.1|	0.072	99.928	800	1116205	1117005
Staphylococcus_#_aureus_!_subsp._{_aureus_}_MSHR1132_complete_genome|gi|379794527|ref|NC_016941.1|	0.025	99.975	700	2762085	2762785
Staphylococcus_#_aureus_!_M0695_{_genomic_}_scaffold_acunx-supercont1.1_whole_genome_shotgun_sequence|gi|489044929|ref|NZ_KB821596.1|	0.19	99.81	600	315868	316468
Staphylococcus_#_aureus_!_M1064_{_genomic_}_scaffold_acumU-supercont1.1_whole_genome_shotgun_sequence|gi|486419252|ref|NZ_KB821934.1|	0.067	99.933	600	900766	901366
Staphylococcus_#_aureus_!_M1373_{_genomic_}_scaffold_acumD-supercont1.7_whole_genome_shotgun_sequence|gi|488719319|ref|NZ_KB822216.1|	0.2	99.8	600	299348	299948
Staphylococcus_#_aureus_!_subsp._{_aureus_}_USA300_TCH959_genomic_scaffold_SCAFFOLD1_whole_genome_shotgun_sequence|gi|255926317|ref|NZ_GG697985.1|	0.043	99.957	600	1398186	1398786
Staphylococcus_#_aureus_!_M0408_{_genomic_}_scaffold_acrHk-supercont1.4_whole_genome_shotgun_sequence|gi|486296790|ref|NZ_KB821329.1|	0.045	99.955	501	1112003	1112504
Staphylococcus_#_aureus_!_M0877_{_genomic_}_scaffold_acumt-supercont1.5_whole_genome_shotgun_sequence|gi|487385357|ref|NZ_KB821718.1|	0.036	99.964	501	1389060	1389561
Staphylococcus_#_aureus_!_M0946_{_genomic_}_scaffold_acunJ-supercont1.6_whole_genome_shotgun_sequence|gi|487388144|ref|NZ_KB821791.1|	0.063	99.937	501	795845	796346
Staphylococcus_#_aureus_!_M1034_{_genomic_}_scaffold_acumn-supercont1.7_whole_genome_shotgun_sequence|gi|487391726|ref|NZ_KB821858.1|	0.057	99.943	501	877838	878339
Staphylococcus_#_aureus_!_subsp._{_aureus_}_EMRSA16_genomic_scaffold_supercont1.10_whole_genome_shotgun_sequence|gi|295427484|ref|NZ_GG770522.1|	0.064	99.936	501	786856	787357
Staphylococcus_#_aureus_!_M0396_{_genomic_}_scaffold_acunf-supercont1.2_whole_genome_shotgun_sequence|gi|487367086|ref|NZ_KB821297.1|	0.067	99.933	500	740367	740867
Staphylococcus_#_aureus_!_M0408_{_genomic_}_scaffold_acrHk-supercont1.1_whole_genome_shotgun_sequence|gi|486293955|ref|NZ_KB821326.1|	0.041	99.959	500	1207223	1207723
Staphylococcus_#_aureus_!_M0633_{_genomic_}_scaffold_acyCm-supercont1.4_whole_genome_shotgun_sequence|gi|487372090|ref|NZ_KB821510.1|	0.077	99.923	500	649189	649689
Staphylococcus_#_aureus_!_M0695_{_genomic_}_scaffold_acunx-supercont1.2_whole_genome_shotgun_sequence|gi|489044993|ref|NZ_KB821607.1|	0.304	99.696	500	163993	164493
Staphylococcus_#_aureus_!_M1034_{_genomic_}_scaffold_acumn-supercont1.1_whole_genome_shotgun_sequence|gi|487391239|ref|NZ_KB821848.1|	0.05	99.95	500	1008736	1009236
Staphylococcus_#_aureus_!_M1256_{_genomic_}_scaffold_acunO-supercont1.1_whole_genome_shotgun_sequence|gi|487397331|ref|NZ_KB822114.1|	0.036	99.964	500	1373396	1373896
Staphylococcus_#_aureus_!_M1309_{_genomic_}_scaffold_acunC-supercont1.6_whole_genome_shotgun_sequence|gi|487398463|ref|NZ_KB822161.1|	0.424	99.576	500	117474	117974
Staphylococcus_#_aureus_!_subsp._{_aureus_}_M809_genomic_scaffold_supercont1.25_whole_genome_shotgun_sequence|gi|293511363|ref|NZ_GG749323.1|	0.09	99.91	500	552820	553320
Staphylococcus_#_aureus_!_subsp._{_aureus_}_USA300_TCH959_genomic_scaffold_SCAFFOLD2_whole_genome_shotgun_sequence|gi|255926318|ref|NZ_GG697986.1|	0.049	99.951	500	1017747	1018247
Staphylococcus_#_epidermidis_!_M0881_{_genomic_}_scaffold_acumm-supercont1.6_whole_genome_shotgun_sequence|gi|489048088|ref|NZ_KB821726.1|	0.05	99.95	500	1004714	1005214
Staphylococcus_#_aureus_!_M1256_{_genomic_}_scaffold_acunO-supercont1.2_whole_genome_shotgun_sequence|gi|487397459|ref|NZ_KB822115.1|	0.028	99.972	401	1428827	1429228
Staphylococcus_#_aureus_!_M1311_{_genomic_}_scaffold_aculZ-supercont1.5_whole_genome_shotgun_sequence|gi|486843581|ref|NZ_KB822179.1|	0.069	99.931	401	582515	582916
Staphylococcus_#_aureus_!_subsp._{_aureus_}_65-1322_genomic_scaffold_supercont1.6_whole_genome_shotgun_sequence|gi|257427710|ref|NZ_GG700564.1|	0.04	99.96	401	1004486	1004887
Staphylococcus_#_aureus_!_subsp._{_aureus_}_A017934/97_genomic_scaffold_supercont1.9_whole_genome_shotgun_sequence|gi|283957738|ref|NZ_GG731503.1|	0.041	99.959	401	974611	975012
Staphylococcus_#_aureus_!_subsp._{_aureus_}_Btn1260_genomic_scaffold_supercont1.7_whole_genome_shotgun_sequence|gi|282905315|ref|NZ_GG730262.1|	0.039	99.961	401	1017886	1018287
Staphylococcus_#_aureus_!_subsp._{_aureus_}_C160_genomic_scaffold_supercont1.7_whole_genome_shotgun_sequence|gi|282903541|ref|NZ_GG730279.1|	0.041	99.959	401	974559	974960
Staphylococcus_#_aureus_!_subsp._{_aureus_}_C427_genomic_scaffold_supercont1.8_whole_genome_shotgun_sequence|gi|282918694|ref|NZ_GG730148.1|	0.04	99.96	401	996709	997110
Staphylococcus_#_aureus_!_subsp._{_aureus_}_D139_genomic_scaffold_supercont1.17_whole_genome_shotgun_sequence|gi|282916507|ref|NZ_GG730175.1|	0.058	99.942	401	696472	696873
Staphylococcus_#_aureus_!_subsp._{_aureus_}_E1410_genomic_scaffold_supercont1.7_whole_genome_shotgun_sequence|gi|257433049|ref|NZ_GG700603.1|	0.04	99.96	401	994482	994883
Staphylococcus_#_aureus_!_subsp._{_aureus_}_H19_genomic_scaffold_supercont1.8_whole_genome_shotgun_sequence|gi|283769672|ref|NZ_GG730342.1|	0.029	99.971	401	1385934	1386335
Staphylococcus_#_aureus_!_subsp._{_aureus_}_WBG10049_genomic_scaffold_supercont1.4_whole_genome_shotgun_sequence|gi|282910573|ref|NZ_GG730211.1|	0.098	99.902	401	408352	408753
Staphylococcus_#_aureus_!_M0326_{_genomic_}_scaffold_acrHf-supercont1.7_whole_genome_shotgun_sequence|gi|486269445|ref|NZ_KB821208.1|	0.44	99.56	400	90420	90820
Staphylococcus_#_aureus_!_M0424_{_genomic_}_scaffold_acunn-supercont1.4_whole_genome_shotgun_sequence|gi|487368234|ref|NZ_KB821340.1|	0.135	99.865	400	296683	297083
Staphylococcus_#_aureus_!_M0633_{_genomic_}_scaffold_acyCm-supercont1.3_whole_genome_shotgun_sequence|gi|487371977|ref|NZ_KB821509.1|	0.133	99.867	400	301253	301653
Staphylococcus_#_aureus_!_M1462_{_genomic_}_scaffold_acumH-supercont1.1_whole_genome_shotgun_sequence|gi|487135346|ref|NZ_KB822550.1|	0.079	99.921	400	506538	506938
Staphylococcus_#_aureus_!_subsp._{_aureus_}_58-424_genomic_scaffold_supercont1.3_whole_genome_shotgun_sequence|gi|293497427|ref|NZ_GG749056.1|	0.039	99.961	400	1024806	1025206
Staphylococcus_#_aureus_!_subsp._{_aureus_}_65-1322_genomic_scaffold_supercont1.2_whole_genome_shotgun_sequence|gi|257426332|ref|NZ_GG700560.1|	0.039	99.961	400	1019944	1020344
Staphylococcus_#_aureus_!_subsp._{_aureus_}_68-397_genomic_scaffold_supercont1.1_whole_genome_shotgun_sequence|gi|257428975|ref|NZ_GG700574.1|	0.039	99.961	400	1013240	1013640
Staphylococcus_#_aureus_!_subsp._{_aureus_}_A017934/97_genomic_scaffold_supercont1.19_whole_genome_shotgun_sequence|gi|283958999|ref|NZ_GG731513.1|	0.04	99.96	400	992041	992441
Staphylococcus_#_aureus_!_subsp._{_aureus_}_ATCC_51811_genomic_scaffold_SCAFFOLD2_whole_genome_shotgun_sequence|gi|297210120|ref|NZ_GG774481.1|	0.035	99.965	400	1141811	1142211
Staphylococcus_#_aureus_!_subsp._{_aureus_}_Btn1260_genomic_scaffold_supercont1.14_whole_genome_shotgun_sequence|gi|282906513|ref|NZ_GG730269.1|	0.039	99.961	400	1027779	1028179
Staphylococcus_#_aureus_!_subsp._{_aureus_}_C101_genomic_scaffold_supercont1.2_whole_genome_shotgun_sequence|gi|282922348|ref|NZ_GG730121.1|	0.061	99.939	400	656247	656647
Staphylococcus_#_aureus_!_subsp._{_aureus_}_E1410_genomic_scaffold_supercont1.2_whole_genome_shotgun_sequence|gi|257431621|ref|NZ_GG700598.1|	0.038	99.962	400	1057226	1057626
Staphylococcus_#_aureus_!_subsp._{_aureus_}_M1015_genomic_scaffold_supercont1.19_whole_genome_shotgun_sequence|gi|293549604|ref|NZ_GG749014.1|	0.039	99.961	400	1016243	1016643
Staphylococcus_#_aureus_!_subsp._{_aureus_}_M876_genomic_scaffold_supercont1.2_whole_genome_shotgun_sequence|gi|257434580|ref|NZ_GG700615.1|	0.039	99.961	400	1014840	1015240
Staphylococcus_#_aureus_!_subsp._{_aureus_}_M899_genomic_scaffold_supercont1.2_whole_genome_shotgun_sequence|gi|282912717|ref|NZ_GG730191.1|	0.061	99.939	400	653149	653549
Staphylococcus_#_aureus_!_subsp._{_aureus_}_MRSA131_genomic_scaffold_Scfld55_whole_genome_shotgun_sequence|gi|422745238|ref|NZ_GL638171.1|	0.298	99.702	400	133777	134177
Staphylococcus_#_aureus_!_subsp._{_aureus_}_MRSA177_genomic_scaffold_Scfld16_whole_genome_shotgun_sequence|gi|422742271|ref|NZ_GL638201.1|	0.882	99.118	400	44946	45346
Staphylococcus_#_aureus_!_subsp._{_aureus_}_TCH130_genomic_scaffold_SCAFFOLD1_whole_genome_shotgun_sequence|gi|255925763|ref|NZ_GG698158.1|	0.058	99.942	400	690022	690422
Staphylococcus_#_aureus_!_subsp._{_aureus_}_WBG10049_genomic_scaffold_supercont1.11_whole_genome_shotgun_sequence|gi|282911740|ref|NZ_GG730218.1|	0.039	99.961	400	1037888	1038288
Staphylococcus_#_aureus_!_subsp._{_aureus_}_55/2053_genomic_scaffold_supercont1.5_whole_genome_shotgun_sequence|gi|257425216|ref|NZ_GG700537.1|	0.075	99.925	301	399246	399547
Staphylococcus_#_aureus_!_subsp._{_aureus_}_58-424_genomic_scaffold_supercont1.6_whole_genome_shotgun_sequence|gi|293500395|ref|NZ_GG749059.1|	0.03	99.97	301	1006774	1007075
Staphylococcus_#_aureus_!_subsp._{_aureus_}_68-397_genomic_scaffold_supercont1.6_whole_genome_shotgun_sequence|gi|257430345|ref|NZ_GG700579.1|	0.052	99.948	301	579321	579622
Staphylococcus_#_aureus_!_subsp._{_aureus_}_C101_genomic_scaffold_supercont1.9_whole_genome_shotgun_sequence|gi|282924193|ref|NZ_GG730128.1|	0.135	99.865	301	223059	223360
Staphylococcus_#_aureus_!_subsp._{_aureus_}_M1015_genomic_scaffold_supercont1.6_whole_genome_shotgun_sequence|gi|293526348|ref|NZ_GG749001.1|	0.064	99.936	301	469980	470281
Staphylococcus_#_aureus_!_subsp._{_aureus_}_M809_genomic_scaffold_supercont1.11_whole_genome_shotgun_sequence|gi|293509961|ref|NZ_GG749309.1|	0.083	99.917	301	362070	362371
Staphylococcus_#_aureus_!_subsp._{_aureus_}_M876_genomic_scaffold_supercont1.6_whole_genome_shotgun_sequence|gi|257435946|ref|NZ_GG700619.1|	0.052	99.948	301	574583	574884
Staphylococcus_#_aureus_!_subsp._{_aureus_}_M899_genomic_scaffold_supercont1.7_whole_genome_shotgun_sequence|gi|282913769|ref|NZ_GG730196.1|	0.052	99.948	301	575822	576123
Staphylococcus_#_aureus_!_subsp._{_aureus_}_MRSA177_genomic_scaffold_Scfld52_whole_genome_shotgun_sequence|gi|422742750|ref|NZ_GL638208.1|	0.265	99.735	301	113127	113428
Staphylococcus_#_aureus_!_M0077_{_genomic_}_scaffold_acunP-supercont1.1_whole_genome_shotgun_sequence|gi|487349956|ref|NZ_KB820999.1|	0.027	99.973	300	1118355	1118655
Staphylococcus_#_aureus_!_M0455_{_genomic_}_scaffold_acqxx-supercont1.1_whole_genome_shotgun_sequence|gi|487379684|ref|NZ_KB821355.1|	0.011	99.989	300	2726340	2726640
Staphylococcus_#_aureus_!_M0494_{_genomic_}_scaffold_acqyb-supercont1.1_whole_genome_shotgun_sequence|gi|486320731|ref|NZ_KB821405.1|	0.011	99.989	300	2783002	2783302
Staphylococcus_#_aureus_!_M0586_{_genomic_}_scaffold_acunQ-supercont1.1_whole_genome_shotgun_sequence|gi|487371607|ref|NZ_KB821500.1|	0.01	99.99	300	2927724	2928024
Staphylococcus_#_aureus_!_M0633_{_genomic_}_scaffold_acyCm-supercont1.1_whole_genome_shotgun_sequence|gi|487371765|ref|NZ_KB821507.1|	0.056	99.944	300	534220	534520
Staphylococcus_#_aureus_!_M0946_{_genomic_}_scaffold_acunJ-supercont1.3_whole_genome_shotgun_sequence|gi|487387957|ref|NZ_KB821788.1|	0.048	99.952	300	622730	623030
Staphylococcus_#_aureus_!_M1228_{_genomic_}_scaffold_acunW-supercont1.1_whole_genome_shotgun_sequence|gi|487401221|ref|NZ_KB822376.1|	0.024	99.976	300	1231727	1232027
Staphylococcus_#_aureus_!_subsp._{_aureus_}_EMRSA16_genomic_scaffold_supercont1.20_whole_genome_shotgun_sequence|gi|295428968|ref|NZ_GG770532.1|	0.073	99.927	300	412028	412328
Staphylococcus_#_aureus_!_subsp._{_aureus_}_MRSA131_genomic_scaffold_Scfld122_whole_genome_shotgun_sequence|gi|422746016|ref|NZ_GL638181.1|	0.087	99.913	300	345219	345519
Staphylococcus_#_aureus_!_subsp._{_aureus_}_MRSA131_genomic_scaffold_Scfld482_whole_genome_shotgun_sequence|gi|422747280|ref|NZ_GL638197.1|	0.155	99.845	300	193092	193392
Staphylococcus_#_aureus_!_subsp._{_aureus_}_MRSA177_genomic_scaffold_Scfld173_whole_genome_shotgun_sequence|gi|422743415|ref|NZ_GL638224.1|	0.096	99.904	300	312571	312871
Staphylococcus_#_aureus_!_subsp._{_aureus_}_MRSA177_genomic_scaffold_Scfld209_whole_genome_shotgun_sequence|gi|422743733|ref|NZ_GL638226.1|	0.267	99.733	300	111925	112225
Staphylococcus_#_aureus_!_subsp._{_aureus_}_TCH130_genomic_scaffold_SCAFFOLD2_whole_genome_shotgun_sequence|gi|255925764|ref|NZ_GG698159.1|	0.047	99.953	300	634468	634768
Staphylococcus_#_aureus_!_subsp._{_aureus_}_WW2703/97_genomic_scaffold_supercont1.36_whole_genome_shotgun_sequence|gi|282909938|ref|NZ_GG730255.1|	0.143	99.857	300	209717	210017
Staphylococcus_#_warneri_!_SG1_{_complete_}_genome|gi|445058371|ref|NC_020164.1|	0.012	99.988	300	2485742	2486042
Bacillus_#_megaterium_!_DSM_{_319_}_chromosome_complete_genome|gi|295702242|ref|NC_014103.1|	0.004	99.996	203	5097244	5097447
Bacillus_#_megaterium_!_QM_{_B1551_}_chromosome_complete_genome|gi|294496875|ref|NC_014019.1|	0.004	99.996	203	5096926	5097129
Staphylococcus_#_aureus_!_subsp._{_aureus_}_WW2703/97_genomic_scaffold_supercont1.23_whole_genome_shotgun_sequence|gi|282908628|ref|NZ_GG730242.1|	0.369	99.631	201	54223	54424
Staphylococcus_#_aureus_!_HI013_{_genomic_}_scaffold_acqwl-supercont1.3_whole_genome_shotgun_sequence|gi|486215850|ref|NZ_KB820900.1|	0.176	99.824	200	113466	113666
Staphylococcus_#_aureus_!_M0035_{_genomic_}_scaffold_acqxl-supercont1.2_whole_genome_shotgun_sequence|gi|486228657|ref|NZ_KB820966.1|	0.007	99.993	200	2860595	2860795
Staphylococcus_#_aureus_!_M0075_{_genomic_}_scaffold_acunI-supercont1.1_whole_genome_shotgun_sequence|gi|487399773|ref|NZ_KB822347.1|	0.019	99.981	200	1063621	1063821
Staphylococcus_#_aureus_!_M0171_{_genomic_}_scaffold_acqwu-supercont1.5_whole_genome_shotgun_sequence|gi|487372978|ref|NZ_KB821065.1|	0.013	99.987	200	1520696	1520896
Staphylococcus_#_aureus_!_M0306_{_genomic_}_scaffold_acunR-supercont1.1_whole_genome_shotgun_sequence|gi|487363159|ref|NZ_KB821198.1|	0.007	99.993	200	2873806	2874006
Staphylococcus_#_aureus_!_M0340_{_genomic_}_scaffold_acqxN-supercont1.3_whole_genome_shotgun_sequence|gi|486281296|ref|NZ_KB821243.1|	0.111	99.889	200	179714	179914
Staphylococcus_#_aureus_!_M0350_{_genomic_}_scaffold_acunH-supercont1.2_whole_genome_shotgun_sequence|gi|487364069|ref|NZ_KB821251.1|	0.007	99.993	200	2711154	2711354
Staphylococcus_#_aureus_!_M0363_{_genomic_}_scaffold_acunN-supercont1.2_whole_genome_shotgun_sequence|gi|487364822|ref|NZ_KB821272.1|	0.007	99.993	200	2847272	2847472
Staphylococcus_#_aureus_!_M0367_{_genomic_}_scaffold_acunU-supercont1.3_whole_genome_shotgun_sequence|gi|487365191|ref|NZ_KB821276.1|	0.007	99.993	200	2875754	2875954
Staphylococcus_#_aureus_!_M0396_{_genomic_}_scaffold_acunf-supercont1.3_whole_genome_shotgun_sequence|gi|487367179|ref|NZ_KB821298.1|	0.048	99.952	200	415087	415287
Staphylococcus_#_aureus_!_M0510_{_genomic_}_scaffold_acumF-supercont1.3_whole_genome_shotgun_sequence|gi|487369026|ref|NZ_KB821409.1|	0.015	99.985	200	1322807	1323007
Staphylococcus_#_aureus_!_M0536_{_genomic_}_scaffold_acvqu-supercont1.3_whole_genome_shotgun_sequence|gi|486345866|ref|NZ_KB821468.1|	0.009	99.991	200	2175611	2175811
Staphylococcus_#_aureus_!_M0571_{_genomic_}_scaffold_acumO-supercont1.2_whole_genome_shotgun_sequence|gi|487370688|ref|NZ_KB821477.1|	0.007	99.993	200	2899555	2899755
Staphylococcus_#_aureus_!_M0584_{_genomic_}_scaffold_acunu-supercont1.3_whole_genome_shotgun_sequence|gi|487371238|ref|NZ_KB821491.1|	0.017	99.983	200	1150175	1150375
Staphylococcus_#_aureus_!_M0792_{_genomic_}_scaffold_acuni-supercont1.8_whole_genome_shotgun_sequence|gi|487383273|ref|NZ_KB821678.1|	0.011	99.989	200	1790393	1790593
Staphylococcus_#_aureus_!_M0877_{_genomic_}_scaffold_acumt-supercont1.2_whole_genome_shotgun_sequence|gi|487385040|ref|NZ_KB821715.1|	0.019	99.981	200	1068482	1068682
Staphylococcus_#_aureus_!_M1007_{_genomic_}_scaffold_acvqZ-supercont1.4_whole_genome_shotgun_sequence|gi|486401664|ref|NZ_KB821832.1|	0.172	99.828	200	116079	116279
Staphylococcus_#_aureus_!_M1060_{_genomic_}_scaffold_acunt-supercont1.1_whole_genome_shotgun_sequence|gi|487400592|ref|NZ_KB822368.1|	0.008	99.992	200	2355858	2356058
Staphylococcus_#_aureus_!_M1064_{_genomic_}_scaffold_acumU-supercont1.3_whole_genome_shotgun_sequence|gi|486419946|ref|NZ_KB821939.1|	0.087	99.913	200	230665	230865
Staphylococcus_#_aureus_!_M1064_{_genomic_}_scaffold_acumU-supercont1.7_whole_genome_shotgun_sequence|gi|486421041|ref|NZ_KB821943.1|	0.112	99.888	200	177871	178071
Staphylococcus_#_aureus_!_M1064_{_genomic_}_scaffold_acumU-supercont1.8_whole_genome_shotgun_sequence|gi|486421189|ref|NZ_KB821944.1|	0.166	99.834	200	120039	120239
Staphylococcus_#_aureus_!_M1223_{_genomic_}_scaffold_acune-supercont1.4_whole_genome_shotgun_sequence|gi|487396450|ref|NZ_KB822074.1|	0.176	99.824	200	113169	113369
Staphylococcus_#_aureus_!_M1311_{_genomic_}_scaffold_aculZ-supercont1.3_whole_genome_shotgun_sequence|gi|486835574|ref|NZ_KB822177.1|	0.015	99.985	200	1293712	1293912
Staphylococcus_#_aureus_!_M1367_{_genomic_}_scaffold_acumK-supercont1.2_whole_genome_shotgun_sequence|gi|487027023|ref|NZ_KB822208.1|	0.007	99.993	200	2874256	2874456
Staphylococcus_#_aureus_!_subsp._{_aureus_}_C101_genomic_scaffold_supercont1.8_whole_genome_shotgun_sequence|gi|282923802|ref|NZ_GG730127.1|	0.056	99.944	200	359247	359447
Staphylococcus_#_aureus_!_subsp._{_aureus_}_C160_genomic_scaffold_supercont1.2_whole_genome_shotgun_sequence|gi|282902071|ref|NZ_GG730274.1|	0.019	99.981	200	1041624	1041824
Staphylococcus_#_aureus_!_subsp._{_aureus_}_C427_genomic_scaffold_supercont1.18_whole_genome_shotgun_sequence|gi|282920745|ref|NZ_GG730158.1|	0.02	99.98	200	993454	993654
Staphylococcus_#_aureus_!_subsp._{_aureus_}_H19_genomic_scaffold_supercont1.2_whole_genome_shotgun_sequence|gi|283767263|ref|NZ_GG730336.1|	0.02	99.98	200	1019751	1019951
Staphylococcus_#_aureus_!_subsp._{_aureus_}_MRSA131_genomic_scaffold_Scfld13_whole_genome_shotgun_sequence|gi|422744965|ref|NZ_GL638164.1|	0.561	99.439	200	35477	35677
Staphylococcus_#_aureus_!_subsp._{_aureus_}_MRSA131_genomic_scaffold_Scfld228_whole_genome_shotgun_sequence|gi|422746915|ref|NZ_GL638189.1|	0.116	99.884	200	172504	172704
Staphylococcus_#_aureus_!_subsp._{_aureus_}_MRSA131_genomic_scaffold_Scfld545_whole_genome_shotgun_sequence|gi|422747480|ref|NZ_GL638198.1|	0.068	99.932	200	294692	294892
Staphylococcus_#_aureus_!_subsp._{_aureus_}_MRSA177_genomic_scaffold_Scfld20_whole_genome_shotgun_sequence|gi|422742311|ref|NZ_GL638202.1|	0.186	99.814	200	107487	107687
Staphylococcus_#_aureus_!_subsp._{_aureus_}_MRSA177_genomic_scaffold_Scfld252_whole_genome_shotgun_sequence|gi|422743901|ref|NZ_GL638230.1|	0.139	99.861	200	143551	143751
Staphylococcus_#_aureus_!_subsp._{_aureus_}_MRSA177_genomic_scaffold_Scfld61_whole_genome_shotgun_sequence|gi|422743031|ref|NZ_GL638213.1|	0.369	99.631	200	54068	54268
Staphylococcus_#_aureus_!_subsp._{_aureus_}_MRSA177_genomic_scaffold_Scfld63_whole_genome_shotgun_sequence|gi|422743087|ref|NZ_GL638214.1|	0.561	99.439	200	35477	35677
Staphylococcus_#_aureus_!_subsp._{_aureus_}_TCH130_genomic_scaffold_SCAFFOLD4_whole_genome_shotgun_sequence|gi|255925766|ref|NZ_GG698161.1|	0.098	99.902	200	203008	203208
Staphylococcus_#_aureus_!_subsp._{_aureus_}_WW2703/97_genomic_scaffold_supercont1.14_whole_genome_shotgun_sequence|gi|282908455|ref|NZ_GG730233.1|	0.119	99.881	200	167914	168114
Staphylococcus_#_carnosus_!_subsp._{_carnosus_}_TM300_chromosome_complete_genome|gi|224475494|ref|NC_012121.1|	0.008	99.992	200	2566224	2566424
Staphylococcus_#_epidermidis_!_BCM-HMP0060_{_genomic_}_scaffold_SCAFFOLD1_whole_genome_shotgun_sequence|gi|254281370|ref|NZ_GG696727.1|	0.022	99.978	200	907939	908139
Staphylococcus_#_epidermidis_!_M23864:W2(grey)_{_genomic_}_scaffold_SCAFFOLD1_whole_genome_shotgun_sequence|gi|293368503|ref|NZ_GG749255.1|	0.012	99.988	200	1665489	1665689
Staphylococcus_#_pseudintermedius_!_ED99_{_chromosome_}_complete_genome|gi|386318029|ref|NC_017568.1|	0.008	99.992	200	2572016	2572216
Staphylococcus_#_pseudintermedius_!_HKU10-03_{_chromosome_}_complete_genome|gi|319891290|ref|NC_014925.1|	0.008	99.992	200	2617181	2617381
Bacillus_#_megaterium_!_WSH-002_{_chromosome_}_complete_genome|gi|384044176|ref|NC_017138.1|	0.002	99.998	101	4983874	4983975
Bacillus_#_sp._!_37MA_{_A3M5DRAFT_scaffold1.1_}_whole_genome_shotgun_sequence|gi|483722481|ref|NZ_KB889752.1|	0.003	99.997	101	3763946	3764047
Staphylococcus_#_aureus_!_M0177_{_genomic_}_scaffold_acumi-supercont1.5_whole_genome_shotgun_sequence|gi|487360174|ref|NZ_KB821082.1|	0.009	99.991	101	1069675	1069776
Bacillus_#_sp._!_10403023_{_MM10403188_}_genomic_scaffold_scaffold00004_whole_genome_shotgun_sequence|gi|403048279|ref|NZ_HE610988.1|	0.02	99.98	100	496705	496805
Staphylococcus_#_aureus_!_B147830_{_genomic_}_scaffold_acqwB-supercont1.1_whole_genome_shotgun_sequence|gi|486331236|ref|NZ_KB822311.1|	0.022	99.978	100	449398	449498
Staphylococcus_#_aureus_!_M0001_{_genomic_}_scaffold_acrHn-supercont1.15_whole_genome_shotgun_sequence|gi|486217883|ref|NZ_KB820933.1|	0.366	99.634	100	27251	27351
Staphylococcus_#_aureus_!_M0001_{_genomic_}_scaffold_acrHn-supercont1.2_whole_genome_shotgun_sequence|gi|486220991|ref|NZ_KB820938.1|	0.008	99.992	100	1188027	1188127
Staphylococcus_#_aureus_!_M0006_{_genomic_}_scaffold_aculO-supercont1.8_whole_genome_shotgun_sequence|gi|487267757|ref|NZ_KB820960.1|	0.01	99.99	100	960650	960750
Staphylococcus_#_aureus_!_M0029_{_genomic_}_scaffold_acqwZ-supercont1.2_whole_genome_shotgun_sequence|gi|486225786|ref|NZ_KB820963.1|	0.003	99.997	100	2863079	2863179
Staphylococcus_#_aureus_!_M0045_{_genomic_}_scaffold_acqxU-supercont1.3_whole_genome_shotgun_sequence|gi|486231608|ref|NZ_KB820971.1|	0.004	99.996	100	2248717	2248817
Staphylococcus_#_aureus_!_M0060_{_genomic_}_scaffold_acrGU-supercont1.1_whole_genome_shotgun_sequence|gi|487315894|ref|NZ_KB820981.1|	0.006	99.994	100	1768962	1769062
Staphylococcus_#_aureus_!_M0060_{_genomic_}_scaffold_acrGU-supercont1.4_whole_genome_shotgun_sequence|gi|487336408|ref|NZ_KB820987.1|	0.022	99.978	100	453504	453604
Staphylococcus_#_aureus_!_M0077_{_genomic_}_scaffold_acunP-supercont1.2_whole_genome_shotgun_sequence|gi|487350114|ref|NZ_KB821000.1|	0.008	99.992	100	1223561	1223661
Staphylococcus_#_aureus_!_M0077_{_genomic_}_scaffold_acunP-supercont1.3_whole_genome_shotgun_sequence|gi|487350165|ref|NZ_KB821001.1|	0.033	99.967	100	305584	305684
Staphylococcus_#_aureus_!_M0102_{_genomic_}_scaffold_acqwC-supercont1.1_whole_genome_shotgun_sequence|gi|486239304|ref|NZ_KB821006.1|	0.028	99.972	100	351311	351411
Staphylococcus_#_aureus_!_M0102_{_genomic_}_scaffold_acqwC-supercont1.6_whole_genome_shotgun_sequence|gi|486241470|ref|NZ_KB821011.1|	0.012	99.988	100	831310	831410
Staphylococcus_#_aureus_!_M0103_{_genomic_}_scaffold_acqxd-supercont1.1_whole_genome_shotgun_sequence|gi|486242902|ref|NZ_KB821012.1|	0.009	99.991	100	1118063	1118163
Staphylococcus_#_aureus_!_M0103_{_genomic_}_scaffold_acqxd-supercont1.4_whole_genome_shotgun_sequence|gi|486246367|ref|NZ_KB821017.1|	0.008	99.992	100	1222262	1222362
Staphylococcus_#_aureus_!_M0104_{_genomic_}_scaffold_acrHp-supercont1.1_whole_genome_shotgun_sequence|gi|487372340|ref|NZ_KB821023.1|	0.008	99.992	100	1295801	1295901
Staphylococcus_#_aureus_!_M0104_{_genomic_}_scaffold_acrHp-supercont1.7_whole_genome_shotgun_sequence|gi|487372667|ref|NZ_KB821030.1|	0.016	99.984	100	612799	612899
Staphylococcus_#_aureus_!_M0108_{_genomic_}_scaffold_acunZ-supercont1.2_whole_genome_shotgun_sequence|gi|487356577|ref|NZ_KB821034.1|	0.028	99.972	100	351718	351818
Staphylococcus_#_aureus_!_M0108_{_genomic_}_scaffold_acunZ-supercont1.5_whole_genome_shotgun_sequence|gi|487358807|ref|NZ_KB821037.1|	0.009	99.991	100	1161003	1161103
Staphylococcus_#_aureus_!_M0144_{_genomic_}_scaffold_acunq-supercont1.1_whole_genome_shotgun_sequence|gi|487359044|ref|NZ_KB821038.1|	0.007	99.993	100	1348934	1349034
Staphylococcus_#_aureus_!_M0144_{_genomic_}_scaffold_acunq-supercont1.3_whole_genome_shotgun_sequence|gi|487359205|ref|NZ_KB821040.1|	0.011	99.989	100	926892	926992
Staphylococcus_#_aureus_!_M0171_{_genomic_}_scaffold_acqwu-supercont1.1_whole_genome_shotgun_sequence|gi|487372817|ref|NZ_KB821061.1|	0.009	99.991	100	1163400	1163500
Staphylococcus_#_aureus_!_M0197_{_genomic_}_scaffold_acrGV-supercont1.1_whole_genome_shotgun_sequence|gi|486256732|ref|NZ_KB821084.1|	0.005	99.995	100	1932676	1932776
Staphylococcus_#_aureus_!_M0197_{_genomic_}_scaffold_acrGV-supercont1.3_whole_genome_shotgun_sequence|gi|486257669|ref|NZ_KB821086.1|	0.019	99.981	100	516689	516789
Staphylococcus_#_aureus_!_M0200_{_genomic_}_scaffold_acumC-supercont1.12_whole_genome_shotgun_sequence|gi|487360390|ref|NZ_KB821095.1|	0.009	99.991	100	1077123	1077223
Staphylococcus_#_aureus_!_M0200_{_genomic_}_scaffold_acumC-supercont1.6_whole_genome_shotgun_sequence|gi|487360555|ref|NZ_KB821101.1|	0.008	99.992	100	1223169	1223269
Staphylococcus_#_aureus_!_M0212_{_genomic_}_scaffold_acuna-supercont1.3_whole_genome_shotgun_sequence|gi|487360877|ref|NZ_KB821112.1|	0.008	99.992	100	1257601	1257701
Staphylococcus_#_aureus_!_M0221_{_genomic_}_scaffold_acqxa-supercont1.1_whole_genome_shotgun_sequence|gi|486258704|ref|NZ_KB821123.1|	0.595	99.405	100	16713	16813
Staphylococcus_#_aureus_!_M0237_{_genomic_}_scaffold_acrHd-supercont1.2_whole_genome_shotgun_sequence|gi|486261107|ref|NZ_KB821134.1|	0.019	99.981	100	537638	537738
Staphylococcus_#_aureus_!_M0237_{_genomic_}_scaffold_acrHd-supercont1.6_whole_genome_shotgun_sequence|gi|486262447|ref|NZ_KB821138.1|	0.016	99.984	100	624436	624536
Staphylococcus_#_aureus_!_M0240_{_genomic_}_scaffold_acqwO-supercont1.11_whole_genome_shotgun_sequence|gi|487374136|ref|NZ_KB821145.1|	0.014	99.986	100	697619	697719
Staphylococcus_#_aureus_!_M0250_{_genomic_}_scaffold_acuma-supercont1.1_whole_genome_shotgun_sequence|gi|487362212|ref|NZ_KB821141.1|	0.003	99.997	100	2868227	2868327
Staphylococcus_#_aureus_!_M0270_{_genomic_}_scaffold_acrGX-supercont1.1_whole_genome_shotgun_sequence|gi|487374734|ref|NZ_KB821154.1|	0.009	99.991	100	1114190	1114290
Staphylococcus_#_aureus_!_M0270_{_genomic_}_scaffold_acrGX-supercont1.5_whole_genome_shotgun_sequence|gi|487374986|ref|NZ_KB821162.1|	0.03	99.97	100	335643	335743
Staphylococcus_#_aureus_!_M0279_{_genomic_}_scaffold_acqxn-supercont1.2_whole_genome_shotgun_sequence|gi|487375990|ref|NZ_KB821175.1|	0.006	99.994	100	1738415	1738515
Staphylococcus_#_aureus_!_M0279_{_genomic_}_scaffold_acqxn-supercont1.3_whole_genome_shotgun_sequence|gi|487376092|ref|NZ_KB821176.1|	0.009	99.991	100	1114374	1114474
Staphylococcus_#_aureus_!_M0280_{_genomic_}_scaffold_acunT-supercont1.6_whole_genome_shotgun_sequence|gi|487362590|ref|NZ_KB821186.1|	0.011	99.989	100	930595	930695
Staphylococcus_#_aureus_!_M0280_{_genomic_}_scaffold_acunT-supercont1.8_whole_genome_shotgun_sequence|gi|487362733|ref|NZ_KB821188.1|	0.006	99.994	100	1712026	1712126
Staphylococcus_#_aureus_!_M0288_{_genomic_}_scaffold_acqwg-supercont1.1_whole_genome_shotgun_sequence|gi|487376330|ref|NZ_KB821190.1|	0.008	99.992	100	1230951	1231051
Staphylococcus_#_aureus_!_M0288_{_genomic_}_scaffold_acqwg-supercont1.7_whole_genome_shotgun_sequence|gi|487376592|ref|NZ_KB821196.1|	0.009	99.991	100	1155588	1155688
Staphylococcus_#_aureus_!_M0294_{_genomic_}_scaffold_acumG-supercont1.1_whole_genome_shotgun_sequence|gi|487400027|ref|NZ_KB822352.1|	0.007	99.993	100	1377094	1377194
Staphylococcus_#_aureus_!_M0294_{_genomic_}_scaffold_acumG-supercont1.7_whole_genome_shotgun_sequence|gi|487400143|ref|NZ_KB822359.1|	0.013	99.987	100	763705	763805
Staphylococcus_#_aureus_!_M0326_{_genomic_}_scaffold_acrHf-supercont1.8_whole_genome_shotgun_sequence|gi|486270247|ref|NZ_KB821209.1|	0.009	99.991	100	1117758	1117858
Staphylococcus_#_aureus_!_M0328_{_genomic_}_scaffold_acrGR-supercont1.3_whole_genome_shotgun_sequence|gi|486272254|ref|NZ_KB821213.1|	0.015	99.985	100	646120	646220
Staphylococcus_#_aureus_!_M0329_{_genomic_}_scaffold_acrHa-supercont1.6_whole_genome_shotgun_sequence|gi|486274654|ref|NZ_KB821230.1|	0.012	99.988	100	802514	802614
Staphylococcus_#_aureus_!_M0329_{_genomic_}_scaffold_acrHa-supercont1.9_whole_genome_shotgun_sequence|gi|486276662|ref|NZ_KB821233.1|	0.014	99.986	100	739117	739217
Staphylococcus_#_aureus_!_M0334_{_genomic_}_scaffold_acumz-supercont1.1_whole_genome_shotgun_sequence|gi|487363432|ref|NZ_KB821234.1|	0.007	99.993	100	1383157	1383257
Staphylococcus_#_aureus_!_M0334_{_genomic_}_scaffold_acumz-supercont1.4_whole_genome_shotgun_sequence|gi|487363716|ref|NZ_KB821237.1|	0.007	99.993	100	1528676	1528776
Staphylococcus_#_aureus_!_M0340_{_genomic_}_scaffold_acqxN-supercont1.1_whole_genome_shotgun_sequence|gi|486279730|ref|NZ_KB821241.1|	0.593	99.407	100	16769	16869
Staphylococcus_#_aureus_!_M0375_{_genomic_}_scaffold_acunY-supercont1.1_whole_genome_shotgun_sequence|gi|487365727|ref|NZ_KB821282.1|	0.009	99.991	100	1123698	1123798
Staphylococcus_#_aureus_!_M0375_{_genomic_}_scaffold_acunY-supercont1.6_whole_genome_shotgun_sequence|gi|487366006|ref|NZ_KB821292.1|	0.016	99.984	100	624945	625045
Staphylococcus_#_aureus_!_M0391_{_genomic_}_scaffold_acqwG-supercont1.1_whole_genome_shotgun_sequence|gi|486290024|ref|NZ_KB821309.1|	0.009	99.991	100	1121222	1121322
Staphylococcus_#_aureus_!_M0391_{_genomic_}_scaffold_acqwG-supercont1.6_whole_genome_shotgun_sequence|gi|486291032|ref|NZ_KB821314.1|	0.032	99.968	100	313040	313140
Staphylococcus_#_aureus_!_M0404_{_genomic_}_scaffold_acrGQ-supercont1.6_whole_genome_shotgun_sequence|gi|487378947|ref|NZ_KB821307.1|	0.007	99.993	100	1471108	1471208
Staphylococcus_#_aureus_!_M0415_{_genomic_}_scaffold_acrGP-supercont1.1_whole_genome_shotgun_sequence|gi|487379100|ref|NZ_KB821317.1|	0.008	99.992	100	1228014	1228114
Staphylococcus_#_aureus_!_M0415_{_genomic_}_scaffold_acrGP-supercont1.4_whole_genome_shotgun_sequence|gi|487379243|ref|NZ_KB821320.1|	0.021	99.979	100	473614	473714
Staphylococcus_#_aureus_!_M0450_{_genomic_}_scaffold_acqwq-supercont1.2_whole_genome_shotgun_sequence|gi|486302143|ref|NZ_KB821344.1|	0.016	99.984	100	644903	645003
Staphylococcus_#_aureus_!_M0460_{_genomic_}_scaffold_acqxK-supercont1.4_whole_genome_shotgun_sequence|gi|487379995|ref|NZ_KB821366.1|	0.007	99.993	100	1423113	1423213
Staphylococcus_#_aureus_!_M0468_{_genomic_}_scaffold_acqxk-supercont1.1_whole_genome_shotgun_sequence|gi|486308227|ref|NZ_KB821358.1|	0.593	99.407	100	16769	16869
Staphylococcus_#_aureus_!_M0478_{_genomic_}_scaffold_acrGZ-supercont1.5_whole_genome_shotgun_sequence|gi|486313128|ref|NZ_KB821380.1|	0.011	99.989	100	907918	908018
Staphylococcus_#_aureus_!_M0489_{_genomic_}_scaffold_acsPG-supercont1.8_whole_genome_shotgun_sequence|gi|486318205|ref|NZ_KB821399.1|	0.008	99.992	100	1270231	1270331
Staphylococcus_#_aureus_!_M0529_{_genomic_}_scaffold_acumA-supercont1.1_whole_genome_shotgun_sequence|gi|486413843|ref|NZ_KB821431.1|	0.005	99.995	100	1914418	1914518
Staphylococcus_#_aureus_!_M0529_{_genomic_}_scaffold_acumA-supercont1.3_whole_genome_shotgun_sequence|gi|486414273|ref|NZ_KB821433.1|	0.021	99.979	100	465161	465261
Staphylococcus_#_aureus_!_M0539_{_genomic_}_scaffold_acvqn-supercont1.11_whole_genome_shotgun_sequence|gi|486347448|ref|NZ_KB821452.1|	0.016	99.984	100	623660	623760
Staphylococcus_#_aureus_!_M0539_{_genomic_}_scaffold_acvqn-supercont1.1_whole_genome_shotgun_sequence|gi|486346615|ref|NZ_KB821450.1|	0.009	99.991	100	1088844	1088944
Staphylococcus_#_aureus_!_M0539_{_genomic_}_scaffold_acvqn-supercont1.5_whole_genome_shotgun_sequence|gi|486349175|ref|NZ_KB821461.1|	0.029	99.971	100	345835	345935
Staphylococcus_#_aureus_!_M0547_{_genomic_}_scaffold_acvqJ-supercont1.1_whole_genome_shotgun_sequence|gi|486350836|ref|NZ_KB821442.1|	0.008	99.992	100	1303309	1303409
Staphylococcus_#_aureus_!_M0547_{_genomic_}_scaffold_acvqJ-supercont1.5_whole_genome_shotgun_sequence|gi|486352271|ref|NZ_KB821446.1|	0.016	99.984	100	628665	628765
Staphylococcus_#_aureus_!_M0602_{_genomic_}_scaffold_acvqp-supercont1.4_whole_genome_shotgun_sequence|gi|486359560|ref|NZ_KB821496.1|	0.019	99.981	100	516701	516801
Staphylococcus_#_aureus_!_M0602_{_genomic_}_scaffold_acvqp-supercont1.7_whole_genome_shotgun_sequence|gi|486360548|ref|NZ_KB821499.1|	0.008	99.992	100	1227268	1227368
Staphylococcus_#_aureus_!_M0622_{_genomic_}_scaffold_acvqA-supercont1.2_whole_genome_shotgun_sequence|gi|486361222|ref|NZ_KB821503.1|	0.028	99.972	100	358813	358913
Staphylococcus_#_aureus_!_M0646_{_genomic_}_scaffold_acuoa-supercont1.6_whole_genome_shotgun_sequence|gi|487380761|ref|NZ_KB821517.1|	0.008	99.992	100	1259454	1259554
Staphylococcus_#_aureus_!_M0648_{_genomic_}_scaffold_acunl-supercont1.1_whole_genome_shotgun_sequence|gi|487380947|ref|NZ_KB821519.1|	0.01	99.99	100	1004402	1004502
Staphylococcus_#_aureus_!_M0648_{_genomic_}_scaffold_acunl-supercont1.4_whole_genome_shotgun_sequence|gi|487381120|ref|NZ_KB821525.1|	0.017	99.983	100	591015	591115
Staphylococcus_#_aureus_!_M0648_{_genomic_}_scaffold_acunl-supercont1.6_whole_genome_shotgun_sequence|gi|487381205|ref|NZ_KB821527.1|	0.016	99.984	100	628391	628491
Staphylococcus_#_aureus_!_M0660_{_genomic_}_scaffold_acumg-supercont1.10_whole_genome_shotgun_sequence|gi|487381382|ref|NZ_KB821532.1|	0.016	99.984	100	624285	624385
Staphylococcus_#_aureus_!_M0660_{_genomic_}_scaffold_acumg-supercont1.1_whole_genome_shotgun_sequence|gi|487381360|ref|NZ_KB821531.1|	0.012	99.988	100	859803	859903
Staphylococcus_#_aureus_!_M0663_{_genomic_}_scaffold_acuoc-supercont1.13_whole_genome_shotgun_sequence|gi|487381874|ref|NZ_KB821550.1|	0.015	99.985	100	676169	676269
Staphylococcus_#_aureus_!_M0663_{_genomic_}_scaffold_acuoc-supercont1.6_whole_genome_shotgun_sequence|gi|487382141|ref|NZ_KB821557.1|	0.016	99.984	100	624674	624774
Staphylococcus_#_aureus_!_M0673_{_genomic_}_scaffold_acumv-supercont1.3_whole_genome_shotgun_sequence|gi|487382473|ref|NZ_KB821564.1|	0.012	99.988	100	819560	819660
Staphylococcus_#_aureus_!_M0692_{_genomic_}_scaffold_acvqM-supercont1.8_whole_genome_shotgun_sequence|gi|486369751|ref|NZ_KB821594.1|	0.01	99.99	100	1028084	1028184
Staphylococcus_#_aureus_!_M0695_{_genomic_}_scaffold_acunx-supercont1.3_whole_genome_shotgun_sequence|gi|489044994|ref|NZ_KB821608.1|	0.221	99.779	100	45150	45250
Staphylococcus_#_aureus_!_M0719_{_genomic_}_scaffold_acvrc-supercont1.1_whole_genome_shotgun_sequence|gi|480443880|ref|NZ_KB821615.1|	0.01	99.99	100	976129	976229
Staphylococcus_#_aureus_!_M0770_{_genomic_}_scaffold_acvra-supercont1.1_whole_genome_shotgun_sequence|gi|480449782|ref|NZ_KB821638.1|	0.007	99.993	100	1416236	1416336
Staphylococcus_#_aureus_!_M0799_{_genomic_}_scaffold_acvqq-supercont1.1_whole_genome_shotgun_sequence|gi|486378646|ref|NZ_KB821650.1|	0.009	99.991	100	1081402	1081502
Staphylococcus_#_aureus_!_M0799_{_genomic_}_scaffold_acvqq-supercont1.7_whole_genome_shotgun_sequence|gi|486380307|ref|NZ_KB821659.1|	0.015	99.985	100	675876	675976
Staphylococcus_#_aureus_!_M0823_{_genomic_}_scaffold_acvqk-supercont1.6_whole_genome_shotgun_sequence|gi|486383324|ref|NZ_KB821696.1|	0.011	99.989	100	930196	930296
Staphylococcus_#_aureus_!_M0844_{_genomic_}_scaffold_acvqL-supercont1.2_whole_genome_shotgun_sequence|gi|486385588|ref|NZ_KB821711.1|	0.004	99.996	100	2451359	2451459
Staphylococcus_#_aureus_!_M0892_{_genomic_}_scaffold_aculW-supercont1.3_whole_genome_shotgun_sequence|gi|487385673|ref|NZ_KB821732.1|	0.008	99.992	100	1226462	1226562
Staphylococcus_#_aureus_!_M0900_{_genomic_}_scaffold_acunz-supercont1.6_whole_genome_shotgun_sequence|gi|487386371|ref|NZ_KB821744.1|	0.014	99.986	100	697557	697657
Staphylococcus_#_aureus_!_M0934_{_genomic_}_scaffold_acvqs-supercont1.1_whole_genome_shotgun_sequence|gi|486387797|ref|NZ_KB821760.1|	0.005	99.995	100	2202937	2203037
Staphylococcus_#_aureus_!_M0934_{_genomic_}_scaffold_acvqs-supercont1.2_whole_genome_shotgun_sequence|gi|486388784|ref|NZ_KB821761.1|	0.014	99.986	100	702762	702862
Staphylococcus_#_aureus_!_M0944_{_genomic_}_scaffold_acvqy-supercont1.1_whole_genome_shotgun_sequence|gi|486393915|ref|NZ_KB821779.1|	0.006	99.994	100	1631629	1631729
Staphylococcus_#_aureus_!_M0946_{_genomic_}_scaffold_acunJ-supercont1.2_whole_genome_shotgun_sequence|gi|487387889|ref|NZ_KB821787.1|	0.022	99.978	100	458388	458488
Staphylococcus_#_aureus_!_M0946_{_genomic_}_scaffold_acunJ-supercont1.4_whole_genome_shotgun_sequence|gi|487388014|ref|NZ_KB821789.1|	0.032	99.968	100	315113	315213
Staphylococcus_#_aureus_!_M0953_{_genomic_}_scaffold_acvql-supercont1.1_whole_genome_shotgun_sequence|gi|486396075|ref|NZ_KB821795.1|	0.24	99.76	100	41630	41730
Staphylococcus_#_aureus_!_M0953_{_genomic_}_scaffold_acvql-supercont1.2_whole_genome_shotgun_sequence|gi|486396452|ref|NZ_KB821796.1|	0.007	99.993	100	1420997	1421097
Staphylococcus_#_aureus_!_M0964_{_genomic_}_scaffold_aculV-supercont1.5_whole_genome_shotgun_sequence|gi|487388602|ref|NZ_KB821805.1|	0.008	99.992	100	1260051	1260151
Staphylococcus_#_aureus_!_M0994_{_genomic_}_scaffold_acunc-supercont1.3_whole_genome_shotgun_sequence|gi|487390907|ref|NZ_KB821811.1|	0.006	99.994	100	1689988	1690088
Staphylococcus_#_aureus_!_M1015_{_genomic_}_scaffold_acvqH-supercont1.5_whole_genome_shotgun_sequence|gi|486404951|ref|NZ_KB821838.1|	0.01	99.99	100	991924	992024
Staphylococcus_#_aureus_!_M1015_{_genomic_}_scaffold_acvqH-supercont1.7_whole_genome_shotgun_sequence|gi|486405285|ref|NZ_KB821840.1|	0.016	99.984	100	618449	618549
Staphylococcus_#_aureus_!_M1034_{_genomic_}_scaffold_acumn-supercont1.8_whole_genome_shotgun_sequence|gi|487391857|ref|NZ_KB821859.1|	0.019	99.981	100	517691	517791
Staphylococcus_#_aureus_!_M1044_{_genomic_}_scaffold_acumE-supercont1.11_whole_genome_shotgun_sequence|gi|487392161|ref|NZ_KB821873.1|	0.016	99.984	100	628539	628639
Staphylococcus_#_aureus_!_M1044_{_genomic_}_scaffold_acumE-supercont1.6_whole_genome_shotgun_sequence|gi|487392815|ref|NZ_KB821886.1|	0.016	99.984	100	628924	629024
Staphylococcus_#_aureus_!_M1061_{_genomic_}_scaffold_aculN-supercont1.1_whole_genome_shotgun_sequence|gi|487393271|ref|NZ_KB821890.1|	0.009	99.991	100	1117015	1117115
Staphylococcus_#_aureus_!_M1061_{_genomic_}_scaffold_aculN-supercont1.5_whole_genome_shotgun_sequence|gi|487393551|ref|NZ_KB821896.1|	0.21	99.79	100	47439	47539
Staphylococcus_#_aureus_!_M1063_{_genomic_}_scaffold_acumZ-supercont1.4_whole_genome_shotgun_sequence|gi|486416208|ref|NZ_KB821906.1|	0.006	99.994	100	1645962	1646062
Staphylococcus_#_aureus_!_M1063_{_genomic_}_scaffold_acumZ-supercont1.8_whole_genome_shotgun_sequence|gi|486416926|ref|NZ_KB821910.1|	0.015	99.985	100	678576	678676
Staphylococcus_#_aureus_!_M1068_{_genomic_}_scaffold_acunM-supercont1.3_whole_genome_shotgun_sequence|gi|487394470|ref|NZ_KB821929.1|	0.012	99.988	100	804863	804963
Staphylococcus_#_aureus_!_M1076_{_genomic_}_scaffold_acumq-supercont1.1_whole_genome_shotgun_sequence|gi|486417634|ref|NZ_KB821951.1|	0.007	99.993	100	1493460	1493560
Staphylococcus_#_aureus_!_M1078_{_genomic_}_scaffold_aculT-supercont1.2_whole_genome_shotgun_sequence|gi|487400778|ref|NZ_KB822363.1|	0.011	99.989	100	877372	877472
Staphylococcus_#_aureus_!_M1092_{_genomic_}_scaffold_acunK-supercont1.1_whole_genome_shotgun_sequence|gi|486421969|ref|NZ_KB821957.1|	0.008	99.992	100	1199071	1199171
Staphylococcus_#_aureus_!_M1095_{_genomic_}_scaffold_aculR-supercont1.4_whole_genome_shotgun_sequence|gi|486426334|ref|NZ_KB821982.1|	0.016	99.984	100	635587	635687
Staphylococcus_#_aureus_!_M1103_{_genomic_}_scaffold_acump-supercont1.1_whole_genome_shotgun_sequence|gi|486428532|ref|NZ_KB822034.1|	0.005	99.995	100	1963679	1963779
Staphylococcus_#_aureus_!_M1103_{_genomic_}_scaffold_acump-supercont1.5_whole_genome_shotgun_sequence|gi|486429182|ref|NZ_KB822038.1|	0.011	99.989	100	932075	932175
Staphylococcus_#_aureus_!_M1109_{_genomic_}_scaffold_acunD-supercont1.11_whole_genome_shotgun_sequence|gi|487395199|ref|NZ_KB822009.1|	0.056	99.944	100	177928	178028
Staphylococcus_#_aureus_!_M1109_{_genomic_}_scaffold_acunD-supercont1.3_whole_genome_shotgun_sequence|gi|487395342|ref|NZ_KB822014.1|	0.006	99.994	100	1585927	1586027
Staphylococcus_#_aureus_!_M1109_{_genomic_}_scaffold_acunD-supercont1.9_whole_genome_shotgun_sequence|gi|487395760|ref|NZ_KB822020.1|	0.209	99.791	100	47711	47811
Staphylococcus_#_aureus_!_M1119_{_genomic_}_scaffold_acunS-supercont1.1_whole_genome_shotgun_sequence|gi|486430214|ref|NZ_KB822021.1|	0.009	99.991	100	1071693	1071793
Staphylococcus_#_aureus_!_M1119_{_genomic_}_scaffold_acunS-supercont1.5_whole_genome_shotgun_sequence|gi|486431063|ref|NZ_KB822029.1|	0.015	99.985	100	648527	648627
Staphylococcus_#_aureus_!_M1170_{_genomic_}_scaffold_acume-supercont1.1_whole_genome_shotgun_sequence|gi|486434630|ref|NZ_KB822067.1|	0.003	99.997	100	2871149	2871249
Staphylococcus_#_aureus_!_M1193_{_genomic_}_scaffold_acunb-supercont1.1_whole_genome_shotgun_sequence|gi|487401055|ref|NZ_KB822373.1|	0.004	99.996	100	2844834	2844934
Staphylococcus_#_aureus_!_M1198_{_genomic_}_scaffold_acumf-supercont1.3_whole_genome_shotgun_sequence|gi|486436221|ref|NZ_KB822053.1|	0.006	99.994	100	1756181	1756281
Staphylococcus_#_aureus_!_M1199_{_genomic_}_scaffold_acunF-supercont1.1_whole_genome_shotgun_sequence|gi|486447954|ref|NZ_KB822062.1|	0.004	99.996	100	2322437	2322537
Staphylococcus_#_aureus_!_M1244_{_genomic_}_scaffold_acumu-supercont1.11_whole_genome_shotgun_sequence|gi|487396942|ref|NZ_KB822088.1|	0.016	99.984	100	606007	606107
Staphylococcus_#_aureus_!_M1244_{_genomic_}_scaffold_acumu-supercont1.3_whole_genome_shotgun_sequence|gi|487397020|ref|NZ_KB822092.1|	0.059	99.941	100	170755	170855
Staphylococcus_#_aureus_!_M1248_{_genomic_}_scaffold_acunw-supercont1.3_whole_genome_shotgun_sequence|gi|486648723|ref|NZ_KB822101.1|	0.013	99.987	100	741377	741477
Staphylococcus_#_aureus_!_M1253_{_genomic_}_scaffold_acunj-supercont1.1_whole_genome_shotgun_sequence|gi|486669659|ref|NZ_KB822112.1|	0.003	99.997	100	2883364	2883464
Staphylococcus_#_aureus_!_M1255_{_genomic_}_scaffold_acunA-supercont1.5_whole_genome_shotgun_sequence|gi|486688395|ref|NZ_KB822120.1|	0.057	99.943	100	174669	174769
Staphylococcus_#_aureus_!_M1255_{_genomic_}_scaffold_acunA-supercont1.7_whole_genome_shotgun_sequence|gi|486697825|ref|NZ_KB822122.1|	0.016	99.984	100	631047	631147
Staphylococcus_#_aureus_!_M1275_{_genomic_}_scaffold_acumX-supercont1.5_whole_genome_shotgun_sequence|gi|487397737|ref|NZ_KB822134.1|	0.004	99.996	100	2311943	2312043
Staphylococcus_#_aureus_!_M1309_{_genomic_}_scaffold_acunC-supercont1.3_whole_genome_shotgun_sequence|gi|487398415|ref|NZ_KB822158.1|	0.008	99.992	100	1229425	1229525
Staphylococcus_#_aureus_!_M1311_{_genomic_}_scaffold_aculZ-supercont1.6_whole_genome_shotgun_sequence|gi|486856699|ref|NZ_KB822180.1|	0.018	99.982	100	548682	548782
Staphylococcus_#_aureus_!_M1321_{_genomic_}_scaffold_acunh-supercont1.11_whole_genome_shotgun_sequence|gi|486895834|ref|NZ_KB822188.1|	0.016	99.984	100	630450	630550
Staphylococcus_#_aureus_!_M1321_{_genomic_}_scaffold_acunh-supercont1.6_whole_genome_shotgun_sequence|gi|486924102|ref|NZ_KB822196.1|	0.016	99.984	100	640859	640959
Staphylococcus_#_aureus_!_M1373_{_genomic_}_scaffold_acumD-supercont1.6_whole_genome_shotgun_sequence|gi|488719299|ref|NZ_KB822215.1|	0.129	99.871	100	77258	77358
Staphylococcus_#_aureus_!_M1407_{_genomic_}_scaffold_acuod-supercont1.1_whole_genome_shotgun_sequence|gi|487401530|ref|NZ_KB822379.1|	0.006	99.994	100	1618845	1618945
Staphylococcus_#_aureus_!_M1407_{_genomic_}_scaffold_acuod-supercont1.2_whole_genome_shotgun_sequence|gi|487401590|ref|NZ_KB822380.1|	0.012	99.988	100	841549	841649
Staphylococcus_#_aureus_!_M1450_{_genomic_}_scaffold_acumw-supercont1.3_whole_genome_shotgun_sequence|gi|487109353|ref|NZ_KB822234.1|	0.012	99.988	100	804459	804559
Staphylococcus_#_aureus_!_M1451_{_genomic_}_scaffold_acunE-supercont1.5_whole_genome_shotgun_sequence|gi|480459573|ref|NZ_KB822245.1|	0.011	99.989	100	909657	909757
Staphylococcus_#_aureus_!_M1462_{_genomic_}_scaffold_acumH-supercont1.2_whole_genome_shotgun_sequence|gi|487135374|ref|NZ_KB822551.1|	0.59	99.41	100	16862	16962
Staphylococcus_#_aureus_!_M1466_{_genomic_}_scaffold_acumV-supercont1.13_whole_genome_shotgun_sequence|gi|487401728|ref|NZ_KB822386.1|	0.016	99.984	100	630398	630498
Staphylococcus_#_aureus_!_M1466_{_genomic_}_scaffold_acumV-supercont1.1_whole_genome_shotgun_sequence|gi|487401652|ref|NZ_KB822382.1|	0.022	99.978	100	455237	455337
Staphylococcus_#_aureus_!_M1466_{_genomic_}_scaffold_acumV-supercont1.7_whole_genome_shotgun_sequence|gi|487401900|ref|NZ_KB822399.1|	0.008	99.992	100	1267344	1267444
Staphylococcus_#_aureus_!_M1510_{_genomic_}_scaffold_aculM-supercont1.5_whole_genome_shotgun_sequence|gi|487399617|ref|NZ_KB822261.1|	0.013	99.987	100	745636	745736
Staphylococcus_#_aureus_!_M1520_{_genomic_}_scaffold_acunp-supercont1.1_whole_genome_shotgun_sequence|gi|487137167|ref|NZ_KB822266.1|	0.004	99.996	100	2818714	2818814
Staphylococcus_#_aureus_!_M1521_{_genomic_}_scaffold_acunr-supercont1.4_whole_genome_shotgun_sequence|gi|487137439|ref|NZ_KB822271.1|	0.016	99.984	100	626351	626451
Staphylococcus_#_aureus_!_M1521_{_genomic_}_scaffold_acunr-supercont1.6_whole_genome_shotgun_sequence|gi|487137659|ref|NZ_KB822273.1|	0.006	99.994	100	1638950	1639050
Staphylococcus_#_aureus_!_M1531_{_genomic_}_scaffold_acunL-supercont1.2_whole_genome_shotgun_sequence|gi|487137933|ref|NZ_KB822264.1|	0.004	99.996	100	2385246	2385346
Staphylococcus_#_aureus_!_M1531_{_genomic_}_scaffold_acunL-supercont1.3_whole_genome_shotgun_sequence|gi|487137976|ref|NZ_KB822265.1|	0.218	99.782	100	45826	45926
Staphylococcus_#_aureus_!_M1533_{_genomic_}_scaffold_aculS-supercont1.5_whole_genome_shotgun_sequence|gi|487138449|ref|NZ_KB822289.1|	0.009	99.991	100	1074975	1075075
Staphylococcus_#_aureus_!_M1544_{_genomic_}_scaffold_acunm-supercont1.5_whole_genome_shotgun_sequence|gi|487139035|ref|NZ_KB822280.1|	0.014	99.986	100	699596	699696
Staphylococcus_#_aureus_!_M1556_{_genomic_}_scaffold_acund-supercont1.2_whole_genome_shotgun_sequence|gi|487139644|ref|NZ_KB822293.1|	0.014	99.986	100	729981	730081
Staphylococcus_#_aureus_!_M1563_{_genomic_}_scaffold_acuoe-supercont1.1_whole_genome_shotgun_sequence|gi|487146604|ref|NZ_KB822304.1|	0.014	99.986	100	708116	708216
Staphylococcus_#_aureus_!_M1563_{_genomic_}_scaffold_acuoe-supercont1.6_whole_genome_shotgun_sequence|gi|487166501|ref|NZ_KB822309.1|	0.023	99.977	100	438485	438585
Staphylococcus_#_aureus_!_M1565_{_genomic_}_scaffold_acunk-supercont1.1_whole_genome_shotgun_sequence|gi|487186501|ref|NZ_KB822299.1|	0.005	99.995	100	2209966	2210066
Staphylococcus_#_aureus_!_M1565_{_genomic_}_scaffold_acunk-supercont1.2_whole_genome_shotgun_sequence|gi|487189945|ref|NZ_KB822300.1|	0.016	99.984	100	626452	626552
Staphylococcus_#_aureus_!_plasmid_{_SAP077B_}_complete_sequence|gi|260667563|ref|NC_013341.1|	0.75	99.25	100	13242	13342
Staphylococcus_#_aureus_!_subsp._{_aureus_}_55/2053_genomic_scaffold_supercont1.15_whole_genome_shotgun_sequence|gi|257426198|ref|NZ_GG700547.1|	0.091	99.909	100	110172	110272
Staphylococcus_#_aureus_!_subsp._{_aureus_}_58-424_genomic_scaffold_supercont1.17_whole_genome_shotgun_sequence|gi|293508980|ref|NZ_GG749070.1|	0.091	99.909	100	110142	110242
Staphylococcus_#_aureus_!_subsp._{_aureus_}_65-1322_genomic_scaffold_supercont1.10_whole_genome_shotgun_sequence|gi|257428858|ref|NZ_GG700568.1|	0.091	99.909	100	109548	109648
Staphylococcus_#_aureus_!_subsp._{_aureus_}_68-397_genomic_scaffold_supercont1.15_whole_genome_shotgun_sequence|gi|257431468|ref|NZ_GG700588.1|	0.092	99.908	100	109134	109234
Staphylococcus_#_aureus_!_subsp._{_aureus_}_A017934/97_genomic_scaffold_supercont1.15_whole_genome_shotgun_sequence|gi|283958840|ref|NZ_GG731509.1|	0.09	99.91	100	111358	111458
Staphylococcus_#_aureus_!_subsp._{_aureus_}_ATCC_51811_genomic_scaffold_SCAFFOLD3_whole_genome_shotgun_sequence|gi|297210121|ref|NZ_GG774482.1|	0.077	99.923	100	130067	130167
Staphylococcus_#_aureus_!_subsp._{_aureus_}_Btn1260_genomic_scaffold_supercont1.11_whole_genome_shotgun_sequence|gi|282906406|ref|NZ_GG730266.1|	0.09	99.91	100	111111	111211
Staphylococcus_#_aureus_!_subsp._{_aureus_}_C101_genomic_scaffold_supercont1.17_whole_genome_shotgun_sequence|gi|282925449|ref|NZ_GG730136.1|	0.091	99.909	100	109736	109836
Staphylococcus_#_aureus_!_subsp._{_aureus_}_C160_genomic_scaffold_supercont1.21_whole_genome_shotgun_sequence|gi|282904727|ref|NZ_GG730293.1|	0.089	99.911	100	111711	111811
Staphylococcus_#_aureus_!_subsp._{_aureus_}_CM05_genomic_scaffold_Scfld368_whole_genome_shotgun_sequence|gi|424774881|ref|NZ_JH806555.1|	0.126	99.874	100	79580	79680
Staphylococcus_#_aureus_!_subsp._{_aureus_}_CM05_genomic_scaffold_Scfld490_whole_genome_shotgun_sequence|gi|424776183|ref|NZ_JH806563.1|	0.105	99.895	100	94891	94991
Staphylococcus_#_aureus_!_subsp._{_aureus_}_D139_genomic_scaffold_supercont1.13_whole_genome_shotgun_sequence|gi|282916185|ref|NZ_GG730171.1|	0.03	99.97	100	334557	334657
Staphylococcus_#_aureus_!_subsp._{_aureus_}_D139_genomic_scaffold_supercont1.22_whole_genome_shotgun_sequence|gi|282917409|ref|NZ_GG730180.1|	0.09	99.91	100	110708	110808
Staphylococcus_#_aureus_!_subsp._{_aureus_}_D139_genomic_scaffold_supercont1.25_whole_genome_shotgun_sequence|gi|282917720|ref|NZ_GG730183.1|	0.023	99.977	100	430592	430692
Staphylococcus_#_aureus_!_subsp._{_aureus_}_D139_genomic_scaffold_supercont1.3_whole_genome_shotgun_sequence|gi|282915419|ref|NZ_GG730161.1|	0.045	99.955	100	221730	221830
Staphylococcus_#_aureus_!_subsp._{_aureus_}_E1410_genomic_scaffold_supercont1.15_whole_genome_shotgun_sequence|gi|257434178|ref|NZ_GG700611.1|	0.092	99.908	100	108897	108997
Staphylococcus_#_aureus_!_subsp._{_aureus_}_EMRSA16_genomic_scaffold_supercont1.16_whole_genome_shotgun_sequence|gi|295428648|ref|NZ_GG770528.1|	0.089	99.911	100	112676	112776
Staphylococcus_#_aureus_!_subsp._{_aureus_}_EMRSA16_genomic_scaffold_supercont1.3_whole_genome_shotgun_sequence|gi|295426606|ref|NZ_GG770515.1|	0.022	99.978	100	454133	454233
Staphylococcus_#_aureus_!_subsp._{_aureus_}_H19_genomic_scaffold_supercont1.11_whole_genome_shotgun_sequence|gi|283771229|ref|NZ_GG730345.1|	0.091	99.909	100	109663	109763
Staphylococcus_#_aureus_!_subsp._{_aureus_}_M1015_genomic_scaffold_supercont1.16_whole_genome_shotgun_sequence|gi|293547492|ref|NZ_GG749011.1|	0.091	99.909	100	109550	109650
Staphylococcus_#_aureus_!_subsp._{_aureus_}_M809_genomic_scaffold_supercont1.20_whole_genome_shotgun_sequence|gi|293510892|ref|NZ_GG749318.1|	0.092	99.908	100	109006	109106
Staphylococcus_#_aureus_!_subsp._{_aureus_}_M876_genomic_scaffold_supercont1.13_whole_genome_shotgun_sequence|gi|257437091|ref|NZ_GG700626.1|	0.091	99.909	100	109428	109528
Staphylococcus_#_aureus_!_subsp._{_aureus_}_M876_genomic_scaffold_supercont1.9_whole_genome_shotgun_sequence|gi|257436456|ref|NZ_GG700622.1|	0.024	99.976	100	421798	421898
Staphylococcus_#_aureus_!_subsp._{_aureus_}_M899_genomic_scaffold_supercont1.14_whole_genome_shotgun_sequence|gi|282914906|ref|NZ_GG730203.1|	0.092	99.908	100	108866	108966
Staphylococcus_#_aureus_!_subsp._{_aureus_}_MRSA131_genomic_scaffold_Scfld253_whole_genome_shotgun_sequence|gi|422747121|ref|NZ_GL638191.1|	0.113	99.887	100	88540	88640
Staphylococcus_#_aureus_!_subsp._{_aureus_}_MRSA131_genomic_scaffold_Scfld78_whole_genome_shotgun_sequence|gi|422745396|ref|NZ_GL638174.1|	0.957	99.043	100	10350	10450
Staphylococcus_#_aureus_!_subsp._{_aureus_}_MRSA177_genomic_scaffold_Scfld14_whole_genome_shotgun_sequence|gi|422742133|ref|NZ_GL638200.1|	0.07	99.93	100	143382	143482
Staphylococcus_#_aureus_!_subsp._{_aureus_}_MRSA177_genomic_scaffold_Scfld384_whole_genome_shotgun_sequence|gi|422744230|ref|NZ_GL638236.1|	0.085	99.915	100	118093	118193
Staphylococcus_#_aureus_!_subsp._{_aureus_}_MRSA177_genomic_scaffold_Scfld42_whole_genome_shotgun_sequence|gi|422742527|ref|NZ_GL638205.1|	0.05	99.95	100	201418	201518
Staphylococcus_#_aureus_!_subsp._{_aureus_}_MRSA177_genomic_scaffold_Scfld43_whole_genome_shotgun_sequence|gi|422742736|ref|NZ_GL638206.1|	0.957	99.043	100	10350	10450
Staphylococcus_#_aureus_!_subsp._{_aureus_}_MRSA177_genomic_scaffold_Scfld56_whole_genome_shotgun_sequence|gi|422742934|ref|NZ_GL638211.1|	0.525	99.475	100	18949	19049
Staphylococcus_#_aureus_!_subsp._{_aureus_}_MRSA177_genomic_scaffold_Scfld78_whole_genome_shotgun_sequence|gi|422743378|ref|NZ_GL638219.1|	0.438	99.562	100	22751	22851
Staphylococcus_#_aureus_!_subsp._{_aureus_}_TCH130_genomic_scaffold_SCAFFOLD3_whole_genome_shotgun_sequence|gi|255925765|ref|NZ_GG698160.1|	0.024	99.976	100	418108	418208
Staphylococcus_#_aureus_!_subsp._{_aureus_}_TCH130_genomic_scaffold_SCAFFOLD5_whole_genome_shotgun_sequence|gi|255925767|ref|NZ_GG698162.1|	0.094	99.906	100	106754	106854
Staphylococcus_#_aureus_!_subsp._{_aureus_}_TCH130_genomic_scaffold_SCAFFOLD6_whole_genome_shotgun_sequence|gi|255925768|ref|NZ_GG698163.1|	0.09	99.91	100	110467	110567
Staphylococcus_#_aureus_!_subsp._{_aureus_}_USA300_TCH959_genomic_scaffold_SCAFFOLD4_whole_genome_shotgun_sequence|gi|255926320|ref|NZ_GG697988.1|	0.091	99.909	100	109674	109774
Staphylococcus_#_aureus_!_subsp._{_aureus_}_WBG10049_genomic_scaffold_supercont1.8_whole_genome_shotgun_sequence|gi|282911628|ref|NZ_GG730215.1|	0.091	99.909	100	109197	109297
Staphylococcus_#_aureus_!_subsp._{_aureus_}_WW2703/97_genomic_scaffold_supercont1.29_whole_genome_shotgun_sequence|gi|282909374|ref|NZ_GG730248.1|	0.088	99.912	100	113128	113228
Staphylococcus_#_aureus_!_subsp._{_aureus_}_WW2703/97_genomic_scaffold_supercont1.2_whole_genome_shotgun_sequence|gi|282907462|ref|NZ_GG730221.1|	0.031	99.969	100	323603	323703
Staphylococcus_#_aureus_!_subsp._{_aureus_}_WW2703/97_genomic_scaffold_supercont1.33_whole_genome_shotgun_sequence|gi|282909535|ref|NZ_GG730252.1|	0.185	99.815	100	53934	54034
Staphylococcus_#_caprae_!_C87_{_genomic_}_scaffold_supercont1.12_whole_genome_shotgun_sequence|gi|314934230|ref|NZ_GL545278.1|	0.011	99.989	100	884776	884876
Staphylococcus_#_caprae_!_C87_{_genomic_}_scaffold_supercont1.1_whole_genome_shotgun_sequence|gi|314932701|ref|NZ_GL545267.1|	0.252	99.748	100	39591	39691
Staphylococcus_#_caprae_!_C87_{_genomic_}_scaffold_supercont1.5_whole_genome_shotgun_sequence|gi|314932855|ref|NZ_GL545271.1|	0.042	99.958	100	240789	240889
Staphylococcus_#_caprae_!_C87_{_genomic_}_scaffold_supercont1.7_whole_genome_shotgun_sequence|gi|314934024|ref|NZ_GL545273.1|	13.089	86.911	100	664	764
Staphylococcus_#_epidermidis_!_APO27_{_genomic_}_scaffold_APO27_scaffold110_whole_genome_shotgun_sequence|gi|520956196|ref|NZ_KE365223.1|	0.576	99.424	100	17248	17348
Staphylococcus_#_epidermidis_!_APO35_{_genomic_}_scaffold_APO35_scaffold42_whole_genome_shotgun_sequence|gi|520973162|ref|NZ_KE365881.1|	0.3	99.7	100	33263	33363
Staphylococcus_#_epidermidis_!_BCM-HMP0060_{_genomic_}_scaffold_SCAFFOLD12_whole_genome_shotgun_sequence|gi|254281381|ref|NZ_GG696738.1|	0.253	99.747	100	39449	39549
Staphylococcus_#_epidermidis_!_BCM-HMP0060_{_genomic_}_scaffold_SCAFFOLD14_whole_genome_shotgun_sequence|gi|254281383|ref|NZ_GG696740.1|	6.41	93.59	100	1460	1560
Staphylococcus_#_epidermidis_!_BCM-HMP0060_{_genomic_}_scaffold_SCAFFOLD2_whole_genome_shotgun_sequence|gi|254281371|ref|NZ_GG696728.1|	0.007	99.993	100	1338886	1338986
Staphylococcus_#_epidermidis_!_BVS058A4_{_genomic_}_scaffold_supercont1.1_whole_genome_shotgun_sequence|gi|448879114|ref|NZ_KB373335.1|	0.008	99.992	100	1182690	1182790
Staphylococcus_#_epidermidis_!_BVS058A4_{_genomic_}_scaffold_supercont1.2_whole_genome_shotgun_sequence|gi|448879115|ref|NZ_KB373336.1|	0.012	99.988	100	842038	842138
Staphylococcus_#_epidermidis_!_BVS058A4_{_genomic_}_scaffold_supercont1.4_whole_genome_shotgun_sequence|gi|448879117|ref|NZ_KB373338.1|	0.103	99.897	100	97374	97474
Staphylococcus_#_epidermidis_!_CIM40_{_genomic_}_scaffold_CIM40_scaffold161_whole_genome_shotgun_sequence|gi|520974705|ref|NZ_KE366013.1|	37.313	62.687	100	168	268
Staphylococcus_#_epidermidis_!_CIM40_{_genomic_}_scaffold_CIM40_scaffold83_whole_genome_shotgun_sequence|gi|520975151|ref|NZ_KE366264.1|	0.225	99.775	100	44342	44442
Staphylococcus_#_epidermidis_!_M0881_{_genomic_}_scaffold_acumm-supercont1.2_whole_genome_shotgun_sequence|gi|489046772|ref|NZ_KB821722.1|	0.011	99.989	100	900369	900469
Staphylococcus_#_epidermidis_!_M23864:W1_{_genomic_}_scaffold_SCAFFOLD13_whole_genome_shotgun_sequence|gi|254213023|ref|NZ_GG696785.1|	0.253	99.747	100	39373	39473
Staphylococcus_#_epidermidis_!_M23864:W2(grey)_{_genomic_}_scaffold_SCAFFOLD2_whole_genome_shotgun_sequence|gi|293368504|ref|NZ_GG749256.1|	0.018	99.982	100	561344	561444
Staphylococcus_#_epidermidis_!_M23864:W2(grey)_{_genomic_}_scaffold_SCAFFOLD8_whole_genome_shotgun_sequence|gi|293368510|ref|NZ_GG749262.1|	0.253	99.747	100	39433	39533
Staphylococcus_#_epidermidis_!_MC16_{_genomic_}_scaffold_MC16_scaffold130_whole_genome_shotgun_sequence|gi|520975256|ref|NZ_KE369953.1|	0.314	99.686	100	31717	31817
Staphylococcus_#_epidermidis_!_MC19_{_genomic_}_scaffold_MC19_scaffold132_whole_genome_shotgun_sequence|gi|520976035|ref|NZ_KE370362.1|	0.245	99.755	100	40668	40768
Staphylococcus_#_epidermidis_!_MC28_{_genomic_}_scaffold_MC28_scaffold81_whole_genome_shotgun_sequence|gi|520977296|ref|NZ_KE366613.1|	0.262	99.738	100	38020	38120
Staphylococcus_#_epidermidis_!_Scl19_{_genomic_}_scaffold_Scl19_scaffold75_whole_genome_shotgun_sequence|gi|520977749|ref|NZ_KE366906.1|	0.245	99.755	100	40761	40861
Staphylococcus_#_epidermidis_!_Scl22_{_genomic_}_scaffold_Scl22_scaffold260_whole_genome_shotgun_sequence|gi|520978082|ref|NZ_KE367112.1|	0.969	99.031	100	10217	10317
Staphylococcus_#_epidermidis_!_Scl25_{_genomic_}_scaffold_Scl25_scaffold200_whole_genome_shotgun_sequence|gi|520978857|ref|NZ_KE367536.1|	31.646	68.354	100	216	316
Staphylococcus_#_epidermidis_!_Scl25_{_genomic_}_scaffold_Scl25_scaffold353_whole_genome_shotgun_sequence|gi|520979188|ref|NZ_KE367705.1|	0.634	99.366	100	15682	15782
Staphylococcus_#_epidermidis_!_Scl31_{_genomic_}_scaffold_Scl31_scaffold367_whole_genome_shotgun_sequence|gi|520979910|ref|NZ_KE368099.1|	31.646	68.354	100	216	316
Staphylococcus_#_epidermidis_!_Scl31_{_genomic_}_scaffold_Scl31_scaffold498_whole_genome_shotgun_sequence|gi|520980168|ref|NZ_KE368244.1|	44.843	55.157	100	123	223
Staphylococcus_#_epidermidis_!_Sentile1_{_genomic_}_scaffold_Sentile1_scaffold218_whole_genome_shotgun_sequence|gi|520980693|ref|NZ_KE368552.1|	2.588	97.412	100	3764	3864
Staphylococcus_#_epidermidis_!_Sentile2_{_genomic_}_scaffold_Sentile2_scaffold197_whole_genome_shotgun_sequence|gi|520981271|ref|NZ_KE368896.1|	0.554	99.446	100	17949	18049
Staphylococcus_#_epidermidis_!_W23144_{_genomic_}_scaffold_SCAFFOLD2_whole_genome_shotgun_sequence|gi|254212920|ref|NZ_GG696800.1|	0.015	99.985	100	650336	650436
Staphylococcus_#_epidermidis_!_W23144_{_genomic_}_scaffold_SCAFFOLD61_whole_genome_shotgun_sequence|gi|254212979|ref|NZ_GG696859.1|	31.847	68.153	100	214	314
Staphylococcus_#_epidermidis_!_W23144_{_genomic_}_scaffold_SCAFFOLD82_whole_genome_shotgun_sequence|gi|254213000|ref|NZ_GG696880.1|	42.017	57.983	100	138	238
Staphylococcus_#_epidermidis_!_WI05_{_genomic_}_scaffold_WI05_scaffold48_whole_genome_shotgun_sequence|gi|520982224|ref|NZ_KE369483.1|	0.277	99.723	100	35964	36064
Staphylococcus_#_epidermidis_!_WI09_{_genomic_}_scaffold_WI09_scaffold34_whole_genome_shotgun_sequence|gi|520982724|ref|NZ_KE369807.1|	0.537	99.463	100	18534	18634
Staphylococcus_#_hominis_!_subsp._{_hominis_}_C80_genomic_scaffold_supercont1.4_whole_genome_shotgun_sequence|gi|314935425|ref|NZ_GL545255.1|	0.021	99.979	100	480499	480599
Staphylococcus_#_lugdunensis_!_ACS-027-V-Sch2_{_genomic_}_scaffold_supercont1.1_whole_genome_shotgun_sequence|gi|448879133|ref|NZ_KB373322.1|	0.006	99.994	100	1764648	1764748
Staphylococcus_#_lugdunensis_!_M23590_{_genomic_}_scaffold_SCAFFOLD2_whole_genome_shotgun_sequence|gi|319430685|ref|NZ_GL622352.1|	0.01	99.99	100	1009887	1009987
Staphylococcus_#_simulans_!_ACS-120-V-Sch1_{_genomic_}_scaffold_supercont1.1_whole_genome_shotgun_sequence|gi|448879137|ref|NZ_KB373326.1|	0.01	99.99	100	1023031	1023131
Staphylococcus_#_sp._!_HGB0015_{_genomic_}_scaffold_aczIz-supercont1.2_whole_genome_shotgun_sequence|gi|512478261|ref|NZ_KE150418.1|	0.01	99.99	100	1006150	1006250
Staphylococcus_#_sp._!_HGB0015_{_genomic_}_scaffold_aczIz-supercont1.3_whole_genome_shotgun_sequence|gi|512478285|ref|NZ_KE150419.1|	0.242	99.758	100	41291	41391
Staphylococcus_#_aureus_!_subsp._{_aureus_}_E1410_genomic_scaffold_supercont1.10_whole_genome_shotgun_sequence|gi|257433958|ref|NZ_GG700606.1|	6.148	93.852	60	916	976

## Sheet: 1K
Organism	Genome_Coverage(%)	Genome_Not_Covered(%)	Genome_Coverage	Genome_Not_Covered	Genome_Size
Staphylococcus_#_aureus_!_subsp._{_aureus_}_USA300_FPR3757_chromosome_complete_genome|gi|87159884|ref|NC_007793.1|	3.557	96.443	102182	2770587	2872769
Staphylococcus_#_aureus_!_subsp._{_aureus_}_USA300_TCH1516_chromosome_complete_genome|gi|161508266|ref|NC_010079.1|	3.557	96.443	102182	2770733	2872915
Staphylococcus_#_aureus_!_subsp._{_aureus_}_COL_chromosome_complete_genome|gi|57650036|ref|NC_002951.2|	3.494	96.506	98162	2711260	2809422
Staphylococcus_#_aureus_!_subsp._{_aureus_}_str._Newman_chromosome_complete_genome|gi|151220212|ref|NC_009641.1|	3.391	96.609	97613	2781284	2878897
Staphylococcus_#_aureus_!_subsp._{_aureus_}_NCTC_8325_chromosome_complete_genome|gi|88193823|ref|NC_007795.1|	3.45	96.55	97329	2724032	2821361
Staphylococcus_#_aureus_!_subsp._{_aureus_}_VC40_chromosome_complete_genome|gi|379013365|ref|NC_016912.1|	3.552	96.448	95627	2596943	2692570
Staphylococcus_#_aureus_!_M1_{_complete_}_genome|gi|479328021|ref|NC_021059.1|	3.331	96.669	95396	2768729	2864125
Staphylococcus_#_aureus_!_subsp._{_aureus_}_MW2_complete_genome|gi|21281729|ref|NC_003923.1|	3.34	96.66	94210	2726252	2820462
Staphylococcus_#_aureus_!_Bmb9393_{_complete_}_genome|gi|521210823|ref|NC_021670.1|	3.157	96.843	94091	2886457	2980548
Staphylococcus_#_aureus_!_subsp._{_aureus_}_JH9_chromosome_complete_genome|gi|148266447|ref|NC_009487.1|	3.203	96.797	93104	2813596	2906700
Staphylococcus_#_aureus_!_subsp._{_aureus_}_11819-97_chromosome_complete_genome|gi|385780298|ref|NC_017351.1|	3.252	96.748	92571	2753975	2846546
Staphylococcus_#_aureus_!_subsp._{_aureus_}_N315_chromosome_complete_genome|gi|29165615|ref|NC_002745.2|	3.252	96.748	91524	2723292	2814816
Staphylococcus_#_aureus_!_subsp._{_aureus_}_ST228_complete_genome_isolate_10388|gi|470190315|ref|NC_020529.1|	3.289	96.711	90760	2668750	2759510
Staphylococcus_#_aureus_!_subsp._{_aureus_}_ST228_complete_genome_isolate_10497|gi|470217946|ref|NC_020564.1|	3.289	96.711	90760	2668752	2759512
Staphylococcus_#_aureus_!_subsp._{_aureus_}_ST228_complete_genome_isolate_15532|gi|470192280|ref|NC_020532.1|	3.289	96.711	90760	2669123	2759883
Staphylococcus_#_aureus_!_subsp._{_aureus_}_ST228_complete_genome_isolate_16035|gi|470194245|ref|NC_020533.1|	3.289	96.711	90760	2669075	2759835
Staphylococcus_#_aureus_!_subsp._{_aureus_}_ST228_complete_genome_isolate_18341|gi|470196211|ref|NC_020536.1|	3.289	96.711	90760	2668713	2759473
Staphylococcus_#_aureus_!_subsp._{_aureus_}_ST228_complete_genome_isolate_18412|gi|470198176|ref|NC_020537.1|	3.289	96.711	90760	2668503	2759263
Staphylococcus_#_aureus_!_subsp._{_aureus_}_ST228_complete_genome_isolate_16125|gi|470221770|ref|NC_020566.1|	3.285	96.715	90660	2668797	2759457
Staphylococcus_#_aureus_!_subsp._{_aureus_}_ST228_complete_genome_isolate_18583|gi|470223734|ref|NC_020568.1|	3.286	96.714	90660	2668668	2759328
Staphylococcus_#_aureus_!_subsp._{_aureus_}_ED98_complete_genome|gi|269201690|ref|NC_013450.1|	3.206	96.794	90553	2733851	2824404
Staphylococcus_#_aureus_!_subsp._{_aureus_}_TW20_complete_genome|gi|387141638|ref|NC_017331.1|	2.974	97.026	90501	2952709	3043210
Staphylococcus_#_aureus_!_subsp._{_aureus_}_MSSA476_chromosome_complete_genome|gi|49484912|ref|NC_002953.3|	3.23	96.77	90424	2709378	2799802
Staphylococcus_#_aureus_!_M0235_{_genomic_}_scaffold_acumc-supercont1.1_whole_genome_shotgun_sequence|gi|487361831|ref|NZ_KB821130.1|	3.189	96.811	90145	2736931	2827076
Staphylococcus_#_aureus_!_subsp._{_aureus_}_str._JKD6008_chromosome_complete_genome|gi|384860682|ref|NC_017341.1|	3.063	96.937	89569	2834775	2924344
Staphylococcus_#_aureus_!_subsp._{_aureus_}_T0131_chromosome_complete_genome|gi|384868588|ref|NC_017347.1|	3.057	96.943	89068	2824832	2913900
Staphylococcus_#_aureus_!_M1216_{_genomic_}_scaffold_acumJ-supercont-complete_whole_genome_shotgun_sequence|gi|493203888|ref|NZ_KB822075.1|	3.084	96.916	86149	2707226	2793375
Staphylococcus_#_aureus_!_subsp._{_aureus_}_JH1_chromosome_complete_genome|gi|150392480|ref|NC_009632.1|	2.824	97.176	82076	2824431	2906507
Staphylococcus_#_aureus_!_08BA02176_{_chromosome_}_complete_genome|gi|404477334|ref|NC_018608.1|	2.927	97.073	81447	2700866	2782313
Staphylococcus_#_aureus_!_subsp._{_aureus_}_ECT-R_2_complete_genome|gi|384863396|ref|NC_017343.1|	2.978	97.022	81297	2648243	2729540
Staphylococcus_#_aureus_!_04-02981_{_chromosome_}_complete_genome|gi|387149188|ref|NC_017340.1|	2.867	97.133	80883	2740569	2821452
Staphylococcus_#_aureus_!_CA-347_{_complete_}_genome|gi|514064966|ref|NC_021554.1|	2.829	97.171	80647	2769856	2850503
Staphylococcus_#_aureus_!_subsp._{_aureus_}_Mu50_chromosome_complete_genome|gi|57634611|ref|NC_002758.2|	2.796	97.204	80496	2798033	2878529
Staphylococcus_#_aureus_!_subsp._{_aureus_}_Mu3_complete_genome|gi|156978331|ref|NC_009782.1|	2.774	97.226	79896	2800272	2880168
Staphylococcus_#_aureus_!_subsp._{_aureus_}_HO_5096_0412_complete_genome|gi|386829725|ref|NC_017763.1|	2.664	97.336	75453	2756846	2832299
Staphylococcus_#_aureus_!_subsp._{_aureus_}_MRSA252_chromosome_complete_genome|gi|49482253|ref|NC_002952.2|	2.378	97.622	69024	2833595	2902619
Staphylococcus_#_aureus_!_subsp._{_aureus_}_LGA251_complete_genome|gi|387779217|ref|NC_017349.1|	2.398	97.602	65974	2684860	2750834
Staphylococcus_#_aureus_!_subsp._{_aureus_}_M013_chromosome_complete_genome|gi|379019812|ref|NC_016928.1|	2.285	97.715	63727	2724909	2788636
Staphylococcus_#_aureus_!_subsp._{_aureus_}_ST398_complete_genome|gi|387601291|ref|NC_017333.1|	2.174	97.826	62458	2810124	2872582
Staphylococcus_#_aureus_!_subsp._{_aureus_}_ED133_chromosome_complete_genome|gi|384546269|ref|NC_017337.1|	2.193	97.807	62130	2770348	2832478
Staphylococcus_#_aureus_!_subsp._{_aureus_}_JKD6159_chromosome_complete_genome|gi|384548923|ref|NC_017338.1|	2.202	97.798	61920	2749515	2811435
Staphylococcus_#_aureus_!_subsp._{_aureus_}_TCH60_chromosome_complete_genome|gi|384865886|ref|NC_017342.1|	2.152	97.848	60300	2742375	2802675
Staphylococcus_#_aureus_!_subsp._{_aureus_}_71193_chromosome_complete_genome|gi|386727822|ref|NC_017673.1|	2.217	97.783	60192	2654808	2715000
Staphylococcus_#_aureus_!_RF122_{_complete_}_genome|gi|82749777|ref|NC_007622.1|	2.141	97.859	58726	2683805	2742531
Staphylococcus_#_aureus_!_M0580_{_genomic_}_scaffold_acvrg-supercont1.2_whole_genome_shotgun_sequence|gi|486357261|ref|NZ_KB821487.1|	3.201	96.799	47088	1424095	1471183
Staphylococcus_#_aureus_!_M0326_{_genomic_}_scaffold_acrHf-supercont1.2_whole_genome_shotgun_sequence|gi|486268272|ref|NZ_KB821203.1|	3.236	96.764	39653	1185686	1225339
Staphylococcus_#_aureus_!_M1373_{_genomic_}_scaffold_acumD-supercont1.4_whole_genome_shotgun_sequence|gi|488719292|ref|NZ_KB822213.1|	3.194	96.806	38673	1172237	1210910
Staphylococcus_#_aureus_!_M1188_{_genomic_}_scaffold_acumb-supercont1.2_whole_genome_shotgun_sequence|gi|493196425|ref|NZ_KB822058.1|	3.057	96.943	37173	1178884	1216057
Staphylococcus_#_aureus_!_M0450_{_genomic_}_scaffold_acqwq-supercont1.3_whole_genome_shotgun_sequence|gi|486302842|ref|NZ_KB821345.1|	3.307	96.693	37068	1083795	1120863
Staphylococcus_#_aureus_!_M1188_{_genomic_}_scaffold_acumb-supercont1.4_whole_genome_shotgun_sequence|gi|493198238|ref|NZ_KB822060.1|	2.955	97.045	36400	1195319	1231719
Staphylococcus_#_aureus_!_M0173_{_genomic_}_scaffold_acrHj-supercont1.2_whole_genome_shotgun_sequence|gi|486253586|ref|NZ_KB821071.1|	3.229	96.771	34348	1029319	1063667
Staphylococcus_#_aureus_!_M0998_{_genomic_}_scaffold_acvqv-supercont1.6_whole_genome_shotgun_sequence|gi|486398674|ref|NZ_KB821818.1|	3.11	96.89	33503	1043830	1077333
Staphylococcus_#_aureus_!_M0823_{_genomic_}_scaffold_acvqk-supercont1.8_whole_genome_shotgun_sequence|gi|486383952|ref|NZ_KB821698.1|	3.429	96.571	30783	867034	897817
Staphylococcus_#_aureus_!_HI010_{_genomic_}_scaffold_acqxi-supercont1.1_whole_genome_shotgun_sequence|gi|486203361|ref|NZ_KB820894.1|	1.055	98.945	30317	2842045	2872362
Staphylococcus_#_aureus_!_M0769_{_genomic_}_scaffold_acvqF-supercont1.7_whole_genome_shotgun_sequence|gi|480448432|ref|NZ_KB821635.1|	3.297	96.703	30283	888091	918374
Staphylococcus_#_aureus_!_HI049C_{_genomic_}_scaffold_acqxH-supercont1.1_whole_genome_shotgun_sequence|gi|486211608|ref|NZ_KB820909.1|	1.033	98.967	29858	2859512	2889370
Staphylococcus_#_aureus_!_HI049B_{_genomic_}_scaffold_acqxg-supercont1.1_whole_genome_shotgun_sequence|gi|486205205|ref|NZ_KB820906.1|	1.023	98.977	29557	2859969	2889526
Staphylococcus_#_aureus_!_HI022_{_genomic_}_scaffold_acqwY-supercont1.1_whole_genome_shotgun_sequence|gi|486209995|ref|NZ_KB820903.1|	1.038	98.962	29257	2789612	2818869
Staphylococcus_#_aureus_!_M0695_{_genomic_}_scaffold_acunx-supercont1.4_whole_genome_shotgun_sequence|gi|489045023|ref|NZ_KB821609.1|	3.154	96.846	29038	891527	920565
Staphylococcus_#_aureus_!_M0531_{_genomic_}_scaffold_acvqQ-supercont1.1_whole_genome_shotgun_sequence|gi|486342614|ref|NZ_KB821438.1|	1.002	98.998	28457	2812817	2841274
Staphylococcus_#_aureus_!_HI111_{_genomic_}_scaffold_acqwe-supercont1.1_whole_genome_shotgun_sequence|gi|486214133|ref|NZ_KB820916.1|	1.001	98.999	28356	2804170	2832526
Staphylococcus_#_aureus_!_M1286_{_genomic_}_scaffold_acuob-supercont1.10_whole_genome_shotgun_sequence|gi|487397932|ref|NZ_KB822142.1|	3.478	96.522	27483	762821	790304
Staphylococcus_#_aureus_!_M0695_{_genomic_}_scaffold_acunx-supercont1.18_whole_genome_shotgun_sequence|gi|489044982|ref|NZ_KB821605.1|	3.379	96.621	26983	771598	798581
Staphylococcus_#_aureus_!_M0312_{_genomic_}_scaffold_acqxO-supercont1.1_whole_genome_shotgun_sequence|gi|487376936|ref|NZ_KB821215.1|	0.889	99.111	26159	2917576	2943735
Staphylococcus_#_aureus_!_M0831_{_genomic_}_scaffold_acumY-supercont-complete_whole_genome_shotgun_sequence|gi|487384247|ref|NZ_KB821688.1|	0.881	99.119	26058	2931723	2957781
Staphylococcus_#_aureus_!_M0055_{_genomic_}_scaffold_acumI-supercont1.1_whole_genome_shotgun_sequence|gi|487290252|ref|NZ_KB820976.1|	0.88	99.12	25758	2901081	2926839
Staphylococcus_#_aureus_!_M0468_{_genomic_}_scaffold_acqxk-supercont1.2_whole_genome_shotgun_sequence|gi|486310012|ref|NZ_KB821359.1|	0.871	99.129	25658	2918522	2944180
Staphylococcus_#_aureus_!_M0221_{_genomic_}_scaffold_acqxa-supercont1.2_whole_genome_shotgun_sequence|gi|486259720|ref|NZ_KB821124.1|	0.89	99.11	25558	2846561	2872119
Staphylococcus_#_aureus_!_HIF003_B2N-C_{_genomic_}_scaffold_acqxV-supercont1.1_whole_genome_shotgun_sequence|gi|486209139|ref|NZ_KB820925.1|	0.913	99.087	25158	2729838	2754996
Staphylococcus_#_aureus_!_M0340_{_genomic_}_scaffold_acqxN-supercont1.2_whole_genome_shotgun_sequence|gi|486280931|ref|NZ_KB821242.1|	0.906	99.094	24759	2708178	2732937
Staphylococcus_#_aureus_!_subsp._{_aureus_}_55/2053_genomic_scaffold_supercont1.1_whole_genome_shotgun_sequence|gi|257423656|ref|NZ_GG700533.1|	2.142	97.858	21990	1004836	1026826
Staphylococcus_#_aureus_!_subsp._{_aureus_}_ATCC_BAA-39_genomic_scaffold_SCAFFOLD1_whole_genome_shotgun_sequence|gi|305431397|ref|NZ_GL397103.1|	0.721	99.279	20907	2879205	2900112
Staphylococcus_#_aureus_!_M1462_{_genomic_}_scaffold_acumH-supercont1.3_whole_genome_shotgun_sequence|gi|487135576|ref|NZ_KB822552.1|	0.863	99.137	20805	2390760	2411565
Staphylococcus_#_aureus_!_M0695_{_genomic_}_scaffold_acunx-supercont1.5_whole_genome_shotgun_sequence|gi|489045039|ref|NZ_KB821610.1|	3.597	96.403	20581	551664	572245
Staphylococcus_#_aureus_!_M1015_{_genomic_}_scaffold_acvqH-supercont1.4_whole_genome_shotgun_sequence|gi|486404434|ref|NZ_KB821837.1|	2.996	97.004	17774	575426	593200
Staphylococcus_#_aureus_!_M0602_{_genomic_}_scaffold_acvqp-supercont1.2_whole_genome_shotgun_sequence|gi|486358344|ref|NZ_KB821494.1|	3.126	96.874	17674	547784	565458
Staphylococcus_#_aureus_!_HI049_{_genomic_}_scaffold_acqxW-supercont1.1_whole_genome_shotgun_sequence|gi|486200690|ref|NZ_KB820912.1|	0.998	99.002	17302	1716976	1734278
Staphylococcus_#_aureus_!_HI168_{_genomic_}_scaffold_acqxp-supercont1.3_whole_genome_shotgun_sequence|gi|486213000|ref|NZ_KB820921.1|	0.97	99.03	17102	1745957	1763059
Staphylococcus_#_aureus_!_HI013_{_genomic_}_scaffold_acqwl-supercont1.2_whole_genome_shotgun_sequence|gi|486215615|ref|NZ_KB820899.1|	0.997	99.003	16602	1648321	1664923
Staphylococcus_#_aureus_!_M1223_{_genomic_}_scaffold_acune-supercont1.3_whole_genome_shotgun_sequence|gi|487396419|ref|NZ_KB822073.1|	0.888	99.112	14802	1651799	1666601
Staphylococcus_#_aureus_!_subsp._{_aureus_}_TCH70_genomic_scaffold_SCAFFOLD1_whole_genome_shotgun_sequence|gi|311744845|ref|NZ_GL538356.1|	0.53	99.47	14764	2771814	2786578
Staphylococcus_#_aureus_!_M1007_{_genomic_}_scaffold_acvqZ-supercont1.3_whole_genome_shotgun_sequence|gi|486401503|ref|NZ_KB821831.1|	0.872	99.128	14603	1660837	1675440
Staphylococcus_#_aureus_!_M0177_{_genomic_}_scaffold_acumi-supercont1.1_whole_genome_shotgun_sequence|gi|487359982|ref|NZ_KB821078.1|	3.251	96.749	14185	422206	436391
Staphylococcus_#_aureus_!_M0424_{_genomic_}_scaffold_acunn-supercont1.3_whole_genome_shotgun_sequence|gi|487368144|ref|NZ_KB821339.1|	0.925	99.075	13904	1489137	1503041
Staphylococcus_#_aureus_!_M0633_{_genomic_}_scaffold_acyCm-supercont1.2_whole_genome_shotgun_sequence|gi|487371925|ref|NZ_KB821508.1|	0.933	99.067	13904	1476420	1490324
Staphylococcus_#_aureus_!_M1064_{_genomic_}_scaffold_acumU-supercont1.6_whole_genome_shotgun_sequence|gi|486420802|ref|NZ_KB821942.1|	0.922	99.078	13804	1483963	1497767
Staphylococcus_#_aureus_!_M1188_{_genomic_}_scaffold_acumb-supercont1.3_whole_genome_shotgun_sequence|gi|493196995|ref|NZ_KB822059.1|	3.246	96.754	13294	396283	409577
Staphylococcus_#_aureus_!_HI013_{_genomic_}_scaffold_acqwl-supercont1.1_whole_genome_shotgun_sequence|gi|486215046|ref|NZ_KB820898.1|	1.077	98.923	12255	1125106	1137361
Staphylococcus_#_aureus_!_HI049_{_genomic_}_scaffold_acqxW-supercont1.2_whole_genome_shotgun_sequence|gi|486202079|ref|NZ_KB820913.1|	1.069	98.931	12155	1125244	1137399
Staphylococcus_#_aureus_!_HI168_{_genomic_}_scaffold_acqxp-supercont1.1_whole_genome_shotgun_sequence|gi|486212462|ref|NZ_KB820919.1|	1.109	98.891	12155	1083483	1095638
Staphylococcus_#_aureus_!_M0328_{_genomic_}_scaffold_acrGR-supercont1.1_whole_genome_shotgun_sequence|gi|486271607|ref|NZ_KB821211.1|	3.402	96.598	12072	342780	354852
Staphylococcus_#_aureus_!_M0239_{_genomic_}_scaffold_acqxh-supercont1.1_whole_genome_shotgun_sequence|gi|486264624|ref|NZ_KB821128.1|	0.427	99.573	11656	2714905	2726561
Staphylococcus_#_aureus_!_M0424_{_genomic_}_scaffold_acunn-supercont1.1_whole_genome_shotgun_sequence|gi|487367914|ref|NZ_KB821337.1|	0.963	99.037	10755	1106250	1117005
Staphylococcus_#_aureus_!_subsp._{_aureus_}_MSHR1132_complete_genome|gi|379794527|ref|NC_016941.1|	0.38	99.62	10487	2752298	2762785
Staphylococcus_#_aureus_!_M1007_{_genomic_}_scaffold_acvqZ-supercont1.1_whole_genome_shotgun_sequence|gi|486400527|ref|NZ_KB821829.1|	0.923	99.077	10256	1100638	1110894
Staphylococcus_#_aureus_!_M1223_{_genomic_}_scaffold_acune-supercont1.1_whole_genome_shotgun_sequence|gi|487396341|ref|NZ_KB822071.1|	0.877	99.123	10255	1159182	1169437
Staphylococcus_#_aureus_!_M0513_{_genomic_}_scaffold_acumP-supercont-complete_whole_genome_shotgun_sequence|gi|487369849|ref|NZ_KB821413.1|	0.321	99.679	9404	2923446	2932850
Staphylococcus_#_aureus_!_subsp._{_aureus_}_MN8_chromosome_whole_genome_shotgun_sequence|gi|298527634|ref|NZ_CM000952.1|	0.314	99.686	9104	2890484	2899588
Staphylococcus_#_aureus_!_subsp._{_aureus_}_M809_genomic_scaffold_supercont1.8_whole_genome_shotgun_sequence|gi|293509340|ref|NZ_GG749306.1|	2.138	97.862	8561	391865	400426
Staphylococcus_#_aureus_!_M0396_{_genomic_}_scaffold_acunf-supercont1.4_whole_genome_shotgun_sequence|gi|487367492|ref|NZ_KB821299.1|	0.528	99.472	8403	1583868	1592271
Staphylococcus_#_aureus_!_M1373_{_genomic_}_scaffold_acumD-supercont1.7_whole_genome_shotgun_sequence|gi|488719319|ref|NZ_KB822216.1|	2.734	97.266	8201	291747	299948
Staphylococcus_#_aureus_!_M1228_{_genomic_}_scaffold_acunW-supercont1.2_whole_genome_shotgun_sequence|gi|487401372|ref|NZ_KB822377.1|	0.508	99.492	7965	1560046	1568011
Staphylococcus_#_aureus_!_M1064_{_genomic_}_scaffold_acumU-supercont1.1_whole_genome_shotgun_sequence|gi|486419252|ref|NZ_KB821934.1|	0.871	99.129	7851	893515	901366
Staphylococcus_#_aureus_!_M0695_{_genomic_}_scaffold_acunx-supercont1.1_whole_genome_shotgun_sequence|gi|489044929|ref|NZ_KB821596.1|	2.446	97.554	7740	308728	316468
Staphylococcus_#_aureus_!_subsp._{_aureus_}_ATCC_51811_genomic_scaffold_SCAFFOLD1_whole_genome_shotgun_sequence|gi|297210119|ref|NZ_GG774480.1|	0.537	99.463	7513	1392792	1400305
Staphylococcus_#_aureus_!_subsp._{_aureus_}_LCT-SA112_Scaffold1_whole_genome_shotgun_sequence|gi|452721112|ref|NZ_JH691956.1|	0.257	99.743	7104	2752327	2759431
Staphylococcus_#_aureus_!_M1373_{_genomic_}_scaffold_acumD-supercont1.5_whole_genome_shotgun_sequence|gi|488719293|ref|NZ_KB822214.1|	3.012	96.988	6788	218549	225337
Staphylococcus_#_aureus_!_subsp._{_aureus_}_USA300_TCH959_genomic_scaffold_SCAFFOLD1_whole_genome_shotgun_sequence|gi|255926317|ref|NZ_GG697985.1|	0.458	99.542	6403	1392383	1398786
Staphylococcus_#_aureus_!_M1255_{_genomic_}_scaffold_acunA-supercont1.5_whole_genome_shotgun_sequence|gi|486688395|ref|NZ_KB822120.1|	3.372	96.628	5893	168876	174769
Staphylococcus_#_aureus_!_M0633_{_genomic_}_scaffold_acyCm-supercont1.4_whole_genome_shotgun_sequence|gi|487372090|ref|NZ_KB821510.1|	0.893	99.107	5802	643887	649689
Staphylococcus_#_aureus_!_subsp._{_aureus_}_ATCC_51811_genomic_scaffold_SCAFFOLD2_whole_genome_shotgun_sequence|gi|297210120|ref|NZ_GG774481.1|	0.434	99.566	4952	1137259	1142211
Staphylococcus_#_aureus_!_M1256_{_genomic_}_scaffold_acunO-supercont1.2_whole_genome_shotgun_sequence|gi|487397459|ref|NZ_KB822115.1|	0.336	99.664	4803	1424425	1429228
Staphylococcus_#_aureus_!_M0633_{_genomic_}_scaffold_acyCm-supercont1.1_whole_genome_shotgun_sequence|gi|487371765|ref|NZ_KB821507.1|	0.889	99.111	4753	529767	534520
Staphylococcus_#_aureus_!_M1462_{_genomic_}_scaffold_acumH-supercont1.1_whole_genome_shotgun_sequence|gi|487135346|ref|NZ_KB822550.1|	0.938	99.062	4753	502185	506938
Staphylococcus_#_warneri_!_SG1_{_complete_}_genome|gi|445058371|ref|NC_020164.1|	0.189	99.811	4695	2481347	2486042
Staphylococcus_#_aureus_!_subsp._{_aureus_}_MRSA131_genomic_scaffold_Scfld83_whole_genome_shotgun_sequence|gi|422745409|ref|NZ_GL638175.1|	0.922	99.078	4502	483875	488377
Staphylococcus_#_aureus_!_M1309_{_genomic_}_scaffold_acunC-supercont1.6_whole_genome_shotgun_sequence|gi|487398463|ref|NZ_KB822161.1|	3.736	96.264	4408	113566	117974
Staphylococcus_#_aureus_!_subsp._{_aureus_}_MRSA131_genomic_scaffold_Scfld122_whole_genome_shotgun_sequence|gi|422746016|ref|NZ_GL638181.1|	1.274	98.726	4403	341116	345519
Staphylococcus_#_aureus_!_subsp._{_aureus_}_Btn1260_genomic_scaffold_supercont1.7_whole_genome_shotgun_sequence|gi|282905315|ref|NZ_GG730262.1|	0.423	99.577	4303	1013984	1018287
Staphylococcus_#_aureus_!_M1228_{_genomic_}_scaffold_acunW-supercont1.1_whole_genome_shotgun_sequence|gi|487401221|ref|NZ_KB822376.1|	0.345	99.655	4252	1227775	1232027
Staphylococcus_#_aureus_!_M0408_{_genomic_}_scaffold_acrHk-supercont1.4_whole_genome_shotgun_sequence|gi|486296790|ref|NZ_KB821329.1|	0.369	99.631	4102	1108402	1112504
Staphylococcus_#_aureus_!_subsp._{_aureus_}_H19_genomic_scaffold_supercont1.8_whole_genome_shotgun_sequence|gi|283769672|ref|NZ_GG730342.1|	0.289	99.711	4001	1382334	1386335
Staphylococcus_#_aureus_!_subsp._{_aureus_}_58-424_genomic_scaffold_supercont1.6_whole_genome_shotgun_sequence|gi|293500395|ref|NZ_GG749059.1|	0.387	99.613	3902	1003173	1007075
Staphylococcus_#_aureus_!_subsp._{_aureus_}_C427_genomic_scaffold_supercont1.8_whole_genome_shotgun_sequence|gi|282918694|ref|NZ_GG730148.1|	0.381	99.619	3803	993307	997110
Staphylococcus_#_aureus_!_subsp._{_aureus_}_EMRSA16_genomic_scaffold_supercont1.10_whole_genome_shotgun_sequence|gi|295427484|ref|NZ_GG770522.1|	0.483	99.517	3802	783555	787357
Staphylococcus_#_aureus_!_subsp._{_aureus_}_USA300_TCH959_genomic_scaffold_SCAFFOLD2_whole_genome_shotgun_sequence|gi|255926318|ref|NZ_GG697986.1|	0.373	99.627	3801	1014446	1018247
Staphylococcus_#_aureus_!_M0946_{_genomic_}_scaffold_acunJ-supercont1.6_whole_genome_shotgun_sequence|gi|487388144|ref|NZ_KB821791.1|	0.465	99.535	3702	792644	796346
Staphylococcus_#_aureus_!_M0695_{_genomic_}_scaffold_acunx-supercont1.2_whole_genome_shotgun_sequence|gi|489044993|ref|NZ_KB821607.1|	2.25	97.75	3701	160792	164493
Staphylococcus_#_aureus_!_M1034_{_genomic_}_scaffold_acumn-supercont1.7_whole_genome_shotgun_sequence|gi|487391726|ref|NZ_KB821858.1|	0.421	99.579	3701	874638	878339
Staphylococcus_#_aureus_!_M0877_{_genomic_}_scaffold_acumt-supercont1.5_whole_genome_shotgun_sequence|gi|487385357|ref|NZ_KB821718.1|	0.259	99.741	3601	1385960	1389561
Staphylococcus_#_aureus_!_subsp._{_aureus_}_65-1322_genomic_scaffold_supercont1.6_whole_genome_shotgun_sequence|gi|257427710|ref|NZ_GG700564.1|	0.349	99.651	3503	1001384	1004887
Staphylococcus_#_aureus_!_subsp._{_aureus_}_C160_genomic_scaffold_supercont1.7_whole_genome_shotgun_sequence|gi|282903541|ref|NZ_GG730279.1|	0.349	99.651	3403	971557	974960
Staphylococcus_#_pseudintermedius_!_HKU10-03_{_chromosome_}_complete_genome|gi|319891290|ref|NC_014925.1|	0.126	99.874	3307	2614074	2617381
Staphylococcus_#_aureus_!_subsp._{_aureus_}_TCH130_genomic_scaffold_SCAFFOLD1_whole_genome_shotgun_sequence|gi|255925763|ref|NZ_GG698158.1|	0.478	99.522	3301	687121	690422
Staphylococcus_#_aureus_!_M0396_{_genomic_}_scaffold_acunf-supercont1.2_whole_genome_shotgun_sequence|gi|487367086|ref|NZ_KB821297.1|	0.425	99.575	3152	737715	740867
Staphylococcus_#_aureus_!_subsp._{_aureus_}_A017934/97_genomic_scaffold_supercont1.9_whole_genome_shotgun_sequence|gi|283957738|ref|NZ_GG731503.1|	0.318	99.682	3103	971909	975012
Staphylococcus_#_aureus_!_subsp._{_aureus_}_MRSA177_genomic_scaffold_Scfld582_whole_genome_shotgun_sequence|gi|422744652|ref|NZ_GL638246.1|	0.977	99.023	3047	308903	311950
Staphylococcus_#_aureus_!_subsp._{_aureus_}_E1410_genomic_scaffold_supercont1.7_whole_genome_shotgun_sequence|gi|257433049|ref|NZ_GG700603.1|	0.302	99.698	3003	991880	994883
Staphylococcus_#_aureus_!_M1311_{_genomic_}_scaffold_aculZ-supercont1.3_whole_genome_shotgun_sequence|gi|486835574|ref|NZ_KB822177.1|	0.224	99.776	2902	1291010	1293912
Staphylococcus_#_aureus_!_subsp._{_aureus_}_MRSA131_genomic_scaffold_Scfld545_whole_genome_shotgun_sequence|gi|422747480|ref|NZ_GL638198.1|	0.984	99.016	2902	291990	294892
Staphylococcus_#_aureus_!_M0877_{_genomic_}_scaffold_acumt-supercont1.2_whole_genome_shotgun_sequence|gi|487385040|ref|NZ_KB821715.1|	0.262	99.738	2802	1065880	1068682
Staphylococcus_#_aureus_!_subsp._{_aureus_}_MRSA177_genomic_scaffold_Scfld173_whole_genome_shotgun_sequence|gi|422743415|ref|NZ_GL638224.1|	0.895	99.105	2801	310070	312871
Staphylococcus_#_aureus_!_subsp._{_aureus_}_MRSA131_genomic_scaffold_Scfld179_whole_genome_shotgun_sequence|gi|422746581|ref|NZ_GL638183.1|	1.075	98.925	2747	252732	255479
Staphylococcus_#_pseudintermedius_!_ED99_{_chromosome_}_complete_genome|gi|386318029|ref|NC_017568.1|	0.105	99.895	2706	2569510	2572216
Staphylococcus_#_aureus_!_subsp._{_aureus_}_MRSA131_genomic_scaffold_Scfld482_whole_genome_shotgun_sequence|gi|422747280|ref|NZ_GL638197.1|	1.398	98.602	2704	190688	193392
Staphylococcus_#_aureus_!_M1256_{_genomic_}_scaffold_acunO-supercont1.1_whole_genome_shotgun_sequence|gi|487397331|ref|NZ_KB822114.1|	0.197	99.803	2701	1371195	1373896
Staphylococcus_#_aureus_!_subsp._{_aureus_}_MRSA177_genomic_scaffold_Scfld252_whole_genome_shotgun_sequence|gi|422743901|ref|NZ_GL638230.1|	1.879	98.121	2701	141050	143751
Staphylococcus_#_aureus_!_subsp._{_aureus_}_TCH130_genomic_scaffold_SCAFFOLD3_whole_genome_shotgun_sequence|gi|255925765|ref|NZ_GG698160.1|	0.646	99.354	2700	415508	418208
Staphylococcus_#_aureus_!_M0326_{_genomic_}_scaffold_acrHf-supercont1.7_whole_genome_shotgun_sequence|gi|486269445|ref|NZ_KB821208.1|	2.895	97.105	2629	88191	90820
Staphylococcus_#_aureus_!_subsp._{_aureus_}_TCH130_genomic_scaffold_SCAFFOLD2_whole_genome_shotgun_sequence|gi|255925764|ref|NZ_GG698159.1|	0.41	99.59	2603	632165	634768
Staphylococcus_#_haemolyticus_!_JCSC1435_{_chromosome_}_complete_genome|gi|70725001|ref|NC_007168.1|	0.095	99.905	2560	2682455	2685015
Staphylococcus_#_aureus_!_M1064_{_genomic_}_scaffold_acumU-supercont1.3_whole_genome_shotgun_sequence|gi|486419946|ref|NZ_KB821939.1|	1.085	98.915	2504	228361	230865
Staphylococcus_#_aureus_!_M0695_{_genomic_}_scaffold_acunx-supercont1.3_whole_genome_shotgun_sequence|gi|489044994|ref|NZ_KB821608.1|	5.403	94.597	2445	42805	45250
Staphylococcus_#_aureus_!_subsp._{_aureus_}_68-397_genomic_scaffold_supercont1.6_whole_genome_shotgun_sequence|gi|257430345|ref|NZ_GG700579.1|	0.414	99.586	2402	577220	579622
Staphylococcus_#_aureus_!_subsp._{_aureus_}_M876_genomic_scaffold_supercont1.6_whole_genome_shotgun_sequence|gi|257435946|ref|NZ_GG700619.1|	0.418	99.582	2402	572482	574884
Staphylococcus_#_aureus_!_subsp._{_aureus_}_M899_genomic_scaffold_supercont1.7_whole_genome_shotgun_sequence|gi|282913769|ref|NZ_GG730196.1|	0.417	99.583	2402	573721	576123
Staphylococcus_#_saprophyticus_!_subsp._{_saprophyticus_}_ATCC_15305_complete_genome|gi|73661309|ref|NC_007350.1|	0.095	99.905	2396	2514179	2516575
Staphylococcus_#_epidermidis_!_RP62A_{_complete_}_genome|gi|57865352|ref|NC_002976.3|	0.091	99.909	2370	2614160	2616530
Staphylococcus_#_aureus_!_subsp._{_aureus_}_E1410_genomic_scaffold_supercont1.2_whole_genome_shotgun_sequence|gi|257431621|ref|NZ_GG700598.1|	0.223	99.777	2361	1055265	1057626
Staphylococcus_#_aureus_!_M1253_{_genomic_}_scaffold_acunj-supercont1.1_whole_genome_shotgun_sequence|gi|486669659|ref|NZ_KB822112.1|	0.08	99.92	2301	2881163	2883464
Staphylococcus_#_aureus_!_M1373_{_genomic_}_scaffold_acumD-supercont1.6_whole_genome_shotgun_sequence|gi|488719299|ref|NZ_KB822215.1|	2.974	97.026	2301	75057	77358
Staphylococcus_#_aureus_!_subsp._{_aureus_}_WBG10049_genomic_scaffold_supercont1.5_whole_genome_shotgun_sequence|gi|282910944|ref|NZ_GG730212.1|	0.374	99.626	2202	586364	588566
Staphylococcus_#_aureus_!_M0035_{_genomic_}_scaffold_acqxl-supercont1.2_whole_genome_shotgun_sequence|gi|486228657|ref|NZ_KB820966.1|	0.077	99.923	2201	2858594	2860795
Staphylococcus_#_aureus_!_M0408_{_genomic_}_scaffold_acrHk-supercont1.1_whole_genome_shotgun_sequence|gi|486293955|ref|NZ_KB821326.1|	0.182	99.818	2201	1205522	1207723
Staphylococcus_#_aureus_!_subsp._{_aureus_}_H19_genomic_scaffold_supercont1.2_whole_genome_shotgun_sequence|gi|283767263|ref|NZ_GG730336.1|	0.216	99.784	2201	1017750	1019951
Bacillus_#_megaterium_!_DSM_{_319_}_chromosome_complete_genome|gi|295702242|ref|NC_014103.1|	0.043	99.957	2200	5095247	5097447
Bacillus_#_megaterium_!_QM_{_B1551_}_chromosome_complete_genome|gi|294496875|ref|NC_014019.1|	0.043	99.957	2200	5094929	5097129
Macrococcus_#_caseolyticus_!_JCSC5402_{_complete_}_genome|gi|222150250|ref|NC_011999.1|	0.103	99.897	2168	2100156	2102324
Bacillus_#_coagulans_!_36D1_{_chromosome_}_complete_genome|gi|347750441|ref|NC_016023.1|	0.056	99.944	2000	3550226	3552226
Staphylococcus_#_aureus_!_subsp._{_aureus_}_D139_genomic_scaffold_supercont1.17_whole_genome_shotgun_sequence|gi|282916507|ref|NZ_GG730175.1|	0.273	99.727	1901	694972	696873
Staphylococcus_#_aureus_!_M1034_{_genomic_}_scaffold_acumn-supercont1.1_whole_genome_shotgun_sequence|gi|487391239|ref|NZ_KB821848.1|	0.188	99.812	1900	1007336	1009236
Staphylococcus_#_epidermidis_!_ATCC_{_12228_}_chromosome_complete_genome|gi|27466918|ref|NC_004461.1|	0.076	99.924	1900	2497379	2499279
Staphylococcus_#_aureus_!_M0424_{_genomic_}_scaffold_acunn-supercont1.4_whole_genome_shotgun_sequence|gi|487368234|ref|NZ_KB821340.1|	0.639	99.361	1899	295184	297083
Staphylococcus_#_aureus_!_M0494_{_genomic_}_scaffold_acqyb-supercont1.1_whole_genome_shotgun_sequence|gi|486320731|ref|NZ_KB821405.1|	0.065	99.935	1801	2781501	2783302
Staphylococcus_#_aureus_!_M0536_{_genomic_}_scaffold_acvqu-supercont1.3_whole_genome_shotgun_sequence|gi|486345866|ref|NZ_KB821468.1|	0.083	99.917	1801	2174010	2175811
Staphylococcus_#_aureus_!_M1367_{_genomic_}_scaffold_acumK-supercont1.2_whole_genome_shotgun_sequence|gi|487027023|ref|NZ_KB822208.1|	0.063	99.937	1801	2872655	2874456
Staphylococcus_#_aureus_!_subsp._{_aureus_}_Btn1260_genomic_scaffold_supercont1.14_whole_genome_shotgun_sequence|gi|282906513|ref|NZ_GG730269.1|	0.175	99.825	1801	1026378	1028179
Bacillus_#_megaterium_!_WSH-002_{_chromosome_}_complete_genome|gi|384044176|ref|NC_017138.1|	0.036	99.964	1800	4982175	4983975
Staphylococcus_#_aureus_!_subsp._{_aureus_}_55/2053_genomic_scaffold_supercont1.3_whole_genome_shotgun_sequence|gi|257424630|ref|NZ_GG700535.1|	0.422	99.578	1800	424856	426656
Staphylococcus_#_aureus_!_subsp._{_aureus_}_WBG10049_genomic_scaffold_supercont1.11_whole_genome_shotgun_sequence|gi|282911740|ref|NZ_GG730218.1|	0.173	99.827	1800	1036488	1038288
Staphylococcus_#_aureus_!_M1311_{_genomic_}_scaffold_aculZ-supercont1.6_whole_genome_shotgun_sequence|gi|486856699|ref|NZ_KB822180.1|	0.31	99.69	1701	547081	548782
Staphylococcus_#_aureus_!_subsp._{_aureus_}_A017934/97_genomic_scaffold_supercont1.19_whole_genome_shotgun_sequence|gi|283958999|ref|NZ_GG731513.1|	0.171	99.829	1701	990740	992441
Staphylococcus_#_aureus_!_subsp._{_aureus_}_C160_genomic_scaffold_supercont1.2_whole_genome_shotgun_sequence|gi|282902071|ref|NZ_GG730274.1|	0.163	99.837	1701	1040123	1041824
Staphylococcus_#_aureus_!_subsp._{_aureus_}_MRSA177_genomic_scaffold_Scfld320_whole_genome_shotgun_sequence|gi|422744062|ref|NZ_GL638233.1|	1.2	98.8	1701	140021	141722
Staphylococcus_#_aureus_!_subsp._{_aureus_}_WW2703/97_genomic_scaffold_supercont1.13_whole_genome_shotgun_sequence|gi|282908001|ref|NZ_GG730232.1|	0.356	99.644	1701	476690	478391
Staphylococcus_#_aureus_!_M0396_{_genomic_}_scaffold_acunf-supercont1.3_whole_genome_shotgun_sequence|gi|487367179|ref|NZ_KB821298.1|	0.409	99.591	1700	413587	415287
Staphylococcus_#_aureus_!_M1170_{_genomic_}_scaffold_acume-supercont1.1_whole_genome_shotgun_sequence|gi|486434630|ref|NZ_KB822067.1|	0.059	99.941	1700	2869549	2871249
Staphylococcus_#_aureus_!_subsp._{_aureus_}_A017934/97_genomic_scaffold_supercont1.7_whole_genome_shotgun_sequence|gi|283957314|ref|NZ_GG731501.1|	0.385	99.615	1700	439771	441471
Staphylococcus_#_aureus_!_subsp._{_aureus_}_WBG10049_genomic_scaffold_supercont1.3_whole_genome_shotgun_sequence|gi|282910157|ref|NZ_GG730210.1|	0.393	99.607	1700	430559	432259
Staphylococcus_#_aureus_!_M0633_{_genomic_}_scaffold_acyCm-supercont1.3_whole_genome_shotgun_sequence|gi|487371977|ref|NZ_KB821509.1|	0.563	99.437	1699	299954	301653
Staphylococcus_#_lugdunensis_!_ACS-027-V-Sch2_{_genomic_}_scaffold_supercont1.1_whole_genome_shotgun_sequence|gi|448879133|ref|NZ_KB373322.1|	0.091	99.909	1610	1763138	1764748
Staphylococcus_#_aureus_!_M0363_{_genomic_}_scaffold_acunN-supercont1.2_whole_genome_shotgun_sequence|gi|487364822|ref|NZ_KB821272.1|	0.056	99.944	1602	2845870	2847472
Staphylococcus_#_aureus_!_subsp._{_aureus_}_WW2703/97_genomic_scaffold_supercont1.26_whole_genome_shotgun_sequence|gi|282908680|ref|NZ_GG730245.1|	0.288	99.712	1602	554532	556134
Staphylococcus_#_sp._!_HGB0015_{_genomic_}_scaffold_aczIz-supercont1.2_whole_genome_shotgun_sequence|gi|512478261|ref|NZ_KE150418.1|	0.159	99.841	1602	1004648	1006250
Staphylococcus_#_aureus_!_M0306_{_genomic_}_scaffold_acunR-supercont1.1_whole_genome_shotgun_sequence|gi|487363159|ref|NZ_KB821198.1|	0.056	99.944	1601	2872405	2874006
Staphylococcus_#_aureus_!_subsp._{_aureus_}_58-424_genomic_scaffold_supercont1.3_whole_genome_shotgun_sequence|gi|293497427|ref|NZ_GG749056.1|	0.156	99.844	1601	1023605	1025206
Staphylococcus_#_aureus_!_subsp._{_aureus_}_65-1322_genomic_scaffold_supercont1.2_whole_genome_shotgun_sequence|gi|257426332|ref|NZ_GG700560.1|	0.157	99.843	1601	1018743	1020344
Staphylococcus_#_aureus_!_subsp._{_aureus_}_68-397_genomic_scaffold_supercont1.1_whole_genome_shotgun_sequence|gi|257428975|ref|NZ_GG700574.1|	0.158	99.842	1601	1012039	1013640
Staphylococcus_#_aureus_!_subsp._{_aureus_}_C101_genomic_scaffold_supercont1.8_whole_genome_shotgun_sequence|gi|282923802|ref|NZ_GG730127.1|	0.445	99.555	1601	357846	359447
Staphylococcus_#_aureus_!_subsp._{_aureus_}_M1015_genomic_scaffold_supercont1.19_whole_genome_shotgun_sequence|gi|293549604|ref|NZ_GG749014.1|	0.157	99.843	1601	1015042	1016643
Staphylococcus_#_aureus_!_subsp._{_aureus_}_M1015_genomic_scaffold_supercont1.6_whole_genome_shotgun_sequence|gi|293526348|ref|NZ_GG749001.1|	0.34	99.66	1601	468680	470281
Staphylococcus_#_aureus_!_subsp._{_aureus_}_M809_genomic_scaffold_supercont1.11_whole_genome_shotgun_sequence|gi|293509961|ref|NZ_GG749309.1|	0.442	99.558	1601	360770	362371
Staphylococcus_#_aureus_!_subsp._{_aureus_}_M876_genomic_scaffold_supercont1.2_whole_genome_shotgun_sequence|gi|257434580|ref|NZ_GG700615.1|	0.158	99.842	1601	1013639	1015240
Staphylococcus_#_aureus_!_subsp._{_aureus_}_MRSA177_genomic_scaffold_Scfld42_whole_genome_shotgun_sequence|gi|422742527|ref|NZ_GL638205.1|	0.794	99.206	1601	199917	201518
Staphylococcus_#_aureus_!_M0350_{_genomic_}_scaffold_acunH-supercont1.2_whole_genome_shotgun_sequence|gi|487364069|ref|NZ_KB821251.1|	0.059	99.941	1600	2709754	2711354
Staphylococcus_#_aureus_!_M0844_{_genomic_}_scaffold_acvqL-supercont1.2_whole_genome_shotgun_sequence|gi|486385588|ref|NZ_KB821711.1|	0.065	99.935	1600	2449859	2451459
Staphylococcus_#_aureus_!_subsp._{_aureus_}_65-1322_genomic_scaffold_supercont1.5_whole_genome_shotgun_sequence|gi|257427298|ref|NZ_GG700563.1|	0.374	99.626	1600	426440	428040
Staphylococcus_#_aureus_!_subsp._{_aureus_}_C160_genomic_scaffold_supercont1.4_whole_genome_shotgun_sequence|gi|282903104|ref|NZ_GG730276.1|	0.367	99.633	1600	434647	436247
Staphylococcus_#_aureus_!_subsp._{_aureus_}_E1410_genomic_scaffold_supercont1.5_whole_genome_shotgun_sequence|gi|257432636|ref|NZ_GG700601.1|	0.372	99.628	1600	428465	430065
Staphylococcus_#_aureus_!_subsp._{_aureus_}_M876_genomic_scaffold_supercont1.5_whole_genome_shotgun_sequence|gi|257435540|ref|NZ_GG700618.1|	0.375	99.625	1600	424920	426520
Staphylococcus_#_aureus_!_subsp._{_aureus_}_MRSA131_genomic_scaffold_Scfld153_whole_genome_shotgun_sequence|gi|422746362|ref|NZ_GL638182.1|	0.781	99.219	1600	203328	204928
Staphylococcus_#_carnosus_!_subsp._{_carnosus_}_TM300_chromosome_complete_genome|gi|224475494|ref|NC_012121.1|	0.062	99.938	1600	2564824	2566424
Staphylococcus_#_epidermidis_!_M0881_{_genomic_}_scaffold_acumm-supercont1.6_whole_genome_shotgun_sequence|gi|489048088|ref|NZ_KB821726.1|	0.156	99.844	1570	1003644	1005214
Staphylococcus_#_aureus_!_subsp._{_aureus_}_MRSA177_genomic_scaffold_Scfld209_whole_genome_shotgun_sequence|gi|422743733|ref|NZ_GL638226.1|	1.338	98.662	1502	110723	112225
Staphylococcus_#_aureus_!_M0367_{_genomic_}_scaffold_acunU-supercont1.3_whole_genome_shotgun_sequence|gi|487365191|ref|NZ_KB821276.1|	0.052	99.948	1501	2874453	2875954
Staphylococcus_#_aureus_!_M0539_{_genomic_}_scaffold_acvqn-supercont1.11_whole_genome_shotgun_sequence|gi|486347448|ref|NZ_KB821452.1|	0.24	99.76	1500	622260	623760
Staphylococcus_#_aureus_!_M0586_{_genomic_}_scaffold_acunQ-supercont1.1_whole_genome_shotgun_sequence|gi|487371607|ref|NZ_KB821500.1|	0.051	99.949	1500	2926524	2928024
Staphylococcus_#_aureus_!_M1034_{_genomic_}_scaffold_acumn-supercont1.8_whole_genome_shotgun_sequence|gi|487391857|ref|NZ_KB821859.1|	0.29	99.71	1500	516291	517791
Staphylococcus_#_aureus_!_subsp._{_aureus_}_55/2053_genomic_scaffold_supercont1.5_whole_genome_shotgun_sequence|gi|257425216|ref|NZ_GG700537.1|	0.375	99.625	1500	398047	399547
Staphylococcus_#_aureus_!_subsp._{_aureus_}_C427_genomic_scaffold_supercont1.6_whole_genome_shotgun_sequence|gi|282918303|ref|NZ_GG730146.1|	0.373	99.627	1500	400319	401819
Staphylococcus_#_aureus_!_M0792_{_genomic_}_scaffold_acuni-supercont1.8_whole_genome_shotgun_sequence|gi|487383273|ref|NZ_KB821678.1|	0.078	99.922	1401	1789192	1790593
Staphylococcus_#_aureus_!_M0946_{_genomic_}_scaffold_acunJ-supercont1.3_whole_genome_shotgun_sequence|gi|487387957|ref|NZ_KB821788.1|	0.225	99.775	1401	621629	623030
Staphylococcus_#_aureus_!_M1520_{_genomic_}_scaffold_acunp-supercont1.1_whole_genome_shotgun_sequence|gi|487137167|ref|NZ_KB822266.1|	0.05	99.95	1401	2817413	2818814
Staphylococcus_#_aureus_!_subsp._{_aureus_}_C427_genomic_scaffold_supercont1.18_whole_genome_shotgun_sequence|gi|282920745|ref|NZ_GG730158.1|	0.141	99.859	1401	992253	993654
Bacillus_#_cereus_!_AH187_{_chromosome_}_complete_genome|gi|217957581|ref|NC_011658.1|	0.027	99.973	1400	5267630	5269030
Bacillus_#_cereus_!_B4264_{_chromosome_}_complete_genome|gi|218230750|ref|NC_011725.1|	0.026	99.974	1400	5417636	5419036
Bacillus_#_thuringiensis_!_BMB171_{_chromosome_}_complete_genome|gi|296500838|ref|NC_014171.1|	0.026	99.974	1400	5328688	5330088
Bacillus_#_thuringiensis_!_Bt407_{_chromosome_}_complete_genome|gi|409187965|ref|NC_018877.1|	0.025	99.975	1400	5499101	5500501
Bacillus_#_thuringiensis_!_HD-789_{_complete_}_genome|gi|434373506|ref|NC_018508.1|	0.025	99.975	1400	5493878	5495278
Bacillus_#_thuringiensis_!_MC28_{_chromosome_}_complete_genome|gi|407703236|ref|NC_018693.1|	0.026	99.974	1400	5413094	5414494
Bacillus_#_thuringiensis_!_str._{_Al_}_Hakam_chromosome_complete_genome|gi|118475778|ref|NC_008600.1|	0.027	99.973	1400	5255691	5257091
Bacillus_#_weihenstephanensis_!_KBAB4_{_chromosome_}_complete_genome|gi|163938013|ref|NC_010184.1|	0.027	99.973	1400	5261375	5262775
Staphylococcus_#_aureus_!_M0171_{_genomic_}_scaffold_acqwu-supercont1.5_whole_genome_shotgun_sequence|gi|487372978|ref|NZ_KB821065.1|	0.092	99.908	1400	1519496	1520896
Staphylococcus_#_aureus_!_M0250_{_genomic_}_scaffold_acuma-supercont1.1_whole_genome_shotgun_sequence|gi|487362212|ref|NZ_KB821141.1|	0.049	99.951	1400	2866927	2868327
Staphylococcus_#_aureus_!_M0571_{_genomic_}_scaffold_acumO-supercont1.2_whole_genome_shotgun_sequence|gi|487370688|ref|NZ_KB821477.1|	0.048	99.952	1400	2898355	2899755
Staphylococcus_#_aureus_!_subsp._{_aureus_}_C101_genomic_scaffold_supercont1.6_whole_genome_shotgun_sequence|gi|282923265|ref|NZ_GG730125.1|	0.352	99.648	1400	396318	397718
Staphylococcus_#_aureus_!_subsp._{_aureus_}_M1015_genomic_scaffold_supercont1.4_whole_genome_shotgun_sequence|gi|293523927|ref|NZ_GG748999.1|	0.352	99.648	1400	396586	397986
Staphylococcus_#_aureus_!_subsp._{_aureus_}_M899_genomic_scaffold_supercont1.5_whole_genome_shotgun_sequence|gi|282913349|ref|NZ_GG730194.1|	0.353	99.647	1400	395720	397120
Staphylococcus_#_aureus_!_subsp._{_aureus_}_MRSA177_genomic_scaffold_Scfld68_whole_genome_shotgun_sequence|gi|422743148|ref|NZ_GL638216.1|	0.882	99.118	1400	157369	158769
Staphylococcus_#_aureus_!_subsp._{_aureus_}_MRSA177_genomic_scaffold_Scfld384_whole_genome_shotgun_sequence|gi|422744230|ref|NZ_GL638236.1|	1.184	98.816	1399	116794	118193
Staphylococcus_#_aureus_!_subsp._{_aureus_}_MRSA131_genomic_scaffold_Scfld52_whole_genome_shotgun_sequence|gi|422745115|ref|NZ_GL638170.1|	0.911	99.089	1349	146673	148022
Staphylococcus_#_aureus_!_subsp._{_aureus_}_MRSA177_genomic_scaffold_Scfld389_whole_genome_shotgun_sequence|gi|422744368|ref|NZ_GL638237.1|	0.911	99.089	1349	146787	148136
Staphylococcus_#_aureus_!_M0279_{_genomic_}_scaffold_acqxn-supercont1.2_whole_genome_shotgun_sequence|gi|487375990|ref|NZ_KB821175.1|	0.075	99.925	1301	1737214	1738515
Staphylococcus_#_aureus_!_M0900_{_genomic_}_scaffold_acunz-supercont1.6_whole_genome_shotgun_sequence|gi|487386371|ref|NZ_KB821744.1|	0.186	99.814	1301	696356	697657
Staphylococcus_#_aureus_!_M1060_{_genomic_}_scaffold_acunt-supercont1.1_whole_genome_shotgun_sequence|gi|487400592|ref|NZ_KB822368.1|	0.055	99.945	1301	2354757	2356058
Staphylococcus_#_aureus_!_M1510_{_genomic_}_scaffold_aculM-supercont1.2_whole_genome_shotgun_sequence|gi|487399506|ref|NZ_KB822258.1|	0.101	99.899	1301	1292322	1293623
Staphylococcus_#_aureus_!_subsp._{_aureus_}_WBG10049_genomic_scaffold_supercont1.4_whole_genome_shotgun_sequence|gi|282910573|ref|NZ_GG730211.1|	0.318	99.682	1301	407452	408753
Bacillus_#_cereus_!_G9842_{_chromosome_}_complete_genome|gi|218895141|ref|NC_011772.1|	0.024	99.976	1300	5386034	5387334
Bacillus_#_thuringiensis_!_serovar_{_thuringiensis_}_str._IS5056_complete_genome|gi|452196381|ref|NC_020376.1|	0.024	99.976	1300	5490635	5491935
Staphylococcus_#_aureus_!_M0648_{_genomic_}_scaffold_acunl-supercont1.6_whole_genome_shotgun_sequence|gi|487381205|ref|NZ_KB821527.1|	0.207	99.793	1300	627191	628491
Staphylococcus_#_aureus_!_M0946_{_genomic_}_scaffold_acunJ-supercont1.4_whole_genome_shotgun_sequence|gi|487388014|ref|NZ_KB821789.1|	0.412	99.588	1300	313913	315213
Staphylococcus_#_aureus_!_M1061_{_genomic_}_scaffold_aculN-supercont1.5_whole_genome_shotgun_sequence|gi|487393551|ref|NZ_KB821896.1|	2.735	97.265	1300	46239	47539
Staphylococcus_#_aureus_!_M1076_{_genomic_}_scaffold_acumq-supercont1.1_whole_genome_shotgun_sequence|gi|486417634|ref|NZ_KB821951.1|	0.087	99.913	1300	1492260	1493560
Staphylococcus_#_aureus_!_M0029_{_genomic_}_scaffold_acqwZ-supercont1.2_whole_genome_shotgun_sequence|gi|486225786|ref|NZ_KB820963.1|	0.042	99.958	1201	2861978	2863179
Staphylococcus_#_aureus_!_M0455_{_genomic_}_scaffold_acqxx-supercont1.1_whole_genome_shotgun_sequence|gi|487379684|ref|NZ_KB821355.1|	0.044	99.956	1201	2725439	2726640
Staphylococcus_#_aureus_!_M0687_{_genomic_}_scaffold_acvqC-supercont1.5_whole_genome_shotgun_sequence|gi|486366366|ref|NZ_KB821581.1|	0.084	99.916	1201	1427306	1428507
Staphylococcus_#_aureus_!_M1015_{_genomic_}_scaffold_acvqH-supercont1.5_whole_genome_shotgun_sequence|gi|486404951|ref|NZ_KB821838.1|	0.121	99.879	1201	990823	992024
Staphylococcus_#_aureus_!_M1044_{_genomic_}_scaffold_acumE-supercont1.6_whole_genome_shotgun_sequence|gi|487392815|ref|NZ_KB821886.1|	0.191	99.809	1201	627823	629024
Staphylococcus_#_aureus_!_M1321_{_genomic_}_scaffold_acunh-supercont1.6_whole_genome_shotgun_sequence|gi|486924102|ref|NZ_KB822196.1|	0.187	99.813	1201	639758	640959
Bacillus_#_cereus_!_AH820_{_chromosome_}_complete_genome|gi|218901206|ref|NC_011773.1|	0.023	99.977	1200	5301483	5302683
Bacillus_#_sp._!_1NLA3E_{_complete_}_genome|gi|488570484|ref|NC_021171.1|	0.025	99.975	1200	4814402	4815602
Solibacillus_#_silvestris_!_StLB046_{_complete_}_genome|gi|393198727|ref|NC_018065.1|	0.03	99.97	1200	3968127	3969327
Staphylococcus_#_aureus_!_M0006_{_genomic_}_scaffold_aculO-supercont1.8_whole_genome_shotgun_sequence|gi|487267757|ref|NZ_KB820960.1|	0.125	99.875	1200	959550	960750
Staphylococcus_#_aureus_!_M0103_{_genomic_}_scaffold_acqxd-supercont1.4_whole_genome_shotgun_sequence|gi|486246367|ref|NZ_KB821017.1|	0.098	99.902	1200	1221162	1222362
Staphylococcus_#_aureus_!_M0200_{_genomic_}_scaffold_acumC-supercont1.6_whole_genome_shotgun_sequence|gi|487360555|ref|NZ_KB821101.1|	0.098	99.902	1200	1222069	1223269
Staphylococcus_#_aureus_!_M0280_{_genomic_}_scaffold_acunT-supercont1.6_whole_genome_shotgun_sequence|gi|487362590|ref|NZ_KB821186.1|	0.129	99.871	1200	929495	930695
Staphylococcus_#_aureus_!_M0288_{_genomic_}_scaffold_acqwg-supercont1.1_whole_genome_shotgun_sequence|gi|487376330|ref|NZ_KB821190.1|	0.097	99.903	1200	1229851	1231051
Staphylococcus_#_aureus_!_M0328_{_genomic_}_scaffold_acrGR-supercont1.3_whole_genome_shotgun_sequence|gi|486272254|ref|NZ_KB821213.1|	0.186	99.814	1200	645020	646220
Staphylococcus_#_aureus_!_M0415_{_genomic_}_scaffold_acrGP-supercont1.4_whole_genome_shotgun_sequence|gi|487379243|ref|NZ_KB821320.1|	0.253	99.747	1200	472514	473714
Staphylococcus_#_aureus_!_M0489_{_genomic_}_scaffold_acsPG-supercont1.8_whole_genome_shotgun_sequence|gi|486318205|ref|NZ_KB821399.1|	0.094	99.906	1200	1269131	1270331
Staphylococcus_#_aureus_!_M0660_{_genomic_}_scaffold_acumg-supercont1.10_whole_genome_shotgun_sequence|gi|487381382|ref|NZ_KB821532.1|	0.192	99.808	1200	623185	624385
Staphylococcus_#_aureus_!_M0663_{_genomic_}_scaffold_acuoc-supercont1.6_whole_genome_shotgun_sequence|gi|487382141|ref|NZ_KB821557.1|	0.192	99.808	1200	623574	624774
Staphylococcus_#_aureus_!_M0799_{_genomic_}_scaffold_acvqq-supercont1.7_whole_genome_shotgun_sequence|gi|486380307|ref|NZ_KB821659.1|	0.178	99.822	1200	674776	675976
Staphylococcus_#_aureus_!_M0944_{_genomic_}_scaffold_acvqy-supercont1.1_whole_genome_shotgun_sequence|gi|486393915|ref|NZ_KB821779.1|	0.074	99.926	1200	1630529	1631729
Staphylococcus_#_aureus_!_M0946_{_genomic_}_scaffold_acunJ-supercont1.8_whole_genome_shotgun_sequence|gi|487388234|ref|NZ_KB821793.1|	0.345	99.655	1200	346955	348155
Staphylococcus_#_aureus_!_M0964_{_genomic_}_scaffold_aculV-supercont1.5_whole_genome_shotgun_sequence|gi|487388602|ref|NZ_KB821805.1|	0.095	99.905	1200	1258951	1260151
Staphylococcus_#_aureus_!_M1103_{_genomic_}_scaffold_acump-supercont1.5_whole_genome_shotgun_sequence|gi|486429182|ref|NZ_KB822038.1|	0.129	99.871	1200	930975	932175
Staphylococcus_#_aureus_!_M1199_{_genomic_}_scaffold_acunF-supercont1.1_whole_genome_shotgun_sequence|gi|486447954|ref|NZ_KB822062.1|	0.052	99.948	1200	2321337	2322537
Staphylococcus_#_aureus_!_subsp._{_aureus_}_D139_genomic_scaffold_supercont1.25_whole_genome_shotgun_sequence|gi|282917720|ref|NZ_GG730183.1|	0.279	99.721	1200	429492	430692
Staphylococcus_#_aureus_!_subsp._{_aureus_}_MRSA131_genomic_scaffold_Scfld55_whole_genome_shotgun_sequence|gi|422745238|ref|NZ_GL638171.1|	0.894	99.106	1200	132977	134177
Staphylococcus_#_lugdunensis_!_HKU09-01_{_chromosome_}_complete_genome|gi|289549371|ref|NC_013893.1|	0.045	99.955	1200	2657166	2658366
Staphylococcus_#_aureus_!_subsp._{_aureus_}_M809_genomic_scaffold_supercont1.25_whole_genome_shotgun_sequence|gi|293511363|ref|NZ_GG749323.1|	0.217	99.783	1199	552121	553320
Staphylococcus_#_aureus_!_M0478_{_genomic_}_scaffold_acrGZ-supercont1.5_whole_genome_shotgun_sequence|gi|486313128|ref|NZ_KB821380.1|	0.121	99.879	1102	906916	908018
Staphylococcus_#_aureus_!_subsp._{_aureus_}_EMRSA16_genomic_scaffold_supercont1.20_whole_genome_shotgun_sequence|gi|295428968|ref|NZ_GG770532.1|	0.267	99.733	1102	411226	412328
Staphylococcus_#_aureus_!_M1034_{_genomic_}_scaffold_acumn-supercont1.6_whole_genome_shotgun_sequence|gi|487391557|ref|NZ_KB821857.1|	0.32	99.68	1101	342632	343733
Staphylococcus_#_aureus_!_M1309_{_genomic_}_scaffold_acunC-supercont1.3_whole_genome_shotgun_sequence|gi|487398415|ref|NZ_KB822158.1|	0.09	99.91	1101	1228424	1229525
Staphylococcus_#_aureus_!_subsp._{_aureus_}_C101_genomic_scaffold_supercont1.9_whole_genome_shotgun_sequence|gi|282924193|ref|NZ_GG730128.1|	0.493	99.507	1101	222259	223360
Staphylococcus_#_aureus_!_subsp._{_aureus_}_MRSA177_genomic_scaffold_Scfld14_whole_genome_shotgun_sequence|gi|422742133|ref|NZ_GL638200.1|	0.767	99.233	1101	142381	143482
Staphylococcus_#_aureus_!_M0077_{_genomic_}_scaffold_acunP-supercont1.2_whole_genome_shotgun_sequence|gi|487350114|ref|NZ_KB821000.1|	0.09	99.91	1100	1222561	1223661
Staphylococcus_#_aureus_!_M0104_{_genomic_}_scaffold_acrHp-supercont1.7_whole_genome_shotgun_sequence|gi|487372667|ref|NZ_KB821030.1|	0.179	99.821	1100	611799	612899
Staphylococcus_#_aureus_!_M0144_{_genomic_}_scaffold_acunq-supercont1.3_whole_genome_shotgun_sequence|gi|487359205|ref|NZ_KB821040.1|	0.119	99.881	1100	925892	926992
Staphylococcus_#_aureus_!_M0294_{_genomic_}_scaffold_acumG-supercont1.7_whole_genome_shotgun_sequence|gi|487400143|ref|NZ_KB822359.1|	0.144	99.856	1100	762705	763805
Staphylococcus_#_aureus_!_M0334_{_genomic_}_scaffold_acumz-supercont1.4_whole_genome_shotgun_sequence|gi|487363716|ref|NZ_KB821237.1|	0.072	99.928	1100	1527676	1528776
Staphylococcus_#_aureus_!_M0375_{_genomic_}_scaffold_acunY-supercont1.6_whole_genome_shotgun_sequence|gi|487366006|ref|NZ_KB821292.1|	0.176	99.824	1100	623945	625045
Staphylococcus_#_aureus_!_M0547_{_genomic_}_scaffold_acvqJ-supercont1.5_whole_genome_shotgun_sequence|gi|486352271|ref|NZ_KB821446.1|	0.175	99.825	1100	627665	628765
Staphylococcus_#_aureus_!_M0602_{_genomic_}_scaffold_acvqp-supercont1.4_whole_genome_shotgun_sequence|gi|486359560|ref|NZ_KB821496.1|	0.213	99.787	1100	515701	516801
Staphylococcus_#_aureus_!_M0646_{_genomic_}_scaffold_acuoa-supercont1.6_whole_genome_shotgun_sequence|gi|487380761|ref|NZ_KB821517.1|	0.087	99.913	1100	1258454	1259554
Staphylococcus_#_aureus_!_M0692_{_genomic_}_scaffold_acvqM-supercont1.8_whole_genome_shotgun_sequence|gi|486369751|ref|NZ_KB821594.1|	0.107	99.893	1100	1027084	1028184
Staphylococcus_#_aureus_!_M0823_{_genomic_}_scaffold_acvqk-supercont1.6_whole_genome_shotgun_sequence|gi|486383324|ref|NZ_KB821696.1|	0.118	99.882	1100	929196	930296
Staphylococcus_#_aureus_!_M0934_{_genomic_}_scaffold_acvqs-supercont1.2_whole_genome_shotgun_sequence|gi|486388784|ref|NZ_KB821761.1|	0.157	99.843	1100	701762	702862
Staphylococcus_#_aureus_!_M1063_{_genomic_}_scaffold_acumZ-supercont1.8_whole_genome_shotgun_sequence|gi|486416926|ref|NZ_KB821910.1|	0.162	99.838	1100	677576	678676
Staphylococcus_#_aureus_!_M1109_{_genomic_}_scaffold_acunD-supercont1.9_whole_genome_shotgun_sequence|gi|487395760|ref|NZ_KB822020.1|	2.301	97.699	1100	46711	47811
Staphylococcus_#_aureus_!_M1119_{_genomic_}_scaffold_acunS-supercont1.5_whole_genome_shotgun_sequence|gi|486431063|ref|NZ_KB822029.1|	0.17	99.83	1100	647527	648627
Staphylococcus_#_aureus_!_M1311_{_genomic_}_scaffold_aculZ-supercont1.4_whole_genome_shotgun_sequence|gi|486840504|ref|NZ_KB822178.1|	0.293	99.707	1100	374336	375436
Staphylococcus_#_aureus_!_M1466_{_genomic_}_scaffold_acumV-supercont1.7_whole_genome_shotgun_sequence|gi|487401900|ref|NZ_KB822399.1|	0.087	99.913	1100	1266344	1267444
Staphylococcus_#_aureus_!_M1521_{_genomic_}_scaffold_acunr-supercont1.4_whole_genome_shotgun_sequence|gi|487137439|ref|NZ_KB822271.1|	0.176	99.824	1100	625351	626451
Staphylococcus_#_aureus_!_M1565_{_genomic_}_scaffold_acunk-supercont1.2_whole_genome_shotgun_sequence|gi|487189945|ref|NZ_KB822300.1|	0.176	99.824	1100	625452	626552
Staphylococcus_#_aureus_!_subsp._{_aureus_}_68-397_genomic_scaffold_supercont1.4_whole_genome_shotgun_sequence|gi|257429934|ref|NZ_GG700577.1|	0.369	99.631	1100	296712	297812
Staphylococcus_#_aureus_!_subsp._{_aureus_}_D139_genomic_scaffold_supercont1.13_whole_genome_shotgun_sequence|gi|282916185|ref|NZ_GG730171.1|	0.329	99.671	1100	333557	334657
Staphylococcus_#_aureus_!_subsp._{_aureus_}_MRSA177_genomic_scaffold_Scfld22_whole_genome_shotgun_sequence|gi|422742404|ref|NZ_GL638203.1|	1.255	98.745	1100	86521	87621
Staphylococcus_#_aureus_!_subsp._{_aureus_}_USA300_TCH959_genomic_scaffold_SCAFFOLD3_whole_genome_shotgun_sequence|gi|255926319|ref|NZ_GG697987.1|	0.601	99.399	1100	181790	182890
Staphylococcus_#_epidermidis_!_BCM-HMP0060_{_genomic_}_scaffold_SCAFFOLD1_whole_genome_shotgun_sequence|gi|254281370|ref|NZ_GG696727.1|	0.121	99.879	1100	907039	908139
Staphylococcus_#_aureus_!_M0404_{_genomic_}_scaffold_acrGQ-supercont1.4_whole_genome_shotgun_sequence|gi|487378778|ref|NZ_KB821305.1|	0.096	99.904	1001	1045402	1046403
Staphylococcus_#_aureus_!_M0892_{_genomic_}_scaffold_aculW-supercont1.3_whole_genome_shotgun_sequence|gi|487385673|ref|NZ_KB821732.1|	0.082	99.918	1001	1225561	1226562
Staphylococcus_#_aureus_!_subsp._{_aureus_}_58-424_genomic_scaffold_supercont1.10_whole_genome_shotgun_sequence|gi|293503318|ref|NZ_GG749063.1|	0.235	99.765	1001	425291	426292
Bacillus_#_amyloliquefaciens_!_IT-45_{_complete_}_genome|gi|451344759|ref|NC_020272.1|	0.025	99.975	1000	3927857	3928857
Bacillus_#_amyloliquefaciens_!_subsp._{_plantarum_}_AS43.3_chromosome_complete_genome|gi|429503531|ref|NC_019842.1|	0.025	99.975	1000	3960368	3961368
Bacillus_#_amyloliquefaciens_!_subsp._{_plantarum_}_UCMB5036_complete_genome|gi|452854062|ref|NC_020410.1|	0.026	99.974	1000	3909324	3910324
Bacillus_#_cereus_!_biovar_{_anthracis_}_str._CI_chromosome_complete_genome|gi|301051741|ref|NC_014335.1|	0.019	99.981	1000	5195054	5196054
Bacillus_#_subtilis_!_BSn5_{_chromosome_}_complete_genome|gi|321311376|ref|NC_014976.1|	0.024	99.976	1000	4092599	4093599
Bacillus_#_subtilis_!_subsp._{_natto_}_BEST195_complete_genome_***_SEQUENCING_IN_PROGRESS_***|gi|428277412|ref|NC_017196.1|	0.024	99.976	1000	4090591	4091591
Bacillus_#_subtilis_!_subsp._{_spizizenii_}_TU-B-10_chromosome_complete_genome|gi|350264100|ref|NC_016047.1|	0.024	99.976	1000	4206222	4207222
Bacillus_#_subtilis_!_subsp._{_subtilis_}_6051-HGW_complete_genome|gi|470160151|ref|NC_020507.1|	0.024	99.976	1000	4214610	4215610
Bacillus_#_subtilis_!_subsp._{_subtilis_}_str._168_chromosome_complete_genome|gi|255767013|ref|NC_000964.3|	0.024	99.976	1000	4214606	4215606
Bacillus_#_subtilis_!_subsp._{_subtilis_}_str._BSP1_chromosome_complete_genome|gi|430755491|ref|NC_019896.1|	0.025	99.975	1000	4042754	4043754
Geobacillus_#_sp._!_WCH70_{_chromosome_}_complete_genome|gi|239825584|ref|NC_012793.1|	0.029	99.971	1000	3463618	3464618
Geobacillus_#_sp._!_Y4.1MC1_{_chromosome_}_complete_genome|gi|312109151|ref|NC_014650.1|	0.026	99.974	1000	3839330	3840330
Geobacillus_#_thermoglucosidasius_!_C56-YS93_{_chromosome_}_complete_genome|gi|336233546|ref|NC_015660.1|	0.026	99.974	1000	3892306	3893306
Lysinibacillus_#_sphaericus_!_C3-41_{_chromosome_}_complete_genome|gi|169825618|ref|NC_010382.1|	0.022	99.978	1000	4638821	4639821
Staphylococcus_#_aureus_!_M1007_{_genomic_}_scaffold_acvqZ-supercont1.4_whole_genome_shotgun_sequence|gi|486401664|ref|NZ_KB821832.1|	0.86	99.14	1000	115279	116279
Staphylococcus_#_aureus_!_M1311_{_genomic_}_scaffold_aculZ-supercont1.5_whole_genome_shotgun_sequence|gi|486843581|ref|NZ_KB822179.1|	0.172	99.828	1000	581916	582916
Staphylococcus_#_aureus_!_subsp._{_aureus_}_C101_genomic_scaffold_supercont1.2_whole_genome_shotgun_sequence|gi|282922348|ref|NZ_GG730121.1|	0.152	99.848	1000	655647	656647
Staphylococcus_#_aureus_!_subsp._{_aureus_}_EMRSA16_genomic_scaffold_supercont1.7_whole_genome_shotgun_sequence|gi|295427229|ref|NZ_GG770519.1|	0.433	99.567	1000	229871	230871
Staphylococcus_#_aureus_!_subsp._{_aureus_}_M899_genomic_scaffold_supercont1.2_whole_genome_shotgun_sequence|gi|282912717|ref|NZ_GG730191.1|	0.153	99.847	1000	652549	653549
Staphylococcus_#_aureus_!_subsp._{_aureus_}_MRSA131_genomic_scaffold_Scfld253_whole_genome_shotgun_sequence|gi|422747121|ref|NZ_GL638191.1|	1.128	98.872	1000	87640	88640
Staphylococcus_#_aureus_!_subsp._{_aureus_}_TCH130_genomic_scaffold_SCAFFOLD15_whole_genome_shotgun_sequence|gi|255925777|ref|NZ_GG698172.1|	0.701	99.299	1000	141728	142728
Staphylococcus_#_aureus_!_subsp._{_aureus_}_MRSA131_genomic_scaffold_Scfld228_whole_genome_shotgun_sequence|gi|422746915|ref|NZ_GL638189.1|	0.578	99.422	999	171705	172704
Staphylococcus_#_aureus_!_M0212_{_genomic_}_scaffold_acuna-supercont1.3_whole_genome_shotgun_sequence|gi|487360877|ref|NZ_KB821112.1|	0.072	99.928	901	1256800	1257701
Staphylococcus_#_aureus_!_M0438_{_genomic_}_scaffold_acuml-supercont1.3_whole_genome_shotgun_sequence|gi|487368648|ref|NZ_KB821352.1|	0.074	99.926	901	1213391	1214292
Staphylococcus_#_aureus_!_M0510_{_genomic_}_scaffold_acumF-supercont1.3_whole_genome_shotgun_sequence|gi|487369026|ref|NZ_KB821409.1|	0.068	99.932	901	1322106	1323007
Staphylococcus_#_aureus_!_M1531_{_genomic_}_scaffold_acunL-supercont1.2_whole_genome_shotgun_sequence|gi|487137933|ref|NZ_KB822264.1|	0.038	99.962	901	2384445	2385346
Staphylococcus_#_aureus_!_subsp._{_aureus_}_55/2053_genomic_scaffold_supercont1.6_whole_genome_shotgun_sequence|gi|257425560|ref|NZ_GG700538.1|	0.215	99.785	901	417420	418321
Staphylococcus_#_aureus_!_subsp._{_aureus_}_M876_genomic_scaffold_supercont1.9_whole_genome_shotgun_sequence|gi|257436456|ref|NZ_GG700622.1|	0.214	99.786	901	420997	421898
Staphylococcus_#_aureus_!_subsp._{_aureus_}_M899_genomic_scaffold_supercont1.8_whole_genome_shotgun_sequence|gi|282914286|ref|NZ_GG730197.1|	0.23	99.77	901	390121	391022
Staphylococcus_#_aureus_!_subsp._{_aureus_}_MRSA177_genomic_scaffold_Scfld20_whole_genome_shotgun_sequence|gi|422742311|ref|NZ_GL638202.1|	0.837	99.163	901	106786	107687
Bacillus_#_amyloliquefaciens_!_DSM_{_7_}_complete_genome|gi|308171891|ref|NC_014551.1|	0.023	99.977	900	3979299	3980199
Bacillus_#_coagulans_!_2-6_{_chromosome_}_complete_genome|gi|336112679|ref|NC_015634.1|	0.029	99.971	900	3072179	3073079
Bacillus_#_subtilis_!_XF-1_{_complete_}_genome|gi|449092714|ref|NC_020244.1|	0.022	99.978	900	4060286	4061186
Bacillus_#_subtilis_!_subsp._{_subtilis_}_str._JH642_chromosome_whole_genome_shotgun_sequence|gi|223666306|ref|NZ_CM000489.1|	0.021	99.979	900	4186715	4187615
Bacillus_#_subtilis_!_subsp._{_subtilis_}_str._NCIB_3610_chromosome_whole_genome_shotgun_sequence|gi|223666305|ref|NZ_CM000488.1|	0.021	99.979	900	4213698	4214598
Bacillus_#_subtilis_!_subsp._{_subtilis_}_str._SMY_chromosome_whole_genome_shotgun_sequence|gi|223666307|ref|NZ_CM000490.1|	0.021	99.979	900	4213743	4214643
Exiguobacterium_#_antarcticum_!_B7_{_chromosome_}_complete_genome|gi|407475894|ref|NC_018665.1|	0.032	99.968	900	2814963	2815863
Exiguobacterium_#_sibiricum_!_255-15_{_chromosome_}_complete_genome|gi|172056045|ref|NC_010556.1|	0.03	99.97	900	3033236	3034136
Geobacillus_#_thermoleovorans_!_CCB_US3_UF5_{_chromosome_}_complete_genome|gi|375006802|ref|NC_016593.1|	0.025	99.975	900	3595720	3596620
Staphylococcus_#_aureus_!_M0108_{_genomic_}_scaffold_acunZ-supercont1.5_whole_genome_shotgun_sequence|gi|487358807|ref|NZ_KB821037.1|	0.078	99.922	900	1160203	1161103
Staphylococcus_#_aureus_!_M0391_{_genomic_}_scaffold_acqwG-supercont1.6_whole_genome_shotgun_sequence|gi|486291032|ref|NZ_KB821314.1|	0.287	99.713	900	312240	313140
Staphylococcus_#_aureus_!_M0408_{_genomic_}_scaffold_acrHk-supercont1.2_whole_genome_shotgun_sequence|gi|486294733|ref|NZ_KB821327.1|	0.308	99.692	900	291527	292427
Staphylococcus_#_aureus_!_M0528_{_genomic_}_scaffold_acvqo-supercont1.11_whole_genome_shotgun_sequence|gi|486335757|ref|NZ_KB821416.1|	0.079	99.921	900	1139081	1139981
Staphylococcus_#_aureus_!_subsp._{_aureus_}_Btn1260_genomic_scaffold_supercont1.5_whole_genome_shotgun_sequence|gi|282905146|ref|NZ_GG730260.1|	0.512	99.488	900	175046	175946
Staphylococcus_#_aureus_!_subsp._{_aureus_}_EMRSA16_genomic_scaffold_supercont1.15_whole_genome_shotgun_sequence|gi|295428440|ref|NZ_GG770527.1|	0.484	99.516	900	185034	185934
Staphylococcus_#_aureus_!_subsp._{_aureus_}_H19_genomic_scaffold_supercont1.9_whole_genome_shotgun_sequence|gi|283770944|ref|NZ_GG730343.1|	0.385	99.615	900	232573	233473
Staphylococcus_#_aureus_!_subsp._{_aureus_}_MRSA177_genomic_scaffold_Scfld52_whole_genome_shotgun_sequence|gi|422742750|ref|NZ_GL638208.1|	0.793	99.207	900	112528	113428
Staphylococcus_#_aureus_!_M0340_{_genomic_}_scaffold_acqxN-supercont1.3_whole_genome_shotgun_sequence|gi|486281296|ref|NZ_KB821243.1|	0.5	99.5	899	179015	179914
Staphylococcus_#_aureus_!_M1064_{_genomic_}_scaffold_acumU-supercont1.7_whole_genome_shotgun_sequence|gi|486421041|ref|NZ_KB821943.1|	0.505	99.495	899	177172	178071
Staphylococcus_#_aureus_!_subsp._{_aureus_}_Btn1260_genomic_scaffold_supercont1.3_whole_genome_shotgun_sequence|gi|282904893|ref|NZ_GG730258.1|	14.212	85.788	879	5306	6185
Staphylococcus_#_aureus_!_M0978_{_genomic_}_scaffold_acunG-supercont1.7_whole_genome_shotgun_sequence|gi|487390337|ref|NZ_KB821777.1|	0.037	99.963	801	2178457	2179258
Staphylococcus_#_aureus_!_M0994_{_genomic_}_scaffold_acunc-supercont1.2_whole_genome_shotgun_sequence|gi|487390609|ref|NZ_KB821810.1|	0.068	99.932	801	1175210	1176011
Staphylococcus_#_aureus_!_M1095_{_genomic_}_scaffold_aculR-supercont1.4_whole_genome_shotgun_sequence|gi|486426334|ref|NZ_KB821982.1|	0.126	99.874	801	634886	635687
Staphylococcus_#_aureus_!_subsp._{_aureus_}_TCH130_genomic_scaffold_SCAFFOLD8_whole_genome_shotgun_sequence|gi|255925770|ref|NZ_GG698165.1|	0.585	99.415	801	136144	136945
Staphylococcus_#_sp._!_HGB0015_{_genomic_}_scaffold_aczIz-supercont1.1_whole_genome_shotgun_sequence|gi|512478017|ref|NZ_KE150417.1|	0.056	99.944	801	1428963	1429764
Geobacillus_#_sp._!_C56-T3_{_chromosome_}_complete_genome|gi|297528376|ref|NC_014206.1|	0.022	99.978	800	3650013	3650813
Geobacillus_#_sp._!_Y412MC52_{_chromosome_}_complete_genome|gi|319765157|ref|NC_014915.1|	0.022	99.978	800	3628083	3628883
Staphylococcus_#_aureus_!_HI013_{_genomic_}_scaffold_acqwl-supercont1.3_whole_genome_shotgun_sequence|gi|486215850|ref|NZ_KB820900.1|	0.704	99.296	800	112866	113666
Staphylococcus_#_aureus_!_M0270_{_genomic_}_scaffold_acrGX-supercont1.5_whole_genome_shotgun_sequence|gi|487374986|ref|NZ_KB821162.1|	0.238	99.762	800	334943	335743
Staphylococcus_#_aureus_!_M0877_{_genomic_}_scaffold_acumt-supercont1.4_whole_genome_shotgun_sequence|gi|487385165|ref|NZ_KB821717.1|	0.458	99.542	800	173777	174577
Staphylococcus_#_aureus_!_M1064_{_genomic_}_scaffold_acumU-supercont1.8_whole_genome_shotgun_sequence|gi|486421189|ref|NZ_KB821944.1|	0.665	99.335	800	119439	120239
Staphylococcus_#_aureus_!_M1223_{_genomic_}_scaffold_acune-supercont1.4_whole_genome_shotgun_sequence|gi|487396450|ref|NZ_KB822074.1|	0.706	99.294	800	112569	113369
Staphylococcus_#_aureus_!_M1407_{_genomic_}_scaffold_acuod-supercont1.3_whole_genome_shotgun_sequence|gi|487401610|ref|NZ_KB822381.1|	0.213	99.787	800	374021	374821
Staphylococcus_#_aureus_!_M1544_{_genomic_}_scaffold_acunm-supercont1.5_whole_genome_shotgun_sequence|gi|487139035|ref|NZ_KB822280.1|	0.114	99.886	800	698896	699696
Staphylococcus_#_aureus_!_subsp._{_aureus_}_Btn1260_genomic_scaffold_supercont1.4_whole_genome_shotgun_sequence|gi|282904894|ref|NZ_GG730259.1|	0.301	99.699	800	265202	266002
Staphylococcus_#_aureus_!_subsp._{_aureus_}_68-397_genomic_scaffold_supercont1.3_whole_genome_shotgun_sequence|gi|257429933|ref|NZ_GG700576.1|	14.855	85.145	779	4465	5244
Staphylococcus_#_aureus_!_subsp._{_aureus_}_A017934/97_genomic_scaffold_supercont1.4_whole_genome_shotgun_sequence|gi|283957309|ref|NZ_GG731498.1|	13.579	86.421	779	4958	5737
Staphylococcus_#_aureus_!_subsp._{_aureus_}_C101_genomic_scaffold_supercont1.4_whole_genome_shotgun_sequence|gi|282923126|ref|NZ_GG730123.1|	13.986	86.014	779	4791	5570
Staphylococcus_#_aureus_!_subsp._{_aureus_}_C160_genomic_scaffold_supercont1.22_whole_genome_shotgun_sequence|gi|282904834|ref|NZ_GG730294.1|	12.762	87.238	779	5325	6104
Staphylococcus_#_aureus_!_subsp._{_aureus_}_C427_genomic_scaffold_supercont1.4_whole_genome_shotgun_sequence|gi|282918299|ref|NZ_GG730144.1|	13.869	86.131	779	4838	5617
Staphylococcus_#_aureus_!_subsp._{_aureus_}_D139_genomic_scaffold_supercont1.8_whole_genome_shotgun_sequence|gi|282915836|ref|NZ_GG730166.1|	15.001	84.999	779	4414	5193
Staphylococcus_#_aureus_!_subsp._{_aureus_}_E1410_genomic_scaffold_supercont1.4_whole_genome_shotgun_sequence|gi|257432635|ref|NZ_GG700600.1|	14.509	85.491	779	4590	5369
Staphylococcus_#_aureus_!_subsp._{_aureus_}_H19_genomic_scaffold_supercont1.5_whole_genome_shotgun_sequence|gi|283769454|ref|NZ_GG730339.1|	14.447	85.553	779	4613	5392
Staphylococcus_#_aureus_!_subsp._{_aureus_}_M876_genomic_scaffold_supercont1.4_whole_genome_shotgun_sequence|gi|257435539|ref|NZ_GG700617.1|	14.687	85.313	779	4525	5304
Staphylococcus_#_aureus_!_subsp._{_aureus_}_WBG10049_genomic_scaffold_supercont1.2_whole_genome_shotgun_sequence|gi|282910156|ref|NZ_GG730209.1|	14.407	85.593	779	4628	5407
Staphylococcus_#_aureus_!_subsp._{_aureus_}_WW2703/97_genomic_scaffold_supercont1.7_whole_genome_shotgun_sequence|gi|282907840|ref|NZ_GG730226.1|	15.353	84.647	779	4295	5074
Staphylococcus_#_epidermidis_!_M23864:W2(grey)_{_genomic_}_scaffold_SCAFFOLD1_whole_genome_shotgun_sequence|gi|293368503|ref|NZ_GG749255.1|	0.046	99.954	770	1664919	1665689
Staphylococcus_#_lugdunensis_!_ACS-027-V-Sch2_{_genomic_}_scaffold_supercont1.3_whole_genome_shotgun_sequence|gi|448879135|ref|NZ_KB373324.1|	0.206	99.794	726	352198	352924
Staphylococcus_#_aureus_!_M0192_{_genomic_}_scaffold_acqyc-supercont1.3_whole_genome_shotgun_sequence|gi|486255208|ref|NZ_KB821076.1|	0.03	99.97	702	2314066	2314768
Staphylococcus_#_aureus_!_subsp._{_aureus_}_MRSA177_genomic_scaffold_Scfld514_whole_genome_shotgun_sequence|gi|422744608|ref|NZ_GL638244.1|	1.521	98.479	702	45454	46156
Staphylococcus_#_aureus_!_M0408_{_genomic_}_scaffold_acrHk-supercont1.3_whole_genome_shotgun_sequence|gi|486295120|ref|NZ_KB821328.1|	0.406	99.594	701	172095	172796
Staphylococcus_#_aureus_!_M0628_{_genomic_}_scaffold_acuno-supercont-complete_whole_genome_shotgun_sequence|gi|486412957|ref|NZ_KB821506.1|	0.025	99.975	701	2827735	2828436
Staphylococcus_#_aureus_!_M0946_{_genomic_}_scaffold_acunJ-supercont1.5_whole_genome_shotgun_sequence|gi|487388055|ref|NZ_KB821790.1|	0.287	99.713	701	243511	244212
Staphylococcus_#_aureus_!_M1322_{_genomic_}_scaffold_acumT-supercont1.2_whole_genome_shotgun_sequence|gi|486956393|ref|NZ_KB822201.1|	0.027	99.973	701	2595903	2596604
Staphylococcus_#_aureus_!_M1407_{_genomic_}_scaffold_acuod-supercont1.2_whole_genome_shotgun_sequence|gi|487401590|ref|NZ_KB822380.1|	0.083	99.917	701	840948	841649
Staphylococcus_#_aureus_!_subsp._{_aureus_}_55/2053_genomic_scaffold_supercont1.4_whole_genome_shotgun_sequence|gi|257425046|ref|NZ_GG700536.1|	0.4	99.6	701	174678	175379
Staphylococcus_#_aureus_!_subsp._{_aureus_}_C101_genomic_scaffold_supercont1.12_whole_genome_shotgun_sequence|gi|282924788|ref|NZ_GG730131.1|	0.294	99.706	701	237330	238031
Staphylococcus_#_aureus_!_subsp._{_aureus_}_EMRSA16_genomic_scaffold_supercont1.13_whole_genome_shotgun_sequence|gi|295428232|ref|NZ_GG770525.1|	0.297	99.703	701	235382	236083
Staphylococcus_#_aureus_!_subsp._{_aureus_}_M1015_genomic_scaffold_supercont1.11_whole_genome_shotgun_sequence|gi|293537077|ref|NZ_GG749006.1|	0.294	99.706	701	237670	238371
Staphylococcus_#_aureus_!_subsp._{_aureus_}_M1015_genomic_scaffold_supercont1.7_whole_genome_shotgun_sequence|gi|293526792|ref|NZ_GG749002.1|	0.708	99.292	701	98291	98992
Staphylococcus_#_aureus_!_subsp._{_aureus_}_M809_genomic_scaffold_supercont1.10_whole_genome_shotgun_sequence|gi|293509762|ref|NZ_GG749308.1|	0.339	99.661	701	206296	206997
Staphylococcus_#_aureus_!_subsp._{_aureus_}_M809_genomic_scaffold_supercont1.14_whole_genome_shotgun_sequence|gi|293510534|ref|NZ_GG749312.1|	0.295	99.705	701	236999	237700
Bacillus_#_amyloliquefaciens_!_LL3_{_chromosome_}_complete_genome|gi|384162404|ref|NC_017190.1|	0.018	99.982	700	3994527	3995227
Bacillus_#_amyloliquefaciens_!_XH7_{_chromosome_}_complete_genome|gi|384166624|ref|NC_017191.1|	0.018	99.982	700	3938503	3939203
Bacillus_#_atrophaeus_!_1942_{_chromosome_}_complete_genome|gi|311066968|ref|NC_014639.1|	0.017	99.983	700	4167566	4168266
Bacillus_#_licheniformis_!_9945A_{_complete_}_genome|gi|511060863|ref|NC_021362.1|	0.016	99.984	700	4375605	4376305
Bacillus_#_licheniformis_!_ATCC_{_14580_}_chromosome_complete_genome|gi|163119169|ref|NC_006270.3|	0.017	99.983	700	4221897	4222597
Geobacillus_#_thermodenitrificans_!_NG80-2_{_chromosome_}_complete_genome|gi|138893679|ref|NC_009328.1|	0.02	99.98	700	3549619	3550319
Halobacillus_#_halophilus_!_DSM_{_2266_}_complete_genome|gi|386712343|ref|NC_017668.1|	0.017	99.983	700	4149932	4150632
Lactobacillus_#_sanfranciscensis_!_TMW_{_1.1304_}_chromosome_complete_genome|gi|347533753|ref|NC_015978.1|	0.054	99.946	700	1297616	1298316
Staphylococcus_#_aureus_!_M0001_{_genomic_}_scaffold_acrHn-supercont1.15_whole_genome_shotgun_sequence|gi|486217883|ref|NZ_KB820933.1|	2.559	97.441	700	26651	27351
Staphylococcus_#_aureus_!_M0060_{_genomic_}_scaffold_acrGU-supercont1.4_whole_genome_shotgun_sequence|gi|487336408|ref|NZ_KB820987.1|	0.154	99.846	700	452904	453604
Staphylococcus_#_aureus_!_M0197_{_genomic_}_scaffold_acrGV-supercont1.3_whole_genome_shotgun_sequence|gi|486257669|ref|NZ_KB821086.1|	0.135	99.865	700	516089	516789
Staphylococcus_#_aureus_!_M0404_{_genomic_}_scaffold_acrGQ-supercont1.6_whole_genome_shotgun_sequence|gi|487378947|ref|NZ_KB821307.1|	0.048	99.952	700	1470508	1471208
Staphylococcus_#_aureus_!_M0450_{_genomic_}_scaffold_acqwq-supercont1.2_whole_genome_shotgun_sequence|gi|486302143|ref|NZ_KB821344.1|	0.109	99.891	700	644303	645003
Staphylococcus_#_aureus_!_M0529_{_genomic_}_scaffold_acumA-supercont1.3_whole_genome_shotgun_sequence|gi|486414273|ref|NZ_KB821433.1|	0.15	99.85	700	464561	465261
Staphylococcus_#_aureus_!_M1244_{_genomic_}_scaffold_acumu-supercont1.3_whole_genome_shotgun_sequence|gi|487397020|ref|NZ_KB822092.1|	0.41	99.59	700	170155	170855
Staphylococcus_#_aureus_!_subsp._{_aureus_}_D139_genomic_scaffold_supercont1.20_whole_genome_shotgun_sequence|gi|282917134|ref|NZ_GG730178.1|	0.392	99.608	700	177754	178454
Staphylococcus_#_aureus_!_subsp._{_aureus_}_WW2703/97_genomic_scaffold_supercont1.36_whole_genome_shotgun_sequence|gi|282909938|ref|NZ_GG730255.1|	0.333	99.667	700	209317	210017
Staphylococcus_#_lugdunensis_!_N920143_{_complete_}_genome|gi|385782956|ref|NC_017353.1|	0.027	99.973	700	2595188	2595888
Staphylococcus_#_epidermidis_!_W23144_{_genomic_}_scaffold_SCAFFOLD5_whole_genome_shotgun_sequence|gi|254212923|ref|NZ_GG696803.1|	0.278	99.722	670	240172	240842
Staphylococcus_#_aureus_!_M0329_{_genomic_}_scaffold_acrHa-supercont1.7_whole_genome_shotgun_sequence|gi|486275406|ref|NZ_KB821231.1|	0.065	99.935	602	930243	930845
Staphylococcus_#_aureus_!_M0528_{_genomic_}_scaffold_acvqo-supercont1.7_whole_genome_shotgun_sequence|gi|486339825|ref|NZ_KB821428.1|	0.091	99.909	601	660396	660997
Staphylococcus_#_aureus_!_M0673_{_genomic_}_scaffold_acumv-supercont1.3_whole_genome_shotgun_sequence|gi|487382473|ref|NZ_KB821564.1|	0.073	99.927	601	819059	819660
Staphylococcus_#_aureus_!_M0953_{_genomic_}_scaffold_acvql-supercont1.2_whole_genome_shotgun_sequence|gi|486396452|ref|NZ_KB821796.1|	0.042	99.958	601	1420496	1421097
Staphylococcus_#_aureus_!_M1193_{_genomic_}_scaffold_acunb-supercont1.1_whole_genome_shotgun_sequence|gi|487401055|ref|NZ_KB822373.1|	0.021	99.979	601	2844333	2844934
Staphylococcus_#_aureus_!_M1215_{_genomic_}_scaffold_aculX-supercont1.1_whole_genome_shotgun_sequence|gi|486506047|ref|NZ_KB822069.1|	0.021	99.979	601	2826829	2827430
Staphylococcus_#_aureus_!_M1275_{_genomic_}_scaffold_acumX-supercont1.5_whole_genome_shotgun_sequence|gi|487397737|ref|NZ_KB822134.1|	0.026	99.974	601	2311442	2312043
Staphylococcus_#_aureus_!_M1563_{_genomic_}_scaffold_acuoe-supercont1.3_whole_genome_shotgun_sequence|gi|487158594|ref|NZ_KB822306.1|	0.053	99.947	601	1139973	1140574
Staphylococcus_#_aureus_!_subsp._{_aureus_}_68-397_genomic_scaffold_supercont1.11_whole_genome_shotgun_sequence|gi|257431076|ref|NZ_GG700584.1|	0.264	99.736	601	226795	227396
Staphylococcus_#_aureus_!_subsp._{_aureus_}_C101_genomic_scaffold_supercont1.20_whole_genome_shotgun_sequence|gi|282925650|ref|NZ_GG730139.1|	0.167	99.833	601	359389	359990
Staphylococcus_#_aureus_!_subsp._{_aureus_}_M899_genomic_scaffold_supercont1.17_whole_genome_shotgun_sequence|gi|282915018|ref|NZ_GG730206.1|	0.165	99.835	601	363764	364365
Staphylococcus_#_aureus_!_subsp._{_aureus_}_TCH130_genomic_scaffold_SCAFFOLD4_whole_genome_shotgun_sequence|gi|255925766|ref|NZ_GG698161.1|	0.296	99.704	601	202607	203208
Staphylococcus_#_aureus_!_subsp._{_aureus_}_WW2703/97_genomic_scaffold_supercont1.35_whole_genome_shotgun_sequence|gi|282909609|ref|NZ_GG730254.1|	0.17	99.83	601	352814	353415
Amphibacillus_#_xylanus_!_NBRC_{_15112_}_complete_genome|gi|408355363|ref|NC_018704.1|	0.023	99.977	600	2568886	2569486
Bacillus_#_amyloliquefaciens_!_TA208_{_chromosome_}_complete_genome|gi|384157612|ref|NC_017188.1|	0.015	99.985	600	3936911	3937511
Geobacillus_#_sp._!_GHH01_{_complete_}_genome|gi|448236310|ref|NC_020210.1|	0.017	99.983	600	3582534	3583134
Staphylococcus_#_aureus_!_M0237_{_genomic_}_scaffold_acrHd-supercont1.2_whole_genome_shotgun_sequence|gi|486261107|ref|NZ_KB821134.1|	0.112	99.888	600	537138	537738
Staphylococcus_#_aureus_!_M0240_{_genomic_}_scaffold_acqwO-supercont1.9_whole_genome_shotgun_sequence|gi|487374622|ref|NZ_KB821153.1|	0.252	99.748	600	237558	238158
Staphylococcus_#_aureus_!_M0329_{_genomic_}_scaffold_acrHa-supercont1.6_whole_genome_shotgun_sequence|gi|486274654|ref|NZ_KB821230.1|	0.075	99.925	600	802014	802614
Staphylococcus_#_aureus_!_M0391_{_genomic_}_scaffold_acqwG-supercont1.8_whole_genome_shotgun_sequence|gi|486292280|ref|NZ_KB821316.1|	0.262	99.738	600	228673	229273
Staphylococcus_#_aureus_!_M0529_{_genomic_}_scaffold_acumA-supercont1.1_whole_genome_shotgun_sequence|gi|486413843|ref|NZ_KB821431.1|	0.031	99.969	600	1913918	1914518
Staphylococcus_#_aureus_!_M0584_{_genomic_}_scaffold_acunu-supercont1.3_whole_genome_shotgun_sequence|gi|487371238|ref|NZ_KB821491.1|	0.052	99.948	600	1149775	1150375
Staphylococcus_#_aureus_!_M0695_{_genomic_}_scaffold_acunx-supercont1.7_whole_genome_shotgun_sequence|gi|489045046|ref|NZ_KB821612.1|	2.935	97.065	600	19846	20446
Staphylococcus_#_aureus_!_M0822_{_genomic_}_scaffold_acunB-supercont1.7_whole_genome_shotgun_sequence|gi|487383827|ref|NZ_KB821686.1|	0.065	99.935	600	927796	928396
Staphylococcus_#_aureus_!_M0946_{_genomic_}_scaffold_acunJ-supercont1.2_whole_genome_shotgun_sequence|gi|487387889|ref|NZ_KB821787.1|	0.131	99.869	600	457888	458488
Staphylococcus_#_aureus_!_M1103_{_genomic_}_scaffold_acump-supercont1.1_whole_genome_shotgun_sequence|gi|486428532|ref|NZ_KB822034.1|	0.031	99.969	600	1963179	1963779
Staphylococcus_#_aureus_!_M1244_{_genomic_}_scaffold_acumu-supercont1.1_whole_genome_shotgun_sequence|gi|487396874|ref|NZ_KB822086.1|	0.191	99.809	600	313191	313791
Staphylococcus_#_aureus_!_M1450_{_genomic_}_scaffold_acumw-supercont1.7_whole_genome_shotgun_sequence|gi|487135036|ref|NZ_KB822238.1|	0.043	99.957	600	1406362	1406962
Staphylococcus_#_aureus_!_M1563_{_genomic_}_scaffold_acuoe-supercont1.1_whole_genome_shotgun_sequence|gi|487146604|ref|NZ_KB822304.1|	0.085	99.915	600	707616	708216
Staphylococcus_#_aureus_!_M1563_{_genomic_}_scaffold_acuoe-supercont1.5_whole_genome_shotgun_sequence|gi|487162436|ref|NZ_KB822308.1|	0.158	99.842	600	378401	379001
Staphylococcus_#_aureus_!_plasmid_{_SAP014A_}_complete_sequence|gi|260666135|ref|NC_013320.1|	1.19	98.81	600	49829	50429
Staphylococcus_#_aureus_!_plasmid_{_pGO1_}_complete_sequence|gi|226464389|ref|NC_012547.1|	1.111	98.889	600	53400	54000
Staphylococcus_#_aureus_!_subsp._{_aureus_}_68-397_genomic_scaffold_supercont1.5_whole_genome_shotgun_sequence|gi|257430207|ref|NZ_GG700578.1|	0.461	99.539	600	129605	130205
Staphylococcus_#_aureus_!_subsp._{_aureus_}_EMRSA16_genomic_scaffold_supercont1.3_whole_genome_shotgun_sequence|gi|295426606|ref|NZ_GG770515.1|	0.132	99.868	600	453633	454233
Staphylococcus_#_aureus_!_subsp._{_aureus_}_MRSA177_genomic_scaffold_Scfld78_whole_genome_shotgun_sequence|gi|422743378|ref|NZ_GL638219.1|	2.626	97.374	600	22251	22851
Staphylococcus_#_aureus_!_subsp._{_aureus_}_TCH130_genomic_scaffold_SCAFFOLD5_whole_genome_shotgun_sequence|gi|255925767|ref|NZ_GG698162.1|	0.562	99.438	600	106254	106854
Staphylococcus_#_aureus_!_subsp._{_aureus_}_ATCC_51811_genomic_scaffold_SCAFFOLD3_whole_genome_shotgun_sequence|gi|297210121|ref|NZ_GG774482.1|	0.46	99.54	599	129568	130167
Staphylococcus_#_hominis_!_subsp._{_hominis_}_C80_genomic_scaffold_supercont1.5_whole_genome_shotgun_sequence|gi|314935894|ref|NZ_GL545256.1|	8.378	91.622	526	5752	6278
Staphylococcus_#_aureus_!_subsp._{_aureus_}_M809_genomic_scaffold_supercont1.6_whole_genome_shotgun_sequence|gi|293509336|ref|NZ_GG749304.1|	16.629	83.371	513	2572	3085
Staphylococcus_#_epidermidis_!_M23864:W2(grey)_{_genomic_}_scaffold_SCAFFOLD4_whole_genome_shotgun_sequence|gi|293368506|ref|NZ_GG749258.1|	9.786	90.214	513	4729	5242
Staphylococcus_#_epidermidis_!_W23144_{_genomic_}_scaffold_SCAFFOLD9_whole_genome_shotgun_sequence|gi|254212927|ref|NZ_GG696807.1|	10.211	89.789	513	4511	5024
Staphylococcus_#_aureus_!_M1068_{_genomic_}_scaffold_acunM-supercont1.3_whole_genome_shotgun_sequence|gi|487394470|ref|NZ_KB821929.1|	0.062	99.938	502	804461	804963
Staphylococcus_#_aureus_!_M0622_{_genomic_}_scaffold_acvqA-supercont1.3_whole_genome_shotgun_sequence|gi|486362492|ref|NZ_KB821504.1|	0.025	99.975	501	1989535	1990036
Staphylococcus_#_aureus_!_M0943_{_genomic_}_scaffold_acvqw-supercont1.3_whole_genome_shotgun_sequence|gi|486391432|ref|NZ_KB821767.1|	0.048	99.952	501	1041050	1041551
Staphylococcus_#_aureus_!_M1036_{_genomic_}_scaffold_acvqI-supercont1.4_whole_genome_shotgun_sequence|gi|486407993|ref|NZ_KB821865.1|	0.08	99.92	501	624288	624789
Staphylococcus_#_aureus_!_M1255_{_genomic_}_scaffold_acunA-supercont1.3_whole_genome_shotgun_sequence|gi|486684463|ref|NZ_KB822118.1|	0.04	99.96	501	1262142	1262643
Bacillus_#_cereus_!_MC67_{_genomic_}_scaffold_supercont1.1_whole_genome_shotgun_sequence|gi|423554795|ref|NZ_JH792113.1|	0.018	99.982	500	2809159	2809659
Staphylococcus_#_aureus_!_M0102_{_genomic_}_scaffold_acqwC-supercont1.5_whole_genome_shotgun_sequence|gi|486240844|ref|NZ_KB821010.1|	0.278	99.722	500	179599	180099
Staphylococcus_#_aureus_!_M0177_{_genomic_}_scaffold_acumi-supercont1.5_whole_genome_shotgun_sequence|gi|487360174|ref|NZ_KB821082.1|	0.047	99.953	500	1069276	1069776
Staphylococcus_#_aureus_!_M0237_{_genomic_}_scaffold_acrHd-supercont1.3_whole_genome_shotgun_sequence|gi|486261301|ref|NZ_KB821135.1|	0.076	99.924	500	654586	655086
Staphylococcus_#_aureus_!_M0329_{_genomic_}_scaffold_acrHa-supercont1.8_whole_genome_shotgun_sequence|gi|486276071|ref|NZ_KB821232.1|	0.554	99.446	500	89708	90208
Staphylococcus_#_aureus_!_M0364_{_genomic_}_scaffold_acqwM-supercont1.6_whole_genome_shotgun_sequence|gi|486288766|ref|NZ_KB821269.1|	0.068	99.932	500	732190	732690
Staphylococcus_#_aureus_!_M0529_{_genomic_}_scaffold_acumA-supercont1.4_whole_genome_shotgun_sequence|gi|486414553|ref|NZ_KB821434.1|	0.107	99.893	500	467807	468307
Staphylococcus_#_aureus_!_M1092_{_genomic_}_scaffold_acunK-supercont1.1_whole_genome_shotgun_sequence|gi|486421969|ref|NZ_KB821957.1|	0.042	99.958	500	1198671	1199171
Staphylococcus_#_aureus_!_subsp._{_aureus_}_58-424_genomic_scaffold_supercont1.13_whole_genome_shotgun_sequence|gi|293507733|ref|NZ_GG749066.1|	0.29	99.71	500	171701	172201
Staphylococcus_#_aureus_!_subsp._{_aureus_}_D139_genomic_scaffold_supercont1.12_whole_genome_shotgun_sequence|gi|282915991|ref|NZ_GG730170.1|	0.259	99.741	500	192409	192909
Staphylococcus_#_aureus_!_subsp._{_aureus_}_E1410_genomic_scaffold_supercont1.14_whole_genome_shotgun_sequence|gi|257433992|ref|NZ_GG700610.1|	0.291	99.709	500	171108	171608
Staphylococcus_#_aureus_!_subsp._{_aureus_}_EMRSA16_genomic_scaffold_supercont1.6_whole_genome_shotgun_sequence|gi|295427053|ref|NZ_GG770518.1|	0.277	99.723	500	180270	180770
Staphylococcus_#_aureus_!_subsp._{_aureus_}_M809_genomic_scaffold_supercont1.20_whole_genome_shotgun_sequence|gi|293510892|ref|NZ_GG749318.1|	0.458	99.542	500	108606	109106
Staphylococcus_#_aureus_!_subsp._{_aureus_}_MRSA131_genomic_scaffold_Scfld119_whole_genome_shotgun_sequence|gi|422745916|ref|NZ_GL638179.1|	0.684	99.316	500	72618	73118
Staphylococcus_#_aureus_!_subsp._{_aureus_}_MRSA177_genomic_scaffold_Scfld60_whole_genome_shotgun_sequence|gi|422742955|ref|NZ_GL638212.1|	0.685	99.315	500	72518	73018
Staphylococcus_#_aureus_!_subsp._{_aureus_}_USA300_TCH959_genomic_scaffold_SCAFFOLD4_whole_genome_shotgun_sequence|gi|255926320|ref|NZ_GG697988.1|	0.455	99.545	500	109274	109774
Staphylococcus_#_aureus_!_subsp._{_aureus_}_WW2703/97_genomic_scaffold_supercont1.14_whole_genome_shotgun_sequence|gi|282908455|ref|NZ_GG730233.1|	0.297	99.703	500	167614	168114
Staphylococcus_#_aureus_!_subsp._{_aureus_}_WW2703/97_genomic_scaffold_supercont1.29_whole_genome_shotgun_sequence|gi|282909374|ref|NZ_GG730248.1|	0.442	99.558	500	112728	113228
Staphylococcus_#_aureus_!_subsp._{_aureus_}_WW2703/97_genomic_scaffold_supercont1.2_whole_genome_shotgun_sequence|gi|282907462|ref|NZ_GG730221.1|	0.154	99.846	500	323203	323703
Staphylococcus_#_epidermidis_!_BCM-HMP0060_{_genomic_}_scaffold_SCAFFOLD5_whole_genome_shotgun_sequence|gi|254281374|ref|NZ_GG696731.1|	7.991	92.009	413	4755	5168
Staphylococcus_#_epidermidis_!_BVS058A4_{_genomic_}_scaffold_supercont1.2_whole_genome_shotgun_sequence|gi|448879115|ref|NZ_KB373336.1|	0.049	99.951	413	841725	842138
Staphylococcus_#_aureus_!_M0154_{_genomic_}_scaffold_acumB-supercont1.8_whole_genome_shotgun_sequence|gi|487359822|ref|NZ_KB821052.1|	0.028	99.972	402	1437565	1437967
Staphylococcus_#_aureus_!_M1083_{_genomic_}_scaffold_acumj-supercont1.3_whole_genome_shotgun_sequence|gi|487394817|ref|NZ_KB821969.1|	0.059	99.941	402	681531	681933
Staphylococcus_#_aureus_!_M1374_{_genomic_}_scaffold_acumR-supercont1.3_whole_genome_shotgun_sequence|gi|487398639|ref|NZ_KB822221.1|	0.05	99.95	402	804836	805238
Staphylococcus_#_aureus_!_M1451_{_genomic_}_scaffold_acunE-supercont1.4_whole_genome_shotgun_sequence|gi|480457480|ref|NZ_KB822244.1|	0.021	99.979	402	1954315	1954717
Staphylococcus_#_aureus_!_B40723_{_genomic_}_scaffold_acqwm-supercont1.7_whole_genome_shotgun_sequence|gi|486327730|ref|NZ_KB822333.1|	0.028	99.972	401	1424883	1425284
Staphylococcus_#_aureus_!_M0102_{_genomic_}_scaffold_acqwC-supercont1.4_whole_genome_shotgun_sequence|gi|486240581|ref|NZ_KB821009.1|	0.029	99.971	401	1375637	1376038
Staphylococcus_#_aureus_!_M0237_{_genomic_}_scaffold_acrHd-supercont1.4_whole_genome_shotgun_sequence|gi|486261514|ref|NZ_KB821136.1|	0.044	99.956	401	905338	905739
Staphylococcus_#_aureus_!_M0330_{_genomic_}_scaffold_acqxt-supercont1.2_whole_genome_shotgun_sequence|gi|486278717|ref|NZ_KB821221.1|	0.015	99.985	401	2650024	2650425
Staphylococcus_#_aureus_!_M0347_{_genomic_}_scaffold_acqxu-supercont1.3_whole_genome_shotgun_sequence|gi|486284496|ref|NZ_KB821248.1|	0.017	99.983	401	2363562	2363963
Staphylococcus_#_aureus_!_M0351_{_genomic_}_scaffold_acunV-supercont1.7_whole_genome_shotgun_sequence|gi|487364468|ref|NZ_KB821261.1|	0.028	99.972	401	1436430	1436831
Staphylococcus_#_aureus_!_M0374_{_genomic_}_scaffold_aculK-supercont1.1_whole_genome_shotgun_sequence|gi|487365394|ref|NZ_KB821278.1|	0.038	99.962	401	1045049	1045450
Staphylococcus_#_aureus_!_M0584_{_genomic_}_scaffold_acunu-supercont1.2_whole_genome_shotgun_sequence|gi|487370984|ref|NZ_KB821490.1|	0.033	99.967	401	1213414	1213815
Staphylococcus_#_aureus_!_M0998_{_genomic_}_scaffold_acvqv-supercont1.1_whole_genome_shotgun_sequence|gi|486398090|ref|NZ_KB821813.1|	0.028	99.972	401	1454826	1455227
Staphylococcus_#_aureus_!_M1092_{_genomic_}_scaffold_acunK-supercont1.4_whole_genome_shotgun_sequence|gi|486422720|ref|NZ_KB821960.1|	0.037	99.963	401	1088281	1088682
Staphylococcus_#_aureus_!_M1359_{_genomic_}_scaffold_acumL-supercont1.2_whole_genome_shotgun_sequence|gi|486991067|ref|NZ_KB822205.1|	0.047	99.953	401	861705	862106
Staphylococcus_#_aureus_!_M1394_{_genomic_}_scaffold_acuny-supercont1.1_whole_genome_shotgun_sequence|gi|487083277|ref|NZ_KB822228.1|	0.014	99.986	401	2816039	2816440
Staphylococcus_#_aureus_!_M1481_{_genomic_}_scaffold_aculQ-supercont1.2_whole_genome_shotgun_sequence|gi|487136608|ref|NZ_KB822249.1|	0.038	99.962	401	1061429	1061830
Staphylococcus_#_aureus_!_subsp._{_aureus_}_D139_genomic_scaffold_supercont1.5_whole_genome_shotgun_sequence|gi|282915706|ref|NZ_GG730163.1|	0.477	99.523	401	83690	84091
Bacillus_#_anthracis_!_str._{_A0248_}_complete_genome|gi|229599883|ref|NC_012659.1|	0.008	99.992	400	5227019	5227419
Bacillus_#_cereus_!_BAG2O-1_{_genomic_}_scaffold_acfXE-supercont1.1_whole_genome_shotgun_sequence|gi|507003759|ref|NZ_KB976517.1|	0.008	99.992	400	5302448	5302848
Bacillus_#_cereus_!_BAG2O-2_{_genomic_}_scaffold_supercont1.1_whole_genome_shotgun_sequence|gi|514983440|ref|NZ_KE332507.1|	0.008	99.992	400	5275909	5276309
Bacillus_#_cereus_!_BAG6X1-1_{_genomic_}_scaffold_supercont1.1_whole_genome_shotgun_sequence|gi|423474542|ref|NZ_JH804637.1|	0.008	99.992	400	4987254	4987654
Staphylococcus_#_aureus_!_HI168_{_genomic_}_scaffold_acqxp-supercont1.2_whole_genome_shotgun_sequence|gi|486212564|ref|NZ_KB820920.1|	0.969	99.031	400	40894	41294
Staphylococcus_#_aureus_!_M0001_{_genomic_}_scaffold_acrHn-supercont1.14_whole_genome_shotgun_sequence|gi|486217861|ref|NZ_KB820932.1|	3.598	96.402	400	10717	11117
Staphylococcus_#_aureus_!_M0045_{_genomic_}_scaffold_acqxU-supercont1.3_whole_genome_shotgun_sequence|gi|486231608|ref|NZ_KB820971.1|	0.018	99.982	400	2248417	2248817
Staphylococcus_#_aureus_!_M0060_{_genomic_}_scaffold_acrGU-supercont1.7_whole_genome_shotgun_sequence|gi|487344359|ref|NZ_KB820990.1|	0.567	99.433	400	70156	70556
Staphylococcus_#_aureus_!_M0102_{_genomic_}_scaffold_acqwC-supercont1.1_whole_genome_shotgun_sequence|gi|486239304|ref|NZ_KB821006.1|	0.114	99.886	400	351011	351411
Staphylococcus_#_aureus_!_M0197_{_genomic_}_scaffold_acrGV-supercont1.1_whole_genome_shotgun_sequence|gi|486256732|ref|NZ_KB821084.1|	0.021	99.979	400	1932376	1932776
Staphylococcus_#_aureus_!_M0197_{_genomic_}_scaffold_acrGV-supercont1.5_whole_genome_shotgun_sequence|gi|486257904|ref|NZ_KB821088.1|	0.668	99.332	400	59441	59841
Staphylococcus_#_aureus_!_M0270_{_genomic_}_scaffold_acrGX-supercont1.6_whole_genome_shotgun_sequence|gi|487375023|ref|NZ_KB821163.1|	0.237	99.763	400	168101	168501
Staphylococcus_#_aureus_!_M0279_{_genomic_}_scaffold_acqxn-supercont1.3_whole_genome_shotgun_sequence|gi|487376092|ref|NZ_KB821176.1|	0.036	99.964	400	1114074	1114474
Staphylococcus_#_aureus_!_M0347_{_genomic_}_scaffold_acqxu-supercont1.2_whole_genome_shotgun_sequence|gi|486282563|ref|NZ_KB821247.1|	0.082	99.918	400	486646	487046
Staphylococcus_#_aureus_!_M0391_{_genomic_}_scaffold_acqwG-supercont1.1_whole_genome_shotgun_sequence|gi|486290024|ref|NZ_KB821309.1|	0.036	99.964	400	1120922	1121322
Staphylococcus_#_aureus_!_M0404_{_genomic_}_scaffold_acrGQ-supercont1.5_whole_genome_shotgun_sequence|gi|487378809|ref|NZ_KB821306.1|	0.229	99.771	400	174569	174969
Staphylococcus_#_aureus_!_M0946_{_genomic_}_scaffold_acunJ-supercont1.7_whole_genome_shotgun_sequence|gi|487388174|ref|NZ_KB821792.1|	0.378	99.622	400	105327	105727
Staphylococcus_#_aureus_!_M1007_{_genomic_}_scaffold_acvqZ-supercont1.2_whole_genome_shotgun_sequence|gi|486400600|ref|NZ_KB821830.1|	0.925	99.075	400	42855	43255
Staphylococcus_#_aureus_!_M1015_{_genomic_}_scaffold_acvqH-supercont1.3_whole_genome_shotgun_sequence|gi|486404102|ref|NZ_KB821836.1|	0.148	99.852	400	269411	269811
Staphylococcus_#_aureus_!_M1061_{_genomic_}_scaffold_aculN-supercont1.9_whole_genome_shotgun_sequence|gi|487393922|ref|NZ_KB821900.1|	0.076	99.924	400	527709	528109
Staphylococcus_#_aureus_!_M1359_{_genomic_}_scaffold_acumL-supercont1.1_whole_genome_shotgun_sequence|gi|486986178|ref|NZ_KB822204.1|	0.02	99.98	400	2028969	2029369
Staphylococcus_#_aureus_!_M1407_{_genomic_}_scaffold_acuod-supercont1.1_whole_genome_shotgun_sequence|gi|487401530|ref|NZ_KB822379.1|	0.025	99.975	400	1618545	1618945
Staphylococcus_#_aureus_!_M1510_{_genomic_}_scaffold_aculM-supercont1.1_whole_genome_shotgun_sequence|gi|487399328|ref|NZ_KB822257.1|	0.089	99.911	400	450117	450517
Staphylococcus_#_aureus_!_M1531_{_genomic_}_scaffold_acunL-supercont1.3_whole_genome_shotgun_sequence|gi|487137976|ref|NZ_KB822265.1|	0.871	99.129	400	45526	45926
Staphylococcus_#_aureus_!_plasmid_{_SAP077B_}_complete_sequence|gi|260667563|ref|NC_013341.1|	2.998	97.002	400	12942	13342
Staphylococcus_#_aureus_!_plasmid_{_pSK41_}_complete_sequence|gi|32470385|ref|NC_005024.1|	0.861	99.139	400	46045	46445
Staphylococcus_#_aureus_!_subsp._{_aureus_}_55/2053_genomic_scaffold_supercont1.15_whole_genome_shotgun_sequence|gi|257426198|ref|NZ_GG700547.1|	0.363	99.637	400	109872	110272
Staphylococcus_#_aureus_!_subsp._{_aureus_}_58-424_genomic_scaffold_supercont1.17_whole_genome_shotgun_sequence|gi|293508980|ref|NZ_GG749070.1|	0.363	99.637	400	109842	110242
Staphylococcus_#_aureus_!_subsp._{_aureus_}_65-1322_genomic_scaffold_supercont1.10_whole_genome_shotgun_sequence|gi|257428858|ref|NZ_GG700568.1|	0.365	99.635	400	109248	109648
Staphylococcus_#_aureus_!_subsp._{_aureus_}_68-397_genomic_scaffold_supercont1.15_whole_genome_shotgun_sequence|gi|257431468|ref|NZ_GG700588.1|	0.366	99.634	400	108834	109234
Staphylococcus_#_aureus_!_subsp._{_aureus_}_A017934/97_genomic_scaffold_supercont1.14_whole_genome_shotgun_sequence|gi|283958620|ref|NZ_GG731508.1|	0.214	99.786	400	186540	186940
Staphylococcus_#_aureus_!_subsp._{_aureus_}_A017934/97_genomic_scaffold_supercont1.15_whole_genome_shotgun_sequence|gi|283958840|ref|NZ_GG731509.1|	0.359	99.641	400	111058	111458
Staphylococcus_#_aureus_!_subsp._{_aureus_}_Btn1260_genomic_scaffold_supercont1.11_whole_genome_shotgun_sequence|gi|282906406|ref|NZ_GG730266.1|	0.36	99.64	400	110811	111211
Staphylococcus_#_aureus_!_subsp._{_aureus_}_C101_genomic_scaffold_supercont1.17_whole_genome_shotgun_sequence|gi|282925449|ref|NZ_GG730136.1|	0.364	99.636	400	109436	109836
Staphylococcus_#_aureus_!_subsp._{_aureus_}_C160_genomic_scaffold_supercont1.20_whole_genome_shotgun_sequence|gi|282904618|ref|NZ_GG730292.1|	0.447	99.553	400	89161	89561
Staphylococcus_#_aureus_!_subsp._{_aureus_}_C160_genomic_scaffold_supercont1.21_whole_genome_shotgun_sequence|gi|282904727|ref|NZ_GG730293.1|	0.358	99.642	400	111411	111811
Staphylococcus_#_aureus_!_subsp._{_aureus_}_C427_genomic_scaffold_supercont1.11_whole_genome_shotgun_sequence|gi|282919625|ref|NZ_GG730151.1|	0.208	99.792	400	191729	192129
Staphylococcus_#_aureus_!_subsp._{_aureus_}_C427_genomic_scaffold_supercont1.15_whole_genome_shotgun_sequence|gi|282920237|ref|NZ_GG730155.1|	0.366	99.634	400	109002	109402
Staphylococcus_#_aureus_!_subsp._{_aureus_}_E1410_genomic_scaffold_supercont1.15_whole_genome_shotgun_sequence|gi|257434178|ref|NZ_GG700611.1|	0.367	99.633	400	108597	108997
Staphylococcus_#_aureus_!_subsp._{_aureus_}_EMRSA16_genomic_scaffold_supercont1.16_whole_genome_shotgun_sequence|gi|295428648|ref|NZ_GG770528.1|	0.355	99.645	400	112376	112776
Staphylococcus_#_aureus_!_subsp._{_aureus_}_EMRSA16_genomic_scaffold_supercont1.18_whole_genome_shotgun_sequence|gi|295428754|ref|NZ_GG770530.1|	0.193	99.807	400	207377	207777
Staphylococcus_#_aureus_!_subsp._{_aureus_}_M1015_genomic_scaffold_supercont1.16_whole_genome_shotgun_sequence|gi|293547492|ref|NZ_GG749011.1|	0.365	99.635	400	109250	109650
Staphylococcus_#_aureus_!_subsp._{_aureus_}_M809_genomic_scaffold_supercont1.13_whole_genome_shotgun_sequence|gi|293510275|ref|NZ_GG749311.1|	0.17	99.83	400	234496	234896
Staphylococcus_#_aureus_!_subsp._{_aureus_}_M876_genomic_scaffold_supercont1.13_whole_genome_shotgun_sequence|gi|257437091|ref|NZ_GG700626.1|	0.365	99.635	400	109128	109528
Staphylococcus_#_aureus_!_subsp._{_aureus_}_M899_genomic_scaffold_supercont1.14_whole_genome_shotgun_sequence|gi|282914906|ref|NZ_GG730203.1|	0.367	99.633	400	108566	108966
Staphylococcus_#_aureus_!_subsp._{_aureus_}_MRSA131_genomic_scaffold_Scfld121_whole_genome_shotgun_sequence|gi|422745993|ref|NZ_GL638180.1|	2.054	97.946	400	19075	19475
Staphylococcus_#_aureus_!_subsp._{_aureus_}_MRSA177_genomic_scaffold_Scfld406_whole_genome_shotgun_sequence|gi|422744525|ref|NZ_GL638239.1|	0.531	99.469	400	74869	75269
Staphylococcus_#_aureus_!_subsp._{_aureus_}_MRSA177_genomic_scaffold_Scfld53_whole_genome_shotgun_sequence|gi|422742863|ref|NZ_GL638209.1|	0.456	99.544	400	87360	87760
Staphylococcus_#_aureus_!_subsp._{_aureus_}_MRSA177_genomic_scaffold_Scfld61_whole_genome_shotgun_sequence|gi|422743031|ref|NZ_GL638213.1|	0.737	99.263	400	53868	54268
Staphylococcus_#_aureus_!_subsp._{_aureus_}_TCH130_genomic_scaffold_SCAFFOLD6_whole_genome_shotgun_sequence|gi|255925768|ref|NZ_GG698163.1|	0.362	99.638	400	110167	110567
Staphylococcus_#_aureus_!_subsp._{_aureus_}_TCH130_genomic_scaffold_SCAFFOLD9_whole_genome_shotgun_sequence|gi|255925771|ref|NZ_GG698166.1|	0.386	99.614	400	103193	103593
Staphylococcus_#_aureus_!_subsp._{_aureus_}_WBG10049_genomic_scaffold_supercont1.8_whole_genome_shotgun_sequence|gi|282911628|ref|NZ_GG730215.1|	0.366	99.634	400	108897	109297
Staphylococcus_#_aureus_!_subsp._{_aureus_}_WW2703/97_genomic_scaffold_supercont1.28_whole_genome_shotgun_sequence|gi|282909179|ref|NZ_GG730247.1|	0.233	99.767	400	171540	171940
Staphylococcus_#_caprae_!_C87_{_genomic_}_scaffold_supercont1.12_whole_genome_shotgun_sequence|gi|314934230|ref|NZ_GL545278.1|	0.045	99.955	400	884476	884876
Staphylococcus_#_lugdunensis_!_M23590_{_genomic_}_scaffold_SCAFFOLD6_whole_genome_shotgun_sequence|gi|319430689|ref|NZ_GL622356.1|	10.482	89.518	326	2784	3110
Staphylococcus_#_epidermidis_!_M23864:W1_{_genomic_}_scaffold_SCAFFOLD5_whole_genome_shotgun_sequence|gi|254213015|ref|NZ_GG696777.1|	6.071	93.929	313	4843	5156
Staphylococcus_#_aureus_!_B40950_{_genomic_}_scaffold_acqwJ-supercont1.2_whole_genome_shotgun_sequence|gi|486329675|ref|NZ_KB822337.1|	0.022	99.978	301	1348526	1348827
Staphylococcus_#_aureus_!_M0075_{_genomic_}_scaffold_acunI-supercont1.1_whole_genome_shotgun_sequence|gi|487399773|ref|NZ_KB822347.1|	0.028	99.972	301	1063520	1063821
Staphylococcus_#_aureus_!_M0210_{_genomic_}_scaffold_acqwt-supercont1.1_whole_genome_shotgun_sequence|gi|487373279|ref|NZ_KB821105.1|	0.013	99.987	301	2284587	2284888
Staphylococcus_#_aureus_!_M0280_{_genomic_}_scaffold_acunT-supercont1.8_whole_genome_shotgun_sequence|gi|487362733|ref|NZ_KB821188.1|	0.018	99.982	301	1711825	1712126
Staphylococcus_#_aureus_!_M0391_{_genomic_}_scaffold_acqwG-supercont1.7_whole_genome_shotgun_sequence|gi|486291809|ref|NZ_KB821315.1|	0.033	99.967	301	911138	911439
Staphylococcus_#_aureus_!_M0427_{_genomic_}_scaffold_acqxJ-supercont1.1_whole_genome_shotgun_sequence|gi|486299599|ref|NZ_KB821335.1|	0.011	99.989	301	2811066	2811367
Staphylococcus_#_aureus_!_M0460_{_genomic_}_scaffold_acqxK-supercont1.2_whole_genome_shotgun_sequence|gi|487379866|ref|NZ_KB821364.1|	0.028	99.972	301	1071105	1071406
Staphylococcus_#_aureus_!_M0565_{_genomic_}_scaffold_acvqE-supercont1.3_whole_genome_shotgun_sequence|gi|486354564|ref|NZ_KB821481.1|	0.037	99.963	301	809282	809583
Staphylococcus_#_aureus_!_M0580_{_genomic_}_scaffold_acvrg-supercont1.1_whole_genome_shotgun_sequence|gi|486356325|ref|NZ_KB821486.1|	0.022	99.978	301	1367134	1367435
Staphylococcus_#_aureus_!_M0822_{_genomic_}_scaffold_acunB-supercont1.3_whole_genome_shotgun_sequence|gi|487383638|ref|NZ_KB821682.1|	0.037	99.963	301	805505	805806
Staphylococcus_#_aureus_!_M1078_{_genomic_}_scaffold_aculT-supercont1.2_whole_genome_shotgun_sequence|gi|487400778|ref|NZ_KB822363.1|	0.034	99.966	301	877171	877472
Staphylococcus_#_aureus_!_M1229_{_genomic_}_scaffold_acunX-supercont1.1_whole_genome_shotgun_sequence|gi|486622114|ref|NZ_KB822108.1|	0.029	99.971	301	1034472	1034773
Staphylococcus_#_aureus_!_subsp._{_aureus_}_M809_genomic_scaffold_supercont1.23_whole_genome_shotgun_sequence|gi|293511188|ref|NZ_GG749321.1|	0.163	99.837	301	184283	184584
Bacillus_#_cereus_!_BAG2O-3_{_genomic_}_scaffold_acfXF-supercont1.1_whole_genome_shotgun_sequence|gi|507017505|ref|NZ_KB976530.1|	0.006	99.994	300	5327709	5328009
Bacillus_#_cereus_!_BAG6X1-1_{_genomic_}_scaffold_supercont1.2_whole_genome_shotgun_sequence|gi|423479658|ref|NZ_JH804638.1|	0.074	99.926	300	403440	403740
Bacillus_#_cereus_!_K-5975c_{_genomic_}_scaffold_achrv-supercont1.1_whole_genome_shotgun_sequence|gi|507028190|ref|NZ_KB976300.1|	0.006	99.994	300	5209268	5209568
Bacillus_#_cereus_!_VD078_{_genomic_}_scaffold_supercont1.1_whole_genome_shotgun_sequence|gi|423597198|ref|NZ_JH792251.1|	0.006	99.994	300	5171741	5172041
Bacillus_#_cereus_!_VD115_{_genomic_}_scaffold_supercont1.2_whole_genome_shotgun_sequence|gi|423618739|ref|NZ_JH792166.1|	0.045	99.955	300	660449	660749
Bacillus_#_cereus_!_VD148_{_genomic_}_scaffold_supercont1.2_whole_genome_shotgun_sequence|gi|423626141|ref|NZ_JH792157.1|	0.066	99.934	300	451547	451847
Staphylococcus_#_aureus_!_B40723_{_genomic_}_scaffold_acqwm-supercont1.10_whole_genome_shotgun_sequence|gi|486325523|ref|NZ_KB822326.1|	0.033	99.967	300	910105	910405
Staphylococcus_#_aureus_!_M0108_{_genomic_}_scaffold_acunZ-supercont1.1_whole_genome_shotgun_sequence|gi|487350973|ref|NZ_KB821033.1|	0.061	99.939	300	489415	489715
Staphylococcus_#_aureus_!_M0221_{_genomic_}_scaffold_acqxa-supercont1.1_whole_genome_shotgun_sequence|gi|486258704|ref|NZ_KB821123.1|	1.784	98.216	300	16513	16813
Staphylococcus_#_aureus_!_M0273_{_genomic_}_scaffold_acqxR-supercont1.1_whole_genome_shotgun_sequence|gi|487375323|ref|NZ_KB821167.1|	0.021	99.979	300	1421657	1421957
Staphylococcus_#_aureus_!_M0334_{_genomic_}_scaffold_acumz-supercont1.1_whole_genome_shotgun_sequence|gi|487363432|ref|NZ_KB821234.1|	0.022	99.978	300	1382957	1383257
Staphylococcus_#_aureus_!_M0340_{_genomic_}_scaffold_acqxN-supercont1.1_whole_genome_shotgun_sequence|gi|486279730|ref|NZ_KB821241.1|	1.778	98.222	300	16569	16869
Staphylococcus_#_aureus_!_M0408_{_genomic_}_scaffold_acrHk-supercont1.6_whole_genome_shotgun_sequence|gi|486297196|ref|NZ_KB821331.1|	0.376	99.624	300	79449	79749
Staphylococcus_#_aureus_!_M0424_{_genomic_}_scaffold_acunn-supercont1.2_whole_genome_shotgun_sequence|gi|487367927|ref|NZ_KB821338.1|	0.763	99.237	300	39010	39310
Staphylococcus_#_aureus_!_M0468_{_genomic_}_scaffold_acqxk-supercont1.1_whole_genome_shotgun_sequence|gi|486308227|ref|NZ_KB821358.1|	1.778	98.222	300	16569	16869
Staphylococcus_#_aureus_!_M0565_{_genomic_}_scaffold_acvqE-supercont1.6_whole_genome_shotgun_sequence|gi|486355103|ref|NZ_KB821484.1|	0.033	99.967	300	908764	909064
Staphylococcus_#_aureus_!_M0994_{_genomic_}_scaffold_acunc-supercont1.3_whole_genome_shotgun_sequence|gi|487390907|ref|NZ_KB821811.1|	0.018	99.982	300	1689788	1690088
Staphylococcus_#_aureus_!_M1093_{_genomic_}_scaffold_acumQ-supercont1.5_whole_genome_shotgun_sequence|gi|486424990|ref|NZ_KB821950.1|	0.023	99.977	300	1314334	1314634
Staphylococcus_#_aureus_!_M1109_{_genomic_}_scaffold_acunD-supercont1.3_whole_genome_shotgun_sequence|gi|487395342|ref|NZ_KB822014.1|	0.019	99.981	300	1585727	1586027
Staphylococcus_#_aureus_!_M1109_{_genomic_}_scaffold_acunD-supercont1.6_whole_genome_shotgun_sequence|gi|487395514|ref|NZ_KB822017.1|	0.117	99.883	300	256047	256347
Staphylococcus_#_aureus_!_M1275_{_genomic_}_scaffold_acumX-supercont1.4_whole_genome_shotgun_sequence|gi|487397585|ref|NZ_KB822133.1|	0.666	99.334	300	44752	45052
Staphylococcus_#_aureus_!_M1291_{_genomic_}_scaffold_acumW-supercont1.6_whole_genome_shotgun_sequence|gi|486811309|ref|NZ_KB822171.1|	0.024	99.976	300	1227907	1228207
Staphylococcus_#_aureus_!_M1462_{_genomic_}_scaffold_acumH-supercont1.2_whole_genome_shotgun_sequence|gi|487135374|ref|NZ_KB822551.1|	1.769	98.231	300	16662	16962
Staphylococcus_#_aureus_!_M1481_{_genomic_}_scaffold_aculQ-supercont1.4_whole_genome_shotgun_sequence|gi|487136766|ref|NZ_KB822251.1|	0.021	99.979	300	1414715	1415015
Staphylococcus_#_aureus_!_M1510_{_genomic_}_scaffold_aculM-supercont1.4_whole_genome_shotgun_sequence|gi|487399562|ref|NZ_KB822260.1|	0.162	99.838	300	184793	185093
Staphylococcus_#_aureus_!_M1510_{_genomic_}_scaffold_aculM-supercont1.5_whole_genome_shotgun_sequence|gi|487399617|ref|NZ_KB822261.1|	0.04	99.96	300	745436	745736
Staphylococcus_#_aureus_!_M1521_{_genomic_}_scaffold_acunr-supercont1.6_whole_genome_shotgun_sequence|gi|487137659|ref|NZ_KB822273.1|	0.018	99.982	300	1638750	1639050
Staphylococcus_#_aureus_!_M1556_{_genomic_}_scaffold_acund-supercont1.6_whole_genome_shotgun_sequence|gi|487139877|ref|NZ_KB822297.1|	0.047	99.953	300	643253	643553
Staphylococcus_#_aureus_!_plasmid_{_SAP019A_}_complete_sequence|gi|260666193|ref|NC_013322.1|	1.093	98.907	300	27135	27435
Staphylococcus_#_aureus_!_plasmid_{_SAP052A_}_complete_sequence|gi|260667554|ref|NC_013332.1|	0.925	99.075	300	32145	32445
Staphylococcus_#_aureus_!_plasmid_{_SAP068A_}_complete_sequence|gi|260667560|ref|NC_013338.1|	0.594	99.406	300	50200	50500
Staphylococcus_#_aureus_!_plasmid_{_SAP069A_}_complete_sequence|gi|260667561|ref|NC_013339.1|	0.711	99.289	300	41898	42198
Staphylococcus_#_aureus_!_plasmid_{_SAP076A_}_complete_sequence|gi|260667562|ref|NC_013340.1|	0.854	99.146	300	34814	35114
Staphylococcus_#_aureus_!_plasmid_{_SAP077A_}_complete_sequence|gi|410108961|ref|NC_018965.1|	0.845	99.155	300	35210	35510
Staphylococcus_#_aureus_!_plasmid_{_SAP078A_}_complete_sequence|gi|410108982|ref|NC_019009.1|	0.845	99.155	300	35208	35508
Staphylococcus_#_aureus_!_plasmid_{_SAP079A_}_complete_sequence|gi|260667564|ref|NC_013342.1|	0.634	99.366	300	47022	47322
Staphylococcus_#_aureus_!_plasmid_{_SAP080A_}_complete_sequence|gi|260667565|ref|NC_013343.1|	0.683	99.317	300	43592	43892
Staphylococcus_#_aureus_!_plasmid_{_SAP082A_}_complete_sequence|gi|260667566|ref|NC_013344.1|	0.68	99.32	300	43816	44116
Staphylococcus_#_aureus_!_plasmid_{_pSK1_}_complete_sequence|gi|302344722|ref|NC_014369.1|	1.066	98.934	300	27850	28150
Staphylococcus_#_aureus_!_plasmid_{_pWBG753_}_complete_sequence|gi|260667550|ref|NC_013328.1|	0.998	99.002	300	29747	30047
Staphylococcus_#_aureus_!_subsp._{_aureus_}_68-397_genomic_scaffold_supercont1.12_whole_genome_shotgun_sequence|gi|257431274|ref|NZ_GG700585.1|	0.336	99.664	300	89024	89324
Staphylococcus_#_aureus_!_subsp._{_aureus_}_C101_genomic_scaffold_supercont1.14_whole_genome_shotgun_sequence|gi|282925097|ref|NZ_GG730133.1|	0.336	99.664	300	89081	89381
Staphylococcus_#_aureus_!_subsp._{_aureus_}_CM05_genomic_scaffold_Scfld10_whole_genome_shotgun_sequence|gi|424767604|ref|NZ_JH806477.1|	0.293	99.707	300	102049	102349
Staphylococcus_#_aureus_!_subsp._{_aureus_}_D139_genomic_scaffold_supercont1.2_whole_genome_shotgun_sequence|gi|282915416|ref|NZ_GG730160.1|	19.28	80.72	300	1256	1556
Staphylococcus_#_aureus_!_subsp._{_aureus_}_M1015_genomic_scaffold_supercont1.12_whole_genome_shotgun_sequence|gi|293539290|ref|NZ_GG749007.1|	0.335	99.665	300	89160	89460
Staphylococcus_#_aureus_!_subsp._{_aureus_}_M1015_genomic_scaffold_supercont1.9_whole_genome_shotgun_sequence|gi|293530869|ref|NZ_GG749004.1|	0.168	99.832	300	178449	178749
Staphylococcus_#_aureus_!_subsp._{_aureus_}_M809_genomic_scaffold_supercont1.22_whole_genome_shotgun_sequence|gi|293510998|ref|NZ_GG749320.1|	0.175	99.825	300	170954	171254
Staphylococcus_#_aureus_!_subsp._{_aureus_}_M876_genomic_scaffold_supercont1.11_whole_genome_shotgun_sequence|gi|257436896|ref|NZ_GG700624.1|	0.336	99.664	300	89104	89404
Staphylococcus_#_aureus_!_subsp._{_aureus_}_M899_genomic_scaffold_supercont1.9_whole_genome_shotgun_sequence|gi|282914656|ref|NZ_GG730198.1|	0.335	99.665	300	89251	89551
Staphylococcus_#_aureus_!_subsp._{_aureus_}_MRSA131_genomic_scaffold_Scfld13_whole_genome_shotgun_sequence|gi|422744965|ref|NZ_GL638164.1|	0.841	99.159	300	35377	35677
Staphylococcus_#_aureus_!_subsp._{_aureus_}_MRSA131_genomic_scaffold_Scfld44_whole_genome_shotgun_sequence|gi|422745064|ref|NZ_GL638168.1|	0.535	99.465	300	55760	56060
Staphylococcus_#_aureus_!_subsp._{_aureus_}_MRSA177_genomic_scaffold_Scfld16_whole_genome_shotgun_sequence|gi|422742271|ref|NZ_GL638201.1|	0.662	99.338	300	45046	45346
Staphylococcus_#_aureus_!_subsp._{_aureus_}_MRSA177_genomic_scaffold_Scfld182_whole_genome_shotgun_sequence|gi|422743723|ref|NZ_GL638225.1|	3.99	96.01	300	7218	7518
Staphylococcus_#_aureus_!_subsp._{_aureus_}_MRSA177_genomic_scaffold_Scfld63_whole_genome_shotgun_sequence|gi|422743087|ref|NZ_GL638214.1|	0.841	99.159	300	35377	35677
Staphylococcus_#_aureus_!_subsp._{_aureus_}_USA300_FPR3757_plasmid_pUSA03_complete_sequence|gi|87159847|ref|NC_007792.1|	0.808	99.192	300	36836	37136
Staphylococcus_#_aureus_!_subsp._{_aureus_}_WBG10049_genomic_scaffold_supercont1.7_whole_genome_shotgun_sequence|gi|282911485|ref|NZ_GG730214.1|	0.207	99.793	300	144868	145168
Staphylococcus_#_aureus_!_subsp._{_aureus_}_WW2703/97_genomic_scaffold_supercont1.11_whole_genome_shotgun_sequence|gi|282907983|ref|NZ_GG730230.1|	2.198	97.802	300	13348	13648
Staphylococcus_#_epidermidis_!_M23864:W1_{_genomic_}_scaffold_SCAFFOLD1_whole_genome_shotgun_sequence|gi|254213011|ref|NZ_GG696773.1|	0.022	99.978	300	1392292	1392592
Staphylococcus_#_epidermidis_!_Scl25_{_genomic_}_scaffold_Scl25_scaffold130_whole_genome_shotgun_sequence|gi|520978689|ref|NZ_KE367458.1|	4.808	95.192	300	5940	6240
Staphylococcus_#_epidermidis_!_Scl31_{_genomic_}_scaffold_Scl31_scaffold414_whole_genome_shotgun_sequence|gi|520980007|ref|NZ_KE368152.1|	3.912	96.088	300	7368	7668
Staphylococcus_#_epidermidis_!_plasmid_{_SAP016A_}_complete_sequence|gi|260871249|ref|NC_013372.1|	0.685	99.315	300	43507	43807
Staphylococcus_#_epidermidis_!_plasmid_{_SAP105A_}_complete_sequence|gi|260874698|ref|NC_013377.1|	1.143	98.857	300	25936	26236
Staphylococcus_#_hominis_!_subsp._{_hominis_}_C80_genomic_scaffold_supercont1.3_whole_genome_shotgun_sequence|gi|314935124|ref|NZ_GL545254.1|	0.094	99.906	300	317939	318239
Staphylococcus_#_lugdunensis_!_M23590_{_genomic_}_scaffold_SCAFFOLD1_whole_genome_shotgun_sequence|gi|319430684|ref|NZ_GL622351.1|	0.024	99.976	300	1264928	1265228
Staphylococcus_#_massiliensis_!_CCUG_{_55927_}_scaffold00001_whole_genome_shotgun_sequence|gi|484268961|ref|NZ_JH815593.1|	0.017	99.983	300	1761131	1761431
Staphylococcus_#_saprophyticus_!_subsp._{_saprophyticus_}_ATCC_15305_plasmid_pSSP1_complete_sequence|gi|73663756|ref|NC_007351.1|	0.78	99.22	300	38154	38454
Staphylococcus_#_saprophyticus_!_subsp._{_saprophyticus_}_ATCC_15305_plasmid_pSSP2_complete_sequence|gi|73663802|ref|NC_007352.1|	1.312	98.688	300	22570	22870
Staphylococcus_#_sp._!_CDC25_{_plasmid_}_SAP018A_complete_sequence|gi|260894451|ref|NC_013387.1|	0.923	99.077	300	32187	32487
Staphylococcus_#_aureus_!_subsp._{_aureus_}_D139_genomic_scaffold_supercont1.3_whole_genome_shotgun_sequence|gi|282915419|ref|NZ_GG730161.1|	0.135	99.865	299	221531	221830
Staphylococcus_#_aureus_!_subsp._{_aureus_}_M809_genomic_scaffold_supercont1.5_whole_genome_shotgun_sequence|gi|293509335|ref|NZ_GG749303.1|	15.89	84.11	266	1408	1674
Staphylococcus_#_lugdunensis_!_ACS-027-V-Sch2_{_genomic_}_scaffold_supercont1.4_whole_genome_shotgun_sequence|gi|448879136|ref|NZ_KB373325.1|	0.55	99.45	266	48100	48366
Staphylococcus_#_aureus_!_B53639_{_genomic_}_scaffold_acqwD-supercont1.4_whole_genome_shotgun_sequence|gi|486323211|ref|NZ_KB822344.1|	0.014	99.986	201	1424307	1424508
Staphylococcus_#_aureus_!_M0177_{_genomic_}_scaffold_acumi-supercont1.2_whole_genome_shotgun_sequence|gi|487360048|ref|NZ_KB821079.1|	0.019	99.981	201	1038534	1038735
Staphylococcus_#_aureus_!_M0216_{_genomic_}_scaffold_acumr-supercont1.1_whole_genome_shotgun_sequence|gi|487361292|ref|NZ_KB821119.1|	0.014	99.986	201	1437382	1437583
Staphylococcus_#_aureus_!_M0240_{_genomic_}_scaffold_acqwO-supercont1.7_whole_genome_shotgun_sequence|gi|487374535|ref|NZ_KB821151.1|	0.034	99.966	201	590499	590700
Staphylococcus_#_aureus_!_M0273_{_genomic_}_scaffold_acqxR-supercont1.4_whole_genome_shotgun_sequence|gi|487375558|ref|NZ_KB821170.1|	0.024	99.976	201	845450	845651
Staphylococcus_#_aureus_!_M0328_{_genomic_}_scaffold_acrGR-supercont1.4_whole_genome_shotgun_sequence|gi|486272995|ref|NZ_KB821214.1|	0.012	99.988	201	1652795	1652996
Staphylococcus_#_aureus_!_M0467_{_genomic_}_scaffold_acqwA-supercont1.2_whole_genome_shotgun_sequence|gi|486305522|ref|NZ_KB821371.1|	0.019	99.981	201	1060789	1060990
Staphylococcus_#_aureus_!_M0493_{_genomic_}_scaffold_acqwN-supercont1.3_whole_genome_shotgun_sequence|gi|487380377|ref|NZ_KB821403.1|	0.014	99.986	201	1443220	1443421
Staphylococcus_#_aureus_!_M0562_{_genomic_}_scaffold_acumS-supercont1.2_whole_genome_shotgun_sequence|gi|487370195|ref|NZ_KB821471.1|	0.019	99.981	201	1037539	1037740
Staphylococcus_#_aureus_!_M0692_{_genomic_}_scaffold_acvqM-supercont1.4_whole_genome_shotgun_sequence|gi|486369161|ref|NZ_KB821590.1|	0.057	99.943	201	349457	349658
Staphylococcus_#_aureus_!_M0769_{_genomic_}_scaffold_acvqF-supercont1.3_whole_genome_shotgun_sequence|gi|480447467|ref|NZ_KB821631.1|	0.025	99.975	201	805204	805405
Staphylococcus_#_aureus_!_M0780_{_genomic_}_scaffold_acvqm-supercont1.3_whole_genome_shotgun_sequence|gi|486376198|ref|NZ_KB821664.1|	0.025	99.975	201	803582	803783
Staphylococcus_#_aureus_!_M0999_{_genomic_}_scaffold_acvqG-supercont1.2_whole_genome_shotgun_sequence|gi|486399550|ref|NZ_KB821821.1|	0.014	99.986	201	1476879	1477080
Staphylococcus_#_aureus_!_M1010_{_genomic_}_scaffold_acvqt-supercont1.1_whole_genome_shotgun_sequence|gi|486402553|ref|NZ_KB821824.1|	0.014	99.986	201	1444211	1444412
Staphylococcus_#_aureus_!_M1016_{_genomic_}_scaffold_acvqx-supercont1.3_whole_genome_shotgun_sequence|gi|486406130|ref|NZ_KB821844.1|	0.025	99.975	201	808474	808675
Staphylococcus_#_aureus_!_M1142_{_genomic_}_scaffold_acumk-supercont1.1_whole_genome_shotgun_sequence|gi|487396127|ref|NZ_KB821988.1|	0.013	99.987	201	1575141	1575342
Staphylococcus_#_aureus_!_M1167_{_genomic_}_scaffold_acuns-supercont1.3_whole_genome_shotgun_sequence|gi|486432083|ref|NZ_KB822044.1|	0.025	99.975	201	809206	809407
Staphylococcus_#_aureus_!_M1198_{_genomic_}_scaffold_acumf-supercont1.1_whole_genome_shotgun_sequence|gi|486435575|ref|NZ_KB822051.1|	0.019	99.981	201	1061214	1061415
Staphylococcus_#_aureus_!_M1224_{_genomic_}_scaffold_acumM-supercont1.6_whole_genome_shotgun_sequence|gi|487396747|ref|NZ_KB822082.1|	0.02	99.98	201	982271	982472
Staphylococcus_#_aureus_!_M1257_{_genomic_}_scaffold_acumo-supercont1.3_whole_genome_shotgun_sequence|gi|486715789|ref|NZ_KB822127.1|	0.016	99.984	201	1241438	1241639
Staphylococcus_#_aureus_!_M1277_{_genomic_}_scaffold_acung-supercont1.2_whole_genome_shotgun_sequence|gi|486747506|ref|NZ_KB822137.1|	0.019	99.981	201	1053701	1053902
Staphylococcus_#_aureus_!_M1286_{_genomic_}_scaffold_acuob-supercont1.4_whole_genome_shotgun_sequence|gi|487398182|ref|NZ_KB822150.1|	0.034	99.966	201	585433	585634
Staphylococcus_#_aureus_!_M1291_{_genomic_}_scaffold_acumW-supercont1.5_whole_genome_shotgun_sequence|gi|486798074|ref|NZ_KB822170.1|	0.038	99.962	201	528298	528499
Staphylococcus_#_aureus_!_M1320_{_genomic_}_scaffold_acumx-supercont1.1_whole_genome_shotgun_sequence|gi|486868496|ref|NZ_KB822182.1|	0.014	99.986	201	1450940	1451141
Staphylococcus_#_aureus_!_M1405_{_genomic_}_scaffold_acumh-supercont1.7_whole_genome_shotgun_sequence|gi|487399157|ref|NZ_KB822547.1|	0.026	99.974	201	786630	786831
Staphylococcus_#_aureus_!_M1463_{_genomic_}_scaffold_acums-supercont1.3_whole_genome_shotgun_sequence|gi|487136072|ref|NZ_KB822558.1|	0.025	99.975	201	805441	805642
Staphylococcus_#_aureus_!_M1533_{_genomic_}_scaffold_aculS-supercont1.2_whole_genome_shotgun_sequence|gi|487138257|ref|NZ_KB822286.1|	0.014	99.986	201	1401965	1402166
Staphylococcus_#_aureus_!_M1544_{_genomic_}_scaffold_acunm-supercont1.6_whole_genome_shotgun_sequence|gi|487139172|ref|NZ_KB822281.1|	0.025	99.975	201	815188	815389
Staphylococcus_#_aureus_!_M1556_{_genomic_}_scaffold_acund-supercont1.2_whole_genome_shotgun_sequence|gi|487139644|ref|NZ_KB822293.1|	0.028	99.972	201	729880	730081
Staphylococcus_#_aureus_!_subsp._{_aureus_}_CM05_genomic_scaffold_Scfld155_whole_genome_shotgun_sequence|gi|424773131|ref|NZ_JH806534.1|	0.447	99.553	201	44740	44941
Staphylococcus_#_aureus_!_subsp._{_aureus_}_D139_genomic_scaffold_supercont1.4_whole_genome_shotgun_sequence|gi|282915602|ref|NZ_GG730162.1|	0.208	99.792	201	96253	96454
Staphylococcus_#_aureus_!_subsp._{_aureus_}_M809_genomic_scaffold_supercont1.1_whole_genome_shotgun_sequence|gi|293509181|ref|NZ_GG749299.1|	0.381	99.619	201	52582	52783
Staphylococcus_#_aureus_!_subsp._{_aureus_}_MRSA177_genomic_scaffold_Scfld332_whole_genome_shotgun_sequence|gi|422744201|ref|NZ_GL638234.1|	0.968	99.032	201	20564	20765
Bacillus_#_anthracis_!_str._{_CDC_}_684_chromosome_complete_genome|gi|227812678|ref|NC_012581.1|	0.004	99.996	200	5229915	5230115
Bacillus_#_atrophaeus_!_UCMB-5137_{_chromosome_}_whole_genome_shotgun_sequence|gi|498488879|ref|NZ_CM001847.1|	0.005	99.995	200	4115819	4116019
Bacillus_#_cereus_!_BAG1X1-1_{_genomic_}_scaffold_acfXz-supercont1.3_whole_genome_shotgun_sequence|gi|506995043|ref|NZ_KB976166.1|	0.042	99.958	200	481317	481517
Bacillus_#_cereus_!_BAG3O-1_{_genomic_}_scaffold_acqxM-supercont1.2_whole_genome_shotgun_sequence|gi|507064755|ref|NZ_KB976980.1|	0.004	99.996	200	4726224	4726424
Bacillus_#_cereus_!_HuA2-3_{_genomic_}_scaffold_acrHg-supercont1.2_whole_genome_shotgun_sequence|gi|507018610|ref|NZ_KB976664.1|	0.113	99.887	200	176423	176623
Bacillus_#_cereus_!_HuA2-3_{_genomic_}_scaffold_acrHg-supercont1.4_whole_genome_shotgun_sequence|gi|507018639|ref|NZ_KB976666.1|	0.093	99.907	200	215575	215775
Bacillus_#_cereus_!_K-5975c_{_genomic_}_scaffold_achrv-supercont1.4_whole_genome_shotgun_sequence|gi|507028230|ref|NZ_KB976305.1|	0.11	99.89	200	181316	181516
Bacillus_#_cereus_!_MSX-A1_{_genomic_}_scaffold_supercont1.2_whole_genome_shotgun_sequence|gi|423565564|ref|NZ_JH792105.1|	0.03	99.97	200	675491	675691
Bacillus_#_cereus_!_VD107_{_genomic_}_scaffold_supercont1.3_whole_genome_shotgun_sequence|gi|423613705|ref|NZ_JH792234.1|	0.047	99.953	200	427364	427564
Bacillus_#_cereus_!_VD131_{_genomic_}_scaffold_acrHi-supercont1.5_whole_genome_shotgun_sequence|gi|507035795|ref|NZ_KB976656.1|	0.083	99.917	200	240779	240979
Bacillus_#_cereus_!_VD142_{_genomic_}_scaffold_actaa-supercont2.9_whole_genome_shotgun_sequence|gi|514343587|ref|NZ_KE150052.1|	0.197	99.803	200	101370	101570
Bacillus_#_cereus_!_VD148_{_genomic_}_scaffold_supercont1.4_whole_genome_shotgun_sequence|gi|423626789|ref|NZ_JH792159.1|	0.093	99.907	200	215708	215908
Bacillus_#_cereus_!_VD200_{_genomic_}_scaffold_supercont1.1_whole_genome_shotgun_sequence|gi|423653012|ref|NZ_JH791819.1|	0.004	99.996	200	5473620	5473820
Bacillus_#_cereus_!_VDM022_{_genomic_}_scaffold_supercont1.1_whole_genome_shotgun_sequence|gi|423659603|ref|NZ_JH791837.1|	0.004	99.996	200	4585853	4586053
Bacillus_#_cereus_!_VDM062_{_genomic_}_scaffold_supercont1.1_whole_genome_shotgun_sequence|gi|423672457|ref|NZ_JH791802.1|	0.004	99.996	200	4895111	4895311
Bacillus_#_cereus_!_str._{_Schrouff_}_genomic_scaffold_acsZZ-supercont2.2_whole_genome_shotgun_sequence|gi|506986825|ref|NZ_KB976117.1|	0.03	99.97	200	672827	673027
Bacillus_#_cereus_!_str._{_Schrouff_}_genomic_scaffold_acsZZ-supercont2.5_whole_genome_shotgun_sequence|gi|506987208|ref|NZ_KB976120.1|	0.095	99.905	200	210201	210401
Enterococcus_#_faecalis_!_B1505_{_genomic_}_scaffold_acHXM-supercont1.4_whole_genome_shotgun_sequence|gi|500982315|ref|NZ_KB932432.1|	0.351	99.649	200	56769	56969
Paenibacillus_#_sp._!_HGH0039_{_genomic_}_scaffold_aczJo-supercont1.1_whole_genome_shotgun_sequence|gi|512471420|ref|NZ_KE150412.1|	0.006	99.994	200	3272676	3272876
Pediococcus_#_pentosaceus_!_ATCC_{_25745_}_complete_genome|gi|116491818|ref|NC_008525.1|	0.011	99.989	200	1832187	1832387
Staphylococcus_#_aureus_!_B147830_{_genomic_}_scaffold_acqwB-supercont1.7_whole_genome_shotgun_sequence|gi|486333606|ref|NZ_KB822317.1|	0.027	99.973	200	738402	738602
Staphylococcus_#_aureus_!_B40950_{_genomic_}_scaffold_acqwJ-supercont1.4_whole_genome_shotgun_sequence|gi|486330251|ref|NZ_KB822339.1|	0.022	99.978	200	910333	910533
Staphylococcus_#_aureus_!_M0077_{_genomic_}_scaffold_acunP-supercont1.5_whole_genome_shotgun_sequence|gi|487350224|ref|NZ_KB821003.1|	0.077	99.923	200	258780	258980
Staphylococcus_#_aureus_!_M0103_{_genomic_}_scaffold_acqxd-supercont1.1_whole_genome_shotgun_sequence|gi|486242902|ref|NZ_KB821012.1|	0.018	99.982	200	1117963	1118163
Staphylococcus_#_aureus_!_M0144_{_genomic_}_scaffold_acunq-supercont1.2_whole_genome_shotgun_sequence|gi|487359132|ref|NZ_KB821039.1|	0.032	99.968	200	621237	621437
Staphylococcus_#_aureus_!_M0192_{_genomic_}_scaffold_acqyc-supercont1.2_whole_genome_shotgun_sequence|gi|486254495|ref|NZ_KB821075.1|	0.041	99.959	200	491636	491836
Staphylococcus_#_aureus_!_M0212_{_genomic_}_scaffold_acuna-supercont1.4_whole_genome_shotgun_sequence|gi|487361012|ref|NZ_KB821113.1|	0.018	99.982	200	1111899	1112099
Staphylococcus_#_aureus_!_M0216_{_genomic_}_scaffold_acumr-supercont1.3_whole_genome_shotgun_sequence|gi|487361486|ref|NZ_KB821121.1|	0.014	99.986	200	1419476	1419676
Staphylococcus_#_aureus_!_M0237_{_genomic_}_scaffold_acrHd-supercont1.6_whole_genome_shotgun_sequence|gi|486262447|ref|NZ_KB821138.1|	0.032	99.968	200	624336	624536
Staphylococcus_#_aureus_!_M0240_{_genomic_}_scaffold_acqwO-supercont1.5_whole_genome_shotgun_sequence|gi|487374265|ref|NZ_KB821149.1|	0.047	99.953	200	426398	426598
Staphylococcus_#_aureus_!_M0270_{_genomic_}_scaffold_acrGX-supercont1.1_whole_genome_shotgun_sequence|gi|487374734|ref|NZ_KB821154.1|	0.018	99.982	200	1114090	1114290
Staphylococcus_#_aureus_!_M0326_{_genomic_}_scaffold_acrHf-supercont1.8_whole_genome_shotgun_sequence|gi|486270247|ref|NZ_KB821209.1|	0.018	99.982	200	1117658	1117858
Staphylococcus_#_aureus_!_M0415_{_genomic_}_scaffold_acrGP-supercont1.1_whole_genome_shotgun_sequence|gi|487379100|ref|NZ_KB821317.1|	0.016	99.984	200	1227914	1228114
Staphylococcus_#_aureus_!_M0415_{_genomic_}_scaffold_acrGP-supercont1.2_whole_genome_shotgun_sequence|gi|487379162|ref|NZ_KB821318.1|	0.033	99.967	200	601954	602154
Staphylococcus_#_aureus_!_M0415_{_genomic_}_scaffold_acrGP-supercont1.5_whole_genome_shotgun_sequence|gi|487379269|ref|NZ_KB821321.1|	0.13	99.87	200	153613	153813
Staphylococcus_#_aureus_!_M0438_{_genomic_}_scaffold_acuml-supercont1.4_whole_genome_shotgun_sequence|gi|487368753|ref|NZ_KB821353.1|	0.018	99.982	200	1104667	1104867
Staphylococcus_#_aureus_!_M0450_{_genomic_}_scaffold_acqwq-supercont1.6_whole_genome_shotgun_sequence|gi|486304007|ref|NZ_KB821348.1|	0.032	99.968	200	621200	621400
Staphylococcus_#_aureus_!_M0460_{_genomic_}_scaffold_acqxK-supercont1.4_whole_genome_shotgun_sequence|gi|487379995|ref|NZ_KB821366.1|	0.014	99.986	200	1423013	1423213
Staphylococcus_#_aureus_!_M0467_{_genomic_}_scaffold_acqwA-supercont1.5_whole_genome_shotgun_sequence|gi|486307196|ref|NZ_KB821374.1|	0.014	99.986	200	1466380	1466580
Staphylococcus_#_aureus_!_M0536_{_genomic_}_scaffold_acvqu-supercont1.1_whole_genome_shotgun_sequence|gi|486343984|ref|NZ_KB821466.1|	0.04	99.96	200	501128	501328
Staphylococcus_#_aureus_!_M0539_{_genomic_}_scaffold_acvqn-supercont1.1_whole_genome_shotgun_sequence|gi|486346615|ref|NZ_KB821450.1|	0.018	99.982	200	1088744	1088944
Staphylococcus_#_aureus_!_M0539_{_genomic_}_scaffold_acvqn-supercont1.8_whole_genome_shotgun_sequence|gi|486349495|ref|NZ_KB821464.1|	0.085	99.915	200	234548	234748
Staphylococcus_#_aureus_!_M0547_{_genomic_}_scaffold_acvqJ-supercont1.1_whole_genome_shotgun_sequence|gi|486350836|ref|NZ_KB821442.1|	0.015	99.985	200	1303209	1303409
Staphylococcus_#_aureus_!_M0547_{_genomic_}_scaffold_acvqJ-supercont1.4_whole_genome_shotgun_sequence|gi|486351837|ref|NZ_KB821445.1|	0.03	99.97	200	656072	656272
Staphylococcus_#_aureus_!_M0562_{_genomic_}_scaffold_acumS-supercont1.5_whole_genome_shotgun_sequence|gi|487370355|ref|NZ_KB821474.1|	0.031	99.969	200	637036	637236
Staphylococcus_#_aureus_!_M0584_{_genomic_}_scaffold_acunu-supercont1.1_whole_genome_shotgun_sequence|gi|487370833|ref|NZ_KB821489.1|	0.04	99.96	200	501096	501296
Staphylococcus_#_aureus_!_M0622_{_genomic_}_scaffold_acvqA-supercont1.2_whole_genome_shotgun_sequence|gi|486361222|ref|NZ_KB821503.1|	0.056	99.944	200	358713	358913
Staphylococcus_#_aureus_!_M0676_{_genomic_}_scaffold_acvqP-supercont1.1_whole_genome_shotgun_sequence|gi|486363057|ref|NZ_KB821571.1|	0.044	99.956	200	449475	449675
Staphylococcus_#_aureus_!_M0676_{_genomic_}_scaffold_acvqP-supercont1.5_whole_genome_shotgun_sequence|gi|486364576|ref|NZ_KB821575.1|	0.022	99.978	200	912050	912250
Staphylococcus_#_aureus_!_M0687_{_genomic_}_scaffold_acvqC-supercont1.8_whole_genome_shotgun_sequence|gi|486367392|ref|NZ_KB821584.1|	0.021	99.979	200	939191	939391
Staphylococcus_#_aureus_!_M0692_{_genomic_}_scaffold_acvqM-supercont1.1_whole_genome_shotgun_sequence|gi|486368254|ref|NZ_KB821586.1|	0.023	99.977	200	854858	855058
Staphylococcus_#_aureus_!_M0770_{_genomic_}_scaffold_acvra-supercont1.1_whole_genome_shotgun_sequence|gi|480449782|ref|NZ_KB821638.1|	0.014	99.986	200	1416136	1416336
Staphylococcus_#_aureus_!_M0770_{_genomic_}_scaffold_acvra-supercont1.8_whole_genome_shotgun_sequence|gi|480453779|ref|NZ_KB821648.1|	0.127	99.873	200	156913	157113
Staphylococcus_#_aureus_!_M0823_{_genomic_}_scaffold_acvqk-supercont1.5_whole_genome_shotgun_sequence|gi|486382905|ref|NZ_KB821695.1|	0.076	99.924	200	261970	262170
Staphylococcus_#_aureus_!_M0871_{_genomic_}_scaffold_acumy-supercont1.6_whole_genome_shotgun_sequence|gi|487384723|ref|NZ_KB821706.1|	0.026	99.974	200	784078	784278
Staphylococcus_#_aureus_!_M0877_{_genomic_}_scaffold_acumt-supercont1.3_whole_genome_shotgun_sequence|gi|487385094|ref|NZ_KB821716.1|	0.184	99.816	200	108370	108570
Staphylococcus_#_aureus_!_M0900_{_genomic_}_scaffold_acunz-supercont1.8_whole_genome_shotgun_sequence|gi|487386575|ref|NZ_KB821746.1|	0.022	99.978	200	908609	908809
Staphylococcus_#_aureus_!_M0934_{_genomic_}_scaffold_acvqs-supercont1.1_whole_genome_shotgun_sequence|gi|486387797|ref|NZ_KB821760.1|	0.009	99.991	200	2202837	2203037
Staphylococcus_#_aureus_!_M0953_{_genomic_}_scaffold_acvql-supercont1.5_whole_genome_shotgun_sequence|gi|486397088|ref|NZ_KB821799.1|	0.019	99.981	200	1075383	1075583
Staphylococcus_#_aureus_!_M1062_{_genomic_}_scaffold_aculY-supercont1.7_whole_genome_shotgun_sequence|gi|487394275|ref|NZ_KB821918.1|	0.022	99.978	200	927990	928190
Staphylococcus_#_aureus_!_M1068_{_genomic_}_scaffold_acunM-supercont1.2_whole_genome_shotgun_sequence|gi|487394397|ref|NZ_KB821928.1|	0.058	99.942	200	345796	345996
Staphylococcus_#_aureus_!_M1068_{_genomic_}_scaffold_acunM-supercont1.6_whole_genome_shotgun_sequence|gi|487394575|ref|NZ_KB821932.1|	0.022	99.978	200	922983	923183
Staphylococcus_#_aureus_!_M1076_{_genomic_}_scaffold_acumq-supercont1.2_whole_genome_shotgun_sequence|gi|486417684|ref|NZ_KB821952.1|	0.148	99.852	200	135134	135334
Staphylococcus_#_aureus_!_M1076_{_genomic_}_scaffold_acumq-supercont1.4_whole_genome_shotgun_sequence|gi|486418406|ref|NZ_KB821954.1|	0.018	99.982	200	1090114	1090314
Staphylococcus_#_aureus_!_M1078_{_genomic_}_scaffold_aculT-supercont1.1_whole_genome_shotgun_sequence|gi|487400724|ref|NZ_KB822362.1|	0.036	99.964	200	555776	555976
Staphylococcus_#_aureus_!_M1078_{_genomic_}_scaffold_aculT-supercont1.5_whole_genome_shotgun_sequence|gi|487400877|ref|NZ_KB822366.1|	0.016	99.984	200	1244016	1244216
Staphylococcus_#_aureus_!_M1092_{_genomic_}_scaffold_acunK-supercont1.3_whole_genome_shotgun_sequence|gi|486422239|ref|NZ_KB821959.1|	0.058	99.942	200	342687	342887
Staphylococcus_#_aureus_!_M1092_{_genomic_}_scaffold_acunK-supercont1.5_whole_genome_shotgun_sequence|gi|486422832|ref|NZ_KB821961.1|	0.166	99.834	200	120548	120748
Staphylococcus_#_aureus_!_M1095_{_genomic_}_scaffold_aculR-supercont1.8_whole_genome_shotgun_sequence|gi|486427208|ref|NZ_KB821986.1|	0.03	99.97	200	668098	668298
Staphylococcus_#_aureus_!_M1126_{_genomic_}_scaffold_acumd-supercont1.3_whole_genome_shotgun_sequence|gi|487395891|ref|NZ_KB822000.1|	0.058	99.942	200	343705	343905
Staphylococcus_#_aureus_!_M1126_{_genomic_}_scaffold_acumd-supercont1.8_whole_genome_shotgun_sequence|gi|487395988|ref|NZ_KB822005.1|	0.025	99.975	200	784731	784931
Staphylococcus_#_aureus_!_M1142_{_genomic_}_scaffold_acumk-supercont1.2_whole_genome_shotgun_sequence|gi|487396191|ref|NZ_KB821989.1|	0.016	99.984	200	1243194	1243394
Staphylococcus_#_aureus_!_M1167_{_genomic_}_scaffold_acuns-supercont1.8_whole_genome_shotgun_sequence|gi|486432899|ref|NZ_KB822049.1|	0.026	99.974	200	778092	778292
Staphylococcus_#_aureus_!_M1198_{_genomic_}_scaffold_acumf-supercont1.3_whole_genome_shotgun_sequence|gi|486436221|ref|NZ_KB822053.1|	0.011	99.989	200	1756081	1756281
Staphylococcus_#_aureus_!_M1229_{_genomic_}_scaffold_acunX-supercont1.4_whole_genome_shotgun_sequence|gi|486635955|ref|NZ_KB822111.1|	0.013	99.987	200	1521650	1521850
Staphylococcus_#_aureus_!_M1255_{_genomic_}_scaffold_acunA-supercont1.1_whole_genome_shotgun_sequence|gi|486676271|ref|NZ_KB822116.1|	0.044	99.956	200	452720	452920
Staphylococcus_#_aureus_!_M1257_{_genomic_}_scaffold_acumo-supercont1.4_whole_genome_shotgun_sequence|gi|486728319|ref|NZ_KB822128.1|	0.018	99.982	200	1082668	1082868
Staphylococcus_#_aureus_!_M1320_{_genomic_}_scaffold_acumx-supercont1.4_whole_genome_shotgun_sequence|gi|486880809|ref|NZ_KB822185.1|	0.019	99.981	200	1076167	1076367
Staphylococcus_#_aureus_!_M1321_{_genomic_}_scaffold_acunh-supercont1.11_whole_genome_shotgun_sequence|gi|486895834|ref|NZ_KB822188.1|	0.032	99.968	200	630350	630550
Staphylococcus_#_aureus_!_M1451_{_genomic_}_scaffold_acunE-supercont1.5_whole_genome_shotgun_sequence|gi|480459573|ref|NZ_KB822245.1|	0.022	99.978	200	909557	909757
Staphylococcus_#_aureus_!_M1521_{_genomic_}_scaffold_acunr-supercont1.5_whole_genome_shotgun_sequence|gi|487137481|ref|NZ_KB822272.1|	1.098	98.902	200	18007	18207
Staphylococcus_#_aureus_!_M1531_{_genomic_}_scaffold_acunL-supercont1.1_whole_genome_shotgun_sequence|gi|487137805|ref|NZ_KB822263.1|	0.049	99.951	200	404176	404376
Staphylococcus_#_aureus_!_M1544_{_genomic_}_scaffold_acunm-supercont1.10_whole_genome_shotgun_sequence|gi|487138787|ref|NZ_KB822275.1|	0.032	99.968	200	622742	622942
Staphylococcus_#_aureus_!_M1556_{_genomic_}_scaffold_acund-supercont1.1_whole_genome_shotgun_sequence|gi|487139555|ref|NZ_KB822292.1|	0.024	99.976	200	849681	849881
Staphylococcus_#_aureus_!_M1565_{_genomic_}_scaffold_acunk-supercont1.1_whole_genome_shotgun_sequence|gi|487186501|ref|NZ_KB822299.1|	0.009	99.991	200	2209866	2210066
Staphylococcus_#_aureus_!_M1578_{_genomic_}_scaffold_aculL-supercont1.3_whole_genome_shotgun_sequence|gi|487223404|ref|NZ_KB822322.1|	0.022	99.978	200	917960	918160
Staphylococcus_#_aureus_!_plasmid_{_J3358_}_complete_sequence|gi|10956144|ref|NC_001763.1|	3.32	96.68	200	5824	6024
Staphylococcus_#_aureus_!_plasmid_{_SAP017A_}_complete_sequence|gi|260666163|ref|NC_013321.1|	0.613	99.387	200	32450	32650
Staphylococcus_#_aureus_!_plasmid_{_SAP047A_}_complete_sequence|gi|260667553|ref|NC_013331.1|	0.69	99.31	200	28774	28974
Staphylococcus_#_aureus_!_plasmid_{_SAP064A_}_complete_sequence|gi|260667559|ref|NC_013337.1|	0.648	99.352	200	30657	30857
Staphylococcus_#_aureus_!_plasmid_{_pCM05_}_complete_sequence|gi|260666220|ref|NC_013323.1|	0.594	99.406	200	33460	33660
Staphylococcus_#_aureus_!_plasmid_{_pI258_}_complete_sequence|gi|260666110|ref|NC_013319.1|	0.684	99.316	200	29054	29254
Staphylococcus_#_aureus_!_plasmid_{_pLW043_}_complete_sequence|gi|33416233|ref|NC_005054.1|	0.345	99.655	200	57689	57889
Staphylococcus_#_aureus_!_plasmid_{_pPR9_}_complete_sequence|gi|281427745|ref|NC_013653.1|	0.479	99.521	200	41515	41715
Staphylococcus_#_aureus_!_plasmid_{_pSK62_}_complete_sequence|gi|260667569|ref|NC_013347.1|	0.881	99.119	200	22494	22694
Staphylococcus_#_aureus_!_plasmid_{_pSK76_}_complete_sequence|gi|260667574|ref|NC_013352.1|	0.834	99.166	200	23783	23983
Staphylococcus_#_aureus_!_plasmid_{_pV030-8_}_complete_sequence|gi|166153441|ref|NC_010279.1|	0.512	99.488	200	38841	39041
Staphylococcus_#_aureus_!_subsp._{_aureus_}_55/2053_genomic_scaffold_supercont1.14_whole_genome_shotgun_sequence|gi|257426105|ref|NZ_GG700546.1|	0.261	99.739	200	76390	76590
Staphylococcus_#_aureus_!_subsp._{_aureus_}_55/2053_genomic_scaffold_supercont1.8_whole_genome_shotgun_sequence|gi|257425991|ref|NZ_GG700540.1|	0.229	99.771	200	87182	87382
Staphylococcus_#_aureus_!_subsp._{_aureus_}_68-397_genomic_scaffold_supercont1.14_whole_genome_shotgun_sequence|gi|257431371|ref|NZ_GG700587.1|	0.253	99.747	200	78846	79046
Staphylococcus_#_aureus_!_subsp._{_aureus_}_68-397_genomic_scaffold_supercont1.8_whole_genome_shotgun_sequence|gi|257430852|ref|NZ_GG700581.1|	0.143	99.857	200	139407	139607
Staphylococcus_#_aureus_!_subsp._{_aureus_}_A017934/97_genomic_scaffold_supercont1.17_whole_genome_shotgun_sequence|gi|283958944|ref|NZ_GG731511.1|	0.361	99.639	200	55179	55379
Staphylococcus_#_aureus_!_subsp._{_aureus_}_ATCC_51811_genomic_scaffold_SCAFFOLD7_whole_genome_shotgun_sequence|gi|297210125|ref|NZ_GG774486.1|	9.443	90.557	200	1918	2118
Staphylococcus_#_aureus_!_subsp._{_aureus_}_Btn1260_genomic_scaffold_supercont1.10_whole_genome_shotgun_sequence|gi|282906262|ref|NZ_GG730265.1|	0.139	99.861	200	143614	143814
Staphylococcus_#_aureus_!_subsp._{_aureus_}_C101_genomic_scaffold_supercont1.11_whole_genome_shotgun_sequence|gi|282924532|ref|NZ_GG730130.1|	0.112	99.888	200	179113	179313
Staphylococcus_#_aureus_!_subsp._{_aureus_}_C101_genomic_scaffold_supercont1.15_whole_genome_shotgun_sequence|gi|282925249|ref|NZ_GG730134.1|	1.443	98.557	200	13662	13862
Staphylococcus_#_aureus_!_subsp._{_aureus_}_C101_genomic_scaffold_supercont1.7_whole_genome_shotgun_sequence|gi|282923720|ref|NZ_GG730126.1|	0.684	99.316	200	29046	29246
Staphylococcus_#_aureus_!_subsp._{_aureus_}_C160_genomic_scaffold_supercont1.10_whole_genome_shotgun_sequence|gi|282904457|ref|NZ_GG730282.1|	0.198	99.802	200	100897	101097
Staphylococcus_#_aureus_!_subsp._{_aureus_}_CM05_genomic_scaffold_Scfld401_whole_genome_shotgun_sequence|gi|424774983|ref|NZ_JH806557.1|	0.118	99.882	200	169199	169399
Staphylococcus_#_aureus_!_subsp._{_aureus_}_D139_genomic_scaffold_supercont1.10_whole_genome_shotgun_sequence|gi|282915839|ref|NZ_GG730168.1|	0.133	99.867	200	150546	150746
Staphylococcus_#_aureus_!_subsp._{_aureus_}_M1015_genomic_scaffold_supercont1.14_whole_genome_shotgun_sequence|gi|293545390|ref|NZ_GG749009.1|	1.443	98.557	200	13661	13861
Staphylococcus_#_aureus_!_subsp._{_aureus_}_M1015_genomic_scaffold_supercont1.5_whole_genome_shotgun_sequence|gi|293526322|ref|NZ_GG749000.1|	0.684	99.316	200	29030	29230
Staphylococcus_#_aureus_!_subsp._{_aureus_}_M809_genomic_scaffold_supercont1.18_whole_genome_shotgun_sequence|gi|293510791|ref|NZ_GG749316.1|	1.443	98.557	200	13662	13862
Staphylococcus_#_aureus_!_subsp._{_aureus_}_M809_genomic_scaffold_supercont1.9_whole_genome_shotgun_sequence|gi|293509736|ref|NZ_GG749307.1|	0.692	99.308	200	28700	28900
Staphylococcus_#_aureus_!_subsp._{_aureus_}_M876_genomic_scaffold_supercont1.12_whole_genome_shotgun_sequence|gi|257436992|ref|NZ_GG700625.1|	0.25	99.75	200	79825	80025
Staphylococcus_#_aureus_!_subsp._{_aureus_}_M899_genomic_scaffold_supercont1.12_whole_genome_shotgun_sequence|gi|282914805|ref|NZ_GG730201.1|	1.443	98.557	200	13661	13861
Staphylococcus_#_aureus_!_subsp._{_aureus_}_M899_genomic_scaffold_supercont1.6_whole_genome_shotgun_sequence|gi|282913742|ref|NZ_GG730195.1|	0.679	99.321	200	29250	29450
Staphylococcus_#_aureus_!_subsp._{_aureus_}_MRSA131_genomic_scaffold_Scfld118_whole_genome_shotgun_sequence|gi|422745902|ref|NZ_GL638178.1|	1.053	98.947	200	18790	18990
Staphylococcus_#_aureus_!_subsp._{_aureus_}_MRSA131_genomic_scaffold_Scfld18_whole_genome_shotgun_sequence|gi|422744992|ref|NZ_GL638165.1|	0.292	99.708	200	68282	68482
Staphylococcus_#_aureus_!_subsp._{_aureus_}_MRSA131_genomic_scaffold_Scfld383_whole_genome_shotgun_sequence|gi|422747240|ref|NZ_GL638196.1|	0.517	99.483	200	38476	38676
Staphylococcus_#_aureus_!_subsp._{_aureus_}_MRSA131_genomic_scaffold_Scfld78_whole_genome_shotgun_sequence|gi|422745396|ref|NZ_GL638174.1|	1.914	98.086	200	10250	10450
Staphylococcus_#_aureus_!_subsp._{_aureus_}_MRSA177_genomic_scaffold_Scfld278_whole_genome_shotgun_sequence|gi|422744029|ref|NZ_GL638231.1|	3.476	96.524	200	5553	5753
Staphylococcus_#_aureus_!_subsp._{_aureus_}_MRSA177_genomic_scaffold_Scfld39_whole_genome_shotgun_sequence|gi|422742487|ref|NZ_GL638204.1|	0.518	99.482	200	38418	38618
Staphylococcus_#_aureus_!_subsp._{_aureus_}_MRSA177_genomic_scaffold_Scfld43_whole_genome_shotgun_sequence|gi|422742736|ref|NZ_GL638206.1|	1.914	98.086	200	10250	10450
Staphylococcus_#_aureus_!_subsp._{_aureus_}_MRSA177_genomic_scaffold_Scfld74_whole_genome_shotgun_sequence|gi|422743355|ref|NZ_GL638218.1|	0.8	99.2	200	24809	25009
Staphylococcus_#_aureus_!_subsp._{_aureus_}_ST228_plasmid_pI1T1_complete_sequence_isolate_10388|gi|472455754|ref|NC_020530.1|	0.648	99.352	200	30654	30854
Staphylococcus_#_aureus_!_subsp._{_aureus_}_ST228_plasmid_pI2T2_complete_sequence_isolate_10497|gi|472455776|ref|NC_020531.1|	0.648	99.352	200	30654	30854
Staphylococcus_#_aureus_!_subsp._{_aureus_}_ST228_plasmid_pI3T3_complete_sequence_isolate_15532|gi|469823627|ref|NC_020565.1|	0.621	99.379	200	31984	32184
Staphylococcus_#_aureus_!_subsp._{_aureus_}_ST228_plasmid_pI4T8_complete_sequence_isolate_16035|gi|469816271|ref|NC_020534.1|	0.648	99.352	200	30653	30853
Staphylococcus_#_aureus_!_subsp._{_aureus_}_ST228_plasmid_pI5S5_complete_sequence_isolate_16125|gi|469816294|ref|NC_020535.1|	0.536	99.464	200	37085	37285
Staphylococcus_#_aureus_!_subsp._{_aureus_}_ST228_plasmid_pI6T6_complete_sequence_isolate_18341|gi|472455813|ref|NC_020567.1|	0.612	99.388	200	32500	32700
Staphylococcus_#_aureus_!_subsp._{_aureus_}_ST398_plasmid_pUR3912_isolate_C3912_complete_sequence|gi|507527156|ref|NC_020183.2|	3.238	96.762	200	5976	6176
Staphylococcus_#_aureus_!_subsp._{_aureus_}_TCH130_genomic_scaffold_SCAFFOLD12_whole_genome_shotgun_sequence|gi|255925774|ref|NZ_GG698169.1|	0.513	99.487	200	38781	38981
Staphylococcus_#_aureus_!_subsp._{_aureus_}_TW20_plasmid_pTW20_1_complete_sequence|gi|387144420|ref|NC_017352.1|	0.676	99.324	200	29385	29585
Staphylococcus_#_aureus_!_subsp._{_aureus_}_USA300_TCH959_genomic_scaffold_SCAFFOLD7_whole_genome_shotgun_sequence|gi|255926323|ref|NZ_GG697991.1|	0.516	99.484	200	38569	38769
Staphylococcus_#_aureus_!_subsp._{_aureus_}_WW2703/97_genomic_scaffold_supercont1.10_whole_genome_shotgun_sequence|gi|282907893|ref|NZ_GG730229.1|	0.235	99.765	200	85026	85226
Staphylococcus_#_aureus_!_subsp._{_aureus_}_WW2703/97_genomic_scaffold_supercont1.31_whole_genome_shotgun_sequence|gi|282909479|ref|NZ_GG730250.1|	0.365	99.635	200	54654	54854
Staphylococcus_#_aureus_!_subsp._{_aureus_}_WW2703/97_genomic_scaffold_supercont1.9_whole_genome_shotgun_sequence|gi|282907844|ref|NZ_GG730228.1|	0.361	99.639	200	55186	55386
Staphylococcus_#_caprae_!_C87_{_genomic_}_scaffold_supercont1.11_whole_genome_shotgun_sequence|gi|314934229|ref|NZ_GL545277.1|	3.308	96.692	200	5846	6046
Staphylococcus_#_caprae_!_C87_{_genomic_}_scaffold_supercont1.5_whole_genome_shotgun_sequence|gi|314932855|ref|NZ_GL545271.1|	0.083	99.917	200	240689	240889
Staphylococcus_#_caprae_!_C87_{_genomic_}_scaffold_supercont1.6_whole_genome_shotgun_sequence|gi|314933097|ref|NZ_GL545272.1|	0.02	99.98	200	978493	978693
Staphylococcus_#_epidermidis_!_BCM-HMP0060_{_genomic_}_scaffold_SCAFFOLD2_whole_genome_shotgun_sequence|gi|254281371|ref|NZ_GG696728.1|	0.015	99.985	200	1338786	1338986
Staphylococcus_#_epidermidis_!_M0881_{_genomic_}_scaffold_acumm-supercont1.3_whole_genome_shotgun_sequence|gi|489047070|ref|NZ_KB821723.1|	0.161	99.839	200	124046	124246
Staphylococcus_#_epidermidis_!_M23864:W1_{_genomic_}_scaffold_SCAFFOLD2_whole_genome_shotgun_sequence|gi|254213012|ref|NZ_GG696774.1|	0.021	99.979	200	949420	949620
Staphylococcus_#_epidermidis_!_M23864:W2(grey)_{_genomic_}_scaffold_SCAFFOLD2_whole_genome_shotgun_sequence|gi|293368504|ref|NZ_GG749256.1|	0.036	99.964	200	561244	561444
Staphylococcus_#_epidermidis_!_RP62A_{_plasmid_}_pSERP_complete_sequence|gi|57854744|ref|NC_006663.1|	0.732	99.268	200	27110	27310
Staphylococcus_#_epidermidis_!_SK398_{_plasmid_}_pSK639_complete_sequence|gi|42761430|ref|NC_005566.1|	2.496	97.504	200	7813	8013
Staphylococcus_#_epidermidis_!_W23144_{_genomic_}_scaffold_SCAFFOLD1_whole_genome_shotgun_sequence|gi|254212919|ref|NZ_GG696799.1|	0.015	99.985	200	1365325	1365525
Staphylococcus_#_lugdunensis_!_M23590_{_genomic_}_scaffold_SCAFFOLD7_whole_genome_shotgun_sequence|gi|319430690|ref|NZ_GL622357.1|	11.983	88.017	200	1469	1669
Staphylococcus_#_sp._!_HGB0015_{_genomic_}_scaffold_aczIz-supercont1.3_whole_genome_shotgun_sequence|gi|512478285|ref|NZ_KE150419.1|	0.483	99.517	200	41191	41391
Staphylococcus_#_warneri_!_SG1_{_plasmid_}_clone_pvSw1_genomic_sequence|gi|462045533|ref|NC_020274.1|	1.517	98.483	200	12986	13186
Staphylococcus_#_aureus_!_subsp._{_aureus_}_MRSA131_genomic_scaffold_Scfld60_whole_genome_shotgun_sequence|gi|422745364|ref|NZ_GL638173.1|	0.58	99.42	187	32077	32264
Staphylococcus_#_aureus_!_subsp._{_aureus_}_MRSA177_genomic_scaffold_Scfld67_whole_genome_shotgun_sequence|gi|422743115|ref|NZ_GL638215.1|	0.58	99.42	187	32077	32264
Staphylococcus_#_aureus_!_subsp._{_aureus_}_MRSA177_genomic_scaffold_Scfld56_whole_genome_shotgun_sequence|gi|422742934|ref|NZ_GL638211.1|	0.866	99.134	165	18884	19049
Staphylococcus_#_aureus_!_subsp._{_aureus_}_TCH130_genomic_scaffold_SCAFFOLD14_whole_genome_shotgun_sequence|gi|255925776|ref|NZ_GG698171.1|	0.726	99.274	150	20520	20670
Staphylococcus_#_aureus_!_B147830_{_genomic_}_scaffold_acqwB-supercont1.4_whole_genome_shotgun_sequence|gi|486332219|ref|NZ_KB822314.1|	0.012	99.988	101	830168	830269
Staphylococcus_#_aureus_!_M0108_{_genomic_}_scaffold_acunZ-supercont1.4_whole_genome_shotgun_sequence|gi|487358654|ref|NZ_KB821036.1|	0.017	99.983	101	590897	590998
Staphylococcus_#_aureus_!_M0213_{_genomic_}_scaffold_acqwL-supercont1.3_whole_genome_shotgun_sequence|gi|487373880|ref|NZ_KB821117.1|	0.007	99.993	101	1428788	1428889
Staphylococcus_#_aureus_!_M0364_{_genomic_}_scaffold_acqwM-supercont1.3_whole_genome_shotgun_sequence|gi|486287226|ref|NZ_KB821266.1|	0.008	99.992	101	1227014	1227115
Staphylococcus_#_aureus_!_M0676_{_genomic_}_scaffold_acvqP-supercont1.3_whole_genome_shotgun_sequence|gi|486364032|ref|NZ_KB821573.1|	0.017	99.983	101	605121	605222
Staphylococcus_#_aureus_!_M0687_{_genomic_}_scaffold_acvqC-supercont1.2_whole_genome_shotgun_sequence|gi|486365630|ref|NZ_KB821578.1|	0.061	99.939	101	166792	166893
Staphylococcus_#_aureus_!_M0871_{_genomic_}_scaffold_acumy-supercont1.3_whole_genome_shotgun_sequence|gi|487384546|ref|NZ_KB821703.1|	0.017	99.983	101	597080	597181
Staphylococcus_#_aureus_!_M0927_{_genomic_}_scaffold_aculU-supercont1.4_whole_genome_shotgun_sequence|gi|487387406|ref|NZ_KB821754.1|	0.013	99.987	101	804921	805022
Staphylococcus_#_aureus_!_M1037_{_genomic_}_scaffold_acvqz-supercont1.3_whole_genome_shotgun_sequence|gi|486410440|ref|NZ_KB821922.1|	0.012	99.988	101	809011	809112
Staphylococcus_#_aureus_!_M1062_{_genomic_}_scaffold_aculY-supercont1.3_whole_genome_shotgun_sequence|gi|487394159|ref|NZ_KB821914.1|	0.012	99.988	101	809547	809648
Staphylococcus_#_aureus_!_M1093_{_genomic_}_scaffold_acumQ-supercont1.3_whole_genome_shotgun_sequence|gi|486424345|ref|NZ_KB821948.1|	0.012	99.988	101	858262	858363
Staphylococcus_#_aureus_!_M1126_{_genomic_}_scaffold_acumd-supercont1.5_whole_genome_shotgun_sequence|gi|487395941|ref|NZ_KB822002.1|	0.016	99.984	101	632631	632732
Staphylococcus_#_aureus_!_M1248_{_genomic_}_scaffold_acunw-supercont1.3_whole_genome_shotgun_sequence|gi|486648723|ref|NZ_KB822101.1|	0.014	99.986	101	741376	741477
Staphylococcus_#_aureus_!_M1405_{_genomic_}_scaffold_acumh-supercont1.3_whole_genome_shotgun_sequence|gi|487399052|ref|NZ_KB822543.1|	0.013	99.987	101	805130	805231
Staphylococcus_#_aureus_!_M1450_{_genomic_}_scaffold_acumw-supercont1.3_whole_genome_shotgun_sequence|gi|487109353|ref|NZ_KB822234.1|	0.013	99.987	101	804458	804559
Staphylococcus_#_aureus_!_M1578_{_genomic_}_scaffold_aculL-supercont1.2_whole_genome_shotgun_sequence|gi|487219486|ref|NZ_KB822321.1|	0.01	99.99	101	1037975	1038076
Staphylococcus_#_lugdunensis_!_ACS-027-V-Sch2_{_genomic_}_scaffold_supercont1.2_whole_genome_shotgun_sequence|gi|448879134|ref|NZ_KB373323.1|	0.023	99.977	101	444874	444975
Staphylococcus_#_lugdunensis_!_M23590_{_genomic_}_scaffold_SCAFFOLD2_whole_genome_shotgun_sequence|gi|319430685|ref|NZ_GL622352.1|	0.01	99.99	101	1009886	1009987
Allofustis_#_seminis_!_DSM_{_15817_}_C231DRAFT_scaffold00012.12_whole_genome_shotgun_sequence|gi|483999899|ref|NZ_KB894090.1|	1.988	98.012	100	4931	5031
Anoxybacillus_#_flavithermus_!_WK1_{_chromosome_}_complete_genome|gi|212637849|ref|NC_011567.1|	0.004	99.996	100	2846646	2846746
Bacillus_#_cereus_!_B5-2_{_genomic_}_scaffold_acqwr-supercont1.2_whole_genome_shotgun_sequence|gi|507066179|ref|NZ_KB976965.1|	0.193	99.807	100	51810	51910
Bacillus_#_cereus_!_B5-2_{_genomic_}_scaffold_acqwr-supercont1.3_whole_genome_shotgun_sequence|gi|507066201|ref|NZ_KB976972.1|	0.159	99.841	100	62951	63051
Bacillus_#_cereus_!_BAG1O-1_{_genomic_}_scaffold_acrHm-supercont1.1_whole_genome_shotgun_sequence|gi|506987569|ref|NZ_KB976287.1|	0.136	99.864	100	73440	73540
Bacillus_#_cereus_!_BAG1O-1_{_genomic_}_scaffold_acrHm-supercont1.5_whole_genome_shotgun_sequence|gi|506987770|ref|NZ_KB976295.1|	0.48	99.52	100	20723	20823
Bacillus_#_cereus_!_BAG1O-3_{_genomic_}_scaffold_supercont1.2_whole_genome_shotgun_sequence|gi|514961978|ref|NZ_KE332537.1|	0.015	99.985	100	662935	663035
Bacillus_#_cereus_!_BAG1O-3_{_genomic_}_scaffold_supercont1.7_whole_genome_shotgun_sequence|gi|514961983|ref|NZ_KE332542.1|	0.088	99.912	100	113186	113286
Bacillus_#_cereus_!_BAG1X2-1_{_genomic_}_scaffold_acfXL-supercont1.1_whole_genome_shotgun_sequence|gi|506995657|ref|NZ_KB976207.1|	0.002	99.998	100	5281877	5281977
Bacillus_#_cereus_!_BAG1X2-2_{_genomic_}_scaffold_achrl-supercont1.1_whole_genome_shotgun_sequence|gi|506995866|ref|NZ_KB976220.1|	0.002	99.998	100	5320206	5320306
Bacillus_#_cereus_!_BAG1X2-3_{_genomic_}_scaffold_acrGT-supercont1.11_whole_genome_shotgun_sequence|gi|506997465|ref|NZ_KB976237.1|	0.002	99.998	100	4611369	4611469
Bacillus_#_cereus_!_BAG1X2-3_{_genomic_}_scaffold_acrGT-supercont1.3_whole_genome_shotgun_sequence|gi|506999242|ref|NZ_KB976247.1|	0.035	99.965	100	282555	282655
Bacillus_#_cereus_!_BAG3O-1_{_genomic_}_scaffold_acqxM-supercont1.1_whole_genome_shotgun_sequence|gi|507062631|ref|NZ_KB976979.1|	0.145	99.855	100	69067	69167
Bacillus_#_cereus_!_HuA2-3_{_genomic_}_scaffold_acrHg-supercont1.9_whole_genome_shotgun_sequence|gi|507019249|ref|NZ_KB976671.1|	0.002	99.998	100	4008303	4008403
Bacillus_#_cereus_!_HuA2-9_{_genomic_}_scaffold_acqVt-supercont1.2_whole_genome_shotgun_sequence|gi|507021360|ref|NZ_KB976153.1|	0.005	99.995	100	2159402	2159502
Bacillus_#_cereus_!_HuA3-9_{_genomic_}_scaffold_acqVv-supercont1.12_whole_genome_shotgun_sequence|gi|507023042|ref|NZ_KB976128.1|	0.098	99.902	100	101481	101581
Bacillus_#_cereus_!_HuA3-9_{_genomic_}_scaffold_acqVv-supercont1.14_whole_genome_shotgun_sequence|gi|507023105|ref|NZ_KB976130.1|	0.161	99.839	100	61936	62036
Bacillus_#_cereus_!_HuA3-9_{_genomic_}_scaffold_acqVv-supercont1.15_whole_genome_shotgun_sequence|gi|507023118|ref|NZ_KB976131.1|	0.189	99.811	100	52756	52856
Bacillus_#_cereus_!_HuA3-9_{_genomic_}_scaffold_acqVv-supercont1.17_whole_genome_shotgun_sequence|gi|507023156|ref|NZ_KB976133.1|	0.507	99.493	100	19606	19706
Bacillus_#_cereus_!_HuA3-9_{_genomic_}_scaffold_acqVv-supercont1.18_whole_genome_shotgun_sequence|gi|507023161|ref|NZ_KB976134.1|	0.51	99.49	100	19491	19591
Bacillus_#_cereus_!_HuA3-9_{_genomic_}_scaffold_acqVv-supercont1.23_whole_genome_shotgun_sequence|gi|507023806|ref|NZ_KB976140.1|	1.365	98.635	100	7224	7324
Bacillus_#_cereus_!_HuA3-9_{_genomic_}_scaffold_acqVv-supercont1.7_whole_genome_shotgun_sequence|gi|507024975|ref|NZ_KB976149.1|	0.043	99.957	100	233254	233354
Bacillus_#_cereus_!_HuA4-10_{_genomic_}_scaffold_supercont1.4_whole_genome_shotgun_sequence|gi|423526068|ref|NZ_JH792151.1|	0.045	99.955	100	223035	223135
Bacillus_#_cereus_!_HuA4-10_{_genomic_}_scaffold_supercont1.6_whole_genome_shotgun_sequence|gi|423526347|ref|NZ_JH792153.1|	0.164	99.836	100	60985	61085
Bacillus_#_cereus_!_HuB4-4_{_genomic_}_scaffold_acqVu-supercont1.1_whole_genome_shotgun_sequence|gi|507027221|ref|NZ_KB976537.1|	0.002	99.998	100	5676624	5676724
Bacillus_#_cereus_!_MC118_{_genomic_}_scaffold_actXO-supercont1.169_whole_genome_shotgun_sequence|gi|507028493|ref|NZ_KB976415.1|	4.016	95.984	100	2390	2490
Bacillus_#_cereus_!_MC67_{_genomic_}_scaffold_supercont1.2_whole_genome_shotgun_sequence|gi|423557538|ref|NZ_JH792114.1|	0.004	99.996	100	2310071	2310171
Bacillus_#_cereus_!_TIAC219_{_genomic_}_scaffold_actab-supercont2.31_whole_genome_shotgun_sequence|gi|505484174|ref|NZ_KB976032.1|	1.386	98.614	100	7114	7214
Bacillus_#_cereus_!_TIAC219_{_genomic_}_scaffold_actab-supercont2.4_whole_genome_shotgun_sequence|gi|505484194|ref|NZ_KB976039.1|	0.022	99.978	100	461427	461527
Bacillus_#_cereus_!_TIAC219_{_genomic_}_scaffold_actab-supercont2.8_whole_genome_shotgun_sequence|gi|505484250|ref|NZ_KB976043.1|	0.046	99.954	100	216332	216432
Bacillus_#_cereus_!_VD021_{_genomic_}_scaffold_acqVy-supercont1.13_whole_genome_shotgun_sequence|gi|507029702|ref|NZ_KB976277.1|	0.367	99.633	100	27138	27238
Bacillus_#_cereus_!_VD021_{_genomic_}_scaffold_acqVy-supercont1.4_whole_genome_shotgun_sequence|gi|507030643|ref|NZ_KB976281.1|	0.015	99.985	100	658327	658427
Bacillus_#_cereus_!_VD021_{_genomic_}_scaffold_acqVy-supercont1.8_whole_genome_shotgun_sequence|gi|507031567|ref|NZ_KB976285.1|	0.038	99.962	100	259738	259838
Bacillus_#_cereus_!_VD021_{_genomic_}_scaffold_acqVy-supercont1.9_whole_genome_shotgun_sequence|gi|507031587|ref|NZ_KB976286.1|	0.105	99.895	100	95015	95115
Bacillus_#_cereus_!_VD048_{_genomic_}_scaffold_supercont1.1_whole_genome_shotgun_sequence|gi|423591132|ref|NZ_JH792310.1|	0.002	99.998	100	4064364	4064464
Bacillus_#_cereus_!_VD048_{_genomic_}_scaffold_supercont1.2_whole_genome_shotgun_sequence|gi|423595279|ref|NZ_JH792311.1|	0.016	99.984	100	641267	641367
Bacillus_#_cereus_!_VD048_{_genomic_}_scaffold_supercont1.5_whole_genome_shotgun_sequence|gi|423596465|ref|NZ_JH792314.1|	0.041	99.959	100	241905	242005
Bacillus_#_cereus_!_VD048_{_genomic_}_scaffold_supercont1.7_whole_genome_shotgun_sequence|gi|423596849|ref|NZ_JH792316.1|	0.079	99.921	100	126493	126593
Bacillus_#_cereus_!_VD048_{_genomic_}_scaffold_supercont1.8_whole_genome_shotgun_sequence|gi|423596967|ref|NZ_JH792317.1|	0.159	99.841	100	62912	63012
Bacillus_#_cereus_!_VD107_{_genomic_}_scaffold_supercont1.1_whole_genome_shotgun_sequence|gi|423609285|ref|NZ_JH792232.1|	0.003	99.997	100	3667886	3667986
Bacillus_#_cereus_!_VD107_{_genomic_}_scaffold_supercont1.2_whole_genome_shotgun_sequence|gi|423613053|ref|NZ_JH792233.1|	0.015	99.985	100	671930	672030
Bacillus_#_cereus_!_VD107_{_genomic_}_scaffold_supercont1.5_whole_genome_shotgun_sequence|gi|423614469|ref|NZ_JH792236.1|	0.061	99.939	100	164705	164805
Bacillus_#_cereus_!_VD115_{_genomic_}_scaffold_supercont1.4_whole_genome_shotgun_sequence|gi|423619848|ref|NZ_JH792168.1|	0.021	99.979	100	474791	474891
Bacillus_#_cereus_!_VD115_{_genomic_}_scaffold_supercont1.5_whole_genome_shotgun_sequence|gi|423620333|ref|NZ_JH792169.1|	0.036	99.964	100	275252	275352
Bacillus_#_cereus_!_VD115_{_genomic_}_scaffold_supercont1.6_whole_genome_shotgun_sequence|gi|423620638|ref|NZ_JH792170.1|	0.045	99.955	100	221935	222035
Bacillus_#_cereus_!_VD118_{_genomic_}_scaffold_acrHo-supercont1.1_whole_genome_shotgun_sequence|gi|507031628|ref|NZ_KB976791.1|	0.087	99.913	100	114438	114538
Bacillus_#_cereus_!_VD118_{_genomic_}_scaffold_acrHo-supercont1.2_whole_genome_shotgun_sequence|gi|507031872|ref|NZ_KB976793.1|	0.02	99.98	100	510065	510165
Bacillus_#_cereus_!_VD118_{_genomic_}_scaffold_acrHo-supercont1.9_whole_genome_shotgun_sequence|gi|507035131|ref|NZ_KB976800.1|	0.005	99.995	100	1999424	1999524
Bacillus_#_cereus_!_VD131_{_genomic_}_scaffold_acrHi-supercont1.1_whole_genome_shotgun_sequence|gi|507035141|ref|NZ_KB976647.1|	0.18	99.82	100	55535	55635
Bacillus_#_cereus_!_VD136_{_genomic_}_scaffold_acrHc-supercont1.11_whole_genome_shotgun_sequence|gi|507041510|ref|NZ_KB976719.1|	0.051	99.949	100	195236	195336
Bacillus_#_cereus_!_VD136_{_genomic_}_scaffold_acrHc-supercont1.4_whole_genome_shotgun_sequence|gi|507045922|ref|NZ_KB976734.1|	0.157	99.843	100	63705	63805
Bacillus_#_cereus_!_VD136_{_genomic_}_scaffold_acrHc-supercont1.5_whole_genome_shotgun_sequence|gi|507045995|ref|NZ_KB976735.1|	0.127	99.873	100	78829	78929
Bacillus_#_cereus_!_VD142_{_genomic_}_scaffold_actaa-supercont2.4_whole_genome_shotgun_sequence|gi|514341272|ref|NZ_KE150047.1|	0.017	99.983	100	597313	597413
Bacillus_#_cereus_!_VD142_{_genomic_}_scaffold_actaa-supercont2.8_whole_genome_shotgun_sequence|gi|514343586|ref|NZ_KE150051.1|	0.047	99.953	100	212349	212449
Bacillus_#_cereus_!_VD146_{_genomic_}_scaffold_acrHl-supercont1.14_whole_genome_shotgun_sequence|gi|507049958|ref|NZ_KB976677.1|	0.003	99.997	100	3880379	3880479
Bacillus_#_cereus_!_VD146_{_genomic_}_scaffold_acrHl-supercont1.7_whole_genome_shotgun_sequence|gi|507050419|ref|NZ_KB976690.1|	0.047	99.953	100	214666	214766
Bacillus_#_cereus_!_VD146_{_genomic_}_scaffold_acrHl-supercont1.9_whole_genome_shotgun_sequence|gi|507050474|ref|NZ_KB976692.1|	2.303	97.697	100	4243	4343
Bacillus_#_cereus_!_VD148_{_genomic_}_scaffold_supercont1.1_whole_genome_shotgun_sequence|gi|423621402|ref|NZ_JH792156.1|	0.002	99.998	100	4649779	4649879
Bacillus_#_cereus_!_VD154_{_genomic_}_scaffold_supercont1.2_whole_genome_shotgun_sequence|gi|423629043|ref|NZ_JH791881.1|	0.007	99.993	100	1513361	1513461
Bacillus_#_cereus_!_VD154_{_genomic_}_scaffold_supercont1.3_whole_genome_shotgun_sequence|gi|423630605|ref|NZ_JH791882.1|	0.008	99.992	100	1294099	1294199
Bacillus_#_cereus_!_VD214_{_genomic_}_scaffold_acrHq-supercont1.5_whole_genome_shotgun_sequence|gi|507055511|ref|NZ_KB976703.1|	3.568	96.432	100	2703	2803
Bacillus_#_cereus_!_VDM006_{_genomic_}_scaffold_acrHb-supercont1.12_whole_genome_shotgun_sequence|gi|507060297|ref|NZ_KB976867.1|	0.051	99.949	100	195708	195808
Bacillus_#_cereus_!_VDM006_{_genomic_}_scaffold_acrHb-supercont1.1_whole_genome_shotgun_sequence|gi|507060269|ref|NZ_KB976864.1|	0.019	99.981	100	538095	538195
Bacillus_#_cereus_!_VDM006_{_genomic_}_scaffold_acrHb-supercont1.2_whole_genome_shotgun_sequence|gi|507060723|ref|NZ_KB976875.1|	0.188	99.812	100	53158	53258
Bacillus_#_cereus_!_VDM006_{_genomic_}_scaffold_acrHb-supercont1.30_whole_genome_shotgun_sequence|gi|507061265|ref|NZ_KB976887.1|	0.009	99.991	100	1072334	1072434
Bacillus_#_cereus_!_VDM006_{_genomic_}_scaffold_acrHb-supercont1.4_whole_genome_shotgun_sequence|gi|507061374|ref|NZ_KB976897.1|	0.127	99.873	100	78705	78805
Bacillus_#_cereus_!_VDM006_{_genomic_}_scaffold_acrHb-supercont1.6_whole_genome_shotgun_sequence|gi|507061387|ref|NZ_KB976901.1|	1.786	98.214	100	5498	5598
Bacillus_#_cereus_!_VDM006_{_genomic_}_scaffold_acrHb-supercont1.7_whole_genome_shotgun_sequence|gi|507061389|ref|NZ_KB976902.1|	1.601	98.399	100	6148	6248
Bacillus_#_cereus_!_VDM006_{_genomic_}_scaffold_acrHb-supercont1.8_whole_genome_shotgun_sequence|gi|507061397|ref|NZ_KB976903.1|	0.827	99.173	100	11992	12092
Bacillus_#_cereus_!_VDM006_{_genomic_}_scaffold_acrHb-supercont1.9_whole_genome_shotgun_sequence|gi|507061520|ref|NZ_KB976904.1|	0.04	99.96	100	247668	247768
Bacillus_#_cereus_!_VDM019_{_genomic_}_scaffold_achrj-supercont1.1_whole_genome_shotgun_sequence|gi|507056656|ref|NZ_KB976196.1|	0.002	99.998	100	4575587	4575687
Bacillus_#_cereus_!_VDM019_{_genomic_}_scaffold_achrj-supercont1.2_whole_genome_shotgun_sequence|gi|507056808|ref|NZ_KB976199.1|	0.014	99.986	100	706303	706403
Bacillus_#_cereus_!_VDM021_{_genomic_}_scaffold_acrHe-supercont1.10_whole_genome_shotgun_sequence|gi|507061630|ref|NZ_KB976906.1|	2.037	97.963	100	4810	4910
Bacillus_#_cereus_!_VDM021_{_genomic_}_scaffold_acrHe-supercont1.11_whole_genome_shotgun_sequence|gi|507061633|ref|NZ_KB976907.1|	0.937	99.063	100	10573	10673
Bacillus_#_cereus_!_VDM021_{_genomic_}_scaffold_acrHe-supercont1.1_whole_genome_shotgun_sequence|gi|507061629|ref|NZ_KB976905.1|	0.017	99.983	100	596905	597005
Bacillus_#_cereus_!_VDM021_{_genomic_}_scaffold_acrHe-supercont1.3_whole_genome_shotgun_sequence|gi|507062122|ref|NZ_KB976927.1|	0.193	99.807	100	51676	51776
Bacillus_#_cereus_!_VDM021_{_genomic_}_scaffold_acrHe-supercont1.9_whole_genome_shotgun_sequence|gi|507062626|ref|NZ_KB976953.1|	2.196	97.804	100	4454	4554
Bacillus_#_cereus_!_VDM022_{_genomic_}_scaffold_supercont1.2_whole_genome_shotgun_sequence|gi|423664302|ref|NZ_JH791838.1|	0.022	99.978	100	452764	452864
Bacillus_#_cereus_!_VDM034_{_genomic_}_scaffold_supercont1.1_whole_genome_shotgun_sequence|gi|423666303|ref|NZ_JH791809.1|	0.002	99.998	100	4767824	4767924
Bacillus_#_cereus_!_VDM034_{_genomic_}_scaffold_supercont1.3_whole_genome_shotgun_sequence|gi|423671527|ref|NZ_JH791811.1|	0.023	99.977	100	435270	435370
Bacillus_#_cereus_!_VDM053_{_genomic_}_scaffold_acrGS-supercont1.2_whole_genome_shotgun_sequence|gi|507057388|ref|NZ_KB976709.1|	0.029	99.971	100	349180	349280
Bacillus_#_cereus_!_VDM062_{_genomic_}_scaffold_supercont1.2_whole_genome_shotgun_sequence|gi|423677436|ref|NZ_JH791803.1|	0.023	99.977	100	432214	432314
Bacillus_#_cereus_!_str._{_Schrouff_}_genomic_scaffold_acsZZ-supercont2.11_whole_genome_shotgun_sequence|gi|506986687|ref|NZ_KB976109.1|	0.52	99.48	100	19129	19229
Bacillus_#_cereus_!_str._{_Schrouff_}_genomic_scaffold_acsZZ-supercont2.4_whole_genome_shotgun_sequence|gi|506987193|ref|NZ_KB976119.1|	0.046	99.954	100	216408	216508
Bacillus_#_mojavensis_!_RO-H-1_{_genomic_}_scaffold_gbs2c.contig.1_whole_genome_shotgun_sequence|gi|397738182|ref|NZ_JH600278.1|	0.152	99.848	100	65831	65931
Bacillus_#_mojavensis_!_RO-H-1_{_genomic_}_scaffold_gbs2c.contig.3_whole_genome_shotgun_sequence|gi|397738184|ref|NZ_JH600280.1|	0.037	99.963	100	267020	267120
Bacillus_#_mojavensis_!_RO-H-1_{_genomic_}_scaffold_gbs2c.contig.4_whole_genome_shotgun_sequence|gi|397738185|ref|NZ_JH600281.1|	0.493	99.507	100	20173	20273
Bacillus_#_mojavensis_!_RO-H-1_{_genomic_}_scaffold_gbs2c.contig.5_whole_genome_shotgun_sequence|gi|397738186|ref|NZ_JH600282.1|	1.944	98.056	100	5044	5144
Bacillus_#_mojavensis_!_RO-H-1_{_genomic_}_scaffold_gbs2c.contig.6_whole_genome_shotgun_sequence|gi|397738187|ref|NZ_JH600283.1|	0.117	99.883	100	85226	85326
Bacillus_#_mojavensis_!_RO-H-1_{_genomic_}_scaffold_gbs2c.contig.7_whole_genome_shotgun_sequence|gi|397738188|ref|NZ_JH600284.1|	0.017	99.983	100	597247	597347
Bacillus_#_mojavensis_!_RO-H-1_{_genomic_}_scaffold_gbs2c.contig.8_whole_genome_shotgun_sequence|gi|397738189|ref|NZ_JH600285.1|	0.055	99.945	100	181947	182047
Bacillus_#_pumilus_!_S-1_{_scaffold1_}_whole_genome_shotgun_sequence|gi|485473425|ref|NZ_JH137647.1|	3.282	96.718	100	2947	3047
Bacillus_#_sp._!_37MA_{_A3M5DRAFT_scaffold1.1_}_whole_genome_shotgun_sequence|gi|483722481|ref|NZ_KB889752.1|	0.003	99.997	100	3763947	3764047
Bacillus_#_thuringiensis_!_serovar_{_pakistani_}_str._T13001_chromosome_whole_genome_shotgun_sequence|gi|238801502|ref|NZ_CM000750.1|	0.002	99.998	100	6037413	6037513
Bacillus_#_vallismortis_!_DV1-F-3_{_genomic_}_scaffold_scf7180000000874_whole_genome_shotgun_sequence|gi|397738310|ref|NZ_JH600202.1|	0.409	99.591	100	24377	24477
Bacillus_#_vallismortis_!_DV1-F-3_{_genomic_}_scaffold_scf7180000000918_whole_genome_shotgun_sequence|gi|397738351|ref|NZ_JH600243.1|	0.033	99.967	100	300928	301028
Bacillus_#_vallismortis_!_DV1-F-3_{_genomic_}_scaffold_scf7180000000921_whole_genome_shotgun_sequence|gi|397738354|ref|NZ_JH600246.1|	0.167	99.833	100	59744	59844
Bacillus_#_vallismortis_!_DV1-F-3_{_genomic_}_scaffold_scf7180000000924_whole_genome_shotgun_sequence|gi|397738357|ref|NZ_JH600249.1|	0.469	99.531	100	21221	21321
Bacillus_#_vallismortis_!_DV1-F-3_{_genomic_}_scaffold_scf7180000000948_whole_genome_shotgun_sequence|gi|397738381|ref|NZ_JH600273.1|	0.053	99.947	100	187689	187789
Brucella_#_sp._!_NVSL_{_07-0026_}_genomic_scaffold_supercont1.10_whole_genome_shotgun_sequence|gi|294850894|ref|NZ_GG770505.1|	8.562	91.438	100	1068	1168
Enterococcus_#_faecalis_!_B1586_{_genomic_}_scaffold_acHWH-supercont1.3_whole_genome_shotgun_sequence|gi|500991587|ref|NZ_KB932438.1|	0.279	99.721	100	35742	35842
Enterococcus_#_faecalis_!_B1696_{_genomic_}_scaffold_acHXL-supercont1.7_whole_genome_shotgun_sequence|gi|501001055|ref|NZ_KB932459.1|	0.211	99.789	100	47224	47324
Enterococcus_#_faecalis_!_B1851_{_genomic_}_scaffold_acEPj-supercont1.9_whole_genome_shotgun_sequence|gi|505721623|ref|NZ_KB948380.1|	3.398	96.602	100	2843	2943
Enterococcus_#_faecalis_!_B1921_{_genomic_}_scaffold_acEPi-supercont1.15_whole_genome_shotgun_sequence|gi|505721690|ref|NZ_KB948387.1|	5.211	94.789	100	1819	1919
Enterococcus_#_faecalis_!_B1933_{_genomic_}_scaffold_acEPg-supercont1.9_whole_genome_shotgun_sequence|gi|505721719|ref|NZ_KB948416.1|	1.669	98.331	100	5892	5992
Enterococcus_#_faecalis_!_B2207_{_genomic_}_scaffold_acHYl-supercont1.14_whole_genome_shotgun_sequence|gi|501018682|ref|NZ_KB945583.1|	5.482	94.518	100	1724	1824
Enterococcus_#_faecalis_!_B2802_{_genomic_}_scaffold_acEQk-supercont1.29_whole_genome_shotgun_sequence|gi|505728810|ref|NZ_KB948638.1|	3.446	96.554	100	2802	2902
Enterococcus_#_faecalis_!_B2813_{_genomic_}_scaffold_acEQH-supercont1.13_whole_genome_shotgun_sequence|gi|505728828|ref|NZ_KB948656.1|	3.446	96.554	100	2802	2902
Enterococcus_#_faecalis_!_B4259_{_genomic_}_scaffold_acEPm-supercont1.26_whole_genome_shotgun_sequence|gi|505741655|ref|NZ_KB949065.1|	1.186	98.814	100	8332	8432
Enterococcus_#_faecalis_!_B4568_{_genomic_}_scaffold_acEPp-supercont1.25_whole_genome_shotgun_sequence|gi|505750514|ref|NZ_KB949224.1|	1.698	98.302	100	5788	5888
Enterococcus_#_faecalis_!_CH188_{_genomic_}_scaffold_supercont1.24_whole_genome_shotgun_sequence|gi|242359826|ref|NZ_GG688673.1|	15.432	84.568	100	548	648
Enterococcus_#_faecalis_!_CH570_{_genomic_}_scaffold_acEPs-supercont1.12_whole_genome_shotgun_sequence|gi|501877935|ref|NZ_KB947177.1|	2.116	97.884	100	4626	4726
Enterococcus_#_faecalis_!_ERV81_{_genomic_}_scaffold_Scfld864_whole_genome_shotgun_sequence|gi|424734331|ref|NZ_JH805133.1|	1.723	98.277	100	5704	5804
Enterococcus_#_faecalis_!_Merz151_{_genomic_}_scaffold_acAqZ-supercont1.5_whole_genome_shotgun_sequence|gi|502310897|ref|NZ_KB944787.1|	0.019	99.981	100	516425	516525
Enterococcus_#_faecalis_!_SF1592_{_genomic_}_scaffold_acvKc-supercont1.17_whole_genome_shotgun_sequence|gi|501589707|ref|NZ_KB946577.1|	0.507	99.493	100	19617	19717
Enterococcus_#_faecalis_!_SF28073_{_genomic_}_scaffold_acvKg-supercont1.40_whole_genome_shotgun_sequence|gi|501576302|ref|NZ_KB946474.1|	4.577	95.423	100	2085	2185
Enterococcus_#_faecalis_!_SF350_{_genomic_}_scaffold_acHXt-supercont1.6_whole_genome_shotgun_sequence|gi|502435002|ref|NZ_KB933496.1|	0.038	99.962	100	263961	264061
Enterococcus_#_faecalis_!_TX0645_{_genomic_}_scaffold_Scfld25_whole_genome_shotgun_sequence|gi|422731169|ref|NZ_GL457086.1|	12.937	87.063	100	673	773
Enterococcus_#_faecalis_!_WH257_{_genomic_}_scaffold_acvKu-supercont1.22_whole_genome_shotgun_sequence|gi|501585607|ref|NZ_KB946528.1|	0.477	99.523	100	20872	20972
Facklamia_#_hominis_!_ACS-120-V-Sch10_{_genomic_}_scaffold_acBRj-supercont1.2_whole_genome_shotgun_sequence|gi|514960256|ref|NZ_KE340334.1|	0.01	99.99	100	971567	971667
Lactobacillus_#_murinus_!_ASF361_{_genomic_}_scaffold_acLZi-supercont1.3_whole_genome_shotgun_sequence|gi|490151422|ref|NZ_KB822406.1|	0.03	99.97	100	330731	330831
Listeria_#_grayi_!_DSM_{_20601_}_genomic_scaffold_SCAFFOLD2_whole_genome_shotgun_sequence|gi|311744851|ref|NZ_GL538353.1|	0.01	99.99	100	982117	982217
Lysinibacillus_#_sphaericus_!_OT4b.31_{_genomic_}_scaffold_Ls31_scaffold17_whole_genome_shotgun_sequence|gi|499133316|ref|NZ_KB933414.1|	3.317	96.683	100	2915	3015
Staphylococcus_#_aureus_!_B147830_{_genomic_}_scaffold_acqwB-supercont1.5_whole_genome_shotgun_sequence|gi|486332497|ref|NZ_KB822315.1|	0.036	99.964	100	275864	275964
Staphylococcus_#_aureus_!_B147830_{_genomic_}_scaffold_acqwB-supercont1.6_whole_genome_shotgun_sequence|gi|486333150|ref|NZ_KB822316.1|	0.06	99.94	100	167127	167227
Staphylococcus_#_aureus_!_B40723_{_genomic_}_scaffold_acqwm-supercont1.1_whole_genome_shotgun_sequence|gi|486325135|ref|NZ_KB822325.1|	0.022	99.978	100	444922	445022
Staphylococcus_#_aureus_!_B53639_{_genomic_}_scaffold_acqwD-supercont1.5_whole_genome_shotgun_sequence|gi|486323796|ref|NZ_KB822345.1|	0.011	99.989	100	914482	914582
Staphylococcus_#_aureus_!_M0001_{_genomic_}_scaffold_acrHn-supercont1.18_whole_genome_shotgun_sequence|gi|486219440|ref|NZ_KB820936.1|	0.086	99.914	100	115594	115694
Staphylococcus_#_aureus_!_M0001_{_genomic_}_scaffold_acrHn-supercont1.2_whole_genome_shotgun_sequence|gi|486220991|ref|NZ_KB820938.1|	0.008	99.992	100	1188027	1188127
Staphylococcus_#_aureus_!_M0006_{_genomic_}_scaffold_aculO-supercont1.1_whole_genome_shotgun_sequence|gi|487242216|ref|NZ_KB820952.1|	0.008	99.992	100	1297827	1297927
Staphylococcus_#_aureus_!_M0006_{_genomic_}_scaffold_aculO-supercont1.5_whole_genome_shotgun_sequence|gi|487254889|ref|NZ_KB820957.1|	0.199	99.801	100	50033	50133
Staphylococcus_#_aureus_!_M0066_{_genomic_}_scaffold_acqxs-supercont1.1_whole_genome_shotgun_sequence|gi|486236423|ref|NZ_KB820993.1|	0.009	99.991	100	1114591	1114691
Staphylococcus_#_aureus_!_M0075_{_genomic_}_scaffold_acunI-supercont1.4_whole_genome_shotgun_sequence|gi|487399870|ref|NZ_KB822350.1|	0.006	99.994	100	1758816	1758916
Staphylococcus_#_aureus_!_M0077_{_genomic_}_scaffold_acunP-supercont1.1_whole_genome_shotgun_sequence|gi|487349956|ref|NZ_KB820999.1|	0.009	99.991	100	1118555	1118655
Staphylococcus_#_aureus_!_M0077_{_genomic_}_scaffold_acunP-supercont1.3_whole_genome_shotgun_sequence|gi|487350165|ref|NZ_KB821001.1|	0.033	99.967	100	305584	305684
Staphylococcus_#_aureus_!_M0102_{_genomic_}_scaffold_acqwC-supercont1.2_whole_genome_shotgun_sequence|gi|486239442|ref|NZ_KB821007.1|	0.186	99.814	100	53579	53679
Staphylococcus_#_aureus_!_M0102_{_genomic_}_scaffold_acqwC-supercont1.3_whole_genome_shotgun_sequence|gi|486239628|ref|NZ_KB821008.1|	0.236	99.764	100	42209	42309
Staphylococcus_#_aureus_!_M0102_{_genomic_}_scaffold_acqwC-supercont1.6_whole_genome_shotgun_sequence|gi|486241470|ref|NZ_KB821011.1|	0.012	99.988	100	831310	831410
Staphylococcus_#_aureus_!_M0103_{_genomic_}_scaffold_acqxd-supercont1.6_whole_genome_shotgun_sequence|gi|486247172|ref|NZ_KB821019.1|	0.143	99.857	100	69650	69750
Staphylococcus_#_aureus_!_M0103_{_genomic_}_scaffold_acqxd-supercont1.7_whole_genome_shotgun_sequence|gi|486247420|ref|NZ_KB821020.1|	0.155	99.845	100	64342	64442
Staphylococcus_#_aureus_!_M0104_{_genomic_}_scaffold_acrHp-supercont1.1_whole_genome_shotgun_sequence|gi|487372340|ref|NZ_KB821023.1|	0.008	99.992	100	1295801	1295901
Staphylococcus_#_aureus_!_M0144_{_genomic_}_scaffold_acunq-supercont1.1_whole_genome_shotgun_sequence|gi|487359044|ref|NZ_KB821038.1|	0.007	99.993	100	1348934	1349034
Staphylococcus_#_aureus_!_M0154_{_genomic_}_scaffold_acumB-supercont1.10_whole_genome_shotgun_sequence|gi|487359424|ref|NZ_KB821044.1|	0.063	99.937	100	159881	159981
Staphylococcus_#_aureus_!_M0154_{_genomic_}_scaffold_acumB-supercont1.11_whole_genome_shotgun_sequence|gi|487359499|ref|NZ_KB821045.1|	0.014	99.986	100	733395	733495
Staphylococcus_#_aureus_!_M0154_{_genomic_}_scaffold_acumB-supercont1.7_whole_genome_shotgun_sequence|gi|487359703|ref|NZ_KB821051.1|	0.238	99.762	100	41944	42044
Staphylococcus_#_aureus_!_M0173_{_genomic_}_scaffold_acrHj-supercont1.1_whole_genome_shotgun_sequence|gi|486253298|ref|NZ_KB821070.1|	0.006	99.994	100	1786317	1786417
Staphylococcus_#_aureus_!_M0197_{_genomic_}_scaffold_acrGV-supercont1.4_whole_genome_shotgun_sequence|gi|486257772|ref|NZ_KB821087.1|	0.022	99.978	100	458809	458909
Staphylococcus_#_aureus_!_M0200_{_genomic_}_scaffold_acumC-supercont1.12_whole_genome_shotgun_sequence|gi|487360390|ref|NZ_KB821095.1|	0.009	99.991	100	1077123	1077223
Staphylococcus_#_aureus_!_M0200_{_genomic_}_scaffold_acumC-supercont1.4_whole_genome_shotgun_sequence|gi|487360478|ref|NZ_KB821099.1|	0.221	99.779	100	45240	45340
Staphylococcus_#_aureus_!_M0213_{_genomic_}_scaffold_acqwL-supercont1.1_whole_genome_shotgun_sequence|gi|487373688|ref|NZ_KB821115.1|	0.007	99.993	100	1404252	1404352
Staphylococcus_#_aureus_!_M0237_{_genomic_}_scaffold_acrHd-supercont1.5_whole_genome_shotgun_sequence|gi|486261712|ref|NZ_KB821137.1|	0.059	99.941	100	168755	168855
Staphylococcus_#_aureus_!_M0240_{_genomic_}_scaffold_acqwO-supercont1.11_whole_genome_shotgun_sequence|gi|487374136|ref|NZ_KB821145.1|	0.014	99.986	100	697619	697719
Staphylococcus_#_aureus_!_M0240_{_genomic_}_scaffold_acqwO-supercont1.8_whole_genome_shotgun_sequence|gi|487374573|ref|NZ_KB821152.1|	0.059	99.941	100	170624	170724
Staphylococcus_#_aureus_!_M0252_{_genomic_}_scaffold_acqxE-supercont1.1_whole_genome_shotgun_sequence|gi|486266332|ref|NZ_KB821139.1|	0.004	99.996	100	2772588	2772688
Staphylococcus_#_aureus_!_M0270_{_genomic_}_scaffold_acrGX-supercont1.2_whole_genome_shotgun_sequence|gi|487374876|ref|NZ_KB821159.1|	0.017	99.983	100	600744	600844
Staphylococcus_#_aureus_!_M0280_{_genomic_}_scaffold_acunT-supercont1.5_whole_genome_shotgun_sequence|gi|487362514|ref|NZ_KB821185.1|	0.039	99.961	100	254618	254718
Staphylococcus_#_aureus_!_M0288_{_genomic_}_scaffold_acqwg-supercont1.6_whole_genome_shotgun_sequence|gi|487376465|ref|NZ_KB821195.1|	0.047	99.953	100	214687	214787
Staphylococcus_#_aureus_!_M0294_{_genomic_}_scaffold_acumG-supercont1.1_whole_genome_shotgun_sequence|gi|487400027|ref|NZ_KB822352.1|	0.007	99.993	100	1377094	1377194
Staphylococcus_#_aureus_!_M0294_{_genomic_}_scaffold_acumG-supercont1.3_whole_genome_shotgun_sequence|gi|487400069|ref|NZ_KB822355.1|	5.974	94.026	100	1574	1674
Staphylococcus_#_aureus_!_M0294_{_genomic_}_scaffold_acumG-supercont1.4_whole_genome_shotgun_sequence|gi|487400083|ref|NZ_KB822356.1|	6.068	93.932	100	1548	1648
Staphylococcus_#_aureus_!_M0294_{_genomic_}_scaffold_acumG-supercont1.8_whole_genome_shotgun_sequence|gi|487400169|ref|NZ_KB822360.1|	0.034	99.966	100	298210	298310
Staphylococcus_#_aureus_!_M0326_{_genomic_}_scaffold_acrHf-supercont1.4_whole_genome_shotgun_sequence|gi|486268858|ref|NZ_KB821205.1|	0.108	99.892	100	92906	93006
Staphylococcus_#_aureus_!_M0329_{_genomic_}_scaffold_acrHa-supercont1.1_whole_genome_shotgun_sequence|gi|486273423|ref|NZ_KB821224.1|	0.032	99.968	100	316022	316122
Staphylococcus_#_aureus_!_M0329_{_genomic_}_scaffold_acrHa-supercont1.9_whole_genome_shotgun_sequence|gi|486276662|ref|NZ_KB821233.1|	0.014	99.986	100	739117	739217
Staphylococcus_#_aureus_!_M0351_{_genomic_}_scaffold_acunV-supercont1.3_whole_genome_shotgun_sequence|gi|487364343|ref|NZ_KB821257.1|	0.02	99.98	100	492349	492449
Staphylococcus_#_aureus_!_M0351_{_genomic_}_scaffold_acunV-supercont1.8_whole_genome_shotgun_sequence|gi|487364530|ref|NZ_KB821262.1|	0.011	99.989	100	908669	908769
Staphylococcus_#_aureus_!_M0374_{_genomic_}_scaffold_aculK-supercont1.3_whole_genome_shotgun_sequence|gi|487365551|ref|NZ_KB821280.1|	0.006	99.994	100	1591551	1591651
Staphylococcus_#_aureus_!_M0375_{_genomic_}_scaffold_acunY-supercont1.1_whole_genome_shotgun_sequence|gi|487365727|ref|NZ_KB821282.1|	0.009	99.991	100	1123698	1123798
Staphylococcus_#_aureus_!_M0404_{_genomic_}_scaffold_acrGQ-supercont1.2_whole_genome_shotgun_sequence|gi|487378643|ref|NZ_KB821303.1|	0.061	99.939	100	163332	163432
Staphylococcus_#_aureus_!_M0404_{_genomic_}_scaffold_acrGQ-supercont1.3_whole_genome_shotgun_sequence|gi|487378650|ref|NZ_KB821304.1|	0.225	99.775	100	44428	44528
Staphylococcus_#_aureus_!_M0408_{_genomic_}_scaffold_acrHk-supercont1.5_whole_genome_shotgun_sequence|gi|486296934|ref|NZ_KB821330.1|	0.369	99.631	100	27031	27131
Staphylococcus_#_aureus_!_M0415_{_genomic_}_scaffold_acrGP-supercont1.6_whole_genome_shotgun_sequence|gi|487379309|ref|NZ_KB821322.1|	0.029	99.971	100	349037	349137
Staphylococcus_#_aureus_!_M0478_{_genomic_}_scaffold_acrGZ-supercont1.4_whole_genome_shotgun_sequence|gi|486312219|ref|NZ_KB821379.1|	0.016	99.984	100	608149	608249
Staphylococcus_#_aureus_!_M0478_{_genomic_}_scaffold_acrGZ-supercont1.7_whole_genome_shotgun_sequence|gi|486313431|ref|NZ_KB821382.1|	0.013	99.987	100	782463	782563
Staphylococcus_#_aureus_!_M0489_{_genomic_}_scaffold_acsPG-supercont1.11_whole_genome_shotgun_sequence|gi|486314901|ref|NZ_KB821387.1|	0.014	99.986	100	729594	729694
Staphylococcus_#_aureus_!_M0493_{_genomic_}_scaffold_acqwN-supercont1.2_whole_genome_shotgun_sequence|gi|487380256|ref|NZ_KB821402.1|	0.007	99.993	100	1401411	1401511
Staphylococcus_#_aureus_!_M0510_{_genomic_}_scaffold_acumF-supercont1.4_whole_genome_shotgun_sequence|gi|487369183|ref|NZ_KB821410.1|	0.006	99.994	100	1589359	1589459
Staphylococcus_#_aureus_!_M0528_{_genomic_}_scaffold_acvqo-supercont1.1_whole_genome_shotgun_sequence|gi|486334820|ref|NZ_KB821414.1|	0.031	99.969	100	318659	318759
Staphylococcus_#_aureus_!_M0539_{_genomic_}_scaffold_acvqn-supercont1.12_whole_genome_shotgun_sequence|gi|486347810|ref|NZ_KB821453.1|	0.034	99.966	100	298303	298403
Staphylococcus_#_aureus_!_M0539_{_genomic_}_scaffold_acvqn-supercont1.5_whole_genome_shotgun_sequence|gi|486349175|ref|NZ_KB821461.1|	0.029	99.971	100	345835	345935
Staphylococcus_#_aureus_!_M0562_{_genomic_}_scaffold_acumS-supercont1.1_whole_genome_shotgun_sequence|gi|487370065|ref|NZ_KB821470.1|	0.011	99.989	100	890715	890815
Staphylococcus_#_aureus_!_M0565_{_genomic_}_scaffold_acvqE-supercont1.1_whole_genome_shotgun_sequence|gi|486353655|ref|NZ_KB821479.1|	0.02	99.98	100	495224	495324
Staphylococcus_#_aureus_!_M0565_{_genomic_}_scaffold_acvqE-supercont1.2_whole_genome_shotgun_sequence|gi|486353966|ref|NZ_KB821480.1|	0.027	99.973	100	366000	366100
Staphylococcus_#_aureus_!_M0602_{_genomic_}_scaffold_acvqp-supercont1.5_whole_genome_shotgun_sequence|gi|486359730|ref|NZ_KB821497.1|	0.044	99.956	100	227613	227713
Staphylococcus_#_aureus_!_M0622_{_genomic_}_scaffold_acvqA-supercont1.1_whole_genome_shotgun_sequence|gi|486361087|ref|NZ_KB821502.1|	0.02	99.98	100	497768	497868
Staphylococcus_#_aureus_!_M0648_{_genomic_}_scaffold_acunl-supercont1.4_whole_genome_shotgun_sequence|gi|487381120|ref|NZ_KB821525.1|	0.017	99.983	100	591015	591115
Staphylococcus_#_aureus_!_M0648_{_genomic_}_scaffold_acunl-supercont1.5_whole_genome_shotgun_sequence|gi|487381151|ref|NZ_KB821526.1|	0.041	99.959	100	246251	246351
Staphylococcus_#_aureus_!_M0648_{_genomic_}_scaffold_acunl-supercont1.7_whole_genome_shotgun_sequence|gi|487381226|ref|NZ_KB821528.1|	0.034	99.966	100	293573	293673
Staphylococcus_#_aureus_!_M0648_{_genomic_}_scaffold_acunl-supercont1.9_whole_genome_shotgun_sequence|gi|487381266|ref|NZ_KB821530.1|	0.158	99.842	100	63320	63420
Staphylococcus_#_aureus_!_M0660_{_genomic_}_scaffold_acumg-supercont1.1_whole_genome_shotgun_sequence|gi|487381360|ref|NZ_KB821531.1|	0.012	99.988	100	859803	859903
Staphylococcus_#_aureus_!_M0660_{_genomic_}_scaffold_acumg-supercont1.9_whole_genome_shotgun_sequence|gi|487381619|ref|NZ_KB821545.1|	0.043	99.957	100	233108	233208
Staphylococcus_#_aureus_!_M0673_{_genomic_}_scaffold_acumv-supercont1.2_whole_genome_shotgun_sequence|gi|487382376|ref|NZ_KB821563.1|	0.012	99.988	100	843352	843452
Staphylococcus_#_aureus_!_M0673_{_genomic_}_scaffold_acumv-supercont1.9_whole_genome_shotgun_sequence|gi|487382728|ref|NZ_KB821570.1|	0.016	99.984	100	632482	632582
Staphylococcus_#_aureus_!_M0676_{_genomic_}_scaffold_acvqP-supercont1.2_whole_genome_shotgun_sequence|gi|486363747|ref|NZ_KB821572.1|	0.015	99.985	100	653491	653591
Staphylococcus_#_aureus_!_M0692_{_genomic_}_scaffold_acvqM-supercont1.3_whole_genome_shotgun_sequence|gi|486368617|ref|NZ_KB821589.1|	0.037	99.963	100	271017	271117
Staphylococcus_#_aureus_!_M0695_{_genomic_}_scaffold_acunx-supercont1.13_whole_genome_shotgun_sequence|gi|489044944|ref|NZ_KB821600.1|	3.029	96.971	100	3201	3301
Staphylococcus_#_aureus_!_M0719_{_genomic_}_scaffold_acvrc-supercont1.1_whole_genome_shotgun_sequence|gi|480443880|ref|NZ_KB821615.1|	0.01	99.99	100	976129	976229
Staphylococcus_#_aureus_!_M0719_{_genomic_}_scaffold_acvrc-supercont1.3_whole_genome_shotgun_sequence|gi|480444771|ref|NZ_KB821618.1|	0.037	99.963	100	268196	268296
Staphylococcus_#_aureus_!_M0769_{_genomic_}_scaffold_acvqF-supercont1.1_whole_genome_shotgun_sequence|gi|480446662|ref|NZ_KB821625.1|	0.02	99.98	100	492997	493097
Staphylococcus_#_aureus_!_M0780_{_genomic_}_scaffold_acvqm-supercont1.2_whole_genome_shotgun_sequence|gi|486375972|ref|NZ_KB821663.1|	0.029	99.971	100	342412	342512
Staphylococcus_#_aureus_!_M0780_{_genomic_}_scaffold_acvqm-supercont1.6_whole_genome_shotgun_sequence|gi|486377135|ref|NZ_KB821667.1|	0.011	99.989	100	913543	913643
Staphylococcus_#_aureus_!_M0799_{_genomic_}_scaffold_acvqq-supercont1.1_whole_genome_shotgun_sequence|gi|486378646|ref|NZ_KB821650.1|	0.009	99.991	100	1081402	1081502
Staphylococcus_#_aureus_!_M0799_{_genomic_}_scaffold_acvqq-supercont1.5_whole_genome_shotgun_sequence|gi|486379833|ref|NZ_KB821657.1|	0.016	99.984	100	609319	609419
Staphylococcus_#_aureus_!_M0822_{_genomic_}_scaffold_acunB-supercont1.4_whole_genome_shotgun_sequence|gi|487383672|ref|NZ_KB821683.1|	0.043	99.957	100	233632	233732
Staphylococcus_#_aureus_!_M0823_{_genomic_}_scaffold_acvqk-supercont1.3_whole_genome_shotgun_sequence|gi|486382297|ref|NZ_KB821693.1|	0.029	99.971	100	347201	347301
Staphylococcus_#_aureus_!_M0877_{_genomic_}_scaffold_acumt-supercont1.1_whole_genome_shotgun_sequence|gi|487384875|ref|NZ_KB821714.1|	0.228	99.772	100	43758	43858
Staphylococcus_#_aureus_!_M0892_{_genomic_}_scaffold_aculW-supercont1.5_whole_genome_shotgun_sequence|gi|487385784|ref|NZ_KB821734.1|	0.014	99.986	100	735259	735359
Staphylococcus_#_aureus_!_M0900_{_genomic_}_scaffold_acunz-supercont1.2_whole_genome_shotgun_sequence|gi|487386116|ref|NZ_KB821740.1|	0.026	99.974	100	382948	383048
Staphylococcus_#_aureus_!_M0900_{_genomic_}_scaffold_acunz-supercont1.5_whole_genome_shotgun_sequence|gi|487386253|ref|NZ_KB821743.1|	0.017	99.983	100	597881	597981
Staphylococcus_#_aureus_!_M0927_{_genomic_}_scaffold_aculU-supercont1.11_whole_genome_shotgun_sequence|gi|487387049|ref|NZ_KB821750.1|	0.016	99.984	100	631454	631554
Staphylococcus_#_aureus_!_M0927_{_genomic_}_scaffold_aculU-supercont1.3_whole_genome_shotgun_sequence|gi|487387237|ref|NZ_KB821753.1|	0.029	99.971	100	343417	343517
Staphylococcus_#_aureus_!_M0946_{_genomic_}_scaffold_acunJ-supercont1.1_whole_genome_shotgun_sequence|gi|487387792|ref|NZ_KB821785.1|	0.246	99.754	100	40595	40695
Staphylococcus_#_aureus_!_M0964_{_genomic_}_scaffold_aculV-supercont1.2_whole_genome_shotgun_sequence|gi|487388415|ref|NZ_KB821802.1|	0.022	99.978	100	444379	444479
Staphylococcus_#_aureus_!_M0964_{_genomic_}_scaffold_aculV-supercont1.6_whole_genome_shotgun_sequence|gi|487389654|ref|NZ_KB821806.1|	0.021	99.979	100	482863	482963
Staphylococcus_#_aureus_!_M0978_{_genomic_}_scaffold_acunG-supercont1.2_whole_genome_shotgun_sequence|gi|487389916|ref|NZ_KB821772.1|	0.222	99.778	100	44940	45040
Staphylococcus_#_aureus_!_M0978_{_genomic_}_scaffold_acunG-supercont1.3_whole_genome_shotgun_sequence|gi|487389994|ref|NZ_KB821773.1|	0.029	99.971	100	349162	349262
Staphylococcus_#_aureus_!_M0978_{_genomic_}_scaffold_acunG-supercont1.6_whole_genome_shotgun_sequence|gi|487390132|ref|NZ_KB821776.1|	0.041	99.959	100	241586	241686
Staphylococcus_#_aureus_!_M1010_{_genomic_}_scaffold_acvqt-supercont1.4_whole_genome_shotgun_sequence|gi|486403291|ref|NZ_KB821827.1|	0.009	99.991	100	1117414	1117514
Staphylococcus_#_aureus_!_M1015_{_genomic_}_scaffold_acvqH-supercont1.2_whole_genome_shotgun_sequence|gi|486403896|ref|NZ_KB821835.1|	0.031	99.969	100	323334	323434
Staphylococcus_#_aureus_!_M1015_{_genomic_}_scaffold_acvqH-supercont1.7_whole_genome_shotgun_sequence|gi|486405285|ref|NZ_KB821840.1|	0.016	99.984	100	618449	618549
Staphylococcus_#_aureus_!_M1034_{_genomic_}_scaffold_acumn-supercont1.12_whole_genome_shotgun_sequence|gi|487391302|ref|NZ_KB821851.1|	5.192	94.808	100	1826	1926
Staphylococcus_#_aureus_!_M1034_{_genomic_}_scaffold_acumn-supercont1.4_whole_genome_shotgun_sequence|gi|487391471|ref|NZ_KB821855.1|	0.128	99.872	100	77871	77971
Staphylococcus_#_aureus_!_M1036_{_genomic_}_scaffold_acvqI-supercont1.9_whole_genome_shotgun_sequence|gi|486409401|ref|NZ_KB821870.1|	0.01	99.99	100	1011081	1011181
Staphylococcus_#_aureus_!_M1037_{_genomic_}_scaffold_acvqz-supercont1.1_whole_genome_shotgun_sequence|gi|486409656|ref|NZ_KB821920.1|	0.02	99.98	100	495720	495820
Staphylococcus_#_aureus_!_M1037_{_genomic_}_scaffold_acvqz-supercont1.6_whole_genome_shotgun_sequence|gi|486411563|ref|NZ_KB821925.1|	0.011	99.989	100	917895	917995
Staphylococcus_#_aureus_!_M1044_{_genomic_}_scaffold_acumE-supercont1.11_whole_genome_shotgun_sequence|gi|487392161|ref|NZ_KB821873.1|	0.016	99.984	100	628539	628639
Staphylococcus_#_aureus_!_M1044_{_genomic_}_scaffold_acumE-supercont1.2_whole_genome_shotgun_sequence|gi|487392452|ref|NZ_KB821882.1|	0.043	99.957	100	232696	232796
Staphylococcus_#_aureus_!_M1044_{_genomic_}_scaffold_acumE-supercont1.3_whole_genome_shotgun_sequence|gi|487392496|ref|NZ_KB821883.1|	0.231	99.769	100	43147	43247
Staphylococcus_#_aureus_!_M1044_{_genomic_}_scaffold_acumE-supercont1.7_whole_genome_shotgun_sequence|gi|487392928|ref|NZ_KB821887.1|	0.034	99.966	100	297530	297630
Staphylococcus_#_aureus_!_M1062_{_genomic_}_scaffold_aculY-supercont1.2_whole_genome_shotgun_sequence|gi|487394108|ref|NZ_KB821913.1|	0.029	99.971	100	342232	342332
Staphylococcus_#_aureus_!_M1063_{_genomic_}_scaffold_acumZ-supercont1.10_whole_genome_shotgun_sequence|gi|486415432|ref|NZ_KB821902.1|	0.097	99.903	100	103441	103541
Staphylococcus_#_aureus_!_M1063_{_genomic_}_scaffold_acumZ-supercont1.4_whole_genome_shotgun_sequence|gi|486416208|ref|NZ_KB821906.1|	0.006	99.994	100	1645962	1646062
Staphylococcus_#_aureus_!_M1064_{_genomic_}_scaffold_acumU-supercont1.2_whole_genome_shotgun_sequence|gi|486419606|ref|NZ_KB821938.1|	4.297	95.703	100	2227	2327
Staphylococcus_#_aureus_!_M1068_{_genomic_}_scaffold_acunM-supercont1.4_whole_genome_shotgun_sequence|gi|487394500|ref|NZ_KB821930.1|	0.038	99.962	100	261342	261442
Staphylococcus_#_aureus_!_M1083_{_genomic_}_scaffold_acumj-supercont1.2_whole_genome_shotgun_sequence|gi|487394735|ref|NZ_KB821968.1|	0.018	99.982	100	568992	569092
Staphylococcus_#_aureus_!_M1083_{_genomic_}_scaffold_acumj-supercont1.6_whole_genome_shotgun_sequence|gi|487394925|ref|NZ_KB821972.1|	0.014	99.986	100	717333	717433
Staphylococcus_#_aureus_!_M1092_{_genomic_}_scaffold_acunK-supercont1.2_whole_genome_shotgun_sequence|gi|486422034|ref|NZ_KB821958.1|	0.228	99.772	100	43832	43932
Staphylococcus_#_aureus_!_M1093_{_genomic_}_scaffold_acumQ-supercont1.2_whole_genome_shotgun_sequence|gi|486423861|ref|NZ_KB821947.1|	0.018	99.982	100	543260	543360
Staphylococcus_#_aureus_!_M1103_{_genomic_}_scaffold_acump-supercont1.2_whole_genome_shotgun_sequence|gi|486428600|ref|NZ_KB822035.1|	6.274	93.726	100	1494	1594
Staphylococcus_#_aureus_!_M1103_{_genomic_}_scaffold_acump-supercont1.3_whole_genome_shotgun_sequence|gi|486428651|ref|NZ_KB822036.1|	6.394	93.606	100	1464	1564
Staphylococcus_#_aureus_!_M1109_{_genomic_}_scaffold_acunD-supercont1.10_whole_genome_shotgun_sequence|gi|487395159|ref|NZ_KB822008.1|	0.011	99.989	100	889058	889158
Staphylococcus_#_aureus_!_M1119_{_genomic_}_scaffold_acunS-supercont1.6_whole_genome_shotgun_sequence|gi|486431167|ref|NZ_KB822030.1|	0.044	99.956	100	227984	228084
Staphylococcus_#_aureus_!_M1119_{_genomic_}_scaffold_acunS-supercont1.9_whole_genome_shotgun_sequence|gi|486431412|ref|NZ_KB822033.1|	0.119	99.881	100	83878	83978
Staphylococcus_#_aureus_!_M1167_{_genomic_}_scaffold_acuns-supercont1.1_whole_genome_shotgun_sequence|gi|486431659|ref|NZ_KB822042.1|	0.02	99.98	100	493163	493263
Staphylococcus_#_aureus_!_M1167_{_genomic_}_scaffold_acuns-supercont1.5_whole_genome_shotgun_sequence|gi|486432337|ref|NZ_KB822046.1|	0.093	99.907	100	107982	108082
Staphylococcus_#_aureus_!_M1224_{_genomic_}_scaffold_acumM-supercont1.1_whole_genome_shotgun_sequence|gi|487396563|ref|NZ_KB822076.1|	0.022	99.978	100	447698	447798
Staphylococcus_#_aureus_!_M1224_{_genomic_}_scaffold_acumM-supercont1.9_whole_genome_shotgun_sequence|gi|487396822|ref|NZ_KB822085.1|	0.016	99.984	100	623559	623659
Staphylococcus_#_aureus_!_M1244_{_genomic_}_scaffold_acumu-supercont1.10_whole_genome_shotgun_sequence|gi|487396892|ref|NZ_KB822087.1|	0.033	99.967	100	303751	303851
Staphylococcus_#_aureus_!_M1244_{_genomic_}_scaffold_acumu-supercont1.7_whole_genome_shotgun_sequence|gi|487397133|ref|NZ_KB822096.1|	0.075	99.925	100	132390	132490
Staphylococcus_#_aureus_!_M1244_{_genomic_}_scaffold_acumu-supercont1.8_whole_genome_shotgun_sequence|gi|487397170|ref|NZ_KB822097.1|	0.021	99.979	100	486338	486438
Staphylococcus_#_aureus_!_M1248_{_genomic_}_scaffold_acunw-supercont1.2_whole_genome_shotgun_sequence|gi|486644648|ref|NZ_KB822100.1|	0.029	99.971	100	343064	343164
Staphylococcus_#_aureus_!_M1248_{_genomic_}_scaffold_acunw-supercont1.7_whole_genome_shotgun_sequence|gi|486655743|ref|NZ_KB822105.1|	0.013	99.987	100	799150	799250
Staphylococcus_#_aureus_!_M1255_{_genomic_}_scaffold_acunA-supercont1.2_whole_genome_shotgun_sequence|gi|486677808|ref|NZ_KB822117.1|	0.228	99.772	100	43795	43895
Staphylococcus_#_aureus_!_M1255_{_genomic_}_scaffold_acunA-supercont1.4_whole_genome_shotgun_sequence|gi|486687246|ref|NZ_KB822119.1|	0.043	99.957	100	231108	231208
Staphylococcus_#_aureus_!_M1255_{_genomic_}_scaffold_acunA-supercont1.7_whole_genome_shotgun_sequence|gi|486697825|ref|NZ_KB822122.1|	0.016	99.984	100	631047	631147
Staphylococcus_#_aureus_!_M1275_{_genomic_}_scaffold_acumX-supercont1.2_whole_genome_shotgun_sequence|gi|487397542|ref|NZ_KB822131.1|	0.023	99.977	100	444077	444177
Staphylococcus_#_aureus_!_M1277_{_genomic_}_scaffold_acung-supercont1.1_whole_genome_shotgun_sequence|gi|486739869|ref|NZ_KB822136.1|	0.026	99.974	100	379428	379528
Staphylococcus_#_aureus_!_M1277_{_genomic_}_scaffold_acung-supercont1.4_whole_genome_shotgun_sequence|gi|486766472|ref|NZ_KB822139.1|	0.013	99.987	100	796953	797053
Staphylococcus_#_aureus_!_M1286_{_genomic_}_scaffold_acuob-supercont1.1_whole_genome_shotgun_sequence|gi|487397870|ref|NZ_KB822141.1|	0.02	99.98	100	494864	494964
Staphylococcus_#_aureus_!_M1309_{_genomic_}_scaffold_acunC-supercont1.5_whole_genome_shotgun_sequence|gi|487398450|ref|NZ_KB822160.1|	0.059	99.941	100	169565	169665
Staphylococcus_#_aureus_!_M1321_{_genomic_}_scaffold_acunh-supercont1.2_whole_genome_shotgun_sequence|gi|486904299|ref|NZ_KB822192.1|	0.024	99.976	100	418831	418931
Staphylococcus_#_aureus_!_M1321_{_genomic_}_scaffold_acunh-supercont1.3_whole_genome_shotgun_sequence|gi|486908664|ref|NZ_KB822193.1|	0.246	99.754	100	40535	40635
Staphylococcus_#_aureus_!_M1321_{_genomic_}_scaffold_acunh-supercont1.7_whole_genome_shotgun_sequence|gi|486929038|ref|NZ_KB822197.1|	0.145	99.855	100	68939	69039
Staphylococcus_#_aureus_!_M1373_{_genomic_}_scaffold_acumD-supercont1.1_whole_genome_shotgun_sequence|gi|487047268|ref|NZ_KB822210.1|	0.009	99.991	100	1066749	1066849
Staphylococcus_#_aureus_!_M1374_{_genomic_}_scaffold_acumR-supercont1.4_whole_genome_shotgun_sequence|gi|487398652|ref|NZ_KB822222.1|	0.039	99.961	100	254597	254697
Staphylococcus_#_aureus_!_M1374_{_genomic_}_scaffold_acumR-supercont1.7_whole_genome_shotgun_sequence|gi|487398699|ref|NZ_KB822225.1|	0.076	99.924	100	130991	131091
Staphylococcus_#_aureus_!_M1374_{_genomic_}_scaffold_acumR-supercont1.9_whole_genome_shotgun_sequence|gi|487398752|ref|NZ_KB822227.1|	0.016	99.984	100	627613	627713
Staphylococcus_#_aureus_!_M1463_{_genomic_}_scaffold_acums-supercont1.2_whole_genome_shotgun_sequence|gi|487135933|ref|NZ_KB822557.1|	0.029	99.971	100	343382	343482
Staphylococcus_#_aureus_!_M1463_{_genomic_}_scaffold_acums-supercont1.9_whole_genome_shotgun_sequence|gi|487136422|ref|NZ_KB822564.1|	0.012	99.988	100	855351	855451
Staphylococcus_#_aureus_!_M1510_{_genomic_}_scaffold_aculM-supercont1.3_whole_genome_shotgun_sequence|gi|487399529|ref|NZ_KB822259.1|	0.043	99.957	100	233651	233751
Staphylococcus_#_aureus_!_M1533_{_genomic_}_scaffold_aculS-supercont1.3_whole_genome_shotgun_sequence|gi|487138274|ref|NZ_KB822287.1|	0.057	99.943	100	175007	175107
Staphylococcus_#_aureus_!_M1533_{_genomic_}_scaffold_aculS-supercont1.4_whole_genome_shotgun_sequence|gi|487138312|ref|NZ_KB822288.1|	0.085	99.915	100	117407	117507
Staphylococcus_#_aureus_!_M1533_{_genomic_}_scaffold_aculS-supercont1.5_whole_genome_shotgun_sequence|gi|487138449|ref|NZ_KB822289.1|	0.009	99.991	100	1074975	1075075
Staphylococcus_#_aureus_!_M1563_{_genomic_}_scaffold_acuoe-supercont1.2_whole_genome_shotgun_sequence|gi|487146809|ref|NZ_KB822305.1|	0.235	99.765	100	42376	42476
Staphylococcus_#_aureus_!_M1563_{_genomic_}_scaffold_acuoe-supercont1.4_whole_genome_shotgun_sequence|gi|487160870|ref|NZ_KB822307.1|	0.066	99.934	100	152089	152189
Staphylococcus_#_aureus_!_M1563_{_genomic_}_scaffold_acuoe-supercont1.6_whole_genome_shotgun_sequence|gi|487166501|ref|NZ_KB822309.1|	0.023	99.977	100	438485	438585
Staphylococcus_#_aureus_!_plasmid_{_SAP015A_}_complete_sequence|gi|410108933|ref|NC_013289.1|	0.369	99.631	100	26968	27068
Staphylococcus_#_aureus_!_plasmid_{_SAP027A_}_complete_sequence|gi|260667403|ref|NC_013324.1|	0.337	99.663	100	29546	29646
Staphylococcus_#_aureus_!_plasmid_{_SAP046A_}_complete_sequence|gi|410108938|ref|NC_013294.1|	0.369	99.631	100	26968	27068
Staphylococcus_#_aureus_!_plasmid_{_SAP049A_}_complete_sequence|gi|410108940|ref|NC_013296.1|	0.4	99.6	100	24922	25022
Staphylococcus_#_aureus_!_plasmid_{_SAP050A_}_complete_sequence|gi|410108942|ref|NC_013298.1|	0.369	99.631	100	26967	27067
Staphylococcus_#_aureus_!_plasmid_{_SAP051A_}_complete_sequence|gi|410108943|ref|NC_013299.1|	0.434	99.566	100	22959	23059
Staphylococcus_#_aureus_!_plasmid_{_p18805-P03_}_complete_sequence|gi|410655546|ref|NC_019150.1|	0.369	99.631	100	26969	27069
Staphylococcus_#_aureus_!_plasmid_{_p18806-P03_}_complete_sequence|gi|410655117|ref|NC_018956.1|	0.369	99.631	100	26968	27068
Staphylococcus_#_aureus_!_plasmid_{_p18807-P03_}_complete_sequence|gi|410655154|ref|NC_018957.1|	0.371	99.629	100	26872	26972
Staphylococcus_#_aureus_!_plasmid_{_p18808-P03_}_complete_sequence|gi|410655199|ref|NC_018959.1|	0.37	99.63	100	26959	27059
Staphylococcus_#_aureus_!_plasmid_{_p18809-P03_}_complete_sequence|gi|410655245|ref|NC_018961.1|	0.369	99.631	100	26968	27068
Staphylococcus_#_aureus_!_plasmid_{_p18809-P04_}_complete_sequence|gi|410655376|ref|NC_018968.1|	0.352	99.648	100	28304	28404
Staphylococcus_#_aureus_!_plasmid_{_p18810-P03_}_complete_sequence|gi|410655288|ref|NC_018963.1|	0.369	99.631	100	26967	27067
Staphylococcus_#_aureus_!_plasmid_{_p18811-P03_}_complete_sequence|gi|410655465|ref|NC_018974.1|	0.369	99.631	100	26970	27070
Staphylococcus_#_aureus_!_plasmid_{_pLAC-P03_}_complete_sequence|gi|410655421|ref|NC_018970.1|	0.369	99.631	100	26968	27068
Staphylococcus_#_aureus_!_plasmid_{_pSK156_}_complete_sequence|gi|260667570|ref|NC_013348.1|	0.222	99.778	100	44952	45052
Staphylococcus_#_aureus_!_subsp._{_aureus_}_55/2053_genomic_scaffold_supercont1.10_whole_genome_shotgun_sequence|gi|257426087|ref|NZ_GG700542.1|	2.522	97.478	100	3865	3965
Staphylococcus_#_aureus_!_subsp._{_aureus_}_55/2053_genomic_scaffold_supercont1.2_whole_genome_shotgun_sequence|gi|257424591|ref|NZ_GG700534.1|	0.258	99.742	100	38703	38803
Staphylococcus_#_aureus_!_subsp._{_aureus_}_58-424_genomic_scaffold_supercont1.5_whole_genome_shotgun_sequence|gi|293500356|ref|NZ_GG749058.1|	0.254	99.746	100	39235	39335
Staphylococcus_#_aureus_!_subsp._{_aureus_}_65-1322_genomic_scaffold_supercont1.3_whole_genome_shotgun_sequence|gi|257427257|ref|NZ_GG700561.1|	0.258	99.742	100	38733	38833
Staphylococcus_#_aureus_!_subsp._{_aureus_}_68-397_genomic_scaffold_supercont1.2_whole_genome_shotgun_sequence|gi|257429893|ref|NZ_GG700575.1|	0.258	99.742	100	38733	38833
Staphylococcus_#_aureus_!_subsp._{_aureus_}_68-397_genomic_scaffold_supercont1.9_whole_genome_shotgun_sequence|gi|257431025|ref|NZ_GG700582.1|	0.193	99.807	100	51824	51924
Staphylococcus_#_aureus_!_subsp._{_aureus_}_A017934/97_genomic_scaffold_supercont1.2_whole_genome_shotgun_sequence|gi|283957268|ref|NZ_GG731496.1|	0.254	99.746	100	39208	39308
Staphylococcus_#_aureus_!_subsp._{_aureus_}_Btn1260_genomic_scaffold_supercont1.2_whole_genome_shotgun_sequence|gi|282904855|ref|NZ_GG730257.1|	0.254	99.746	100	39206	39306
Staphylococcus_#_aureus_!_subsp._{_aureus_}_C101_genomic_scaffold_supercont1.10_whole_genome_shotgun_sequence|gi|282924477|ref|NZ_GG730129.1|	1.235	98.765	100	7996	8096
Staphylococcus_#_aureus_!_subsp._{_aureus_}_C101_genomic_scaffold_supercont1.3_whole_genome_shotgun_sequence|gi|282923011|ref|NZ_GG730122.1|	0.257	99.743	100	38755	38855
Staphylococcus_#_aureus_!_subsp._{_aureus_}_C160_genomic_scaffold_supercont1.3_whole_genome_shotgun_sequence|gi|282903064|ref|NZ_GG730275.1|	0.254	99.746	100	39253	39353
Staphylococcus_#_aureus_!_subsp._{_aureus_}_C427_genomic_scaffold_supercont1.2_whole_genome_shotgun_sequence|gi|282918168|ref|NZ_GG730142.1|	0.107	99.893	100	93462	93562
Staphylococcus_#_aureus_!_subsp._{_aureus_}_C427_genomic_scaffold_supercont1.3_whole_genome_shotgun_sequence|gi|282918260|ref|NZ_GG730143.1|	0.258	99.742	100	38719	38819
Staphylococcus_#_aureus_!_subsp._{_aureus_}_C427_genomic_scaffold_supercont1.7_whole_genome_shotgun_sequence|gi|282918688|ref|NZ_GG730147.1|	1.982	98.018	100	4946	5046
Staphylococcus_#_aureus_!_subsp._{_aureus_}_CM05_genomic_scaffold_Scfld20_whole_genome_shotgun_sequence|gi|424768002|ref|NZ_JH806482.1|	0.105	99.895	100	95215	95315
Staphylococcus_#_aureus_!_subsp._{_aureus_}_CM05_genomic_scaffold_Scfld22_whole_genome_shotgun_sequence|gi|424768319|ref|NZ_JH806484.1|	0.264	99.736	100	37746	37846
Staphylococcus_#_aureus_!_subsp._{_aureus_}_CM05_genomic_scaffold_Scfld360_whole_genome_shotgun_sequence|gi|424774845|ref|NZ_JH806554.1|	0.242	99.758	100	41296	41396
Staphylococcus_#_aureus_!_subsp._{_aureus_}_CM05_genomic_scaffold_Scfld5_whole_genome_shotgun_sequence|gi|424767329|ref|NZ_JH806472.1|	0.287	99.713	100	34700	34800
Staphylococcus_#_aureus_!_subsp._{_aureus_}_CM05_genomic_scaffold_Scfld74_whole_genome_shotgun_sequence|gi|424769499|ref|NZ_JH806498.1|	0.076	99.924	100	132014	132114
Staphylococcus_#_aureus_!_subsp._{_aureus_}_CM05_genomic_scaffold_Scfld76_whole_genome_shotgun_sequence|gi|424769753|ref|NZ_JH806499.1|	0.251	99.749	100	39810	39910
Staphylococcus_#_aureus_!_subsp._{_aureus_}_CM05_genomic_scaffold_Scfld79_whole_genome_shotgun_sequence|gi|424770151|ref|NZ_JH806502.1|	0.378	99.622	100	26352	26452
Staphylococcus_#_aureus_!_subsp._{_aureus_}_CM05_genomic_scaffold_Scfld98_whole_genome_shotgun_sequence|gi|424770915|ref|NZ_JH806511.1|	0.505	99.495	100	19719	19819
Staphylococcus_#_aureus_!_subsp._{_aureus_}_D139_genomic_scaffold_supercont1.24_whole_genome_shotgun_sequence|gi|282917649|ref|NZ_GG730182.1|	0.145	99.855	100	68796	68896
Staphylococcus_#_aureus_!_subsp._{_aureus_}_D139_genomic_scaffold_supercont1.7_whole_genome_shotgun_sequence|gi|282915797|ref|NZ_GG730165.1|	0.257	99.743	100	38759	38859
Staphylococcus_#_aureus_!_subsp._{_aureus_}_E1410_genomic_scaffold_supercont1.3_whole_genome_shotgun_sequence|gi|257432596|ref|NZ_GG700599.1|	0.258	99.742	100	38698	38798
Staphylococcus_#_aureus_!_subsp._{_aureus_}_EMRSA16_genomic_scaffold_supercont1.5_whole_genome_shotgun_sequence|gi|295427014|ref|NZ_GG770517.1|	0.254	99.746	100	39212	39312
Staphylococcus_#_aureus_!_subsp._{_aureus_}_EMRSA16_genomic_scaffold_supercont1.8_whole_genome_shotgun_sequence|gi|295427453|ref|NZ_GG770520.1|	0.34	99.66	100	29277	29377
Staphylococcus_#_aureus_!_subsp._{_aureus_}_H19_genomic_scaffold_supercont1.4_whole_genome_shotgun_sequence|gi|283768915|ref|NZ_GG730338.1|	0.257	99.743	100	38759	38859
Staphylococcus_#_aureus_!_subsp._{_aureus_}_M1015_genomic_scaffold_supercont1.1_whole_genome_shotgun_sequence|gi|293515882|ref|NZ_GG748996.1|	0.258	99.742	100	38733	38833
Staphylococcus_#_aureus_!_subsp._{_aureus_}_M1015_genomic_scaffold_supercont1.8_whole_genome_shotgun_sequence|gi|293528862|ref|NZ_GG749003.1|	2.296	97.704	100	4256	4356
Staphylococcus_#_aureus_!_subsp._{_aureus_}_M809_genomic_scaffold_supercont1.17_whole_genome_shotgun_sequence|gi|293510751|ref|NZ_GG749315.1|	0.267	99.733	100	37285	37385
Staphylococcus_#_aureus_!_subsp._{_aureus_}_M809_genomic_scaffold_supercont1.3_whole_genome_shotgun_sequence|gi|293509294|ref|NZ_GG749301.1|	0.262	99.738	100	38011	38111
Staphylococcus_#_aureus_!_subsp._{_aureus_}_M876_genomic_scaffold_supercont1.3_whole_genome_shotgun_sequence|gi|257435501|ref|NZ_GG700616.1|	0.258	99.742	100	38701	38801
Staphylococcus_#_aureus_!_subsp._{_aureus_}_M899_genomic_scaffold_supercont1.3_whole_genome_shotgun_sequence|gi|282913306|ref|NZ_GG730192.1|	0.257	99.743	100	38737	38837
Staphylococcus_#_aureus_!_subsp._{_aureus_}_MRSA131_genomic_scaffold_Scfld187_whole_genome_shotgun_sequence|gi|422746847|ref|NZ_GL638184.1|	0.57	99.43	100	17429	17529
Staphylococcus_#_aureus_!_subsp._{_aureus_}_MRSA131_genomic_scaffold_Scfld221_whole_genome_shotgun_sequence|gi|422746898|ref|NZ_GL638188.1|	0.625	99.375	100	15889	15989
Staphylococcus_#_aureus_!_subsp._{_aureus_}_MRSA131_genomic_scaffold_Scfld233_whole_genome_shotgun_sequence|gi|422747108|ref|NZ_GL638190.1|	0.727	99.273	100	13658	13758
Staphylococcus_#_aureus_!_subsp._{_aureus_}_MRSA131_genomic_scaffold_Scfld323_whole_genome_shotgun_sequence|gi|422747215|ref|NZ_GL638194.1|	1.867	98.133	100	5255	5355
Staphylococcus_#_aureus_!_subsp._{_aureus_}_MRSA131_genomic_scaffold_Scfld382_whole_genome_shotgun_sequence|gi|422747220|ref|NZ_GL638195.1|	0.486	99.514	100	20473	20573
Staphylococcus_#_aureus_!_subsp._{_aureus_}_MRSA131_genomic_scaffold_Scfld94_whole_genome_shotgun_sequence|gi|422745882|ref|NZ_GL638176.1|	0.634	99.366	100	15661	15761
Staphylococcus_#_aureus_!_subsp._{_aureus_}_MRSA177_genomic_scaffold_Scfld212_whole_genome_shotgun_sequence|gi|422743864|ref|NZ_GL638227.1|	0.567	99.433	100	17551	17651
Staphylococcus_#_aureus_!_subsp._{_aureus_}_MRSA177_genomic_scaffold_Scfld315_whole_genome_shotgun_sequence|gi|422744035|ref|NZ_GL638232.1|	0.392	99.608	100	25441	25541
Staphylococcus_#_aureus_!_subsp._{_aureus_}_MRSA177_genomic_scaffold_Scfld390_whole_genome_shotgun_sequence|gi|422744496|ref|NZ_GL638238.1|	0.334	99.666	100	29834	29934
Staphylococcus_#_aureus_!_subsp._{_aureus_}_Mu50_plasmid_VRSAp_complete_sequence|gi|14141823|ref|NC_002774.1|	0.398	99.602	100	25007	25107
Staphylococcus_#_aureus_!_subsp._{_aureus_}_ST228_plasmid_pI7S6_complete_sequence_isolate_18412|gi|472455798|ref|NC_020538.1|	0.421	99.579	100	23659	23759
Staphylococcus_#_aureus_!_subsp._{_aureus_}_ST228_plasmid_pI8T7_complete_sequence_isolate_18583|gi|469816323|ref|NC_020539.1|	0.421	99.579	100	23658	23758
Staphylococcus_#_aureus_!_subsp._{_aureus_}_ST398_plasmid_pS0385-1_complete_sequence|gi|387603991|ref|NC_017334.1|	1.906	98.094	100	5146	5246
Staphylococcus_#_aureus_!_subsp._{_aureus_}_TCH130_genomic_scaffold_SCAFFOLD18_whole_genome_shotgun_sequence|gi|255925780|ref|NZ_GG698175.1|	5.522	94.478	100	1711	1811
Staphylococcus_#_aureus_!_subsp._{_aureus_}_TCH130_genomic_scaffold_SCAFFOLD7_whole_genome_shotgun_sequence|gi|255925769|ref|NZ_GG698164.1|	0.179	99.821	100	55635	55735
Staphylococcus_#_aureus_!_subsp._{_aureus_}_USA300_TCH1516_plasmid_pUSA300HOUMR_complete_sequence|gi|161510924|ref|NC_010063.1|	0.37	99.63	100	26941	27041
Staphylococcus_#_aureus_!_subsp._{_aureus_}_USA300_TCH959_genomic_scaffold_SCAFFOLD15_whole_genome_shotgun_sequence|gi|255926331|ref|NZ_GG697999.1|	7.468	92.532	100	1239	1339
Staphylococcus_#_aureus_!_subsp._{_aureus_}_WBG10049_genomic_scaffold_supercont1.1_whole_genome_shotgun_sequence|gi|282910118|ref|NZ_GG730208.1|	0.258	99.742	100	38704	38804
Staphylococcus_#_aureus_!_subsp._{_aureus_}_WBG10049_genomic_scaffold_supercont1.9_whole_genome_shotgun_sequence|gi|282911729|ref|NZ_GG730216.1|	1.218	98.782	100	8108	8208
Staphylococcus_#_aureus_!_subsp._{_aureus_}_WW2703/97_genomic_scaffold_supercont1.12_whole_genome_shotgun_sequence|gi|282907998|ref|NZ_GG730231.1|	7.225	92.775	100	1284	1384
Staphylococcus_#_aureus_!_subsp._{_aureus_}_WW2703/97_genomic_scaffold_supercont1.23_whole_genome_shotgun_sequence|gi|282908628|ref|NZ_GG730242.1|	0.184	99.816	100	54324	54424
Staphylococcus_#_aureus_!_subsp._{_aureus_}_WW2703/97_genomic_scaffold_supercont1.6_whole_genome_shotgun_sequence|gi|282907805|ref|NZ_GG730225.1|	0.282	99.718	100	35390	35490
Staphylococcus_#_caprae_!_C87_{_genomic_}_scaffold_supercont1.2_whole_genome_shotgun_sequence|gi|314932740|ref|NZ_GL545268.1|	0.092	99.908	100	108066	108166
Staphylococcus_#_epidermidis_!_APO27_{_genomic_}_scaffold_APO27_scaffold28_whole_genome_shotgun_sequence|gi|520964271|ref|NZ_KE365410.1|	3.39	96.61	100	2850	2950
Staphylococcus_#_epidermidis_!_APO27_{_genomic_}_scaffold_APO27_scaffold313_whole_genome_shotgun_sequence|gi|520965156|ref|NZ_KE365448.1|	0.69	99.31	100	14389	14489
Staphylococcus_#_epidermidis_!_APO27_{_genomic_}_scaffold_APO27_scaffold40_whole_genome_shotgun_sequence|gi|520965452|ref|NZ_KE365473.1|	5.77	94.23	100	1633	1733
Staphylococcus_#_epidermidis_!_APO27_{_genomic_}_scaffold_APO27_scaffold73_whole_genome_shotgun_sequence|gi|520966396|ref|NZ_KE365509.1|	0.352	99.648	100	28315	28415
Staphylococcus_#_epidermidis_!_APO35_{_genomic_}_scaffold_APO35_scaffold201_whole_genome_shotgun_sequence|gi|520970557|ref|NZ_KE365652.1|	5.77	94.23	100	1633	1733
Staphylococcus_#_epidermidis_!_APO35_{_genomic_}_scaffold_APO35_scaffold22_whole_genome_shotgun_sequence|gi|520970854|ref|NZ_KE365672.1|	2.044	97.956	100	4792	4892
Staphylococcus_#_epidermidis_!_APO35_{_genomic_}_scaffold_APO35_scaffold62_whole_genome_shotgun_sequence|gi|520973208|ref|NZ_KE365903.1|	0.232	99.768	100	42921	43021
Staphylococcus_#_epidermidis_!_APO35_{_genomic_}_scaffold_APO35_scaffold67_whole_genome_shotgun_sequence|gi|520973216|ref|NZ_KE365908.1|	3.36	96.64	100	2876	2976
Staphylococcus_#_epidermidis_!_BVS058A4_{_genomic_}_scaffold_supercont1.1_whole_genome_shotgun_sequence|gi|448879114|ref|NZ_KB373335.1|	0.008	99.992	100	1182690	1182790
Staphylococcus_#_epidermidis_!_BVS058A4_{_genomic_}_scaffold_supercont1.3_whole_genome_shotgun_sequence|gi|448879116|ref|NZ_KB373337.1|	0.053	99.947	100	189832	189932
Staphylococcus_#_epidermidis_!_BVS058A4_{_genomic_}_scaffold_supercont1.4_whole_genome_shotgun_sequence|gi|448879117|ref|NZ_KB373338.1|	0.103	99.897	100	97374	97474
Staphylococcus_#_epidermidis_!_BVS058A4_{_genomic_}_scaffold_supercont1.7_whole_genome_shotgun_sequence|gi|448879120|ref|NZ_KB373341.1|	0.206	99.794	100	48476	48576
Staphylococcus_#_epidermidis_!_CIM40_{_genomic_}_scaffold_CIM40_scaffold100_whole_genome_shotgun_sequence|gi|520973298|ref|NZ_KE365946.1|	0.622	99.378	100	15976	16076
Staphylococcus_#_epidermidis_!_CIM40_{_genomic_}_scaffold_CIM40_scaffold11_whole_genome_shotgun_sequence|gi|520973315|ref|NZ_KE365956.1|	3.378	96.622	100	2860	2960
Staphylococcus_#_epidermidis_!_CIM40_{_genomic_}_scaffold_CIM40_scaffold32_whole_genome_shotgun_sequence|gi|520975012|ref|NZ_KE366189.1|	12.903	87.097	100	675	775
Staphylococcus_#_epidermidis_!_CIM40_{_genomic_}_scaffold_CIM40_scaffold98_whole_genome_shotgun_sequence|gi|520975176|ref|NZ_KE366280.1|	0.75	99.25	100	13232	13332
Staphylococcus_#_epidermidis_!_M0881_{_genomic_}_scaffold_acumm-supercont1.1_whole_genome_shotgun_sequence|gi|489045990|ref|NZ_KB821721.1|	0.022	99.978	100	451093	451193
Staphylococcus_#_epidermidis_!_M0881_{_genomic_}_scaffold_acumm-supercont1.2_whole_genome_shotgun_sequence|gi|489046772|ref|NZ_KB821722.1|	0.011	99.989	100	900369	900469
Staphylococcus_#_epidermidis_!_M0881_{_genomic_}_scaffold_acumm-supercont1.4_whole_genome_shotgun_sequence|gi|489047275|ref|NZ_KB821724.1|	0.185	99.815	100	54067	54167
Staphylococcus_#_epidermidis_!_M0881_{_genomic_}_scaffold_acumm-supercont1.5_whole_genome_shotgun_sequence|gi|489047478|ref|NZ_KB821725.1|	0.118	99.882	100	84983	85083
Staphylococcus_#_epidermidis_!_M23864:W2(grey)_{_genomic_}_scaffold_SCAFFOLD11_whole_genome_shotgun_sequence|gi|293368513|ref|NZ_GG749265.1|	12.674	87.326	100	689	789
Staphylococcus_#_epidermidis_!_MC16_{_genomic_}_scaffold_MC16_scaffold215_whole_genome_shotgun_sequence|gi|520975464|ref|NZ_KE370047.1|	2.119	97.881	100	4619	4719
Staphylococcus_#_epidermidis_!_MC16_{_genomic_}_scaffold_MC16_scaffold26_whole_genome_shotgun_sequence|gi|520975580|ref|NZ_KE370096.1|	3.381	96.619	100	2858	2958
Staphylococcus_#_epidermidis_!_MC16_{_genomic_}_scaffold_MC16_scaffold32_whole_genome_shotgun_sequence|gi|520975696|ref|NZ_KE370163.1|	5.764	94.236	100	1635	1735
Staphylococcus_#_epidermidis_!_MC16_{_genomic_}_scaffold_MC16_scaffold88_whole_genome_shotgun_sequence|gi|520975950|ref|NZ_KE370312.1|	0.362	99.638	100	27487	27587
Staphylococcus_#_epidermidis_!_MC19_{_genomic_}_scaffold_MC19_scaffold25_whole_genome_shotgun_sequence|gi|520976260|ref|NZ_KE370492.1|	16.287	83.713	100	514	614
Staphylococcus_#_epidermidis_!_MC19_{_genomic_}_scaffold_MC19_scaffold335_whole_genome_shotgun_sequence|gi|520976425|ref|NZ_KE370587.1|	1.525	98.475	100	6456	6556
Staphylococcus_#_epidermidis_!_MC19_{_genomic_}_scaffold_MC19_scaffold71_whole_genome_shotgun_sequence|gi|520976689|ref|NZ_KE370741.1|	3.195	96.805	100	3030	3130
Staphylococcus_#_epidermidis_!_MC28_{_genomic_}_scaffold_MC28_scaffold16_whole_genome_shotgun_sequence|gi|520976849|ref|NZ_KE366349.1|	3.381	96.619	100	2858	2958
Staphylococcus_#_epidermidis_!_MC28_{_genomic_}_scaffold_MC28_scaffold333_whole_genome_shotgun_sequence|gi|520977172|ref|NZ_KE366542.1|	0.726	99.274	100	13668	13768
Staphylococcus_#_epidermidis_!_MC28_{_genomic_}_scaffold_MC28_scaffold36_whole_genome_shotgun_sequence|gi|520977208|ref|NZ_KE366563.1|	27.548	72.452	100	263	363
Staphylococcus_#_epidermidis_!_MC28_{_genomic_}_scaffold_MC28_scaffold83_whole_genome_shotgun_sequence|gi|520977300|ref|NZ_KE366615.1|	0.22	99.78	100	45351	45451
Staphylococcus_#_epidermidis_!_Scl19_{_genomic_}_scaffold_Scl19_scaffold19_whole_genome_shotgun_sequence|gi|520977472|ref|NZ_KE366733.1|	1.498	98.502	100	6576	6676
Staphylococcus_#_epidermidis_!_Scl19_{_genomic_}_scaffold_Scl19_scaffold1_whole_genome_shotgun_sequence|gi|520977330|ref|NZ_KE366633.1|	4.739	95.261	100	2010	2110
Staphylococcus_#_epidermidis_!_Scl19_{_genomic_}_scaffold_Scl19_scaffold2_whole_genome_shotgun_sequence|gi|520977494|ref|NZ_KE366744.1|	7.639	92.361	100	1209	1309
Staphylococcus_#_epidermidis_!_Scl19_{_genomic_}_scaffold_Scl19_scaffold73_whole_genome_shotgun_sequence|gi|520977747|ref|NZ_KE366904.1|	0.256	99.744	100	38949	39049
Staphylococcus_#_epidermidis_!_Scl22_{_genomic_}_scaffold_Scl22_scaffold107_whole_genome_shotgun_sequence|gi|520977798|ref|NZ_KE366942.1|	0.574	99.426	100	17321	17421
Staphylococcus_#_epidermidis_!_Scl22_{_genomic_}_scaffold_Scl22_scaffold148_whole_genome_shotgun_sequence|gi|520977871|ref|NZ_KE366987.1|	0.743	99.257	100	13354	13454
Staphylococcus_#_epidermidis_!_Scl22_{_genomic_}_scaffold_Scl22_scaffold54_whole_genome_shotgun_sequence|gi|520978517|ref|NZ_KE367373.1|	5.77	94.23	100	1633	1733
Staphylococcus_#_epidermidis_!_Scl22_{_genomic_}_scaffold_Scl22_scaffold65_whole_genome_shotgun_sequence|gi|520978534|ref|NZ_KE367385.1|	3.733	96.267	100	2579	2679
Staphylococcus_#_epidermidis_!_Scl25_{_genomic_}_scaffold_Scl25_scaffold110_whole_genome_shotgun_sequence|gi|520978631|ref|NZ_KE367436.1|	0.905	99.095	100	10953	11053
Staphylococcus_#_epidermidis_!_Scl25_{_genomic_}_scaffold_Scl25_scaffold18_whole_genome_shotgun_sequence|gi|520978799|ref|NZ_KE367512.1|	6.234	93.766	100	1504	1604
Staphylococcus_#_epidermidis_!_Scl25_{_genomic_}_scaffold_Scl25_scaffold208_whole_genome_shotgun_sequence|gi|520978871|ref|NZ_KE367544.1|	6.098	93.902	100	1540	1640
Staphylococcus_#_epidermidis_!_Scl25_{_genomic_}_scaffold_Scl25_scaffold9_whole_genome_shotgun_sequence|gi|520979376|ref|NZ_KE367791.1|	0.288	99.712	100	34625	34725
Staphylococcus_#_epidermidis_!_Scl31_{_genomic_}_scaffold_Scl31_scaffold12_whole_genome_shotgun_sequence|gi|520979433|ref|NZ_KE367825.1|	6.435	93.565	100	1454	1554
Staphylococcus_#_epidermidis_!_Scl31_{_genomic_}_scaffold_Scl31_scaffold361_whole_genome_shotgun_sequence|gi|520979896|ref|NZ_KE368093.1|	30.395	69.605	100	229	329
Staphylococcus_#_epidermidis_!_Scl31_{_genomic_}_scaffold_Scl31_scaffold62_whole_genome_shotgun_sequence|gi|520980390|ref|NZ_KE368379.1|	1.657	98.343	100	5935	6035
Staphylococcus_#_epidermidis_!_Scl31_{_genomic_}_scaffold_Scl31_scaffold85_whole_genome_shotgun_sequence|gi|520980433|ref|NZ_KE368404.1|	0.311	99.689	100	32034	32134
Staphylococcus_#_epidermidis_!_Sentile1_{_genomic_}_scaffold_Sentile1_scaffold14_whole_genome_shotgun_sequence|gi|520980542|ref|NZ_KE368465.1|	0.249	99.751	100	40015	40115
Staphylococcus_#_epidermidis_!_Sentile1_{_genomic_}_scaffold_Sentile1_scaffold209_whole_genome_shotgun_sequence|gi|520980675|ref|NZ_KE368542.1|	1.062	98.938	100	9316	9416
Staphylococcus_#_epidermidis_!_Sentile1_{_genomic_}_scaffold_Sentile1_scaffold42_whole_genome_shotgun_sequence|gi|520980978|ref|NZ_KE368725.1|	3.369	96.631	100	2868	2968
Staphylococcus_#_epidermidis_!_Sentile1_{_genomic_}_scaffold_Sentile1_scaffold64_whole_genome_shotgun_sequence|gi|520981017|ref|NZ_KE368749.1|	5.77	94.23	100	1633	1733
Staphylococcus_#_epidermidis_!_Sentile2_{_genomic_}_scaffold_Sentile2_scaffold292_whole_genome_shotgun_sequence|gi|520981443|ref|NZ_KE369002.1|	0.676	99.324	100	14699	14799
Staphylococcus_#_epidermidis_!_Sentile2_{_genomic_}_scaffold_Sentile2_scaffold49_whole_genome_shotgun_sequence|gi|520981667|ref|NZ_KE369136.1|	0.515	99.485	100	19331	19431
Staphylococcus_#_epidermidis_!_Sentile2_{_genomic_}_scaffold_Sentile2_scaffold53_whole_genome_shotgun_sequence|gi|520981676|ref|NZ_KE369141.1|	3.381	96.619	100	2858	2958
Staphylococcus_#_epidermidis_!_Sentile2_{_genomic_}_scaffold_Sentile2_scaffold60_whole_genome_shotgun_sequence|gi|520981692|ref|NZ_KE369149.1|	5.879	94.121	100	1601	1701
Staphylococcus_#_epidermidis_!_W23144_{_genomic_}_scaffold_SCAFFOLD2_whole_genome_shotgun_sequence|gi|254212920|ref|NZ_GG696800.1|	0.015	99.985	100	650336	650436
Staphylococcus_#_epidermidis_!_WI05_{_genomic_}_scaffold_WI05_scaffold114_whole_genome_shotgun_sequence|gi|520981788|ref|NZ_KE369209.1|	8.818	91.182	100	1034	1134
Staphylococcus_#_epidermidis_!_WI05_{_genomic_}_scaffold_WI05_scaffold141_whole_genome_shotgun_sequence|gi|520981838|ref|NZ_KE369239.1|	1.511	98.489	100	6520	6620
Staphylococcus_#_epidermidis_!_WI05_{_genomic_}_scaffold_WI05_scaffold2_whole_genome_shotgun_sequence|gi|520981945|ref|NZ_KE369303.1|	3.381	96.619	100	2858	2958
Staphylococcus_#_epidermidis_!_WI05_{_genomic_}_scaffold_WI05_scaffold45_whole_genome_shotgun_sequence|gi|520982219|ref|NZ_KE369480.1|	0.221	99.779	100	45081	45181
Staphylococcus_#_epidermidis_!_WI09_{_genomic_}_scaffold_WI09_scaffold101_whole_genome_shotgun_sequence|gi|520982314|ref|NZ_KE369543.1|	1.072	98.928	100	9232	9332
Staphylococcus_#_epidermidis_!_WI09_{_genomic_}_scaffold_WI09_scaffold44_whole_genome_shotgun_sequence|gi|520982807|ref|NZ_KE369857.1|	0.232	99.768	100	43012	43112
Staphylococcus_#_epidermidis_!_WI09_{_genomic_}_scaffold_WI09_scaffold54_whole_genome_shotgun_sequence|gi|520982826|ref|NZ_KE369868.1|	5.886	94.114	100	1599	1699
Staphylococcus_#_epidermidis_!_WI09_{_genomic_}_scaffold_WI09_scaffold55_whole_genome_shotgun_sequence|gi|520982827|ref|NZ_KE369869.1|	3.361	96.639	100	2875	2975
Staphylococcus_#_hominis_!_subsp._{_hominis_}_C80_genomic_scaffold_supercont1.9_whole_genome_shotgun_sequence|gi|314936087|ref|NZ_GL545260.1|	0.009	99.991	100	1140816	1140916
Staphylococcus_#_saprophyticus_!_subsp._{_saprophyticus_}_MS1146_plasmid_pSSAP1_complete_sequence|gi|330827429|ref|NC_015432.1|	0.151	99.849	100	66004	66104
Staphylococcus_#_simulans_!_ACS-120-V-Sch1_{_genomic_}_scaffold_supercont1.3_whole_genome_shotgun_sequence|gi|448879139|ref|NZ_KB373328.1|	0.03	99.97	100	333504	333604
Staphylococcus_#_warneri_!_SG1_{_plasmid_}_clone_pvSw2_genomic_sequence|gi|449338574|ref|NC_020264.1|	1.215	98.785	100	8132	8232
Staphylococcus_#_warneri_!_SG1_{_plasmid_}_clone_pvSw4_genomic_sequence|gi|449338590|ref|NC_020266.1|	0.503	99.497	100	19766	19866
Staphylococcus_#_warneri_!_SG1_{_plasmid_}_clone_pvSw5_genomic_sequence|gi|449338615|ref|NC_020267.1|	0.606	99.394	100	16415	16515
Staphylococcus_#_warneri_!_SG1_{_plasmid_}_clone_pvSw6_genomic_sequence|gi|449338638|ref|NC_020268.1|	1.61	98.39	100	6112	6212

## Sheet: 10K
Organism	Genome_Coverage(%)	Genome_Not_Covered(%)	Genome_Coverage	Genome_Not_Covered	Genome_Size
Staphylococcus_#_aureus_!_subsp._{_aureus_}_USA300_TCH1516_chromosome_complete_genome|gi|161508266|ref|NC_010079.1|	30.126	69.874	865501	2007414	2872915
Staphylococcus_#_aureus_!_subsp._{_aureus_}_USA300_FPR3757_chromosome_complete_genome|gi|87159884|ref|NC_007793.1|	30.114	69.886	865093	2007676	2872769
Staphylococcus_#_aureus_!_subsp._{_aureus_}_COL_chromosome_complete_genome|gi|57650036|ref|NC_002951.2|	29.517	70.483	829262	1980160	2809422
Staphylococcus_#_aureus_!_M1_{_complete_}_genome|gi|479328021|ref|NC_021059.1|	28.753	71.247	823531	2040594	2864125
Staphylococcus_#_aureus_!_subsp._{_aureus_}_str._Newman_chromosome_complete_genome|gi|151220212|ref|NC_009641.1|	28.551	71.449	821965	2056932	2878897
Staphylococcus_#_aureus_!_subsp._{_aureus_}_NCTC_8325_chromosome_complete_genome|gi|88193823|ref|NC_007795.1|	29.112	70.888	821356	2000005	2821361
Staphylococcus_#_aureus_!_subsp._{_aureus_}_VC40_chromosome_complete_genome|gi|379013365|ref|NC_016912.1|	29.952	70.048	806469	1886101	2692570
Staphylococcus_#_aureus_!_Bmb9393_{_complete_}_genome|gi|521210823|ref|NC_021670.1|	26.736	73.264	796887	2183661	2980548
Staphylococcus_#_aureus_!_subsp._{_aureus_}_MW2_complete_genome|gi|21281729|ref|NC_003923.1|	27.879	72.121	786325	2034137	2820462
Staphylococcus_#_aureus_!_subsp._{_aureus_}_JH9_chromosome_complete_genome|gi|148266447|ref|NC_009487.1|	26.849	73.151	780427	2126273	2906700
Staphylococcus_#_aureus_!_subsp._{_aureus_}_11819-97_chromosome_complete_genome|gi|385780298|ref|NC_017351.1|	27.022	72.978	769205	2077341	2846546
Staphylococcus_#_aureus_!_subsp._{_aureus_}_TW20_complete_genome|gi|387141638|ref|NC_017331.1|	25.221	74.779	767532	2275678	3043210
Staphylococcus_#_aureus_!_subsp._{_aureus_}_N315_chromosome_complete_genome|gi|29165615|ref|NC_002745.2|	27.201	72.799	765661	2049155	2814816
Staphylococcus_#_aureus_!_subsp._{_aureus_}_ED98_complete_genome|gi|269201690|ref|NC_013450.1|	27.009	72.991	762843	2061561	2824404
Staphylococcus_#_aureus_!_subsp._{_aureus_}_MSSA476_chromosome_complete_genome|gi|49484912|ref|NC_002953.3|	27.211	72.789	761863	2037939	2799802
Staphylococcus_#_aureus_!_subsp._{_aureus_}_ST228_complete_genome_isolate_15532|gi|470192280|ref|NC_020532.1|	27.506	72.494	759127	2000756	2759883
Staphylococcus_#_aureus_!_subsp._{_aureus_}_ST228_complete_genome_isolate_10388|gi|470190315|ref|NC_020529.1|	27.506	72.494	759033	2000477	2759510
Staphylococcus_#_aureus_!_subsp._{_aureus_}_ST228_complete_genome_isolate_18341|gi|470196211|ref|NC_020536.1|	27.505	72.495	758986	2000487	2759473
Staphylococcus_#_aureus_!_subsp._{_aureus_}_ST228_complete_genome_isolate_10497|gi|470217946|ref|NC_020564.1|	27.502	72.498	758917	2000595	2759512
Staphylococcus_#_aureus_!_M0235_{_genomic_}_scaffold_acumc-supercont1.1_whole_genome_shotgun_sequence|gi|487361831|ref|NZ_KB821130.1|	26.836	73.164	758676	2068400	2827076
Staphylococcus_#_aureus_!_subsp._{_aureus_}_ST228_complete_genome_isolate_18583|gi|470223734|ref|NC_020568.1|	27.494	72.506	758656	2000672	2759328
Staphylococcus_#_aureus_!_subsp._{_aureus_}_ST228_complete_genome_isolate_16035|gi|470194245|ref|NC_020533.1|	27.487	72.513	758585	2001250	2759835
Staphylococcus_#_aureus_!_subsp._{_aureus_}_ST228_complete_genome_isolate_18412|gi|470198176|ref|NC_020537.1|	27.49	72.51	758523	2000740	2759263
Staphylococcus_#_aureus_!_subsp._{_aureus_}_ST228_complete_genome_isolate_16125|gi|470221770|ref|NC_020566.1|	27.482	72.518	758346	2001111	2759457
Staphylococcus_#_aureus_!_subsp._{_aureus_}_T0131_chromosome_complete_genome|gi|384868588|ref|NC_017347.1|	25.954	74.046	756277	2157623	2913900
Staphylococcus_#_aureus_!_subsp._{_aureus_}_str._JKD6008_chromosome_complete_genome|gi|384860682|ref|NC_017341.1|	25.783	74.217	753972	2170372	2924344
Staphylococcus_#_aureus_!_M1216_{_genomic_}_scaffold_acumJ-supercont-complete_whole_genome_shotgun_sequence|gi|493203888|ref|NZ_KB822075.1|	25.757	74.243	719487	2073888	2793375
Staphylococcus_#_aureus_!_subsp._{_aureus_}_JH1_chromosome_complete_genome|gi|150392480|ref|NC_009632.1|	23.743	76.257	690096	2216411	2906507
Staphylococcus_#_aureus_!_subsp._{_aureus_}_ECT-R_2_complete_genome|gi|384863396|ref|NC_017343.1|	25.071	74.929	684331	2045209	2729540
Staphylococcus_#_aureus_!_08BA02176_{_chromosome_}_complete_genome|gi|404477334|ref|NC_018608.1|	24.428	75.572	679675	2102638	2782313
Staphylococcus_#_aureus_!_subsp._{_aureus_}_Mu50_chromosome_complete_genome|gi|57634611|ref|NC_002758.2|	23.539	76.461	677576	2200953	2878529
Staphylococcus_#_aureus_!_04-02981_{_chromosome_}_complete_genome|gi|387149188|ref|NC_017340.1|	23.962	76.038	676080	2145372	2821452
Staphylococcus_#_aureus_!_subsp._{_aureus_}_Mu3_complete_genome|gi|156978331|ref|NC_009782.1|	23.345	76.655	672362	2207806	2880168
Staphylococcus_#_aureus_!_CA-347_{_complete_}_genome|gi|514064966|ref|NC_021554.1|	23.264	76.736	663130	2187373	2850503
Staphylococcus_#_aureus_!_subsp._{_aureus_}_HO_5096_0412_complete_genome|gi|386829725|ref|NC_017763.1|	21.756	78.244	616195	2216104	2832299
Staphylococcus_#_aureus_!_subsp._{_aureus_}_MRSA252_chromosome_complete_genome|gi|49482253|ref|NC_002952.2|	19.796	80.204	574610	2328009	2902619
Staphylococcus_#_aureus_!_subsp._{_aureus_}_ED133_chromosome_complete_genome|gi|384546269|ref|NC_017337.1|	18.996	81.004	538068	2294410	2832478
Staphylococcus_#_aureus_!_subsp._{_aureus_}_LGA251_complete_genome|gi|387779217|ref|NC_017349.1|	19.538	80.462	537464	2213370	2750834
Staphylococcus_#_aureus_!_subsp._{_aureus_}_M013_chromosome_complete_genome|gi|379019812|ref|NC_016928.1|	19.232	80.768	536309	2252327	2788636
Staphylococcus_#_aureus_!_subsp._{_aureus_}_JKD6159_chromosome_complete_genome|gi|384548923|ref|NC_017338.1|	18.978	81.022	533561	2277874	2811435
Staphylococcus_#_aureus_!_subsp._{_aureus_}_ST398_complete_genome|gi|387601291|ref|NC_017333.1|	18.069	81.931	519034	2353548	2872582
Staphylococcus_#_aureus_!_subsp._{_aureus_}_TCH60_chromosome_complete_genome|gi|384865886|ref|NC_017342.1|	18.152	81.848	508749	2293926	2802675
Staphylococcus_#_aureus_!_subsp._{_aureus_}_71193_chromosome_complete_genome|gi|386727822|ref|NC_017673.1|	18.685	81.315	507289	2207711	2715000
Staphylococcus_#_aureus_!_RF122_{_complete_}_genome|gi|82749777|ref|NC_007622.1|	17.826	82.174	488876	2253655	2742531
Staphylococcus_#_aureus_!_M0580_{_genomic_}_scaffold_acvrg-supercont1.2_whole_genome_shotgun_sequence|gi|486357261|ref|NZ_KB821487.1|	26.491	73.509	389725	1081458	1471183
Staphylococcus_#_aureus_!_M0326_{_genomic_}_scaffold_acrHf-supercont1.2_whole_genome_shotgun_sequence|gi|486268272|ref|NZ_KB821203.1|	27.286	72.714	334352	890987	1225339
Staphylococcus_#_aureus_!_M1373_{_genomic_}_scaffold_acumD-supercont1.4_whole_genome_shotgun_sequence|gi|488719292|ref|NZ_KB822213.1|	27.017	72.983	327152	883758	1210910
Staphylococcus_#_aureus_!_M1188_{_genomic_}_scaffold_acumb-supercont1.2_whole_genome_shotgun_sequence|gi|493196425|ref|NZ_KB822058.1|	26.221	73.779	318867	897190	1216057
Staphylococcus_#_aureus_!_M0450_{_genomic_}_scaffold_acqwq-supercont1.3_whole_genome_shotgun_sequence|gi|486302842|ref|NZ_KB821345.1|	27.098	72.902	303727	817136	1120863
Staphylococcus_#_aureus_!_M1188_{_genomic_}_scaffold_acumb-supercont1.4_whole_genome_shotgun_sequence|gi|493198238|ref|NZ_KB822060.1|	24.602	75.398	303028	928691	1231719
Staphylococcus_#_aureus_!_M0173_{_genomic_}_scaffold_acrHj-supercont1.2_whole_genome_shotgun_sequence|gi|486253586|ref|NZ_KB821071.1|	28.117	71.883	299071	764596	1063667
Staphylococcus_#_aureus_!_M0998_{_genomic_}_scaffold_acvqv-supercont1.6_whole_genome_shotgun_sequence|gi|486398674|ref|NZ_KB821818.1|	25.92	74.08	279248	798085	1077333
Staphylococcus_#_aureus_!_HI049C_{_genomic_}_scaffold_acqxH-supercont1.1_whole_genome_shotgun_sequence|gi|486211608|ref|NZ_KB820909.1|	9.545	90.455	275784	2613586	2889370
Staphylococcus_#_aureus_!_HI010_{_genomic_}_scaffold_acqxi-supercont1.1_whole_genome_shotgun_sequence|gi|486203361|ref|NZ_KB820894.1|	9.601	90.399	275776	2596586	2872362
Staphylococcus_#_aureus_!_HI049B_{_genomic_}_scaffold_acqxg-supercont1.1_whole_genome_shotgun_sequence|gi|486205205|ref|NZ_KB820906.1|	9.536	90.464	275538	2613988	2889526
Staphylococcus_#_aureus_!_HI111_{_genomic_}_scaffold_acqwe-supercont1.1_whole_genome_shotgun_sequence|gi|486214133|ref|NZ_KB820916.1|	9.308	90.692	263649	2568877	2832526
Staphylococcus_#_aureus_!_HI022_{_genomic_}_scaffold_acqwY-supercont1.1_whole_genome_shotgun_sequence|gi|486209995|ref|NZ_KB820903.1|	9.211	90.789	259635	2559234	2818869
Staphylococcus_#_aureus_!_M0531_{_genomic_}_scaffold_acvqQ-supercont1.1_whole_genome_shotgun_sequence|gi|486342614|ref|NZ_KB821438.1|	9.081	90.919	258020	2583254	2841274
Staphylococcus_#_aureus_!_M0695_{_genomic_}_scaffold_acunx-supercont1.4_whole_genome_shotgun_sequence|gi|489045023|ref|NZ_KB821609.1|	27.769	72.231	255636	664929	920565
Staphylococcus_#_aureus_!_M0312_{_genomic_}_scaffold_acqxO-supercont1.1_whole_genome_shotgun_sequence|gi|487376936|ref|NZ_KB821215.1|	8.365	91.635	246251	2697484	2943735
Staphylococcus_#_aureus_!_M0055_{_genomic_}_scaffold_acumI-supercont1.1_whole_genome_shotgun_sequence|gi|487290252|ref|NZ_KB820976.1|	8.32	91.68	243521	2683318	2926839
Staphylococcus_#_aureus_!_M0831_{_genomic_}_scaffold_acumY-supercont-complete_whole_genome_shotgun_sequence|gi|487384247|ref|NZ_KB821688.1|	8.233	91.767	243504	2714277	2957781
Staphylococcus_#_aureus_!_M0468_{_genomic_}_scaffold_acqxk-supercont1.2_whole_genome_shotgun_sequence|gi|486310012|ref|NZ_KB821359.1|	8.237	91.763	242508	2701672	2944180
Staphylococcus_#_aureus_!_M0221_{_genomic_}_scaffold_acqxa-supercont1.2_whole_genome_shotgun_sequence|gi|486259720|ref|NZ_KB821124.1|	8.363	91.637	240200	2631919	2872119
Staphylococcus_#_aureus_!_M0823_{_genomic_}_scaffold_acvqk-supercont1.8_whole_genome_shotgun_sequence|gi|486383952|ref|NZ_KB821698.1|	26.546	73.454	238338	659479	897817
Staphylococcus_#_aureus_!_M0769_{_genomic_}_scaffold_acvqF-supercont1.7_whole_genome_shotgun_sequence|gi|480448432|ref|NZ_KB821635.1|	25.505	74.495	234233	684141	918374
Staphylococcus_#_aureus_!_M0340_{_genomic_}_scaffold_acqxN-supercont1.2_whole_genome_shotgun_sequence|gi|486280931|ref|NZ_KB821242.1|	8.473	91.527	231560	2501377	2732937
Staphylococcus_#_aureus_!_HIF003_B2N-C_{_genomic_}_scaffold_acqxV-supercont1.1_whole_genome_shotgun_sequence|gi|486209139|ref|NZ_KB820925.1|	8.328	91.672	229445	2525551	2754996
Staphylococcus_#_aureus_!_M1286_{_genomic_}_scaffold_acuob-supercont1.10_whole_genome_shotgun_sequence|gi|487397932|ref|NZ_KB822142.1|	26.85	73.15	212194	578110	790304
Staphylococcus_#_aureus_!_M0695_{_genomic_}_scaffold_acunx-supercont1.18_whole_genome_shotgun_sequence|gi|489044982|ref|NZ_KB821605.1|	26.213	73.787	209330	589251	798581
Staphylococcus_#_aureus_!_subsp._{_aureus_}_ATCC_BAA-39_genomic_scaffold_SCAFFOLD1_whole_genome_shotgun_sequence|gi|305431397|ref|NZ_GL397103.1|	6.686	93.314	193888	2706224	2900112
Staphylococcus_#_aureus_!_M1462_{_genomic_}_scaffold_acumH-supercont1.3_whole_genome_shotgun_sequence|gi|487135576|ref|NZ_KB822552.1|	8.028	91.972	193612	2217953	2411565
Staphylococcus_#_aureus_!_subsp._{_aureus_}_55/2053_genomic_scaffold_supercont1.1_whole_genome_shotgun_sequence|gi|257423656|ref|NZ_GG700533.1|	18.306	81.694	187970	838856	1026826
Staphylococcus_#_aureus_!_M1015_{_genomic_}_scaffold_acvqH-supercont1.4_whole_genome_shotgun_sequence|gi|486404434|ref|NZ_KB821837.1|	27.139	72.861	160988	432212	593200
Staphylococcus_#_aureus_!_M0602_{_genomic_}_scaffold_acvqp-supercont1.2_whole_genome_shotgun_sequence|gi|486358344|ref|NZ_KB821494.1|	28.47	71.53	160987	404471	565458
Staphylococcus_#_aureus_!_M0695_{_genomic_}_scaffold_acunx-supercont1.5_whole_genome_shotgun_sequence|gi|489045039|ref|NZ_KB821610.1|	27.928	72.072	159814	412431	572245
Staphylococcus_#_aureus_!_HI049_{_genomic_}_scaffold_acqxW-supercont1.1_whole_genome_shotgun_sequence|gi|486200690|ref|NZ_KB820912.1|	8.718	91.282	151203	1583075	1734278
Staphylococcus_#_aureus_!_HI168_{_genomic_}_scaffold_acqxp-supercont1.3_whole_genome_shotgun_sequence|gi|486213000|ref|NZ_KB820921.1|	8.327	91.673	146807	1616252	1763059
Staphylococcus_#_aureus_!_HI013_{_genomic_}_scaffold_acqwl-supercont1.2_whole_genome_shotgun_sequence|gi|486215615|ref|NZ_KB820899.1|	8.685	91.315	144606	1520317	1664923
Staphylococcus_#_aureus_!_subsp._{_aureus_}_TCH70_genomic_scaffold_SCAFFOLD1_whole_genome_shotgun_sequence|gi|311744845|ref|NZ_GL538356.1|	4.966	95.034	138387	2648191	2786578
Staphylococcus_#_aureus_!_M1223_{_genomic_}_scaffold_acune-supercont1.3_whole_genome_shotgun_sequence|gi|487396419|ref|NZ_KB822073.1|	7.725	92.275	128748	1537853	1666601
Staphylococcus_#_aureus_!_M1007_{_genomic_}_scaffold_acvqZ-supercont1.3_whole_genome_shotgun_sequence|gi|486401503|ref|NZ_KB821831.1|	7.661	92.339	128362	1547078	1675440
Staphylococcus_#_aureus_!_HI013_{_genomic_}_scaffold_acqwl-supercont1.1_whole_genome_shotgun_sequence|gi|486215046|ref|NZ_KB820898.1|	11.096	88.904	126205	1011156	1137361
Staphylococcus_#_aureus_!_HI049_{_genomic_}_scaffold_acqxW-supercont1.2_whole_genome_shotgun_sequence|gi|486202079|ref|NZ_KB820913.1|	11.036	88.964	125523	1011876	1137399
Staphylococcus_#_aureus_!_HI168_{_genomic_}_scaffold_acqxp-supercont1.1_whole_genome_shotgun_sequence|gi|486212462|ref|NZ_KB820919.1|	11.204	88.796	122754	972884	1095638
Staphylococcus_#_aureus_!_M0424_{_genomic_}_scaffold_acunn-supercont1.3_whole_genome_shotgun_sequence|gi|487368144|ref|NZ_KB821339.1|	7.886	92.114	118528	1384513	1503041
Staphylococcus_#_aureus_!_M1064_{_genomic_}_scaffold_acumU-supercont1.6_whole_genome_shotgun_sequence|gi|486420802|ref|NZ_KB821942.1|	7.909	92.091	118456	1379311	1497767
Staphylococcus_#_aureus_!_M0633_{_genomic_}_scaffold_acyCm-supercont1.2_whole_genome_shotgun_sequence|gi|487371925|ref|NZ_KB821508.1|	7.867	92.133	117248	1373076	1490324
Staphylococcus_#_aureus_!_M0177_{_genomic_}_scaffold_acumi-supercont1.1_whole_genome_shotgun_sequence|gi|487359982|ref|NZ_KB821078.1|	26.724	73.276	116619	319772	436391
Staphylococcus_#_aureus_!_M0239_{_genomic_}_scaffold_acqxh-supercont1.1_whole_genome_shotgun_sequence|gi|486264624|ref|NZ_KB821128.1|	4.094	95.906	111618	2614943	2726561
Staphylococcus_#_aureus_!_M1188_{_genomic_}_scaffold_acumb-supercont1.3_whole_genome_shotgun_sequence|gi|493196995|ref|NZ_KB822059.1|	26.47	73.53	108413	301164	409577
Staphylococcus_#_aureus_!_M1223_{_genomic_}_scaffold_acune-supercont1.1_whole_genome_shotgun_sequence|gi|487396341|ref|NZ_KB822071.1|	9.256	90.744	108247	1061190	1169437
Staphylococcus_#_aureus_!_M1007_{_genomic_}_scaffold_acvqZ-supercont1.1_whole_genome_shotgun_sequence|gi|486400527|ref|NZ_KB821829.1|	9.655	90.345	107260	1003634	1110894
Staphylococcus_#_aureus_!_M0424_{_genomic_}_scaffold_acunn-supercont1.1_whole_genome_shotgun_sequence|gi|487367914|ref|NZ_KB821337.1|	9.569	90.431	106891	1010114	1117005
Staphylococcus_#_aureus_!_M0328_{_genomic_}_scaffold_acrGR-supercont1.1_whole_genome_shotgun_sequence|gi|486271607|ref|NZ_KB821211.1|	27.465	72.535	97461	257391	354852
Staphylococcus_#_aureus_!_M1064_{_genomic_}_scaffold_acumU-supercont1.1_whole_genome_shotgun_sequence|gi|486419252|ref|NZ_KB821934.1|	9.659	90.341	87066	814300	901366
Staphylococcus_#_aureus_!_subsp._{_aureus_}_M809_genomic_scaffold_supercont1.8_whole_genome_shotgun_sequence|gi|293509340|ref|NZ_GG749306.1|	20.455	79.545	81909	318517	400426
Staphylococcus_#_aureus_!_M0695_{_genomic_}_scaffold_acunx-supercont1.1_whole_genome_shotgun_sequence|gi|489044929|ref|NZ_KB821596.1|	25.038	74.962	79237	237231	316468
Staphylococcus_#_aureus_!_subsp._{_aureus_}_MSHR1132_complete_genome|gi|379794527|ref|NC_016941.1|	2.846	97.154	78619	2684166	2762785
Staphylococcus_#_aureus_!_subsp._{_aureus_}_MN8_chromosome_whole_genome_shotgun_sequence|gi|298527634|ref|NZ_CM000952.1|	2.633	97.367	76347	2823241	2899588
Staphylococcus_#_aureus_!_M0396_{_genomic_}_scaffold_acunf-supercont1.4_whole_genome_shotgun_sequence|gi|487367492|ref|NZ_KB821299.1|	4.712	95.288	75026	1517245	1592271
Staphylococcus_#_aureus_!_M0513_{_genomic_}_scaffold_acumP-supercont-complete_whole_genome_shotgun_sequence|gi|487369849|ref|NZ_KB821413.1|	2.527	97.473	74106	2858744	2932850
Staphylococcus_#_aureus_!_M1373_{_genomic_}_scaffold_acumD-supercont1.7_whole_genome_shotgun_sequence|gi|488719319|ref|NZ_KB822216.1|	24.181	75.819	72530	227418	299948
Staphylococcus_#_aureus_!_subsp._{_aureus_}_ATCC_51811_genomic_scaffold_SCAFFOLD1_whole_genome_shotgun_sequence|gi|297210119|ref|NZ_GG774480.1|	4.723	95.277	66131	1334174	1400305
Staphylococcus_#_aureus_!_subsp._{_aureus_}_LCT-SA112_Scaffold1_whole_genome_shotgun_sequence|gi|452721112|ref|NZ_JH691956.1|	2.337	97.663	64496	2694935	2759431
Staphylococcus_#_aureus_!_M1373_{_genomic_}_scaffold_acumD-supercont1.5_whole_genome_shotgun_sequence|gi|488719293|ref|NZ_KB822214.1|	28.565	71.435	64368	160969	225337
Staphylococcus_#_aureus_!_M0633_{_genomic_}_scaffold_acyCm-supercont1.4_whole_genome_shotgun_sequence|gi|487372090|ref|NZ_KB821510.1|	9.459	90.541	61455	588234	649689
Staphylococcus_#_aureus_!_M1228_{_genomic_}_scaffold_acunW-supercont1.2_whole_genome_shotgun_sequence|gi|487401372|ref|NZ_KB822377.1|	3.673	96.327	57593	1510418	1568011
Staphylococcus_#_aureus_!_subsp._{_aureus_}_ATCC_51811_genomic_scaffold_SCAFFOLD2_whole_genome_shotgun_sequence|gi|297210120|ref|NZ_GG774481.1|	4.725	95.275	53975	1088236	1142211
Staphylococcus_#_aureus_!_subsp._{_aureus_}_USA300_TCH959_genomic_scaffold_SCAFFOLD1_whole_genome_shotgun_sequence|gi|255926317|ref|NZ_GG697985.1|	3.652	96.348	51090	1347696	1398786
Staphylococcus_#_aureus_!_M1462_{_genomic_}_scaffold_acumH-supercont1.1_whole_genome_shotgun_sequence|gi|487135346|ref|NZ_KB822550.1|	9.545	90.455	48385	458553	506938
Staphylococcus_#_aureus_!_subsp._{_aureus_}_USA300_TCH959_genomic_scaffold_SCAFFOLD2_whole_genome_shotgun_sequence|gi|255926318|ref|NZ_GG697986.1|	4.567	95.433	46504	971743	1018247
Staphylococcus_#_aureus_!_M1255_{_genomic_}_scaffold_acunA-supercont1.5_whole_genome_shotgun_sequence|gi|486688395|ref|NZ_KB822120.1|	26.443	73.557	46214	128555	174769
Staphylococcus_#_aureus_!_M0633_{_genomic_}_scaffold_acyCm-supercont1.1_whole_genome_shotgun_sequence|gi|487371765|ref|NZ_KB821507.1|	8.595	91.405	45943	488577	534520
Staphylococcus_#_aureus_!_M1228_{_genomic_}_scaffold_acunW-supercont1.1_whole_genome_shotgun_sequence|gi|487401221|ref|NZ_KB822376.1|	3.175	96.825	39111	1192916	1232027
Staphylococcus_#_aureus_!_M0396_{_genomic_}_scaffold_acunf-supercont1.2_whole_genome_shotgun_sequence|gi|487367086|ref|NZ_KB821297.1|	4.937	95.063	36579	704288	740867
Staphylococcus_#_aureus_!_M1256_{_genomic_}_scaffold_acunO-supercont1.1_whole_genome_shotgun_sequence|gi|487397331|ref|NZ_KB822114.1|	2.62	97.38	35992	1337904	1373896
Staphylococcus_#_aureus_!_subsp._{_aureus_}_MRSA131_genomic_scaffold_Scfld122_whole_genome_shotgun_sequence|gi|422746016|ref|NZ_GL638181.1|	10.354	89.646	35774	309745	345519
Staphylococcus_#_aureus_!_M1309_{_genomic_}_scaffold_acunC-supercont1.6_whole_genome_shotgun_sequence|gi|487398463|ref|NZ_KB822161.1|	28.7	71.3	33858	84116	117974
Staphylococcus_#_aureus_!_subsp._{_aureus_}_MRSA131_genomic_scaffold_Scfld83_whole_genome_shotgun_sequence|gi|422745409|ref|NZ_GL638175.1|	6.911	93.089	33753	454624	488377
Staphylococcus_#_aureus_!_subsp._{_aureus_}_H19_genomic_scaffold_supercont1.8_whole_genome_shotgun_sequence|gi|283769672|ref|NZ_GG730342.1|	2.359	97.641	32703	1353632	1386335
Staphylococcus_#_aureus_!_M1256_{_genomic_}_scaffold_acunO-supercont1.2_whole_genome_shotgun_sequence|gi|487397459|ref|NZ_KB822115.1|	2.237	97.763	31972	1397256	1429228
Staphylococcus_#_aureus_!_subsp._{_aureus_}_TCH130_genomic_scaffold_SCAFFOLD1_whole_genome_shotgun_sequence|gi|255925763|ref|NZ_GG698158.1|	4.56	95.44	31481	658941	690422
Staphylococcus_#_aureus_!_subsp._{_aureus_}_E1410_genomic_scaffold_supercont1.2_whole_genome_shotgun_sequence|gi|257431621|ref|NZ_GG700598.1|	2.959	97.041	31295	1026331	1057626
Staphylococcus_#_aureus_!_M0695_{_genomic_}_scaffold_acunx-supercont1.2_whole_genome_shotgun_sequence|gi|489044993|ref|NZ_KB821607.1|	18.935	81.065	31146	133347	164493
Staphylococcus_#_aureus_!_M0408_{_genomic_}_scaffold_acrHk-supercont1.1_whole_genome_shotgun_sequence|gi|486293955|ref|NZ_KB821326.1|	2.553	97.447	30833	1176890	1207723
Staphylococcus_#_aureus_!_subsp._{_aureus_}_MRSA131_genomic_scaffold_Scfld545_whole_genome_shotgun_sequence|gi|422747480|ref|NZ_GL638198.1|	10.314	89.686	30416	264476	294892
Staphylococcus_#_aureus_!_subsp._{_aureus_}_A017934/97_genomic_scaffold_supercont1.19_whole_genome_shotgun_sequence|gi|283958999|ref|NZ_GG731513.1|	2.912	97.088	28903	963538	992441
Staphylococcus_#_aureus_!_M1311_{_genomic_}_scaffold_aculZ-supercont1.3_whole_genome_shotgun_sequence|gi|486835574|ref|NZ_KB822177.1|	2.216	97.784	28672	1265240	1293912
Staphylococcus_#_aureus_!_subsp._{_aureus_}_WBG10049_genomic_scaffold_supercont1.11_whole_genome_shotgun_sequence|gi|282911740|ref|NZ_GG730218.1|	2.751	97.249	28568	1009720	1038288
Staphylococcus_#_aureus_!_subsp._{_aureus_}_H19_genomic_scaffold_supercont1.2_whole_genome_shotgun_sequence|gi|283767263|ref|NZ_GG730336.1|	2.792	97.208	28482	991469	1019951
Staphylococcus_#_aureus_!_M1034_{_genomic_}_scaffold_acumn-supercont1.7_whole_genome_shotgun_sequence|gi|487391726|ref|NZ_KB821858.1|	3.205	96.795	28154	850185	878339
Staphylococcus_#_aureus_!_subsp._{_aureus_}_C160_genomic_scaffold_supercont1.2_whole_genome_shotgun_sequence|gi|282902071|ref|NZ_GG730274.1|	2.696	97.304	28084	1013740	1041824
Staphylococcus_#_aureus_!_subsp._{_aureus_}_Btn1260_genomic_scaffold_supercont1.14_whole_genome_shotgun_sequence|gi|282906513|ref|NZ_GG730269.1|	2.68	97.32	27554	1000625	1028179
Staphylococcus_#_haemolyticus_!_JCSC1435_{_chromosome_}_complete_genome|gi|70725001|ref|NC_007168.1|	1.015	98.985	27264	2657751	2685015
Staphylococcus_#_aureus_!_subsp._{_aureus_}_Btn1260_genomic_scaffold_supercont1.7_whole_genome_shotgun_sequence|gi|282905315|ref|NZ_GG730262.1|	2.672	97.328	27205	991082	1018287
Staphylococcus_#_aureus_!_M0408_{_genomic_}_scaffold_acrHk-supercont1.4_whole_genome_shotgun_sequence|gi|486296790|ref|NZ_KB821329.1|	2.425	97.575	26976	1085528	1112504
Staphylococcus_#_aureus_!_M0877_{_genomic_}_scaffold_acumt-supercont1.2_whole_genome_shotgun_sequence|gi|487385040|ref|NZ_KB821715.1|	2.519	97.481	26915	1041767	1068682
Staphylococcus_#_aureus_!_subsp._{_aureus_}_M876_genomic_scaffold_supercont1.2_whole_genome_shotgun_sequence|gi|257434580|ref|NZ_GG700615.1|	2.63	97.37	26697	988543	1015240
Staphylococcus_#_aureus_!_subsp._{_aureus_}_65-1322_genomic_scaffold_supercont1.2_whole_genome_shotgun_sequence|gi|257426332|ref|NZ_GG700560.1|	2.607	97.393	26597	993747	1020344
Staphylococcus_#_aureus_!_subsp._{_aureus_}_68-397_genomic_scaffold_supercont1.1_whole_genome_shotgun_sequence|gi|257428975|ref|NZ_GG700574.1|	2.624	97.376	26597	987043	1013640
Staphylococcus_#_aureus_!_subsp._{_aureus_}_58-424_genomic_scaffold_supercont1.3_whole_genome_shotgun_sequence|gi|293497427|ref|NZ_GG749056.1|	2.592	97.408	26575	998631	1025206
Staphylococcus_#_aureus_!_subsp._{_aureus_}_M1015_genomic_scaffold_supercont1.19_whole_genome_shotgun_sequence|gi|293549604|ref|NZ_GG749014.1|	2.594	97.406	26368	990275	1016643
Staphylococcus_#_aureus_!_M0877_{_genomic_}_scaffold_acumt-supercont1.5_whole_genome_shotgun_sequence|gi|487385357|ref|NZ_KB821718.1|	1.885	98.115	26197	1363364	1389561
Staphylococcus_#_aureus_!_subsp._{_aureus_}_C427_genomic_scaffold_supercont1.8_whole_genome_shotgun_sequence|gi|282918694|ref|NZ_GG730148.1|	2.618	97.382	26101	971009	997110
Staphylococcus_#_aureus_!_M1034_{_genomic_}_scaffold_acumn-supercont1.1_whole_genome_shotgun_sequence|gi|487391239|ref|NZ_KB821848.1|	2.499	97.501	25222	984014	1009236
Staphylococcus_#_aureus_!_subsp._{_aureus_}_C427_genomic_scaffold_supercont1.18_whole_genome_shotgun_sequence|gi|282920745|ref|NZ_GG730158.1|	2.485	97.515	24689	968965	993654
Staphylococcus_#_epidermidis_!_RP62A_{_complete_}_genome|gi|57865352|ref|NC_002976.3|	0.928	99.072	24294	2592236	2616530
Staphylococcus_#_aureus_!_subsp._{_aureus_}_MRSA131_genomic_scaffold_Scfld482_whole_genome_shotgun_sequence|gi|422747280|ref|NZ_GL638197.1|	12.451	87.549	24080	169312	193392
Staphylococcus_#_aureus_!_M0946_{_genomic_}_scaffold_acunJ-supercont1.6_whole_genome_shotgun_sequence|gi|487388144|ref|NZ_KB821791.1|	2.987	97.013	23788	772558	796346
Staphylococcus_#_aureus_!_subsp._{_aureus_}_EMRSA16_genomic_scaffold_supercont1.10_whole_genome_shotgun_sequence|gi|295427484|ref|NZ_GG770522.1|	2.996	97.004	23588	763769	787357
Staphylococcus_#_aureus_!_subsp._{_aureus_}_65-1322_genomic_scaffold_supercont1.6_whole_genome_shotgun_sequence|gi|257427710|ref|NZ_GG700564.1|	2.347	97.653	23585	981302	1004887
Staphylococcus_#_warneri_!_SG1_{_complete_}_genome|gi|445058371|ref|NC_020164.1|	0.915	99.085	22737	2463305	2486042
Staphylococcus_#_epidermidis_!_ATCC_{_12228_}_chromosome_complete_genome|gi|27466918|ref|NC_004461.1|	0.9	99.1	22486	2476793	2499279
Staphylococcus_#_aureus_!_subsp._{_aureus_}_MRSA177_genomic_scaffold_Scfld173_whole_genome_shotgun_sequence|gi|422743415|ref|NZ_GL638224.1|	7.18	92.82	22463	290408	312871
Staphylococcus_#_aureus_!_subsp._{_aureus_}_MRSA177_genomic_scaffold_Scfld582_whole_genome_shotgun_sequence|gi|422744652|ref|NZ_GL638246.1|	7.145	92.855	22288	289662	311950
Staphylococcus_#_aureus_!_M0326_{_genomic_}_scaffold_acrHf-supercont1.7_whole_genome_shotgun_sequence|gi|486269445|ref|NZ_KB821208.1|	24.423	75.577	22181	68639	90820
Staphylococcus_#_aureus_!_subsp._{_aureus_}_C160_genomic_scaffold_supercont1.7_whole_genome_shotgun_sequence|gi|282903541|ref|NZ_GG730279.1|	2.275	97.725	22176	952784	974960
Staphylococcus_#_aureus_!_subsp._{_aureus_}_58-424_genomic_scaffold_supercont1.6_whole_genome_shotgun_sequence|gi|293500395|ref|NZ_GG749059.1|	2.177	97.823	21923	985152	1007075
Staphylococcus_#_aureus_!_subsp._{_aureus_}_MRSA177_genomic_scaffold_Scfld252_whole_genome_shotgun_sequence|gi|422743901|ref|NZ_GL638230.1|	15.248	84.752	21919	121832	143751
Staphylococcus_#_aureus_!_M1064_{_genomic_}_scaffold_acumU-supercont1.3_whole_genome_shotgun_sequence|gi|486419946|ref|NZ_KB821939.1|	9.332	90.668	21544	209321	230865
Staphylococcus_#_aureus_!_subsp._{_aureus_}_A017934/97_genomic_scaffold_supercont1.9_whole_genome_shotgun_sequence|gi|283957738|ref|NZ_GG731503.1|	2.209	97.791	21542	953470	975012
Staphylococcus_#_aureus_!_subsp._{_aureus_}_TCH130_genomic_scaffold_SCAFFOLD2_whole_genome_shotgun_sequence|gi|255925764|ref|NZ_GG698159.1|	3.314	96.686	21039	613729	634768
Staphylococcus_#_aureus_!_subsp._{_aureus_}_M809_genomic_scaffold_supercont1.25_whole_genome_shotgun_sequence|gi|293511363|ref|NZ_GG749323.1|	3.622	96.378	20041	533279	553320
Staphylococcus_#_aureus_!_subsp._{_aureus_}_M899_genomic_scaffold_supercont1.2_whole_genome_shotgun_sequence|gi|282912717|ref|NZ_GG730191.1|	3.015	96.985	19705	633844	653549
Staphylococcus_#_aureus_!_subsp._{_aureus_}_C101_genomic_scaffold_supercont1.2_whole_genome_shotgun_sequence|gi|282922348|ref|NZ_GG730121.1|	2.978	97.022	19554	637093	656647
Staphylococcus_#_aureus_!_subsp._{_aureus_}_E1410_genomic_scaffold_supercont1.7_whole_genome_shotgun_sequence|gi|257433049|ref|NZ_GG700603.1|	1.942	98.058	19318	975565	994883
Staphylococcus_#_aureus_!_M0396_{_genomic_}_scaffold_acunf-supercont1.3_whole_genome_shotgun_sequence|gi|487367179|ref|NZ_KB821298.1|	4.634	95.366	19246	396041	415287
Staphylococcus_#_aureus_!_subsp._{_aureus_}_MRSA131_genomic_scaffold_Scfld179_whole_genome_shotgun_sequence|gi|422746581|ref|NZ_GL638183.1|	7.504	92.496	19172	236307	255479
Staphylococcus_#_aureus_!_M0494_{_genomic_}_scaffold_acqyb-supercont1.1_whole_genome_shotgun_sequence|gi|486320731|ref|NZ_KB821405.1|	0.622	99.378	17304	2765998	2783302
Staphylococcus_#_aureus_!_M0424_{_genomic_}_scaffold_acunn-supercont1.4_whole_genome_shotgun_sequence|gi|487368234|ref|NZ_KB821340.1|	5.768	94.232	17136	279947	297083
Staphylococcus_#_aureus_!_subsp._{_aureus_}_MRSA177_genomic_scaffold_Scfld14_whole_genome_shotgun_sequence|gi|422742133|ref|NZ_GL638200.1|	11.892	88.108	17063	126419	143482
Staphylococcus_#_aureus_!_M0633_{_genomic_}_scaffold_acyCm-supercont1.3_whole_genome_shotgun_sequence|gi|487371977|ref|NZ_KB821509.1|	5.614	94.386	16935	284718	301653
Staphylococcus_#_aureus_!_M0946_{_genomic_}_scaffold_acunJ-supercont1.3_whole_genome_shotgun_sequence|gi|487387957|ref|NZ_KB821788.1|	2.697	97.303	16802	606228	623030
Staphylococcus_#_aureus_!_M1373_{_genomic_}_scaffold_acumD-supercont1.6_whole_genome_shotgun_sequence|gi|488719299|ref|NZ_KB822215.1|	21.65	78.35	16748	60610	77358
Staphylococcus_#_aureus_!_subsp._{_aureus_}_MRSA131_genomic_scaffold_Scfld153_whole_genome_shotgun_sequence|gi|422746362|ref|NZ_GL638182.1|	8.096	91.904	16591	188337	204928
Staphylococcus_#_pseudintermedius_!_HKU10-03_{_chromosome_}_complete_genome|gi|319891290|ref|NC_014925.1|	0.633	99.367	16555	2600826	2617381
Staphylococcus_#_aureus_!_M0035_{_genomic_}_scaffold_acqxl-supercont1.2_whole_genome_shotgun_sequence|gi|486228657|ref|NZ_KB820966.1|	0.569	99.431	16273	2844522	2860795
Staphylococcus_#_aureus_!_M0695_{_genomic_}_scaffold_acunx-supercont1.3_whole_genome_shotgun_sequence|gi|489044994|ref|NZ_KB821608.1|	35.067	64.933	15868	29382	45250
Staphylococcus_#_aureus_!_subsp._{_aureus_}_WBG10049_genomic_scaffold_supercont1.5_whole_genome_shotgun_sequence|gi|282910944|ref|NZ_GG730212.1|	2.679	97.321	15768	572798	588566
Bacillus_#_thuringiensis_!_BMB171_{_chromosome_}_complete_genome|gi|296500838|ref|NC_014171.1|	0.293	99.707	15621	5314467	5330088
Staphylococcus_#_lugdunensis_!_HKU09-01_{_chromosome_}_complete_genome|gi|289549371|ref|NC_013893.1|	0.58	99.42	15429	2642937	2658366
Staphylococcus_#_aureus_!_subsp._{_aureus_}_TCH130_genomic_scaffold_SCAFFOLD3_whole_genome_shotgun_sequence|gi|255925765|ref|NZ_GG698160.1|	3.686	96.314	15415	402793	418208
Staphylococcus_#_aureus_!_M1367_{_genomic_}_scaffold_acumK-supercont1.2_whole_genome_shotgun_sequence|gi|487027023|ref|NZ_KB822208.1|	0.534	99.466	15342	2859114	2874456
Staphylococcus_#_aureus_!_M0363_{_genomic_}_scaffold_acunN-supercont1.2_whole_genome_shotgun_sequence|gi|487364822|ref|NZ_KB821272.1|	0.538	99.462	15331	2832141	2847472
Staphylococcus_#_aureus_!_M1253_{_genomic_}_scaffold_acunj-supercont1.1_whole_genome_shotgun_sequence|gi|486669659|ref|NZ_KB822112.1|	0.53	99.47	15286	2868178	2883464
Staphylococcus_#_aureus_!_M0306_{_genomic_}_scaffold_acunR-supercont1.1_whole_genome_shotgun_sequence|gi|487363159|ref|NZ_KB821198.1|	0.529	99.471	15195	2858811	2874006
Bacillus_#_thuringiensis_!_MC28_{_chromosome_}_complete_genome|gi|407703236|ref|NC_018693.1|	0.28	99.72	15143	5399351	5414494
Bacillus_#_cereus_!_B4264_{_chromosome_}_complete_genome|gi|218230750|ref|NC_011725.1|	0.273	99.727	14770	5404266	5419036
Bacillus_#_thuringiensis_!_HD-789_{_complete_}_genome|gi|434373506|ref|NC_018508.1|	0.269	99.731	14770	5480508	5495278
Bacillus_#_thuringiensis_!_Bt407_{_chromosome_}_complete_genome|gi|409187965|ref|NC_018877.1|	0.268	99.732	14742	5485759	5500501
Staphylococcus_#_aureus_!_subsp._{_aureus_}_MRSA177_genomic_scaffold_Scfld68_whole_genome_shotgun_sequence|gi|422743148|ref|NZ_GL638216.1|	9.225	90.775	14646	144123	158769
Bacillus_#_thuringiensis_!_str._{_Al_}_Hakam_chromosome_complete_genome|gi|118475778|ref|NC_008600.1|	0.278	99.722	14597	5242494	5257091
Bacillus_#_cereus_!_AH187_{_chromosome_}_complete_genome|gi|217957581|ref|NC_011658.1|	0.277	99.723	14574	5254456	5269030
Staphylococcus_#_aureus_!_subsp._{_aureus_}_D139_genomic_scaffold_supercont1.17_whole_genome_shotgun_sequence|gi|282916507|ref|NZ_GG730175.1|	2.091	97.909	14574	682299	696873
Bacillus_#_cereus_!_NC7401_{_complete_}_genome|gi|375282101|ref|NC_016771.1|	0.276	99.724	14406	5207175	5221581
Staphylococcus_#_aureus_!_M0536_{_genomic_}_scaffold_acvqu-supercont1.3_whole_genome_shotgun_sequence|gi|486345866|ref|NZ_KB821468.1|	0.646	99.354	14065	2161746	2175811
Staphylococcus_#_pseudintermedius_!_ED99_{_chromosome_}_complete_genome|gi|386318029|ref|NC_017568.1|	0.543	99.457	13973	2558243	2572216
Staphylococcus_#_aureus_!_subsp._{_aureus_}_MRSA177_genomic_scaffold_Scfld209_whole_genome_shotgun_sequence|gi|422743733|ref|NZ_GL638226.1|	12.365	87.635	13877	98348	112225
Staphylococcus_#_aureus_!_subsp._{_aureus_}_MRSA177_genomic_scaffold_Scfld42_whole_genome_shotgun_sequence|gi|422742527|ref|NZ_GL638205.1|	6.861	93.139	13826	187692	201518
Bacillus_#_cereus_!_G9842_{_chromosome_}_complete_genome|gi|218895141|ref|NC_011772.1|	0.252	99.748	13600	5373734	5387334
Staphylococcus_#_epidermidis_!_M0881_{_genomic_}_scaffold_acumm-supercont1.6_whole_genome_shotgun_sequence|gi|489048088|ref|NZ_KB821726.1|	1.322	98.678	13285	991929	1005214
Staphylococcus_#_aureus_!_subsp._{_aureus_}_MRSA131_genomic_scaffold_Scfld55_whole_genome_shotgun_sequence|gi|422745238|ref|NZ_GL638171.1|	9.877	90.123	13253	120924	134177
Staphylococcus_#_aureus_!_subsp._{_aureus_}_MRSA131_genomic_scaffold_Scfld52_whole_genome_shotgun_sequence|gi|422745115|ref|NZ_GL638170.1|	8.881	91.119	13146	134876	148022
Bacillus_#_weihenstephanensis_!_KBAB4_{_chromosome_}_complete_genome|gi|163938013|ref|NC_010184.1|	0.247	99.753	12978	5249797	5262775
Staphylococcus_#_aureus_!_subsp._{_aureus_}_MRSA177_genomic_scaffold_Scfld389_whole_genome_shotgun_sequence|gi|422744368|ref|NZ_GL638237.1|	8.727	91.273	12928	135208	148136
Staphylococcus_#_aureus_!_subsp._{_aureus_}_MRSA131_genomic_scaffold_Scfld253_whole_genome_shotgun_sequence|gi|422747121|ref|NZ_GL638191.1|	14.47	85.53	12826	75814	88640
Staphylococcus_#_aureus_!_M1520_{_genomic_}_scaffold_acunp-supercont1.1_whole_genome_shotgun_sequence|gi|487137167|ref|NZ_KB822266.1|	0.454	99.546	12784	2806030	2818814
Staphylococcus_#_carnosus_!_subsp._{_carnosus_}_TM300_chromosome_complete_genome|gi|224475494|ref|NC_012121.1|	0.498	99.502	12781	2553643	2566424
Staphylococcus_#_aureus_!_M0586_{_genomic_}_scaffold_acunQ-supercont1.1_whole_genome_shotgun_sequence|gi|487371607|ref|NZ_KB821500.1|	0.436	99.564	12773	2915251	2928024
Bacillus_#_megaterium_!_DSM_{_319_}_chromosome_complete_genome|gi|295702242|ref|NC_014103.1|	0.249	99.751	12705	5084742	5097447
Staphylococcus_#_aureus_!_M1199_{_genomic_}_scaffold_acunF-supercont1.1_whole_genome_shotgun_sequence|gi|486447954|ref|NZ_KB822062.1|	0.544	99.456	12638	2309899	2322537
Staphylococcus_#_aureus_!_subsp._{_aureus_}_M876_genomic_scaffold_supercont1.6_whole_genome_shotgun_sequence|gi|257435946|ref|NZ_GG700619.1|	2.183	97.817	12552	562332	574884
Staphylococcus_#_aureus_!_subsp._{_aureus_}_EMRSA16_genomic_scaffold_supercont1.20_whole_genome_shotgun_sequence|gi|295428968|ref|NZ_GG770532.1|	3.04	96.96	12534	399794	412328
Staphylococcus_#_aureus_!_M0279_{_genomic_}_scaffold_acqxn-supercont1.2_whole_genome_shotgun_sequence|gi|487375990|ref|NZ_KB821175.1|	0.717	99.283	12466	1726049	1738515
Staphylococcus_#_aureus_!_subsp._{_aureus_}_MRSA177_genomic_scaffold_Scfld320_whole_genome_shotgun_sequence|gi|422744062|ref|NZ_GL638233.1|	8.673	91.327	12292	129430	141722
Staphylococcus_#_aureus_!_subsp._{_aureus_}_EMRSA16_genomic_scaffold_supercont1.3_whole_genome_shotgun_sequence|gi|295426606|ref|NZ_GG770515.1|	2.692	97.308	12226	442007	454233
Staphylococcus_#_aureus_!_M0350_{_genomic_}_scaffold_acunH-supercont1.2_whole_genome_shotgun_sequence|gi|487364069|ref|NZ_KB821251.1|	0.445	99.555	12058	2699296	2711354
Staphylococcus_#_aureus_!_M1170_{_genomic_}_scaffold_acume-supercont1.1_whole_genome_shotgun_sequence|gi|486434630|ref|NZ_KB822067.1|	0.419	99.581	12024	2859225	2871249
Staphylococcus_#_aureus_!_M0946_{_genomic_}_scaffold_acunJ-supercont1.2_whole_genome_shotgun_sequence|gi|487387889|ref|NZ_KB821787.1|	2.602	97.398	11928	446560	458488
Bacillus_#_cereus_!_biovar_{_anthracis_}_str._CI_chromosome_complete_genome|gi|301051741|ref|NC_014335.1|	0.229	99.771	11912	5184142	5196054
Staphylococcus_#_aureus_!_subsp._{_aureus_}_M899_genomic_scaffold_supercont1.7_whole_genome_shotgun_sequence|gi|282913769|ref|NZ_GG730196.1|	2.057	97.943	11850	564273	576123
Staphylococcus_#_lugdunensis_!_N920143_{_complete_}_genome|gi|385782956|ref|NC_017353.1|	0.453	99.547	11761	2584127	2595888
Staphylococcus_#_aureus_!_M0571_{_genomic_}_scaffold_acumO-supercont1.2_whole_genome_shotgun_sequence|gi|487370688|ref|NZ_KB821477.1|	0.405	99.595	11739	2888016	2899755
Staphylococcus_#_aureus_!_M0844_{_genomic_}_scaffold_acvqL-supercont1.2_whole_genome_shotgun_sequence|gi|486385588|ref|NZ_KB821711.1|	0.475	99.525	11637	2439822	2451459
Staphylococcus_#_aureus_!_subsp._{_aureus_}_68-397_genomic_scaffold_supercont1.6_whole_genome_shotgun_sequence|gi|257430345|ref|NZ_GG700579.1|	2.005	97.995	11622	568000	579622
Staphylococcus_#_aureus_!_M0944_{_genomic_}_scaffold_acvqy-supercont1.1_whole_genome_shotgun_sequence|gi|486393915|ref|NZ_KB821779.1|	0.712	99.288	11620	1620109	1631729
Bacillus_#_sp._!_1NLA3E_{_complete_}_genome|gi|488570484|ref|NC_021171.1|	0.239	99.761	11504	4804098	4815602
Bacillus_#_megaterium_!_QM_{_B1551_}_chromosome_complete_genome|gi|294496875|ref|NC_014019.1|	0.226	99.774	11501	5085628	5097129
Solibacillus_#_silvestris_!_StLB046_{_complete_}_genome|gi|393198727|ref|NC_018065.1|	0.285	99.715	11298	3958029	3969327
Staphylococcus_#_aureus_!_subsp._{_aureus_}_MRSA177_genomic_scaffold_Scfld384_whole_genome_shotgun_sequence|gi|422744230|ref|NZ_GL638236.1|	9.457	90.543	11178	107015	118193
Staphylococcus_#_saprophyticus_!_subsp._{_saprophyticus_}_ATCC_15305_complete_genome|gi|73661309|ref|NC_007350.1|	0.444	99.556	11165	2505410	2516575
Bacillus_#_anthracis_!_str._{_A0248_}_complete_genome|gi|229599883|ref|NC_012659.1|	0.213	99.787	11147	5216272	5227419
Bacillus_#_anthracis_!_str._{_CDC_}_684_chromosome_complete_genome|gi|227812678|ref|NC_012581.1|	0.213	99.787	11145	5218970	5230115
Bacillus_#_cereus_!_AH820_{_chromosome_}_complete_genome|gi|218901206|ref|NC_011773.1|	0.21	99.79	11112	5291571	5302683
Staphylococcus_#_aureus_!_M0964_{_genomic_}_scaffold_aculV-supercont1.5_whole_genome_shotgun_sequence|gi|487388602|ref|NZ_KB821805.1|	0.869	99.131	10945	1249206	1260151
Staphylococcus_#_aureus_!_M0455_{_genomic_}_scaffold_acqxx-supercont1.1_whole_genome_shotgun_sequence|gi|487379684|ref|NZ_KB821355.1|	0.401	99.599	10943	2715697	2726640
Staphylococcus_#_aureus_!_subsp._{_aureus_}_C101_genomic_scaffold_supercont1.8_whole_genome_shotgun_sequence|gi|282923802|ref|NZ_GG730127.1|	3.038	96.962	10920	348527	359447
Staphylococcus_#_aureus_!_M0687_{_genomic_}_scaffold_acvqC-supercont1.5_whole_genome_shotgun_sequence|gi|486366366|ref|NZ_KB821581.1|	0.763	99.237	10895	1417612	1428507
Staphylococcus_#_aureus_!_M0029_{_genomic_}_scaffold_acqwZ-supercont1.2_whole_genome_shotgun_sequence|gi|486225786|ref|NZ_KB820963.1|	0.379	99.621	10848	2852331	2863179
Staphylococcus_#_aureus_!_M0792_{_genomic_}_scaffold_acuni-supercont1.8_whole_genome_shotgun_sequence|gi|487383273|ref|NZ_KB821678.1|	0.603	99.397	10792	1779801	1790593
Staphylococcus_#_aureus_!_M1311_{_genomic_}_scaffold_aculZ-supercont1.6_whole_genome_shotgun_sequence|gi|486856699|ref|NZ_KB822180.1|	1.966	98.034	10789	537993	548782
Staphylococcus_#_aureus_!_M0489_{_genomic_}_scaffold_acsPG-supercont1.8_whole_genome_shotgun_sequence|gi|486318205|ref|NZ_KB821399.1|	0.846	99.154	10746	1259585	1270331
Staphylococcus_#_aureus_!_M0250_{_genomic_}_scaffold_acuma-supercont1.1_whole_genome_shotgun_sequence|gi|487362212|ref|NZ_KB821141.1|	0.373	99.627	10685	2857642	2868327
Staphylococcus_#_aureus_!_subsp._{_aureus_}_WW2703/97_genomic_scaffold_supercont1.13_whole_genome_shotgun_sequence|gi|282908001|ref|NZ_GG730232.1|	2.213	97.787	10589	467802	478391
Lysinibacillus_#_sphaericus_!_C3-41_{_chromosome_}_complete_genome|gi|169825618|ref|NC_010382.1|	0.227	99.773	10520	4629301	4639821
Staphylococcus_#_aureus_!_subsp._{_aureus_}_D139_genomic_scaffold_supercont1.25_whole_genome_shotgun_sequence|gi|282917720|ref|NZ_GG730183.1|	2.437	97.563	10496	420196	430692
Staphylococcus_#_aureus_!_M1034_{_genomic_}_scaffold_acumn-supercont1.8_whole_genome_shotgun_sequence|gi|487391857|ref|NZ_KB821859.1|	2.027	97.973	10495	507296	517791
Staphylococcus_#_aureus_!_M0077_{_genomic_}_scaffold_acunP-supercont1.2_whole_genome_shotgun_sequence|gi|487350114|ref|NZ_KB821000.1|	0.855	99.145	10464	1213197	1223661
Staphylococcus_#_aureus_!_subsp._{_aureus_}_USA300_TCH959_genomic_scaffold_SCAFFOLD3_whole_genome_shotgun_sequence|gi|255926319|ref|NZ_GG697987.1|	5.701	94.299	10427	172463	182890
Staphylococcus_#_aureus_!_M1060_{_genomic_}_scaffold_acunt-supercont1.1_whole_genome_shotgun_sequence|gi|487400592|ref|NZ_KB822368.1|	0.439	99.561	10347	2345711	2356058
Staphylococcus_#_aureus_!_subsp._{_aureus_}_E1410_genomic_scaffold_supercont1.5_whole_genome_shotgun_sequence|gi|257432636|ref|NZ_GG700601.1|	2.389	97.611	10274	419791	430065
Staphylococcus_#_aureus_!_subsp._{_aureus_}_M876_genomic_scaffold_supercont1.5_whole_genome_shotgun_sequence|gi|257435540|ref|NZ_GG700618.1|	2.409	97.591	10274	416246	426520
Staphylococcus_#_aureus_!_M0340_{_genomic_}_scaffold_acqxN-supercont1.3_whole_genome_shotgun_sequence|gi|486281296|ref|NZ_KB821243.1|	5.707	94.293	10268	169646	179914
Staphylococcus_#_aureus_!_M1466_{_genomic_}_scaffold_acumV-supercont1.7_whole_genome_shotgun_sequence|gi|487401900|ref|NZ_KB822399.1|	0.808	99.192	10245	1257199	1267444
Staphylococcus_#_aureus_!_subsp._{_aureus_}_WBG10049_genomic_scaffold_supercont1.3_whole_genome_shotgun_sequence|gi|282910157|ref|NZ_GG730210.1|	2.354	97.646	10174	422085	432259
Staphylococcus_#_aureus_!_M0334_{_genomic_}_scaffold_acumz-supercont1.4_whole_genome_shotgun_sequence|gi|487363716|ref|NZ_KB821237.1|	0.665	99.335	10163	1518613	1528776
Staphylococcus_#_aureus_!_M0367_{_genomic_}_scaffold_acunU-supercont1.3_whole_genome_shotgun_sequence|gi|487365191|ref|NZ_KB821276.1|	0.352	99.648	10136	2865818	2875954
Staphylococcus_#_aureus_!_subsp._{_aureus_}_MRSA131_genomic_scaffold_Scfld228_whole_genome_shotgun_sequence|gi|422746915|ref|NZ_GL638189.1|	5.851	94.149	10105	162599	172704
Staphylococcus_#_aureus_!_subsp._{_aureus_}_WW2703/97_genomic_scaffold_supercont1.26_whole_genome_shotgun_sequence|gi|282908680|ref|NZ_GG730245.1|	1.816	98.184	10102	546032	556134
Staphylococcus_#_aureus_!_subsp._{_aureus_}_65-1322_genomic_scaffold_supercont1.5_whole_genome_shotgun_sequence|gi|257427298|ref|NZ_GG700563.1|	2.354	97.646	10074	417966	428040
Staphylococcus_#_aureus_!_M0006_{_genomic_}_scaffold_aculO-supercont1.8_whole_genome_shotgun_sequence|gi|487267757|ref|NZ_KB820960.1|	1.048	98.952	10069	950681	960750
Staphylococcus_#_aureus_!_M1064_{_genomic_}_scaffold_acumU-supercont1.7_whole_genome_shotgun_sequence|gi|486421041|ref|NZ_KB821943.1|	5.654	94.346	10068	168003	178071
Bacillus_#_megaterium_!_WSH-002_{_chromosome_}_complete_genome|gi|384044176|ref|NC_017138.1|	0.202	99.798	10054	4973921	4983975
Staphylococcus_#_aureus_!_M1076_{_genomic_}_scaffold_acumq-supercont1.1_whole_genome_shotgun_sequence|gi|486417634|ref|NZ_KB821951.1|	0.673	99.327	10045	1483515	1493560
Staphylococcus_#_aureus_!_M0200_{_genomic_}_scaffold_acumC-supercont1.6_whole_genome_shotgun_sequence|gi|487360555|ref|NZ_KB821101.1|	0.821	99.179	10040	1213229	1223269
Staphylococcus_#_aureus_!_M0171_{_genomic_}_scaffold_acqwu-supercont1.5_whole_genome_shotgun_sequence|gi|487372978|ref|NZ_KB821065.1|	0.659	99.341	10026	1510870	1520896
Staphylococcus_#_aureus_!_M1061_{_genomic_}_scaffold_aculN-supercont1.5_whole_genome_shotgun_sequence|gi|487393551|ref|NZ_KB821896.1|	21.006	78.994	9986	37553	47539
Staphylococcus_#_aureus_!_subsp._{_aureus_}_55/2053_genomic_scaffold_supercont1.3_whole_genome_shotgun_sequence|gi|257424630|ref|NZ_GG700535.1|	2.338	97.662	9974	416682	426656
Staphylococcus_#_aureus_!_M0648_{_genomic_}_scaffold_acunl-supercont1.6_whole_genome_shotgun_sequence|gi|487381205|ref|NZ_KB821527.1|	1.584	98.416	9956	618535	628491
Staphylococcus_#_aureus_!_M0646_{_genomic_}_scaffold_acuoa-supercont1.6_whole_genome_shotgun_sequence|gi|487380761|ref|NZ_KB821517.1|	0.79	99.21	9945	1249609	1259554
Staphylococcus_#_aureus_!_M1255_{_genomic_}_scaffold_acunA-supercont1.3_whole_genome_shotgun_sequence|gi|486684463|ref|NZ_KB822118.1|	0.783	99.217	9886	1252757	1262643
Staphylococcus_#_aureus_!_M1510_{_genomic_}_scaffold_aculM-supercont1.2_whole_genome_shotgun_sequence|gi|487399506|ref|NZ_KB822258.1|	0.761	99.239	9849	1283774	1293623
Staphylococcus_#_aureus_!_subsp._{_aureus_}_M1015_genomic_scaffold_supercont1.4_whole_genome_shotgun_sequence|gi|293523927|ref|NZ_GG748999.1|	2.455	97.545	9771	388215	397986
Staphylococcus_#_aureus_!_M1309_{_genomic_}_scaffold_acunC-supercont1.3_whole_genome_shotgun_sequence|gi|487398415|ref|NZ_KB822158.1|	0.794	99.206	9760	1219765	1229525
Staphylococcus_#_aureus_!_M0823_{_genomic_}_scaffold_acvqk-supercont1.6_whole_genome_shotgun_sequence|gi|486383324|ref|NZ_KB821696.1|	1.049	98.951	9756	920540	930296
Staphylococcus_#_aureus_!_M0294_{_genomic_}_scaffold_acumG-supercont1.7_whole_genome_shotgun_sequence|gi|487400143|ref|NZ_KB822359.1|	1.276	98.724	9745	754060	763805
Staphylococcus_#_aureus_!_subsp._{_aureus_}_M899_genomic_scaffold_supercont1.5_whole_genome_shotgun_sequence|gi|282913349|ref|NZ_GG730194.1|	2.435	97.565	9671	387449	397120
Staphylococcus_#_aureus_!_subsp._{_aureus_}_TCH130_genomic_scaffold_SCAFFOLD4_whole_genome_shotgun_sequence|gi|255925766|ref|NZ_GG698161.1|	4.756	95.244	9664	193544	203208
Staphylococcus_#_aureus_!_subsp._{_aureus_}_C160_genomic_scaffold_supercont1.4_whole_genome_shotgun_sequence|gi|282903104|ref|NZ_GG730276.1|	2.195	97.805	9574	426673	436247
Staphylococcus_#_aureus_!_subsp._{_aureus_}_C101_genomic_scaffold_supercont1.6_whole_genome_shotgun_sequence|gi|282923265|ref|NZ_GG730125.1|	2.407	97.593	9572	388146	397718
Staphylococcus_#_aureus_!_subsp._{_aureus_}_C427_genomic_scaffold_supercont1.6_whole_genome_shotgun_sequence|gi|282918303|ref|NZ_GG730146.1|	2.382	97.618	9571	392248	401819
Staphylococcus_#_aureus_!_M0280_{_genomic_}_scaffold_acunT-supercont1.6_whole_genome_shotgun_sequence|gi|487362590|ref|NZ_KB821186.1|	1.027	98.973	9555	921140	930695
Staphylococcus_#_aureus_!_M0103_{_genomic_}_scaffold_acqxd-supercont1.4_whole_genome_shotgun_sequence|gi|486246367|ref|NZ_KB821017.1|	0.781	99.219	9546	1212816	1222362
Staphylococcus_#_aureus_!_subsp._{_aureus_}_A017934/97_genomic_scaffold_supercont1.7_whole_genome_shotgun_sequence|gi|283957314|ref|NZ_GG731501.1|	2.16	97.84	9537	431934	441471
Staphylococcus_#_aureus_!_M0660_{_genomic_}_scaffold_acumg-supercont1.10_whole_genome_shotgun_sequence|gi|487381382|ref|NZ_KB821532.1|	1.521	98.479	9498	614887	624385
Staphylococcus_#_aureus_!_M0104_{_genomic_}_scaffold_acrHp-supercont1.7_whole_genome_shotgun_sequence|gi|487372667|ref|NZ_KB821030.1|	1.543	98.457	9457	603442	612899
Staphylococcus_#_aureus_!_M0692_{_genomic_}_scaffold_acvqM-supercont1.8_whole_genome_shotgun_sequence|gi|486369751|ref|NZ_KB821594.1|	0.92	99.08	9457	1018727	1028184
Staphylococcus_#_aureus_!_M1119_{_genomic_}_scaffold_acunS-supercont1.5_whole_genome_shotgun_sequence|gi|486431063|ref|NZ_KB822029.1|	1.458	98.542	9457	639170	648627
Staphylococcus_#_aureus_!_M0900_{_genomic_}_scaffold_acunz-supercont1.6_whole_genome_shotgun_sequence|gi|487386371|ref|NZ_KB821744.1|	1.355	98.645	9456	688201	697657
Bacillus_#_subtilis_!_subsp._{_subtilis_}_str._168_chromosome_complete_genome|gi|255767013|ref|NC_000964.3|	0.224	99.776	9425	4206181	4215606
Staphylococcus_#_aureus_!_M0602_{_genomic_}_scaffold_acvqp-supercont1.4_whole_genome_shotgun_sequence|gi|486359560|ref|NZ_KB821496.1|	1.816	98.184	9385	507416	516801
Staphylococcus_#_aureus_!_M0584_{_genomic_}_scaffold_acunu-supercont1.2_whole_genome_shotgun_sequence|gi|487370984|ref|NZ_KB821490.1|	0.772	99.228	9366	1204449	1213815
Staphylococcus_#_aureus_!_M0288_{_genomic_}_scaffold_acqwg-supercont1.1_whole_genome_shotgun_sequence|gi|487376330|ref|NZ_KB821190.1|	0.761	99.239	9363	1221688	1231051
Staphylococcus_#_aureus_!_M0144_{_genomic_}_scaffold_acunq-supercont1.3_whole_genome_shotgun_sequence|gi|487359205|ref|NZ_KB821040.1|	1.009	98.991	9357	917635	926992
Staphylococcus_#_aureus_!_M1103_{_genomic_}_scaffold_acump-supercont1.5_whole_genome_shotgun_sequence|gi|486429182|ref|NZ_KB822038.1|	1.004	98.996	9356	922819	932175
Staphylococcus_#_aureus_!_M1565_{_genomic_}_scaffold_acunk-supercont1.2_whole_genome_shotgun_sequence|gi|487189945|ref|NZ_KB822300.1|	1.493	98.507	9356	617196	626552
Bacillus_#_subtilis_!_subsp._{_natto_}_BEST195_complete_genome_***_SEQUENCING_IN_PROGRESS_***|gi|428277412|ref|NC_017196.1|	0.228	99.772	9334	4082257	4091591
Staphylococcus_#_aureus_!_M0934_{_genomic_}_scaffold_acvqs-supercont1.2_whole_genome_shotgun_sequence|gi|486388784|ref|NZ_KB821761.1|	1.321	98.679	9284	693578	702862
Staphylococcus_#_aureus_!_M0539_{_genomic_}_scaffold_acvqn-supercont1.11_whole_genome_shotgun_sequence|gi|486347448|ref|NZ_KB821452.1|	1.484	98.516	9256	614504	623760
Staphylococcus_#_aureus_!_M1063_{_genomic_}_scaffold_acumZ-supercont1.8_whole_genome_shotgun_sequence|gi|486416926|ref|NZ_KB821910.1|	1.349	98.651	9158	669518	678676
Staphylococcus_#_aureus_!_M0328_{_genomic_}_scaffold_acrGR-supercont1.3_whole_genome_shotgun_sequence|gi|486272254|ref|NZ_KB821213.1|	1.417	98.583	9156	637064	646220
Bacillus_#_amyloliquefaciens_!_DSM_{_7_}_complete_genome|gi|308171891|ref|NC_014551.1|	0.229	99.771	9109	3971090	3980199
Staphylococcus_#_aureus_!_M0547_{_genomic_}_scaffold_acvqJ-supercont1.5_whole_genome_shotgun_sequence|gi|486352271|ref|NZ_KB821446.1|	1.44	98.56	9057	619708	628765
Staphylococcus_#_aureus_!_M0375_{_genomic_}_scaffold_acunY-supercont1.6_whole_genome_shotgun_sequence|gi|487366006|ref|NZ_KB821292.1|	1.449	98.551	9055	615990	625045
Staphylococcus_#_epidermidis_!_BCM-HMP0060_{_genomic_}_scaffold_SCAFFOLD1_whole_genome_shotgun_sequence|gi|254281370|ref|NZ_GG696727.1|	0.985	99.015	8945	899194	908139
Staphylococcus_#_aureus_!_subsp._{_aureus_}_M1015_genomic_scaffold_supercont1.6_whole_genome_shotgun_sequence|gi|293526348|ref|NZ_GG749001.1|	1.9	98.1	8935	461346	470281
Staphylococcus_#_aureus_!_M1311_{_genomic_}_scaffold_aculZ-supercont1.5_whole_genome_shotgun_sequence|gi|486843581|ref|NZ_KB822179.1|	1.526	98.474	8893	574023	582916
Staphylococcus_#_aureus_!_M0994_{_genomic_}_scaffold_acunc-supercont1.2_whole_genome_shotgun_sequence|gi|487390609|ref|NZ_KB821810.1|	0.754	99.246	8871	1167140	1176011
Staphylococcus_#_aureus_!_M0415_{_genomic_}_scaffold_acrGP-supercont1.4_whole_genome_shotgun_sequence|gi|487379243|ref|NZ_KB821320.1|	1.869	98.131	8856	464858	473714
Staphylococcus_#_aureus_!_subsp._{_aureus_}_58-424_genomic_scaffold_supercont1.10_whole_genome_shotgun_sequence|gi|293503318|ref|NZ_GG749063.1|	2.072	97.928	8834	417458	426292
Staphylococcus_#_aureus_!_subsp._{_aureus_}_MRSA177_genomic_scaffold_Scfld22_whole_genome_shotgun_sequence|gi|422742404|ref|NZ_GL638203.1|	10.076	89.924	8829	78792	87621
Staphylococcus_#_aureus_!_subsp._{_aureus_}_M876_genomic_scaffold_supercont1.9_whole_genome_shotgun_sequence|gi|257436456|ref|NZ_GG700622.1|	2.092	97.908	8826	413072	421898
Staphylococcus_#_aureus_!_M0663_{_genomic_}_scaffold_acuoc-supercont1.6_whole_genome_shotgun_sequence|gi|487382141|ref|NZ_KB821557.1|	1.401	98.599	8756	616018	624774
Staphylococcus_#_aureus_!_M1321_{_genomic_}_scaffold_acunh-supercont1.6_whole_genome_shotgun_sequence|gi|486924102|ref|NZ_KB822196.1|	1.366	98.634	8754	632205	640959
Staphylococcus_#_aureus_!_M0892_{_genomic_}_scaffold_aculW-supercont1.3_whole_genome_shotgun_sequence|gi|487385673|ref|NZ_KB821732.1|	0.712	99.288	8732	1217830	1226562
Staphylococcus_#_aureus_!_subsp._{_aureus_}_55/2053_genomic_scaffold_supercont1.6_whole_genome_shotgun_sequence|gi|257425560|ref|NZ_GG700538.1|	2.086	97.914	8726	409595	418321
Staphylococcus_#_aureus_!_subsp._{_aureus_}_M899_genomic_scaffold_supercont1.8_whole_genome_shotgun_sequence|gi|282914286|ref|NZ_GG730197.1|	2.232	97.768	8726	382296	391022
Staphylococcus_#_aureus_!_M0799_{_genomic_}_scaffold_acvqq-supercont1.7_whole_genome_shotgun_sequence|gi|486380307|ref|NZ_KB821659.1|	1.281	98.719	8656	667320	675976
Staphylococcus_#_aureus_!_subsp._{_aureus_}_WW2703/97_genomic_scaffold_supercont1.35_whole_genome_shotgun_sequence|gi|282909609|ref|NZ_GG730254.1|	2.446	97.554	8645	344770	353415
Staphylococcus_#_aureus_!_M0478_{_genomic_}_scaffold_acrGZ-supercont1.5_whole_genome_shotgun_sequence|gi|486313128|ref|NZ_KB821380.1|	0.949	99.051	8619	899399	908018
Staphylococcus_#_aureus_!_M0510_{_genomic_}_scaffold_acumF-supercont1.3_whole_genome_shotgun_sequence|gi|487369026|ref|NZ_KB821409.1|	0.636	99.364	8415	1314592	1323007
Staphylococcus_#_aureus_!_subsp._{_aureus_}_WW2703/97_genomic_scaffold_supercont1.2_whole_genome_shotgun_sequence|gi|282907462|ref|NZ_GG730221.1|	2.593	97.407	8393	315310	323703
Staphylococcus_#_aureus_!_M1109_{_genomic_}_scaffold_acunD-supercont1.9_whole_genome_shotgun_sequence|gi|487395760|ref|NZ_KB822020.1|	17.475	82.525	8355	39456	47811
Staphylococcus_#_lugdunensis_!_ACS-027-V-Sch2_{_genomic_}_scaffold_supercont1.1_whole_genome_shotgun_sequence|gi|448879133|ref|NZ_KB373322.1|	0.468	99.532	8256	1756492	1764748
Staphylococcus_#_aureus_!_subsp._{_aureus_}_MRSA177_genomic_scaffold_Scfld406_whole_genome_shotgun_sequence|gi|422744525|ref|NZ_GL638239.1|	10.95	89.05	8242	67027	75269
Staphylococcus_#_aureus_!_M0946_{_genomic_}_scaffold_acunJ-supercont1.4_whole_genome_shotgun_sequence|gi|487388014|ref|NZ_KB821789.1|	2.613	97.387	8237	306976	315213
Staphylococcus_#_aureus_!_M1521_{_genomic_}_scaffold_acunr-supercont1.4_whole_genome_shotgun_sequence|gi|487137439|ref|NZ_KB822271.1|	1.312	98.688	8220	618231	626451
Staphylococcus_#_sp._!_HGB0015_{_genomic_}_scaffold_aczIz-supercont1.2_whole_genome_shotgun_sequence|gi|512478261|ref|NZ_KE150418.1|	0.8	99.2	8052	998198	1006250
Staphylococcus_#_aureus_!_subsp._{_aureus_}_WBG10049_genomic_scaffold_supercont1.4_whole_genome_shotgun_sequence|gi|282910573|ref|NZ_GG730211.1|	1.968	98.032	8046	400707	408753
Staphylococcus_#_aureus_!_M0404_{_genomic_}_scaffold_acrGQ-supercont1.4_whole_genome_shotgun_sequence|gi|487378778|ref|NZ_KB821305.1|	0.769	99.231	8043	1038360	1046403
Staphylococcus_#_aureus_!_subsp._{_aureus_}_55/2053_genomic_scaffold_supercont1.5_whole_genome_shotgun_sequence|gi|257425216|ref|NZ_GG700537.1|	2.008	97.992	8021	391526	399547
Staphylococcus_#_aureus_!_subsp._{_aureus_}_WW2703/97_genomic_scaffold_supercont1.36_whole_genome_shotgun_sequence|gi|282909938|ref|NZ_GG730255.1|	3.787	96.213	7954	202063	210017
Staphylococcus_#_aureus_!_M1015_{_genomic_}_scaffold_acvqH-supercont1.5_whole_genome_shotgun_sequence|gi|486404951|ref|NZ_KB821838.1|	0.8	99.2	7935	984089	992024
Staphylococcus_#_aureus_!_M1531_{_genomic_}_scaffold_acunL-supercont1.2_whole_genome_shotgun_sequence|gi|487137933|ref|NZ_KB822264.1|	0.33	99.67	7872	2377474	2385346
Bacillus_#_subtilis_!_subsp._{_subtilis_}_str._BSP1_chromosome_complete_genome|gi|430755491|ref|NC_019896.1|	0.194	99.806	7857	4035897	4043754
Staphylococcus_#_aureus_!_M0212_{_genomic_}_scaffold_acuna-supercont1.3_whole_genome_shotgun_sequence|gi|487360877|ref|NZ_KB821112.1|	0.623	99.377	7832	1249869	1257701
Staphylococcus_#_aureus_!_M0438_{_genomic_}_scaffold_acuml-supercont1.3_whole_genome_shotgun_sequence|gi|487368648|ref|NZ_KB821352.1|	0.64	99.36	7775	1206517	1214292
Staphylococcus_#_aureus_!_M1544_{_genomic_}_scaffold_acunm-supercont1.5_whole_genome_shotgun_sequence|gi|487139035|ref|NZ_KB822280.1|	1.105	98.895	7732	691964	699696
Staphylococcus_#_aureus_!_subsp._{_aureus_}_D139_genomic_scaffold_supercont1.13_whole_genome_shotgun_sequence|gi|282916185|ref|NZ_GG730171.1|	2.308	97.692	7725	326932	334657
Staphylococcus_#_aureus_!_M1044_{_genomic_}_scaffold_acumE-supercont1.6_whole_genome_shotgun_sequence|gi|487392815|ref|NZ_KB821886.1|	1.212	98.788	7622	621402	629024
Bacillus_#_amyloliquefaciens_!_subsp._{_plantarum_}_AS43.3_chromosome_complete_genome|gi|429503531|ref|NC_019842.1|	0.192	99.808	7615	3953753	3961368
Staphylococcus_#_aureus_!_M0391_{_genomic_}_scaffold_acqwG-supercont1.6_whole_genome_shotgun_sequence|gi|486291032|ref|NZ_KB821314.1|	2.428	97.572	7603	305537	313140
Staphylococcus_#_aureus_!_M0060_{_genomic_}_scaffold_acrGU-supercont1.4_whole_genome_shotgun_sequence|gi|487336408|ref|NZ_KB820987.1|	1.676	98.324	7602	446002	453604
Staphylococcus_#_aureus_!_M0197_{_genomic_}_scaffold_acrGV-supercont1.3_whole_genome_shotgun_sequence|gi|486257669|ref|NZ_KB821086.1|	1.471	98.529	7602	509187	516789
Staphylococcus_#_aureus_!_M1407_{_genomic_}_scaffold_acuod-supercont1.2_whole_genome_shotgun_sequence|gi|487401590|ref|NZ_KB822380.1|	0.899	99.101	7570	834079	841649
Staphylococcus_#_aureus_!_M0270_{_genomic_}_scaffold_acrGX-supercont1.5_whole_genome_shotgun_sequence|gi|487374986|ref|NZ_KB821162.1|	2.234	97.766	7502	328241	335743
Staphylococcus_#_aureus_!_subsp._{_aureus_}_D139_genomic_scaffold_supercont1.3_whole_genome_shotgun_sequence|gi|282915419|ref|NZ_GG730161.1|	3.357	96.643	7446	214384	221830
Staphylococcus_#_aureus_!_M1563_{_genomic_}_scaffold_acuoe-supercont1.1_whole_genome_shotgun_sequence|gi|487146604|ref|NZ_KB822304.1|	1.048	98.952	7419	700797	708216
Staphylococcus_#_aureus_!_M0946_{_genomic_}_scaffold_acunJ-supercont1.8_whole_genome_shotgun_sequence|gi|487388234|ref|NZ_KB821793.1|	2.131	97.869	7418	340737	348155
Macrococcus_#_caseolyticus_!_JCSC5402_{_complete_}_genome|gi|222150250|ref|NC_011999.1|	0.352	99.648	7406	2094918	2102324
Staphylococcus_#_aureus_!_M0450_{_genomic_}_scaffold_acqwq-supercont1.2_whole_genome_shotgun_sequence|gi|486302143|ref|NZ_KB821344.1|	1.148	98.852	7403	637600	645003
Staphylococcus_#_aureus_!_M0529_{_genomic_}_scaffold_acumA-supercont1.3_whole_genome_shotgun_sequence|gi|486414273|ref|NZ_KB821433.1|	1.591	98.409	7402	457859	465261
Staphylococcus_#_aureus_!_M0329_{_genomic_}_scaffold_acrHa-supercont1.6_whole_genome_shotgun_sequence|gi|486274654|ref|NZ_KB821230.1|	0.916	99.084	7353	795261	802614
Staphylococcus_#_aureus_!_M1311_{_genomic_}_scaffold_aculZ-supercont1.4_whole_genome_shotgun_sequence|gi|486840504|ref|NZ_KB822178.1|	1.956	98.044	7343	368093	375436
Staphylococcus_#_aureus_!_subsp._{_aureus_}_M809_genomic_scaffold_supercont1.11_whole_genome_shotgun_sequence|gi|293509961|ref|NZ_GG749309.1|	2.021	97.979	7325	355046	362371
Staphylococcus_#_aureus_!_M0237_{_genomic_}_scaffold_acrHd-supercont1.2_whole_genome_shotgun_sequence|gi|486261107|ref|NZ_KB821134.1|	1.353	98.647	7274	530464	537738
Staphylococcus_#_aureus_!_HI013_{_genomic_}_scaffold_acqwl-supercont1.3_whole_genome_shotgun_sequence|gi|486215850|ref|NZ_KB820900.1|	6.397	93.603	7271	106395	113666
Staphylococcus_#_aureus_!_M0528_{_genomic_}_scaffold_acvqo-supercont1.7_whole_genome_shotgun_sequence|gi|486339825|ref|NZ_KB821428.1|	1.086	98.914	7180	653817	660997
Staphylococcus_#_aureus_!_subsp._{_aureus_}_MRSA177_genomic_scaffold_Scfld52_whole_genome_shotgun_sequence|gi|422742750|ref|NZ_GL638208.1|	6.308	93.692	7155	106273	113428
Staphylococcus_#_aureus_!_M0408_{_genomic_}_scaffold_acrHk-supercont1.2_whole_genome_shotgun_sequence|gi|486294733|ref|NZ_KB821327.1|	2.445	97.555	7151	285276	292427
Staphylococcus_#_aureus_!_subsp._{_aureus_}_C101_genomic_scaffold_supercont1.20_whole_genome_shotgun_sequence|gi|282925650|ref|NZ_GG730139.1|	1.984	98.016	7144	352846	359990
Staphylococcus_#_aureus_!_M1007_{_genomic_}_scaffold_acvqZ-supercont1.4_whole_genome_shotgun_sequence|gi|486401664|ref|NZ_KB821832.1|	6.134	93.866	7132	109147	116279
Staphylococcus_#_aureus_!_subsp._{_aureus_}_M899_genomic_scaffold_supercont1.17_whole_genome_shotgun_sequence|gi|282915018|ref|NZ_GG730206.1|	1.933	98.067	7044	357321	364365
Staphylococcus_#_aureus_!_M1036_{_genomic_}_scaffold_acvqI-supercont1.4_whole_genome_shotgun_sequence|gi|486407993|ref|NZ_KB821865.1|	1.127	98.873	7042	617747	624789
Staphylococcus_#_aureus_!_subsp._{_aureus_}_TCH130_genomic_scaffold_SCAFFOLD6_whole_genome_shotgun_sequence|gi|255925768|ref|NZ_GG698163.1|	6.334	93.666	7003	103564	110567
Staphylococcus_#_aureus_!_M1095_{_genomic_}_scaffold_aculR-supercont1.4_whole_genome_shotgun_sequence|gi|486426334|ref|NZ_KB821982.1|	1.095	98.905	6959	628728	635687
Staphylococcus_#_aureus_!_M0978_{_genomic_}_scaffold_acunG-supercont1.7_whole_genome_shotgun_sequence|gi|487390337|ref|NZ_KB821777.1|	0.318	99.682	6938	2172320	2179258
Staphylococcus_#_aureus_!_M1223_{_genomic_}_scaffold_acune-supercont1.4_whole_genome_shotgun_sequence|gi|487396450|ref|NZ_KB822074.1|	6.089	93.911	6903	106466	113369
Staphylococcus_#_aureus_!_M1244_{_genomic_}_scaffold_acumu-supercont1.3_whole_genome_shotgun_sequence|gi|487397020|ref|NZ_KB822092.1|	4.033	95.967	6891	163964	170855
Bacillus_#_licheniformis_!_9945A_{_complete_}_genome|gi|511060863|ref|NC_021362.1|	0.156	99.844	6847	4369458	4376305
Staphylococcus_#_aureus_!_M0001_{_genomic_}_scaffold_acrHn-supercont1.15_whole_genome_shotgun_sequence|gi|486217883|ref|NZ_KB820933.1|	24.866	75.134	6801	20550	27351
Staphylococcus_#_aureus_!_subsp._{_aureus_}_MRSA177_genomic_scaffold_Scfld20_whole_genome_shotgun_sequence|gi|422742311|ref|NZ_GL638202.1|	6.31	93.69	6795	100892	107687
Bacillus_#_subtilis_!_subsp._{_spizizenii_}_TU-B-10_chromosome_complete_genome|gi|350264100|ref|NC_016047.1|	0.16	99.84	6749	4200473	4207222
Staphylococcus_#_aureus_!_subsp._{_aureus_}_TCH130_genomic_scaffold_SCAFFOLD15_whole_genome_shotgun_sequence|gi|255925777|ref|NZ_GG698172.1|	4.661	95.339	6652	136076	142728
Staphylococcus_#_aureus_!_subsp._{_aureus_}_68-397_genomic_scaffold_supercont1.4_whole_genome_shotgun_sequence|gi|257429934|ref|NZ_GG700577.1|	2.233	97.767	6650	291162	297812
Staphylococcus_#_aureus_!_M1064_{_genomic_}_scaffold_acumU-supercont1.8_whole_genome_shotgun_sequence|gi|486421189|ref|NZ_KB821944.1|	5.515	94.485	6631	113608	120239
Staphylococcus_#_aureus_!_M0347_{_genomic_}_scaffold_acqxu-supercont1.2_whole_genome_shotgun_sequence|gi|486282563|ref|NZ_KB821247.1|	1.353	98.647	6588	480458	487046
Carnobacterium_#_sp._!_17-4_{_chromosome_}_complete_genome|gi|328956382|ref|NC_015391.1|	0.248	99.752	6534	2628760	2635294
Staphylococcus_#_aureus_!_subsp._{_aureus_}_EMRSA16_genomic_scaffold_supercont1.15_whole_genome_shotgun_sequence|gi|295428440|ref|NZ_GG770527.1|	3.475	96.525	6462	179472	185934
Bacillus_#_coagulans_!_36D1_{_chromosome_}_complete_genome|gi|347750441|ref|NC_016023.1|	0.173	99.827	6150	3546076	3552226
Staphylococcus_#_aureus_!_M0102_{_genomic_}_scaffold_acqwC-supercont1.1_whole_genome_shotgun_sequence|gi|486239304|ref|NZ_KB821006.1|	1.749	98.251	6145	345266	351411
Staphylococcus_#_aureus_!_M1034_{_genomic_}_scaffold_acumn-supercont1.6_whole_genome_shotgun_sequence|gi|487391557|ref|NZ_KB821857.1|	1.781	98.219	6123	337610	343733
Staphylococcus_#_aureus_!_M0877_{_genomic_}_scaffold_acumt-supercont1.4_whole_genome_shotgun_sequence|gi|487385165|ref|NZ_KB821717.1|	3.502	96.498	6113	168464	174577
Bacillus_#_amyloliquefaciens_!_XH7_{_chromosome_}_complete_genome|gi|384166624|ref|NC_017191.1|	0.155	99.845	6110	3933093	3939203
Staphylococcus_#_aureus_!_subsp._{_aureus_}_EMRSA16_genomic_scaffold_supercont1.7_whole_genome_shotgun_sequence|gi|295427229|ref|NZ_GG770519.1|	2.631	97.369	6074	224797	230871
Staphylococcus_#_aureus_!_subsp._{_aureus_}_TCH130_genomic_scaffold_SCAFFOLD9_whole_genome_shotgun_sequence|gi|255925771|ref|NZ_GG698166.1|	5.853	94.147	6063	97530	103593
Staphylococcus_#_aureus_!_M1531_{_genomic_}_scaffold_acunL-supercont1.3_whole_genome_shotgun_sequence|gi|487137976|ref|NZ_KB822265.1|	13.165	86.835	6046	39880	45926
Staphylococcus_#_aureus_!_subsp._{_aureus_}_MRSA177_genomic_scaffold_Scfld53_whole_genome_shotgun_sequence|gi|422742863|ref|NZ_GL638209.1|	6.884	93.116	6041	81719	87760
Staphylococcus_#_aureus_!_subsp._{_aureus_}_ATCC_51811_genomic_scaffold_SCAFFOLD3_whole_genome_shotgun_sequence|gi|297210121|ref|NZ_GG774482.1|	4.589	95.411	5974	124193	130167
Bacillus_#_amyloliquefaciens_!_LL3_{_chromosome_}_complete_genome|gi|384162404|ref|NC_017190.1|	0.149	99.851	5947	3989280	3995227
Staphylococcus_#_aureus_!_subsp._{_aureus_}_MRSA177_genomic_scaffold_Scfld61_whole_genome_shotgun_sequence|gi|422743031|ref|NZ_GL638213.1|	10.767	89.233	5843	48425	54268
Bacillus_#_atrophaeus_!_1942_{_chromosome_}_complete_genome|gi|311066968|ref|NC_014639.1|	0.14	99.86	5835	4162431	4168266
Staphylococcus_#_aureus_!_subsp._{_aureus_}_TCH130_genomic_scaffold_SCAFFOLD8_whole_genome_shotgun_sequence|gi|255925770|ref|NZ_GG698165.1|	4.251	95.749	5821	131124	136945
Staphylococcus_#_aureus_!_subsp._{_aureus_}_M809_genomic_scaffold_supercont1.13_whole_genome_shotgun_sequence|gi|293510275|ref|NZ_GG749311.1|	2.429	97.571	5705	229191	234896
Staphylococcus_#_aureus_!_subsp._{_aureus_}_MRSA177_genomic_scaffold_Scfld78_whole_genome_shotgun_sequence|gi|422743378|ref|NZ_GL638219.1|	24.59	75.41	5619	17232	22851
Staphylococcus_#_aureus_!_M0427_{_genomic_}_scaffold_acqxJ-supercont1.1_whole_genome_shotgun_sequence|gi|486299599|ref|NZ_KB821335.1|	0.199	99.801	5600	2805767	2811367
Staphylococcus_#_aureus_!_M1275_{_genomic_}_scaffold_acumX-supercont1.4_whole_genome_shotgun_sequence|gi|487397585|ref|NZ_KB822133.1|	12.399	87.601	5586	39466	45052
Staphylococcus_#_aureus_!_M0953_{_genomic_}_scaffold_acvql-supercont1.2_whole_genome_shotgun_sequence|gi|486396452|ref|NZ_KB821796.1|	0.389	99.611	5524	1415573	1421097
Staphylococcus_#_aureus_!_subsp._{_aureus_}_MRSA177_genomic_scaffold_Scfld514_whole_genome_shotgun_sequence|gi|422744608|ref|NZ_GL638244.1|	11.741	88.259	5419	40737	46156
Staphylococcus_#_aureus_!_subsp._{_aureus_}_H19_genomic_scaffold_supercont1.9_whole_genome_shotgun_sequence|gi|283770944|ref|NZ_GG730343.1|	2.316	97.684	5407	228066	233473
Bacillus_#_amyloliquefaciens_!_TA208_{_chromosome_}_complete_genome|gi|384157612|ref|NC_017188.1|	0.134	99.866	5290	3932221	3937511
Staphylococcus_#_aureus_!_M1275_{_genomic_}_scaffold_acumX-supercont1.5_whole_genome_shotgun_sequence|gi|487397737|ref|NZ_KB822134.1|	0.226	99.774	5215	2306828	2312043
Staphylococcus_#_aureus_!_subsp._{_aureus_}_Btn1260_genomic_scaffold_supercont1.5_whole_genome_shotgun_sequence|gi|282905146|ref|NZ_GG730260.1|	2.914	97.086	5127	170819	175946
Listeria_#_monocytogenes_!_serotype_{_4b_}_str._LL195_complete_genome|gi|424712850|ref|NC_019556.1|	0.173	99.827	5012	2899650	2904662
Staphylococcus_#_aureus_!_M0404_{_genomic_}_scaffold_acrGQ-supercont1.6_whole_genome_shotgun_sequence|gi|487378947|ref|NZ_KB821307.1|	0.338	99.662	4969	1466239	1471208
Staphylococcus_#_aureus_!_subsp._{_aureus_}_MRSA131_genomic_scaffold_Scfld18_whole_genome_shotgun_sequence|gi|422744992|ref|NZ_GL638165.1|	7.181	92.819	4918	63564	68482
Bacillus_#_cereus_!_BAG2O-2_{_genomic_}_scaffold_supercont1.1_whole_genome_shotgun_sequence|gi|514983440|ref|NZ_KE332507.1|	0.091	99.909	4784	5271525	5276309
Staphylococcus_#_aureus_!_subsp._{_aureus_}_USA300_TCH959_genomic_scaffold_SCAFFOLD4_whole_genome_shotgun_sequence|gi|255926320|ref|NZ_GG697988.1|	4.343	95.657	4767	105007	109774
Listeria_#_welshimeri_!_serovar_{_6b_}_str._SLCC5334_chromosome_complete_genome|gi|116871422|ref|NC_008555.1|	0.168	99.832	4730	2809400	2814130
Staphylococcus_#_aureus_!_subsp._{_aureus_}_MRSA177_genomic_scaffold_Scfld56_whole_genome_shotgun_sequence|gi|422742934|ref|NZ_GL638211.1|	24.542	75.458	4675	14374	19049
Staphylococcus_#_aureus_!_subsp._{_aureus_}_C101_genomic_scaffold_supercont1.11_whole_genome_shotgun_sequence|gi|282924532|ref|NZ_GG730130.1|	2.595	97.405	4654	174659	179313
Staphylococcus_#_aureus_!_subsp._{_aureus_}_58-424_genomic_scaffold_supercont1.13_whole_genome_shotgun_sequence|gi|293507733|ref|NZ_GG749066.1|	2.697	97.303	4644	167557	172201
Staphylococcus_#_aureus_!_subsp._{_aureus_}_E1410_genomic_scaffold_supercont1.14_whole_genome_shotgun_sequence|gi|257433992|ref|NZ_GG700610.1|	2.706	97.294	4644	166964	171608
Bacillus_#_licheniformis_!_ATCC_{_14580_}_chromosome_complete_genome|gi|163119169|ref|NC_006270.3|	0.108	99.892	4557	4218040	4222597
Staphylococcus_#_aureus_!_subsp._{_aureus_}_M1015_genomic_scaffold_supercont1.9_whole_genome_shotgun_sequence|gi|293530869|ref|NZ_GG749004.1|	2.548	97.452	4554	174195	178749
Staphylococcus_#_epidermidis_!_M23864:W2(grey)_{_genomic_}_scaffold_SCAFFOLD1_whole_genome_shotgun_sequence|gi|293368503|ref|NZ_GG749255.1|	0.273	99.727	4544	1661145	1665689
Staphylococcus_#_aureus_!_M0528_{_genomic_}_scaffold_acvqo-supercont1.11_whole_genome_shotgun_sequence|gi|486335757|ref|NZ_KB821416.1|	0.398	99.602	4535	1135446	1139981
Listeria_#_ivanovii_!_subsp._{_ivanovii_}_PAM_55_complete_genome|gi|347547510|ref|NC_016011.1|	0.155	99.845	4532	2924347	2928879
Listeria_#_seeligeri_!_serovar_{_1/2b_}_str._SLCC3954_chromosome_complete_genome|gi|289433373|ref|NC_013891.1|	0.162	99.838	4532	2793104	2797636
Staphylococcus_#_aureus_!_M0108_{_genomic_}_scaffold_acunZ-supercont1.5_whole_genome_shotgun_sequence|gi|487358807|ref|NZ_KB821037.1|	0.387	99.613	4492	1156611	1161103
Geobacillus_#_sp._!_Y4.1MC1_{_chromosome_}_complete_genome|gi|312109151|ref|NC_014650.1|	0.116	99.884	4450	3835880	3840330
Geobacillus_#_thermodenitrificans_!_NG80-2_{_chromosome_}_complete_genome|gi|138893679|ref|NC_009328.1|	0.125	99.875	4450	3545869	3550319
Listeria_#_monocytogenes_!_M7_{_chromosome_}_complete_genome|gi|386025288|ref|NC_017537.1|	0.149	99.851	4432	2971731	2976163
Staphylococcus_#_aureus_!_M0673_{_genomic_}_scaffold_acumv-supercont1.3_whole_genome_shotgun_sequence|gi|487382473|ref|NZ_KB821564.1|	0.54	99.46	4429	815231	819660
Staphylococcus_#_aureus_!_subsp._{_aureus_}_Btn1260_genomic_scaffold_supercont1.4_whole_genome_shotgun_sequence|gi|282904894|ref|NZ_GG730259.1|	1.634	98.366	4347	261655	266002
Staphylococcus_#_aureus_!_M1103_{_genomic_}_scaffold_acump-supercont1.1_whole_genome_shotgun_sequence|gi|486428532|ref|NZ_KB822034.1|	0.22	99.78	4325	1959454	1963779
Exiguobacterium_#_sibiricum_!_255-15_{_chromosome_}_complete_genome|gi|172056045|ref|NC_010556.1|	0.142	99.858	4302	3029834	3034136
Staphylococcus_#_aureus_!_M0822_{_genomic_}_scaffold_acunB-supercont1.7_whole_genome_shotgun_sequence|gi|487383827|ref|NZ_KB821686.1|	0.463	99.537	4298	924098	928396
Staphylococcus_#_aureus_!_subsp._{_aureus_}_C101_genomic_scaffold_supercont1.12_whole_genome_shotgun_sequence|gi|282924788|ref|NZ_GG730131.1|	1.795	98.205	4272	233759	238031
Staphylococcus_#_aureus_!_subsp._{_aureus_}_M1015_genomic_scaffold_supercont1.11_whole_genome_shotgun_sequence|gi|293537077|ref|NZ_GG749006.1|	1.792	98.208	4272	234099	238371
Staphylococcus_#_aureus_!_subsp._{_aureus_}_M809_genomic_scaffold_supercont1.14_whole_genome_shotgun_sequence|gi|293510534|ref|NZ_GG749312.1|	1.797	98.203	4272	233428	237700
Staphylococcus_#_aureus_!_subsp._{_aureus_}_M809_genomic_scaffold_supercont1.10_whole_genome_shotgun_sequence|gi|293509762|ref|NZ_GG749308.1|	2.042	97.958	4226	202771	206997
Staphylococcus_#_aureus_!_subsp._{_aureus_}_M809_genomic_scaffold_supercont1.23_whole_genome_shotgun_sequence|gi|293511188|ref|NZ_GG749321.1|	2.289	97.711	4225	180359	184584
Bacillus_#_cereus_!_03BB102_{_complete_}_genome|gi|225862057|ref|NC_012472.1|	0.08	99.92	4214	5265414	5269628
Bacillus_#_thuringiensis_!_serovar_{_konkukian_}_str._97-27_chromosome_complete_genome|gi|49476684|ref|NC_005957.1|	0.08	99.92	4214	5233468	5237682
Staphylococcus_#_epidermidis_!_W23144_{_genomic_}_scaffold_SCAFFOLD5_whole_genome_shotgun_sequence|gi|254212923|ref|NZ_GG696803.1|	1.747	98.253	4207	236635	240842
Staphylococcus_#_aureus_!_subsp._{_aureus_}_C101_genomic_scaffold_supercont1.9_whole_genome_shotgun_sequence|gi|282924193|ref|NZ_GG730128.1|	1.881	98.119	4201	219159	223360
Staphylococcus_#_aureus_!_M0622_{_genomic_}_scaffold_acvqA-supercont1.3_whole_genome_shotgun_sequence|gi|486362492|ref|NZ_KB821504.1|	0.21	99.79	4182	1985854	1990036
Staphylococcus_#_aureus_!_subsp._{_aureus_}_D139_genomic_scaffold_supercont1.12_whole_genome_shotgun_sequence|gi|282915991|ref|NZ_GG730170.1|	2.158	97.842	4163	188746	192909
Staphylococcus_#_aureus_!_subsp._{_aureus_}_MRSA177_genomic_scaffold_Scfld16_whole_genome_shotgun_sequence|gi|422742271|ref|NZ_GL638201.1|	9.097	90.903	4125	41221	45346
Staphylococcus_#_aureus_!_M0584_{_genomic_}_scaffold_acunu-supercont1.3_whole_genome_shotgun_sequence|gi|487371238|ref|NZ_KB821491.1|	0.355	99.645	4079	1146296	1150375
Bacillus_#_coagulans_!_2-6_{_chromosome_}_complete_genome|gi|336112679|ref|NC_015634.1|	0.131	99.869	4041	3069038	3073079
Staphylococcus_#_aureus_!_M1565_{_genomic_}_scaffold_acunk-supercont1.1_whole_genome_shotgun_sequence|gi|487186501|ref|NZ_KB822299.1|	0.183	99.817	4041	2206025	2210066
Enterococcus_#_faecium_!_DO_{_chromosome_}_complete_genome|gi|389867183|ref|NC_017960.1|	0.15	99.85	4038	2694099	2698137
Enterococcus_#_hirae_!_ATCC_{_9790_}_chromosome_complete_genome|gi|392987295|ref|NC_018081.1|	0.143	99.857	4038	2823703	2827741
Listeria_#_monocytogenes_!_HCC23_{_chromosome_}_complete_genome|gi|217963303|ref|NC_011660.1|	0.135	99.865	4032	2972180	2976212
Listeria_#_monocytogenes_!_L312_{_complete_}_genome|gi|406702775|ref|NC_018642.1|	0.138	99.862	4030	2908316	2912346
Staphylococcus_#_aureus_!_subsp._{_aureus_}_MRSA131_genomic_scaffold_Scfld13_whole_genome_shotgun_sequence|gi|422744965|ref|NZ_GL638164.1|	11.254	88.746	4015	31662	35677
Staphylococcus_#_aureus_!_M0934_{_genomic_}_scaffold_acvqs-supercont1.1_whole_genome_shotgun_sequence|gi|486387797|ref|NZ_KB821760.1|	0.182	99.818	4009	2199028	2203037
Staphylococcus_#_aureus_!_M1193_{_genomic_}_scaffold_acunb-supercont1.1_whole_genome_shotgun_sequence|gi|487401055|ref|NZ_KB822373.1|	0.14	99.86	3983	2840951	2844934
Staphylococcus_#_aureus_!_M1394_{_genomic_}_scaffold_acuny-supercont1.1_whole_genome_shotgun_sequence|gi|487083277|ref|NZ_KB822228.1|	0.141	99.859	3982	2812458	2816440
Carnobacterium_#_maltaromaticum_!_LMA28_{_complete_}_genome|gi|508605261|ref|NC_019425.2|	0.108	99.892	3958	3646458	3650416
Staphylococcus_#_aureus_!_M1142_{_genomic_}_scaffold_acumk-supercont1.1_whole_genome_shotgun_sequence|gi|487396127|ref|NZ_KB821988.1|	0.251	99.749	3947	1571395	1575342
Staphylococcus_#_aureus_!_subsp._{_aureus_}_A017934/97_genomic_scaffold_supercont1.14_whole_genome_shotgun_sequence|gi|283958620|ref|NZ_GG731508.1|	2.109	97.891	3942	182998	186940
Staphylococcus_#_aureus_!_subsp._{_aureus_}_WW2703/97_genomic_scaffold_supercont1.28_whole_genome_shotgun_sequence|gi|282909179|ref|NZ_GG730247.1|	2.293	97.707	3942	167998	171940
Staphylococcus_#_aureus_!_subsp._{_aureus_}_68-397_genomic_scaffold_supercont1.8_whole_genome_shotgun_sequence|gi|257430852|ref|NZ_GG700581.1|	2.823	97.177	3941	135666	139607
Staphylococcus_#_aureus_!_subsp._{_aureus_}_MRSA131_genomic_scaffold_Scfld121_whole_genome_shotgun_sequence|gi|422745993|ref|NZ_GL638180.1|	20.139	79.861	3922	15553	19475
Staphylococcus_#_aureus_!_subsp._{_aureus_}_MRSA177_genomic_scaffold_Scfld63_whole_genome_shotgun_sequence|gi|422743087|ref|NZ_GL638214.1|	10.973	89.027	3915	31762	35677
Bacillus_#_cereus_!_E33L_{_chromosome_}_complete_genome|gi|52140164|ref|NC_006274.1|	0.074	99.926	3913	5297002	5300915
Bacillus_#_cereus_!_Q1_{_chromosome_}_complete_genome|gi|222093774|ref|NC_011969.1|	0.075	99.925	3913	5210282	5214195
Bacillus_#_cytotoxicus_!_NVH_{_391-98_}_chromosome_complete_genome|gi|152973854|ref|NC_009674.1|	0.096	99.904	3913	4083111	4087024
Bacillus_#_thuringiensis_!_serovar_{_thuringiensis_}_str._IS5056_complete_genome|gi|452196381|ref|NC_020376.1|	0.071	99.929	3913	5488022	5491935
Bacillus_#_cereus_!_FRI-35_{_chromosome_}_complete_genome|gi|402552844|ref|NC_018491.1|	0.077	99.923	3912	5079264	5083176
Staphylococcus_#_aureus_!_M0330_{_genomic_}_scaffold_acqxt-supercont1.2_whole_genome_shotgun_sequence|gi|486278717|ref|NZ_KB821221.1|	0.148	99.852	3912	2646513	2650425
Streptococcus_#_agalactiae_!_SA20-06_{_chromosome_}_complete_genome|gi|410593712|ref|NC_019048.1|	0.214	99.786	3892	1816994	1820886
Staphylococcus_#_aureus_!_M1215_{_genomic_}_scaffold_aculX-supercont1.1_whole_genome_shotgun_sequence|gi|486506047|ref|NZ_KB822069.1|	0.137	99.863	3884	2823546	2827430
Staphylococcus_#_aureus_!_M0252_{_genomic_}_scaffold_acqxE-supercont1.1_whole_genome_shotgun_sequence|gi|486266332|ref|NZ_KB821139.1|	0.14	99.86	3881	2768807	2772688
Bacillus_#_cereus_!_ATCC_{_14579_}_complete_genome|gi|30018278|ref|NC_004722.1|	0.072	99.928	3878	5407931	5411809
Staphylococcus_#_aureus_!_subsp._{_aureus_}_A017934/97_genomic_scaffold_supercont1.4_whole_genome_shotgun_sequence|gi|283957309|ref|NZ_GG731498.1|	67.527	32.473	3874	1863	5737
Staphylococcus_#_aureus_!_subsp._{_aureus_}_Btn1260_genomic_scaffold_supercont1.3_whole_genome_shotgun_sequence|gi|282904893|ref|NZ_GG730258.1|	62.635	37.365	3874	2311	6185
Staphylococcus_#_aureus_!_subsp._{_aureus_}_C160_genomic_scaffold_supercont1.22_whole_genome_shotgun_sequence|gi|282904834|ref|NZ_GG730294.1|	63.467	36.533	3874	2230	6104
Streptococcus_#_salivarius_!_CCHSS3_{_complete_}_genome|gi|340397867|ref|NC_015760.1|	0.174	99.826	3864	2213320	2217184
Bacillus_#_subtilis_!_subsp._{_subtilis_}_str._JH642_chromosome_whole_genome_shotgun_sequence|gi|223666306|ref|NZ_CM000489.1|	0.092	99.908	3847	4183768	4187615
Bacillus_#_subtilis_!_subsp._{_subtilis_}_str._NCIB_3610_chromosome_whole_genome_shotgun_sequence|gi|223666305|ref|NZ_CM000488.1|	0.091	99.909	3847	4210751	4214598
Bacillus_#_subtilis_!_subsp._{_subtilis_}_str._SMY_chromosome_whole_genome_shotgun_sequence|gi|223666307|ref|NZ_CM000490.1|	0.091	99.909	3847	4210796	4214643
Streptococcus_#_gallolyticus_!_subsp._{_gallolyticus_}_ATCC_BAA-2069_complete_genome|gi|325977200|ref|NC_015215.1|	0.162	99.838	3808	2352636	2356444
Staphylococcus_#_aureus_!_M0347_{_genomic_}_scaffold_acqxu-supercont1.3_whole_genome_shotgun_sequence|gi|486284496|ref|NZ_KB821248.1|	0.16	99.84	3793	2360170	2363963
Streptococcus_#_agalactiae_!_GD201008-001_{_chromosome_}_complete_genome|gi|406708523|ref|NC_018646.1|	0.184	99.816	3792	2059320	2063112
Listeria_#_monocytogenes_!_08-5578_{_chromosome_}_complete_genome|gi|284800255|ref|NC_013766.1|	0.125	99.875	3776	3028512	3032288
Listeria_#_monocytogenes_!_08-5923_{_complete_}_genome|gi|284993440|ref|NC_013768.1|	0.126	99.874	3776	2995278	2999054
Staphylococcus_#_aureus_!_subsp._{_aureus_}_D139_genomic_scaffold_supercont1.20_whole_genome_shotgun_sequence|gi|282917134|ref|NZ_GG730178.1|	2.112	97.888	3769	174685	178454
Geobacillus_#_thermoglucosidasius_!_C56-YS93_{_chromosome_}_complete_genome|gi|336233546|ref|NC_015660.1|	0.096	99.904	3757	3889549	3893306
Staphylococcus_#_aureus_!_subsp._{_aureus_}_55/2053_genomic_scaffold_supercont1.4_whole_genome_shotgun_sequence|gi|257425046|ref|NZ_GG700536.1|	2.138	97.862	3750	171629	175379
Staphylococcus_#_aureus_!_M0695_{_genomic_}_scaffold_acunx-supercont1.7_whole_genome_shotgun_sequence|gi|489045046|ref|NZ_KB821612.1|	18.336	81.664	3749	16697	20446
Staphylococcus_#_aureus_!_subsp._{_aureus_}_68-397_genomic_scaffold_supercont1.5_whole_genome_shotgun_sequence|gi|257430207|ref|NZ_GG700578.1|	2.86	97.14	3724	126481	130205
Staphylococcus_#_aureus_!_subsp._{_aureus_}_68-397_genomic_scaffold_supercont1.3_whole_genome_shotgun_sequence|gi|257429933|ref|NZ_GG700576.1|	70.938	29.062	3720	1524	5244
Staphylococcus_#_aureus_!_subsp._{_aureus_}_C101_genomic_scaffold_supercont1.4_whole_genome_shotgun_sequence|gi|282923126|ref|NZ_GG730123.1|	66.786	33.214	3720	1850	5570
Staphylococcus_#_aureus_!_subsp._{_aureus_}_D139_genomic_scaffold_supercont1.8_whole_genome_shotgun_sequence|gi|282915836|ref|NZ_GG730166.1|	71.635	28.365	3720	1473	5193
Staphylococcus_#_aureus_!_subsp._{_aureus_}_E1410_genomic_scaffold_supercont1.4_whole_genome_shotgun_sequence|gi|257432635|ref|NZ_GG700600.1|	69.287	30.713	3720	1649	5369
Staphylococcus_#_aureus_!_subsp._{_aureus_}_M876_genomic_scaffold_supercont1.4_whole_genome_shotgun_sequence|gi|257435539|ref|NZ_GG700617.1|	70.136	29.864	3720	1584	5304
Staphylococcus_#_aureus_!_subsp._{_aureus_}_WW2703/97_genomic_scaffold_supercont1.7_whole_genome_shotgun_sequence|gi|282907840|ref|NZ_GG730226.1|	73.315	26.685	3720	1354	5074
Staphylococcus_#_aureus_!_subsp._{_aureus_}_68-397_genomic_scaffold_supercont1.11_whole_genome_shotgun_sequence|gi|257431076|ref|NZ_GG700584.1|	1.631	98.369	3708	223688	227396
Staphylococcus_#_aureus_!_subsp._{_aureus_}_EMRSA16_genomic_scaffold_supercont1.13_whole_genome_shotgun_sequence|gi|295428232|ref|NZ_GG770525.1|	1.571	98.429	3708	232375	236083
Staphylococcus_#_aureus_!_subsp._{_aureus_}_WW2703/97_genomic_scaffold_supercont1.14_whole_genome_shotgun_sequence|gi|282908455|ref|NZ_GG730233.1|	2.201	97.799	3700	164414	168114
Staphylococcus_#_aureus_!_M0102_{_genomic_}_scaffold_acqwC-supercont1.4_whole_genome_shotgun_sequence|gi|486240581|ref|NZ_KB821009.1|	0.268	99.732	3686	1372352	1376038
Staphylococcus_#_aureus_!_subsp._{_aureus_}_H19_genomic_scaffold_supercont1.5_whole_genome_shotgun_sequence|gi|283769454|ref|NZ_GG730339.1|	68.231	31.769	3679	1713	5392
Staphylococcus_#_aureus_!_subsp._{_aureus_}_C427_genomic_scaffold_supercont1.4_whole_genome_shotgun_sequence|gi|282918299|ref|NZ_GG730144.1|	65.444	34.556	3676	1941	5617
Staphylococcus_#_aureus_!_subsp._{_aureus_}_MRSA131_genomic_scaffold_Scfld44_whole_genome_shotgun_sequence|gi|422745064|ref|NZ_GL638168.1|	6.532	93.468	3662	52398	56060
Staphylococcus_#_sp._!_HGB0015_{_genomic_}_scaffold_aczIz-supercont1.1_whole_genome_shotgun_sequence|gi|512478017|ref|NZ_KE150417.1|	0.256	99.744	3660	1426104	1429764
Bacillus_#_subtilis_!_BSn5_{_chromosome_}_complete_genome|gi|321311376|ref|NC_014976.1|	0.089	99.911	3646	4089953	4093599
Bacillus_#_cereus_!_ATCC_{_10987_}_complete_genome|gi|42779081|ref|NC_003909.8|	0.069	99.931	3612	5220671	5224283
Bacillus_#_cereus_!_F837/76_{_chromosome_}_complete_genome|gi|376264031|ref|NC_016779.1|	0.069	99.931	3612	5219294	5222906
Bacillus_#_thuringiensis_!_HD-771_{_chromosome_}_complete_genome|gi|402558824|ref|NC_018500.1|	0.061	99.939	3612	5882424	5886036
Bacillus_#_thuringiensis_!_serovar_{_kurstaki_}_str._HD73_complete_genome|gi|449086670|ref|NC_020238.1|	0.064	99.936	3612	5643187	5646799
Clostridium_#_botulinum_!_H04402_{_065_}_complete_genome|gi|387816237|ref|NC_017299.1|	0.092	99.908	3609	3916131	3919740
Staphylococcus_#_aureus_!_M0946_{_genomic_}_scaffold_acunJ-supercont1.5_whole_genome_shotgun_sequence|gi|487388055|ref|NZ_KB821790.1|	1.477	98.523	3608	240604	244212
Staphylococcus_#_aureus_!_M0192_{_genomic_}_scaffold_acqyc-supercont1.3_whole_genome_shotgun_sequence|gi|486255208|ref|NZ_KB821076.1|	0.155	99.845	3582	2311186	2314768
Staphylococcus_#_aureus_!_M0628_{_genomic_}_scaffold_acuno-supercont-complete_whole_genome_shotgun_sequence|gi|486412957|ref|NZ_KB821506.1|	0.127	99.873	3582	2824854	2828436
Staphylococcus_#_aureus_!_subsp._{_aureus_}_WBG10049_genomic_scaffold_supercont1.2_whole_genome_shotgun_sequence|gi|282910156|ref|NZ_GG730209.1|	66.173	33.827	3578	1829	5407
Staphylococcus_#_aureus_!_M1092_{_genomic_}_scaffold_acunK-supercont1.4_whole_genome_shotgun_sequence|gi|486422720|ref|NZ_KB821960.1|	0.328	99.672	3575	1085107	1088682
Enterococcus_#_faecalis_!_str._{_Symbioflor_}_1_complete_genome|gi|428765681|ref|NC_019770.1|	0.127	99.873	3557	2807118	2810675
Staphylococcus_#_epidermidis_!_BVS058A4_{_genomic_}_scaffold_supercont1.2_whole_genome_shotgun_sequence|gi|448879115|ref|NZ_KB373336.1|	0.422	99.578	3551	838587	842138
Staphylococcus_#_aureus_!_subsp._{_aureus_}_EMRSA16_genomic_scaffold_supercont1.18_whole_genome_shotgun_sequence|gi|295428754|ref|NZ_GG770530.1|	1.708	98.292	3549	204228	207777
Staphylococcus_#_aureus_!_M0075_{_genomic_}_scaffold_acunI-supercont1.4_whole_genome_shotgun_sequence|gi|487399870|ref|NZ_KB822350.1|	0.199	99.801	3507	1755409	1758916
Exiguobacterium_#_antarcticum_!_B7_{_chromosome_}_complete_genome|gi|407475894|ref|NC_018665.1|	0.124	99.876	3501	2812362	2815863
Staphylococcus_#_aureus_!_M1563_{_genomic_}_scaffold_acuoe-supercont1.5_whole_genome_shotgun_sequence|gi|487162436|ref|NZ_KB822308.1|	0.915	99.085	3467	375534	379001
Streptococcus_#_thermophilus_!_LMD-9_{_complete_}_genome|gi|116626972|ref|NC_008532.1|	0.186	99.814	3462	1852906	1856368
Staphylococcus_#_aureus_!_M0529_{_genomic_}_scaffold_acumA-supercont1.1_whole_genome_shotgun_sequence|gi|486413843|ref|NZ_KB821431.1|	0.179	99.821	3427	1911091	1914518
Staphylococcus_#_aureus_!_M0060_{_genomic_}_scaffold_acrGU-supercont1.1_whole_genome_shotgun_sequence|gi|487315894|ref|NZ_KB820981.1|	0.194	99.806	3426	1765636	1769062
Staphylococcus_#_aureus_!_M0210_{_genomic_}_scaffold_acqwt-supercont1.1_whole_genome_shotgun_sequence|gi|487373279|ref|NZ_KB821105.1|	0.15	99.85	3425	2281463	2284888
Staphylococcus_#_aureus_!_subsp._{_aureus_}_D139_genomic_scaffold_supercont1.10_whole_genome_shotgun_sequence|gi|282915839|ref|NZ_GG730168.1|	2.259	97.741	3406	147340	150746
Listeria_#_monocytogenes_!_str._{_Scott_}_A_chromosome_whole_genome_shotgun_sequence|gi|424821653|ref|NZ_CM001159.1|	0.113	99.887	3404	3018418	3021822
Staphylococcus_#_aureus_!_M0237_{_genomic_}_scaffold_acrHd-supercont1.3_whole_genome_shotgun_sequence|gi|486261301|ref|NZ_KB821135.1|	0.519	99.481	3397	651689	655086
Staphylococcus_#_aureus_!_M1451_{_genomic_}_scaffold_acunE-supercont1.4_whole_genome_shotgun_sequence|gi|480457480|ref|NZ_KB822244.1|	0.171	99.829	3345	1951372	1954717
Staphylococcus_#_aureus_!_M0197_{_genomic_}_scaffold_acrGV-supercont1.1_whole_genome_shotgun_sequence|gi|486256732|ref|NZ_KB821084.1|	0.172	99.828	3328	1929448	1932776
Bacillus_#_anthracis_!_str._{_'Ames_}_Ancestor'_chromosome_complete_genome|gi|50196905|ref|NC_007530.2|	0.063	99.937	3311	5224108	5227419
Bacillus_#_anthracis_!_str._{_Ames_}_chromosome_complete_genome|gi|30260195|ref|NC_003997.3|	0.063	99.937	3311	5223982	5227293
Bacillus_#_anthracis_!_str._{_Sterne_}_chromosome_complete_genome|gi|49183039|ref|NC_005945.1|	0.063	99.937	3311	5225352	5228663
Staphylococcus_#_aureus_!_plasmid_{_SAP077B_}_complete_sequence|gi|260667563|ref|NC_013341.1|	24.509	75.491	3270	10072	13342
Staphylococcus_#_aureus_!_subsp._{_aureus_}_WBG10049_genomic_scaffold_supercont1.7_whole_genome_shotgun_sequence|gi|282911485|ref|NZ_GG730214.1|	2.229	97.771	3236	141932	145168
Staphylococcus_#_aureus_!_M0045_{_genomic_}_scaffold_acqxU-supercont1.3_whole_genome_shotgun_sequence|gi|486231608|ref|NZ_KB820971.1|	0.143	99.857	3225	2245592	2248817
Staphylococcus_#_aureus_!_M0994_{_genomic_}_scaffold_acunc-supercont1.3_whole_genome_shotgun_sequence|gi|487390907|ref|NZ_KB821811.1|	0.19	99.81	3218	1686870	1690088
Staphylococcus_#_aureus_!_subsp._{_aureus_}_MRSA177_genomic_scaffold_Scfld74_whole_genome_shotgun_sequence|gi|422743355|ref|NZ_GL638218.1|	12.591	87.409	3149	21860	25009
Staphylococcus_#_aureus_!_M1359_{_genomic_}_scaffold_acumL-supercont1.1_whole_genome_shotgun_sequence|gi|486986178|ref|NZ_KB822204.1|	0.155	99.845	3146	2026223	2029369
Streptococcus_#_gallolyticus_!_UCN34_{_chromosome_}_complete_genome|gi|288904223|ref|NC_013798.1|	0.133	99.867	3138	2347773	2350911
Staphylococcus_#_aureus_!_subsp._{_aureus_}_TCH130_genomic_scaffold_SCAFFOLD5_whole_genome_shotgun_sequence|gi|255925767|ref|NZ_GG698162.1|	2.935	97.065	3136	103718	106854
Staphylococcus_#_aureus_!_M0340_{_genomic_}_scaffold_acqxN-supercont1.1_whole_genome_shotgun_sequence|gi|486279730|ref|NZ_KB821241.1|	18.478	81.522	3117	13752	16869
Staphylococcus_#_aureus_!_M0468_{_genomic_}_scaffold_acqxk-supercont1.1_whole_genome_shotgun_sequence|gi|486308227|ref|NZ_KB821358.1|	18.478	81.522	3117	13752	16869
Staphylococcus_#_aureus_!_M1462_{_genomic_}_scaffold_acumH-supercont1.2_whole_genome_shotgun_sequence|gi|487135374|ref|NZ_KB822551.1|	18.376	81.624	3117	13845	16962
Staphylococcus_#_aureus_!_M1407_{_genomic_}_scaffold_acuod-supercont1.1_whole_genome_shotgun_sequence|gi|487401530|ref|NZ_KB822379.1|	0.192	99.808	3104	1615841	1618945
Staphylococcus_#_lugdunensis_!_ACS-027-V-Sch2_{_genomic_}_scaffold_supercont1.3_whole_genome_shotgun_sequence|gi|448879135|ref|NZ_KB373324.1|	0.872	99.128	3079	349845	352924
Staphylococcus_#_aureus_!_M1407_{_genomic_}_scaffold_acuod-supercont1.3_whole_genome_shotgun_sequence|gi|487401610|ref|NZ_KB822381.1|	0.817	99.183	3062	371759	374821
Staphylococcus_#_epidermidis_!_BCM-HMP0060_{_genomic_}_scaffold_SCAFFOLD5_whole_genome_shotgun_sequence|gi|254281374|ref|NZ_GG696731.1|	59.211	40.789	3060	2108	5168
Staphylococcus_#_epidermidis_!_M23864:W2(grey)_{_genomic_}_scaffold_SCAFFOLD4_whole_genome_shotgun_sequence|gi|293368506|ref|NZ_GG749258.1|	58.375	41.625	3060	2182	5242
Staphylococcus_#_epidermidis_!_W23144_{_genomic_}_scaffold_SCAFFOLD9_whole_genome_shotgun_sequence|gi|254212927|ref|NZ_GG696807.1|	60.868	39.132	3058	1966	5024
Staphylococcus_#_hominis_!_subsp._{_hominis_}_C80_genomic_scaffold_supercont1.5_whole_genome_shotgun_sequence|gi|314935894|ref|NZ_GL545256.1|	48.455	51.545	3042	3236	6278
Staphylococcus_#_aureus_!_subsp._{_aureus_}_Btn1260_genomic_scaffold_supercont1.10_whole_genome_shotgun_sequence|gi|282906262|ref|NZ_GG730265.1|	2.112	97.888	3037	140777	143814
Staphylococcus_#_aureus_!_subsp._{_aureus_}_M809_genomic_scaffold_supercont1.22_whole_genome_shotgun_sequence|gi|293510998|ref|NZ_GG749320.1|	1.763	98.237	3019	168235	171254
Staphylococcus_#_aureus_!_M0221_{_genomic_}_scaffold_acqxa-supercont1.1_whole_genome_shotgun_sequence|gi|486258704|ref|NZ_KB821123.1|	17.944	82.056	3017	13796	16813
Bacillus_#_anthracis_!_str._{_H9401_}_chromosome_complete_genome|gi|386733873|ref|NC_017729.1|	0.058	99.942	3010	5215937	5218947
Staphylococcus_#_aureus_!_M0946_{_genomic_}_scaffold_acunJ-supercont1.7_whole_genome_shotgun_sequence|gi|487388174|ref|NZ_KB821792.1|	2.837	97.163	2999	102728	105727
Staphylococcus_#_aureus_!_M0391_{_genomic_}_scaffold_acqwG-supercont1.8_whole_genome_shotgun_sequence|gi|486292280|ref|NZ_KB821316.1|	1.294	98.706	2966	226307	229273
Staphylococcus_#_aureus_!_M1563_{_genomic_}_scaffold_acuoe-supercont1.3_whole_genome_shotgun_sequence|gi|487158594|ref|NZ_KB822306.1|	0.257	99.743	2935	1137639	1140574
Streptococcus_#_infantarius_!_subsp._{_infantarius_}_CJ18_chromosome_complete_genome|gi|379704392|ref|NC_016826.1|	0.147	99.853	2928	1985492	1988420
Streptococcus_#_agalactiae_!_2-22_{_complete_}_genome|gi|494702401|ref|NC_021195.1|	0.158	99.842	2900	1835967	1838867
Staphylococcus_#_aureus_!_subsp._{_aureus_}_EMRSA16_genomic_scaffold_supercont1.6_whole_genome_shotgun_sequence|gi|295427053|ref|NZ_GG770518.1|	1.603	98.397	2897	177873	180770
Lactococcus_#_lactis_!_subsp._{_cremoris_}_MG1363_chromosome_complete_genome|gi|125622882|ref|NC_009004.1|	0.113	99.887	2862	2526616	2529478
Lactococcus_#_lactis_!_subsp._{_cremoris_}_SK11_complete_genome|gi|116510843|ref|NC_008527.1|	0.117	99.883	2862	2435727	2438589
Lactococcus_#_lactis_!_subsp._{_cremoris_}_UC509.9_complete_genome|gi|414073323|ref|NC_019435.1|	0.127	99.873	2862	2247565	2250427
Staphylococcus_#_aureus_!_M1010_{_genomic_}_scaffold_acvqt-supercont1.1_whole_genome_shotgun_sequence|gi|486402553|ref|NZ_KB821824.1|	0.198	99.802	2853	1441559	1444412
Staphylococcus_#_aureus_!_subsp._{_aureus_}_M1015_genomic_scaffold_supercont1.7_whole_genome_shotgun_sequence|gi|293526792|ref|NZ_GG749002.1|	2.845	97.155	2816	96176	98992
Staphylococcus_#_aureus_!_M1092_{_genomic_}_scaffold_acunK-supercont1.1_whole_genome_shotgun_sequence|gi|486421969|ref|NZ_KB821957.1|	0.234	99.766	2805	1196366	1199171
Staphylococcus_#_epidermidis_!_M23864:W1_{_genomic_}_scaffold_SCAFFOLD5_whole_genome_shotgun_sequence|gi|254213015|ref|NZ_GG696777.1|	54.247	45.753	2797	2359	5156
Staphylococcus_#_aureus_!_subsp._{_aureus_}_MRSA131_genomic_scaffold_Scfld221_whole_genome_shotgun_sequence|gi|422746898|ref|NZ_GL638188.1|	17.262	82.738	2760	13229	15989
Staphylococcus_#_aureus_!_M0580_{_genomic_}_scaffold_acvrg-supercont1.1_whole_genome_shotgun_sequence|gi|486356325|ref|NZ_KB821486.1|	0.201	99.799	2752	1364683	1367435
Staphylococcus_#_aureus_!_subsp._{_aureus_}_MRSA131_genomic_scaffold_Scfld60_whole_genome_shotgun_sequence|gi|422745364|ref|NZ_GL638173.1|	8.523	91.477	2750	29514	32264
Staphylococcus_#_aureus_!_subsp._{_aureus_}_MRSA177_genomic_scaffold_Scfld67_whole_genome_shotgun_sequence|gi|422743115|ref|NZ_GL638215.1|	8.523	91.477	2750	29514	32264
Staphylococcus_#_aureus_!_M0562_{_genomic_}_scaffold_acumS-supercont1.2_whole_genome_shotgun_sequence|gi|487370195|ref|NZ_KB821471.1|	0.264	99.736	2741	1034999	1037740
Lactococcus_#_lactis_!_subsp._{_cremoris_}_NZ9000_chromosome_complete_genome|gi|389853198|ref|NC_017949.1|	0.108	99.892	2736	2527558	2530294
Staphylococcus_#_aureus_!_M0280_{_genomic_}_scaffold_acunT-supercont1.8_whole_genome_shotgun_sequence|gi|487362733|ref|NZ_KB821188.1|	0.16	99.84	2732	1709394	1712126
Staphylococcus_#_aureus_!_M0173_{_genomic_}_scaffold_acrHj-supercont1.1_whole_genome_shotgun_sequence|gi|486253298|ref|NZ_KB821070.1|	0.152	99.848	2722	1783695	1786417
Streptococcus_#_parauberis_!_KCTC_{_11537_}_chromosome_complete_genome|gi|333904249|ref|NC_015558.1|	0.127	99.873	2720	2141167	2143887
Streptococcus_#_pasteurianus_!_ATCC_{_43144_}_complete_genome|gi|336063372|ref|NC_015600.1|	0.13	99.87	2720	2097357	2100077
Staphylococcus_#_aureus_!_subsp._{_aureus_}_D139_genomic_scaffold_supercont1.23_whole_genome_shotgun_sequence|gi|282917513|ref|NZ_GG730181.1|	2.264	97.736	2717	117280	119997
Paenibacillus_#_sp._!_JDR-2_{_chromosome_}_complete_genome|gi|251794036|ref|NC_012914.1|	0.038	99.962	2700	7182230	7184930
Staphylococcus_#_aureus_!_M0998_{_genomic_}_scaffold_acvqv-supercont1.1_whole_genome_shotgun_sequence|gi|486398090|ref|NZ_KB821813.1|	0.182	99.818	2653	1452574	1455227
Amphibacillus_#_xylanus_!_NBRC_{_15112_}_complete_genome|gi|408355363|ref|NC_018704.1|	0.103	99.897	2652	2566834	2569486
Staphylococcus_#_aureus_!_M0493_{_genomic_}_scaffold_acqwN-supercont1.3_whole_genome_shotgun_sequence|gi|487380377|ref|NZ_KB821403.1|	0.183	99.817	2637	1440784	1443421
Staphylococcus_#_aureus_!_M0999_{_genomic_}_scaffold_acvqG-supercont1.2_whole_genome_shotgun_sequence|gi|486399550|ref|NZ_KB821821.1|	0.175	99.825	2592	1474488	1477080
Staphylococcus_#_aureus_!_M0943_{_genomic_}_scaffold_acvqw-supercont1.3_whole_genome_shotgun_sequence|gi|486391432|ref|NZ_KB821767.1|	0.249	99.751	2589	1038962	1041551
Staphylococcus_#_aureus_!_M1533_{_genomic_}_scaffold_aculS-supercont1.2_whole_genome_shotgun_sequence|gi|487138257|ref|NZ_KB822286.1|	0.182	99.818	2553	1399613	1402166
Staphylococcus_#_aureus_!_M1109_{_genomic_}_scaffold_acunD-supercont1.3_whole_genome_shotgun_sequence|gi|487395342|ref|NZ_KB822014.1|	0.16	99.84	2538	1583489	1586027
Staphylococcus_#_aureus_!_subsp._{_aureus_}_D139_genomic_scaffold_supercont1.4_whole_genome_shotgun_sequence|gi|282915602|ref|NZ_GG730162.1|	2.63	97.37	2537	93917	96454
Streptococcus_#_macedonicus_!_ACA-DC_{_198_}_complete_genome|gi|374337044|ref|NC_016749.1|	0.119	99.881	2526	2127508	2130034
Staphylococcus_#_aureus_!_M0240_{_genomic_}_scaffold_acqwO-supercont1.9_whole_genome_shotgun_sequence|gi|487374622|ref|NZ_KB821153.1|	1.054	98.946	2510	235648	238158
Staphylococcus_#_caprae_!_C87_{_genomic_}_scaffold_supercont1.11_whole_genome_shotgun_sequence|gi|314934229|ref|NZ_GL545277.1|	41.499	58.501	2509	3537	6046
Staphylococcus_#_aureus_!_M0622_{_genomic_}_scaffold_acvqA-supercont1.2_whole_genome_shotgun_sequence|gi|486361222|ref|NZ_KB821503.1|	0.693	99.307	2486	356427	358913
Staphylococcus_#_epidermidis_!_M0881_{_genomic_}_scaffold_acumm-supercont1.3_whole_genome_shotgun_sequence|gi|489047070|ref|NZ_KB821723.1|	1.998	98.002	2483	121763	124246
Staphylococcus_#_aureus_!_M1521_{_genomic_}_scaffold_acunr-supercont1.6_whole_genome_shotgun_sequence|gi|487137659|ref|NZ_KB822273.1|	0.151	99.849	2481	1636569	1639050
Bacillus_#_amyloliquefaciens_!_IT-45_{_complete_}_genome|gi|451344759|ref|NC_020272.1|	0.063	99.937	2480	3926377	3928857
Bacillus_#_amyloliquefaciens_!_subsp._{_plantarum_}_CAU_B946_complete_genome|gi|375360690|ref|NC_016784.1|	0.062	99.938	2480	4017381	4019861
Bacillus_#_sp._!_JS_{_chromosome_}_complete_genome|gi|386756580|ref|NC_017743.1|	0.06	99.94	2480	4117926	4120406
Bacillus_#_subtilis_!_QB928_{_chromosome_}_complete_genome|gi|402774243|ref|NC_018520.1|	0.06	99.94	2480	4144359	4146839
Geobacillus_#_sp._!_WCH70_{_chromosome_}_complete_genome|gi|239825584|ref|NC_012793.1|	0.071	99.929	2470	3462148	3464618
Staphylococcus_#_aureus_!_M0408_{_genomic_}_scaffold_acrHk-supercont1.3_whole_genome_shotgun_sequence|gi|486295120|ref|NZ_KB821328.1|	1.427	98.573	2466	170330	172796
Streptococcus_#_pyogenes_!_NZ131_{_chromosome_}_complete_genome|gi|209558587|ref|NC_011375.1|	0.136	99.864	2462	1813323	1815785
Staphylococcus_#_aureus_!_M1320_{_genomic_}_scaffold_acumx-supercont1.1_whole_genome_shotgun_sequence|gi|486868496|ref|NZ_KB822182.1|	0.169	99.831	2456	1448685	1451141
Staphylococcus_#_aureus_!_M1481_{_genomic_}_scaffold_aculQ-supercont1.2_whole_genome_shotgun_sequence|gi|487136608|ref|NZ_KB822249.1|	0.231	99.769	2452	1059378	1061830
Staphylococcus_#_aureus_!_subsp._{_aureus_}_MRSA177_genomic_scaffold_Scfld60_whole_genome_shotgun_sequence|gi|422742955|ref|NZ_GL638212.1|	3.354	96.646	2449	70569	73018
Staphylococcus_#_aureus_!_subsp._{_aureus_}_M809_genomic_scaffold_supercont1.6_whole_genome_shotgun_sequence|gi|293509336|ref|NZ_GG749304.1|	78.93	21.07	2435	650	3085
Staphylococcus_#_aureus_!_subsp._{_aureus_}_C160_genomic_scaffold_supercont1.20_whole_genome_shotgun_sequence|gi|282904618|ref|NZ_GG730292.1|	2.717	97.283	2433	87128	89561
Staphylococcus_#_aureus_!_M1510_{_genomic_}_scaffold_aculM-supercont1.5_whole_genome_shotgun_sequence|gi|487399617|ref|NZ_KB822261.1|	0.326	99.674	2430	743306	745736
Lactobacillus_#_ruminis_!_ATCC_{_27782_}_chromosome_complete_genome|gi|347524522|ref|NC_015975.1|	0.117	99.883	2424	2064228	2066652
Staphylococcus_#_aureus_!_subsp._{_aureus_}_C427_genomic_scaffold_supercont1.11_whole_genome_shotgun_sequence|gi|282919625|ref|NZ_GG730151.1|	1.257	98.743	2415	189714	192129
Staphylococcus_#_aureus_!_subsp._{_aureus_}_MRSA131_genomic_scaffold_Scfld119_whole_genome_shotgun_sequence|gi|422745916|ref|NZ_GL638179.1|	3.295	96.705	2409	70709	73118
Staphylococcus_#_aureus_!_M0374_{_genomic_}_scaffold_aculK-supercont1.3_whole_genome_shotgun_sequence|gi|487365551|ref|NZ_KB821280.1|	0.151	99.849	2404	1589247	1591651
Staphylococcus_#_aureus_!_M1322_{_genomic_}_scaffold_acumT-supercont1.2_whole_genome_shotgun_sequence|gi|486956393|ref|NZ_KB822201.1|	0.092	99.908	2396	2594208	2596604
Geobacillus_#_thermoleovorans_!_CCB_US3_UF5_{_chromosome_}_complete_genome|gi|375006802|ref|NC_016593.1|	0.067	99.933	2394	3594226	3596620
Staphylococcus_#_aureus_!_M0547_{_genomic_}_scaffold_acvqJ-supercont1.1_whole_genome_shotgun_sequence|gi|486350836|ref|NZ_KB821442.1|	0.184	99.816	2394	1301015	1303409
Lactobacillus_#_casei_!_BL23_{_chromosome_}_complete_genome|gi|191636824|ref|NC_010999.1|	0.078	99.922	2390	3076806	3079196
Staphylococcus_#_aureus_!_M0240_{_genomic_}_scaffold_acqwO-supercont1.6_whole_genome_shotgun_sequence|gi|487374423|ref|NZ_KB821150.1|	0.388	99.612	2389	613967	616356
Bacillus_#_amyloliquefaciens_!_Y2_{_chromosome_}_complete_genome|gi|387896523|ref|NC_017912.1|	0.056	99.944	2379	4236245	4238624
Staphylococcus_#_aureus_!_M0102_{_genomic_}_scaffold_acqwC-supercont1.6_whole_genome_shotgun_sequence|gi|486241470|ref|NZ_KB821011.1|	0.286	99.714	2377	829033	831410
Staphylococcus_#_epidermidis_!_Scl31_{_genomic_}_scaffold_Scl31_scaffold414_whole_genome_shotgun_sequence|gi|520980007|ref|NZ_KE368152.1|	30.869	69.131	2367	5301	7668
Staphylococcus_#_aureus_!_HI168_{_genomic_}_scaffold_acqxp-supercont1.2_whole_genome_shotgun_sequence|gi|486212564|ref|NZ_KB820920.1|	5.73	94.27	2366	38928	41294
Staphylococcus_#_aureus_!_M1007_{_genomic_}_scaffold_acvqZ-supercont1.2_whole_genome_shotgun_sequence|gi|486400600|ref|NZ_KB821830.1|	5.47	94.53	2366	40889	43255
Staphylococcus_#_aureus_!_M1198_{_genomic_}_scaffold_acumf-supercont1.1_whole_genome_shotgun_sequence|gi|486435575|ref|NZ_KB822051.1|	0.222	99.778	2352	1059063	1061415
Staphylococcus_#_aureus_!_M0391_{_genomic_}_scaffold_acqwG-supercont1.1_whole_genome_shotgun_sequence|gi|486290024|ref|NZ_KB821309.1|	0.209	99.791	2348	1118974	1121322
Weissella_#_koreensis_!_KACC_{_15510_}_chromosome_complete_genome|gi|339633914|ref|NC_015759.1|	0.165	99.835	2340	1420138	1422478
Staphylococcus_#_aureus_!_M1063_{_genomic_}_scaffold_acumZ-supercont1.4_whole_genome_shotgun_sequence|gi|486416208|ref|NZ_KB821906.1|	0.142	99.858	2336	1643726	1646062
Bacillus_#_subtilis_!_subsp._{_subtilis_}_6051-HGW_complete_genome|gi|470160151|ref|NC_020507.1|	0.055	99.945	2333	4213277	4215610
Staphylococcus_#_aureus_!_subsp._{_aureus_}_55/2053_genomic_scaffold_supercont1.14_whole_genome_shotgun_sequence|gi|257426105|ref|NZ_GG700546.1|	3.03	96.97	2321	74269	76590
Staphylococcus_#_aureus_!_subsp._{_aureus_}_68-397_genomic_scaffold_supercont1.14_whole_genome_shotgun_sequence|gi|257431371|ref|NZ_GG700587.1|	2.936	97.064	2321	76725	79046
Staphylococcus_#_aureus_!_subsp._{_aureus_}_M876_genomic_scaffold_supercont1.12_whole_genome_shotgun_sequence|gi|257436992|ref|NZ_GG700625.1|	2.9	97.1	2321	77704	80025
Streptococcus_#_oralis_!_Uo5_{_complete_}_genome|gi|331265438|ref|NC_015291.1|	0.118	99.882	2308	1956382	1958690
Streptococcus_#_pneumoniae_!_G54_{_chromosome_}_complete_genome|gi|194396645|ref|NC_011072.1|	0.111	99.889	2308	2076645	2078953
Staphylococcus_#_aureus_!_M1016_{_genomic_}_scaffold_acvqx-supercont1.5_whole_genome_shotgun_sequence|gi|486406776|ref|NZ_KB821846.1|	0.168	99.832	2304	1369474	1371778
Staphylococcus_#_aureus_!_subsp._{_aureus_}_WW2703/97_genomic_scaffold_supercont1.11_whole_genome_shotgun_sequence|gi|282907983|ref|NZ_GG730230.1|	16.83	83.17	2297	11351	13648
Staphylococcus_#_aureus_!_M0374_{_genomic_}_scaffold_aculK-supercont1.1_whole_genome_shotgun_sequence|gi|487365394|ref|NZ_KB821278.1|	0.219	99.781	2290	1043160	1045450
Staphylococcus_#_aureus_!_M1578_{_genomic_}_scaffold_aculL-supercont1.2_whole_genome_shotgun_sequence|gi|487219486|ref|NZ_KB822321.1|	0.221	99.779	2290	1035786	1038076
Staphylococcus_#_aureus_!_M0438_{_genomic_}_scaffold_acuml-supercont1.4_whole_genome_shotgun_sequence|gi|487368753|ref|NZ_KB821353.1|	0.207	99.793	2282	1102585	1104867
Tetragenococcus_#_halophilus_!_NBRC_{_12172_}_complete_genome|gi|352516173|ref|NC_016052.1|	0.089	99.911	2280	2560440	2562720
Staphylococcus_#_aureus_!_M0351_{_genomic_}_scaffold_acunV-supercont1.7_whole_genome_shotgun_sequence|gi|487364468|ref|NZ_KB821261.1|	0.158	99.842	2269	1434562	1436831
Staphylococcus_#_aureus_!_subsp._{_aureus_}_MRSA131_genomic_scaffold_Scfld383_whole_genome_shotgun_sequence|gi|422747240|ref|NZ_GL638196.1|	5.862	94.138	2267	36409	38676
Staphylococcus_#_aureus_!_subsp._{_aureus_}_MRSA177_genomic_scaffold_Scfld39_whole_genome_shotgun_sequence|gi|422742487|ref|NZ_GL638204.1|	5.87	94.13	2267	36351	38618
Staphylococcus_#_aureus_!_M0424_{_genomic_}_scaffold_acunn-supercont1.2_whole_genome_shotgun_sequence|gi|487367927|ref|NZ_KB821338.1|	5.764	94.236	2266	37044	39310
Bacillus_#_thuringiensis_!_serovar_{_finitimus_}_YBT-020_chromosome_complete_genome|gi|384177910|ref|NC_017200.1|	0.042	99.958	2258	5353232	5355490
Staphylococcus_#_aureus_!_M0154_{_genomic_}_scaffold_acumB-supercont1.8_whole_genome_shotgun_sequence|gi|487359822|ref|NZ_KB821052.1|	0.157	99.843	2253	1435714	1437967
Staphylococcus_#_aureus_!_M1244_{_genomic_}_scaffold_acumu-supercont1.1_whole_genome_shotgun_sequence|gi|487396874|ref|NZ_KB822086.1|	0.715	99.285	2244	311547	313791
Bacillus_#_amyloliquefaciens_!_subsp._{_plantarum_}_UCMB5036_complete_genome|gi|452854062|ref|NC_020410.1|	0.057	99.943	2232	3908092	3910324
Bacillus_#_cereus_!_BAG2O-3_{_genomic_}_scaffold_acfXF-supercont1.1_whole_genome_shotgun_sequence|gi|507017505|ref|NZ_KB976530.1|	0.042	99.958	2228	5325781	5328009
Bacillus_#_amyloliquefaciens_!_FZB42_{_complete_}_genome|gi|154684518|ref|NC_009725.1|	0.057	99.943	2220	3916369	3918589
Staphylococcus_#_aureus_!_M0770_{_genomic_}_scaffold_acvra-supercont1.1_whole_genome_shotgun_sequence|gi|480449782|ref|NZ_KB821638.1|	0.157	99.843	2218	1414118	1416336
Staphylococcus_#_aureus_!_subsp._{_aureus_}_68-397_genomic_scaffold_supercont1.12_whole_genome_shotgun_sequence|gi|257431274|ref|NZ_GG700585.1|	2.48	97.52	2215	87109	89324
Staphylococcus_#_aureus_!_subsp._{_aureus_}_M876_genomic_scaffold_supercont1.11_whole_genome_shotgun_sequence|gi|257436896|ref|NZ_GG700624.1|	2.478	97.522	2215	87189	89404
Staphylococcus_#_aureus_!_M0102_{_genomic_}_scaffold_acqwC-supercont1.5_whole_genome_shotgun_sequence|gi|486240844|ref|NZ_KB821010.1|	1.227	98.773	2210	177889	180099
Staphylococcus_#_aureus_!_M0329_{_genomic_}_scaffold_acrHa-supercont1.8_whole_genome_shotgun_sequence|gi|486276071|ref|NZ_KB821232.1|	2.45	97.55	2210	87998	90208
Staphylococcus_#_aureus_!_M1142_{_genomic_}_scaffold_acumk-supercont1.2_whole_genome_shotgun_sequence|gi|487396191|ref|NZ_KB821989.1|	0.177	99.823	2206	1241188	1243394
Staphylococcus_#_aureus_!_M0075_{_genomic_}_scaffold_acunI-supercont1.1_whole_genome_shotgun_sequence|gi|487399773|ref|NZ_KB822347.1|	0.206	99.794	2189	1061632	1063821
Staphylococcus_#_caprae_!_C87_{_genomic_}_scaffold_supercont1.12_whole_genome_shotgun_sequence|gi|314934230|ref|NZ_GL545278.1|	0.247	99.753	2187	882689	884876
Staphylococcus_#_aureus_!_M0391_{_genomic_}_scaffold_acqwG-supercont1.7_whole_genome_shotgun_sequence|gi|486291809|ref|NZ_KB821315.1|	0.24	99.76	2186	909253	911439
Melissococcus_#_plutonius_!_ATCC_{_35311_}_chromosome_complete_genome|gi|332685534|ref|NC_015516.1|	0.115	99.885	2176	1888838	1891014
Staphylococcus_#_aureus_!_M0006_{_genomic_}_scaffold_aculO-supercont1.1_whole_genome_shotgun_sequence|gi|487242216|ref|NZ_KB820952.1|	0.167	99.833	2174	1295753	1297927
Staphylococcus_#_epidermidis_!_Scl25_{_genomic_}_scaffold_Scl25_scaffold130_whole_genome_shotgun_sequence|gi|520978689|ref|NZ_KE367458.1|	34.728	65.272	2167	4073	6240
Bacillus_#_thuringiensis_!_serovar_{_chinensis_}_CT-43_chromosome_complete_genome|gi|384184088|ref|NC_017208.1|	0.039	99.961	2158	5484672	5486830
Staphylococcus_#_aureus_!_M0529_{_genomic_}_scaffold_acumA-supercont1.4_whole_genome_shotgun_sequence|gi|486414553|ref|NZ_KB821434.1|	0.46	99.54	2154	466153	468307
Staphylococcus_#_aureus_!_M0177_{_genomic_}_scaffold_acumi-supercont1.2_whole_genome_shotgun_sequence|gi|487360048|ref|NZ_KB821079.1|	0.207	99.793	2153	1036582	1038735
Staphylococcus_#_aureus_!_M0213_{_genomic_}_scaffold_acqwL-supercont1.3_whole_genome_shotgun_sequence|gi|487373880|ref|NZ_KB821117.1|	0.151	99.849	2152	1426737	1428889
Anoxybacillus_#_flavithermus_!_WK1_{_chromosome_}_complete_genome|gi|212637849|ref|NC_011567.1|	0.075	99.925	2144	2844602	2846746
Staphylococcus_#_aureus_!_M0171_{_genomic_}_scaffold_acqwu-supercont1.1_whole_genome_shotgun_sequence|gi|487372817|ref|NZ_KB821061.1|	0.183	99.817	2132	1161368	1163500
Bacillus_#_amyloliquefaciens_!_subsp._{_plantarum_}_YAU_B9601-Y2_complete_genome|gi|384263631|ref|NC_017061.1|	0.05	99.95	2130	4240644	4242774
Bacillus_#_subtilis_!_subsp._{_subtilis_}_str._RO-NN-1_chromosome_complete_genome|gi|384173661|ref|NC_017195.1|	0.053	99.947	2130	4009819	4011949
Staphylococcus_#_aureus_!_M0240_{_genomic_}_scaffold_acqwO-supercont1.11_whole_genome_shotgun_sequence|gi|487374136|ref|NZ_KB821145.1|	0.304	99.696	2121	695598	697719
Staphylococcus_#_aureus_!_M0478_{_genomic_}_scaffold_acrGZ-supercont1.4_whole_genome_shotgun_sequence|gi|486312219|ref|NZ_KB821379.1|	0.349	99.651	2121	606128	608249
Staphylococcus_#_aureus_!_M0216_{_genomic_}_scaffold_acumr-supercont1.1_whole_genome_shotgun_sequence|gi|487361292|ref|NZ_KB821119.1|	0.147	99.853	2119	1435464	1437583
Staphylococcus_#_aureus_!_subsp._{_aureus_}_55/2053_genomic_scaffold_supercont1.8_whole_genome_shotgun_sequence|gi|257425991|ref|NZ_GG700540.1|	2.422	97.578	2116	85266	87382
Staphylococcus_#_aureus_!_subsp._{_aureus_}_C101_genomic_scaffold_supercont1.14_whole_genome_shotgun_sequence|gi|282925097|ref|NZ_GG730133.1|	2.366	97.634	2115	87266	89381
Staphylococcus_#_aureus_!_subsp._{_aureus_}_M1015_genomic_scaffold_supercont1.12_whole_genome_shotgun_sequence|gi|293539290|ref|NZ_GG749007.1|	2.364	97.636	2115	87345	89460
Staphylococcus_#_aureus_!_subsp._{_aureus_}_M899_genomic_scaffold_supercont1.9_whole_genome_shotgun_sequence|gi|282914656|ref|NZ_GG730198.1|	2.362	97.638	2115	87436	89551
Staphylococcus_#_aureus_!_M0329_{_genomic_}_scaffold_acrHa-supercont1.9_whole_genome_shotgun_sequence|gi|486276662|ref|NZ_KB821233.1|	0.284	99.716	2103	737114	739217
Staphylococcus_#_aureus_!_M0237_{_genomic_}_scaffold_acrHd-supercont1.4_whole_genome_shotgun_sequence|gi|486261514|ref|NZ_KB821136.1|	0.23	99.77	2086	903653	905739
Bacillus_#_subtilis_!_XF-1_{_complete_}_genome|gi|449092714|ref|NC_020244.1|	0.051	99.949	2085	4059101	4061186
Staphylococcus_#_aureus_!_M1291_{_genomic_}_scaffold_acumW-supercont1.6_whole_genome_shotgun_sequence|gi|486811309|ref|NZ_KB822171.1|	0.17	99.83	2082	1226125	1228207
Staphylococcus_#_aureus_!_M1277_{_genomic_}_scaffold_acung-supercont1.2_whole_genome_shotgun_sequence|gi|486747506|ref|NZ_KB822137.1|	0.195	99.805	2053	1051849	1053902
Bacillus_#_cereus_!_BAG1O-3_{_genomic_}_scaffold_supercont1.2_whole_genome_shotgun_sequence|gi|514961978|ref|NZ_KE332537.1|	0.305	99.695	2019	661016	663035
Staphylococcus_#_aureus_!_M0799_{_genomic_}_scaffold_acvqq-supercont1.1_whole_genome_shotgun_sequence|gi|486378646|ref|NZ_KB821650.1|	0.187	99.813	2019	1079483	1081502
Staphylococcus_#_aureus_!_M0294_{_genomic_}_scaffold_acumG-supercont1.1_whole_genome_shotgun_sequence|gi|487400027|ref|NZ_KB822352.1|	0.147	99.853	2018	1375176	1377194
Staphylococcus_#_epidermidis_!_M0881_{_genomic_}_scaffold_acumm-supercont1.2_whole_genome_shotgun_sequence|gi|489046772|ref|NZ_KB821722.1|	0.224	99.776	2018	898451	900469
Lactobacillus_#_plantarum_!_JDM1_{_complete_}_genome|gi|254555169|ref|NC_012984.1|	0.063	99.937	2005	3195754	3197759
Lactobacillus_#_plantarum_!_subsp._{_plantarum_}_P-8_complete_genome|gi|501145339|ref|NC_021224.1|	0.066	99.934	2005	3031561	3033566
Lactobacillus_#_plantarum_!_subsp._{_plantarum_}_ST-III_chromosome_complete_genome|gi|308179191|ref|NC_014554.1|	0.062	99.938	2005	3252371	3254376
Streptococcus_#_pneumoniae_!_SPN994039_{_draft_}_genome|gi|480530348|ref|NC_021005.1|	0.099	99.901	2004	2024501	2026505
Bacillus_#_cellulosilyticus_!_DSM_{_2522_}_chromosome_complete_genome|gi|317126741|ref|NC_014829.1|	0.043	99.957	2000	4679672	4681672
Clostridium_#_botulinum_!_BKT015925_{_chromosome_}_complete_genome|gi|331268188|ref|NC_015425.1|	0.072	99.928	2000	2771157	2773157
Staphylococcus_#_aureus_!_subsp._{_aureus_}_MRSA177_genomic_scaffold_Scfld315_whole_genome_shotgun_sequence|gi|422744035|ref|NZ_GL638232.1|	7.803	92.197	1993	23548	25541
Staphylococcus_#_aureus_!_M0460_{_genomic_}_scaffold_acqxK-supercont1.2_whole_genome_shotgun_sequence|gi|487379866|ref|NZ_KB821364.1|	0.186	99.814	1991	1069415	1071406
Staphylococcus_#_aureus_!_M1093_{_genomic_}_scaffold_acumQ-supercont1.5_whole_genome_shotgun_sequence|gi|486424990|ref|NZ_KB821950.1|	0.151	99.849	1982	1312652	1314634
Staphylococcus_#_aureus_!_M1257_{_genomic_}_scaffold_acumo-supercont1.4_whole_genome_shotgun_sequence|gi|486728319|ref|NZ_KB822128.1|	0.183	99.817	1982	1080886	1082868
Staphylococcus_#_aureus_!_M0510_{_genomic_}_scaffold_acumF-supercont1.4_whole_genome_shotgun_sequence|gi|487369183|ref|NZ_KB821410.1|	0.125	99.875	1981	1587478	1589459
Staphylococcus_#_aureus_!_M1198_{_genomic_}_scaffold_acumf-supercont1.3_whole_genome_shotgun_sequence|gi|486436221|ref|NZ_KB822053.1|	0.112	99.888	1962	1754319	1756281
Staphylococcus_#_aureus_!_M1078_{_genomic_}_scaffold_aculT-supercont1.2_whole_genome_shotgun_sequence|gi|487400778|ref|NZ_KB822363.1|	0.222	99.778	1952	875520	877472
Staphylococcus_#_aureus_!_M0687_{_genomic_}_scaffold_acvqC-supercont1.8_whole_genome_shotgun_sequence|gi|486367392|ref|NZ_KB821584.1|	0.208	99.792	1950	937441	939391
Staphylococcus_#_aureus_!_M0279_{_genomic_}_scaffold_acqxn-supercont1.3_whole_genome_shotgun_sequence|gi|487376092|ref|NZ_KB821176.1|	0.175	99.825	1948	1112526	1114474
Listeria_#_monocytogenes_!_10403S_{_chromosome_}_complete_genome|gi|386042347|ref|NC_017544.1|	0.067	99.933	1932	2901174	2903106
Listeria_#_monocytogenes_!_FSL_{_R2-561_}_chromosome_complete_genome|gi|386048930|ref|NC_017546.1|	0.065	99.935	1932	2971869	2973801
Staphylococcus_#_aureus_!_M0144_{_genomic_}_scaffold_acunq-supercont1.1_whole_genome_shotgun_sequence|gi|487359044|ref|NZ_KB821038.1|	0.142	99.858	1919	1347115	1349034
Staphylococcus_#_aureus_!_M0104_{_genomic_}_scaffold_acrHp-supercont1.1_whole_genome_shotgun_sequence|gi|487372340|ref|NZ_KB821023.1|	0.148	99.852	1918	1293983	1295901
Staphylococcus_#_aureus_!_M0539_{_genomic_}_scaffold_acvqn-supercont1.1_whole_genome_shotgun_sequence|gi|486346615|ref|NZ_KB821450.1|	0.176	99.824	1918	1087026	1088944
Bacillus_#_subtilis_!_subsp._{_subtilis_}_str._BAB-1_complete_genome|gi|472328503|ref|NC_020832.1|	0.048	99.952	1917	4020027	4021944
Streptococcus_#_pneumoniae_!_D39_{_chromosome_}_complete_genome|gi|116515308|ref|NC_008533.1|	0.093	99.907	1908	2044207	2046115
Streptococcus_#_suis_!_BM407_{_chromosome_}_complete_genome|gi|253754647|ref|NC_012926.1|	0.089	99.911	1908	2144321	2146229
[truncated: 2,191 more rows]

## Sheet: 100K
Organism	Genome_Coverage(%)	Genome_Not_Covered(%)	Genome_Coverage	Genome_Not_Covered	Genome_Size
[truncated: 3,771 more rows]

[truncated: 1 more sheets: 250K]
