# Supplementary material for: MetaGeniE: Characterizing Human Clinical Samples Using Deep Metagenomic Sequencing
Source: PLoS One. 2014 Nov 3;9(11):e110915. doi: 10.1371/journal.pone.0110915 (PMC4218713; doi:10.1371/journal.pone.0110915)
Supplement: Table S6 — Detection of close relative in co-infection library consisting of Staphylococcus aureus Newman and Staphylococcus aureus TCH1516. (XLSX) [file pone.0110915.s012.xlsx]

## Sheet: 100
Organism	Genome_Coverage(%)	Genome_Not_Covered(%)	Genome_Coverage	Genome_Not_Covered	Genome_Size
Staphylococcus_#_aureus_!_subsp._{_aureus_}_str._Newman_chromosome_complete_genome|gi|151220212|ref|NC_009641.1|	0.69	99.31	19863	2859034	2878897
Staphylococcus_#_aureus_!_subsp._{_aureus_}_USA300_TCH1516_chromosome_complete_genome|gi|161508266|ref|NC_010079.1|	0.681	99.319	19564	2853351	2872915
Staphylococcus_#_aureus_!_subsp._{_aureus_}_USA300_FPR3757_chromosome_complete_genome|gi|87159884|ref|NC_007793.1|	0.678	99.322	19464	2853305	2872769
Staphylococcus_#_aureus_!_M1_{_complete_}_genome|gi|479328021|ref|NC_021059.1|	0.662	99.338	18963	2845162	2864125
Staphylococcus_#_aureus_!_subsp._{_aureus_}_COL_chromosome_complete_genome|gi|57650036|ref|NC_002951.2|	0.675	99.325	18963	2790459	2809422
Staphylococcus_#_aureus_!_subsp._{_aureus_}_NCTC_8325_chromosome_complete_genome|gi|88193823|ref|NC_007795.1|	0.672	99.328	18963	2802398	2821361
Staphylococcus_#_aureus_!_subsp._{_aureus_}_VC40_chromosome_complete_genome|gi|379013365|ref|NC_016912.1|	0.686	99.314	18463	2674107	2692570
Staphylococcus_#_aureus_!_subsp._{_aureus_}_JH9_chromosome_complete_genome|gi|148266447|ref|NC_009487.1|	0.632	99.368	18362	2888338	2906700
Staphylococcus_#_aureus_!_subsp._{_aureus_}_11819-97_chromosome_complete_genome|gi|385780298|ref|NC_017351.1|	0.645	99.355	18361	2828185	2846546
Staphylococcus_#_aureus_!_Bmb9393_{_complete_}_genome|gi|521210823|ref|NC_021670.1|	0.606	99.394	18064	2962484	2980548
Staphylococcus_#_aureus_!_subsp._{_aureus_}_MW2_complete_genome|gi|21281729|ref|NC_003923.1|	0.64	99.36	18063	2802399	2820462
Staphylococcus_#_aureus_!_subsp._{_aureus_}_ED98_complete_genome|gi|269201690|ref|NC_013450.1|	0.639	99.361	18062	2806342	2824404
Staphylococcus_#_aureus_!_subsp._{_aureus_}_N315_chromosome_complete_genome|gi|29165615|ref|NC_002745.2|	0.638	99.362	17963	2796853	2814816
Staphylococcus_#_aureus_!_subsp._{_aureus_}_ST228_complete_genome_isolate_10388|gi|470190315|ref|NC_020529.1|	0.644	99.356	17762	2741748	2759510
Staphylococcus_#_aureus_!_subsp._{_aureus_}_ST228_complete_genome_isolate_10497|gi|470217946|ref|NC_020564.1|	0.644	99.356	17762	2741750	2759512
Staphylococcus_#_aureus_!_subsp._{_aureus_}_ST228_complete_genome_isolate_15532|gi|470192280|ref|NC_020532.1|	0.644	99.356	17762	2742121	2759883
Staphylococcus_#_aureus_!_subsp._{_aureus_}_ST228_complete_genome_isolate_16035|gi|470194245|ref|NC_020533.1|	0.644	99.356	17762	2742073	2759835
Staphylococcus_#_aureus_!_subsp._{_aureus_}_ST228_complete_genome_isolate_16125|gi|470221770|ref|NC_020566.1|	0.644	99.356	17762	2741695	2759457
Staphylococcus_#_aureus_!_subsp._{_aureus_}_ST228_complete_genome_isolate_18341|gi|470196211|ref|NC_020536.1|	0.644	99.356	17762	2741711	2759473
Staphylococcus_#_aureus_!_subsp._{_aureus_}_ST228_complete_genome_isolate_18412|gi|470198176|ref|NC_020537.1|	0.644	99.356	17762	2741501	2759263
Staphylococcus_#_aureus_!_subsp._{_aureus_}_ST228_complete_genome_isolate_18583|gi|470223734|ref|NC_020568.1|	0.644	99.356	17762	2741566	2759328
Staphylococcus_#_aureus_!_subsp._{_aureus_}_TW20_complete_genome|gi|387141638|ref|NC_017331.1|	0.58	99.42	17663	3025547	3043210
Staphylococcus_#_aureus_!_subsp._{_aureus_}_T0131_chromosome_complete_genome|gi|384868588|ref|NC_017347.1|	0.603	99.397	17564	2896336	2913900
Staphylococcus_#_aureus_!_subsp._{_aureus_}_str._JKD6008_chromosome_complete_genome|gi|384860682|ref|NC_017341.1|	0.597	99.403	17463	2906881	2924344
Staphylococcus_#_aureus_!_M0235_{_genomic_}_scaffold_acumc-supercont1.1_whole_genome_shotgun_sequence|gi|487361831|ref|NZ_KB821130.1|	0.618	99.382	17462	2809614	2827076
Staphylococcus_#_aureus_!_subsp._{_aureus_}_MSSA476_chromosome_complete_genome|gi|49484912|ref|NC_002953.3|	0.617	99.383	17263	2782539	2799802
Staphylococcus_#_aureus_!_M1216_{_genomic_}_scaffold_acumJ-supercont-complete_whole_genome_shotgun_sequence|gi|493203888|ref|NZ_KB822075.1|	0.604	99.396	16862	2776513	2793375
Staphylococcus_#_aureus_!_subsp._{_aureus_}_Mu50_chromosome_complete_genome|gi|57634611|ref|NC_002758.2|	0.577	99.423	16602	2861927	2878529
Staphylococcus_#_aureus_!_subsp._{_aureus_}_Mu3_complete_genome|gi|156978331|ref|NC_009782.1|	0.573	99.427	16502	2863666	2880168
Staphylococcus_#_aureus_!_subsp._{_aureus_}_ECT-R_2_complete_genome|gi|384863396|ref|NC_017343.1|	0.597	99.403	16302	2713238	2729540
Staphylococcus_#_aureus_!_subsp._{_aureus_}_JH1_chromosome_complete_genome|gi|150392480|ref|NC_009632.1|	0.561	99.439	16302	2890205	2906507
Staphylococcus_#_aureus_!_CA-347_{_complete_}_genome|gi|514064966|ref|NC_021554.1|	0.571	99.429	16264	2834239	2850503
Staphylococcus_#_aureus_!_04-02981_{_chromosome_}_complete_genome|gi|387149188|ref|NC_017340.1|	0.567	99.433	16002	2805450	2821452
Staphylococcus_#_aureus_!_08BA02176_{_chromosome_}_complete_genome|gi|404477334|ref|NC_018608.1|	0.546	99.454	15203	2767110	2782313
Staphylococcus_#_aureus_!_subsp._{_aureus_}_HO_5096_0412_complete_genome|gi|386829725|ref|NC_017763.1|	0.504	99.496	14263	2818036	2832299
Staphylococcus_#_aureus_!_subsp._{_aureus_}_MRSA252_chromosome_complete_genome|gi|49482253|ref|NC_002952.2|	0.465	99.535	13504	2889115	2902619
Staphylococcus_#_aureus_!_subsp._{_aureus_}_ED133_chromosome_complete_genome|gi|384546269|ref|NC_017337.1|	0.441	99.559	12503	2819975	2832478
Staphylococcus_#_aureus_!_subsp._{_aureus_}_TCH60_chromosome_complete_genome|gi|384865886|ref|NC_017342.1|	0.439	99.561	12304	2790371	2802675
Staphylococcus_#_aureus_!_subsp._{_aureus_}_LGA251_complete_genome|gi|387779217|ref|NC_017349.1|	0.447	99.553	12303	2738531	2750834
Staphylococcus_#_aureus_!_subsp._{_aureus_}_ST398_complete_genome|gi|387601291|ref|NC_017333.1|	0.428	99.572	12302	2860280	2872582
Staphylococcus_#_aureus_!_subsp._{_aureus_}_71193_chromosome_complete_genome|gi|386727822|ref|NC_017673.1|	0.449	99.551	12202	2702798	2715000
Staphylococcus_#_aureus_!_RF122_{_complete_}_genome|gi|82749777|ref|NC_007622.1|	0.427	99.573	11703	2730828	2742531
Staphylococcus_#_aureus_!_subsp._{_aureus_}_JKD6159_chromosome_complete_genome|gi|384548923|ref|NC_017338.1|	0.416	99.584	11703	2799732	2811435
Staphylococcus_#_aureus_!_subsp._{_aureus_}_M013_chromosome_complete_genome|gi|379019812|ref|NC_016928.1|	0.416	99.584	11604	2777032	2788636
Staphylococcus_#_aureus_!_M0580_{_genomic_}_scaffold_acvrg-supercont1.2_whole_genome_shotgun_sequence|gi|486357261|ref|NZ_KB821487.1|	0.564	99.436	8303	1462880	1471183
Staphylococcus_#_aureus_!_M0173_{_genomic_}_scaffold_acrHj-supercont1.2_whole_genome_shotgun_sequence|gi|486253586|ref|NZ_KB821071.1|	0.758	99.242	8060	1055607	1063667
Staphylococcus_#_aureus_!_M1373_{_genomic_}_scaffold_acumD-supercont1.4_whole_genome_shotgun_sequence|gi|488719292|ref|NZ_KB822213.1|	0.641	99.359	7761	1203149	1210910
Staphylococcus_#_aureus_!_M0326_{_genomic_}_scaffold_acrHf-supercont1.2_whole_genome_shotgun_sequence|gi|486268272|ref|NZ_KB821203.1|	0.625	99.375	7661	1217678	1225339
Staphylococcus_#_aureus_!_M1188_{_genomic_}_scaffold_acumb-supercont1.2_whole_genome_shotgun_sequence|gi|493196425|ref|NZ_KB822058.1|	0.622	99.378	7561	1208496	1216057
Staphylococcus_#_aureus_!_M0450_{_genomic_}_scaffold_acqwq-supercont1.3_whole_genome_shotgun_sequence|gi|486302842|ref|NZ_KB821345.1|	0.657	99.343	7359	1113504	1120863
Staphylococcus_#_aureus_!_M1188_{_genomic_}_scaffold_acumb-supercont1.4_whole_genome_shotgun_sequence|gi|493198238|ref|NZ_KB822060.1|	0.544	99.456	6702	1225017	1231719
Staphylococcus_#_aureus_!_M0695_{_genomic_}_scaffold_acunx-supercont1.4_whole_genome_shotgun_sequence|gi|489045023|ref|NZ_KB821609.1|	0.691	99.309	6361	914204	920565
Staphylococcus_#_aureus_!_M0998_{_genomic_}_scaffold_acvqv-supercont1.6_whole_genome_shotgun_sequence|gi|486398674|ref|NZ_KB821818.1|	0.557	99.443	6002	1071331	1077333
Staphylococcus_#_aureus_!_M0823_{_genomic_}_scaffold_acvqk-supercont1.8_whole_genome_shotgun_sequence|gi|486383952|ref|NZ_KB821698.1|	0.613	99.387	5501	892316	897817
Staphylococcus_#_aureus_!_HI049C_{_genomic_}_scaffold_acqxH-supercont1.1_whole_genome_shotgun_sequence|gi|486211608|ref|NZ_KB820909.1|	0.189	99.811	5464	2883906	2889370
Staphylococcus_#_aureus_!_M0769_{_genomic_}_scaffold_acvqF-supercont1.7_whole_genome_shotgun_sequence|gi|480448432|ref|NZ_KB821635.1|	0.577	99.423	5301	913073	918374
Staphylococcus_#_aureus_!_HI010_{_genomic_}_scaffold_acqxi-supercont1.1_whole_genome_shotgun_sequence|gi|486203361|ref|NZ_KB820894.1|	0.183	99.817	5263	2867099	2872362
Staphylococcus_#_aureus_!_HI049B_{_genomic_}_scaffold_acqxg-supercont1.1_whole_genome_shotgun_sequence|gi|486205205|ref|NZ_KB820906.1|	0.182	99.818	5263	2884263	2889526
Staphylococcus_#_aureus_!_M0531_{_genomic_}_scaffold_acvqQ-supercont1.1_whole_genome_shotgun_sequence|gi|486342614|ref|NZ_KB821438.1|	0.185	99.815	5262	2836012	2841274
Staphylococcus_#_aureus_!_M0831_{_genomic_}_scaffold_acumY-supercont-complete_whole_genome_shotgun_sequence|gi|487384247|ref|NZ_KB821688.1|	0.175	99.825	5162	2952619	2957781
Staphylococcus_#_aureus_!_M0055_{_genomic_}_scaffold_acumI-supercont1.1_whole_genome_shotgun_sequence|gi|487290252|ref|NZ_KB820976.1|	0.173	99.827	5062	2921777	2926839
Staphylococcus_#_aureus_!_M0221_{_genomic_}_scaffold_acqxa-supercont1.2_whole_genome_shotgun_sequence|gi|486259720|ref|NZ_KB821124.1|	0.176	99.824	5062	2867057	2872119
Staphylococcus_#_aureus_!_M0312_{_genomic_}_scaffold_acqxO-supercont1.1_whole_genome_shotgun_sequence|gi|487376936|ref|NZ_KB821215.1|	0.172	99.828	5062	2938673	2943735
Staphylococcus_#_aureus_!_M0468_{_genomic_}_scaffold_acqxk-supercont1.2_whole_genome_shotgun_sequence|gi|486310012|ref|NZ_KB821359.1|	0.172	99.828	5060	2939120	2944180
Staphylococcus_#_aureus_!_HI111_{_genomic_}_scaffold_acqwe-supercont1.1_whole_genome_shotgun_sequence|gi|486214133|ref|NZ_KB820916.1|	0.175	99.825	4962	2827564	2832526
Staphylococcus_#_aureus_!_M0695_{_genomic_}_scaffold_acunx-supercont1.18_whole_genome_shotgun_sequence|gi|489044982|ref|NZ_KB821605.1|	0.614	99.386	4901	793680	798581
Staphylococcus_#_aureus_!_HI022_{_genomic_}_scaffold_acqwY-supercont1.1_whole_genome_shotgun_sequence|gi|486209995|ref|NZ_KB820903.1|	0.172	99.828	4862	2814007	2818869
Staphylococcus_#_aureus_!_subsp._{_aureus_}_55/2053_genomic_scaffold_supercont1.1_whole_genome_shotgun_sequence|gi|257423656|ref|NZ_GG700533.1|	0.468	99.532	4802	1022024	1026826
Staphylococcus_#_aureus_!_M1286_{_genomic_}_scaffold_acuob-supercont1.10_whole_genome_shotgun_sequence|gi|487397932|ref|NZ_KB822142.1|	0.607	99.393	4801	785503	790304
Staphylococcus_#_aureus_!_HIF003_B2N-C_{_genomic_}_scaffold_acqxV-supercont1.1_whole_genome_shotgun_sequence|gi|486209139|ref|NZ_KB820925.1|	0.169	99.831	4662	2750334	2754996
Staphylococcus_#_aureus_!_M0340_{_genomic_}_scaffold_acqxN-supercont1.2_whole_genome_shotgun_sequence|gi|486280931|ref|NZ_KB821242.1|	0.171	99.829	4662	2728275	2732937
Staphylococcus_#_aureus_!_M1462_{_genomic_}_scaffold_acumH-supercont1.3_whole_genome_shotgun_sequence|gi|487135576|ref|NZ_KB822552.1|	0.181	99.819	4363	2407202	2411565
Staphylococcus_#_aureus_!_subsp._{_aureus_}_ATCC_BAA-39_genomic_scaffold_SCAFFOLD1_whole_genome_shotgun_sequence|gi|305431397|ref|NZ_GL397103.1|	0.144	99.856	4163	2895949	2900112
Staphylococcus_#_aureus_!_M1015_{_genomic_}_scaffold_acvqH-supercont1.4_whole_genome_shotgun_sequence|gi|486404434|ref|NZ_KB821837.1|	0.674	99.326	4001	589199	593200
Staphylococcus_#_aureus_!_M0695_{_genomic_}_scaffold_acunx-supercont1.5_whole_genome_shotgun_sequence|gi|489045039|ref|NZ_KB821610.1|	0.699	99.301	4000	568245	572245
Staphylococcus_#_aureus_!_M0602_{_genomic_}_scaffold_acvqp-supercont1.2_whole_genome_shotgun_sequence|gi|486358344|ref|NZ_KB821494.1|	0.655	99.345	3701	561757	565458
Staphylococcus_#_aureus_!_HI168_{_genomic_}_scaffold_acqxp-supercont1.3_whole_genome_shotgun_sequence|gi|486213000|ref|NZ_KB820921.1|	0.191	99.809	3362	1759697	1763059
Staphylococcus_#_aureus_!_M1188_{_genomic_}_scaffold_acumb-supercont1.3_whole_genome_shotgun_sequence|gi|493196995|ref|NZ_KB822059.1|	0.805	99.195	3299	406278	409577
Staphylococcus_#_aureus_!_HI049_{_genomic_}_scaffold_acqxW-supercont1.1_whole_genome_shotgun_sequence|gi|486200690|ref|NZ_KB820912.1|	0.182	99.818	3162	1731116	1734278
Staphylococcus_#_aureus_!_HI013_{_genomic_}_scaffold_acqwl-supercont1.2_whole_genome_shotgun_sequence|gi|486215615|ref|NZ_KB820899.1|	0.184	99.816	3062	1661861	1664923
Staphylococcus_#_aureus_!_M0633_{_genomic_}_scaffold_acyCm-supercont1.2_whole_genome_shotgun_sequence|gi|487371925|ref|NZ_KB821508.1|	0.205	99.795	3062	1487262	1490324
Staphylococcus_#_aureus_!_M1007_{_genomic_}_scaffold_acvqZ-supercont1.3_whole_genome_shotgun_sequence|gi|486401503|ref|NZ_KB821831.1|	0.183	99.817	3062	1672378	1675440
Staphylococcus_#_aureus_!_M1223_{_genomic_}_scaffold_acune-supercont1.3_whole_genome_shotgun_sequence|gi|487396419|ref|NZ_KB822073.1|	0.184	99.816	3062	1663539	1666601
Staphylococcus_#_aureus_!_M0239_{_genomic_}_scaffold_acqxh-supercont1.1_whole_genome_shotgun_sequence|gi|486264624|ref|NZ_KB821128.1|	0.106	99.894	2901	2723660	2726561
Staphylococcus_#_aureus_!_M0424_{_genomic_}_scaffold_acunn-supercont1.3_whole_genome_shotgun_sequence|gi|487368144|ref|NZ_KB821339.1|	0.19	99.81	2862	1500179	1503041
Staphylococcus_#_aureus_!_M1064_{_genomic_}_scaffold_acumU-supercont1.6_whole_genome_shotgun_sequence|gi|486420802|ref|NZ_KB821942.1|	0.191	99.809	2862	1494905	1497767
Staphylococcus_#_aureus_!_subsp._{_aureus_}_TCH70_genomic_scaffold_SCAFFOLD1_whole_genome_shotgun_sequence|gi|311744845|ref|NZ_GL538356.1|	0.096	99.904	2663	2783915	2786578
Staphylococcus_#_aureus_!_subsp._{_aureus_}_MN8_chromosome_whole_genome_shotgun_sequence|gi|298527634|ref|NZ_CM000952.1|	0.086	99.914	2501	2897087	2899588
Staphylococcus_#_aureus_!_M0177_{_genomic_}_scaffold_acumi-supercont1.1_whole_genome_shotgun_sequence|gi|487359982|ref|NZ_KB821078.1|	0.55	99.45	2401	433990	436391
Staphylococcus_#_aureus_!_M1373_{_genomic_}_scaffold_acumD-supercont1.5_whole_genome_shotgun_sequence|gi|488719293|ref|NZ_KB822214.1|	1.065	98.935	2400	222937	225337
Staphylococcus_#_aureus_!_HI013_{_genomic_}_scaffold_acqwl-supercont1.1_whole_genome_shotgun_sequence|gi|486215046|ref|NZ_KB820898.1|	0.202	99.798	2301	1135060	1137361
Staphylococcus_#_aureus_!_HI049_{_genomic_}_scaffold_acqxW-supercont1.2_whole_genome_shotgun_sequence|gi|486202079|ref|NZ_KB820913.1|	0.194	99.806	2201	1135198	1137399
Staphylococcus_#_aureus_!_HI168_{_genomic_}_scaffold_acqxp-supercont1.1_whole_genome_shotgun_sequence|gi|486212462|ref|NZ_KB820919.1|	0.201	99.799	2201	1093437	1095638
Staphylococcus_#_aureus_!_M0328_{_genomic_}_scaffold_acrGR-supercont1.1_whole_genome_shotgun_sequence|gi|486271607|ref|NZ_KB821211.1|	0.592	99.408	2101	352751	354852
Staphylococcus_#_aureus_!_M0513_{_genomic_}_scaffold_acumP-supercont-complete_whole_genome_shotgun_sequence|gi|487369849|ref|NZ_KB821413.1|	0.072	99.928	2101	2930749	2932850
Staphylococcus_#_aureus_!_subsp._{_aureus_}_M809_genomic_scaffold_supercont1.8_whole_genome_shotgun_sequence|gi|293509340|ref|NZ_GG749306.1|	0.475	99.525	1902	398524	400426
Staphylococcus_#_aureus_!_subsp._{_aureus_}_LCT-SA112_Scaffold1_whole_genome_shotgun_sequence|gi|452721112|ref|NZ_JH691956.1|	0.069	99.931	1901	2757530	2759431
Staphylococcus_#_aureus_!_M1007_{_genomic_}_scaffold_acvqZ-supercont1.1_whole_genome_shotgun_sequence|gi|486400527|ref|NZ_KB821829.1|	0.171	99.829	1900	1108994	1110894
Staphylococcus_#_aureus_!_M1223_{_genomic_}_scaffold_acune-supercont1.1_whole_genome_shotgun_sequence|gi|487396341|ref|NZ_KB822071.1|	0.154	99.846	1800	1167637	1169437
Staphylococcus_#_epidermidis_!_RP62A_{_complete_}_genome|gi|57865352|ref|NC_002976.3|	0.065	99.935	1701	2614829	2616530
Staphylococcus_#_aureus_!_M0424_{_genomic_}_scaffold_acunn-supercont1.1_whole_genome_shotgun_sequence|gi|487367914|ref|NZ_KB821337.1|	0.152	99.848	1700	1115305	1117005
Staphylococcus_#_aureus_!_subsp._{_aureus_}_ATCC_51811_genomic_scaffold_SCAFFOLD1_whole_genome_shotgun_sequence|gi|297210119|ref|NZ_GG774480.1|	0.119	99.881	1663	1398642	1400305
Staphylococcus_#_aureus_!_M1228_{_genomic_}_scaffold_acunW-supercont1.2_whole_genome_shotgun_sequence|gi|487401372|ref|NZ_KB822377.1|	0.106	99.894	1661	1566350	1568011
Staphylococcus_#_epidermidis_!_ATCC_{_12228_}_chromosome_complete_genome|gi|27466918|ref|NC_004461.1|	0.064	99.936	1600	2497679	2499279
Staphylococcus_#_aureus_!_M1373_{_genomic_}_scaffold_acumD-supercont1.7_whole_genome_shotgun_sequence|gi|488719319|ref|NZ_KB822216.1|	0.5	99.5	1499	298449	299948
Staphylococcus_#_aureus_!_M0396_{_genomic_}_scaffold_acunf-supercont1.4_whole_genome_shotgun_sequence|gi|487367492|ref|NZ_KB821299.1|	0.092	99.908	1461	1590810	1592271
Staphylococcus_#_aureus_!_M1064_{_genomic_}_scaffold_acumU-supercont1.1_whole_genome_shotgun_sequence|gi|486419252|ref|NZ_KB821934.1|	0.155	99.845	1400	899966	901366
Staphylococcus_#_aureus_!_M0633_{_genomic_}_scaffold_acyCm-supercont1.4_whole_genome_shotgun_sequence|gi|487372090|ref|NZ_KB821510.1|	0.2	99.8	1300	648389	649689
Staphylococcus_#_aureus_!_subsp._{_aureus_}_MSHR1132_complete_genome|gi|379794527|ref|NC_016941.1|	0.047	99.953	1300	2761485	2762785
Staphylococcus_#_aureus_!_M0877_{_genomic_}_scaffold_acumt-supercont1.5_whole_genome_shotgun_sequence|gi|487385357|ref|NZ_KB821718.1|	0.087	99.913	1202	1388359	1389561
Staphylococcus_#_aureus_!_subsp._{_aureus_}_USA300_TCH959_genomic_scaffold_SCAFFOLD2_whole_genome_shotgun_sequence|gi|255926318|ref|NZ_GG697986.1|	0.118	99.882	1200	1017047	1018247
Staphylococcus_#_aureus_!_subsp._{_aureus_}_MRSA131_genomic_scaffold_Scfld83_whole_genome_shotgun_sequence|gi|422745409|ref|NZ_GL638175.1|	0.238	99.762	1162	487215	488377
Staphylococcus_#_aureus_!_subsp._{_aureus_}_E1410_genomic_scaffold_supercont1.7_whole_genome_shotgun_sequence|gi|257433049|ref|NZ_GG700603.1|	0.111	99.889	1101	993782	994883
Staphylococcus_#_aureus_!_subsp._{_aureus_}_USA300_TCH959_genomic_scaffold_SCAFFOLD1_whole_genome_shotgun_sequence|gi|255926317|ref|NZ_GG697985.1|	0.079	99.921	1101	1397685	1398786
Staphylococcus_#_aureus_!_M0695_{_genomic_}_scaffold_acunx-supercont1.1_whole_genome_shotgun_sequence|gi|489044929|ref|NZ_KB821596.1|	0.348	99.652	1100	315368	316468
Staphylococcus_#_aureus_!_M0396_{_genomic_}_scaffold_acunf-supercont1.2_whole_genome_shotgun_sequence|gi|487367086|ref|NZ_KB821297.1|	0.135	99.865	1000	739867	740867
Staphylococcus_#_aureus_!_M1256_{_genomic_}_scaffold_acunO-supercont1.1_whole_genome_shotgun_sequence|gi|487397331|ref|NZ_KB822114.1|	0.073	99.927	1000	1372896	1373896
Staphylococcus_#_aureus_!_M0408_{_genomic_}_scaffold_acrHk-supercont1.4_whole_genome_shotgun_sequence|gi|486296790|ref|NZ_KB821329.1|	0.081	99.919	901	1111603	1112504
Staphylococcus_#_aureus_!_M0946_{_genomic_}_scaffold_acunJ-supercont1.6_whole_genome_shotgun_sequence|gi|487388144|ref|NZ_KB821791.1|	0.113	99.887	901	795445	796346
Staphylococcus_#_aureus_!_M1034_{_genomic_}_scaffold_acumn-supercont1.7_whole_genome_shotgun_sequence|gi|487391726|ref|NZ_KB821858.1|	0.103	99.897	901	877438	878339
Staphylococcus_#_aureus_!_M1256_{_genomic_}_scaffold_acunO-supercont1.2_whole_genome_shotgun_sequence|gi|487397459|ref|NZ_KB822115.1|	0.063	99.937	901	1428327	1429228
Staphylococcus_#_aureus_!_subsp._{_aureus_}_65-1322_genomic_scaffold_supercont1.6_whole_genome_shotgun_sequence|gi|257427710|ref|NZ_GG700564.1|	0.09	99.91	901	1003986	1004887
Staphylococcus_#_aureus_!_subsp._{_aureus_}_A017934/97_genomic_scaffold_supercont1.9_whole_genome_shotgun_sequence|gi|283957738|ref|NZ_GG731503.1|	0.092	99.908	901	974111	975012
Staphylococcus_#_aureus_!_subsp._{_aureus_}_Btn1260_genomic_scaffold_supercont1.7_whole_genome_shotgun_sequence|gi|282905315|ref|NZ_GG730262.1|	0.088	99.912	901	1017386	1018287
Staphylococcus_#_aureus_!_subsp._{_aureus_}_C160_genomic_scaffold_supercont1.7_whole_genome_shotgun_sequence|gi|282903541|ref|NZ_GG730279.1|	0.092	99.908	901	974059	974960
Staphylococcus_#_aureus_!_subsp._{_aureus_}_EMRSA16_genomic_scaffold_supercont1.10_whole_genome_shotgun_sequence|gi|295427484|ref|NZ_GG770522.1|	0.114	99.886	901	786456	787357
Staphylococcus_#_aureus_!_M0408_{_genomic_}_scaffold_acrHk-supercont1.1_whole_genome_shotgun_sequence|gi|486293955|ref|NZ_KB821326.1|	0.075	99.925	900	1206823	1207723
Staphylococcus_#_aureus_!_M0695_{_genomic_}_scaffold_acunx-supercont1.2_whole_genome_shotgun_sequence|gi|489044993|ref|NZ_KB821607.1|	0.547	99.453	900	163593	164493
Staphylococcus_#_aureus_!_M1034_{_genomic_}_scaffold_acumn-supercont1.1_whole_genome_shotgun_sequence|gi|487391239|ref|NZ_KB821848.1|	0.089	99.911	900	1008336	1009236
Staphylococcus_#_aureus_!_subsp._{_aureus_}_ATCC_51811_genomic_scaffold_SCAFFOLD2_whole_genome_shotgun_sequence|gi|297210120|ref|NZ_GG774481.1|	0.079	99.921	900	1141311	1142211
Staphylococcus_#_aureus_!_subsp._{_aureus_}_M809_genomic_scaffold_supercont1.25_whole_genome_shotgun_sequence|gi|293511363|ref|NZ_GG749323.1|	0.163	99.837	900	552420	553320
Staphylococcus_#_aureus_!_subsp._{_aureus_}_WBG10049_genomic_scaffold_supercont1.11_whole_genome_shotgun_sequence|gi|282911740|ref|NZ_GG730218.1|	0.087	99.913	900	1037388	1038288
Staphylococcus_#_aureus_!_subsp._{_aureus_}_H19_genomic_scaffold_supercont1.8_whole_genome_shotgun_sequence|gi|283769672|ref|NZ_GG730342.1|	0.058	99.942	802	1385533	1386335
Staphylococcus_#_aureus_!_subsp._{_aureus_}_C427_genomic_scaffold_supercont1.8_whole_genome_shotgun_sequence|gi|282918694|ref|NZ_GG730148.1|	0.08	99.92	801	996309	997110
Staphylococcus_#_aureus_!_M1462_{_genomic_}_scaffold_acumH-supercont1.1_whole_genome_shotgun_sequence|gi|487135346|ref|NZ_KB822550.1|	0.158	99.842	800	506138	506938
Staphylococcus_#_aureus_!_subsp._{_aureus_}_58-424_genomic_scaffold_supercont1.3_whole_genome_shotgun_sequence|gi|293497427|ref|NZ_GG749056.1|	0.078	99.922	800	1024406	1025206
Staphylococcus_#_aureus_!_subsp._{_aureus_}_65-1322_genomic_scaffold_supercont1.2_whole_genome_shotgun_sequence|gi|257426332|ref|NZ_GG700560.1|	0.078	99.922	800	1019544	1020344
Staphylococcus_#_aureus_!_subsp._{_aureus_}_68-397_genomic_scaffold_supercont1.1_whole_genome_shotgun_sequence|gi|257428975|ref|NZ_GG700574.1|	0.079	99.921	800	1012840	1013640
Staphylococcus_#_aureus_!_subsp._{_aureus_}_A017934/97_genomic_scaffold_supercont1.19_whole_genome_shotgun_sequence|gi|283958999|ref|NZ_GG731513.1|	0.081	99.919	800	991641	992441
Staphylococcus_#_aureus_!_subsp._{_aureus_}_Btn1260_genomic_scaffold_supercont1.14_whole_genome_shotgun_sequence|gi|282906513|ref|NZ_GG730269.1|	0.078	99.922	800	1027379	1028179
Staphylococcus_#_aureus_!_subsp._{_aureus_}_C101_genomic_scaffold_supercont1.2_whole_genome_shotgun_sequence|gi|282922348|ref|NZ_GG730121.1|	0.122	99.878	800	655847	656647
Staphylococcus_#_aureus_!_subsp._{_aureus_}_E1410_genomic_scaffold_supercont1.2_whole_genome_shotgun_sequence|gi|257431621|ref|NZ_GG700598.1|	0.076	99.924	800	1056826	1057626
Staphylococcus_#_aureus_!_subsp._{_aureus_}_M1015_genomic_scaffold_supercont1.19_whole_genome_shotgun_sequence|gi|293549604|ref|NZ_GG749014.1|	0.079	99.921	800	1015843	1016643
Staphylococcus_#_aureus_!_subsp._{_aureus_}_M876_genomic_scaffold_supercont1.2_whole_genome_shotgun_sequence|gi|257434580|ref|NZ_GG700615.1|	0.079	99.921	800	1014440	1015240
Staphylococcus_#_aureus_!_subsp._{_aureus_}_M899_genomic_scaffold_supercont1.2_whole_genome_shotgun_sequence|gi|282912717|ref|NZ_GG730191.1|	0.122	99.878	800	652749	653549
Staphylococcus_#_aureus_!_M1255_{_genomic_}_scaffold_acunA-supercont1.5_whole_genome_shotgun_sequence|gi|486688395|ref|NZ_KB822120.1|	0.457	99.543	799	173970	174769
Staphylococcus_#_aureus_!_subsp._{_aureus_}_58-424_genomic_scaffold_supercont1.6_whole_genome_shotgun_sequence|gi|293500395|ref|NZ_GG749059.1|	0.07	99.93	701	1006374	1007075
Staphylococcus_#_aureus_!_subsp._{_aureus_}_68-397_genomic_scaffold_supercont1.6_whole_genome_shotgun_sequence|gi|257430345|ref|NZ_GG700579.1|	0.121	99.879	701	578921	579622
Staphylococcus_#_aureus_!_subsp._{_aureus_}_M1015_genomic_scaffold_supercont1.6_whole_genome_shotgun_sequence|gi|293526348|ref|NZ_GG749001.1|	0.149	99.851	701	469580	470281
Staphylococcus_#_aureus_!_subsp._{_aureus_}_M876_genomic_scaffold_supercont1.6_whole_genome_shotgun_sequence|gi|257435946|ref|NZ_GG700619.1|	0.122	99.878	701	574183	574884
Staphylococcus_#_aureus_!_subsp._{_aureus_}_M899_genomic_scaffold_supercont1.7_whole_genome_shotgun_sequence|gi|282913769|ref|NZ_GG730196.1|	0.122	99.878	701	575422	576123
Staphylococcus_#_aureus_!_M0326_{_genomic_}_scaffold_acrHf-supercont1.7_whole_genome_shotgun_sequence|gi|486269445|ref|NZ_KB821208.1|	0.771	99.229	700	90120	90820
Staphylococcus_#_aureus_!_M0455_{_genomic_}_scaffold_acqxx-supercont1.1_whole_genome_shotgun_sequence|gi|487379684|ref|NZ_KB821355.1|	0.026	99.974	700	2725940	2726640
Staphylococcus_#_aureus_!_M1309_{_genomic_}_scaffold_acunC-supercont1.6_whole_genome_shotgun_sequence|gi|487398463|ref|NZ_KB822161.1|	0.593	99.407	700	117274	117974
Staphylococcus_#_aureus_!_subsp._{_aureus_}_MRSA131_genomic_scaffold_Scfld122_whole_genome_shotgun_sequence|gi|422746016|ref|NZ_GL638181.1|	0.203	99.797	700	344819	345519
Staphylococcus_#_aureus_!_subsp._{_aureus_}_MRSA131_genomic_scaffold_Scfld55_whole_genome_shotgun_sequence|gi|422745238|ref|NZ_GL638171.1|	0.522	99.478	700	133477	134177
Staphylococcus_#_aureus_!_subsp._{_aureus_}_TCH130_genomic_scaffold_SCAFFOLD1_whole_genome_shotgun_sequence|gi|255925763|ref|NZ_GG698158.1|	0.101	99.899	700	689722	690422
Staphylococcus_#_aureus_!_M0494_{_genomic_}_scaffold_acqyb-supercont1.1_whole_genome_shotgun_sequence|gi|486320731|ref|NZ_KB821405.1|	0.022	99.978	601	2782701	2783302
Staphylococcus_#_aureus_!_M1311_{_genomic_}_scaffold_aculZ-supercont1.5_whole_genome_shotgun_sequence|gi|486843581|ref|NZ_KB822179.1|	0.103	99.897	601	582315	582916
Staphylococcus_#_aureus_!_subsp._{_aureus_}_55/2053_genomic_scaffold_supercont1.5_whole_genome_shotgun_sequence|gi|257425216|ref|NZ_GG700537.1|	0.15	99.85	601	398946	399547
Staphylococcus_#_aureus_!_subsp._{_aureus_}_WBG10049_genomic_scaffold_supercont1.4_whole_genome_shotgun_sequence|gi|282910573|ref|NZ_GG730211.1|	0.147	99.853	601	408152	408753
Staphylococcus_#_aureus_!_M0536_{_genomic_}_scaffold_acvqu-supercont1.3_whole_genome_shotgun_sequence|gi|486345866|ref|NZ_KB821468.1|	0.028	99.972	600	2175211	2175811
Staphylococcus_#_aureus_!_M0633_{_genomic_}_scaffold_acyCm-supercont1.1_whole_genome_shotgun_sequence|gi|487371765|ref|NZ_KB821507.1|	0.112	99.888	600	533920	534520
Staphylococcus_#_aureus_!_M0946_{_genomic_}_scaffold_acunJ-supercont1.3_whole_genome_shotgun_sequence|gi|487387957|ref|NZ_KB821788.1|	0.096	99.904	600	622430	623030
Staphylococcus_#_aureus_!_M1373_{_genomic_}_scaffold_acumD-supercont1.6_whole_genome_shotgun_sequence|gi|488719299|ref|NZ_KB822215.1|	0.776	99.224	600	76758	77358
Staphylococcus_#_aureus_!_subsp._{_aureus_}_EMRSA16_genomic_scaffold_supercont1.20_whole_genome_shotgun_sequence|gi|295428968|ref|NZ_GG770532.1|	0.146	99.854	600	411728	412328
Staphylococcus_#_aureus_!_subsp._{_aureus_}_MRSA131_genomic_scaffold_Scfld482_whole_genome_shotgun_sequence|gi|422747280|ref|NZ_GL638197.1|	0.31	99.69	600	192792	193392
Staphylococcus_#_aureus_!_subsp._{_aureus_}_MRSA177_genomic_scaffold_Scfld173_whole_genome_shotgun_sequence|gi|422743415|ref|NZ_GL638224.1|	0.192	99.808	600	312271	312871
Staphylococcus_#_aureus_!_M1253_{_genomic_}_scaffold_acunj-supercont1.1_whole_genome_shotgun_sequence|gi|486669659|ref|NZ_KB822112.1|	0.017	99.983	501	2882963	2883464
Staphylococcus_#_aureus_!_subsp._{_aureus_}_D139_genomic_scaffold_supercont1.17_whole_genome_shotgun_sequence|gi|282916507|ref|NZ_GG730175.1|	0.072	99.928	501	696372	696873
Staphylococcus_#_aureus_!_subsp._{_aureus_}_M809_genomic_scaffold_supercont1.11_whole_genome_shotgun_sequence|gi|293509961|ref|NZ_GG749309.1|	0.138	99.862	501	361870	362371
Staphylococcus_#_aureus_!_M0035_{_genomic_}_scaffold_acqxl-supercont1.2_whole_genome_shotgun_sequence|gi|486228657|ref|NZ_KB820966.1|	0.017	99.983	500	2860295	2860795
Staphylococcus_#_aureus_!_M0306_{_genomic_}_scaffold_acunR-supercont1.1_whole_genome_shotgun_sequence|gi|487363159|ref|NZ_KB821198.1|	0.017	99.983	500	2873506	2874006
Staphylococcus_#_aureus_!_M0363_{_genomic_}_scaffold_acunN-supercont1.2_whole_genome_shotgun_sequence|gi|487364822|ref|NZ_KB821272.1|	0.018	99.982	500	2846972	2847472
Staphylococcus_#_aureus_!_M0584_{_genomic_}_scaffold_acunu-supercont1.3_whole_genome_shotgun_sequence|gi|487371238|ref|NZ_KB821491.1|	0.043	99.957	500	1149875	1150375
Staphylococcus_#_aureus_!_M0633_{_genomic_}_scaffold_acyCm-supercont1.3_whole_genome_shotgun_sequence|gi|487371977|ref|NZ_KB821509.1|	0.166	99.834	500	301153	301653
Staphylococcus_#_aureus_!_M0687_{_genomic_}_scaffold_acvqC-supercont1.5_whole_genome_shotgun_sequence|gi|486366366|ref|NZ_KB821581.1|	0.035	99.965	500	1428007	1428507
Staphylococcus_#_aureus_!_M1228_{_genomic_}_scaffold_acunW-supercont1.1_whole_genome_shotgun_sequence|gi|487401221|ref|NZ_KB822376.1|	0.041	99.959	500	1231527	1232027
Staphylococcus_#_aureus_!_subsp._{_aureus_}_C101_genomic_scaffold_supercont1.8_whole_genome_shotgun_sequence|gi|282923802|ref|NZ_GG730127.1|	0.139	99.861	500	358947	359447
Staphylococcus_#_aureus_!_subsp._{_aureus_}_C160_genomic_scaffold_supercont1.2_whole_genome_shotgun_sequence|gi|282902071|ref|NZ_GG730274.1|	0.048	99.952	500	1041324	1041824
Staphylococcus_#_aureus_!_subsp._{_aureus_}_C427_genomic_scaffold_supercont1.18_whole_genome_shotgun_sequence|gi|282920745|ref|NZ_GG730158.1|	0.05	99.95	500	993154	993654
Staphylococcus_#_aureus_!_subsp._{_aureus_}_TCH130_genomic_scaffold_SCAFFOLD2_whole_genome_shotgun_sequence|gi|255925764|ref|NZ_GG698159.1|	0.079	99.921	500	634268	634768
Staphylococcus_#_aureus_!_subsp._{_aureus_}_WW2703/97_genomic_scaffold_supercont1.36_whole_genome_shotgun_sequence|gi|282909938|ref|NZ_GG730255.1|	0.238	99.762	500	209517	210017
Staphylococcus_#_epidermidis_!_M0881_{_genomic_}_scaffold_acumm-supercont1.6_whole_genome_shotgun_sequence|gi|489048088|ref|NZ_KB821726.1|	0.05	99.95	500	1004714	1005214
Staphylococcus_#_aureus_!_subsp._{_aureus_}_MRSA177_genomic_scaffold_Scfld52_whole_genome_shotgun_sequence|gi|422742750|ref|NZ_GL638208.1|	0.406	99.594	461	112967	113428
Staphylococcus_#_aureus_!_M0216_{_genomic_}_scaffold_acumr-supercont1.1_whole_genome_shotgun_sequence|gi|487361292|ref|NZ_KB821119.1|	0.028	99.972	400	1437183	1437583
Staphylococcus_#_aureus_!_M0391_{_genomic_}_scaffold_acqwG-supercont1.7_whole_genome_shotgun_sequence|gi|486291809|ref|NZ_KB821315.1|	0.044	99.956	400	911039	911439
Staphylococcus_#_aureus_!_M0396_{_genomic_}_scaffold_acunf-supercont1.3_whole_genome_shotgun_sequence|gi|487367179|ref|NZ_KB821298.1|	0.096	99.904	400	414887	415287
Staphylococcus_#_aureus_!_M0424_{_genomic_}_scaffold_acunn-supercont1.4_whole_genome_shotgun_sequence|gi|487368234|ref|NZ_KB821340.1|	0.135	99.865	400	296683	297083
Staphylococcus_#_aureus_!_M0460_{_genomic_}_scaffold_acqxK-supercont1.2_whole_genome_shotgun_sequence|gi|487379866|ref|NZ_KB821364.1|	0.037	99.963	400	1071006	1071406
Staphylococcus_#_aureus_!_M0586_{_genomic_}_scaffold_acunQ-supercont1.1_whole_genome_shotgun_sequence|gi|487371607|ref|NZ_KB821500.1|	0.014	99.986	400	2927624	2928024
Staphylococcus_#_aureus_!_M0877_{_genomic_}_scaffold_acumt-supercont1.2_whole_genome_shotgun_sequence|gi|487385040|ref|NZ_KB821715.1|	0.037	99.963	400	1068282	1068682
Staphylococcus_#_aureus_!_M0934_{_genomic_}_scaffold_acvqs-supercont1.1_whole_genome_shotgun_sequence|gi|486387797|ref|NZ_KB821760.1|	0.018	99.982	400	2202637	2203037
Staphylococcus_#_aureus_!_M1309_{_genomic_}_scaffold_acunC-supercont1.3_whole_genome_shotgun_sequence|gi|487398415|ref|NZ_KB822158.1|	0.033	99.967	400	1229125	1229525
Staphylococcus_#_aureus_!_M1367_{_genomic_}_scaffold_acumK-supercont1.2_whole_genome_shotgun_sequence|gi|487027023|ref|NZ_KB822208.1|	0.014	99.986	400	2874056	2874456
Staphylococcus_#_aureus_!_subsp._{_aureus_}_H19_genomic_scaffold_supercont1.2_whole_genome_shotgun_sequence|gi|283767263|ref|NZ_GG730336.1|	0.039	99.961	400	1019551	1019951
Staphylococcus_#_aureus_!_subsp._{_aureus_}_MRSA131_genomic_scaffold_Scfld545_whole_genome_shotgun_sequence|gi|422747480|ref|NZ_GL638198.1|	0.136	99.864	400	294492	294892
Staphylococcus_#_aureus_!_subsp._{_aureus_}_MRSA177_genomic_scaffold_Scfld14_whole_genome_shotgun_sequence|gi|422742133|ref|NZ_GL638200.1|	0.279	99.721	400	143082	143482
Staphylococcus_#_aureus_!_subsp._{_aureus_}_MRSA177_genomic_scaffold_Scfld16_whole_genome_shotgun_sequence|gi|422742271|ref|NZ_GL638201.1|	0.882	99.118	400	44946	45346
Staphylococcus_#_aureus_!_subsp._{_aureus_}_MRSA177_genomic_scaffold_Scfld209_whole_genome_shotgun_sequence|gi|422743733|ref|NZ_GL638226.1|	0.356	99.644	400	111825	112225
Staphylococcus_#_aureus_!_subsp._{_aureus_}_MRSA177_genomic_scaffold_Scfld42_whole_genome_shotgun_sequence|gi|422742527|ref|NZ_GL638205.1|	0.198	99.802	400	201118	201518
Staphylococcus_#_aureus_!_subsp._{_aureus_}_C101_genomic_scaffold_supercont1.9_whole_genome_shotgun_sequence|gi|282924193|ref|NZ_GG730128.1|	0.135	99.865	301	223059	223360
Staphylococcus_#_aureus_!_M0102_{_genomic_}_scaffold_acqwC-supercont1.4_whole_genome_shotgun_sequence|gi|486240581|ref|NZ_KB821009.1|	0.022	99.978	300	1375738	1376038
Staphylococcus_#_aureus_!_M0108_{_genomic_}_scaffold_acunZ-supercont1.4_whole_genome_shotgun_sequence|gi|487358654|ref|NZ_KB821036.1|	0.051	99.949	300	590698	590998
Staphylococcus_#_aureus_!_M0108_{_genomic_}_scaffold_acunZ-supercont1.5_whole_genome_shotgun_sequence|gi|487358807|ref|NZ_KB821037.1|	0.026	99.974	300	1160803	1161103
Staphylococcus_#_aureus_!_M0171_{_genomic_}_scaffold_acqwu-supercont1.1_whole_genome_shotgun_sequence|gi|487372817|ref|NZ_KB821061.1|	0.026	99.974	300	1163200	1163500
Staphylococcus_#_aureus_!_M0237_{_genomic_}_scaffold_acrHd-supercont1.4_whole_genome_shotgun_sequence|gi|486261514|ref|NZ_KB821136.1|	0.033	99.967	300	905439	905739
Staphylococcus_#_aureus_!_M0279_{_genomic_}_scaffold_acqxn-supercont1.2_whole_genome_shotgun_sequence|gi|487375990|ref|NZ_KB821175.1|	0.017	99.983	300	1738215	1738515
Staphylococcus_#_aureus_!_M0329_{_genomic_}_scaffold_acrHa-supercont1.7_whole_genome_shotgun_sequence|gi|486275406|ref|NZ_KB821231.1|	0.032	99.968	300	930545	930845
Staphylococcus_#_aureus_!_M0350_{_genomic_}_scaffold_acunH-supercont1.2_whole_genome_shotgun_sequence|gi|487364069|ref|NZ_KB821251.1|	0.011	99.989	300	2711054	2711354
Staphylococcus_#_aureus_!_M0510_{_genomic_}_scaffold_acumF-supercont1.3_whole_genome_shotgun_sequence|gi|487369026|ref|NZ_KB821409.1|	0.023	99.977	300	1322707	1323007
Staphylococcus_#_aureus_!_M0676_{_genomic_}_scaffold_acvqP-supercont1.2_whole_genome_shotgun_sequence|gi|486363747|ref|NZ_KB821572.1|	0.046	99.954	300	653291	653591
Staphylococcus_#_aureus_!_M0770_{_genomic_}_scaffold_acvra-supercont1.1_whole_genome_shotgun_sequence|gi|480449782|ref|NZ_KB821638.1|	0.021	99.979	300	1416036	1416336
Staphylococcus_#_aureus_!_M0871_{_genomic_}_scaffold_acumy-supercont1.2_whole_genome_shotgun_sequence|gi|487384489|ref|NZ_KB821702.1|	0.053	99.947	300	561245	561545
Staphylococcus_#_aureus_!_M0934_{_genomic_}_scaffold_acvqs-supercont1.2_whole_genome_shotgun_sequence|gi|486388784|ref|NZ_KB821761.1|	0.043	99.957	300	702562	702862
Staphylococcus_#_aureus_!_M0946_{_genomic_}_scaffold_acunJ-supercont1.4_whole_genome_shotgun_sequence|gi|487388014|ref|NZ_KB821789.1|	0.095	99.905	300	314913	315213
Staphylococcus_#_aureus_!_M0964_{_genomic_}_scaffold_aculV-supercont1.5_whole_genome_shotgun_sequence|gi|487388602|ref|NZ_KB821805.1|	0.024	99.976	300	1259851	1260151
Staphylococcus_#_aureus_!_M1015_{_genomic_}_scaffold_acvqH-supercont1.5_whole_genome_shotgun_sequence|gi|486404951|ref|NZ_KB821838.1|	0.03	99.97	300	991724	992024
Staphylococcus_#_aureus_!_M1064_{_genomic_}_scaffold_acumU-supercont1.3_whole_genome_shotgun_sequence|gi|486419946|ref|NZ_KB821939.1|	0.13	99.87	300	230565	230865
Staphylococcus_#_aureus_!_M1083_{_genomic_}_scaffold_acumj-supercont1.2_whole_genome_shotgun_sequence|gi|487394735|ref|NZ_KB821968.1|	0.053	99.947	300	568792	569092
Staphylococcus_#_aureus_!_M1092_{_genomic_}_scaffold_acunK-supercont1.4_whole_genome_shotgun_sequence|gi|486422720|ref|NZ_KB821960.1|	0.028	99.972	300	1088382	1088682
Staphylococcus_#_aureus_!_M1199_{_genomic_}_scaffold_acunF-supercont1.1_whole_genome_shotgun_sequence|gi|486447954|ref|NZ_KB822062.1|	0.013	99.987	300	2322237	2322537
Staphylococcus_#_aureus_!_M1311_{_genomic_}_scaffold_aculZ-supercont1.3_whole_genome_shotgun_sequence|gi|486835574|ref|NZ_KB822177.1|	0.023	99.977	300	1293612	1293912
Staphylococcus_#_aureus_!_M1321_{_genomic_}_scaffold_acunh-supercont1.6_whole_genome_shotgun_sequence|gi|486924102|ref|NZ_KB822196.1|	0.047	99.953	300	640659	640959
Staphylococcus_#_aureus_!_M1359_{_genomic_}_scaffold_acumL-supercont1.1_whole_genome_shotgun_sequence|gi|486986178|ref|NZ_KB822204.1|	0.015	99.985	300	2029069	2029369
Staphylococcus_#_aureus_!_M1521_{_genomic_}_scaffold_acunr-supercont1.6_whole_genome_shotgun_sequence|gi|487137659|ref|NZ_KB822273.1|	0.018	99.982	300	1638750	1639050
Staphylococcus_#_aureus_!_M1531_{_genomic_}_scaffold_acunL-supercont1.2_whole_genome_shotgun_sequence|gi|487137933|ref|NZ_KB822264.1|	0.013	99.987	300	2385046	2385346
Staphylococcus_#_aureus_!_subsp._{_aureus_}_D139_genomic_scaffold_supercont1.25_whole_genome_shotgun_sequence|gi|282917720|ref|NZ_GG730183.1|	0.07	99.93	300	430392	430692
Staphylococcus_#_aureus_!_subsp._{_aureus_}_MRSA177_genomic_scaffold_Scfld20_whole_genome_shotgun_sequence|gi|422742311|ref|NZ_GL638202.1|	0.279	99.721	300	107387	107687
Staphylococcus_#_aureus_!_subsp._{_aureus_}_MRSA177_genomic_scaffold_Scfld22_whole_genome_shotgun_sequence|gi|422742404|ref|NZ_GL638203.1|	0.342	99.658	300	87321	87621
Staphylococcus_#_aureus_!_subsp._{_aureus_}_MRSA177_genomic_scaffold_Scfld78_whole_genome_shotgun_sequence|gi|422743378|ref|NZ_GL638219.1|	1.313	98.687	300	22551	22851
Staphylococcus_#_aureus_!_subsp._{_aureus_}_WW2703/97_genomic_scaffold_supercont1.14_whole_genome_shotgun_sequence|gi|282908455|ref|NZ_GG730233.1|	0.178	99.822	300	167814	168114
Staphylococcus_#_warneri_!_SG1_{_complete_}_genome|gi|445058371|ref|NC_020164.1|	0.012	99.988	300	2485742	2486042
Bacillus_#_megaterium_!_DSM_{_319_}_chromosome_complete_genome|gi|295702242|ref|NC_014103.1|	0.004	99.996	203	5097244	5097447
Bacillus_#_megaterium_!_QM_{_B1551_}_chromosome_complete_genome|gi|294496875|ref|NC_014019.1|	0.004	99.996	203	5096926	5097129
Staphylococcus_#_aureus_!_M1311_{_genomic_}_scaffold_aculZ-supercont1.6_whole_genome_shotgun_sequence|gi|486856699|ref|NZ_KB822180.1|	0.037	99.963	201	548581	548782
Staphylococcus_#_aureus_!_subsp._{_aureus_}_MRSA131_genomic_scaffold_Scfld179_whole_genome_shotgun_sequence|gi|422746581|ref|NZ_GL638183.1|	0.079	99.921	201	255278	255479
Staphylococcus_#_aureus_!_subsp._{_aureus_}_MRSA177_genomic_scaffold_Scfld582_whole_genome_shotgun_sequence|gi|422744652|ref|NZ_GL638246.1|	0.064	99.936	201	311749	311950
Staphylococcus_#_aureus_!_subsp._{_aureus_}_WW2703/97_genomic_scaffold_supercont1.23_whole_genome_shotgun_sequence|gi|282908628|ref|NZ_GG730242.1|	0.369	99.631	201	54223	54424
Staphylococcus_#_aureus_!_HI013_{_genomic_}_scaffold_acqwl-supercont1.3_whole_genome_shotgun_sequence|gi|486215850|ref|NZ_KB820900.1|	0.176	99.824	200	113466	113666
Staphylococcus_#_aureus_!_M0029_{_genomic_}_scaffold_acqwZ-supercont1.2_whole_genome_shotgun_sequence|gi|486225786|ref|NZ_KB820963.1|	0.007	99.993	200	2862979	2863179
Staphylococcus_#_aureus_!_M0045_{_genomic_}_scaffold_acqxU-supercont1.3_whole_genome_shotgun_sequence|gi|486231608|ref|NZ_KB820971.1|	0.009	99.991	200	2248617	2248817
Staphylococcus_#_aureus_!_M0060_{_genomic_}_scaffold_acrGU-supercont1.1_whole_genome_shotgun_sequence|gi|487315894|ref|NZ_KB820981.1|	0.011	99.989	200	1768862	1769062
Staphylococcus_#_aureus_!_M0075_{_genomic_}_scaffold_acunI-supercont1.1_whole_genome_shotgun_sequence|gi|487399773|ref|NZ_KB822347.1|	0.019	99.981	200	1063621	1063821
Staphylococcus_#_aureus_!_M0077_{_genomic_}_scaffold_acunP-supercont1.2_whole_genome_shotgun_sequence|gi|487350114|ref|NZ_KB821000.1|	0.016	99.984	200	1223461	1223661
Staphylococcus_#_aureus_!_M0177_{_genomic_}_scaffold_acumi-supercont1.2_whole_genome_shotgun_sequence|gi|487360048|ref|NZ_KB821079.1|	0.019	99.981	200	1038535	1038735
Staphylococcus_#_aureus_!_M0200_{_genomic_}_scaffold_acumC-supercont1.6_whole_genome_shotgun_sequence|gi|487360555|ref|NZ_KB821101.1|	0.016	99.984	200	1223069	1223269
Staphylococcus_#_aureus_!_M0250_{_genomic_}_scaffold_acuma-supercont1.1_whole_genome_shotgun_sequence|gi|487362212|ref|NZ_KB821141.1|	0.007	99.993	200	2868127	2868327
Staphylococcus_#_aureus_!_M0273_{_genomic_}_scaffold_acqxR-supercont1.3_whole_genome_shotgun_sequence|gi|487375416|ref|NZ_KB821169.1|	0.034	99.966	200	593431	593631
Staphylococcus_#_aureus_!_M0280_{_genomic_}_scaffold_acunT-supercont1.6_whole_genome_shotgun_sequence|gi|487362590|ref|NZ_KB821186.1|	0.021	99.979	200	930495	930695
Staphylococcus_#_aureus_!_M0288_{_genomic_}_scaffold_acqwg-supercont1.1_whole_genome_shotgun_sequence|gi|487376330|ref|NZ_KB821190.1|	0.016	99.984	200	1230851	1231051
Staphylococcus_#_aureus_!_M0288_{_genomic_}_scaffold_acqwg-supercont1.7_whole_genome_shotgun_sequence|gi|487376592|ref|NZ_KB821196.1|	0.017	99.983	200	1155488	1155688
Staphylococcus_#_aureus_!_M0294_{_genomic_}_scaffold_acumG-supercont1.7_whole_genome_shotgun_sequence|gi|487400143|ref|NZ_KB822359.1|	0.026	99.974	200	763605	763805
Staphylococcus_#_aureus_!_M0326_{_genomic_}_scaffold_acrHf-supercont1.8_whole_genome_shotgun_sequence|gi|486270247|ref|NZ_KB821209.1|	0.018	99.982	200	1117658	1117858
Staphylococcus_#_aureus_!_M0329_{_genomic_}_scaffold_acrHa-supercont1.6_whole_genome_shotgun_sequence|gi|486274654|ref|NZ_KB821230.1|	0.025	99.975	200	802414	802614
Staphylococcus_#_aureus_!_M0340_{_genomic_}_scaffold_acqxN-supercont1.3_whole_genome_shotgun_sequence|gi|486281296|ref|NZ_KB821243.1|	0.111	99.889	200	179714	179914
Staphylococcus_#_aureus_!_M0391_{_genomic_}_scaffold_acqwG-supercont1.8_whole_genome_shotgun_sequence|gi|486292280|ref|NZ_KB821316.1|	0.087	99.913	200	229073	229273
Staphylococcus_#_aureus_!_M0404_{_genomic_}_scaffold_acrGQ-supercont1.6_whole_genome_shotgun_sequence|gi|487378947|ref|NZ_KB821307.1|	0.014	99.986	200	1471008	1471208
Staphylococcus_#_aureus_!_M0450_{_genomic_}_scaffold_acqwq-supercont1.2_whole_genome_shotgun_sequence|gi|486302143|ref|NZ_KB821344.1|	0.031	99.969	200	644803	645003
Staphylococcus_#_aureus_!_M0478_{_genomic_}_scaffold_acrGZ-supercont1.4_whole_genome_shotgun_sequence|gi|486312219|ref|NZ_KB821379.1|	0.033	99.967	200	608049	608249
Staphylococcus_#_aureus_!_M0489_{_genomic_}_scaffold_acsPG-supercont1.8_whole_genome_shotgun_sequence|gi|486318205|ref|NZ_KB821399.1|	0.016	99.984	200	1270131	1270331
Staphylococcus_#_aureus_!_M0528_{_genomic_}_scaffold_acvqo-supercont1.7_whole_genome_shotgun_sequence|gi|486339825|ref|NZ_KB821428.1|	0.03	99.97	200	660797	660997
Staphylococcus_#_aureus_!_M0663_{_genomic_}_scaffold_acuoc-supercont1.13_whole_genome_shotgun_sequence|gi|487381874|ref|NZ_KB821550.1|	0.03	99.97	200	676069	676269
Staphylococcus_#_aureus_!_M0695_{_genomic_}_scaffold_acunx-supercont1.3_whole_genome_shotgun_sequence|gi|489044994|ref|NZ_KB821608.1|	0.442	99.558	200	45050	45250
Staphylococcus_#_aureus_!_M0792_{_genomic_}_scaffold_acuni-supercont1.6_whole_genome_shotgun_sequence|gi|487383103|ref|NZ_KB821676.1|	0.077	99.923	200	258984	259184
Staphylococcus_#_aureus_!_M0946_{_genomic_}_scaffold_acunJ-supercont1.2_whole_genome_shotgun_sequence|gi|487387889|ref|NZ_KB821787.1|	0.044	99.956	200	458288	458488
Staphylococcus_#_aureus_!_M0953_{_genomic_}_scaffold_acvql-supercont1.2_whole_genome_shotgun_sequence|gi|486396452|ref|NZ_KB821796.1|	0.014	99.986	200	1420897	1421097
Staphylococcus_#_aureus_!_M0999_{_genomic_}_scaffold_acvqG-supercont1.2_whole_genome_shotgun_sequence|gi|486399550|ref|NZ_KB821821.1|	0.014	99.986	200	1476880	1477080
Staphylococcus_#_aureus_!_M1007_{_genomic_}_scaffold_acvqZ-supercont1.4_whole_genome_shotgun_sequence|gi|486401664|ref|NZ_KB821832.1|	0.172	99.828	200	116079	116279
Staphylococcus_#_aureus_!_M1015_{_genomic_}_scaffold_acvqH-supercont1.3_whole_genome_shotgun_sequence|gi|486404102|ref|NZ_KB821836.1|	0.074	99.926	200	269611	269811
Staphylococcus_#_aureus_!_M1036_{_genomic_}_scaffold_acvqI-supercont1.3_whole_genome_shotgun_sequence|gi|486407745|ref|NZ_KB821864.1|	0.036	99.964	200	550519	550719
Staphylococcus_#_aureus_!_M1044_{_genomic_}_scaffold_acumE-supercont1.6_whole_genome_shotgun_sequence|gi|487392815|ref|NZ_KB821886.1|	0.032	99.968	200	628824	629024
Staphylococcus_#_aureus_!_M1044_{_genomic_}_scaffold_acumE-supercont1.7_whole_genome_shotgun_sequence|gi|487392928|ref|NZ_KB821887.1|	0.067	99.933	200	297430	297630
Staphylococcus_#_aureus_!_M1064_{_genomic_}_scaffold_acumU-supercont1.7_whole_genome_shotgun_sequence|gi|486421041|ref|NZ_KB821943.1|	0.112	99.888	200	177871	178071
Staphylococcus_#_aureus_!_M1064_{_genomic_}_scaffold_acumU-supercont1.8_whole_genome_shotgun_sequence|gi|486421189|ref|NZ_KB821944.1|	0.166	99.834	200	120039	120239
Staphylococcus_#_aureus_!_M1078_{_genomic_}_scaffold_aculT-supercont1.1_whole_genome_shotgun_sequence|gi|487400724|ref|NZ_KB822362.1|	0.036	99.964	200	555776	555976
Staphylococcus_#_aureus_!_M1093_{_genomic_}_scaffold_acumQ-supercont1.5_whole_genome_shotgun_sequence|gi|486424990|ref|NZ_KB821950.1|	0.015	99.985	200	1314434	1314634
Staphylococcus_#_aureus_!_M1095_{_genomic_}_scaffold_aculR-supercont1.4_whole_genome_shotgun_sequence|gi|486426334|ref|NZ_KB821982.1|	0.031	99.969	200	635487	635687
Staphylococcus_#_aureus_!_M1095_{_genomic_}_scaffold_aculR-supercont1.5_whole_genome_shotgun_sequence|gi|486426558|ref|NZ_KB821983.1|	0.086	99.914	200	233172	233372
Staphylococcus_#_aureus_!_M1193_{_genomic_}_scaffold_acunb-supercont1.1_whole_genome_shotgun_sequence|gi|487401055|ref|NZ_KB822373.1|	0.007	99.993	200	2844734	2844934
Staphylococcus_#_aureus_!_M1223_{_genomic_}_scaffold_acune-supercont1.4_whole_genome_shotgun_sequence|gi|487396450|ref|NZ_KB822074.1|	0.176	99.824	200	113169	113369
Staphylococcus_#_aureus_!_M1224_{_genomic_}_scaffold_acumM-supercont1.5_whole_genome_shotgun_sequence|gi|487396680|ref|NZ_KB822081.1|	0.137	99.863	200	145527	145727
Staphylococcus_#_aureus_!_M1224_{_genomic_}_scaffold_acumM-supercont1.6_whole_genome_shotgun_sequence|gi|487396747|ref|NZ_KB822082.1|	0.02	99.98	200	982272	982472
Staphylococcus_#_aureus_!_M1248_{_genomic_}_scaffold_acunw-supercont1.3_whole_genome_shotgun_sequence|gi|486648723|ref|NZ_KB822101.1|	0.027	99.973	200	741277	741477
Staphylococcus_#_aureus_!_M1255_{_genomic_}_scaffold_acunA-supercont1.3_whole_genome_shotgun_sequence|gi|486684463|ref|NZ_KB822118.1|	0.016	99.984	200	1262443	1262643
Staphylococcus_#_aureus_!_M1255_{_genomic_}_scaffold_acunA-supercont1.4_whole_genome_shotgun_sequence|gi|486687246|ref|NZ_KB822119.1|	0.087	99.913	200	231008	231208
Staphylococcus_#_aureus_!_M1257_{_genomic_}_scaffold_acumo-supercont1.4_whole_genome_shotgun_sequence|gi|486728319|ref|NZ_KB822128.1|	0.018	99.982	200	1082668	1082868
Staphylococcus_#_aureus_!_M1291_{_genomic_}_scaffold_acumW-supercont1.4_whole_genome_shotgun_sequence|gi|486791259|ref|NZ_KB822169.1|	0.087	99.913	200	230160	230360
Staphylococcus_#_aureus_!_M1311_{_genomic_}_scaffold_aculZ-supercont1.4_whole_genome_shotgun_sequence|gi|486840504|ref|NZ_KB822178.1|	0.053	99.947	200	375236	375436
Staphylococcus_#_aureus_!_M1321_{_genomic_}_scaffold_acunh-supercont1.5_whole_genome_shotgun_sequence|gi|486919067|ref|NZ_KB822195.1|	0.071	99.929	200	282279	282479
Staphylococcus_#_aureus_!_M1322_{_genomic_}_scaffold_acumT-supercont1.2_whole_genome_shotgun_sequence|gi|486956393|ref|NZ_KB822201.1|	0.008	99.992	200	2596404	2596604
Staphylococcus_#_aureus_!_M1394_{_genomic_}_scaffold_acuny-supercont1.1_whole_genome_shotgun_sequence|gi|487083277|ref|NZ_KB822228.1|	0.007	99.993	200	2816240	2816440
Staphylococcus_#_aureus_!_M1407_{_genomic_}_scaffold_acuod-supercont1.2_whole_genome_shotgun_sequence|gi|487401590|ref|NZ_KB822380.1|	0.024	99.976	200	841449	841649
Staphylococcus_#_aureus_!_M1407_{_genomic_}_scaffold_acuod-supercont1.3_whole_genome_shotgun_sequence|gi|487401610|ref|NZ_KB822381.1|	0.053	99.947	200	374621	374821
Staphylococcus_#_aureus_!_M1450_{_genomic_}_scaffold_acumw-supercont1.4_whole_genome_shotgun_sequence|gi|487125047|ref|NZ_KB822235.1|	0.088	99.912	200	226537	226737
Staphylococcus_#_aureus_!_M1451_{_genomic_}_scaffold_acunE-supercont1.4_whole_genome_shotgun_sequence|gi|480457480|ref|NZ_KB822244.1|	0.01	99.99	200	1954517	1954717
Staphylococcus_#_aureus_!_M1466_{_genomic_}_scaffold_acumV-supercont1.13_whole_genome_shotgun_sequence|gi|487401728|ref|NZ_KB822386.1|	0.032	99.968	200	630298	630498
Staphylococcus_#_aureus_!_M1510_{_genomic_}_scaffold_aculM-supercont1.3_whole_genome_shotgun_sequence|gi|487399529|ref|NZ_KB822259.1|	0.086	99.914	200	233551	233751
Staphylococcus_#_aureus_!_M1510_{_genomic_}_scaffold_aculM-supercont1.5_whole_genome_shotgun_sequence|gi|487399617|ref|NZ_KB822261.1|	0.027	99.973	200	745536	745736
Staphylococcus_#_aureus_!_M1520_{_genomic_}_scaffold_acunp-supercont1.1_whole_genome_shotgun_sequence|gi|487137167|ref|NZ_KB822266.1|	0.007	99.993	200	2818614	2818814
Staphylococcus_#_aureus_!_M1533_{_genomic_}_scaffold_aculS-supercont1.2_whole_genome_shotgun_sequence|gi|487138257|ref|NZ_KB822286.1|	0.014	99.986	200	1401966	1402166
Staphylococcus_#_aureus_!_M1563_{_genomic_}_scaffold_acuoe-supercont1.1_whole_genome_shotgun_sequence|gi|487146604|ref|NZ_KB822304.1|	0.028	99.972	200	708016	708216
Staphylococcus_#_aureus_!_M1565_{_genomic_}_scaffold_acunk-supercont1.1_whole_genome_shotgun_sequence|gi|487186501|ref|NZ_KB822299.1|	0.009	99.991	200	2209866	2210066
Staphylococcus_#_aureus_!_subsp._{_aureus_}_55/2053_genomic_scaffold_supercont1.4_whole_genome_shotgun_sequence|gi|257425046|ref|NZ_GG700536.1|	0.114	99.886	200	175179	175379
Staphylococcus_#_aureus_!_subsp._{_aureus_}_C427_genomic_scaffold_supercont1.11_whole_genome_shotgun_sequence|gi|282919625|ref|NZ_GG730151.1|	0.104	99.896	200	191929	192129
Staphylococcus_#_aureus_!_subsp._{_aureus_}_D139_genomic_scaffold_supercont1.13_whole_genome_shotgun_sequence|gi|282916185|ref|NZ_GG730171.1|	0.06	99.94	200	334457	334657
Staphylococcus_#_aureus_!_subsp._{_aureus_}_D139_genomic_scaffold_supercont1.3_whole_genome_shotgun_sequence|gi|282915419|ref|NZ_GG730161.1|	0.09	99.91	200	221630	221830
Staphylococcus_#_aureus_!_subsp._{_aureus_}_EMRSA16_genomic_scaffold_supercont1.15_whole_genome_shotgun_sequence|gi|295428440|ref|NZ_GG770527.1|	0.108	99.892	200	185734	185934
Staphylococcus_#_aureus_!_subsp._{_aureus_}_EMRSA16_genomic_scaffold_supercont1.3_whole_genome_shotgun_sequence|gi|295426606|ref|NZ_GG770515.1|	0.044	99.956	200	454033	454233
Staphylococcus_#_aureus_!_subsp._{_aureus_}_M809_genomic_scaffold_supercont1.10_whole_genome_shotgun_sequence|gi|293509762|ref|NZ_GG749308.1|	0.097	99.903	200	206797	206997
Staphylococcus_#_aureus_!_subsp._{_aureus_}_M876_genomic_scaffold_supercont1.9_whole_genome_shotgun_sequence|gi|257436456|ref|NZ_GG700622.1|	0.047	99.953	200	421698	421898
Staphylococcus_#_aureus_!_subsp._{_aureus_}_MRSA131_genomic_scaffold_Scfld121_whole_genome_shotgun_sequence|gi|422745993|ref|NZ_GL638180.1|	1.027	98.973	200	19275	19475
Staphylococcus_#_aureus_!_subsp._{_aureus_}_MRSA131_genomic_scaffold_Scfld13_whole_genome_shotgun_sequence|gi|422744965|ref|NZ_GL638164.1|	0.561	99.439	200	35477	35677
Staphylococcus_#_aureus_!_subsp._{_aureus_}_MRSA131_genomic_scaffold_Scfld153_whole_genome_shotgun_sequence|gi|422746362|ref|NZ_GL638182.1|	0.098	99.902	200	204728	204928
Staphylococcus_#_aureus_!_subsp._{_aureus_}_MRSA131_genomic_scaffold_Scfld228_whole_genome_shotgun_sequence|gi|422746915|ref|NZ_GL638189.1|	0.116	99.884	200	172504	172704
Staphylococcus_#_aureus_!_subsp._{_aureus_}_MRSA131_genomic_scaffold_Scfld78_whole_genome_shotgun_sequence|gi|422745396|ref|NZ_GL638174.1|	1.914	98.086	200	10250	10450
Staphylococcus_#_aureus_!_subsp._{_aureus_}_MRSA177_genomic_scaffold_Scfld252_whole_genome_shotgun_sequence|gi|422743901|ref|NZ_GL638230.1|	0.139	99.861	200	143551	143751
Staphylococcus_#_aureus_!_subsp._{_aureus_}_MRSA177_genomic_scaffold_Scfld43_whole_genome_shotgun_sequence|gi|422742736|ref|NZ_GL638206.1|	1.914	98.086	200	10250	10450
Staphylococcus_#_aureus_!_subsp._{_aureus_}_MRSA177_genomic_scaffold_Scfld56_whole_genome_shotgun_sequence|gi|422742934|ref|NZ_GL638211.1|	1.05	98.95	200	18849	19049
Staphylococcus_#_aureus_!_subsp._{_aureus_}_MRSA177_genomic_scaffold_Scfld61_whole_genome_shotgun_sequence|gi|422743031|ref|NZ_GL638213.1|	0.369	99.631	200	54068	54268
Staphylococcus_#_aureus_!_subsp._{_aureus_}_MRSA177_genomic_scaffold_Scfld63_whole_genome_shotgun_sequence|gi|422743087|ref|NZ_GL638214.1|	0.561	99.439	200	35477	35677
Staphylococcus_#_aureus_!_subsp._{_aureus_}_MRSA177_genomic_scaffold_Scfld74_whole_genome_shotgun_sequence|gi|422743355|ref|NZ_GL638218.1|	0.8	99.2	200	24809	25009
Staphylococcus_#_aureus_!_subsp._{_aureus_}_TCH130_genomic_scaffold_SCAFFOLD3_whole_genome_shotgun_sequence|gi|255925765|ref|NZ_GG698160.1|	0.048	99.952	200	418008	418208
Staphylococcus_#_aureus_!_subsp._{_aureus_}_TCH130_genomic_scaffold_SCAFFOLD4_whole_genome_shotgun_sequence|gi|255925766|ref|NZ_GG698161.1|	0.098	99.902	200	203008	203208
Staphylococcus_#_aureus_!_subsp._{_aureus_}_TCH130_genomic_scaffold_SCAFFOLD6_whole_genome_shotgun_sequence|gi|255925768|ref|NZ_GG698163.1|	0.181	99.819	200	110367	110567
Staphylococcus_#_aureus_!_subsp._{_aureus_}_WBG10049_genomic_scaffold_supercont1.5_whole_genome_shotgun_sequence|gi|282910944|ref|NZ_GG730212.1|	0.034	99.966	200	588366	588566
Staphylococcus_#_aureus_!_subsp._{_aureus_}_WW2703/97_genomic_scaffold_supercont1.13_whole_genome_shotgun_sequence|gi|282908001|ref|NZ_GG730232.1|	0.042	99.958	200	478191	478391
Staphylococcus_#_aureus_!_subsp._{_aureus_}_WW2703/97_genomic_scaffold_supercont1.26_whole_genome_shotgun_sequence|gi|282908680|ref|NZ_GG730245.1|	0.036	99.964	200	555934	556134
Staphylococcus_#_aureus_!_subsp._{_aureus_}_WW2703/97_genomic_scaffold_supercont1.2_whole_genome_shotgun_sequence|gi|282907462|ref|NZ_GG730221.1|	0.062	99.938	200	323503	323703
Staphylococcus_#_carnosus_!_subsp._{_carnosus_}_TM300_chromosome_complete_genome|gi|224475494|ref|NC_012121.1|	0.008	99.992	200	2566224	2566424
Staphylococcus_#_epidermidis_!_BCM-HMP0060_{_genomic_}_scaffold_SCAFFOLD1_whole_genome_shotgun_sequence|gi|254281370|ref|NZ_GG696727.1|	0.022	99.978	200	907939	908139
Staphylococcus_#_epidermidis_!_M23864:W2(grey)_{_genomic_}_scaffold_SCAFFOLD1_whole_genome_shotgun_sequence|gi|293368503|ref|NZ_GG749255.1|	0.012	99.988	200	1665489	1665689
Staphylococcus_#_lugdunensis_!_ACS-027-V-Sch2_{_genomic_}_scaffold_supercont1.1_whole_genome_shotgun_sequence|gi|448879133|ref|NZ_KB373322.1|	0.011	99.989	200	1764548	1764748
Staphylococcus_#_pseudintermedius_!_ED99_{_chromosome_}_complete_genome|gi|386318029|ref|NC_017568.1|	0.008	99.992	200	2572016	2572216
Staphylococcus_#_pseudintermedius_!_HKU10-03_{_chromosome_}_complete_genome|gi|319891290|ref|NC_014925.1|	0.008	99.992	200	2617181	2617381
Bacillus_#_megaterium_!_WSH-002_{_chromosome_}_complete_genome|gi|384044176|ref|NC_017138.1|	0.002	99.998	101	4983874	4983975
Bacillus_#_sp._!_37MA_{_A3M5DRAFT_scaffold1.1_}_whole_genome_shotgun_sequence|gi|483722481|ref|NZ_KB889752.1|	0.003	99.997	101	3763946	3764047
Staphylococcus_#_aureus_!_subsp._{_aureus_}_D139_genomic_scaffold_supercont1.10_whole_genome_shotgun_sequence|gi|282915839|ref|NZ_GG730168.1|	0.067	99.933	101	150645	150746
Bacillus_#_sp._!_10403023_{_MM10403188_}_genomic_scaffold_scaffold00004_whole_genome_shotgun_sequence|gi|403048279|ref|NZ_HE610988.1|	0.02	99.98	100	496705	496805
Staphylococcus_#_aureus_!_B53639_{_genomic_}_scaffold_acqwD-supercont1.5_whole_genome_shotgun_sequence|gi|486323796|ref|NZ_KB822345.1|	0.011	99.989	100	914482	914582
Staphylococcus_#_aureus_!_M0001_{_genomic_}_scaffold_acrHn-supercont1.12_whole_genome_shotgun_sequence|gi|486217704|ref|NZ_KB820930.1|	0.587	99.413	100	16948	17048
Staphylococcus_#_aureus_!_M0001_{_genomic_}_scaffold_acrHn-supercont1.13_whole_genome_shotgun_sequence|gi|486217781|ref|NZ_KB820931.1|	0.501	99.499	100	19866	19966
Staphylococcus_#_aureus_!_M0001_{_genomic_}_scaffold_acrHn-supercont1.15_whole_genome_shotgun_sequence|gi|486217883|ref|NZ_KB820933.1|	0.366	99.634	100	27251	27351
Staphylococcus_#_aureus_!_M0001_{_genomic_}_scaffold_acrHn-supercont1.2_whole_genome_shotgun_sequence|gi|486220991|ref|NZ_KB820938.1|	0.008	99.992	100	1188027	1188127
Staphylococcus_#_aureus_!_M0006_{_genomic_}_scaffold_aculO-supercont1.1_whole_genome_shotgun_sequence|gi|487242216|ref|NZ_KB820952.1|	0.008	99.992	100	1297827	1297927
Staphylococcus_#_aureus_!_M0006_{_genomic_}_scaffold_aculO-supercont1.8_whole_genome_shotgun_sequence|gi|487267757|ref|NZ_KB820960.1|	0.01	99.99	100	960650	960750
Staphylococcus_#_aureus_!_M0060_{_genomic_}_scaffold_acrGU-supercont1.4_whole_genome_shotgun_sequence|gi|487336408|ref|NZ_KB820987.1|	0.022	99.978	100	453504	453604
Staphylococcus_#_aureus_!_M0066_{_genomic_}_scaffold_acqxs-supercont1.1_whole_genome_shotgun_sequence|gi|486236423|ref|NZ_KB820993.1|	0.009	99.991	100	1114591	1114691
Staphylococcus_#_aureus_!_M0075_{_genomic_}_scaffold_acunI-supercont1.2_whole_genome_shotgun_sequence|gi|487399778|ref|NZ_KB822348.1|	0.494	99.506	100	20161	20261
Staphylococcus_#_aureus_!_M0077_{_genomic_}_scaffold_acunP-supercont1.1_whole_genome_shotgun_sequence|gi|487349956|ref|NZ_KB820999.1|	0.009	99.991	100	1118555	1118655
Staphylococcus_#_aureus_!_M0077_{_genomic_}_scaffold_acunP-supercont1.5_whole_genome_shotgun_sequence|gi|487350224|ref|NZ_KB821003.1|	0.039	99.961	100	258880	258980
Staphylococcus_#_aureus_!_M0102_{_genomic_}_scaffold_acqwC-supercont1.1_whole_genome_shotgun_sequence|gi|486239304|ref|NZ_KB821006.1|	0.028	99.972	100	351311	351411
Staphylococcus_#_aureus_!_M0102_{_genomic_}_scaffold_acqwC-supercont1.6_whole_genome_shotgun_sequence|gi|486241470|ref|NZ_KB821011.1|	0.012	99.988	100	831310	831410
Staphylococcus_#_aureus_!_M0103_{_genomic_}_scaffold_acqxd-supercont1.1_whole_genome_shotgun_sequence|gi|486242902|ref|NZ_KB821012.1|	0.009	99.991	100	1118063	1118163
Staphylococcus_#_aureus_!_M0103_{_genomic_}_scaffold_acqxd-supercont1.4_whole_genome_shotgun_sequence|gi|486246367|ref|NZ_KB821017.1|	0.008	99.992	100	1222262	1222362
Staphylococcus_#_aureus_!_M0104_{_genomic_}_scaffold_acrHp-supercont1.1_whole_genome_shotgun_sequence|gi|487372340|ref|NZ_KB821023.1|	0.008	99.992	100	1295801	1295901
Staphylococcus_#_aureus_!_M0104_{_genomic_}_scaffold_acrHp-supercont1.7_whole_genome_shotgun_sequence|gi|487372667|ref|NZ_KB821030.1|	0.016	99.984	100	612799	612899
Staphylococcus_#_aureus_!_M0108_{_genomic_}_scaffold_acunZ-supercont1.3_whole_genome_shotgun_sequence|gi|487358582|ref|NZ_KB821035.1|	0.038	99.962	100	261588	261688
Staphylococcus_#_aureus_!_M0144_{_genomic_}_scaffold_acunq-supercont1.1_whole_genome_shotgun_sequence|gi|487359044|ref|NZ_KB821038.1|	0.007	99.993	100	1348934	1349034
Staphylococcus_#_aureus_!_M0144_{_genomic_}_scaffold_acunq-supercont1.2_whole_genome_shotgun_sequence|gi|487359132|ref|NZ_KB821039.1|	0.016	99.984	100	621337	621437
Staphylococcus_#_aureus_!_M0144_{_genomic_}_scaffold_acunq-supercont1.3_whole_genome_shotgun_sequence|gi|487359205|ref|NZ_KB821040.1|	0.011	99.989	100	926892	926992
Staphylococcus_#_aureus_!_M0154_{_genomic_}_scaffold_acumB-supercont1.8_whole_genome_shotgun_sequence|gi|487359822|ref|NZ_KB821052.1|	0.007	99.993	100	1437867	1437967
Staphylococcus_#_aureus_!_M0171_{_genomic_}_scaffold_acqwu-supercont1.5_whole_genome_shotgun_sequence|gi|487372978|ref|NZ_KB821065.1|	0.007	99.993	100	1520796	1520896
Staphylococcus_#_aureus_!_M0173_{_genomic_}_scaffold_acrHj-supercont1.1_whole_genome_shotgun_sequence|gi|486253298|ref|NZ_KB821070.1|	0.006	99.994	100	1786317	1786417
Staphylococcus_#_aureus_!_M0177_{_genomic_}_scaffold_acumi-supercont1.5_whole_genome_shotgun_sequence|gi|487360174|ref|NZ_KB821082.1|	0.009	99.991	100	1069676	1069776
Staphylococcus_#_aureus_!_M0197_{_genomic_}_scaffold_acrGV-supercont1.1_whole_genome_shotgun_sequence|gi|486256732|ref|NZ_KB821084.1|	0.005	99.995	100	1932676	1932776
Staphylococcus_#_aureus_!_M0197_{_genomic_}_scaffold_acrGV-supercont1.3_whole_genome_shotgun_sequence|gi|486257669|ref|NZ_KB821086.1|	0.019	99.981	100	516689	516789
Staphylococcus_#_aureus_!_M0200_{_genomic_}_scaffold_acumC-supercont1.11_whole_genome_shotgun_sequence|gi|487360329|ref|NZ_KB821094.1|	0.277	99.723	100	36004	36104
Staphylococcus_#_aureus_!_M0200_{_genomic_}_scaffold_acumC-supercont1.12_whole_genome_shotgun_sequence|gi|487360390|ref|NZ_KB821095.1|	0.009	99.991	100	1077123	1077223
Staphylococcus_#_aureus_!_M0210_{_genomic_}_scaffold_acqwt-supercont1.1_whole_genome_shotgun_sequence|gi|487373279|ref|NZ_KB821105.1|	0.004	99.996	100	2284788	2284888
Staphylococcus_#_aureus_!_M0210_{_genomic_}_scaffold_acqwt-supercont1.3_whole_genome_shotgun_sequence|gi|487373377|ref|NZ_KB821107.1|	0.018	99.982	100	557653	557753
Staphylococcus_#_aureus_!_M0210_{_genomic_}_scaffold_acqwt-supercont1.4_whole_genome_shotgun_sequence|gi|487373398|ref|NZ_KB821108.1|	5.074	94.926	100	1871	1971
Staphylococcus_#_aureus_!_M0212_{_genomic_}_scaffold_acuna-supercont1.3_whole_genome_shotgun_sequence|gi|487360877|ref|NZ_KB821112.1|	0.008	99.992	100	1257601	1257701
Staphylococcus_#_aureus_!_M0212_{_genomic_}_scaffold_acuna-supercont1.4_whole_genome_shotgun_sequence|gi|487361012|ref|NZ_KB821113.1|	0.009	99.991	100	1111999	1112099
Staphylococcus_#_aureus_!_M0213_{_genomic_}_scaffold_acqwL-supercont1.1_whole_genome_shotgun_sequence|gi|487373688|ref|NZ_KB821115.1|	0.007	99.993	100	1404252	1404352
Staphylococcus_#_aureus_!_M0221_{_genomic_}_scaffold_acqxa-supercont1.1_whole_genome_shotgun_sequence|gi|486258704|ref|NZ_KB821123.1|	0.595	99.405	100	16713	16813
Staphylococcus_#_aureus_!_M0237_{_genomic_}_scaffold_acrHd-supercont1.2_whole_genome_shotgun_sequence|gi|486261107|ref|NZ_KB821134.1|	0.019	99.981	100	537638	537738
Staphylococcus_#_aureus_!_M0237_{_genomic_}_scaffold_acrHd-supercont1.3_whole_genome_shotgun_sequence|gi|486261301|ref|NZ_KB821135.1|	0.015	99.985	100	654986	655086
Staphylococcus_#_aureus_!_M0237_{_genomic_}_scaffold_acrHd-supercont1.6_whole_genome_shotgun_sequence|gi|486262447|ref|NZ_KB821138.1|	0.016	99.984	100	624436	624536
Staphylococcus_#_aureus_!_M0240_{_genomic_}_scaffold_acqwO-supercont1.11_whole_genome_shotgun_sequence|gi|487374136|ref|NZ_KB821145.1|	0.014	99.986	100	697619	697719
Staphylococcus_#_aureus_!_M0240_{_genomic_}_scaffold_acqwO-supercont1.5_whole_genome_shotgun_sequence|gi|487374265|ref|NZ_KB821149.1|	0.023	99.977	100	426498	426598
Staphylococcus_#_aureus_!_M0240_{_genomic_}_scaffold_acqwO-supercont1.6_whole_genome_shotgun_sequence|gi|487374423|ref|NZ_KB821150.1|	0.016	99.984	100	616256	616356
Staphylococcus_#_aureus_!_M0240_{_genomic_}_scaffold_acqwO-supercont1.7_whole_genome_shotgun_sequence|gi|487374535|ref|NZ_KB821151.1|	0.017	99.983	100	590600	590700
Staphylococcus_#_aureus_!_M0240_{_genomic_}_scaffold_acqwO-supercont1.8_whole_genome_shotgun_sequence|gi|487374573|ref|NZ_KB821152.1|	0.059	99.941	100	170624	170724
Staphylococcus_#_aureus_!_M0252_{_genomic_}_scaffold_acqxE-supercont1.1_whole_genome_shotgun_sequence|gi|486266332|ref|NZ_KB821139.1|	0.004	99.996	100	2772588	2772688
Staphylococcus_#_aureus_!_M0270_{_genomic_}_scaffold_acrGX-supercont1.1_whole_genome_shotgun_sequence|gi|487374734|ref|NZ_KB821154.1|	0.009	99.991	100	1114190	1114290
Staphylococcus_#_aureus_!_M0270_{_genomic_}_scaffold_acrGX-supercont1.5_whole_genome_shotgun_sequence|gi|487374986|ref|NZ_KB821162.1|	0.03	99.97	100	335643	335743
Staphylococcus_#_aureus_!_M0270_{_genomic_}_scaffold_acrGX-supercont1.9_whole_genome_shotgun_sequence|gi|487375102|ref|NZ_KB821166.1|	0.16	99.84	100	62294	62394
Staphylococcus_#_aureus_!_M0279_{_genomic_}_scaffold_acqxn-supercont1.3_whole_genome_shotgun_sequence|gi|487376092|ref|NZ_KB821176.1|	0.009	99.991	100	1114374	1114474
Staphylococcus_#_aureus_!_M0280_{_genomic_}_scaffold_acunT-supercont1.4_whole_genome_shotgun_sequence|gi|487362493|ref|NZ_KB821184.1|	0.844	99.156	100	11744	11844
Staphylococcus_#_aureus_!_M0280_{_genomic_}_scaffold_acunT-supercont1.5_whole_genome_shotgun_sequence|gi|487362514|ref|NZ_KB821185.1|	0.039	99.961	100	254618	254718
Staphylococcus_#_aureus_!_M0280_{_genomic_}_scaffold_acunT-supercont1.8_whole_genome_shotgun_sequence|gi|487362733|ref|NZ_KB821188.1|	0.006	99.994	100	1712026	1712126
Staphylococcus_#_aureus_!_M0294_{_genomic_}_scaffold_acumG-supercont1.1_whole_genome_shotgun_sequence|gi|487400027|ref|NZ_KB822352.1|	0.007	99.993	100	1377094	1377194
Staphylococcus_#_aureus_!_M0294_{_genomic_}_scaffold_acumG-supercont1.8_whole_genome_shotgun_sequence|gi|487400169|ref|NZ_KB822360.1|	0.034	99.966	100	298210	298310
Staphylococcus_#_aureus_!_M0326_{_genomic_}_scaffold_acrHf-supercont1.4_whole_genome_shotgun_sequence|gi|486268858|ref|NZ_KB821205.1|	0.108	99.892	100	92906	93006
Staphylococcus_#_aureus_!_M0328_{_genomic_}_scaffold_acrGR-supercont1.3_whole_genome_shotgun_sequence|gi|486272254|ref|NZ_KB821213.1|	0.015	99.985	100	646120	646220
Staphylococcus_#_aureus_!_M0328_{_genomic_}_scaffold_acrGR-supercont1.4_whole_genome_shotgun_sequence|gi|486272995|ref|NZ_KB821214.1|	0.006	99.994	100	1652896	1652996
Staphylococcus_#_aureus_!_M0329_{_genomic_}_scaffold_acrHa-supercont1.9_whole_genome_shotgun_sequence|gi|486276662|ref|NZ_KB821233.1|	0.014	99.986	100	739117	739217
Staphylococcus_#_aureus_!_M0330_{_genomic_}_scaffold_acqxt-supercont1.2_whole_genome_shotgun_sequence|gi|486278717|ref|NZ_KB821221.1|	0.004	99.996	100	2650325	2650425
Staphylococcus_#_aureus_!_M0334_{_genomic_}_scaffold_acumz-supercont1.1_whole_genome_shotgun_sequence|gi|487363432|ref|NZ_KB821234.1|	0.007	99.993	100	1383157	1383257
Staphylococcus_#_aureus_!_M0334_{_genomic_}_scaffold_acumz-supercont1.4_whole_genome_shotgun_sequence|gi|487363716|ref|NZ_KB821237.1|	0.007	99.993	100	1528676	1528776
Staphylococcus_#_aureus_!_M0340_{_genomic_}_scaffold_acqxN-supercont1.1_whole_genome_shotgun_sequence|gi|486279730|ref|NZ_KB821241.1|	0.593	99.407	100	16769	16869
Staphylococcus_#_aureus_!_M0351_{_genomic_}_scaffold_acunV-supercont1.7_whole_genome_shotgun_sequence|gi|487364468|ref|NZ_KB821261.1|	0.007	99.993	100	1436731	1436831
Staphylococcus_#_aureus_!_M0374_{_genomic_}_scaffold_aculK-supercont1.1_whole_genome_shotgun_sequence|gi|487365394|ref|NZ_KB821278.1|	0.01	99.99	100	1045350	1045450
Staphylococcus_#_aureus_!_M0374_{_genomic_}_scaffold_aculK-supercont1.2_whole_genome_shotgun_sequence|gi|487365422|ref|NZ_KB821279.1|	0.045	99.955	100	220059	220159
Staphylococcus_#_aureus_!_M0375_{_genomic_}_scaffold_acunY-supercont1.12_whole_genome_shotgun_sequence|gi|487365826|ref|NZ_KB821285.1|	0.233	99.767	100	42899	42999
Staphylococcus_#_aureus_!_M0375_{_genomic_}_scaffold_acunY-supercont1.1_whole_genome_shotgun_sequence|gi|487365727|ref|NZ_KB821282.1|	0.009	99.991	100	1123698	1123798
Staphylococcus_#_aureus_!_M0375_{_genomic_}_scaffold_acunY-supercont1.6_whole_genome_shotgun_sequence|gi|487366006|ref|NZ_KB821292.1|	0.016	99.984	100	624945	625045
Staphylococcus_#_aureus_!_M0375_{_genomic_}_scaffold_acunY-supercont1.9_whole_genome_shotgun_sequence|gi|487366826|ref|NZ_KB821295.1|	0.168	99.832	100	59397	59497
Staphylococcus_#_aureus_!_M0391_{_genomic_}_scaffold_acqwG-supercont1.1_whole_genome_shotgun_sequence|gi|486290024|ref|NZ_KB821309.1|	0.009	99.991	100	1121222	1121322
Staphylococcus_#_aureus_!_M0391_{_genomic_}_scaffold_acqwG-supercont1.5_whole_genome_shotgun_sequence|gi|486290789|ref|NZ_KB821313.1|	4.902	95.098	100	1940	2040
Staphylococcus_#_aureus_!_M0391_{_genomic_}_scaffold_acqwG-supercont1.6_whole_genome_shotgun_sequence|gi|486291032|ref|NZ_KB821314.1|	0.032	99.968	100	313040	313140
Staphylococcus_#_aureus_!_M0404_{_genomic_}_scaffold_acrGQ-supercont1.2_whole_genome_shotgun_sequence|gi|487378643|ref|NZ_KB821303.1|	0.061	99.939	100	163332	163432
Staphylococcus_#_aureus_!_M0404_{_genomic_}_scaffold_acrGQ-supercont1.4_whole_genome_shotgun_sequence|gi|487378778|ref|NZ_KB821305.1|	0.01	99.99	100	1046303	1046403
Staphylococcus_#_aureus_!_M0408_{_genomic_}_scaffold_acrHk-supercont1.2_whole_genome_shotgun_sequence|gi|486294733|ref|NZ_KB821327.1|	0.034	99.966	100	292327	292427
Staphylococcus_#_aureus_!_M0408_{_genomic_}_scaffold_acrHk-supercont1.3_whole_genome_shotgun_sequence|gi|486295120|ref|NZ_KB821328.1|	0.058	99.942	100	172696	172796
Staphylococcus_#_aureus_!_M0415_{_genomic_}_scaffold_acrGP-supercont1.1_whole_genome_shotgun_sequence|gi|487379100|ref|NZ_KB821317.1|	0.008	99.992	100	1228014	1228114
Staphylococcus_#_aureus_!_M0415_{_genomic_}_scaffold_acrGP-supercont1.4_whole_genome_shotgun_sequence|gi|487379243|ref|NZ_KB821320.1|	0.021	99.979	100	473614	473714
Staphylococcus_#_aureus_!_M0438_{_genomic_}_scaffold_acuml-supercont1.4_whole_genome_shotgun_sequence|gi|487368753|ref|NZ_KB821353.1|	0.009	99.991	100	1104767	1104867
Staphylococcus_#_aureus_!_M0460_{_genomic_}_scaffold_acqxK-supercont1.3_whole_genome_shotgun_sequence|gi|487379888|ref|NZ_KB821365.1|	0.481	99.519	100	20689	20789
Staphylococcus_#_aureus_!_M0467_{_genomic_}_scaffold_acqwA-supercont1.5_whole_genome_shotgun_sequence|gi|486307196|ref|NZ_KB821374.1|	0.007	99.993	100	1466480	1466580
Staphylococcus_#_aureus_!_M0468_{_genomic_}_scaffold_acqxk-supercont1.1_whole_genome_shotgun_sequence|gi|486308227|ref|NZ_KB821358.1|	0.593	99.407	100	16769	16869
Staphylococcus_#_aureus_!_M0478_{_genomic_}_scaffold_acrGZ-supercont1.5_whole_genome_shotgun_sequence|gi|486313128|ref|NZ_KB821380.1|	0.011	99.989	100	907918	908018
Staphylococcus_#_aureus_!_M0489_{_genomic_}_scaffold_acsPG-supercont1.4_whole_genome_shotgun_sequence|gi|486316648|ref|NZ_KB821395.1|	0.047	99.953	100	211850	211950
Staphylococcus_#_aureus_!_M0493_{_genomic_}_scaffold_acqwN-supercont1.2_whole_genome_shotgun_sequence|gi|487380256|ref|NZ_KB821402.1|	0.007	99.993	100	1401411	1401511
Staphylococcus_#_aureus_!_M0493_{_genomic_}_scaffold_acqwN-supercont1.3_whole_genome_shotgun_sequence|gi|487380377|ref|NZ_KB821403.1|	0.007	99.993	100	1443321	1443421
Staphylococcus_#_aureus_!_M0510_{_genomic_}_scaffold_acumF-supercont1.4_whole_genome_shotgun_sequence|gi|487369183|ref|NZ_KB821410.1|	0.006	99.994	100	1589359	1589459
Staphylococcus_#_aureus_!_M0528_{_genomic_}_scaffold_acvqo-supercont1.11_whole_genome_shotgun_sequence|gi|486335757|ref|NZ_KB821416.1|	0.009	99.991	100	1139881	1139981
Staphylococcus_#_aureus_!_M0528_{_genomic_}_scaffold_acvqo-supercont1.2_whole_genome_shotgun_sequence|gi|486337440|ref|NZ_KB821423.1|	0.058	99.942	100	172081	172181
Staphylococcus_#_aureus_!_M0529_{_genomic_}_scaffold_acumA-supercont1.1_whole_genome_shotgun_sequence|gi|486413843|ref|NZ_KB821431.1|	0.005	99.995	100	1914418	1914518
Staphylococcus_#_aureus_!_M0529_{_genomic_}_scaffold_acumA-supercont1.3_whole_genome_shotgun_sequence|gi|486414273|ref|NZ_KB821433.1|	0.021	99.979	100	465161	465261
Staphylococcus_#_aureus_!_M0539_{_genomic_}_scaffold_acvqn-supercont1.11_whole_genome_shotgun_sequence|gi|486347448|ref|NZ_KB821452.1|	0.016	99.984	100	623660	623760
Staphylococcus_#_aureus_!_M0539_{_genomic_}_scaffold_acvqn-supercont1.1_whole_genome_shotgun_sequence|gi|486346615|ref|NZ_KB821450.1|	0.009	99.991	100	1088844	1088944
Staphylococcus_#_aureus_!_M0547_{_genomic_}_scaffold_acvqJ-supercont1.1_whole_genome_shotgun_sequence|gi|486350836|ref|NZ_KB821442.1|	0.008	99.992	100	1303309	1303409
Staphylococcus_#_aureus_!_M0547_{_genomic_}_scaffold_acvqJ-supercont1.5_whole_genome_shotgun_sequence|gi|486352271|ref|NZ_KB821446.1|	0.016	99.984	100	628665	628765
Staphylococcus_#_aureus_!_M0562_{_genomic_}_scaffold_acumS-supercont1.1_whole_genome_shotgun_sequence|gi|487370065|ref|NZ_KB821470.1|	0.011	99.989	100	890715	890815
Staphylococcus_#_aureus_!_M0562_{_genomic_}_scaffold_acumS-supercont1.2_whole_genome_shotgun_sequence|gi|487370195|ref|NZ_KB821471.1|	0.01	99.99	100	1037640	1037740
Staphylococcus_#_aureus_!_M0565_{_genomic_}_scaffold_acvqE-supercont1.4_whole_genome_shotgun_sequence|gi|486354622|ref|NZ_KB821482.1|	0.039	99.961	100	258483	258583
Staphylococcus_#_aureus_!_M0571_{_genomic_}_scaffold_acumO-supercont1.2_whole_genome_shotgun_sequence|gi|487370688|ref|NZ_KB821477.1|	0.003	99.997	100	2899655	2899755
Staphylococcus_#_aureus_!_M0580_{_genomic_}_scaffold_acvrg-supercont1.1_whole_genome_shotgun_sequence|gi|486356325|ref|NZ_KB821486.1|	0.007	99.993	100	1367335	1367435
Staphylococcus_#_aureus_!_M0584_{_genomic_}_scaffold_acunu-supercont1.2_whole_genome_shotgun_sequence|gi|487370984|ref|NZ_KB821490.1|	0.008	99.992	100	1213715	1213815
Staphylococcus_#_aureus_!_M0602_{_genomic_}_scaffold_acvqp-supercont1.3_whole_genome_shotgun_sequence|gi|486358833|ref|NZ_KB821495.1|	0.056	99.944	100	180003	180103
Staphylococcus_#_aureus_!_M0602_{_genomic_}_scaffold_acvqp-supercont1.4_whole_genome_shotgun_sequence|gi|486359560|ref|NZ_KB821496.1|	0.019	99.981	100	516701	516801
Staphylococcus_#_aureus_!_M0602_{_genomic_}_scaffold_acvqp-supercont1.5_whole_genome_shotgun_sequence|gi|486359730|ref|NZ_KB821497.1|	0.044	99.956	100	227613	227713
Staphylococcus_#_aureus_!_M0602_{_genomic_}_scaffold_acvqp-supercont1.7_whole_genome_shotgun_sequence|gi|486360548|ref|NZ_KB821499.1|	0.008	99.992	100	1227268	1227368
Staphylococcus_#_aureus_!_M0622_{_genomic_}_scaffold_acvqA-supercont1.2_whole_genome_shotgun_sequence|gi|486361222|ref|NZ_KB821503.1|	0.028	99.972	100	358813	358913
Staphylococcus_#_aureus_!_M0622_{_genomic_}_scaffold_acvqA-supercont1.3_whole_genome_shotgun_sequence|gi|486362492|ref|NZ_KB821504.1|	0.005	99.995	100	1989936	1990036
Staphylococcus_#_aureus_!_M0628_{_genomic_}_scaffold_acuno-supercont-complete_whole_genome_shotgun_sequence|gi|486412957|ref|NZ_KB821506.1|	0.004	99.996	100	2828336	2828436
Staphylococcus_#_aureus_!_M0646_{_genomic_}_scaffold_acuoa-supercont1.6_whole_genome_shotgun_sequence|gi|487380761|ref|NZ_KB821517.1|	0.008	99.992	100	1259454	1259554
Staphylococcus_#_aureus_!_M0648_{_genomic_}_scaffold_acunl-supercont1.1_whole_genome_shotgun_sequence|gi|487380947|ref|NZ_KB821519.1|	0.01	99.99	100	1004402	1004502
Staphylococcus_#_aureus_!_M0648_{_genomic_}_scaffold_acunl-supercont1.6_whole_genome_shotgun_sequence|gi|487381205|ref|NZ_KB821527.1|	0.016	99.984	100	628391	628491
Staphylococcus_#_aureus_!_M0660_{_genomic_}_scaffold_acumg-supercont1.10_whole_genome_shotgun_sequence|gi|487381382|ref|NZ_KB821532.1|	0.016	99.984	100	624285	624385
Staphylococcus_#_aureus_!_M0660_{_genomic_}_scaffold_acumg-supercont1.1_whole_genome_shotgun_sequence|gi|487381360|ref|NZ_KB821531.1|	0.012	99.988	100	859803	859903
Staphylococcus_#_aureus_!_M0663_{_genomic_}_scaffold_acuoc-supercont1.5_whole_genome_shotgun_sequence|gi|487382076|ref|NZ_KB821556.1|	0.041	99.959	100	246399	246499
Staphylococcus_#_aureus_!_M0663_{_genomic_}_scaffold_acuoc-supercont1.6_whole_genome_shotgun_sequence|gi|487382141|ref|NZ_KB821557.1|	0.016	99.984	100	624674	624774
Staphylococcus_#_aureus_!_M0673_{_genomic_}_scaffold_acumv-supercont1.3_whole_genome_shotgun_sequence|gi|487382473|ref|NZ_KB821564.1|	0.012	99.988	100	819560	819660
Staphylococcus_#_aureus_!_M0673_{_genomic_}_scaffold_acumv-supercont1.5_whole_genome_shotgun_sequence|gi|487382564|ref|NZ_KB821566.1|	0.043	99.957	100	230738	230838
Staphylococcus_#_aureus_!_M0687_{_genomic_}_scaffold_acvqC-supercont1.2_whole_genome_shotgun_sequence|gi|486365630|ref|NZ_KB821578.1|	0.06	99.94	100	166793	166893
Staphylococcus_#_aureus_!_M0692_{_genomic_}_scaffold_acvqM-supercont1.8_whole_genome_shotgun_sequence|gi|486369751|ref|NZ_KB821594.1|	0.01	99.99	100	1028084	1028184
Staphylococcus_#_aureus_!_M0695_{_genomic_}_scaffold_acunx-supercont1.7_whole_genome_shotgun_sequence|gi|489045046|ref|NZ_KB821612.1|	0.489	99.511	100	20346	20446
Staphylococcus_#_aureus_!_M0719_{_genomic_}_scaffold_acvrc-supercont1.1_whole_genome_shotgun_sequence|gi|480443880|ref|NZ_KB821615.1|	0.01	99.99	100	976129	976229
Staphylococcus_#_aureus_!_M0769_{_genomic_}_scaffold_acvqF-supercont1.1_whole_genome_shotgun_sequence|gi|480446662|ref|NZ_KB821625.1|	0.02	99.98	100	492997	493097
Staphylococcus_#_aureus_!_M0769_{_genomic_}_scaffold_acvqF-supercont1.3_whole_genome_shotgun_sequence|gi|480447467|ref|NZ_KB821631.1|	0.012	99.988	100	805305	805405
Staphylococcus_#_aureus_!_M0769_{_genomic_}_scaffold_acvqF-supercont1.6_whole_genome_shotgun_sequence|gi|480448214|ref|NZ_KB821634.1|	0.039	99.961	100	256084	256184
Staphylococcus_#_aureus_!_M0780_{_genomic_}_scaffold_acvqm-supercont1.3_whole_genome_shotgun_sequence|gi|486376198|ref|NZ_KB821664.1|	0.012	99.988	100	803683	803783
Staphylococcus_#_aureus_!_M0780_{_genomic_}_scaffold_acvqm-supercont1.4_whole_genome_shotgun_sequence|gi|486376336|ref|NZ_KB821665.1|	0.039	99.961	100	257724	257824
Staphylococcus_#_aureus_!_M0792_{_genomic_}_scaffold_acuni-supercont1.8_whole_genome_shotgun_sequence|gi|487383273|ref|NZ_KB821678.1|	0.006	99.994	100	1790493	1790593
Staphylococcus_#_aureus_!_M0799_{_genomic_}_scaffold_acvqq-supercont1.1_whole_genome_shotgun_sequence|gi|486378646|ref|NZ_KB821650.1|	0.009	99.991	100	1081402	1081502
Staphylococcus_#_aureus_!_M0799_{_genomic_}_scaffold_acvqq-supercont1.7_whole_genome_shotgun_sequence|gi|486380307|ref|NZ_KB821659.1|	0.015	99.985	100	675876	675976
Staphylococcus_#_aureus_!_M0799_{_genomic_}_scaffold_acvqq-supercont1.8_whole_genome_shotgun_sequence|gi|486380496|ref|NZ_KB821660.1|	0.034	99.966	100	290716	290816
Staphylococcus_#_aureus_!_M0822_{_genomic_}_scaffold_acunB-supercont1.4_whole_genome_shotgun_sequence|gi|487383672|ref|NZ_KB821683.1|	0.043	99.957	100	233632	233732
Staphylococcus_#_aureus_!_M0822_{_genomic_}_scaffold_acunB-supercont1.6_whole_genome_shotgun_sequence|gi|487383719|ref|NZ_KB821685.1|	0.471	99.529	100	21116	21216
Staphylococcus_#_aureus_!_M0823_{_genomic_}_scaffold_acvqk-supercont1.6_whole_genome_shotgun_sequence|gi|486383324|ref|NZ_KB821696.1|	0.011	99.989	100	930196	930296
Staphylococcus_#_aureus_!_M0844_{_genomic_}_scaffold_acvqL-supercont1.2_whole_genome_shotgun_sequence|gi|486385588|ref|NZ_KB821711.1|	0.004	99.996	100	2451359	2451459
Staphylococcus_#_aureus_!_M0871_{_genomic_}_scaffold_acumy-supercont1.3_whole_genome_shotgun_sequence|gi|487384546|ref|NZ_KB821703.1|	0.017	99.983	100	597081	597181
Staphylococcus_#_aureus_!_M0892_{_genomic_}_scaffold_aculW-supercont1.3_whole_genome_shotgun_sequence|gi|487385673|ref|NZ_KB821732.1|	0.008	99.992	100	1226462	1226562
Staphylococcus_#_aureus_!_M0892_{_genomic_}_scaffold_aculW-supercont1.4_whole_genome_shotgun_sequence|gi|487385723|ref|NZ_KB821733.1|	0.025	99.975	100	405282	405382
Staphylococcus_#_aureus_!_M0900_{_genomic_}_scaffold_acunz-supercont1.5_whole_genome_shotgun_sequence|gi|487386253|ref|NZ_KB821743.1|	0.017	99.983	100	597881	597981
Staphylococcus_#_aureus_!_M0900_{_genomic_}_scaffold_acunz-supercont1.6_whole_genome_shotgun_sequence|gi|487386371|ref|NZ_KB821744.1|	0.014	99.986	100	697557	697657
Staphylococcus_#_aureus_!_M0927_{_genomic_}_scaffold_aculU-supercont1.5_whole_genome_shotgun_sequence|gi|487387476|ref|NZ_KB821755.1|	0.043	99.957	100	232916	233016
Staphylococcus_#_aureus_!_M0927_{_genomic_}_scaffold_aculU-supercont1.8_whole_genome_shotgun_sequence|gi|487387567|ref|NZ_KB821758.1|	0.459	99.541	100	21707	21807
Staphylococcus_#_aureus_!_M0943_{_genomic_}_scaffold_acvqw-supercont1.3_whole_genome_shotgun_sequence|gi|486391432|ref|NZ_KB821767.1|	0.01	99.99	100	1041451	1041551
Staphylococcus_#_aureus_!_M0943_{_genomic_}_scaffold_acvqw-supercont1.4_whole_genome_shotgun_sequence|gi|486391659|ref|NZ_KB821768.1|	0.047	99.953	100	214136	214236
Staphylococcus_#_aureus_!_M0944_{_genomic_}_scaffold_acvqy-supercont1.1_whole_genome_shotgun_sequence|gi|486393915|ref|NZ_KB821779.1|	0.006	99.994	100	1631629	1631729
Staphylococcus_#_aureus_!_M0946_{_genomic_}_scaffold_acunJ-supercont1.5_whole_genome_shotgun_sequence|gi|487388055|ref|NZ_KB821790.1|	0.041	99.959	100	244112	244212
Staphylococcus_#_aureus_!_M0978_{_genomic_}_scaffold_acunG-supercont1.6_whole_genome_shotgun_sequence|gi|487390132|ref|NZ_KB821776.1|	0.041	99.959	100	241586	241686
Staphylococcus_#_aureus_!_M0994_{_genomic_}_scaffold_acunc-supercont1.3_whole_genome_shotgun_sequence|gi|487390907|ref|NZ_KB821811.1|	0.006	99.994	100	1689988	1690088
Staphylococcus_#_aureus_!_M0998_{_genomic_}_scaffold_acvqv-supercont1.1_whole_genome_shotgun_sequence|gi|486398090|ref|NZ_KB821813.1|	0.007	99.993	100	1455127	1455227
Staphylococcus_#_aureus_!_M0999_{_genomic_}_scaffold_acvqG-supercont1.3_whole_genome_shotgun_sequence|gi|486399931|ref|NZ_KB821822.1|	0.011	99.989	100	915166	915266
Staphylococcus_#_aureus_!_M1010_{_genomic_}_scaffold_acvqt-supercont1.1_whole_genome_shotgun_sequence|gi|486402553|ref|NZ_KB821824.1|	0.007	99.993	100	1444312	1444412
Staphylococcus_#_aureus_!_M1015_{_genomic_}_scaffold_acvqH-supercont1.7_whole_genome_shotgun_sequence|gi|486405285|ref|NZ_KB821840.1|	0.016	99.984	100	618449	618549
Staphylococcus_#_aureus_!_M1016_{_genomic_}_scaffold_acvqx-supercont1.2_whole_genome_shotgun_sequence|gi|486405783|ref|NZ_KB821843.1|	0.038	99.962	100	266009	266109
Staphylococcus_#_aureus_!_M1016_{_genomic_}_scaffold_acvqx-supercont1.4_whole_genome_shotgun_sequence|gi|486406319|ref|NZ_KB821845.1|	0.043	99.957	100	230942	231042
Staphylococcus_#_aureus_!_M1034_{_genomic_}_scaffold_acumn-supercont1.6_whole_genome_shotgun_sequence|gi|487391557|ref|NZ_KB821857.1|	0.029	99.971	100	343633	343733
Staphylococcus_#_aureus_!_M1036_{_genomic_}_scaffold_acvqI-supercont1.6_whole_genome_shotgun_sequence|gi|486408574|ref|NZ_KB821867.1|	0.091	99.909	100	109852	109952
Staphylococcus_#_aureus_!_M1036_{_genomic_}_scaffold_acvqI-supercont1.9_whole_genome_shotgun_sequence|gi|486409401|ref|NZ_KB821870.1|	0.01	99.99	100	1011081	1011181
Staphylococcus_#_aureus_!_M1037_{_genomic_}_scaffold_acvqz-supercont1.4_whole_genome_shotgun_sequence|gi|486410818|ref|NZ_KB821923.1|	0.039	99.961	100	258887	258987
Staphylococcus_#_aureus_!_M1037_{_genomic_}_scaffold_acvqz-supercont1.6_whole_genome_shotgun_sequence|gi|486411563|ref|NZ_KB821925.1|	0.011	99.989	100	917895	917995
Staphylococcus_#_aureus_!_M1044_{_genomic_}_scaffold_acumE-supercont1.11_whole_genome_shotgun_sequence|gi|487392161|ref|NZ_KB821873.1|	0.016	99.984	100	628539	628639
Staphylococcus_#_aureus_!_M1044_{_genomic_}_scaffold_acumE-supercont1.5_whole_genome_shotgun_sequence|gi|487392674|ref|NZ_KB821885.1|	0.041	99.959	100	241458	241558
Staphylococcus_#_aureus_!_M1060_{_genomic_}_scaffold_acunt-supercont1.1_whole_genome_shotgun_sequence|gi|487400592|ref|NZ_KB822368.1|	0.004	99.996	100	2355958	2356058
Staphylococcus_#_aureus_!_M1061_{_genomic_}_scaffold_aculN-supercont1.1_whole_genome_shotgun_sequence|gi|487393271|ref|NZ_KB821890.1|	0.009	99.991	100	1117015	1117115
Staphylococcus_#_aureus_!_M1061_{_genomic_}_scaffold_aculN-supercont1.4_whole_genome_shotgun_sequence|gi|487393526|ref|NZ_KB821895.1|	0.54	99.46	100	18419	18519
Staphylococcus_#_aureus_!_M1061_{_genomic_}_scaffold_aculN-supercont1.5_whole_genome_shotgun_sequence|gi|487393551|ref|NZ_KB821896.1|	0.21	99.79	100	47439	47539
Staphylococcus_#_aureus_!_M1061_{_genomic_}_scaffold_aculN-supercont1.9_whole_genome_shotgun_sequence|gi|487393922|ref|NZ_KB821900.1|	0.019	99.981	100	528009	528109
Staphylococcus_#_aureus_!_M1062_{_genomic_}_scaffold_aculY-supercont1.4_whole_genome_shotgun_sequence|gi|487394164|ref|NZ_KB821915.1|	0.043	99.957	100	232716	232816
Staphylococcus_#_aureus_!_M1063_{_genomic_}_scaffold_acumZ-supercont1.10_whole_genome_shotgun_sequence|gi|486415432|ref|NZ_KB821902.1|	0.097	99.903	100	103441	103541
Staphylococcus_#_aureus_!_M1063_{_genomic_}_scaffold_acumZ-supercont1.11_whole_genome_shotgun_sequence|gi|486415479|ref|NZ_KB821903.1|	1.55	98.45	100	6350	6450
Staphylococcus_#_aureus_!_M1063_{_genomic_}_scaffold_acumZ-supercont1.4_whole_genome_shotgun_sequence|gi|486416208|ref|NZ_KB821906.1|	0.006	99.994	100	1645962	1646062
Staphylococcus_#_aureus_!_M1063_{_genomic_}_scaffold_acumZ-supercont1.8_whole_genome_shotgun_sequence|gi|486416926|ref|NZ_KB821910.1|	0.015	99.985	100	678576	678676
Staphylococcus_#_aureus_!_M1068_{_genomic_}_scaffold_acunM-supercont1.4_whole_genome_shotgun_sequence|gi|487394500|ref|NZ_KB821930.1|	0.038	99.962	100	261342	261442
Staphylococcus_#_aureus_!_M1068_{_genomic_}_scaffold_acunM-supercont1.5_whole_genome_shotgun_sequence|gi|487394509|ref|NZ_KB821931.1|	0.483	99.517	100	20621	20721
Staphylococcus_#_aureus_!_M1076_{_genomic_}_scaffold_acumq-supercont1.1_whole_genome_shotgun_sequence|gi|486417634|ref|NZ_KB821951.1|	0.007	99.993	100	1493460	1493560
Staphylococcus_#_aureus_!_M1078_{_genomic_}_scaffold_aculT-supercont1.3_whole_genome_shotgun_sequence|gi|487400812|ref|NZ_KB822364.1|	0.057	99.943	100	175870	175970
Staphylococcus_#_aureus_!_M1092_{_genomic_}_scaffold_acunK-supercont1.1_whole_genome_shotgun_sequence|gi|486421969|ref|NZ_KB821957.1|	0.008	99.992	100	1199071	1199171
Staphylococcus_#_aureus_!_M1092_{_genomic_}_scaffold_acunK-supercont1.5_whole_genome_shotgun_sequence|gi|486422832|ref|NZ_KB821961.1|	0.083	99.917	100	120648	120748
Staphylococcus_#_aureus_!_M1093_{_genomic_}_scaffold_acumQ-supercont1.3_whole_genome_shotgun_sequence|gi|486424345|ref|NZ_KB821948.1|	0.012	99.988	100	858263	858363
Staphylococcus_#_aureus_!_M1095_{_genomic_}_scaffold_aculR-supercont1.3_whole_genome_shotgun_sequence|gi|486425960|ref|NZ_KB821981.1|	0.016	99.984	100	628171	628271
Staphylococcus_#_aureus_!_M1103_{_genomic_}_scaffold_acump-supercont1.1_whole_genome_shotgun_sequence|gi|486428532|ref|NZ_KB822034.1|	0.005	99.995	100	1963679	1963779
Staphylococcus_#_aureus_!_M1103_{_genomic_}_scaffold_acump-supercont1.5_whole_genome_shotgun_sequence|gi|486429182|ref|NZ_KB822038.1|	0.011	99.989	100	932075	932175
Staphylococcus_#_aureus_!_M1109_{_genomic_}_scaffold_acunD-supercont1.3_whole_genome_shotgun_sequence|gi|487395342|ref|NZ_KB822014.1|	0.006	99.994	100	1585927	1586027
Staphylococcus_#_aureus_!_M1109_{_genomic_}_scaffold_acunD-supercont1.9_whole_genome_shotgun_sequence|gi|487395760|ref|NZ_KB822020.1|	0.209	99.791	100	47711	47811
Staphylococcus_#_aureus_!_M1119_{_genomic_}_scaffold_acunS-supercont1.10_whole_genome_shotgun_sequence|gi|486430316|ref|NZ_KB822022.1|	0.297	99.703	100	33586	33686
Staphylococcus_#_aureus_!_M1119_{_genomic_}_scaffold_acunS-supercont1.1_whole_genome_shotgun_sequence|gi|486430214|ref|NZ_KB822021.1|	0.009	99.991	100	1071693	1071793
Staphylococcus_#_aureus_!_M1119_{_genomic_}_scaffold_acunS-supercont1.5_whole_genome_shotgun_sequence|gi|486431063|ref|NZ_KB822029.1|	0.015	99.985	100	648527	648627
Staphylococcus_#_aureus_!_M1126_{_genomic_}_scaffold_acumd-supercont1.6_whole_genome_shotgun_sequence|gi|487395951|ref|NZ_KB822003.1|	0.039	99.961	100	255781	255881
Staphylococcus_#_aureus_!_M1142_{_genomic_}_scaffold_acumk-supercont1.1_whole_genome_shotgun_sequence|gi|487396127|ref|NZ_KB821988.1|	0.006	99.994	100	1575242	1575342
Staphylococcus_#_aureus_!_M1167_{_genomic_}_scaffold_acuns-supercont1.4_whole_genome_shotgun_sequence|gi|486432251|ref|NZ_KB822045.1|	0.039	99.961	100	255844	255944
Staphylococcus_#_aureus_!_M1170_{_genomic_}_scaffold_acume-supercont1.1_whole_genome_shotgun_sequence|gi|486434630|ref|NZ_KB822067.1|	0.003	99.997	100	2871149	2871249
Staphylococcus_#_aureus_!_M1198_{_genomic_}_scaffold_acumf-supercont1.1_whole_genome_shotgun_sequence|gi|486435575|ref|NZ_KB822051.1|	0.009	99.991	100	1061315	1061415
Staphylococcus_#_aureus_!_M1215_{_genomic_}_scaffold_aculX-supercont1.1_whole_genome_shotgun_sequence|gi|486506047|ref|NZ_KB822069.1|	0.004	99.996	100	2827330	2827430
Staphylococcus_#_aureus_!_M1229_{_genomic_}_scaffold_acunX-supercont1.1_whole_genome_shotgun_sequence|gi|486622114|ref|NZ_KB822108.1|	0.01	99.99	100	1034673	1034773
Staphylococcus_#_aureus_!_M1244_{_genomic_}_scaffold_acumu-supercont1.10_whole_genome_shotgun_sequence|gi|487396892|ref|NZ_KB822087.1|	0.033	99.967	100	303751	303851
Staphylococcus_#_aureus_!_M1244_{_genomic_}_scaffold_acumu-supercont1.11_whole_genome_shotgun_sequence|gi|487396942|ref|NZ_KB822088.1|	0.016	99.984	100	606007	606107
Staphylococcus_#_aureus_!_M1244_{_genomic_}_scaffold_acumu-supercont1.3_whole_genome_shotgun_sequence|gi|487397020|ref|NZ_KB822092.1|	0.059	99.941	100	170755	170855
Staphylococcus_#_aureus_!_M1248_{_genomic_}_scaffold_acunw-supercont1.4_whole_genome_shotgun_sequence|gi|486650021|ref|NZ_KB822102.1|	0.03	99.97	100	329795	329895
Staphylococcus_#_aureus_!_M1255_{_genomic_}_scaffold_acunA-supercont1.7_whole_genome_shotgun_sequence|gi|486697825|ref|NZ_KB822122.1|	0.016	99.984	100	631047	631147
Staphylococcus_#_aureus_!_M1277_{_genomic_}_scaffold_acung-supercont1.2_whole_genome_shotgun_sequence|gi|486747506|ref|NZ_KB822137.1|	0.009	99.991	100	1053802	1053902
Staphylococcus_#_aureus_!_M1277_{_genomic_}_scaffold_acung-supercont1.4_whole_genome_shotgun_sequence|gi|486766472|ref|NZ_KB822139.1|	0.013	99.987	100	796953	797053
Staphylococcus_#_aureus_!_M1286_{_genomic_}_scaffold_acuob-supercont1.3_whole_genome_shotgun_sequence|gi|487398125|ref|NZ_KB822149.1|	0.044	99.956	100	228254	228354
Staphylococcus_#_aureus_!_M1286_{_genomic_}_scaffold_acuob-supercont1.6_whole_genome_shotgun_sequence|gi|487398220|ref|NZ_KB822152.1|	0.043	99.957	100	232030	232130
Staphylococcus_#_aureus_!_M1291_{_genomic_}_scaffold_acumW-supercont1.5_whole_genome_shotgun_sequence|gi|486798074|ref|NZ_KB822170.1|	0.019	99.981	100	528399	528499
Staphylococcus_#_aureus_!_M1291_{_genomic_}_scaffold_acumW-supercont1.6_whole_genome_shotgun_sequence|gi|486811309|ref|NZ_KB822171.1|	0.008	99.992	100	1228107	1228207
Staphylococcus_#_aureus_!_M1309_{_genomic_}_scaffold_acunC-supercont1.5_whole_genome_shotgun_sequence|gi|487398450|ref|NZ_KB822160.1|	0.059	99.941	100	169565	169665
Staphylococcus_#_aureus_!_M1320_{_genomic_}_scaffold_acumx-supercont1.1_whole_genome_shotgun_sequence|gi|486868496|ref|NZ_KB822182.1|	0.007	99.993	100	1451041	1451141
Staphylococcus_#_aureus_!_M1321_{_genomic_}_scaffold_acunh-supercont1.11_whole_genome_shotgun_sequence|gi|486895834|ref|NZ_KB822188.1|	0.016	99.984	100	630450	630550
Staphylococcus_#_aureus_!_M1321_{_genomic_}_scaffold_acunh-supercont1.2_whole_genome_shotgun_sequence|gi|486904299|ref|NZ_KB822192.1|	0.024	99.976	100	418831	418931
Staphylococcus_#_aureus_!_M1321_{_genomic_}_scaffold_acunh-supercont1.4_whole_genome_shotgun_sequence|gi|486915382|ref|NZ_KB822194.1|	0.028	99.972	100	360411	360511
Staphylococcus_#_aureus_!_M1321_{_genomic_}_scaffold_acunh-supercont1.7_whole_genome_shotgun_sequence|gi|486929038|ref|NZ_KB822197.1|	0.145	99.855	100	68939	69039
Staphylococcus_#_aureus_!_M1321_{_genomic_}_scaffold_acunh-supercont1.8_whole_genome_shotgun_sequence|gi|486931980|ref|NZ_KB822198.1|	0.062	99.938	100	162152	162252
Staphylococcus_#_aureus_!_M1322_{_genomic_}_scaffold_acumT-supercont1.1_whole_genome_shotgun_sequence|gi|486939422|ref|NZ_KB822200.1|	0.044	99.956	100	225347	225447
Staphylococcus_#_aureus_!_M1359_{_genomic_}_scaffold_acumL-supercont1.2_whole_genome_shotgun_sequence|gi|486991067|ref|NZ_KB822205.1|	0.012	99.988	100	862006	862106
Staphylococcus_#_aureus_!_M1374_{_genomic_}_scaffold_acumR-supercont1.2_whole_genome_shotgun_sequence|gi|487398605|ref|NZ_KB822220.1|	0.026	99.974	100	388698	388798
Staphylococcus_#_aureus_!_M1374_{_genomic_}_scaffold_acumR-supercont1.4_whole_genome_shotgun_sequence|gi|487398652|ref|NZ_KB822222.1|	0.039	99.961	100	254597	254697
Staphylococcus_#_aureus_!_M1374_{_genomic_}_scaffold_acumR-supercont1.6_whole_genome_shotgun_sequence|gi|487398680|ref|NZ_KB822224.1|	0.476	99.524	100	20912	21012
Staphylococcus_#_aureus_!_M1405_{_genomic_}_scaffold_acumh-supercont1.5_whole_genome_shotgun_sequence|gi|487399089|ref|NZ_KB822545.1|	0.039	99.961	100	257773	257873
Staphylococcus_#_aureus_!_M1407_{_genomic_}_scaffold_acuod-supercont1.1_whole_genome_shotgun_sequence|gi|487401530|ref|NZ_KB822379.1|	0.006	99.994	100	1618845	1618945
Staphylococcus_#_aureus_!_M1462_{_genomic_}_scaffold_acumH-supercont1.2_whole_genome_shotgun_sequence|gi|487135374|ref|NZ_KB822551.1|	0.59	99.41	100	16862	16962
Staphylococcus_#_aureus_!_M1463_{_genomic_}_scaffold_acums-supercont1.4_whole_genome_shotgun_sequence|gi|487136173|ref|NZ_KB822559.1|	0.043	99.957	100	232344	232444
Staphylococcus_#_aureus_!_M1463_{_genomic_}_scaffold_acums-supercont1.7_whole_genome_shotgun_sequence|gi|487136278|ref|NZ_KB822562.1|	0.493	99.507	100	20178	20278
Staphylococcus_#_aureus_!_M1466_{_genomic_}_scaffold_acumV-supercont1.7_whole_genome_shotgun_sequence|gi|487401900|ref|NZ_KB822399.1|	0.008	99.992	100	1267344	1267444
Staphylococcus_#_aureus_!_M1466_{_genomic_}_scaffold_acumV-supercont1.8_whole_genome_shotgun_sequence|gi|487401916|ref|NZ_KB822400.1|	1.237	98.763	100	7983	8083
Staphylococcus_#_aureus_!_M1466_{_genomic_}_scaffold_acumV-supercont1.9_whole_genome_shotgun_sequence|gi|487401932|ref|NZ_KB822401.1|	0.033	99.967	100	306080	306180
Staphylococcus_#_aureus_!_M1481_{_genomic_}_scaffold_aculQ-supercont1.2_whole_genome_shotgun_sequence|gi|487136608|ref|NZ_KB822249.1|	0.009	99.991	100	1061730	1061830
Staphylococcus_#_aureus_!_M1510_{_genomic_}_scaffold_aculM-supercont1.2_whole_genome_shotgun_sequence|gi|487399506|ref|NZ_KB822258.1|	0.008	99.992	100	1293523	1293623
Staphylococcus_#_aureus_!_M1521_{_genomic_}_scaffold_acunr-supercont1.3_whole_genome_shotgun_sequence|gi|487137370|ref|NZ_KB822270.1|	0.017	99.983	100	604161	604261
Staphylococcus_#_aureus_!_M1521_{_genomic_}_scaffold_acunr-supercont1.4_whole_genome_shotgun_sequence|gi|487137439|ref|NZ_KB822271.1|	0.016	99.984	100	626351	626451
Staphylococcus_#_aureus_!_M1531_{_genomic_}_scaffold_acunL-supercont1.3_whole_genome_shotgun_sequence|gi|487137976|ref|NZ_KB822265.1|	0.218	99.782	100	45826	45926
Staphylococcus_#_aureus_!_M1544_{_genomic_}_scaffold_acunm-supercont1.10_whole_genome_shotgun_sequence|gi|487138787|ref|NZ_KB822275.1|	0.016	99.984	100	622842	622942
Staphylococcus_#_aureus_!_M1544_{_genomic_}_scaffold_acunm-supercont1.5_whole_genome_shotgun_sequence|gi|487139035|ref|NZ_KB822280.1|	0.014	99.986	100	699596	699696
Staphylococcus_#_aureus_!_M1556_{_genomic_}_scaffold_acund-supercont1.2_whole_genome_shotgun_sequence|gi|487139644|ref|NZ_KB822293.1|	0.014	99.986	100	729981	730081
Staphylococcus_#_aureus_!_M1556_{_genomic_}_scaffold_acund-supercont1.3_whole_genome_shotgun_sequence|gi|487139723|ref|NZ_KB822294.1|	0.03	99.97	100	338743	338843
Staphylococcus_#_aureus_!_M1556_{_genomic_}_scaffold_acund-supercont1.4_whole_genome_shotgun_sequence|gi|487139757|ref|NZ_KB822295.1|	0.464	99.536	100	21466	21566
Staphylococcus_#_aureus_!_M1563_{_genomic_}_scaffold_acuoe-supercont1.3_whole_genome_shotgun_sequence|gi|487158594|ref|NZ_KB822306.1|	0.009	99.991	100	1140474	1140574
Staphylococcus_#_aureus_!_M1563_{_genomic_}_scaffold_acuoe-supercont1.4_whole_genome_shotgun_sequence|gi|487160870|ref|NZ_KB822307.1|	0.066	99.934	100	152089	152189
Staphylococcus_#_aureus_!_M1563_{_genomic_}_scaffold_acuoe-supercont1.5_whole_genome_shotgun_sequence|gi|487162436|ref|NZ_KB822308.1|	0.026	99.974	100	378901	379001
Staphylococcus_#_aureus_!_M1563_{_genomic_}_scaffold_acuoe-supercont1.6_whole_genome_shotgun_sequence|gi|487166501|ref|NZ_KB822309.1|	0.023	99.977	100	438485	438585
Staphylococcus_#_aureus_!_M1565_{_genomic_}_scaffold_acunk-supercont1.2_whole_genome_shotgun_sequence|gi|487189945|ref|NZ_KB822300.1|	0.016	99.984	100	626452	626552
Staphylococcus_#_aureus_!_M1578_{_genomic_}_scaffold_aculL-supercont1.1_whole_genome_shotgun_sequence|gi|487211632|ref|NZ_KB822320.1|	0.011	99.989	100	895779	895879
Staphylococcus_#_aureus_!_M1578_{_genomic_}_scaffold_aculL-supercont1.2_whole_genome_shotgun_sequence|gi|487219486|ref|NZ_KB822321.1|	0.01	99.99	100	1037976	1038076
Staphylococcus_#_aureus_!_plasmid_{_SAP077B_}_complete_sequence|gi|260667563|ref|NC_013341.1|	0.75	99.25	100	13242	13342
Staphylococcus_#_aureus_!_subsp._{_aureus_}_55/2053_genomic_scaffold_supercont1.15_whole_genome_shotgun_sequence|gi|257426198|ref|NZ_GG700547.1|	0.091	99.909	100	110172	110272
Staphylococcus_#_aureus_!_subsp._{_aureus_}_55/2053_genomic_scaffold_supercont1.6_whole_genome_shotgun_sequence|gi|257425560|ref|NZ_GG700538.1|	0.024	99.976	100	418221	418321
Staphylococcus_#_aureus_!_subsp._{_aureus_}_58-424_genomic_scaffold_supercont1.10_whole_genome_shotgun_sequence|gi|293503318|ref|NZ_GG749063.1|	0.023	99.977	100	426192	426292
Staphylococcus_#_aureus_!_subsp._{_aureus_}_58-424_genomic_scaffold_supercont1.17_whole_genome_shotgun_sequence|gi|293508980|ref|NZ_GG749070.1|	0.091	99.909	100	110142	110242
Staphylococcus_#_aureus_!_subsp._{_aureus_}_65-1322_genomic_scaffold_supercont1.10_whole_genome_shotgun_sequence|gi|257428858|ref|NZ_GG700568.1|	0.091	99.909	100	109548	109648
Staphylococcus_#_aureus_!_subsp._{_aureus_}_68-397_genomic_scaffold_supercont1.11_whole_genome_shotgun_sequence|gi|257431076|ref|NZ_GG700584.1|	0.044	99.956	100	227296	227396
Staphylococcus_#_aureus_!_subsp._{_aureus_}_68-397_genomic_scaffold_supercont1.15_whole_genome_shotgun_sequence|gi|257431468|ref|NZ_GG700588.1|	0.092	99.908	100	109134	109234
Staphylococcus_#_aureus_!_subsp._{_aureus_}_68-397_genomic_scaffold_supercont1.4_whole_genome_shotgun_sequence|gi|257429934|ref|NZ_GG700577.1|	0.034	99.966	100	297712	297812
Staphylococcus_#_aureus_!_subsp._{_aureus_}_68-397_genomic_scaffold_supercont1.8_whole_genome_shotgun_sequence|gi|257430852|ref|NZ_GG700581.1|	0.072	99.928	100	139507	139607
Staphylococcus_#_aureus_!_subsp._{_aureus_}_A017934/97_genomic_scaffold_supercont1.14_whole_genome_shotgun_sequence|gi|283958620|ref|NZ_GG731508.1|	0.053	99.947	100	186840	186940
Staphylococcus_#_aureus_!_subsp._{_aureus_}_A017934/97_genomic_scaffold_supercont1.15_whole_genome_shotgun_sequence|gi|283958840|ref|NZ_GG731509.1|	0.09	99.91	100	111358	111458
Staphylococcus_#_aureus_!_subsp._{_aureus_}_ATCC_51811_genomic_scaffold_SCAFFOLD3_whole_genome_shotgun_sequence|gi|297210121|ref|NZ_GG774482.1|	0.077	99.923	100	130067	130167
Staphylococcus_#_aureus_!_subsp._{_aureus_}_Btn1260_genomic_scaffold_supercont1.11_whole_genome_shotgun_sequence|gi|282906406|ref|NZ_GG730266.1|	0.09	99.91	100	111111	111211
Staphylococcus_#_aureus_!_subsp._{_aureus_}_C101_genomic_scaffold_supercont1.12_whole_genome_shotgun_sequence|gi|282924788|ref|NZ_GG730131.1|	0.042	99.958	100	237931	238031
Staphylococcus_#_aureus_!_subsp._{_aureus_}_C101_genomic_scaffold_supercont1.17_whole_genome_shotgun_sequence|gi|282925449|ref|NZ_GG730136.1|	0.091	99.909	100	109736	109836
Staphylococcus_#_aureus_!_subsp._{_aureus_}_C160_genomic_scaffold_supercont1.21_whole_genome_shotgun_sequence|gi|282904727|ref|NZ_GG730293.1|	0.089	99.911	100	111711	111811
Staphylococcus_#_aureus_!_subsp._{_aureus_}_CM05_genomic_scaffold_Scfld143_whole_genome_shotgun_sequence|gi|424772427|ref|NZ_JH806530.1|	10.977	89.023	100	811	911
Staphylococcus_#_aureus_!_subsp._{_aureus_}_CM05_genomic_scaffold_Scfld153_whole_genome_shotgun_sequence|gi|424772886|ref|NZ_JH806533.1|	0.139	99.861	100	71889	71989
Staphylococcus_#_aureus_!_subsp._{_aureus_}_CM05_genomic_scaffold_Scfld401_whole_genome_shotgun_sequence|gi|424774983|ref|NZ_JH806557.1|	0.059	99.941	100	169299	169399
Staphylococcus_#_aureus_!_subsp._{_aureus_}_CM05_genomic_scaffold_Scfld490_whole_genome_shotgun_sequence|gi|424776183|ref|NZ_JH806563.1|	0.105	99.895	100	94891	94991
Staphylococcus_#_aureus_!_subsp._{_aureus_}_CM05_genomic_scaffold_Scfld92_whole_genome_shotgun_sequence|gi|424770665|ref|NZ_JH806506.1|	0.298	99.702	100	33493	33593
Staphylococcus_#_aureus_!_subsp._{_aureus_}_D139_genomic_scaffold_supercont1.20_whole_genome_shotgun_sequence|gi|282917134|ref|NZ_GG730178.1|	0.056	99.944	100	178354	178454
Staphylococcus_#_aureus_!_subsp._{_aureus_}_D139_genomic_scaffold_supercont1.22_whole_genome_shotgun_sequence|gi|282917409|ref|NZ_GG730180.1|	0.09	99.91	100	110708	110808
Staphylococcus_#_aureus_!_subsp._{_aureus_}_E1410_genomic_scaffold_supercont1.15_whole_genome_shotgun_sequence|gi|257434178|ref|NZ_GG700611.1|	0.092	99.908	100	108897	108997
Staphylococcus_#_aureus_!_subsp._{_aureus_}_EMRSA16_genomic_scaffold_supercont1.13_whole_genome_shotgun_sequence|gi|295428232|ref|NZ_GG770525.1|	0.042	99.958	100	235983	236083
Staphylococcus_#_aureus_!_subsp._{_aureus_}_EMRSA16_genomic_scaffold_supercont1.16_whole_genome_shotgun_sequence|gi|295428648|ref|NZ_GG770528.1|	0.089	99.911	100	112676	112776
Staphylococcus_#_aureus_!_subsp._{_aureus_}_H19_genomic_scaffold_supercont1.11_whole_genome_shotgun_sequence|gi|283771229|ref|NZ_GG730345.1|	0.091	99.909	100	109663	109763
Staphylococcus_#_aureus_!_subsp._{_aureus_}_H19_genomic_scaffold_supercont1.9_whole_genome_shotgun_sequence|gi|283770944|ref|NZ_GG730343.1|	0.043	99.957	100	233373	233473
Staphylococcus_#_aureus_!_subsp._{_aureus_}_M1015_genomic_scaffold_supercont1.11_whole_genome_shotgun_sequence|gi|293537077|ref|NZ_GG749006.1|	0.042	99.958	100	238271	238371
Staphylococcus_#_aureus_!_subsp._{_aureus_}_M1015_genomic_scaffold_supercont1.16_whole_genome_shotgun_sequence|gi|293547492|ref|NZ_GG749011.1|	0.091	99.909	100	109550	109650
Staphylococcus_#_aureus_!_subsp._{_aureus_}_M809_genomic_scaffold_supercont1.14_whole_genome_shotgun_sequence|gi|293510534|ref|NZ_GG749312.1|	0.042	99.958	100	237600	237700
Staphylococcus_#_aureus_!_subsp._{_aureus_}_M809_genomic_scaffold_supercont1.20_whole_genome_shotgun_sequence|gi|293510892|ref|NZ_GG749318.1|	0.092	99.908	100	109006	109106
Staphylococcus_#_aureus_!_subsp._{_aureus_}_M876_genomic_scaffold_supercont1.13_whole_genome_shotgun_sequence|gi|257437091|ref|NZ_GG700626.1|	0.091	99.909	100	109428	109528
Staphylococcus_#_aureus_!_subsp._{_aureus_}_M899_genomic_scaffold_supercont1.14_whole_genome_shotgun_sequence|gi|282914906|ref|NZ_GG730203.1|	0.092	99.908	100	108866	108966
Staphylococcus_#_aureus_!_subsp._{_aureus_}_M899_genomic_scaffold_supercont1.8_whole_genome_shotgun_sequence|gi|282914286|ref|NZ_GG730197.1|	0.026	99.974	100	390922	391022
Staphylococcus_#_aureus_!_subsp._{_aureus_}_MRSA131_genomic_scaffold_Scfld253_whole_genome_shotgun_sequence|gi|422747121|ref|NZ_GL638191.1|	0.113	99.887	100	88540	88640
Staphylococcus_#_aureus_!_subsp._{_aureus_}_MRSA177_genomic_scaffold_Scfld384_whole_genome_shotgun_sequence|gi|422744230|ref|NZ_GL638236.1|	0.085	99.915	100	118093	118193
Staphylococcus_#_aureus_!_subsp._{_aureus_}_MRSA177_genomic_scaffold_Scfld68_whole_genome_shotgun_sequence|gi|422743148|ref|NZ_GL638216.1|	0.063	99.937	100	158669	158769
Staphylococcus_#_aureus_!_subsp._{_aureus_}_TCH130_genomic_scaffold_SCAFFOLD18_whole_genome_shotgun_sequence|gi|255925780|ref|NZ_GG698175.1|	5.522	94.478	100	1711	1811
Staphylococcus_#_aureus_!_subsp._{_aureus_}_TCH130_genomic_scaffold_SCAFFOLD5_whole_genome_shotgun_sequence|gi|255925767|ref|NZ_GG698162.1|	0.094	99.906	100	106754	106854
Staphylococcus_#_aureus_!_subsp._{_aureus_}_TCH130_genomic_scaffold_SCAFFOLD8_whole_genome_shotgun_sequence|gi|255925770|ref|NZ_GG698165.1|	0.073	99.927	100	136845	136945
Staphylococcus_#_aureus_!_subsp._{_aureus_}_USA300_TCH959_genomic_scaffold_SCAFFOLD4_whole_genome_shotgun_sequence|gi|255926320|ref|NZ_GG697988.1|	0.091	99.909	100	109674	109774
Staphylococcus_#_aureus_!_subsp._{_aureus_}_WBG10049_genomic_scaffold_supercont1.8_whole_genome_shotgun_sequence|gi|282911628|ref|NZ_GG730215.1|	0.091	99.909	100	109197	109297
Staphylococcus_#_aureus_!_subsp._{_aureus_}_WW2703/97_genomic_scaffold_supercont1.28_whole_genome_shotgun_sequence|gi|282909179|ref|NZ_GG730247.1|	0.058	99.942	100	171840	171940
Staphylococcus_#_aureus_!_subsp._{_aureus_}_WW2703/97_genomic_scaffold_supercont1.29_whole_genome_shotgun_sequence|gi|282909374|ref|NZ_GG730248.1|	0.088	99.912	100	113128	113228
Staphylococcus_#_aureus_!_subsp._{_aureus_}_WW2703/97_genomic_scaffold_supercont1.35_whole_genome_shotgun_sequence|gi|282909609|ref|NZ_GG730254.1|	0.028	99.972	100	353315	353415
Staphylococcus_#_caprae_!_C87_{_genomic_}_scaffold_supercont1.12_whole_genome_shotgun_sequence|gi|314934230|ref|NZ_GL545278.1|	0.011	99.989	100	884776	884876
Staphylococcus_#_caprae_!_C87_{_genomic_}_scaffold_supercont1.1_whole_genome_shotgun_sequence|gi|314932701|ref|NZ_GL545267.1|	0.252	99.748	100	39591	39691
Staphylococcus_#_caprae_!_C87_{_genomic_}_scaffold_supercont1.5_whole_genome_shotgun_sequence|gi|314932855|ref|NZ_GL545271.1|	0.042	99.958	100	240789	240889
Staphylococcus_#_caprae_!_C87_{_genomic_}_scaffold_supercont1.6_whole_genome_shotgun_sequence|gi|314933097|ref|NZ_GL545272.1|	0.01	99.99	100	978593	978693
Staphylococcus_#_caprae_!_C87_{_genomic_}_scaffold_supercont1.7_whole_genome_shotgun_sequence|gi|314934024|ref|NZ_GL545273.1|	13.089	86.911	100	664	764
Staphylococcus_#_epidermidis_!_APO27_{_genomic_}_scaffold_APO27_scaffold110_whole_genome_shotgun_sequence|gi|520956196|ref|NZ_KE365223.1|	0.576	99.424	100	17248	17348
Staphylococcus_#_epidermidis_!_APO35_{_genomic_}_scaffold_APO35_scaffold42_whole_genome_shotgun_sequence|gi|520973162|ref|NZ_KE365881.1|	0.3	99.7	100	33263	33363
Staphylococcus_#_epidermidis_!_BCM-HMP0060_{_genomic_}_scaffold_SCAFFOLD12_whole_genome_shotgun_sequence|gi|254281381|ref|NZ_GG696738.1|	0.253	99.747	100	39449	39549
Staphylococcus_#_epidermidis_!_BCM-HMP0060_{_genomic_}_scaffold_SCAFFOLD14_whole_genome_shotgun_sequence|gi|254281383|ref|NZ_GG696740.1|	6.41	93.59	100	1460	1560
Staphylococcus_#_epidermidis_!_BCM-HMP0060_{_genomic_}_scaffold_SCAFFOLD2_whole_genome_shotgun_sequence|gi|254281371|ref|NZ_GG696728.1|	0.007	99.993	100	1338886	1338986
Staphylococcus_#_epidermidis_!_BVS058A4_{_genomic_}_scaffold_supercont1.1_whole_genome_shotgun_sequence|gi|448879114|ref|NZ_KB373335.1|	0.008	99.992	100	1182690	1182790
Staphylococcus_#_epidermidis_!_BVS058A4_{_genomic_}_scaffold_supercont1.2_whole_genome_shotgun_sequence|gi|448879115|ref|NZ_KB373336.1|	0.012	99.988	100	842038	842138
Staphylococcus_#_epidermidis_!_BVS058A4_{_genomic_}_scaffold_supercont1.4_whole_genome_shotgun_sequence|gi|448879117|ref|NZ_KB373338.1|	0.103	99.897	100	97374	97474
Staphylococcus_#_epidermidis_!_CIM40_{_genomic_}_scaffold_CIM40_scaffold161_whole_genome_shotgun_sequence|gi|520974705|ref|NZ_KE366013.1|	37.313	62.687	100	168	268
Staphylococcus_#_epidermidis_!_CIM40_{_genomic_}_scaffold_CIM40_scaffold83_whole_genome_shotgun_sequence|gi|520975151|ref|NZ_KE366264.1|	0.225	99.775	100	44342	44442
Staphylococcus_#_epidermidis_!_M0881_{_genomic_}_scaffold_acumm-supercont1.2_whole_genome_shotgun_sequence|gi|489046772|ref|NZ_KB821722.1|	0.011	99.989	100	900369	900469
Staphylococcus_#_epidermidis_!_M23864:W1_{_genomic_}_scaffold_SCAFFOLD13_whole_genome_shotgun_sequence|gi|254213023|ref|NZ_GG696785.1|	0.253	99.747	100	39373	39473
Staphylococcus_#_epidermidis_!_M23864:W1_{_genomic_}_scaffold_SCAFFOLD1_whole_genome_shotgun_sequence|gi|254213011|ref|NZ_GG696773.1|	0.007	99.993	100	1392492	1392592
Staphylococcus_#_epidermidis_!_M23864:W2(grey)_{_genomic_}_scaffold_SCAFFOLD2_whole_genome_shotgun_sequence|gi|293368504|ref|NZ_GG749256.1|	0.018	99.982	100	561344	561444
Staphylococcus_#_epidermidis_!_M23864:W2(grey)_{_genomic_}_scaffold_SCAFFOLD8_whole_genome_shotgun_sequence|gi|293368510|ref|NZ_GG749262.1|	0.253	99.747	100	39433	39533
Staphylococcus_#_epidermidis_!_MC16_{_genomic_}_scaffold_MC16_scaffold130_whole_genome_shotgun_sequence|gi|520975256|ref|NZ_KE369953.1|	0.314	99.686	100	31717	31817
Staphylococcus_#_epidermidis_!_MC19_{_genomic_}_scaffold_MC19_scaffold132_whole_genome_shotgun_sequence|gi|520976035|ref|NZ_KE370362.1|	0.245	99.755	100	40668	40768
Staphylococcus_#_epidermidis_!_MC28_{_genomic_}_scaffold_MC28_scaffold81_whole_genome_shotgun_sequence|gi|520977296|ref|NZ_KE366613.1|	0.262	99.738	100	38020	38120
Staphylococcus_#_epidermidis_!_Scl19_{_genomic_}_scaffold_Scl19_scaffold75_whole_genome_shotgun_sequence|gi|520977749|ref|NZ_KE366906.1|	0.245	99.755	100	40761	40861
Staphylococcus_#_epidermidis_!_Scl22_{_genomic_}_scaffold_Scl22_scaffold260_whole_genome_shotgun_sequence|gi|520978082|ref|NZ_KE367112.1|	0.969	99.031	100	10217	10317
Staphylococcus_#_epidermidis_!_Scl25_{_genomic_}_scaffold_Scl25_scaffold200_whole_genome_shotgun_sequence|gi|520978857|ref|NZ_KE367536.1|	31.646	68.354	100	216	316
Staphylococcus_#_epidermidis_!_Scl25_{_genomic_}_scaffold_Scl25_scaffold353_whole_genome_shotgun_sequence|gi|520979188|ref|NZ_KE367705.1|	0.634	99.366	100	15682	15782
Staphylococcus_#_epidermidis_!_Scl31_{_genomic_}_scaffold_Scl31_scaffold367_whole_genome_shotgun_sequence|gi|520979910|ref|NZ_KE368099.1|	31.646	68.354	100	216	316
Staphylococcus_#_epidermidis_!_Scl31_{_genomic_}_scaffold_Scl31_scaffold498_whole_genome_shotgun_sequence|gi|520980168|ref|NZ_KE368244.1|	44.843	55.157	100	123	223
Staphylococcus_#_epidermidis_!_Sentile1_{_genomic_}_scaffold_Sentile1_scaffold218_whole_genome_shotgun_sequence|gi|520980693|ref|NZ_KE368552.1|	2.588	97.412	100	3764	3864
Staphylococcus_#_epidermidis_!_Sentile2_{_genomic_}_scaffold_Sentile2_scaffold197_whole_genome_shotgun_sequence|gi|520981271|ref|NZ_KE368896.1|	0.554	99.446	100	17949	18049
Staphylococcus_#_epidermidis_!_W23144_{_genomic_}_scaffold_SCAFFOLD2_whole_genome_shotgun_sequence|gi|254212920|ref|NZ_GG696800.1|	0.015	99.985	100	650336	650436
Staphylococcus_#_epidermidis_!_W23144_{_genomic_}_scaffold_SCAFFOLD61_whole_genome_shotgun_sequence|gi|254212979|ref|NZ_GG696859.1|	31.847	68.153	100	214	314
Staphylococcus_#_epidermidis_!_W23144_{_genomic_}_scaffold_SCAFFOLD82_whole_genome_shotgun_sequence|gi|254213000|ref|NZ_GG696880.1|	42.017	57.983	100	138	238
Staphylococcus_#_epidermidis_!_WI05_{_genomic_}_scaffold_WI05_scaffold48_whole_genome_shotgun_sequence|gi|520982224|ref|NZ_KE369483.1|	0.277	99.723	100	35964	36064
Staphylococcus_#_epidermidis_!_WI09_{_genomic_}_scaffold_WI09_scaffold34_whole_genome_shotgun_sequence|gi|520982724|ref|NZ_KE369807.1|	0.537	99.463	100	18534	18634
Staphylococcus_#_hominis_!_subsp._{_hominis_}_C80_genomic_scaffold_supercont1.4_whole_genome_shotgun_sequence|gi|314935425|ref|NZ_GL545255.1|	0.021	99.979	100	480499	480599
Staphylococcus_#_hominis_!_subsp._{_hominis_}_C80_genomic_scaffold_supercont1.9_whole_genome_shotgun_sequence|gi|314936087|ref|NZ_GL545260.1|	0.009	99.991	100	1140816	1140916
Staphylococcus_#_lugdunensis_!_M23590_{_genomic_}_scaffold_SCAFFOLD1_whole_genome_shotgun_sequence|gi|319430684|ref|NZ_GL622351.1|	0.008	99.992	100	1265128	1265228
Staphylococcus_#_lugdunensis_!_M23590_{_genomic_}_scaffold_SCAFFOLD2_whole_genome_shotgun_sequence|gi|319430685|ref|NZ_GL622352.1|	0.01	99.99	100	1009887	1009987
Staphylococcus_#_simulans_!_ACS-120-V-Sch1_{_genomic_}_scaffold_supercont1.1_whole_genome_shotgun_sequence|gi|448879137|ref|NZ_KB373326.1|	0.01	99.99	100	1023031	1023131
Staphylococcus_#_sp._!_HGB0015_{_genomic_}_scaffold_aczIz-supercont1.2_whole_genome_shotgun_sequence|gi|512478261|ref|NZ_KE150418.1|	0.01	99.99	100	1006150	1006250
Staphylococcus_#_sp._!_HGB0015_{_genomic_}_scaffold_aczIz-supercont1.3_whole_genome_shotgun_sequence|gi|512478285|ref|NZ_KE150419.1|	0.242	99.758	100	41291	41391
Staphylococcus_#_aureus_!_M0478_{_genomic_}_scaffold_acrGZ-supercont1.6_whole_genome_shotgun_sequence|gi|486313174|ref|NZ_KB821381.1|	0.109	99.891	99	90455	90554
Staphylococcus_#_aureus_!_subsp._{_aureus_}_E1410_genomic_scaffold_supercont1.10_whole_genome_shotgun_sequence|gi|257433958|ref|NZ_GG700606.1|	6.148	93.852	60	916	976

## Sheet: 1k
Organism	Genome_Coverage(%)	Genome_Not_Covered(%)	Genome_Coverage	Genome_Not_Covered	Genome_Size
Staphylococcus_#_aureus_!_subsp._{_aureus_}_str._Newman_chromosome_complete_genome|gi|151220212|ref|NC_009641.1|	6.898	93.102	198599	2680298	2878897
Staphylococcus_#_aureus_!_subsp._{_aureus_}_USA300_FPR3757_chromosome_complete_genome|gi|87159884|ref|NC_007793.1|	6.794	93.206	195165	2677604	2872769
Staphylococcus_#_aureus_!_subsp._{_aureus_}_USA300_TCH1516_chromosome_complete_genome|gi|161508266|ref|NC_010079.1|	6.793	93.207	195165	2677750	2872915
Staphylococcus_#_aureus_!_subsp._{_aureus_}_NCTC_8325_chromosome_complete_genome|gi|88193823|ref|NC_007795.1|	6.8	93.2	191840	2629521	2821361
Staphylococcus_#_aureus_!_subsp._{_aureus_}_COL_chromosome_complete_genome|gi|57650036|ref|NC_002951.2|	6.772	93.228	190265	2619157	2809422
Staphylococcus_#_aureus_!_subsp._{_aureus_}_VC40_chromosome_complete_genome|gi|379013365|ref|NC_016912.1|	6.971	93.029	187708	2504862	2692570
Staphylococcus_#_aureus_!_M1_{_complete_}_genome|gi|479328021|ref|NC_021059.1|	6.496	93.504	186045	2678080	2864125
Staphylococcus_#_aureus_!_Bmb9393_{_complete_}_genome|gi|521210823|ref|NC_021670.1|	6.178	93.822	184142	2796406	2980548
Staphylococcus_#_aureus_!_subsp._{_aureus_}_JH9_chromosome_complete_genome|gi|148266447|ref|NC_009487.1|	6.247	93.753	181592	2725108	2906700
Staphylococcus_#_aureus_!_subsp._{_aureus_}_MW2_complete_genome|gi|21281729|ref|NC_003923.1|	6.41	93.59	180778	2639684	2820462
Staphylococcus_#_aureus_!_subsp._{_aureus_}_11819-97_chromosome_complete_genome|gi|385780298|ref|NC_017351.1|	6.286	93.714	178930	2667616	2846546
Staphylococcus_#_aureus_!_subsp._{_aureus_}_TW20_complete_genome|gi|387141638|ref|NC_017331.1|	5.862	94.138	178407	2864803	3043210
Staphylococcus_#_aureus_!_subsp._{_aureus_}_N315_chromosome_complete_genome|gi|29165615|ref|NC_002745.2|	6.301	93.699	177358	2637458	2814816
Staphylococcus_#_aureus_!_M0235_{_genomic_}_scaffold_acumc-supercont1.1_whole_genome_shotgun_sequence|gi|487361831|ref|NZ_KB821130.1|	6.24	93.76	176420	2650656	2827076
Staphylococcus_#_aureus_!_subsp._{_aureus_}_ST228_complete_genome_isolate_10388|gi|470190315|ref|NC_020529.1|	6.387	93.613	176248	2583262	2759510
Staphylococcus_#_aureus_!_subsp._{_aureus_}_ST228_complete_genome_isolate_10497|gi|470217946|ref|NC_020564.1|	6.387	93.613	176248	2583264	2759512
Staphylococcus_#_aureus_!_subsp._{_aureus_}_ST228_complete_genome_isolate_16035|gi|470194245|ref|NC_020533.1|	6.382	93.618	176131	2583704	2759835
Staphylococcus_#_aureus_!_subsp._{_aureus_}_ST228_complete_genome_isolate_18341|gi|470196211|ref|NC_020536.1|	6.383	93.617	176131	2583342	2759473
Staphylococcus_#_aureus_!_subsp._{_aureus_}_ST228_complete_genome_isolate_18583|gi|470223734|ref|NC_020568.1|	6.38	93.62	176054	2583274	2759328
Staphylococcus_#_aureus_!_subsp._{_aureus_}_ST228_complete_genome_isolate_15532|gi|470192280|ref|NC_020532.1|	6.378	93.622	176031	2583852	2759883
Staphylococcus_#_aureus_!_subsp._{_aureus_}_ST228_complete_genome_isolate_16125|gi|470221770|ref|NC_020566.1|	6.379	93.621	176031	2583426	2759457
Staphylococcus_#_aureus_!_subsp._{_aureus_}_ST228_complete_genome_isolate_18412|gi|470198176|ref|NC_020537.1|	6.38	93.62	176031	2583232	2759263
Staphylococcus_#_aureus_!_subsp._{_aureus_}_ED98_complete_genome|gi|269201690|ref|NC_013450.1|	6.216	93.784	175552	2648852	2824404
Staphylococcus_#_aureus_!_subsp._{_aureus_}_MSSA476_chromosome_complete_genome|gi|49484912|ref|NC_002953.3|	6.259	93.741	175234	2624568	2799802
Staphylococcus_#_aureus_!_subsp._{_aureus_}_str._JKD6008_chromosome_complete_genome|gi|384860682|ref|NC_017341.1|	5.992	94.008	175224	2749120	2924344
Staphylococcus_#_aureus_!_subsp._{_aureus_}_T0131_chromosome_complete_genome|gi|384868588|ref|NC_017347.1|	6.008	93.992	175067	2738833	2913900
Staphylococcus_#_aureus_!_M1216_{_genomic_}_scaffold_acumJ-supercont-complete_whole_genome_shotgun_sequence|gi|493203888|ref|NZ_KB822075.1|	5.998	94.002	167544	2625831	2793375
Staphylococcus_#_aureus_!_subsp._{_aureus_}_JH1_chromosome_complete_genome|gi|150392480|ref|NC_009632.1|	5.547	94.453	161221	2745286	2906507
Staphylococcus_#_aureus_!_04-02981_{_chromosome_}_complete_genome|gi|387149188|ref|NC_017340.1|	5.652	94.348	159473	2661979	2821452
Staphylococcus_#_aureus_!_subsp._{_aureus_}_Mu50_chromosome_complete_genome|gi|57634611|ref|NC_002758.2|	5.531	94.469	159205	2719324	2878529
Staphylococcus_#_aureus_!_subsp._{_aureus_}_ECT-R_2_complete_genome|gi|384863396|ref|NC_017343.1|	5.821	94.179	158885	2570655	2729540
Staphylococcus_#_aureus_!_subsp._{_aureus_}_Mu3_complete_genome|gi|156978331|ref|NC_009782.1|	5.503	94.497	158505	2721663	2880168
Staphylococcus_#_aureus_!_08BA02176_{_chromosome_}_complete_genome|gi|404477334|ref|NC_018608.1|	5.593	94.407	155615	2626698	2782313
Staphylococcus_#_aureus_!_CA-347_{_complete_}_genome|gi|514064966|ref|NC_021554.1|	5.421	94.579	154514	2695989	2850503
Staphylococcus_#_aureus_!_subsp._{_aureus_}_HO_5096_0412_complete_genome|gi|386829725|ref|NC_017763.1|	5.026	94.974	142344	2689955	2832299
Staphylococcus_#_aureus_!_subsp._{_aureus_}_MRSA252_chromosome_complete_genome|gi|49482253|ref|NC_002952.2|	4.481	95.519	130068	2772551	2902619
Staphylococcus_#_aureus_!_subsp._{_aureus_}_LGA251_complete_genome|gi|387779217|ref|NC_017349.1|	4.587	95.413	126190	2624644	2750834
Staphylococcus_#_aureus_!_subsp._{_aureus_}_M013_chromosome_complete_genome|gi|379019812|ref|NC_016928.1|	4.439	95.561	123776	2664860	2788636
Staphylococcus_#_aureus_!_subsp._{_aureus_}_ED133_chromosome_complete_genome|gi|384546269|ref|NC_017337.1|	4.348	95.652	123169	2709309	2832478
Staphylococcus_#_aureus_!_subsp._{_aureus_}_ST398_complete_genome|gi|387601291|ref|NC_017333.1|	4.173	95.827	119870	2752712	2872582
Staphylococcus_#_aureus_!_subsp._{_aureus_}_71193_chromosome_complete_genome|gi|386727822|ref|NC_017673.1|	4.359	95.641	118354	2596646	2715000
Staphylococcus_#_aureus_!_subsp._{_aureus_}_JKD6159_chromosome_complete_genome|gi|384548923|ref|NC_017338.1|	4.206	95.794	118238	2693197	2811435
Staphylococcus_#_aureus_!_subsp._{_aureus_}_TCH60_chromosome_complete_genome|gi|384865886|ref|NC_017342.1|	4.123	95.877	115547	2687128	2802675
Staphylococcus_#_aureus_!_RF122_{_complete_}_genome|gi|82749777|ref|NC_007622.1|	4.192	95.808	114973	2627558	2742531
Staphylococcus_#_aureus_!_M0580_{_genomic_}_scaffold_acvrg-supercont1.2_whole_genome_shotgun_sequence|gi|486357261|ref|NZ_KB821487.1|	6.126	93.874	90132	1381051	1471183
Staphylococcus_#_aureus_!_M0326_{_genomic_}_scaffold_acrHf-supercont1.2_whole_genome_shotgun_sequence|gi|486268272|ref|NZ_KB821203.1|	6.266	93.734	76784	1148555	1225339
Staphylococcus_#_aureus_!_M1373_{_genomic_}_scaffold_acumD-supercont1.4_whole_genome_shotgun_sequence|gi|488719292|ref|NZ_KB822213.1|	6.156	93.844	74546	1136364	1210910
Staphylococcus_#_aureus_!_M0450_{_genomic_}_scaffold_acqwq-supercont1.3_whole_genome_shotgun_sequence|gi|486302842|ref|NZ_KB821345.1|	6.565	93.435	73580	1047283	1120863
Staphylococcus_#_aureus_!_M1188_{_genomic_}_scaffold_acumb-supercont1.2_whole_genome_shotgun_sequence|gi|493196425|ref|NZ_KB822058.1|	5.919	94.081	71980	1144077	1216057
Staphylococcus_#_aureus_!_M1188_{_genomic_}_scaffold_acumb-supercont1.4_whole_genome_shotgun_sequence|gi|493198238|ref|NZ_KB822060.1|	5.818	94.182	71656	1160063	1231719
Staphylococcus_#_aureus_!_M0173_{_genomic_}_scaffold_acrHj-supercont1.2_whole_genome_shotgun_sequence|gi|486253586|ref|NZ_KB821071.1|	6.286	93.714	66866	996801	1063667
Staphylococcus_#_aureus_!_M0998_{_genomic_}_scaffold_acvqv-supercont1.6_whole_genome_shotgun_sequence|gi|486398674|ref|NZ_KB821818.1|	6.047	93.953	65150	1012183	1077333
Staphylococcus_#_aureus_!_M0823_{_genomic_}_scaffold_acvqk-supercont1.8_whole_genome_shotgun_sequence|gi|486383952|ref|NZ_KB821698.1|	6.828	93.172	61305	836512	897817
Staphylococcus_#_aureus_!_M0769_{_genomic_}_scaffold_acvqF-supercont1.7_whole_genome_shotgun_sequence|gi|480448432|ref|NZ_KB821635.1|	6.59	93.41	60520	857854	918374
Staphylococcus_#_aureus_!_M0695_{_genomic_}_scaffold_acunx-supercont1.4_whole_genome_shotgun_sequence|gi|489045023|ref|NZ_KB821609.1|	6.134	93.866	56465	864100	920565
Staphylococcus_#_aureus_!_HI010_{_genomic_}_scaffold_acqxi-supercont1.1_whole_genome_shotgun_sequence|gi|486203361|ref|NZ_KB820894.1|	1.921	98.079	55176	2817186	2872362
Staphylococcus_#_aureus_!_M1286_{_genomic_}_scaffold_acuob-supercont1.10_whole_genome_shotgun_sequence|gi|487397932|ref|NZ_KB822142.1|	6.907	93.093	54586	735718	790304
Staphylococcus_#_aureus_!_HI049B_{_genomic_}_scaffold_acqxg-supercont1.1_whole_genome_shotgun_sequence|gi|486205205|ref|NZ_KB820906.1|	1.868	98.132	53974	2835552	2889526
Staphylococcus_#_aureus_!_M0695_{_genomic_}_scaffold_acunx-supercont1.18_whole_genome_shotgun_sequence|gi|489044982|ref|NZ_KB821605.1|	6.716	93.284	53636	744945	798581
Staphylococcus_#_aureus_!_HI049C_{_genomic_}_scaffold_acqxH-supercont1.1_whole_genome_shotgun_sequence|gi|486211608|ref|NZ_KB820909.1|	1.854	98.146	53575	2835795	2889370
Staphylococcus_#_aureus_!_HI111_{_genomic_}_scaffold_acqwe-supercont1.1_whole_genome_shotgun_sequence|gi|486214133|ref|NZ_KB820916.1|	1.869	98.131	52936	2779590	2832526
Staphylococcus_#_aureus_!_HI022_{_genomic_}_scaffold_acqwY-supercont1.1_whole_genome_shotgun_sequence|gi|486209995|ref|NZ_KB820903.1|	1.86	98.14	52424	2766445	2818869
Staphylococcus_#_aureus_!_M0531_{_genomic_}_scaffold_acvqQ-supercont1.1_whole_genome_shotgun_sequence|gi|486342614|ref|NZ_KB821438.1|	1.843	98.157	52375	2788899	2841274
Staphylococcus_#_aureus_!_M0312_{_genomic_}_scaffold_acqxO-supercont1.1_whole_genome_shotgun_sequence|gi|487376936|ref|NZ_KB821215.1|	1.765	98.235	51960	2891775	2943735
Staphylococcus_#_aureus_!_M0221_{_genomic_}_scaffold_acqxa-supercont1.2_whole_genome_shotgun_sequence|gi|486259720|ref|NZ_KB821124.1|	1.798	98.202	51641	2820478	2872119
Staphylococcus_#_aureus_!_M0468_{_genomic_}_scaffold_acqxk-supercont1.2_whole_genome_shotgun_sequence|gi|486310012|ref|NZ_KB821359.1|	1.75	98.25	51537	2892643	2944180
Staphylococcus_#_aureus_!_M0831_{_genomic_}_scaffold_acumY-supercont-complete_whole_genome_shotgun_sequence|gi|487384247|ref|NZ_KB821688.1|	1.73	98.27	51166	2906615	2957781
Staphylococcus_#_aureus_!_M0055_{_genomic_}_scaffold_acumI-supercont1.1_whole_genome_shotgun_sequence|gi|487290252|ref|NZ_KB820976.1|	1.736	98.264	50798	2876041	2926839
Staphylococcus_#_aureus_!_HIF003_B2N-C_{_genomic_}_scaffold_acqxV-supercont1.1_whole_genome_shotgun_sequence|gi|486209139|ref|NZ_KB820925.1|	1.806	98.194	49765	2705231	2754996
Staphylococcus_#_aureus_!_M0340_{_genomic_}_scaffold_acqxN-supercont1.2_whole_genome_shotgun_sequence|gi|486280931|ref|NZ_KB821242.1|	1.801	98.199	49221	2683716	2732937
Staphylococcus_#_aureus_!_subsp._{_aureus_}_55/2053_genomic_scaffold_supercont1.1_whole_genome_shotgun_sequence|gi|257423656|ref|NZ_GG700533.1|	4.329	95.671	44448	982378	1026826
Staphylococcus_#_aureus_!_subsp._{_aureus_}_ATCC_BAA-39_genomic_scaffold_SCAFFOLD1_whole_genome_shotgun_sequence|gi|305431397|ref|NZ_GL397103.1|	1.454	98.546	42172	2857940	2900112
Staphylococcus_#_aureus_!_M1462_{_genomic_}_scaffold_acumH-supercont1.3_whole_genome_shotgun_sequence|gi|487135576|ref|NZ_KB822552.1|	1.741	98.259	41994	2369571	2411565
Staphylococcus_#_aureus_!_M0695_{_genomic_}_scaffold_acunx-supercont1.5_whole_genome_shotgun_sequence|gi|489045039|ref|NZ_KB821610.1|	6.591	93.409	37714	534531	572245
Staphylococcus_#_aureus_!_M1015_{_genomic_}_scaffold_acvqH-supercont1.4_whole_genome_shotgun_sequence|gi|486404434|ref|NZ_KB821837.1|	5.824	94.176	34546	558654	593200
Staphylococcus_#_aureus_!_M0602_{_genomic_}_scaffold_acvqp-supercont1.2_whole_genome_shotgun_sequence|gi|486358344|ref|NZ_KB821494.1|	5.899	94.101	33357	532101	565458
Staphylococcus_#_aureus_!_HI168_{_genomic_}_scaffold_acqxp-supercont1.3_whole_genome_shotgun_sequence|gi|486213000|ref|NZ_KB820921.1|	1.805	98.195	31822	1731237	1763059
Staphylococcus_#_aureus_!_HI049_{_genomic_}_scaffold_acqxW-supercont1.1_whole_genome_shotgun_sequence|gi|486200690|ref|NZ_KB820912.1|	1.835	98.165	31821	1702457	1734278
Staphylococcus_#_aureus_!_HI013_{_genomic_}_scaffold_acqwl-supercont1.2_whole_genome_shotgun_sequence|gi|486215615|ref|NZ_KB820899.1|	1.804	98.196	30032	1634891	1664923
Staphylococcus_#_aureus_!_subsp._{_aureus_}_TCH70_genomic_scaffold_SCAFFOLD1_whole_genome_shotgun_sequence|gi|311744845|ref|NZ_GL538356.1|	1.056	98.944	29424	2757154	2786578
Staphylococcus_#_aureus_!_M1223_{_genomic_}_scaffold_acune-supercont1.3_whole_genome_shotgun_sequence|gi|487396419|ref|NZ_KB822073.1|	1.753	98.247	29216	1637385	1666601
Staphylococcus_#_aureus_!_M1007_{_genomic_}_scaffold_acvqZ-supercont1.3_whole_genome_shotgun_sequence|gi|486401503|ref|NZ_KB821831.1|	1.714	98.286	28717	1646723	1675440
Staphylococcus_#_aureus_!_M0633_{_genomic_}_scaffold_acyCm-supercont1.2_whole_genome_shotgun_sequence|gi|487371925|ref|NZ_KB821508.1|	1.845	98.155	27495	1462829	1490324
Staphylococcus_#_aureus_!_M0424_{_genomic_}_scaffold_acunn-supercont1.3_whole_genome_shotgun_sequence|gi|487368144|ref|NZ_KB821339.1|	1.773	98.227	26647	1476394	1503041
Staphylococcus_#_aureus_!_M0177_{_genomic_}_scaffold_acumi-supercont1.1_whole_genome_shotgun_sequence|gi|487359982|ref|NZ_KB821078.1|	6.092	93.908	26583	409808	436391
Staphylococcus_#_aureus_!_M1064_{_genomic_}_scaffold_acumU-supercont1.6_whole_genome_shotgun_sequence|gi|486420802|ref|NZ_KB821942.1|	1.764	98.236	26418	1471349	1497767
Staphylococcus_#_aureus_!_M1188_{_genomic_}_scaffold_acumb-supercont1.3_whole_genome_shotgun_sequence|gi|493196995|ref|NZ_KB822059.1|	6.209	93.791	25432	384145	409577
Staphylococcus_#_aureus_!_HI013_{_genomic_}_scaffold_acqwl-supercont1.1_whole_genome_shotgun_sequence|gi|486215046|ref|NZ_KB820898.1|	1.992	98.008	22653	1114708	1137361
Staphylococcus_#_aureus_!_M0239_{_genomic_}_scaffold_acqxh-supercont1.1_whole_genome_shotgun_sequence|gi|486264624|ref|NZ_KB821128.1|	0.828	99.172	22567	2703994	2726561
Staphylococcus_#_aureus_!_HI049_{_genomic_}_scaffold_acqxW-supercont1.2_whole_genome_shotgun_sequence|gi|486202079|ref|NZ_KB820913.1|	1.983	98.017	22551	1114848	1137399
Staphylococcus_#_aureus_!_M0328_{_genomic_}_scaffold_acrGR-supercont1.1_whole_genome_shotgun_sequence|gi|486271607|ref|NZ_KB821211.1|	6.331	93.669	22467	332385	354852
Staphylococcus_#_aureus_!_HI168_{_genomic_}_scaffold_acqxp-supercont1.1_whole_genome_shotgun_sequence|gi|486212462|ref|NZ_KB820919.1|	1.991	98.009	21814	1073824	1095638
Staphylococcus_#_aureus_!_M1223_{_genomic_}_scaffold_acune-supercont1.1_whole_genome_shotgun_sequence|gi|487396341|ref|NZ_KB822071.1|	1.771	98.229	20715	1148722	1169437
Staphylococcus_#_aureus_!_M1007_{_genomic_}_scaffold_acvqZ-supercont1.1_whole_genome_shotgun_sequence|gi|486400527|ref|NZ_KB821829.1|	1.811	98.189	20115	1090779	1110894
Staphylococcus_#_aureus_!_M0424_{_genomic_}_scaffold_acunn-supercont1.1_whole_genome_shotgun_sequence|gi|487367914|ref|NZ_KB821337.1|	1.79	98.21	19991	1097014	1117005
Staphylococcus_#_aureus_!_subsp._{_aureus_}_MN8_chromosome_whole_genome_shotgun_sequence|gi|298527634|ref|NZ_CM000952.1|	0.638	99.362	18491	2881097	2899588
Staphylococcus_#_aureus_!_subsp._{_aureus_}_MSHR1132_complete_genome|gi|379794527|ref|NC_016941.1|	0.651	99.349	17975	2744810	2762785
Staphylococcus_#_aureus_!_M1373_{_genomic_}_scaffold_acumD-supercont1.7_whole_genome_shotgun_sequence|gi|488719319|ref|NZ_KB822216.1|	5.945	94.055	17832	282116	299948
Staphylococcus_#_aureus_!_M0513_{_genomic_}_scaffold_acumP-supercont-complete_whole_genome_shotgun_sequence|gi|487369849|ref|NZ_KB821413.1|	0.6	99.4	17591	2915259	2932850
Staphylococcus_#_aureus_!_M1064_{_genomic_}_scaffold_acumU-supercont1.1_whole_genome_shotgun_sequence|gi|486419252|ref|NZ_KB821934.1|	1.887	98.113	17011	884355	901366
Staphylococcus_#_aureus_!_subsp._{_aureus_}_M809_genomic_scaffold_supercont1.8_whole_genome_shotgun_sequence|gi|293509340|ref|NZ_GG749306.1|	4.166	95.834	16682	383744	400426
Staphylococcus_#_aureus_!_M0396_{_genomic_}_scaffold_acunf-supercont1.4_whole_genome_shotgun_sequence|gi|487367492|ref|NZ_KB821299.1|	1.023	98.977	16283	1575988	1592271
Staphylococcus_#_aureus_!_M0695_{_genomic_}_scaffold_acunx-supercont1.1_whole_genome_shotgun_sequence|gi|489044929|ref|NZ_KB821596.1|	5.086	94.914	16095	300373	316468
Staphylococcus_#_aureus_!_subsp._{_aureus_}_LCT-SA112_Scaffold1_whole_genome_shotgun_sequence|gi|452721112|ref|NZ_JH691956.1|	0.556	99.444	15351	2744080	2759431
Staphylococcus_#_aureus_!_subsp._{_aureus_}_ATCC_51811_genomic_scaffold_SCAFFOLD1_whole_genome_shotgun_sequence|gi|297210119|ref|NZ_GG774480.1|	1.062	98.938	14872	1385433	1400305
Staphylococcus_#_aureus_!_M1228_{_genomic_}_scaffold_acunW-supercont1.2_whole_genome_shotgun_sequence|gi|487401372|ref|NZ_KB822377.1|	0.855	99.145	13406	1554605	1568011
Staphylococcus_#_aureus_!_M1373_{_genomic_}_scaffold_acumD-supercont1.5_whole_genome_shotgun_sequence|gi|488719293|ref|NZ_KB822214.1|	5.849	94.151	13181	212156	225337
Staphylococcus_#_aureus_!_subsp._{_aureus_}_USA300_TCH959_genomic_scaffold_SCAFFOLD1_whole_genome_shotgun_sequence|gi|255926317|ref|NZ_GG697985.1|	0.869	99.131	12152	1386634	1398786
Staphylococcus_#_aureus_!_M0633_{_genomic_}_scaffold_acyCm-supercont1.4_whole_genome_shotgun_sequence|gi|487372090|ref|NZ_KB821510.1|	1.852	98.148	12032	637657	649689
Staphylococcus_#_aureus_!_M1255_{_genomic_}_scaffold_acunA-supercont1.5_whole_genome_shotgun_sequence|gi|486688395|ref|NZ_KB822120.1|	6.499	93.501	11358	163411	174769
Staphylococcus_#_aureus_!_subsp._{_aureus_}_ATCC_51811_genomic_scaffold_SCAFFOLD2_whole_genome_shotgun_sequence|gi|297210120|ref|NZ_GG774481.1|	0.933	99.067	10652	1131559	1142211
Staphylococcus_#_aureus_!_M1309_{_genomic_}_scaffold_acunC-supercont1.6_whole_genome_shotgun_sequence|gi|487398463|ref|NZ_KB822161.1|	8.236	91.764	9716	108258	117974
Staphylococcus_#_aureus_!_M1462_{_genomic_}_scaffold_acumH-supercont1.1_whole_genome_shotgun_sequence|gi|487135346|ref|NZ_KB822550.1|	1.804	98.196	9144	497794	506938
Staphylococcus_#_aureus_!_M0633_{_genomic_}_scaffold_acyCm-supercont1.1_whole_genome_shotgun_sequence|gi|487371765|ref|NZ_KB821507.1|	1.706	98.294	9121	525399	534520
Staphylococcus_#_aureus_!_M1256_{_genomic_}_scaffold_acunO-supercont1.2_whole_genome_shotgun_sequence|gi|487397459|ref|NZ_KB822115.1|	0.6	99.4	8570	1420658	1429228
Staphylococcus_#_aureus_!_M1228_{_genomic_}_scaffold_acunW-supercont1.1_whole_genome_shotgun_sequence|gi|487401221|ref|NZ_KB822376.1|	0.68	99.32	8383	1223644	1232027
Staphylococcus_#_aureus_!_subsp._{_aureus_}_USA300_TCH959_genomic_scaffold_SCAFFOLD2_whole_genome_shotgun_sequence|gi|255926318|ref|NZ_GG697986.1|	0.819	99.181	8342	1009905	1018247
Staphylococcus_#_aureus_!_subsp._{_aureus_}_MRSA131_genomic_scaffold_Scfld83_whole_genome_shotgun_sequence|gi|422745409|ref|NZ_GL638175.1|	1.663	98.337	8124	480253	488377
Staphylococcus_#_aureus_!_M0396_{_genomic_}_scaffold_acunf-supercont1.2_whole_genome_shotgun_sequence|gi|487367086|ref|NZ_KB821297.1|	1.04	98.96	7703	733164	740867
Staphylococcus_#_aureus_!_subsp._{_aureus_}_E1410_genomic_scaffold_supercont1.7_whole_genome_shotgun_sequence|gi|257433049|ref|NZ_GG700603.1|	0.744	99.256	7404	987479	994883
Staphylococcus_#_aureus_!_subsp._{_aureus_}_H19_genomic_scaffold_supercont1.8_whole_genome_shotgun_sequence|gi|283769672|ref|NZ_GG730342.1|	0.534	99.466	7402	1378933	1386335
Staphylococcus_#_aureus_!_M0408_{_genomic_}_scaffold_acrHk-supercont1.4_whole_genome_shotgun_sequence|gi|486296790|ref|NZ_KB821329.1|	0.662	99.338	7369	1105135	1112504
Staphylococcus_#_aureus_!_subsp._{_aureus_}_MRSA131_genomic_scaffold_Scfld122_whole_genome_shotgun_sequence|gi|422746016|ref|NZ_GL638181.1|	2.114	97.886	7305	338214	345519
Staphylococcus_#_aureus_!_subsp._{_aureus_}_Btn1260_genomic_scaffold_supercont1.7_whole_genome_shotgun_sequence|gi|282905315|ref|NZ_GG730262.1|	0.714	99.286	7270	1011017	1018287
Staphylococcus_#_aureus_!_M0695_{_genomic_}_scaffold_acunx-supercont1.2_whole_genome_shotgun_sequence|gi|489044993|ref|NZ_KB821607.1|	4.246	95.754	6984	157509	164493
Staphylococcus_#_aureus_!_subsp._{_aureus_}_TCH130_genomic_scaffold_SCAFFOLD1_whole_genome_shotgun_sequence|gi|255925763|ref|NZ_GG698158.1|	1.007	98.993	6950	683472	690422
Staphylococcus_#_aureus_!_M0877_{_genomic_}_scaffold_acumt-supercont1.5_whole_genome_shotgun_sequence|gi|487385357|ref|NZ_KB821718.1|	0.497	99.503	6902	1382659	1389561
Staphylococcus_#_warneri_!_SG1_{_complete_}_genome|gi|445058371|ref|NC_020164.1|	0.273	99.727	6797	2479245	2486042
Staphylococcus_#_aureus_!_subsp._{_aureus_}_C427_genomic_scaffold_supercont1.8_whole_genome_shotgun_sequence|gi|282918694|ref|NZ_GG730148.1|	0.659	99.341	6570	990540	997110
Staphylococcus_#_aureus_!_M1034_{_genomic_}_scaffold_acumn-supercont1.7_whole_genome_shotgun_sequence|gi|487391726|ref|NZ_KB821858.1|	0.748	99.252	6568	871771	878339
Staphylococcus_#_aureus_!_subsp._{_aureus_}_58-424_genomic_scaffold_supercont1.6_whole_genome_shotgun_sequence|gi|293500395|ref|NZ_GG749059.1|	0.646	99.354	6502	1000573	1007075
Staphylococcus_#_aureus_!_M0326_{_genomic_}_scaffold_acrHf-supercont1.7_whole_genome_shotgun_sequence|gi|486269445|ref|NZ_KB821208.1|	7.155	92.845	6498	84322	90820
Staphylococcus_#_aureus_!_M1256_{_genomic_}_scaffold_acunO-supercont1.1_whole_genome_shotgun_sequence|gi|487397331|ref|NZ_KB822114.1|	0.467	99.533	6420	1367476	1373896
Staphylococcus_#_aureus_!_subsp._{_aureus_}_C160_genomic_scaffold_supercont1.7_whole_genome_shotgun_sequence|gi|282903541|ref|NZ_GG730279.1|	0.653	99.347	6370	968590	974960
Staphylococcus_#_aureus_!_subsp._{_aureus_}_65-1322_genomic_scaffold_supercont1.6_whole_genome_shotgun_sequence|gi|257427710|ref|NZ_GG700564.1|	0.627	99.373	6303	998584	1004887
Staphylococcus_#_aureus_!_M1311_{_genomic_}_scaffold_aculZ-supercont1.3_whole_genome_shotgun_sequence|gi|486835574|ref|NZ_KB822177.1|	0.487	99.513	6295	1287617	1293912
Staphylococcus_#_aureus_!_subsp._{_aureus_}_EMRSA16_genomic_scaffold_supercont1.10_whole_genome_shotgun_sequence|gi|295427484|ref|NZ_GG770522.1|	0.796	99.204	6269	781088	787357
Staphylococcus_#_aureus_!_M0946_{_genomic_}_scaffold_acunJ-supercont1.6_whole_genome_shotgun_sequence|gi|487388144|ref|NZ_KB821791.1|	0.775	99.225	6169	790177	796346
Staphylococcus_#_aureus_!_subsp._{_aureus_}_TCH130_genomic_scaffold_SCAFFOLD2_whole_genome_shotgun_sequence|gi|255925764|ref|NZ_GG698159.1|	0.946	99.054	6005	628763	634768
Staphylococcus_#_aureus_!_subsp._{_aureus_}_MRSA131_genomic_scaffold_Scfld545_whole_genome_shotgun_sequence|gi|422747480|ref|NZ_GL638198.1|	2.026	97.974	5974	288918	294892
Staphylococcus_#_aureus_!_subsp._{_aureus_}_A017934/97_genomic_scaffold_supercont1.9_whole_genome_shotgun_sequence|gi|283957738|ref|NZ_GG731503.1|	0.612	99.388	5970	969042	975012
Staphylococcus_#_aureus_!_M0408_{_genomic_}_scaffold_acrHk-supercont1.1_whole_genome_shotgun_sequence|gi|486293955|ref|NZ_KB821326.1|	0.482	99.518	5822	1201901	1207723
Staphylococcus_#_aureus_!_subsp._{_aureus_}_H19_genomic_scaffold_supercont1.2_whole_genome_shotgun_sequence|gi|283767263|ref|NZ_GG730336.1|	0.559	99.441	5697	1014254	1019951
Staphylococcus_#_pseudintermedius_!_HKU10-03_{_chromosome_}_complete_genome|gi|319891290|ref|NC_014925.1|	0.212	99.788	5557	2611824	2617381
Staphylococcus_#_aureus_!_subsp._{_aureus_}_E1410_genomic_scaffold_supercont1.2_whole_genome_shotgun_sequence|gi|257431621|ref|NZ_GG700598.1|	0.514	99.486	5431	1052195	1057626
Staphylococcus_#_aureus_!_M1034_{_genomic_}_scaffold_acumn-supercont1.1_whole_genome_shotgun_sequence|gi|487391239|ref|NZ_KB821848.1|	0.537	99.463	5418	1003818	1009236
Staphylococcus_#_aureus_!_subsp._{_aureus_}_MRSA177_genomic_scaffold_Scfld582_whole_genome_shotgun_sequence|gi|422744652|ref|NZ_GL638246.1|	1.723	98.277	5375	306575	311950
Staphylococcus_#_aureus_!_M0877_{_genomic_}_scaffold_acumt-supercont1.2_whole_genome_shotgun_sequence|gi|487385040|ref|NZ_KB821715.1|	0.496	99.504	5305	1063377	1068682
Staphylococcus_#_aureus_!_M1373_{_genomic_}_scaffold_acumD-supercont1.6_whole_genome_shotgun_sequence|gi|488719299|ref|NZ_KB822215.1|	6.547	93.453	5065	72293	77358
Staphylococcus_#_aureus_!_subsp._{_aureus_}_65-1322_genomic_scaffold_supercont1.2_whole_genome_shotgun_sequence|gi|257426332|ref|NZ_GG700560.1|	0.493	99.507	5031	1015313	1020344
Staphylococcus_#_aureus_!_subsp._{_aureus_}_MRSA131_genomic_scaffold_Scfld482_whole_genome_shotgun_sequence|gi|422747280|ref|NZ_GL638197.1|	2.587	97.413	5004	188388	193392
Staphylococcus_#_aureus_!_subsp._{_aureus_}_A017934/97_genomic_scaffold_supercont1.19_whole_genome_shotgun_sequence|gi|283958999|ref|NZ_GG731513.1|	0.487	99.513	4831	987610	992441
Staphylococcus_#_aureus_!_subsp._{_aureus_}_Btn1260_genomic_scaffold_supercont1.14_whole_genome_shotgun_sequence|gi|282906513|ref|NZ_GG730269.1|	0.47	99.53	4831	1023348	1028179
Staphylococcus_#_aureus_!_subsp._{_aureus_}_M1015_genomic_scaffold_supercont1.19_whole_genome_shotgun_sequence|gi|293549604|ref|NZ_GG749014.1|	0.475	99.525	4831	1011812	1016643
Staphylococcus_#_pseudintermedius_!_ED99_{_chromosome_}_complete_genome|gi|386318029|ref|NC_017568.1|	0.187	99.813	4798	2567418	2572216
Staphylococcus_#_aureus_!_subsp._{_aureus_}_M876_genomic_scaffold_supercont1.2_whole_genome_shotgun_sequence|gi|257434580|ref|NZ_GG700615.1|	0.466	99.534	4731	1010509	1015240
Staphylococcus_#_aureus_!_subsp._{_aureus_}_MRSA177_genomic_scaffold_Scfld173_whole_genome_shotgun_sequence|gi|422743415|ref|NZ_GL638224.1|	1.51	98.49	4723	308148	312871
Staphylococcus_#_aureus_!_subsp._{_aureus_}_MRSA131_genomic_scaffold_Scfld179_whole_genome_shotgun_sequence|gi|422746581|ref|NZ_GL638183.1|	1.83	98.17	4675	250804	255479
Staphylococcus_#_aureus_!_subsp._{_aureus_}_58-424_genomic_scaffold_supercont1.3_whole_genome_shotgun_sequence|gi|293497427|ref|NZ_GG749056.1|	0.452	99.548	4631	1020575	1025206
Staphylococcus_#_aureus_!_subsp._{_aureus_}_68-397_genomic_scaffold_supercont1.1_whole_genome_shotgun_sequence|gi|257428975|ref|NZ_GG700574.1|	0.457	99.543	4631	1009009	1013640
Staphylococcus_#_aureus_!_subsp._{_aureus_}_C160_genomic_scaffold_supercont1.2_whole_genome_shotgun_sequence|gi|282902071|ref|NZ_GG730274.1|	0.445	99.555	4631	1037193	1041824
Staphylococcus_#_aureus_!_subsp._{_aureus_}_WBG10049_genomic_scaffold_supercont1.11_whole_genome_shotgun_sequence|gi|282911740|ref|NZ_GG730218.1|	0.446	99.554	4630	1033658	1038288
Staphylococcus_#_aureus_!_M1064_{_genomic_}_scaffold_acumU-supercont1.3_whole_genome_shotgun_sequence|gi|486419946|ref|NZ_KB821939.1|	1.968	98.032	4543	226322	230865
Staphylococcus_#_aureus_!_subsp._{_aureus_}_TCH130_genomic_scaffold_SCAFFOLD3_whole_genome_shotgun_sequence|gi|255925765|ref|NZ_GG698160.1|	1.054	98.946	4408	413800	418208
Bacillus_#_megaterium_!_DSM_{_319_}_chromosome_complete_genome|gi|295702242|ref|NC_014103.1|	0.086	99.914	4400	5093047	5097447
Bacillus_#_megaterium_!_QM_{_B1551_}_chromosome_complete_genome|gi|294496875|ref|NC_014019.1|	0.086	99.914	4400	5092729	5097129
Staphylococcus_#_aureus_!_subsp._{_aureus_}_C427_genomic_scaffold_supercont1.18_whole_genome_shotgun_sequence|gi|282920745|ref|NZ_GG730158.1|	0.426	99.574	4231	989423	993654
Bacillus_#_cereus_!_AH187_{_chromosome_}_complete_genome|gi|217957581|ref|NC_011658.1|	0.08	99.92	4200	5264830	5269030
Bacillus_#_cereus_!_B4264_{_chromosome_}_complete_genome|gi|218230750|ref|NC_011725.1|	0.078	99.922	4200	5414836	5419036
Bacillus_#_thuringiensis_!_BMB171_{_chromosome_}_complete_genome|gi|296500838|ref|NC_014171.1|	0.079	99.921	4200	5325888	5330088
Bacillus_#_thuringiensis_!_Bt407_{_chromosome_}_complete_genome|gi|409187965|ref|NC_018877.1|	0.076	99.924	4200	5496301	5500501
Bacillus_#_thuringiensis_!_HD-789_{_complete_}_genome|gi|434373506|ref|NC_018508.1|	0.076	99.924	4200	5491078	5495278
Bacillus_#_thuringiensis_!_MC28_{_chromosome_}_complete_genome|gi|407703236|ref|NC_018693.1|	0.078	99.922	4200	5410294	5414494
Bacillus_#_weihenstephanensis_!_KBAB4_{_chromosome_}_complete_genome|gi|163938013|ref|NC_010184.1|	0.08	99.92	4200	5258575	5262775
Staphylococcus_#_aureus_!_subsp._{_aureus_}_68-397_genomic_scaffold_supercont1.6_whole_genome_shotgun_sequence|gi|257430345|ref|NZ_GG700579.1|	0.708	99.292	4102	575520	579622
Staphylococcus_#_aureus_!_subsp._{_aureus_}_M899_genomic_scaffold_supercont1.7_whole_genome_shotgun_sequence|gi|282913769|ref|NZ_GG730196.1|	0.712	99.288	4102	572021	576123
Staphylococcus_#_aureus_!_subsp._{_aureus_}_MRSA177_genomic_scaffold_Scfld252_whole_genome_shotgun_sequence|gi|422743901|ref|NZ_GL638230.1|	2.854	97.146	4102	139649	143751
Bacillus_#_thuringiensis_!_str._{_Al_}_Hakam_chromosome_complete_genome|gi|118475778|ref|NC_008600.1|	0.078	99.922	4100	5252991	5257091
Staphylococcus_#_epidermidis_!_RP62A_{_complete_}_genome|gi|57865352|ref|NC_002976.3|	0.157	99.843	4100	2612430	2616530
Staphylococcus_#_aureus_!_subsp._{_aureus_}_M876_genomic_scaffold_supercont1.6_whole_genome_shotgun_sequence|gi|257435946|ref|NZ_GG700619.1|	0.696	99.304	4002	570882	574884
Staphylococcus_#_aureus_!_M0424_{_genomic_}_scaffold_acunn-supercont1.4_whole_genome_shotgun_sequence|gi|487368234|ref|NZ_KB821340.1|	1.343	98.657	3989	293094	297083
Staphylococcus_#_aureus_!_M0633_{_genomic_}_scaffold_acyCm-supercont1.3_whole_genome_shotgun_sequence|gi|487371977|ref|NZ_KB821509.1|	1.322	98.678	3989	297664	301653
Staphylococcus_#_saprophyticus_!_subsp._{_saprophyticus_}_ATCC_15305_complete_genome|gi|73661309|ref|NC_007350.1|	0.156	99.844	3926	2512649	2516575
Bacillus_#_megaterium_!_WSH-002_{_chromosome_}_complete_genome|gi|384044176|ref|NC_017138.1|	0.078	99.922	3901	4980074	4983975
Bacillus_#_cereus_!_G9842_{_chromosome_}_complete_genome|gi|218895141|ref|NC_011772.1|	0.072	99.928	3900	5383434	5387334
Staphylococcus_#_aureus_!_M0695_{_genomic_}_scaffold_acunx-supercont1.3_whole_genome_shotgun_sequence|gi|489044994|ref|NZ_KB821608.1|	8.281	91.719	3747	41503	45250
Staphylococcus_#_haemolyticus_!_JCSC1435_{_chromosome_}_complete_genome|gi|70725001|ref|NC_007168.1|	0.139	99.861	3720	2681295	2685015
Bacillus_#_cereus_!_AH820_{_chromosome_}_complete_genome|gi|218901206|ref|NC_011773.1|	0.068	99.932	3600	5299083	5302683
Staphylococcus_#_aureus_!_M0946_{_genomic_}_scaffold_acunJ-supercont1.3_whole_genome_shotgun_sequence|gi|487387957|ref|NZ_KB821788.1|	0.562	99.438	3502	619528	623030
Staphylococcus_#_aureus_!_subsp._{_aureus_}_MRSA177_genomic_scaffold_Scfld42_whole_genome_shotgun_sequence|gi|422742527|ref|NZ_GL638205.1|	1.738	98.262	3502	198016	201518
Staphylococcus_#_aureus_!_subsp._{_aureus_}_WBG10049_genomic_scaffold_supercont1.5_whole_genome_shotgun_sequence|gi|282910944|ref|NZ_GG730212.1|	0.595	99.405	3502	585064	588566
Staphylococcus_#_aureus_!_M0035_{_genomic_}_scaffold_acqxl-supercont1.2_whole_genome_shotgun_sequence|gi|486228657|ref|NZ_KB820966.1|	0.122	99.878	3501	2857294	2860795
Staphylococcus_#_aureus_!_subsp._{_aureus_}_D139_genomic_scaffold_supercont1.17_whole_genome_shotgun_sequence|gi|282916507|ref|NZ_GG730175.1|	0.502	99.498	3501	693372	696873
Staphylococcus_#_aureus_!_M0396_{_genomic_}_scaffold_acunf-supercont1.3_whole_genome_shotgun_sequence|gi|487367179|ref|NZ_KB821298.1|	0.825	99.175	3428	411859	415287
Staphylococcus_#_aureus_!_M0586_{_genomic_}_scaffold_acunQ-supercont1.1_whole_genome_shotgun_sequence|gi|487371607|ref|NZ_KB821500.1|	0.116	99.884	3384	2924640	2928024
Staphylococcus_#_aureus_!_subsp._{_aureus_}_C101_genomic_scaffold_supercont1.2_whole_genome_shotgun_sequence|gi|282922348|ref|NZ_GG730121.1|	0.507	99.493	3329	653318	656647
Staphylococcus_#_aureus_!_subsp._{_aureus_}_M809_genomic_scaffold_supercont1.25_whole_genome_shotgun_sequence|gi|293511363|ref|NZ_GG749323.1|	0.601	99.399	3328	549992	553320
Staphylococcus_#_lugdunensis_!_HKU09-01_{_chromosome_}_complete_genome|gi|289549371|ref|NC_013893.1|	0.125	99.875	3312	2655054	2658366
Staphylococcus_#_aureus_!_M1253_{_genomic_}_scaffold_acunj-supercont1.1_whole_genome_shotgun_sequence|gi|486669659|ref|NZ_KB822112.1|	0.114	99.886	3301	2880163	2883464
Staphylococcus_#_aureus_!_M1367_{_genomic_}_scaffold_acumK-supercont1.2_whole_genome_shotgun_sequence|gi|487027023|ref|NZ_KB822208.1|	0.115	99.885	3301	2871155	2874456
Staphylococcus_#_epidermidis_!_ATCC_{_12228_}_chromosome_complete_genome|gi|27466918|ref|NC_004461.1|	0.131	99.869	3275	2496004	2499279
Staphylococcus_#_aureus_!_subsp._{_aureus_}_WW2703/97_genomic_scaffold_supercont1.13_whole_genome_shotgun_sequence|gi|282908001|ref|NZ_GG730232.1|	0.683	99.317	3268	475123	478391
Staphylococcus_#_aureus_!_subsp._{_aureus_}_M899_genomic_scaffold_supercont1.2_whole_genome_shotgun_sequence|gi|282912717|ref|NZ_GG730191.1|	0.494	99.506	3229	650320	653549
Bacillus_#_cereus_!_biovar_{_anthracis_}_str._CI_chromosome_complete_genome|gi|301051741|ref|NC_014335.1|	0.062	99.938	3200	5192854	5196054
Staphylococcus_#_aureus_!_M0363_{_genomic_}_scaffold_acunN-supercont1.2_whole_genome_shotgun_sequence|gi|487364822|ref|NZ_KB821272.1|	0.109	99.891	3101	2844371	2847472
Staphylococcus_#_aureus_!_subsp._{_aureus_}_M1015_genomic_scaffold_supercont1.6_whole_genome_shotgun_sequence|gi|293526348|ref|NZ_GG749001.1|	0.659	99.341	3101	467180	470281
Staphylococcus_#_aureus_!_M0571_{_genomic_}_scaffold_acumO-supercont1.2_whole_genome_shotgun_sequence|gi|487370688|ref|NZ_KB821477.1|	0.107	99.893	3099	2896656	2899755
Staphylococcus_#_carnosus_!_subsp._{_carnosus_}_TM300_chromosome_complete_genome|gi|224475494|ref|NC_012121.1|	0.12	99.88	3076	2563348	2566424
Staphylococcus_#_aureus_!_subsp._{_aureus_}_MRSA177_genomic_scaffold_Scfld14_whole_genome_shotgun_sequence|gi|422742133|ref|NZ_GL638200.1|	2.14	97.86	3070	140412	143482
Staphylococcus_#_aureus_!_subsp._{_aureus_}_WW2703/97_genomic_scaffold_supercont1.26_whole_genome_shotgun_sequence|gi|282908680|ref|NZ_GG730245.1|	0.54	99.46	3002	553132	556134
Staphylococcus_#_aureus_!_M0536_{_genomic_}_scaffold_acvqu-supercont1.3_whole_genome_shotgun_sequence|gi|486345866|ref|NZ_KB821468.1|	0.138	99.862	3001	2172810	2175811
Staphylococcus_#_aureus_!_subsp._{_aureus_}_MRSA131_genomic_scaffold_Scfld55_whole_genome_shotgun_sequence|gi|422745238|ref|NZ_GL638171.1|	2.237	97.763	3001	131176	134177
Bacillus_#_coagulans_!_36D1_{_chromosome_}_complete_genome|gi|347750441|ref|NC_016023.1|	0.084	99.916	3000	3549226	3552226
Staphylococcus_#_aureus_!_subsp._{_aureus_}_C101_genomic_scaffold_supercont1.8_whole_genome_shotgun_sequence|gi|282923802|ref|NZ_GG730127.1|	0.807	99.193	2901	356546	359447
Staphylococcus_#_aureus_!_M1311_{_genomic_}_scaffold_aculZ-supercont1.6_whole_genome_shotgun_sequence|gi|486856699|ref|NZ_KB822180.1|	0.528	99.472	2900	545882	548782
Staphylococcus_#_aureus_!_subsp._{_aureus_}_D139_genomic_scaffold_supercont1.25_whole_genome_shotgun_sequence|gi|282917720|ref|NZ_GG730183.1|	0.672	99.328	2895	427797	430692
Staphylococcus_#_aureus_!_M0306_{_genomic_}_scaffold_acunR-supercont1.1_whole_genome_shotgun_sequence|gi|487363159|ref|NZ_KB821198.1|	0.097	99.903	2802	2871204	2874006
Staphylococcus_#_aureus_!_subsp._{_aureus_}_MRSA131_genomic_scaffold_Scfld153_whole_genome_shotgun_sequence|gi|422746362|ref|NZ_GL638182.1|	1.367	98.633	2802	202126	204928
Staphylococcus_#_aureus_!_subsp._{_aureus_}_EMRSA16_genomic_scaffold_supercont1.20_whole_genome_shotgun_sequence|gi|295428968|ref|NZ_GG770532.1|	0.679	99.321	2801	409527	412328
Bacillus_#_cereus_!_NC7401_{_complete_}_genome|gi|375282101|ref|NC_016771.1|	0.054	99.946	2800	5218781	5221581
Lysinibacillus_#_sphaericus_!_C3-41_{_chromosome_}_complete_genome|gi|169825618|ref|NC_010382.1|	0.06	99.94	2800	4637021	4639821
Staphylococcus_#_aureus_!_M0687_{_genomic_}_scaffold_acvqC-supercont1.5_whole_genome_shotgun_sequence|gi|486366366|ref|NZ_KB821581.1|	0.196	99.804	2800	1425707	1428507
Staphylococcus_#_aureus_!_subsp._{_aureus_}_WBG10049_genomic_scaffold_supercont1.4_whole_genome_shotgun_sequence|gi|282910573|ref|NZ_GG730211.1|	0.677	99.323	2768	405985	408753
Staphylococcus_#_aureus_!_M0288_{_genomic_}_scaffold_acqwg-supercont1.1_whole_genome_shotgun_sequence|gi|487376330|ref|NZ_KB821190.1|	0.22	99.78	2711	1228340	1231051
Staphylococcus_#_aureus_!_M1034_{_genomic_}_scaffold_acumn-supercont1.8_whole_genome_shotgun_sequence|gi|487391857|ref|NZ_KB821859.1|	0.522	99.478	2701	515090	517791
Staphylococcus_#_aureus_!_subsp._{_aureus_}_WBG10049_genomic_scaffold_supercont1.3_whole_genome_shotgun_sequence|gi|282910157|ref|NZ_GG730210.1|	0.625	99.375	2700	429559	432259
Macrococcus_#_caseolyticus_!_JCSC5402_{_complete_}_genome|gi|222150250|ref|NC_011999.1|	0.128	99.872	2696	2099628	2102324
Staphylococcus_#_lugdunensis_!_ACS-027-V-Sch2_{_genomic_}_scaffold_supercont1.1_whole_genome_shotgun_sequence|gi|448879133|ref|NZ_KB373322.1|	0.148	99.852	2608	1762140	1764748
Staphylococcus_#_aureus_!_subsp._{_aureus_}_MRSA177_genomic_scaffold_Scfld320_whole_genome_shotgun_sequence|gi|422744062|ref|NZ_GL638233.1|	1.836	98.164	2602	139120	141722
Staphylococcus_#_aureus_!_M0334_{_genomic_}_scaffold_acumz-supercont1.4_whole_genome_shotgun_sequence|gi|487363716|ref|NZ_KB821237.1|	0.17	99.83	2601	1526175	1528776
Staphylococcus_#_aureus_!_M0350_{_genomic_}_scaffold_acunH-supercont1.2_whole_genome_shotgun_sequence|gi|487364069|ref|NZ_KB821251.1|	0.096	99.904	2601	2708753	2711354
Bacillus_#_anthracis_!_str._{_A0248_}_complete_genome|gi|229599883|ref|NC_012659.1|	0.05	99.95	2600	5224819	5227419
Bacillus_#_thuringiensis_!_serovar_{_thuringiensis_}_str._IS5056_complete_genome|gi|452196381|ref|NC_020376.1|	0.047	99.953	2600	5489335	5491935
Staphylococcus_#_aureus_!_M1309_{_genomic_}_scaffold_acunC-supercont1.3_whole_genome_shotgun_sequence|gi|487398415|ref|NZ_KB822158.1|	0.21	99.79	2587	1226938	1229525
Staphylococcus_#_aureus_!_M1199_{_genomic_}_scaffold_acunF-supercont1.1_whole_genome_shotgun_sequence|gi|486447954|ref|NZ_KB822062.1|	0.108	99.892	2510	2320027	2322537
Staphylococcus_#_aureus_!_subsp._{_aureus_}_58-424_genomic_scaffold_supercont1.10_whole_genome_shotgun_sequence|gi|293503318|ref|NZ_GG749063.1|	0.587	99.413	2502	423790	426292
Staphylococcus_#_aureus_!_subsp._{_aureus_}_MRSA177_genomic_scaffold_Scfld209_whole_genome_shotgun_sequence|gi|422743733|ref|NZ_GL638226.1|	2.229	97.771	2502	109723	112225
Staphylococcus_#_aureus_!_M0029_{_genomic_}_scaffold_acqwZ-supercont1.2_whole_genome_shotgun_sequence|gi|486225786|ref|NZ_KB820963.1|	0.087	99.913	2501	2860678	2863179
Staphylococcus_#_aureus_!_M0171_{_genomic_}_scaffold_acqwu-supercont1.5_whole_genome_shotgun_sequence|gi|487372978|ref|NZ_KB821065.1|	0.164	99.836	2501	1518395	1520896
Staphylococcus_#_aureus_!_M1255_{_genomic_}_scaffold_acunA-supercont1.3_whole_genome_shotgun_sequence|gi|486684463|ref|NZ_KB822118.1|	0.198	99.802	2501	1260142	1262643
Staphylococcus_#_aureus_!_M1311_{_genomic_}_scaffold_aculZ-supercont1.5_whole_genome_shotgun_sequence|gi|486843581|ref|NZ_KB822179.1|	0.429	99.571	2501	580415	582916
Bacillus_#_sp._!_1NLA3E_{_complete_}_genome|gi|488570484|ref|NC_021171.1|	0.052	99.948	2500	4813102	4815602
Staphylococcus_#_aureus_!_subsp._{_aureus_}_55/2053_genomic_scaffold_supercont1.3_whole_genome_shotgun_sequence|gi|257424630|ref|NZ_GG700535.1|	0.586	99.414	2500	424156	426656
Staphylococcus_#_aureus_!_subsp._{_aureus_}_65-1322_genomic_scaffold_supercont1.5_whole_genome_shotgun_sequence|gi|257427298|ref|NZ_GG700563.1|	0.584	99.416	2500	425540	428040
Staphylococcus_#_aureus_!_subsp._{_aureus_}_A017934/97_genomic_scaffold_supercont1.7_whole_genome_shotgun_sequence|gi|283957314|ref|NZ_GG731501.1|	0.566	99.434	2500	438971	441471
Staphylococcus_#_aureus_!_subsp._{_aureus_}_C160_genomic_scaffold_supercont1.4_whole_genome_shotgun_sequence|gi|282903104|ref|NZ_GG730276.1|	0.573	99.427	2500	433747	436247
Staphylococcus_#_aureus_!_subsp._{_aureus_}_E1410_genomic_scaffold_supercont1.5_whole_genome_shotgun_sequence|gi|257432636|ref|NZ_GG700601.1|	0.581	99.419	2500	427565	430065
Staphylococcus_#_aureus_!_subsp._{_aureus_}_M876_genomic_scaffold_supercont1.5_whole_genome_shotgun_sequence|gi|257435540|ref|NZ_GG700618.1|	0.586	99.414	2500	424020	426520
Staphylococcus_#_aureus_!_M1170_{_genomic_}_scaffold_acume-supercont1.1_whole_genome_shotgun_sequence|gi|486434630|ref|NZ_KB822067.1|	0.087	99.913	2499	2868750	2871249
Staphylococcus_#_sp._!_HGB0015_{_genomic_}_scaffold_aczIz-supercont1.2_whole_genome_shotgun_sequence|gi|512478261|ref|NZ_KE150418.1|	0.243	99.757	2445	1003805	1006250
Staphylococcus_#_aureus_!_subsp._{_aureus_}_55/2053_genomic_scaffold_supercont1.6_whole_genome_shotgun_sequence|gi|257425560|ref|NZ_GG700538.1|	0.574	99.426	2402	415919	418321
Staphylococcus_#_aureus_!_subsp._{_aureus_}_M876_genomic_scaffold_supercont1.9_whole_genome_shotgun_sequence|gi|257436456|ref|NZ_GG700622.1|	0.569	99.431	2402	419496	421898
Staphylococcus_#_aureus_!_M0367_{_genomic_}_scaffold_acunU-supercont1.3_whole_genome_shotgun_sequence|gi|487365191|ref|NZ_KB821276.1|	0.083	99.917	2401	2873553	2875954
Staphylococcus_#_aureus_!_M1510_{_genomic_}_scaffold_aculM-supercont1.2_whole_genome_shotgun_sequence|gi|487399506|ref|NZ_KB822258.1|	0.186	99.814	2401	1291222	1293623
Bacillus_#_anthracis_!_str._{_CDC_}_684_chromosome_complete_genome|gi|227812678|ref|NC_012581.1|	0.046	99.954	2400	5227715	5230115
Solibacillus_#_silvestris_!_StLB046_{_complete_}_genome|gi|393198727|ref|NC_018065.1|	0.06	99.94	2400	3966927	3969327
Staphylococcus_#_aureus_!_subsp._{_aureus_}_C427_genomic_scaffold_supercont1.6_whole_genome_shotgun_sequence|gi|282918303|ref|NZ_GG730146.1|	0.597	99.403	2400	399419	401819
Staphylococcus_#_aureus_!_M0946_{_genomic_}_scaffold_acunJ-supercont1.4_whole_genome_shotgun_sequence|gi|487388014|ref|NZ_KB821789.1|	0.758	99.242	2389	312824	315213
Staphylococcus_#_aureus_!_subsp._{_aureus_}_MRSA131_genomic_scaffold_Scfld52_whole_genome_shotgun_sequence|gi|422745115|ref|NZ_GL638170.1|	1.607	98.393	2378	145644	148022
Staphylococcus_#_aureus_!_subsp._{_aureus_}_MRSA177_genomic_scaffold_Scfld389_whole_genome_shotgun_sequence|gi|422744368|ref|NZ_GL638237.1|	1.605	98.395	2378	145758	148136
Staphylococcus_#_aureus_!_subsp._{_aureus_}_M809_genomic_scaffold_supercont1.11_whole_genome_shotgun_sequence|gi|293509961|ref|NZ_GG749309.1|	0.635	99.365	2301	360070	362371
Staphylococcus_#_aureus_!_subsp._{_aureus_}_55/2053_genomic_scaffold_supercont1.5_whole_genome_shotgun_sequence|gi|257425216|ref|NZ_GG700537.1|	0.576	99.424	2300	397247	399547
Staphylococcus_#_aureus_!_M0646_{_genomic_}_scaffold_acuoa-supercont1.6_whole_genome_shotgun_sequence|gi|487380761|ref|NZ_KB821517.1|	0.183	99.817	2299	1257255	1259554
Staphylococcus_#_aureus_!_M1466_{_genomic_}_scaffold_acumV-supercont1.7_whole_genome_shotgun_sequence|gi|487401900|ref|NZ_KB822399.1|	0.181	99.819	2299	1265145	1267444
Staphylococcus_#_aureus_!_M1223_{_genomic_}_scaffold_acune-supercont1.4_whole_genome_shotgun_sequence|gi|487396450|ref|NZ_KB822074.1|	1.979	98.021	2244	111125	113369
Staphylococcus_#_aureus_!_subsp._{_aureus_}_MRSA177_genomic_scaffold_Scfld68_whole_genome_shotgun_sequence|gi|422743148|ref|NZ_GL638216.1|	1.387	98.613	2202	156567	158769
Staphylococcus_#_lugdunensis_!_N920143_{_complete_}_genome|gi|385782956|ref|NC_017353.1|	0.085	99.915	2202	2593686	2595888
Staphylococcus_#_aureus_!_M0200_{_genomic_}_scaffold_acumC-supercont1.6_whole_genome_shotgun_sequence|gi|487360555|ref|NZ_KB821101.1|	0.18	99.82	2201	1221068	1223269
Staphylococcus_#_aureus_!_M0279_{_genomic_}_scaffold_acqxn-supercont1.2_whole_genome_shotgun_sequence|gi|487375990|ref|NZ_KB821175.1|	0.127	99.873	2201	1736314	1738515
Staphylococcus_#_aureus_!_subsp._{_aureus_}_M899_genomic_scaffold_supercont1.8_whole_genome_shotgun_sequence|gi|282914286|ref|NZ_GG730197.1|	0.563	99.437	2201	388821	391022
Staphylococcus_#_aureus_!_M0844_{_genomic_}_scaffold_acvqL-supercont1.2_whole_genome_shotgun_sequence|gi|486385588|ref|NZ_KB821711.1|	0.09	99.91	2200	2449259	2451459
Staphylococcus_#_aureus_!_subsp._{_aureus_}_C101_genomic_scaffold_supercont1.6_whole_genome_shotgun_sequence|gi|282923265|ref|NZ_GG730125.1|	0.553	99.447	2200	395518	397718
Staphylococcus_#_aureus_!_subsp._{_aureus_}_M1015_genomic_scaffold_supercont1.4_whole_genome_shotgun_sequence|gi|293523927|ref|NZ_GG748999.1|	0.553	99.447	2200	395786	397986
Staphylococcus_#_aureus_!_subsp._{_aureus_}_M899_genomic_scaffold_supercont1.5_whole_genome_shotgun_sequence|gi|282913349|ref|NZ_GG730194.1|	0.554	99.446	2200	394920	397120
Staphylococcus_#_aureus_!_M0340_{_genomic_}_scaffold_acqxN-supercont1.3_whole_genome_shotgun_sequence|gi|486281296|ref|NZ_KB821243.1|	1.222	98.778	2199	177715	179914
Staphylococcus_#_aureus_!_M0006_{_genomic_}_scaffold_aculO-supercont1.8_whole_genome_shotgun_sequence|gi|487267757|ref|NZ_KB820960.1|	0.226	99.774	2174	958576	960750
Staphylococcus_#_aureus_!_M0934_{_genomic_}_scaffold_acvqs-supercont1.2_whole_genome_shotgun_sequence|gi|486388784|ref|NZ_KB821761.1|	0.309	99.691	2173	700689	702862
Staphylococcus_#_aureus_!_M0328_{_genomic_}_scaffold_acrGR-supercont1.3_whole_genome_shotgun_sequence|gi|486272254|ref|NZ_KB821213.1|	0.325	99.675	2101	644119	646220
Staphylococcus_#_aureus_!_M0494_{_genomic_}_scaffold_acqyb-supercont1.1_whole_genome_shotgun_sequence|gi|486320731|ref|NZ_KB821405.1|	0.075	99.925	2101	2781201	2783302
Staphylococcus_#_aureus_!_M1060_{_genomic_}_scaffold_acunt-supercont1.1_whole_genome_shotgun_sequence|gi|487400592|ref|NZ_KB822368.1|	0.089	99.911	2101	2353957	2356058
Staphylococcus_#_aureus_!_subsp._{_aureus_}_MRSA177_genomic_scaffold_Scfld20_whole_genome_shotgun_sequence|gi|422742311|ref|NZ_GL638202.1|	1.951	98.049	2101	105586	107687
Bacillus_#_licheniformis_!_9945A_{_complete_}_genome|gi|511060863|ref|NC_021362.1|	0.048	99.952	2100	4374205	4376305
Bacillus_#_subtilis_!_BSn5_{_chromosome_}_complete_genome|gi|321311376|ref|NC_014976.1|	0.051	99.949	2100	4091499	4093599
Staphylococcus_#_aureus_!_HI013_{_genomic_}_scaffold_acqwl-supercont1.3_whole_genome_shotgun_sequence|gi|486215850|ref|NZ_KB820900.1|	1.839	98.161	2090	111576	113666
Staphylococcus_#_aureus_!_M0103_{_genomic_}_scaffold_acqxd-supercont1.4_whole_genome_shotgun_sequence|gi|486246367|ref|NZ_KB821017.1|	0.164	99.836	2001	1220361	1222362
Staphylococcus_#_aureus_!_subsp._{_aureus_}_D139_genomic_scaffold_supercont1.13_whole_genome_shotgun_sequence|gi|282916185|ref|NZ_GG730171.1|	0.598	99.402	2001	332656	334657
Staphylococcus_#_aureus_!_subsp._{_aureus_}_H19_genomic_scaffold_supercont1.9_whole_genome_shotgun_sequence|gi|283770944|ref|NZ_GG730343.1|	0.857	99.143	2001	231472	233473
Staphylococcus_#_aureus_!_subsp._{_aureus_}_MRSA177_genomic_scaffold_Scfld22_whole_genome_shotgun_sequence|gi|422742404|ref|NZ_GL638203.1|	2.284	97.716	2001	85620	87621
Bacillus_#_amyloliquefaciens_!_subsp._{_plantarum_}_AS43.3_chromosome_complete_genome|gi|429503531|ref|NC_019842.1|	0.05	99.95	2000	3959368	3961368
Bacillus_#_subtilis_!_subsp._{_natto_}_BEST195_complete_genome_***_SEQUENCING_IN_PROGRESS_***|gi|428277412|ref|NC_017196.1|	0.049	99.951	2000	4089591	4091591
Bacillus_#_subtilis_!_subsp._{_spizizenii_}_TU-B-10_chromosome_complete_genome|gi|350264100|ref|NC_016047.1|	0.048	99.952	2000	4205222	4207222
Bacillus_#_subtilis_!_subsp._{_subtilis_}_str._168_chromosome_complete_genome|gi|255767013|ref|NC_000964.3|	0.047	99.953	2000	4213606	4215606
Bacillus_#_subtilis_!_subsp._{_subtilis_}_str._BSP1_chromosome_complete_genome|gi|430755491|ref|NC_019896.1|	0.049	99.951	2000	4041754	4043754
Geobacillus_#_sp._!_WCH70_{_chromosome_}_complete_genome|gi|239825584|ref|NC_012793.1|	0.058	99.942	2000	3462618	3464618
Geobacillus_#_sp._!_Y4.1MC1_{_chromosome_}_complete_genome|gi|312109151|ref|NC_014650.1|	0.052	99.948	2000	3838330	3840330
Staphylococcus_#_aureus_!_M0692_{_genomic_}_scaffold_acvqM-supercont1.8_whole_genome_shotgun_sequence|gi|486369751|ref|NZ_KB821594.1|	0.195	99.805	2000	1026184	1028184
Staphylococcus_#_aureus_!_M0900_{_genomic_}_scaffold_acunz-supercont1.6_whole_genome_shotgun_sequence|gi|487386371|ref|NZ_KB821744.1|	0.287	99.713	2000	695657	697657
Staphylococcus_#_aureus_!_M1311_{_genomic_}_scaffold_aculZ-supercont1.4_whole_genome_shotgun_sequence|gi|486840504|ref|NZ_KB822178.1|	0.533	99.467	2000	373436	375436
Staphylococcus_#_aureus_!_M0489_{_genomic_}_scaffold_acsPG-supercont1.8_whole_genome_shotgun_sequence|gi|486318205|ref|NZ_KB821399.1|	0.157	99.843	1999	1268332	1270331
Staphylococcus_#_aureus_!_M1064_{_genomic_}_scaffold_acumU-supercont1.7_whole_genome_shotgun_sequence|gi|486421041|ref|NZ_KB821943.1|	1.123	98.877	1999	176072	178071
Staphylococcus_#_aureus_!_subsp._{_aureus_}_MRSA131_genomic_scaffold_Scfld228_whole_genome_shotgun_sequence|gi|422746915|ref|NZ_GL638189.1|	1.157	98.843	1999	170705	172704
Staphylococcus_#_aureus_!_subsp._{_aureus_}_MRSA177_genomic_scaffold_Scfld384_whole_genome_shotgun_sequence|gi|422744230|ref|NZ_GL638236.1|	1.691	98.309	1999	116194	118193
Staphylococcus_#_aureus_!_M1007_{_genomic_}_scaffold_acvqZ-supercont1.4_whole_genome_shotgun_sequence|gi|486401664|ref|NZ_KB821832.1|	1.711	98.289	1990	114289	116279
Staphylococcus_#_aureus_!_M1064_{_genomic_}_scaffold_acumU-supercont1.8_whole_genome_shotgun_sequence|gi|486421189|ref|NZ_KB821944.1|	1.655	98.345	1990	118249	120239
Staphylococcus_#_aureus_!_M1142_{_genomic_}_scaffold_acumk-supercont1.1_whole_genome_shotgun_sequence|gi|487396127|ref|NZ_KB821988.1|	0.125	99.875	1977	1573365	1575342
Staphylococcus_#_aureus_!_M1565_{_genomic_}_scaffold_acunk-supercont1.1_whole_genome_shotgun_sequence|gi|487186501|ref|NZ_KB822299.1|	0.086	99.914	1910	2208156	2210066
Staphylococcus_#_aureus_!_M0510_{_genomic_}_scaffold_acumF-supercont1.3_whole_genome_shotgun_sequence|gi|487369026|ref|NZ_KB821409.1|	0.144	99.856	1903	1321104	1323007
Staphylococcus_#_aureus_!_M0455_{_genomic_}_scaffold_acqxx-supercont1.1_whole_genome_shotgun_sequence|gi|487379684|ref|NZ_KB821355.1|	0.07	99.93	1901	2724739	2726640
Bacillus_#_amyloliquefaciens_!_DSM_{_7_}_complete_genome|gi|308171891|ref|NC_014551.1|	0.048	99.952	1900	3978299	3980199
Bacillus_#_subtilis_!_subsp._{_subtilis_}_str._JH642_chromosome_whole_genome_shotgun_sequence|gi|223666306|ref|NZ_CM000489.1|	0.045	99.955	1900	4185715	4187615
Bacillus_#_subtilis_!_subsp._{_subtilis_}_str._NCIB_3610_chromosome_whole_genome_shotgun_sequence|gi|223666305|ref|NZ_CM000488.1|	0.045	99.955	1900	4212698	4214598
Bacillus_#_subtilis_!_subsp._{_subtilis_}_str._SMY_chromosome_whole_genome_shotgun_sequence|gi|223666307|ref|NZ_CM000490.1|	0.045	99.955	1900	4212743	4214643
Geobacillus_#_thermoglucosidasius_!_C56-YS93_{_chromosome_}_complete_genome|gi|336233546|ref|NC_015660.1|	0.049	99.951	1900	3891406	3893306
Staphylococcus_#_aureus_!_M0250_{_genomic_}_scaffold_acuma-supercont1.1_whole_genome_shotgun_sequence|gi|487362212|ref|NZ_KB821141.1|	0.066	99.934	1900	2866427	2868327
Staphylococcus_#_aureus_!_M0823_{_genomic_}_scaffold_acvqk-supercont1.6_whole_genome_shotgun_sequence|gi|486383324|ref|NZ_KB821696.1|	0.201	99.799	1873	928423	930296
Staphylococcus_#_epidermidis_!_M0881_{_genomic_}_scaffold_acumm-supercont1.6_whole_genome_shotgun_sequence|gi|489048088|ref|NZ_KB821726.1|	0.186	99.814	1870	1003344	1005214
Staphylococcus_#_aureus_!_M0529_{_genomic_}_scaffold_acumA-supercont1.1_whole_genome_shotgun_sequence|gi|486413843|ref|NZ_KB821431.1|	0.095	99.905	1811	1912707	1914518
Staphylococcus_#_aureus_!_M0197_{_genomic_}_scaffold_acrGV-supercont1.1_whole_genome_shotgun_sequence|gi|486256732|ref|NZ_KB821084.1|	0.094	99.906	1810	1930966	1932776
Staphylococcus_#_aureus_!_M1544_{_genomic_}_scaffold_acunm-supercont1.5_whole_genome_shotgun_sequence|gi|487139035|ref|NZ_KB822280.1|	0.259	99.741	1810	697886	699696
Staphylococcus_#_aureus_!_subsp._{_aureus_}_WW2703/97_genomic_scaffold_supercont1.35_whole_genome_shotgun_sequence|gi|282909609|ref|NZ_GG730254.1|	0.51	99.49	1802	351613	353415
Staphylococcus_#_aureus_!_M1215_{_genomic_}_scaffold_aculX-supercont1.1_whole_genome_shotgun_sequence|gi|486506047|ref|NZ_KB822069.1|	0.064	99.936	1801	2825629	2827430
Staphylococcus_#_aureus_!_M1520_{_genomic_}_scaffold_acunp-supercont1.1_whole_genome_shotgun_sequence|gi|487137167|ref|NZ_KB822266.1|	0.064	99.936	1801	2817013	2818814
Staphylococcus_#_aureus_!_subsp._{_aureus_}_MRSA177_genomic_scaffold_Scfld52_whole_genome_shotgun_sequence|gi|422742750|ref|NZ_GL638208.1|	1.588	98.412	1801	111627	113428
Amphibacillus_#_xylanus_!_NBRC_{_15112_}_complete_genome|gi|408355363|ref|NC_018704.1|	0.07	99.93	1800	2567686	2569486
Bacillus_#_coagulans_!_2-6_{_chromosome_}_complete_genome|gi|336112679|ref|NC_015634.1|	0.059	99.941	1800	3071279	3073079
Exiguobacterium_#_antarcticum_!_B7_{_chromosome_}_complete_genome|gi|407475894|ref|NC_018665.1|	0.064	99.936	1800	2814063	2815863
Exiguobacterium_#_sibiricum_!_255-15_{_chromosome_}_complete_genome|gi|172056045|ref|NC_010556.1|	0.059	99.941	1800	3032336	3034136
Geobacillus_#_thermoleovorans_!_CCB_US3_UF5_{_chromosome_}_complete_genome|gi|375006802|ref|NC_016593.1|	0.05	99.95	1800	3594820	3596620
Staphylococcus_#_aureus_!_M0077_{_genomic_}_scaffold_acunP-supercont1.2_whole_genome_shotgun_sequence|gi|487350114|ref|NZ_KB821000.1|	0.147	99.853	1800	1221861	1223661
Staphylococcus_#_aureus_!_M0799_{_genomic_}_scaffold_acvqq-supercont1.7_whole_genome_shotgun_sequence|gi|486380307|ref|NZ_KB821659.1|	0.266	99.734	1800	674176	675976
Staphylococcus_#_aureus_!_M0946_{_genomic_}_scaffold_acunJ-supercont1.8_whole_genome_shotgun_sequence|gi|487388234|ref|NZ_KB821793.1|	0.517	99.483	1800	346355	348155
Staphylococcus_#_aureus_!_M0964_{_genomic_}_scaffold_aculV-supercont1.5_whole_genome_shotgun_sequence|gi|487388602|ref|NZ_KB821805.1|	0.143	99.857	1800	1258351	1260151
Staphylococcus_#_aureus_!_M1063_{_genomic_}_scaffold_acumZ-supercont1.8_whole_genome_shotgun_sequence|gi|486416926|ref|NZ_KB821910.1|	0.265	99.735	1800	676876	678676
Staphylococcus_#_aureus_!_M1076_{_genomic_}_scaffold_acumq-supercont1.1_whole_genome_shotgun_sequence|gi|486417634|ref|NZ_KB821951.1|	0.121	99.879	1800	1491760	1493560
Staphylococcus_#_aureus_!_subsp._{_aureus_}_MRSA131_genomic_scaffold_Scfld253_whole_genome_shotgun_sequence|gi|422747121|ref|NZ_GL638191.1|	2.031	97.969	1800	86840	88640
Staphylococcus_#_aureus_!_M1321_{_genomic_}_scaffold_acunh-supercont1.6_whole_genome_shotgun_sequence|gi|486924102|ref|NZ_KB822196.1|	0.277	99.723	1776	639183	640959
Staphylococcus_#_aureus_!_M0280_{_genomic_}_scaffold_acunT-supercont1.6_whole_genome_shotgun_sequence|gi|487362590|ref|NZ_KB821186.1|	0.191	99.809	1775	928920	930695
Staphylococcus_#_aureus_!_M0478_{_genomic_}_scaffold_acrGZ-supercont1.5_whole_genome_shotgun_sequence|gi|486313128|ref|NZ_KB821380.1|	0.195	99.805	1775	906243	908018
Staphylococcus_#_aureus_!_M1119_{_genomic_}_scaffold_acunS-supercont1.5_whole_genome_shotgun_sequence|gi|486431063|ref|NZ_KB822029.1|	0.274	99.726	1774	646853	648627
Staphylococcus_#_aureus_!_M0438_{_genomic_}_scaffold_acuml-supercont1.3_whole_genome_shotgun_sequence|gi|487368648|ref|NZ_KB821352.1|	0.14	99.86	1701	1212591	1214292
Staphylococcus_#_aureus_!_M0792_{_genomic_}_scaffold_acuni-supercont1.8_whole_genome_shotgun_sequence|gi|487383273|ref|NZ_KB821678.1|	0.095	99.905	1701	1788892	1790593
Staphylococcus_#_aureus_!_M1193_{_genomic_}_scaffold_acunb-supercont1.1_whole_genome_shotgun_sequence|gi|487401055|ref|NZ_KB822373.1|	0.06	99.94	1701	2843233	2844934
Geobacillus_#_thermodenitrificans_!_NG80-2_{_chromosome_}_complete_genome|gi|138893679|ref|NC_009328.1|	0.048	99.952	1700	3548619	3550319
Staphylococcus_#_aureus_!_M0408_{_genomic_}_scaffold_acrHk-supercont1.2_whole_genome_shotgun_sequence|gi|486294733|ref|NZ_KB821327.1|	0.581	99.419	1700	290727	292427
Staphylococcus_#_aureus_!_M0528_{_genomic_}_scaffold_acvqo-supercont1.11_whole_genome_shotgun_sequence|gi|486335757|ref|NZ_KB821416.1|	0.149	99.851	1700	1138281	1139981
Staphylococcus_#_aureus_!_subsp._{_aureus_}_EMRSA16_genomic_scaffold_supercont1.7_whole_genome_shotgun_sequence|gi|295427229|ref|NZ_GG770519.1|	0.736	99.264	1700	229171	230871
Staphylococcus_#_aureus_!_M0104_{_genomic_}_scaffold_acrHp-supercont1.7_whole_genome_shotgun_sequence|gi|487372667|ref|NZ_KB821030.1|	0.277	99.723	1699	611200	612899
Staphylococcus_#_aureus_!_M1015_{_genomic_}_scaffold_acvqH-supercont1.5_whole_genome_shotgun_sequence|gi|486404951|ref|NZ_KB821838.1|	0.169	99.831	1675	990349	992024
Staphylococcus_#_aureus_!_M0404_{_genomic_}_scaffold_acrGQ-supercont1.6_whole_genome_shotgun_sequence|gi|487378947|ref|NZ_KB821307.1|	0.109	99.891	1610	1469598	1471208
Staphylococcus_#_aureus_!_subsp._{_aureus_}_M1015_genomic_scaffold_supercont1.9_whole_genome_shotgun_sequence|gi|293530869|ref|NZ_GG749004.1|	0.896	99.104	1602	177147	178749
Staphylococcus_#_aureus_!_M1034_{_genomic_}_scaffold_acumn-supercont1.6_whole_genome_shotgun_sequence|gi|487391557|ref|NZ_KB821857.1|	0.466	99.534	1601	342132	343733
Staphylococcus_#_aureus_!_M1394_{_genomic_}_scaffold_acuny-supercont1.1_whole_genome_shotgun_sequence|gi|487083277|ref|NZ_KB822228.1|	0.057	99.943	1601	2814839	2816440
Staphylococcus_#_aureus_!_subsp._{_aureus_}_M809_genomic_scaffold_supercont1.10_whole_genome_shotgun_sequence|gi|293509762|ref|NZ_GG749308.1|	0.773	99.227	1601	205396	206997
Staphylococcus_#_aureus_!_subsp._{_aureus_}_TCH130_genomic_scaffold_SCAFFOLD4_whole_genome_shotgun_sequence|gi|255925766|ref|NZ_GG698161.1|	0.788	99.212	1601	201607	203208
Staphylococcus_#_aureus_!_subsp._{_aureus_}_USA300_TCH959_genomic_scaffold_SCAFFOLD4_whole_genome_shotgun_sequence|gi|255926320|ref|NZ_GG697988.1|	1.458	98.542	1601	108173	109774
Geobacillus_#_sp._!_C56-T3_{_chromosome_}_complete_genome|gi|297528376|ref|NC_014206.1|	0.044	99.956	1600	3649213	3650813
Geobacillus_#_sp._!_Y412MC52_{_chromosome_}_complete_genome|gi|319765157|ref|NC_014915.1|	0.044	99.956	1600	3627283	3628883
Staphylococcus_#_aureus_!_M0144_{_genomic_}_scaffold_acunq-supercont1.3_whole_genome_shotgun_sequence|gi|487359205|ref|NZ_KB821040.1|	0.173	99.827	1600	925392	926992
Staphylococcus_#_aureus_!_subsp._{_aureus_}_68-397_genomic_scaffold_supercont1.4_whole_genome_shotgun_sequence|gi|257429934|ref|NZ_GG700577.1|	0.537	99.463	1600	296212	297812
Staphylococcus_#_aureus_!_subsp._{_aureus_}_D139_genomic_scaffold_supercont1.20_whole_genome_shotgun_sequence|gi|282917134|ref|NZ_GG730178.1|	0.897	99.103	1600	176854	178454
Staphylococcus_#_aureus_!_subsp._{_aureus_}_USA300_TCH959_genomic_scaffold_SCAFFOLD3_whole_genome_shotgun_sequence|gi|255926319|ref|NZ_GG697987.1|	0.875	99.125	1600	181290	182890
Staphylococcus_#_aureus_!_M0547_{_genomic_}_scaffold_acvqJ-supercont1.4_whole_genome_shotgun_sequence|gi|486351837|ref|NZ_KB821445.1|	0.23	99.77	1510	654762	656272
Staphylococcus_#_aureus_!_subsp._{_aureus_}_M899_genomic_scaffold_supercont1.17_whole_genome_shotgun_sequence|gi|282915018|ref|NZ_GG730206.1|	0.412	99.588	1502	362863	364365
Staphylococcus_#_aureus_!_M0404_{_genomic_}_scaffold_acrGQ-supercont1.4_whole_genome_shotgun_sequence|gi|487378778|ref|NZ_KB821305.1|	0.143	99.857	1501	1044902	1046403
Staphylococcus_#_aureus_!_M1322_{_genomic_}_scaffold_acumT-supercont1.2_whole_genome_shotgun_sequence|gi|486956393|ref|NZ_KB822201.1|	0.058	99.942	1501	2595103	2596604
Staphylococcus_#_aureus_!_M1451_{_genomic_}_scaffold_acunE-supercont1.4_whole_genome_shotgun_sequence|gi|480457480|ref|NZ_KB822244.1|	0.077	99.923	1501	1953216	1954717
Staphylococcus_#_aureus_!_M1531_{_genomic_}_scaffold_acunL-supercont1.2_whole_genome_shotgun_sequence|gi|487137933|ref|NZ_KB822264.1|	0.063	99.937	1501	2383845	2385346
Staphylococcus_#_aureus_!_subsp._{_aureus_}_55/2053_genomic_scaffold_supercont1.4_whole_genome_shotgun_sequence|gi|257425046|ref|NZ_GG700536.1|	0.856	99.144	1501	173878	175379
Staphylococcus_#_aureus_!_subsp._{_aureus_}_M809_genomic_scaffold_supercont1.13_whole_genome_shotgun_sequence|gi|293510275|ref|NZ_GG749311.1|	0.639	99.361	1501	233395	234896
Staphylococcus_#_aureus_!_M1103_{_genomic_}_scaffold_acump-supercont1.5_whole_genome_shotgun_sequence|gi|486429182|ref|NZ_KB822038.1|	0.161	99.839	1500	930675	932175
Staphylococcus_#_aureus_!_M1359_{_genomic_}_scaffold_acumL-supercont1.1_whole_genome_shotgun_sequence|gi|486986178|ref|NZ_KB822204.1|	0.074	99.926	1500	2027869	2029369
Staphylococcus_#_aureus_!_M1407_{_genomic_}_scaffold_acuod-supercont1.1_whole_genome_shotgun_sequence|gi|487401530|ref|NZ_KB822379.1|	0.093	99.907	1500	1617445	1618945
Staphylococcus_#_aureus_!_subsp._{_aureus_}_Btn1260_genomic_scaffold_supercont1.5_whole_genome_shotgun_sequence|gi|282905146|ref|NZ_GG730260.1|	0.853	99.147	1500	174446	175946
Staphylococcus_#_aureus_!_subsp._{_aureus_}_EMRSA16_genomic_scaffold_supercont1.15_whole_genome_shotgun_sequence|gi|295428440|ref|NZ_GG770527.1|	0.807	99.193	1500	184434	185934
Staphylococcus_#_aureus_!_subsp._{_aureus_}_WW2703/97_genomic_scaffold_supercont1.36_whole_genome_shotgun_sequence|gi|282909938|ref|NZ_GG730255.1|	0.714	99.286	1500	208517	210017
Staphylococcus_#_aureus_!_M0197_{_genomic_}_scaffold_acrGV-supercont1.3_whole_genome_shotgun_sequence|gi|486257669|ref|NZ_KB821086.1|	0.29	99.71	1499	515290	516789
Staphylococcus_#_aureus_!_M1521_{_genomic_}_scaffold_acunr-supercont1.4_whole_genome_shotgun_sequence|gi|487137439|ref|NZ_KB822271.1|	0.235	99.765	1475	624976	626451
Staphylococcus_#_aureus_!_M0415_{_genomic_}_scaffold_acrGP-supercont1.4_whole_genome_shotgun_sequence|gi|487379243|ref|NZ_KB821320.1|	0.311	99.689	1474	472240	473714
Staphylococcus_#_aureus_!_M0946_{_genomic_}_scaffold_acunJ-supercont1.2_whole_genome_shotgun_sequence|gi|487387889|ref|NZ_KB821787.1|	0.312	99.688	1429	457059	458488
Staphylococcus_#_aureus_!_subsp._{_aureus_}_EMRSA16_genomic_scaffold_supercont1.3_whole_genome_shotgun_sequence|gi|295426606|ref|NZ_GG770515.1|	0.315	99.685	1429	452804	454233
Staphylococcus_#_aureus_!_M0060_{_genomic_}_scaffold_acrGU-supercont1.1_whole_genome_shotgun_sequence|gi|487315894|ref|NZ_KB820981.1|	0.08	99.92	1411	1767651	1769062
Staphylococcus_#_aureus_!_M0104_{_genomic_}_scaffold_acrHp-supercont1.3_whole_genome_shotgun_sequence|gi|487372502|ref|NZ_KB821026.1|	0.232	99.768	1410	607120	608530
Staphylococcus_#_aureus_!_M0329_{_genomic_}_scaffold_acrHa-supercont1.7_whole_genome_shotgun_sequence|gi|486275406|ref|NZ_KB821231.1|	0.151	99.849	1402	929443	930845
Staphylococcus_#_aureus_!_M1044_{_genomic_}_scaffold_acumE-supercont1.6_whole_genome_shotgun_sequence|gi|487392815|ref|NZ_KB821886.1|	0.223	99.777	1402	627622	629024
Staphylococcus_#_aureus_!_subsp._{_aureus_}_C101_genomic_scaffold_supercont1.20_whole_genome_shotgun_sequence|gi|282925650|ref|NZ_GG730139.1|	0.389	99.611	1402	358588	359990
Staphylococcus_#_aureus_!_subsp._{_aureus_}_MRSA177_genomic_scaffold_Scfld514_whole_genome_shotgun_sequence|gi|422744608|ref|NZ_GL638244.1|	3.038	96.962	1402	44754	46156
Staphylococcus_#_aureus_!_M0108_{_genomic_}_scaffold_acunZ-supercont1.5_whole_genome_shotgun_sequence|gi|487358807|ref|NZ_KB821037.1|	0.121	99.879	1401	1159702	1161103
Staphylococcus_#_aureus_!_M0192_{_genomic_}_scaffold_acqyc-supercont1.3_whole_genome_shotgun_sequence|gi|486255208|ref|NZ_KB821076.1|	0.061	99.939	1401	2313367	2314768
Staphylococcus_#_aureus_!_M0212_{_genomic_}_scaffold_acuna-supercont1.3_whole_genome_shotgun_sequence|gi|487360877|ref|NZ_KB821112.1|	0.111	99.889	1401	1256300	1257701
Staphylococcus_#_aureus_!_M0427_{_genomic_}_scaffold_acqxJ-supercont1.1_whole_genome_shotgun_sequence|gi|486299599|ref|NZ_KB821335.1|	0.05	99.95	1401	2809966	2811367
Staphylococcus_#_aureus_!_M0584_{_genomic_}_scaffold_acunu-supercont1.2_whole_genome_shotgun_sequence|gi|487370984|ref|NZ_KB821490.1|	0.115	99.885	1401	1212414	1213815
Staphylococcus_#_aureus_!_M0994_{_genomic_}_scaffold_acunc-supercont1.2_whole_genome_shotgun_sequence|gi|487390609|ref|NZ_KB821810.1|	0.119	99.881	1401	1174610	1176011
Staphylococcus_#_aureus_!_subsp._{_aureus_}_C101_genomic_scaffold_supercont1.9_whole_genome_shotgun_sequence|gi|282924193|ref|NZ_GG730128.1|	0.627	99.373	1401	221959	223360
Bacillus_#_amyloliquefaciens_!_LL3_{_chromosome_}_complete_genome|gi|384162404|ref|NC_017190.1|	0.035	99.965	1400	3993827	3995227
Bacillus_#_amyloliquefaciens_!_XH7_{_chromosome_}_complete_genome|gi|384166624|ref|NC_017191.1|	0.036	99.964	1400	3937803	3939203
Bacillus_#_atrophaeus_!_1942_{_chromosome_}_complete_genome|gi|311066968|ref|NC_014639.1|	0.034	99.966	1400	4166866	4168266
Bacillus_#_cereus_!_03BB102_{_complete_}_genome|gi|225862057|ref|NC_012472.1|	0.027	99.973	1400	5268228	5269628
Bacillus_#_licheniformis_!_ATCC_{_14580_}_chromosome_complete_genome|gi|163119169|ref|NC_006270.3|	0.033	99.967	1400	4221197	4222597
Bacillus_#_thuringiensis_!_serovar_{_finitimus_}_YBT-020_chromosome_complete_genome|gi|384177910|ref|NC_017200.1|	0.026	99.974	1400	5354090	5355490
Bacillus_#_thuringiensis_!_serovar_{_konkukian_}_str._97-27_chromosome_complete_genome|gi|49476684|ref|NC_005957.1|	0.027	99.973	1400	5236282	5237682
Halobacillus_#_halophilus_!_DSM_{_2266_}_complete_genome|gi|386712343|ref|NC_017668.1|	0.034	99.966	1400	4149232	4150632
Lactobacillus_#_sanfranciscensis_!_TMW_{_1.1304_}_chromosome_complete_genome|gi|347533753|ref|NC_015978.1|	0.108	99.892	1400	1296916	1298316
Staphylococcus_#_aureus_!_M0450_{_genomic_}_scaffold_acqwq-supercont1.2_whole_genome_shotgun_sequence|gi|486302143|ref|NZ_KB821344.1|	0.217	99.783	1400	643603	645003
Staphylococcus_#_aureus_!_M0539_{_genomic_}_scaffold_acvqn-supercont1.11_whole_genome_shotgun_sequence|gi|486347448|ref|NZ_KB821452.1|	0.224	99.776	1400	622360	623760
Staphylococcus_#_aureus_!_M0660_{_genomic_}_scaffold_acumg-supercont1.10_whole_genome_shotgun_sequence|gi|487381382|ref|NZ_KB821532.1|	0.224	99.776	1400	622985	624385
Staphylococcus_#_aureus_!_M0944_{_genomic_}_scaffold_acvqy-supercont1.1_whole_genome_shotgun_sequence|gi|486393915|ref|NZ_KB821779.1|	0.086	99.914	1400	1630329	1631729
Staphylococcus_#_aureus_!_subsp._{_aureus_}_TCH130_genomic_scaffold_SCAFFOLD5_whole_genome_shotgun_sequence|gi|255925767|ref|NZ_GG698162.1|	1.3	98.7	1389	105465	106854
Staphylococcus_#_aureus_!_M0547_{_genomic_}_scaffold_acvqJ-supercont1.5_whole_genome_shotgun_sequence|gi|486352271|ref|NZ_KB821446.1|	0.219	99.781	1374	627391	628765
Staphylococcus_#_aureus_!_M0648_{_genomic_}_scaffold_acunl-supercont1.6_whole_genome_shotgun_sequence|gi|487381205|ref|NZ_KB821527.1|	0.219	99.781	1374	627117	628491
Staphylococcus_#_aureus_!_M1565_{_genomic_}_scaffold_acunk-supercont1.2_whole_genome_shotgun_sequence|gi|487189945|ref|NZ_KB822300.1|	0.219	99.781	1374	625178	626552
Staphylococcus_#_aureus_!_M0478_{_genomic_}_scaffold_acrGZ-supercont1.4_whole_genome_shotgun_sequence|gi|486312219|ref|NZ_KB821379.1|	0.216	99.784	1311	606938	608249
Staphylococcus_#_aureus_!_M0934_{_genomic_}_scaffold_acvqs-supercont1.1_whole_genome_shotgun_sequence|gi|486387797|ref|NZ_KB821760.1|	0.059	99.941	1310	2201727	2203037
Staphylococcus_#_aureus_!_M1321_{_genomic_}_scaffold_acunh-supercont1.5_whole_genome_shotgun_sequence|gi|486919067|ref|NZ_KB822195.1|	0.464	99.536	1310	281169	282479
Staphylococcus_#_aureus_!_M0978_{_genomic_}_scaffold_acunG-supercont1.7_whole_genome_shotgun_sequence|gi|487390337|ref|NZ_KB821777.1|	0.06	99.94	1302	2177956	2179258
Staphylococcus_#_aureus_!_M1229_{_genomic_}_scaffold_acunX-supercont1.4_whole_genome_shotgun_sequence|gi|486635955|ref|NZ_KB822111.1|	0.086	99.914	1302	1520548	1521850
Staphylococcus_#_aureus_!_M0347_{_genomic_}_scaffold_acqxu-supercont1.3_whole_genome_shotgun_sequence|gi|486284496|ref|NZ_KB821248.1|	0.055	99.945	1301	2362662	2363963
Staphylococcus_#_aureus_!_subsp._{_aureus_}_68-397_genomic_scaffold_supercont1.8_whole_genome_shotgun_sequence|gi|257430852|ref|NZ_GG700581.1|	0.932	99.068	1301	138306	139607
Staphylococcus_#_aureus_!_subsp._{_aureus_}_C101_genomic_scaffold_supercont1.11_whole_genome_shotgun_sequence|gi|282924532|ref|NZ_GG730130.1|	0.726	99.274	1301	178012	179313
Bacillus_#_cereus_!_ATCC_{_14579_}_complete_genome|gi|30018278|ref|NC_004722.1|	0.024	99.976	1300	5410509	5411809
Bacillus_#_cereus_!_E33L_{_chromosome_}_complete_genome|gi|52140164|ref|NC_006274.1|	0.025	99.975	1300	5299615	5300915
Bacillus_#_cereus_!_FRI-35_{_chromosome_}_complete_genome|gi|402552844|ref|NC_018491.1|	0.026	99.974	1300	5081876	5083176
Bacillus_#_cereus_!_Q1_{_chromosome_}_complete_genome|gi|222093774|ref|NC_011969.1|	0.025	99.975	1300	5212895	5214195
Bacillus_#_cytotoxicus_!_NVH_{_391-98_}_chromosome_complete_genome|gi|152973854|ref|NC_009674.1|	0.032	99.968	1300	4085724	4087024
Bacillus_#_thuringiensis_!_serovar_{_chinensis_}_CT-43_chromosome_complete_genome|gi|384184088|ref|NC_017208.1|	0.024	99.976	1300	5485530	5486830
Staphylococcus_#_aureus_!_M0237_{_genomic_}_scaffold_acrHd-supercont1.3_whole_genome_shotgun_sequence|gi|486261301|ref|NZ_KB821135.1|	0.198	99.802	1300	653786	655086
Staphylococcus_#_aureus_!_M0294_{_genomic_}_scaffold_acumG-supercont1.7_whole_genome_shotgun_sequence|gi|487400143|ref|NZ_KB822359.1|	0.17	99.83	1300	762505	763805
Staphylococcus_#_aureus_!_M0663_{_genomic_}_scaffold_acuoc-supercont1.6_whole_genome_shotgun_sequence|gi|487382141|ref|NZ_KB821557.1|	0.208	99.792	1300	623474	624774
Staphylococcus_#_aureus_!_M1061_{_genomic_}_scaffold_aculN-supercont1.5_whole_genome_shotgun_sequence|gi|487393551|ref|NZ_KB821896.1|	2.735	97.265	1300	46239	47539
Staphylococcus_#_aureus_!_subsp._{_aureus_}_MRSA177_genomic_scaffold_Scfld16_whole_genome_shotgun_sequence|gi|422742271|ref|NZ_GL638201.1|	2.867	97.133	1300	44046	45346
Staphylococcus_#_aureus_!_subsp._{_aureus_}_MRSA177_genomic_scaffold_Scfld60_whole_genome_shotgun_sequence|gi|422742955|ref|NZ_GL638212.1|	1.765	98.235	1289	71729	73018
Staphylococcus_#_aureus_!_subsp._{_aureus_}_Btn1260_genomic_scaffold_supercont1.3_whole_genome_shotgun_sequence|gi|282904893|ref|NZ_GG730258.1|	20.679	79.321	1279	4906	6185
Staphylococcus_#_aureus_!_subsp._{_aureus_}_WW2703/97_genomic_scaffold_supercont1.2_whole_genome_shotgun_sequence|gi|282907462|ref|NZ_GG730221.1|	0.38	99.62	1229	322474	323703
Staphylococcus_#_sp._!_HGB0015_{_genomic_}_scaffold_aczIz-supercont1.1_whole_genome_shotgun_sequence|gi|512478017|ref|NZ_KE150417.1|	0.085	99.915	1215	1428549	1429764
Staphylococcus_#_aureus_!_M0270_{_genomic_}_scaffold_acrGX-supercont1.2_whole_genome_shotgun_sequence|gi|487374876|ref|NZ_KB821159.1|	0.201	99.799	1210	599634	600844
Staphylococcus_#_aureus_!_M1010_{_genomic_}_scaffold_acvqt-supercont1.1_whole_genome_shotgun_sequence|gi|486402553|ref|NZ_KB821824.1|	0.083	99.917	1202	1443210	1444412
Staphylococcus_#_aureus_!_M1257_{_genomic_}_scaffold_acumo-supercont1.3_whole_genome_shotgun_sequence|gi|486715789|ref|NZ_KB822127.1|	0.097	99.903	1202	1240437	1241639
Staphylococcus_#_aureus_!_M0528_{_genomic_}_scaffold_acvqo-supercont1.7_whole_genome_shotgun_sequence|gi|486339825|ref|NZ_KB821428.1|	0.182	99.818	1201	659796	660997
Staphylococcus_#_aureus_!_M0628_{_genomic_}_scaffold_acuno-supercont-complete_whole_genome_shotgun_sequence|gi|486412957|ref|NZ_KB821506.1|	0.042	99.958	1201	2827235	2828436
Staphylococcus_#_aureus_!_M0892_{_genomic_}_scaffold_aculW-supercont1.3_whole_genome_shotgun_sequence|gi|487385673|ref|NZ_KB821732.1|	0.098	99.902	1201	1225361	1226562
Staphylococcus_#_aureus_!_M1095_{_genomic_}_scaffold_aculR-supercont1.3_whole_genome_shotgun_sequence|gi|486425960|ref|NZ_KB821981.1|	0.191	99.809	1201	627070	628271
Staphylococcus_#_aureus_!_M1407_{_genomic_}_scaffold_acuod-supercont1.2_whole_genome_shotgun_sequence|gi|487401590|ref|NZ_KB822380.1|	0.143	99.857	1201	840448	841649
Bacillus_#_amyloliquefaciens_!_TA208_{_chromosome_}_complete_genome|gi|384157612|ref|NC_017188.1|	0.03	99.97	1200	3936311	3937511
Bacillus_#_cereus_!_ATCC_{_10987_}_complete_genome|gi|42779081|ref|NC_003909.8|	0.023	99.977	1200	5223083	5224283
Bacillus_#_cereus_!_F837/76_{_chromosome_}_complete_genome|gi|376264031|ref|NC_016779.1|	0.023	99.977	1200	5221706	5222906
Bacillus_#_thuringiensis_!_HD-771_{_chromosome_}_complete_genome|gi|402558824|ref|NC_018500.1|	0.02	99.98	1200	5884836	5886036
Bacillus_#_thuringiensis_!_serovar_{_kurstaki_}_str._HD73_complete_genome|gi|449086670|ref|NC_020238.1|	0.021	99.979	1200	5645599	5646799
Staphylococcus_#_aureus_!_M0375_{_genomic_}_scaffold_acunY-supercont1.6_whole_genome_shotgun_sequence|gi|487366006|ref|NZ_KB821292.1|	0.192	99.808	1200	623845	625045
Staphylococcus_#_aureus_!_M0602_{_genomic_}_scaffold_acvqp-supercont1.4_whole_genome_shotgun_sequence|gi|486359560|ref|NZ_KB821496.1|	0.232	99.768	1200	515601	516801
Staphylococcus_#_aureus_!_M0822_{_genomic_}_scaffold_acunB-supercont1.7_whole_genome_shotgun_sequence|gi|487383827|ref|NZ_KB821686.1|	0.129	99.871	1200	927196	928396
Staphylococcus_#_aureus_!_M0877_{_genomic_}_scaffold_acumt-supercont1.4_whole_genome_shotgun_sequence|gi|487385165|ref|NZ_KB821717.1|	0.687	99.313	1200	173377	174577
Staphylococcus_#_aureus_!_M1109_{_genomic_}_scaffold_acunD-supercont1.9_whole_genome_shotgun_sequence|gi|487395760|ref|NZ_KB822020.1|	2.51	97.49	1200	46611	47811
Staphylococcus_#_aureus_!_subsp._{_aureus_}_TCH130_genomic_scaffold_SCAFFOLD15_whole_genome_shotgun_sequence|gi|255925777|ref|NZ_GG698172.1|	0.841	99.159	1200	141528	142728
Staphylococcus_#_epidermidis_!_BCM-HMP0060_{_genomic_}_scaffold_SCAFFOLD1_whole_genome_shotgun_sequence|gi|254281370|ref|NZ_GG696727.1|	0.132	99.868	1200	906939	908139
Staphylococcus_#_aureus_!_subsp._{_aureus_}_MRSA131_genomic_scaffold_Scfld119_whole_genome_shotgun_sequence|gi|422745916|ref|NZ_GL638179.1|	1.626	98.374	1189	71929	73118
Staphylococcus_#_aureus_!_subsp._{_aureus_}_68-397_genomic_scaffold_supercont1.3_whole_genome_shotgun_sequence|gi|257429933|ref|NZ_GG700576.1|	22.483	77.517	1179	4065	5244
Staphylococcus_#_aureus_!_subsp._{_aureus_}_A017934/97_genomic_scaffold_supercont1.4_whole_genome_shotgun_sequence|gi|283957309|ref|NZ_GG731498.1|	20.551	79.449	1179	4558	5737
Staphylococcus_#_aureus_!_subsp._{_aureus_}_C101_genomic_scaffold_supercont1.4_whole_genome_shotgun_sequence|gi|282923126|ref|NZ_GG730123.1|	21.167	78.833	1179	4391	5570
Staphylococcus_#_aureus_!_subsp._{_aureus_}_C160_genomic_scaffold_supercont1.22_whole_genome_shotgun_sequence|gi|282904834|ref|NZ_GG730294.1|	19.315	80.685	1179	4925	6104
Staphylococcus_#_aureus_!_subsp._{_aureus_}_C427_genomic_scaffold_supercont1.4_whole_genome_shotgun_sequence|gi|282918299|ref|NZ_GG730144.1|	20.99	79.01	1179	4438	5617
Staphylococcus_#_aureus_!_subsp._{_aureus_}_D139_genomic_scaffold_supercont1.8_whole_genome_shotgun_sequence|gi|282915836|ref|NZ_GG730166.1|	22.704	77.296	1179	4014	5193
Staphylococcus_#_aureus_!_subsp._{_aureus_}_E1410_genomic_scaffold_supercont1.4_whole_genome_shotgun_sequence|gi|257432635|ref|NZ_GG700600.1|	21.959	78.041	1179	4190	5369
Staphylococcus_#_aureus_!_subsp._{_aureus_}_M876_genomic_scaffold_supercont1.4_whole_genome_shotgun_sequence|gi|257435539|ref|NZ_GG700617.1|	22.229	77.771	1179	4125	5304
Staphylococcus_#_aureus_!_subsp._{_aureus_}_WW2703/97_genomic_scaffold_supercont1.7_whole_genome_shotgun_sequence|gi|282907840|ref|NZ_GG730226.1|	23.236	76.764	1179	3895	5074
Staphylococcus_#_aureus_!_M0602_{_genomic_}_scaffold_acvqp-supercont1.3_whole_genome_shotgun_sequence|gi|486358833|ref|NZ_KB821495.1|	0.651	99.349	1173	178930	180103
Staphylococcus_#_aureus_!_M0144_{_genomic_}_scaffold_acunq-supercont1.2_whole_genome_shotgun_sequence|gi|487359132|ref|NZ_KB821039.1|	0.179	99.821	1111	620326	621437
Staphylococcus_#_aureus_!_M0799_{_genomic_}_scaffold_acvqq-supercont1.5_whole_genome_shotgun_sequence|gi|486379833|ref|NZ_KB821657.1|	0.182	99.818	1111	608308	609419
Staphylococcus_#_aureus_!_M0045_{_genomic_}_scaffold_acqxU-supercont1.3_whole_genome_shotgun_sequence|gi|486231608|ref|NZ_KB820971.1|	0.049	99.951	1110	2247707	2248817
Staphylococcus_#_aureus_!_M0391_{_genomic_}_scaffold_acqwG-supercont1.6_whole_genome_shotgun_sequence|gi|486291032|ref|NZ_KB821314.1|	0.354	99.646	1110	312030	313140
Staphylococcus_#_aureus_!_B53639_{_genomic_}_scaffold_acqwD-supercont1.4_whole_genome_shotgun_sequence|gi|486323211|ref|NZ_KB822344.1|	0.077	99.923	1101	1423407	1424508
Staphylococcus_#_aureus_!_M0946_{_genomic_}_scaffold_acunJ-supercont1.5_whole_genome_shotgun_sequence|gi|487388055|ref|NZ_KB821790.1|	0.451	99.549	1101	243111	244212
Staphylococcus_#_aureus_!_M0953_{_genomic_}_scaffold_acvql-supercont1.2_whole_genome_shotgun_sequence|gi|486396452|ref|NZ_KB821796.1|	0.077	99.923	1101	1419996	1421097
Staphylococcus_#_aureus_!_M1119_{_genomic_}_scaffold_acunS-supercont1.4_whole_genome_shotgun_sequence|gi|486430799|ref|NZ_KB822028.1|	0.182	99.818	1101	603442	604543
Staphylococcus_#_aureus_!_subsp._{_aureus_}_C101_genomic_scaffold_supercont1.12_whole_genome_shotgun_sequence|gi|282924788|ref|NZ_GG730131.1|	0.463	99.537	1101	236930	238031
Staphylococcus_#_aureus_!_subsp._{_aureus_}_EMRSA16_genomic_scaffold_supercont1.13_whole_genome_shotgun_sequence|gi|295428232|ref|NZ_GG770525.1|	0.466	99.534	1101	234982	236083
Staphylococcus_#_aureus_!_subsp._{_aureus_}_M1015_genomic_scaffold_supercont1.11_whole_genome_shotgun_sequence|gi|293537077|ref|NZ_GG749006.1|	0.462	99.538	1101	237270	238371
Staphylococcus_#_aureus_!_subsp._{_aureus_}_M809_genomic_scaffold_supercont1.14_whole_genome_shotgun_sequence|gi|293510534|ref|NZ_GG749312.1|	0.463	99.537	1101	236599	237700
Bacillus_#_anthracis_!_str._{_'Ames_}_Ancestor'_chromosome_complete_genome|gi|50196905|ref|NC_007530.2|	0.021	99.979	1100	5226319	5227419
Bacillus_#_anthracis_!_str._{_Ames_}_chromosome_complete_genome|gi|30260195|ref|NC_003997.3|	0.021	99.979	1100	5226193	5227293
Bacillus_#_anthracis_!_str._{_Sterne_}_chromosome_complete_genome|gi|49183039|ref|NC_005945.1|	0.021	99.979	1100	5227563	5228663
Staphylococcus_#_aureus_!_M0391_{_genomic_}_scaffold_acqwG-supercont1.7_whole_genome_shotgun_sequence|gi|486291809|ref|NZ_KB821315.1|	0.121	99.879	1100	910339	911439
Staphylococcus_#_aureus_!_M1103_{_genomic_}_scaffold_acump-supercont1.1_whole_genome_shotgun_sequence|gi|486428532|ref|NZ_KB822034.1|	0.056	99.944	1100	1962679	1963779
Staphylococcus_#_aureus_!_M1198_{_genomic_}_scaffold_acumf-supercont1.3_whole_genome_shotgun_sequence|gi|486436221|ref|NZ_KB822053.1|	0.063	99.937	1100	1755181	1756281
Staphylococcus_#_aureus_!_subsp._{_aureus_}_Btn1260_genomic_scaffold_supercont1.4_whole_genome_shotgun_sequence|gi|282904894|ref|NZ_GG730259.1|	0.414	99.586	1100	264902	266002
Staphylococcus_#_aureus_!_subsp._{_aureus_}_D139_genomic_scaffold_supercont1.12_whole_genome_shotgun_sequence|gi|282915991|ref|NZ_GG730170.1|	0.57	99.43	1100	191809	192909
Staphylococcus_#_aureus_!_subsp._{_aureus_}_MRSA177_genomic_scaffold_Scfld406_whole_genome_shotgun_sequence|gi|422744525|ref|NZ_GL638239.1|	1.461	98.539	1100	74169	75269
Staphylococcus_#_aureus_!_subsp._{_aureus_}_ATCC_51811_genomic_scaffold_SCAFFOLD3_whole_genome_shotgun_sequence|gi|297210121|ref|NZ_GG774482.1|	0.844	99.156	1099	129068	130167
Staphylococcus_#_aureus_!_subsp._{_aureus_}_H19_genomic_scaffold_supercont1.5_whole_genome_shotgun_sequence|gi|283769454|ref|NZ_GG730339.1|	20.011	79.989	1079	4313	5392
Staphylococcus_#_aureus_!_subsp._{_aureus_}_WBG10049_genomic_scaffold_supercont1.2_whole_genome_shotgun_sequence|gi|282910156|ref|NZ_GG730209.1|	19.956	80.044	1079	4328	5407
Staphylococcus_#_aureus_!_M0210_{_genomic_}_scaffold_acqwt-supercont1.1_whole_genome_shotgun_sequence|gi|487373279|ref|NZ_KB821105.1|	0.047	99.953	1075	2283813	2284888
Staphylococcus_#_lugdunensis_!_ACS-027-V-Sch2_{_genomic_}_scaffold_supercont1.3_whole_genome_shotgun_sequence|gi|448879135|ref|NZ_KB373324.1|	0.3	99.7	1058	351866	352924
Staphylococcus_#_aureus_!_subsp._{_aureus_}_MRSA177_genomic_scaffold_Scfld78_whole_genome_shotgun_sequence|gi|422743378|ref|NZ_GL638219.1|	4.599	95.401	1051	21800	22851
Staphylococcus_#_aureus_!_M0102_{_genomic_}_scaffold_acqwC-supercont1.4_whole_genome_shotgun_sequence|gi|486240581|ref|NZ_KB821009.1|	0.073	99.927	1001	1375037	1376038
Staphylococcus_#_aureus_!_M0273_{_genomic_}_scaffold_acqxR-supercont1.4_whole_genome_shotgun_sequence|gi|487375558|ref|NZ_KB821170.1|	0.118	99.882	1001	844650	845651
Staphylococcus_#_aureus_!_M0622_{_genomic_}_scaffold_acvqA-supercont1.3_whole_genome_shotgun_sequence|gi|486362492|ref|NZ_KB821504.1|	0.05	99.95	1001	1989035	1990036
Staphylococcus_#_aureus_!_M1275_{_genomic_}_scaffold_acumX-supercont1.5_whole_genome_shotgun_sequence|gi|487397737|ref|NZ_KB822134.1|	0.043	99.957	1001	2311042	2312043
Staphylococcus_#_aureus_!_M1320_{_genomic_}_scaffold_acumx-supercont1.1_whole_genome_shotgun_sequence|gi|486868496|ref|NZ_KB822182.1|	0.069	99.931	1001	1450140	1451141
Staphylococcus_#_aureus_!_M1521_{_genomic_}_scaffold_acunr-supercont1.3_whole_genome_shotgun_sequence|gi|487137370|ref|NZ_KB822270.1|	0.166	99.834	1001	603260	604261
Staphylococcus_#_aureus_!_subsp._{_aureus_}_68-397_genomic_scaffold_supercont1.11_whole_genome_shotgun_sequence|gi|257431076|ref|NZ_GG700584.1|	0.44	99.56	1001	226395	227396
Staphylococcus_#_aureus_!_subsp._{_aureus_}_TCH130_genomic_scaffold_SCAFFOLD8_whole_genome_shotgun_sequence|gi|255925770|ref|NZ_GG698165.1|	0.731	99.269	1001	135944	136945
Bacillus_#_amyloliquefaciens_!_IT-45_{_complete_}_genome|gi|451344759|ref|NC_020272.1|	0.025	99.975	1000	3927857	3928857
Bacillus_#_amyloliquefaciens_!_subsp._{_plantarum_}_CAU_B946_complete_genome|gi|375360690|ref|NC_016784.1|	0.025	99.975	1000	4018861	4019861
Bacillus_#_amyloliquefaciens_!_subsp._{_plantarum_}_UCMB5036_complete_genome|gi|452854062|ref|NC_020410.1|	0.026	99.974	1000	3909324	3910324
Bacillus_#_anthracis_!_str._{_H9401_}_chromosome_complete_genome|gi|386733873|ref|NC_017729.1|	0.019	99.981	1000	5217947	5218947
Bacillus_#_cereus_!_BAG2O-2_{_genomic_}_scaffold_supercont1.1_whole_genome_shotgun_sequence|gi|514983440|ref|NZ_KE332507.1|	0.019	99.981	1000	5275309	5276309
Bacillus_#_cereus_!_MC67_{_genomic_}_scaffold_supercont1.1_whole_genome_shotgun_sequence|gi|423554795|ref|NZ_JH792113.1|	0.036	99.964	1000	2808659	2809659
Bacillus_#_subtilis_!_QB928_{_chromosome_}_complete_genome|gi|402774243|ref|NC_018520.1|	0.024	99.976	1000	4145839	4146839
Bacillus_#_subtilis_!_subsp._{_subtilis_}_6051-HGW_complete_genome|gi|470160151|ref|NC_020507.1|	0.024	99.976	1000	4214610	4215610
Staphylococcus_#_aureus_!_M0529_{_genomic_}_scaffold_acumA-supercont1.3_whole_genome_shotgun_sequence|gi|486414273|ref|NZ_KB821433.1|	0.215	99.785	1000	464261	465261
Staphylococcus_#_aureus_!_M0584_{_genomic_}_scaffold_acunu-supercont1.3_whole_genome_shotgun_sequence|gi|487371238|ref|NZ_KB821491.1|	0.087	99.913	1000	1149375	1150375
Staphylococcus_#_aureus_!_subsp._{_aureus_}_68-397_genomic_scaffold_supercont1.5_whole_genome_shotgun_sequence|gi|257430207|ref|NZ_GG700578.1|	0.768	99.232	1000	129205	130205
Staphylococcus_#_aureus_!_subsp._{_aureus_}_D139_genomic_scaffold_supercont1.3_whole_genome_shotgun_sequence|gi|282915419|ref|NZ_GG730161.1|	0.45	99.55	999	220831	221830
Staphylococcus_#_aureus_!_subsp._{_aureus_}_C101_genomic_scaffold_supercont1.17_whole_genome_shotgun_sequence|gi|282925449|ref|NZ_GG730136.1|	0.901	99.099	990	108846	109836
Staphylococcus_#_aureus_!_subsp._{_aureus_}_WW2703/97_genomic_scaffold_supercont1.29_whole_genome_shotgun_sequence|gi|282909374|ref|NZ_GG730248.1|	0.874	99.126	990	112238	113228
Staphylococcus_#_aureus_!_M1036_{_genomic_}_scaffold_acvqI-supercont1.4_whole_genome_shotgun_sequence|gi|486407993|ref|NZ_KB821865.1|	0.156	99.844	975	623814	624789
Staphylococcus_#_aureus_!_M1109_{_genomic_}_scaffold_acunD-supercont1.10_whole_genome_shotgun_sequence|gi|487395159|ref|NZ_KB822008.1|	0.11	99.89	974	888184	889158
Staphylococcus_#_aureus_!_M0045_{_genomic_}_scaffold_acqxU-supercont1.4_whole_genome_shotgun_sequence|gi|486232687|ref|NZ_KB820972.1|	0.586	99.414	973	165167	166140
Staphylococcus_#_aureus_!_M0695_{_genomic_}_scaffold_acunx-supercont1.7_whole_genome_shotgun_sequence|gi|489045046|ref|NZ_KB821612.1|	4.651	95.349	951	19495	20446
Staphylococcus_#_aureus_!_M0415_{_genomic_}_scaffold_acrGP-supercont1.2_whole_genome_shotgun_sequence|gi|487379162|ref|NZ_KB821318.1|	0.151	99.849	911	601243	602154
Staphylococcus_#_aureus_!_M1244_{_genomic_}_scaffold_acumu-supercont1.5_whole_genome_shotgun_sequence|gi|487397082|ref|NZ_KB822094.1|	0.148	99.852	911	612602	613513
Staphylococcus_#_aureus_!_M0280_{_genomic_}_scaffold_acunT-supercont1.5_whole_genome_shotgun_sequence|gi|487362514|ref|NZ_KB821185.1|	0.357	99.643	910	253808	254718
Staphylococcus_#_aureus_!_M0687_{_genomic_}_scaffold_acvqC-supercont1.8_whole_genome_shotgun_sequence|gi|486367392|ref|NZ_KB821584.1|	0.097	99.903	910	938481	939391
Staphylococcus_#_aureus_!_M0823_{_genomic_}_scaffold_acvqk-supercont1.5_whole_genome_shotgun_sequence|gi|486382905|ref|NZ_KB821695.1|	0.347	99.653	910	261260	262170
Staphylococcus_#_aureus_!_M0237_{_genomic_}_scaffold_acrHd-supercont1.4_whole_genome_shotgun_sequence|gi|486261514|ref|NZ_KB821136.1|	0.1	99.9	902	904837	905739
Staphylococcus_#_aureus_!_B40723_{_genomic_}_scaffold_acqwm-supercont1.7_whole_genome_shotgun_sequence|gi|486327730|ref|NZ_KB822333.1|	0.063	99.937	901	1424383	1425284
Staphylococcus_#_aureus_!_M0154_{_genomic_}_scaffold_acumB-supercont1.8_whole_genome_shotgun_sequence|gi|487359822|ref|NZ_KB821052.1|	0.063	99.937	901	1437066	1437967
Staphylococcus_#_aureus_!_M0408_{_genomic_}_scaffold_acrHk-supercont1.3_whole_genome_shotgun_sequence|gi|486295120|ref|NZ_KB821328.1|	0.521	99.479	901	171895	172796
Staphylococcus_#_aureus_!_M0493_{_genomic_}_scaffold_acqwN-supercont1.3_whole_genome_shotgun_sequence|gi|487380377|ref|NZ_KB821403.1|	0.062	99.938	901	1442520	1443421
Staphylococcus_#_aureus_!_M0998_{_genomic_}_scaffold_acvqv-supercont1.1_whole_genome_shotgun_sequence|gi|486398090|ref|NZ_KB821813.1|	0.062	99.938	901	1454326	1455227
Staphylococcus_#_aureus_!_M1015_{_genomic_}_scaffold_acvqH-supercont1.3_whole_genome_shotgun_sequence|gi|486404102|ref|NZ_KB821836.1|	0.334	99.666	901	268910	269811
Staphylococcus_#_aureus_!_M1092_{_genomic_}_scaffold_acunK-supercont1.4_whole_genome_shotgun_sequence|gi|486422720|ref|NZ_KB821960.1|	0.083	99.917	901	1087781	1088682
Bacillus_#_amyloliquefaciens_!_FZB42_{_complete_}_genome|gi|154684518|ref|NC_009725.1|	0.023	99.977	900	3917689	3918589
Bacillus_#_subtilis_!_XF-1_{_complete_}_genome|gi|449092714|ref|NC_020244.1|	0.022	99.978	900	4060286	4061186
Clostridium_#_botulinum_!_BKT015925_{_chromosome_}_complete_genome|gi|331268188|ref|NC_015425.1|	0.032	99.968	900	2772257	2773157
Clostridium_#_botulinum_!_H04402_{_065_}_complete_genome|gi|387816237|ref|NC_017299.1|	0.023	99.977	900	3918840	3919740
Staphylococcus_#_aureus_!_M0173_{_genomic_}_scaffold_acrHj-supercont1.1_whole_genome_shotgun_sequence|gi|486253298|ref|NZ_KB821070.1|	0.05	99.95	900	1785517	1786417
Staphylococcus_#_aureus_!_M0240_{_genomic_}_scaffold_acqwO-supercont1.6_whole_genome_shotgun_sequence|gi|487374423|ref|NZ_KB821150.1|	0.146	99.854	900	615456	616356
Staphylococcus_#_aureus_!_M0252_{_genomic_}_scaffold_acqxE-supercont1.1_whole_genome_shotgun_sequence|gi|486266332|ref|NZ_KB821139.1|	0.032	99.968	900	2771788	2772688
Staphylococcus_#_aureus_!_M0280_{_genomic_}_scaffold_acunT-supercont1.8_whole_genome_shotgun_sequence|gi|487362733|ref|NZ_KB821188.1|	0.053	99.947	900	1711226	1712126
Staphylococcus_#_aureus_!_M0329_{_genomic_}_scaffold_acrHa-supercont1.6_whole_genome_shotgun_sequence|gi|486274654|ref|NZ_KB821230.1|	0.112	99.888	900	801714	802614
Staphylococcus_#_aureus_!_M0375_{_genomic_}_scaffold_acunY-supercont1.4_whole_genome_shotgun_sequence|gi|487365933|ref|NZ_KB821290.1|	0.247	99.753	900	364102	365002
Staphylococcus_#_aureus_!_M0529_{_genomic_}_scaffold_acumA-supercont1.4_whole_genome_shotgun_sequence|gi|486414553|ref|NZ_KB821434.1|	0.192	99.808	900	467407	468307
Staphylococcus_#_aureus_!_M0900_{_genomic_}_scaffold_acunz-supercont1.5_whole_genome_shotgun_sequence|gi|487386253|ref|NZ_KB821743.1|	0.151	99.849	900	597081	597981
Staphylococcus_#_aureus_!_M0999_{_genomic_}_scaffold_acvqG-supercont1.3_whole_genome_shotgun_sequence|gi|486399931|ref|NZ_KB821822.1|	0.098	99.902	900	914366	915266
Staphylococcus_#_aureus_!_M1407_{_genomic_}_scaffold_acuod-supercont1.3_whole_genome_shotgun_sequence|gi|487401610|ref|NZ_KB822381.1|	0.24	99.76	900	373921	374821
Staphylococcus_#_aureus_!_M1481_{_genomic_}_scaffold_aculQ-supercont1.4_whole_genome_shotgun_sequence|gi|487136766|ref|NZ_KB822251.1|	0.064	99.936	900	1414115	1415015
Staphylococcus_#_aureus_!_subsp._{_aureus_}_58-424_genomic_scaffold_supercont1.13_whole_genome_shotgun_sequence|gi|293507733|ref|NZ_GG749066.1|	0.523	99.477	900	171301	172201
Staphylococcus_#_aureus_!_subsp._{_aureus_}_C427_genomic_scaffold_supercont1.11_whole_genome_shotgun_sequence|gi|282919625|ref|NZ_GG730151.1|	0.468	99.532	900	191229	192129
Staphylococcus_#_aureus_!_subsp._{_aureus_}_MRSA131_genomic_scaffold_Scfld121_whole_genome_shotgun_sequence|gi|422745993|ref|NZ_GL638180.1|	4.621	95.379	900	18575	19475
Staphylococcus_#_aureus_!_subsp._{_aureus_}_MRSA177_genomic_scaffold_Scfld61_whole_genome_shotgun_sequence|gi|422743031|ref|NZ_GL638213.1|	1.658	98.342	900	53368	54268
Staphylococcus_#_aureus_!_subsp._{_aureus_}_WW2703/97_genomic_scaffold_supercont1.14_whole_genome_shotgun_sequence|gi|282908455|ref|NZ_GG730233.1|	0.535	99.465	900	167214	168114
Staphylococcus_#_aureus_!_M1244_{_genomic_}_scaffold_acumu-supercont1.8_whole_genome_shotgun_sequence|gi|487397170|ref|NZ_KB822097.1|	0.185	99.815	899	485539	486438
Staphylococcus_#_aureus_!_subsp._{_aureus_}_55/2053_genomic_scaffold_supercont1.15_whole_genome_shotgun_sequence|gi|257426198|ref|NZ_GG700547.1|	0.807	99.193	890	109382	110272
Staphylococcus_#_aureus_!_subsp._{_aureus_}_58-424_genomic_scaffold_supercont1.17_whole_genome_shotgun_sequence|gi|293508980|ref|NZ_GG749070.1|	0.807	99.193	890	109352	110242
Staphylococcus_#_aureus_!_subsp._{_aureus_}_65-1322_genomic_scaffold_supercont1.10_whole_genome_shotgun_sequence|gi|257428858|ref|NZ_GG700568.1|	0.812	99.188	890	108758	109648
Staphylococcus_#_aureus_!_subsp._{_aureus_}_68-397_genomic_scaffold_supercont1.15_whole_genome_shotgun_sequence|gi|257431468|ref|NZ_GG700588.1|	0.815	99.185	890	108344	109234
Staphylococcus_#_aureus_!_subsp._{_aureus_}_A017934/97_genomic_scaffold_supercont1.15_whole_genome_shotgun_sequence|gi|283958840|ref|NZ_GG731509.1|	0.799	99.201	890	110568	111458
Staphylococcus_#_aureus_!_subsp._{_aureus_}_Btn1260_genomic_scaffold_supercont1.11_whole_genome_shotgun_sequence|gi|282906406|ref|NZ_GG730266.1|	0.8	99.2	890	110321	111211
Staphylococcus_#_aureus_!_subsp._{_aureus_}_C160_genomic_scaffold_supercont1.21_whole_genome_shotgun_sequence|gi|282904727|ref|NZ_GG730293.1|	0.796	99.204	890	110921	111811
Staphylococcus_#_aureus_!_subsp._{_aureus_}_C427_genomic_scaffold_supercont1.15_whole_genome_shotgun_sequence|gi|282920237|ref|NZ_GG730155.1|	0.814	99.186	890	108512	109402
Staphylococcus_#_aureus_!_subsp._{_aureus_}_E1410_genomic_scaffold_supercont1.15_whole_genome_shotgun_sequence|gi|257434178|ref|NZ_GG700611.1|	0.817	99.183	890	108107	108997
Staphylococcus_#_aureus_!_subsp._{_aureus_}_EMRSA16_genomic_scaffold_supercont1.16_whole_genome_shotgun_sequence|gi|295428648|ref|NZ_GG770528.1|	0.789	99.211	890	111886	112776
Staphylococcus_#_aureus_!_subsp._{_aureus_}_M1015_genomic_scaffold_supercont1.16_whole_genome_shotgun_sequence|gi|293547492|ref|NZ_GG749011.1|	0.812	99.188	890	108760	109650
Staphylococcus_#_aureus_!_subsp._{_aureus_}_M809_genomic_scaffold_supercont1.20_whole_genome_shotgun_sequence|gi|293510892|ref|NZ_GG749318.1|	0.816	99.184	890	108216	109106
Staphylococcus_#_aureus_!_subsp._{_aureus_}_M876_genomic_scaffold_supercont1.13_whole_genome_shotgun_sequence|gi|257437091|ref|NZ_GG700626.1|	0.813	99.187	890	108638	109528
Staphylococcus_#_aureus_!_subsp._{_aureus_}_M899_genomic_scaffold_supercont1.14_whole_genome_shotgun_sequence|gi|282914906|ref|NZ_GG730203.1|	0.817	99.183	890	108076	108966
Staphylococcus_#_aureus_!_subsp._{_aureus_}_WBG10049_genomic_scaffold_supercont1.8_whole_genome_shotgun_sequence|gi|282911628|ref|NZ_GG730215.1|	0.814	99.186	890	108407	109297
Staphylococcus_#_epidermidis_!_M23864:W2(grey)_{_genomic_}_scaffold_SCAFFOLD1_whole_genome_shotgun_sequence|gi|293368503|ref|NZ_GG749255.1|	0.052	99.948	870	1664819	1665689
Staphylococcus_#_aureus_!_subsp._{_aureus_}_MRSA177_genomic_scaffold_Scfld56_whole_genome_shotgun_sequence|gi|422742934|ref|NZ_GL638211.1|	4.541	95.459	865	18184	19049
Staphylococcus_#_hominis_!_subsp._{_hominis_}_C80_genomic_scaffold_supercont1.5_whole_genome_shotgun_sequence|gi|314935894|ref|NZ_GL545256.1|	13.667	86.333	858	5420	6278
Staphylococcus_#_aureus_!_subsp._{_aureus_}_TCH130_genomic_scaffold_SCAFFOLD9_whole_genome_shotgun_sequence|gi|255925771|ref|NZ_GG698166.1|	0.8	99.2	829	102764	103593
Staphylococcus_#_epidermidis_!_M23864:W2(grey)_{_genomic_}_scaffold_SCAFFOLD4_whole_genome_shotgun_sequence|gi|293368506|ref|NZ_GG749258.1|	15.509	84.491	813	4429	5242
Staphylococcus_#_epidermidis_!_W23144_{_genomic_}_scaffold_SCAFFOLD9_whole_genome_shotgun_sequence|gi|254212927|ref|NZ_GG696807.1|	16.182	83.818	813	4211	5024
Staphylococcus_#_aureus_!_M0213_{_genomic_}_scaffold_acqwL-supercont1.3_whole_genome_shotgun_sequence|gi|487373880|ref|NZ_KB821117.1|	0.056	99.944	801	1428088	1428889
Staphylococcus_#_aureus_!_M0216_{_genomic_}_scaffold_acumr-supercont1.1_whole_genome_shotgun_sequence|gi|487361292|ref|NZ_KB821119.1|	0.056	99.944	801	1436782	1437583
Staphylococcus_#_aureus_!_M0364_{_genomic_}_scaffold_acqwM-supercont1.3_whole_genome_shotgun_sequence|gi|486287226|ref|NZ_KB821266.1|	0.065	99.935	801	1226314	1227115
Staphylococcus_#_aureus_!_M0460_{_genomic_}_scaffold_acqxK-supercont1.2_whole_genome_shotgun_sequence|gi|487379866|ref|NZ_KB821364.1|	0.075	99.925	801	1070605	1071406
Staphylococcus_#_aureus_!_M0943_{_genomic_}_scaffold_acvqw-supercont1.3_whole_genome_shotgun_sequence|gi|486391432|ref|NZ_KB821767.1|	0.077	99.923	801	1040750	1041551
Staphylococcus_#_aureus_!_M1095_{_genomic_}_scaffold_aculR-supercont1.4_whole_genome_shotgun_sequence|gi|486426334|ref|NZ_KB821982.1|	0.126	99.874	801	634886	635687
Staphylococcus_#_aureus_!_M1450_{_genomic_}_scaffold_acumw-supercont1.7_whole_genome_shotgun_sequence|gi|487135036|ref|NZ_KB822238.1|	0.057	99.943	801	1406161	1406962
Staphylococcus_#_aureus_!_subsp._{_aureus_}_M1015_genomic_scaffold_supercont1.7_whole_genome_shotgun_sequence|gi|293526792|ref|NZ_GG749002.1|	0.809	99.191	801	98191	98992
Staphylococcus_#_aureus_!_subsp._{_aureus_}_M809_genomic_scaffold_supercont1.23_whole_genome_shotgun_sequence|gi|293511188|ref|NZ_GG749321.1|	0.434	99.566	801	183783	184584
Bacillus_#_cereus_!_BAG6X1-1_{_genomic_}_scaffold_supercont1.1_whole_genome_shotgun_sequence|gi|423474542|ref|NZ_JH804637.1|	0.016	99.984	800	4986854	4987654
Bacillus_#_subtilis_!_subsp._{_spizizenii_}_str._W23_chromosome_complete_genome|gi|305672698|ref|NC_014479.1|	0.02	99.98	800	4026876	4027676
Carnobacterium_#_sp._!_17-4_{_chromosome_}_complete_genome|gi|328956382|ref|NC_015391.1|	0.03	99.97	800	2634494	2635294
Geobacillus_#_sp._!_Y412MC61_{_chromosome_}_complete_genome|gi|261417500|ref|NC_013411.1|	0.022	99.978	800	3622044	3622844
Staphylococcus_#_aureus_!_B40950_{_genomic_}_scaffold_acqwJ-supercont1.4_whole_genome_shotgun_sequence|gi|486330251|ref|NZ_KB822339.1|	0.088	99.912	800	909733	910533
Staphylococcus_#_aureus_!_M0006_{_genomic_}_scaffold_aculO-supercont1.6_whole_genome_shotgun_sequence|gi|487258816|ref|NZ_KB820958.1|	0.22	99.78	800	362056	362856
Staphylococcus_#_aureus_!_M0060_{_genomic_}_scaffold_acrGU-supercont1.4_whole_genome_shotgun_sequence|gi|487336408|ref|NZ_KB820987.1|	0.176	99.824	800	452804	453604
Staphylococcus_#_aureus_!_M0270_{_genomic_}_scaffold_acrGX-supercont1.4_whole_genome_shotgun_sequence|gi|487374936|ref|NZ_KB821161.1|	0.492	99.508	800	161906	162706
Staphylococcus_#_aureus_!_M0374_{_genomic_}_scaffold_aculK-supercont1.3_whole_genome_shotgun_sequence|gi|487365551|ref|NZ_KB821280.1|	0.05	99.95	800	1590851	1591651
Staphylococcus_#_aureus_!_M0391_{_genomic_}_scaffold_acqwG-supercont1.8_whole_genome_shotgun_sequence|gi|486292280|ref|NZ_KB821316.1|	0.349	99.651	800	228473	229273
Staphylococcus_#_aureus_!_M1563_{_genomic_}_scaffold_acuoe-supercont1.1_whole_genome_shotgun_sequence|gi|487146604|ref|NZ_KB822304.1|	0.113	99.887	800	707416	708216
Staphylococcus_#_aureus_!_M1563_{_genomic_}_scaffold_acuoe-supercont1.5_whole_genome_shotgun_sequence|gi|487162436|ref|NZ_KB822308.1|	0.211	99.789	800	378201	379001
Staphylococcus_#_aureus_!_subsp._{_aureus_}_E1410_genomic_scaffold_supercont1.14_whole_genome_shotgun_sequence|gi|257433992|ref|NZ_GG700610.1|	0.466	99.534	800	170808	171608
Staphylococcus_#_aureus_!_subsp._{_aureus_}_MRSA131_genomic_scaffold_Scfld13_whole_genome_shotgun_sequence|gi|422744965|ref|NZ_GL638164.1|	2.242	97.758	800	34877	35677
Staphylococcus_#_aureus_!_subsp._{_aureus_}_MRSA177_genomic_scaffold_Scfld63_whole_genome_shotgun_sequence|gi|422743087|ref|NZ_GL638214.1|	2.242	97.758	800	34877	35677
Staphylococcus_#_aureus_!_HI168_{_genomic_}_scaffold_acqxp-supercont1.2_whole_genome_shotgun_sequence|gi|486212564|ref|NZ_KB820920.1|	1.79	98.21	739	40555	41294
Staphylococcus_#_aureus_!_M1007_{_genomic_}_scaffold_acvqZ-supercont1.2_whole_genome_shotgun_sequence|gi|486400600|ref|NZ_KB821830.1|	1.708	98.292	739	42516	43255
Staphylococcus_#_aureus_!_subsp._{_aureus_}_M809_genomic_scaffold_supercont1.6_whole_genome_shotgun_sequence|gi|293509336|ref|NZ_GG749304.1|	23.112	76.888	713	2372	3085
Staphylococcus_#_epidermidis_!_BCM-HMP0060_{_genomic_}_scaffold_SCAFFOLD5_whole_genome_shotgun_sequence|gi|254281374|ref|NZ_GG696731.1|	13.796	86.204	713	4455	5168
Staphylococcus_#_aureus_!_M0648_{_genomic_}_scaffold_acunl-supercont1.5_whole_genome_shotgun_sequence|gi|487381151|ref|NZ_KB821526.1|	0.288	99.712	710	245641	246351
Staphylococcus_#_aureus_!_subsp._{_aureus_}_M809_genomic_scaffold_supercont1.22_whole_genome_shotgun_sequence|gi|293510998|ref|NZ_GG749320.1|	0.41	99.59	702	170552	171254
Staphylococcus_#_aureus_!_B40950_{_genomic_}_scaffold_acqwJ-supercont1.2_whole_genome_shotgun_sequence|gi|486329675|ref|NZ_KB822337.1|	0.052	99.948	701	1348126	1348827
Staphylococcus_#_aureus_!_M0104_{_genomic_}_scaffold_acrHp-supercont1.1_whole_genome_shotgun_sequence|gi|487372340|ref|NZ_KB821023.1|	0.054	99.946	701	1295200	1295901
Staphylococcus_#_aureus_!_M0351_{_genomic_}_scaffold_acunV-supercont1.7_whole_genome_shotgun_sequence|gi|487364468|ref|NZ_KB821261.1|	0.049	99.951	701	1436130	1436831
Staphylococcus_#_aureus_!_M0580_{_genomic_}_scaffold_acvrg-supercont1.1_whole_genome_shotgun_sequence|gi|486356325|ref|NZ_KB821486.1|	0.051	99.949	701	1366734	1367435
Staphylococcus_#_aureus_!_M0673_{_genomic_}_scaffold_acumv-supercont1.3_whole_genome_shotgun_sequence|gi|487382473|ref|NZ_KB821564.1|	0.086	99.914	701	818959	819660
Staphylococcus_#_aureus_!_M1481_{_genomic_}_scaffold_aculQ-supercont1.2_whole_genome_shotgun_sequence|gi|487136608|ref|NZ_KB822249.1|	0.066	99.934	701	1061129	1061830
Staphylococcus_#_aureus_!_M1533_{_genomic_}_scaffold_aculS-supercont1.2_whole_genome_shotgun_sequence|gi|487138257|ref|NZ_KB822286.1|	0.05	99.95	701	1401465	1402166
Anoxybacillus_#_flavithermus_!_TNO-09.006_{_genomic_}_scaffold_chrAF6_whole_genome_shotgun_sequence|gi|440214640|ref|NZ_KB205935.1|	0.026	99.974	700	2657725	2658425
Bacillus_#_cereus_!_BAG2O-3_{_genomic_}_scaffold_acfXF-supercont1.1_whole_genome_shotgun_sequence|gi|507017505|ref|NZ_KB976530.1|	0.013	99.987	700	5327309	5328009
Bacillus_#_cereus_!_MSX-D12_{_genomic_}_scaffold_supercont1.1_whole_genome_shotgun_sequence|gi|423572779|ref|NZ_JH792018.1|	0.013	99.987	700	5224400	5225100
Bacillus_#_cereus_!_VD078_{_genomic_}_scaffold_supercont1.1_whole_genome_shotgun_sequence|gi|423597198|ref|NZ_JH792251.1|	0.014	99.986	700	5171341	5172041
Bacillus_#_cereus_!_VD200_{_genomic_}_scaffold_supercont1.1_whole_genome_shotgun_sequence|gi|423653012|ref|NZ_JH791819.1|	0.013	99.987	700	5473120	5473820
Bacillus_#_licheniformis_!_WX-02_{_genomic_}_scaffold_MUY_1_whole_genome_shotgun_sequence|gi|423680240|ref|NZ_JH636050.1|	0.017	99.983	700	4193147	4193847
Geobacillus_#_sp._!_GHH01_{_complete_}_genome|gi|448236310|ref|NC_020210.1|	0.02	99.98	700	3582434	3583134
Lactobacillus_#_sakei_!_subsp._{_sakei_}_23K_chromosome_complete_genome|gi|81427616|ref|NC_007576.1|	0.037	99.963	700	1883961	1884661
Lactobacillus_#_salivarius_!_CECT_{_5713_}_chromosome_complete_genome|gi|385839818|ref|NC_017481.1|	0.038	99.962	700	1827469	1828169
Oceanobacillus_#_iheyensis_!_HTE831_{_chromosome_}_complete_genome|gi|23097455|ref|NC_004193.1|	0.019	99.981	700	3629828	3630528
Pediococcus_#_pentosaceus_!_ATCC_{_25745_}_complete_genome|gi|116491818|ref|NC_008525.1|	0.038	99.962	700	1831687	1832387
Staphylococcus_#_aureus_!_M0001_{_genomic_}_scaffold_acrHn-supercont1.15_whole_genome_shotgun_sequence|gi|486217883|ref|NZ_KB820933.1|	2.559	97.441	700	26651	27351
Staphylococcus_#_aureus_!_M0075_{_genomic_}_scaffold_acunI-supercont1.4_whole_genome_shotgun_sequence|gi|487399870|ref|NZ_KB822350.1|	0.04	99.96	700	1758216	1758916
Staphylococcus_#_aureus_!_M0102_{_genomic_}_scaffold_acqwC-supercont1.5_whole_genome_shotgun_sequence|gi|486240844|ref|NZ_KB821010.1|	0.389	99.611	700	179399	180099
Staphylococcus_#_aureus_!_M0216_{_genomic_}_scaffold_acumr-supercont1.3_whole_genome_shotgun_sequence|gi|487361486|ref|NZ_KB821121.1|	0.049	99.951	700	1418976	1419676
Staphylococcus_#_aureus_!_M0237_{_genomic_}_scaffold_acrHd-supercont1.2_whole_genome_shotgun_sequence|gi|486261107|ref|NZ_KB821134.1|	0.13	99.87	700	537038	537738
Staphylococcus_#_aureus_!_M0240_{_genomic_}_scaffold_acqwO-supercont1.9_whole_genome_shotgun_sequence|gi|487374622|ref|NZ_KB821153.1|	0.294	99.706	700	237458	238158
Staphylococcus_#_aureus_!_M0270_{_genomic_}_scaffold_acrGX-supercont1.5_whole_genome_shotgun_sequence|gi|487374986|ref|NZ_KB821162.1|	0.208	99.792	700	335043	335743
Staphylococcus_#_aureus_!_M0294_{_genomic_}_scaffold_acumG-supercont1.5_whole_genome_shotgun_sequence|gi|487400107|ref|NZ_KB822357.1|	0.158	99.842	700	441901	442601
Staphylococcus_#_aureus_!_M0676_{_genomic_}_scaffold_acvqP-supercont1.2_whole_genome_shotgun_sequence|gi|486363747|ref|NZ_KB821572.1|	0.107	99.893	700	652891	653591
Staphylococcus_#_aureus_!_M0946_{_genomic_}_scaffold_acunJ-supercont1.7_whole_genome_shotgun_sequence|gi|487388174|ref|NZ_KB821792.1|	0.662	99.338	700	105027	105727
Staphylococcus_#_aureus_!_M0994_{_genomic_}_scaffold_acunc-supercont1.3_whole_genome_shotgun_sequence|gi|487390907|ref|NZ_KB821811.1|	0.041	99.959	700	1689388	1690088
Staphylococcus_#_aureus_!_M1063_{_genomic_}_scaffold_acumZ-supercont1.4_whole_genome_shotgun_sequence|gi|486416208|ref|NZ_KB821906.1|	0.043	99.957	700	1645362	1646062
Staphylococcus_#_aureus_!_M1109_{_genomic_}_scaffold_acunD-supercont1.3_whole_genome_shotgun_sequence|gi|487395342|ref|NZ_KB822014.1|	0.044	99.956	700	1585327	1586027
Staphylococcus_#_aureus_!_M1244_{_genomic_}_scaffold_acumu-supercont1.3_whole_genome_shotgun_sequence|gi|487397020|ref|NZ_KB822092.1|	0.41	99.59	700	170155	170855
Staphylococcus_#_aureus_!_M1321_{_genomic_}_scaffold_acunh-supercont1.4_whole_genome_shotgun_sequence|gi|486915382|ref|NZ_KB822194.1|	0.194	99.806	700	359811	360511
Staphylococcus_#_aureus_!_M1451_{_genomic_}_scaffold_acunE-supercont1.5_whole_genome_shotgun_sequence|gi|480459573|ref|NZ_KB822245.1|	0.077	99.923	700	909057	909757
Staphylococcus_#_aureus_!_subsp._{_aureus_}_MRSA131_genomic_scaffold_Scfld44_whole_genome_shotgun_sequence|gi|422745064|ref|NZ_GL638168.1|	1.249	98.751	700	55360	56060
Streptococcus_#_gallolyticus_!_subsp._{_gallolyticus_}_ATCC_BAA-2069_complete_genome|gi|325977200|ref|NC_015215.1|	0.03	99.97	700	2355744	2356444
Staphylococcus_#_aureus_!_M1286_{_genomic_}_scaffold_acuob-supercont1.4_whole_genome_shotgun_sequence|gi|487398182|ref|NZ_KB822150.1|	0.115	99.885	675	584959	585634
Staphylococcus_#_epidermidis_!_W23144_{_genomic_}_scaffold_SCAFFOLD5_whole_genome_shotgun_sequence|gi|254212923|ref|NZ_GG696803.1|	0.278	99.722	670	240172	240842
Staphylococcus_#_aureus_!_M0493_{_genomic_}_scaffold_acqwN-supercont1.2_whole_genome_shotgun_sequence|gi|487380256|ref|NZ_KB821402.1|	0.047	99.953	657	1400854	1401511
Staphylococcus_#_epidermidis_!_M23864:W1_{_genomic_}_scaffold_SCAFFOLD5_whole_genome_shotgun_sequence|gi|254213015|ref|NZ_GG696777.1|	11.889	88.111	613	4543	5156
Staphylococcus_#_aureus_!_M0077_{_genomic_}_scaffold_acunP-supercont1.5_whole_genome_shotgun_sequence|gi|487350224|ref|NZ_KB821003.1|	0.236	99.764	610	258370	258980
Staphylococcus_#_aureus_!_M0294_{_genomic_}_scaffold_acumG-supercont1.1_whole_genome_shotgun_sequence|gi|487400027|ref|NZ_KB822352.1|	0.044	99.956	610	1376584	1377194
Staphylococcus_#_aureus_!_M0663_{_genomic_}_scaffold_acuoc-supercont1.5_whole_genome_shotgun_sequence|gi|487382076|ref|NZ_KB821556.1|	0.247	99.753	610	245889	246499
Staphylococcus_#_aureus_!_M1063_{_genomic_}_scaffold_acumZ-supercont1.7_whole_genome_shotgun_sequence|gi|486416636|ref|NZ_KB821909.1|	0.249	99.751	610	243904	244514
Staphylococcus_#_aureus_!_M0330_{_genomic_}_scaffold_acqxt-supercont1.2_whole_genome_shotgun_sequence|gi|486278717|ref|NZ_KB821221.1|	0.023	99.977	601	2649824	2650425
Staphylococcus_#_aureus_!_M0424_{_genomic_}_scaffold_acunn-supercont1.2_whole_genome_shotgun_sequence|gi|487367927|ref|NZ_KB821338.1|	1.529	98.471	601	38709	39310
Staphylococcus_#_aureus_!_M0999_{_genomic_}_scaffold_acvqG-supercont1.2_whole_genome_shotgun_sequence|gi|486399550|ref|NZ_KB821821.1|	0.041	99.959	601	1476479	1477080
Staphylococcus_#_aureus_!_M1093_{_genomic_}_scaffold_acumQ-supercont1.3_whole_genome_shotgun_sequence|gi|486424345|ref|NZ_KB821948.1|	0.07	99.93	601	857762	858363
Staphylococcus_#_aureus_!_M1466_{_genomic_}_scaffold_acumV-supercont1.9_whole_genome_shotgun_sequence|gi|487401932|ref|NZ_KB822401.1|	0.196	99.804	601	305579	306180
Staphylococcus_#_aureus_!_subsp._{_aureus_}_D139_genomic_scaffold_supercont1.22_whole_genome_shotgun_sequence|gi|282917409|ref|NZ_GG730180.1|	0.542	99.458	601	110207	110808
Staphylococcus_#_aureus_!_subsp._{_aureus_}_D139_genomic_scaffold_supercont1.5_whole_genome_shotgun_sequence|gi|282915706|ref|NZ_GG730163.1|	0.715	99.285	601	83490	84091
Staphylococcus_#_aureus_!_subsp._{_aureus_}_EMRSA16_genomic_scaffold_supercont1.18_whole_genome_shotgun_sequence|gi|295428754|ref|NZ_GG770530.1|	0.289	99.711	601	207176	207777
Staphylococcus_#_aureus_!_subsp._{_aureus_}_H19_genomic_scaffold_supercont1.11_whole_genome_shotgun_sequence|gi|283771229|ref|NZ_GG730345.1|	0.548	99.452	601	109162	109763
Bacillus_#_cereus_!_BAG2O-1_{_genomic_}_scaffold_acfXE-supercont1.1_whole_genome_shotgun_sequence|gi|507003759|ref|NZ_KB976517.1|	0.011	99.989	600	5302248	5302848
Bacillus_#_cereus_!_BAG6X1-1_{_genomic_}_scaffold_supercont1.2_whole_genome_shotgun_sequence|gi|423479658|ref|NZ_JH804638.1|	0.149	99.851	600	403140	403740
Bacillus_#_cereus_!_K-5975c_{_genomic_}_scaffold_achrv-supercont1.1_whole_genome_shotgun_sequence|gi|507028190|ref|NZ_KB976300.1|	0.012	99.988	600	5208968	5209568
Bacillus_#_cereus_!_VD115_{_genomic_}_scaffold_supercont1.2_whole_genome_shotgun_sequence|gi|423618739|ref|NZ_JH792166.1|	0.091	99.909	600	660149	660749
Bacillus_#_cereus_!_VD148_{_genomic_}_scaffold_supercont1.2_whole_genome_shotgun_sequence|gi|423626141|ref|NZ_JH792157.1|	0.133	99.867	600	451247	451847
Bacillus_#_thuringiensis_!_DAR_{_81934_}_chromosome_chromosome_Scaffold_1_whole_genome_shotgun_sequence|gi|481032376|ref|NZ_CM001804.1|	0.011	99.989	600	5627825	5628425
Lactobacillus_#_reuteri_!_DSM_{_20016_}_chromosome_complete_genome|gi|148543243|ref|NC_009513.1|	0.03	99.97	600	1999018	1999618
Lactobacillus_#_reuteri_!_I5007_{_complete_}_genome|gi|512590512|ref|NC_021494.1|	0.031	99.969	600	1947106	1947706
Lactobacillus_#_reuteri_!_JCM_{_1112_}_complete_genome|gi|184152655|ref|NC_010609.1|	0.029	99.971	600	2038814	2039414
Lactobacillus_#_reuteri_!_SD2112_{_chromosome_}_complete_genome|gi|338202359|ref|NC_015697.1|	0.026	99.974	600	2263799	2264399
Lactobacillus_#_ruminis_!_ATCC_{_27782_}_chromosome_complete_genome|gi|347524522|ref|NC_015975.1|	0.029	99.971	600	2066052	2066652
Lactococcus_#_lactis_!_subsp._{_cremoris_}_UC509.9_complete_genome|gi|414073323|ref|NC_019435.1|	0.027	99.973	600	2249827	2250427
Listeria_#_ivanovii_!_subsp._{_ivanovii_}_PAM_55_complete_genome|gi|347547510|ref|NC_016011.1|	0.02	99.98	600	2928279	2928879
Listeria_#_monocytogenes_!_serotype_{_4b_}_str._LL195_complete_genome|gi|424712850|ref|NC_019556.1|	0.021	99.979	600	2904062	2904662
Staphylococcus_#_aureus_!_B147830_{_genomic_}_scaffold_acqwB-supercont1.2_whole_genome_shotgun_sequence|gi|486331620|ref|NZ_KB822312.1|	0.166	99.834	600	361760	362360
Staphylococcus_#_aureus_!_B40723_{_genomic_}_scaffold_acqwm-supercont1.10_whole_genome_shotgun_sequence|gi|486325523|ref|NZ_KB822326.1|	0.066	99.934	600	909805	910405
Staphylococcus_#_aureus_!_B53639_{_genomic_}_scaffold_acqwD-supercont1.5_whole_genome_shotgun_sequence|gi|486323796|ref|NZ_KB822345.1|	0.066	99.934	600	913982	914582
Staphylococcus_#_aureus_!_M0212_{_genomic_}_scaffold_acuna-supercont1.4_whole_genome_shotgun_sequence|gi|487361012|ref|NZ_KB821113.1|	0.054	99.946	600	1111499	1112099
Staphylococcus_#_aureus_!_M0213_{_genomic_}_scaffold_acqwL-supercont1.1_whole_genome_shotgun_sequence|gi|487373688|ref|NZ_KB821115.1|	0.043	99.957	600	1403752	1404352
Staphylococcus_#_aureus_!_M0240_{_genomic_}_scaffold_acqwO-supercont1.11_whole_genome_shotgun_sequence|gi|487374136|ref|NZ_KB821145.1|	0.086	99.914	600	697119	697719
Staphylococcus_#_aureus_!_M0273_{_genomic_}_scaffold_acqxR-supercont1.3_whole_genome_shotgun_sequence|gi|487375416|ref|NZ_KB821169.1|	0.101	99.899	600	593031	593631
Staphylococcus_#_aureus_!_M0329_{_genomic_}_scaffold_acrHa-supercont1.8_whole_genome_shotgun_sequence|gi|486276071|ref|NZ_KB821232.1|	0.665	99.335	600	89608	90208
Staphylococcus_#_aureus_!_M0391_{_genomic_}_scaffold_acqwG-supercont1.1_whole_genome_shotgun_sequence|gi|486290024|ref|NZ_KB821309.1|	0.054	99.946	600	1120722	1121322
Staphylococcus_#_aureus_!_M0467_{_genomic_}_scaffold_acqwA-supercont1.5_whole_genome_shotgun_sequence|gi|486307196|ref|NZ_KB821374.1|	0.041	99.959	600	1465980	1466580
Staphylococcus_#_aureus_!_M0562_{_genomic_}_scaffold_acumS-supercont1.1_whole_genome_shotgun_sequence|gi|487370065|ref|NZ_KB821470.1|	0.067	99.933	600	890215	890815
Staphylococcus_#_aureus_!_M0565_{_genomic_}_scaffold_acvqE-supercont1.2_whole_genome_shotgun_sequence|gi|486353966|ref|NZ_KB821480.1|	0.164	99.836	600	365500	366100
Staphylococcus_#_aureus_!_M0900_{_genomic_}_scaffold_acunz-supercont1.8_whole_genome_shotgun_sequence|gi|487386575|ref|NZ_KB821746.1|	0.066	99.934	600	908209	908809
Staphylococcus_#_aureus_!_M0944_{_genomic_}_scaffold_acvqy-supercont1.3_whole_genome_shotgun_sequence|gi|486395106|ref|NZ_KB821781.1|	0.284	99.716	600	210769	211369
Staphylococcus_#_aureus_!_M1016_{_genomic_}_scaffold_acvqx-supercont1.2_whole_genome_shotgun_sequence|gi|486405783|ref|NZ_KB821843.1|	0.225	99.775	600	265509	266109
Staphylococcus_#_aureus_!_M1037_{_genomic_}_scaffold_acvqz-supercont1.6_whole_genome_shotgun_sequence|gi|486411563|ref|NZ_KB821925.1|	0.065	99.935	600	917395	917995
Staphylococcus_#_aureus_!_M1092_{_genomic_}_scaffold_acunK-supercont1.1_whole_genome_shotgun_sequence|gi|486421969|ref|NZ_KB821957.1|	0.05	99.95	600	1198571	1199171
Staphylococcus_#_aureus_!_M1244_{_genomic_}_scaffold_acumu-supercont1.1_whole_genome_shotgun_sequence|gi|487396874|ref|NZ_KB822086.1|	0.191	99.809	600	313191	313791
Staphylococcus_#_aureus_!_M1521_{_genomic_}_scaffold_acunr-supercont1.6_whole_genome_shotgun_sequence|gi|487137659|ref|NZ_KB822273.1|	0.037	99.963	600	1638450	1639050
Staphylococcus_#_aureus_!_M1544_{_genomic_}_scaffold_acunm-supercont1.10_whole_genome_shotgun_sequence|gi|487138787|ref|NZ_KB822275.1|	0.096	99.904	600	622342	622942
Staphylococcus_#_aureus_!_M1578_{_genomic_}_scaffold_aculL-supercont1.1_whole_genome_shotgun_sequence|gi|487211632|ref|NZ_KB822320.1|	0.067	99.933	600	895279	895879
Staphylococcus_#_aureus_!_plasmid_{_SAP014A_}_complete_sequence|gi|260666135|ref|NC_013320.1|	1.19	98.81	600	49829	50429
Staphylococcus_#_aureus_!_plasmid_{_pGO1_}_complete_sequence|gi|226464389|ref|NC_012547.1|	1.111	98.889	600	53400	54000
Staphylococcus_#_aureus_!_subsp._{_aureus_}_A017934/97_genomic_scaffold_supercont1.14_whole_genome_shotgun_sequence|gi|283958620|ref|NZ_GG731508.1|	0.321	99.679	600	186340	186940
Staphylococcus_#_aureus_!_subsp._{_aureus_}_EMRSA16_genomic_scaffold_supercont1.6_whole_genome_shotgun_sequence|gi|295427053|ref|NZ_GG770518.1|	0.332	99.668	600	180170	180770
Staphylococcus_#_aureus_!_subsp._{_aureus_}_TCH130_genomic_scaffold_SCAFFOLD6_whole_genome_shotgun_sequence|gi|255925768|ref|NZ_GG698163.1|	0.543	99.457	600	109967	110567
Staphylococcus_#_aureus_!_subsp._{_aureus_}_WW2703/97_genomic_scaffold_supercont1.28_whole_genome_shotgun_sequence|gi|282909179|ref|NZ_GG730247.1|	0.349	99.651	600	171340	171940
Streptococcus_#_pyogenes_!_NZ131_{_chromosome_}_complete_genome|gi|209558587|ref|NC_011375.1|	0.033	99.967	600	1815185	1815785
Staphylococcus_#_aureus_!_subsp._{_aureus_}_MRSA131_genomic_scaffold_Scfld187_whole_genome_shotgun_sequence|gi|422746847|ref|NZ_GL638184.1|	3.349	96.651	587	16942	17529
Staphylococcus_#_aureus_!_M1061_{_genomic_}_scaffold_aculN-supercont1.7_whole_genome_shotgun_sequence|gi|487393670|ref|NZ_KB821898.1|	0.38	99.62	575	150777	151352
Staphylococcus_#_aureus_!_M1078_{_genomic_}_scaffold_aculT-supercont1.2_whole_genome_shotgun_sequence|gi|487400778|ref|NZ_KB822363.1|	0.066	99.934	575	876897	877472
Staphylococcus_#_aureus_!_M1359_{_genomic_}_scaffold_acumL-supercont1.2_whole_genome_shotgun_sequence|gi|486991067|ref|NZ_KB822205.1|	0.067	99.933	575	861531	862106
Staphylococcus_#_aureus_!_M1199_{_genomic_}_scaffold_acunF-supercont1.2_whole_genome_shotgun_sequence|gi|486456430|ref|NZ_KB822063.1|	0.135	99.865	574	425666	426240
Staphylococcus_#_caprae_!_C87_{_genomic_}_scaffold_supercont1.11_whole_genome_shotgun_sequence|gi|314934229|ref|NZ_GL545277.1|	9.18	90.82	555	5491	6046
Staphylococcus_#_aureus_!_subsp._{_aureus_}_MRSA177_genomic_scaffold_Scfld390_whole_genome_shotgun_sequence|gi|422744496|ref|NZ_GL638238.1|	1.727	98.273	517	29417	29934
Staphylococcus_#_epidermidis_!_BVS058A4_{_genomic_}_scaffold_supercont1.2_whole_genome_shotgun_sequence|gi|448879115|ref|NZ_KB373336.1|	0.061	99.939	513	841625	842138
Staphylococcus_#_aureus_!_M0328_{_genomic_}_scaffold_acrGR-supercont1.2_whole_genome_shotgun_sequence|gi|486271927|ref|NZ_KB821212.1|	0.195	99.805	510	260446	260956
Staphylococcus_#_aureus_!_M0539_{_genomic_}_scaffold_acvqn-supercont1.8_whole_genome_shotgun_sequence|gi|486349495|ref|NZ_KB821464.1|	0.217	99.783	510	234238	234748
Staphylococcus_#_aureus_!_M1061_{_genomic_}_scaffold_aculN-supercont1.3_whole_genome_shotgun_sequence|gi|487393463|ref|NZ_KB821894.1|	0.091	99.909	510	558880	559390
Staphylococcus_#_aureus_!_M1109_{_genomic_}_scaffold_acunD-supercont1.6_whole_genome_shotgun_sequence|gi|487395514|ref|NZ_KB822017.1|	0.199	99.801	510	255837	256347
Staphylococcus_#_aureus_!_M0177_{_genomic_}_scaffold_acumi-supercont1.2_whole_genome_shotgun_sequence|gi|487360048|ref|NZ_KB821079.1|	0.048	99.952	501	1038234	1038735
Staphylococcus_#_aureus_!_M1167_{_genomic_}_scaffold_acuns-supercont1.3_whole_genome_shotgun_sequence|gi|486432083|ref|NZ_KB822044.1|	0.062	99.938	501	808906	809407
Staphylococcus_#_aureus_!_M1224_{_genomic_}_scaffold_acumM-supercont1.6_whole_genome_shotgun_sequence|gi|487396747|ref|NZ_KB822082.1|	0.051	99.949	501	981971	982472
Staphylococcus_#_aureus_!_M1277_{_genomic_}_scaffold_acung-supercont1.2_whole_genome_shotgun_sequence|gi|486747506|ref|NZ_KB822137.1|	0.048	99.952	501	1053401	1053902
Staphylococcus_#_aureus_!_M1563_{_genomic_}_scaffold_acuoe-supercont1.3_whole_genome_shotgun_sequence|gi|487158594|ref|NZ_KB822306.1|	0.044	99.956	501	1140073	1140574
Staphylococcus_#_aureus_!_subsp._{_aureus_}_MRSA131_genomic_scaffold_Scfld383_whole_genome_shotgun_sequence|gi|422747240|ref|NZ_GL638196.1|	1.295	98.705	501	38175	38676
Staphylococcus_#_aureus_!_subsp._{_aureus_}_MRSA177_genomic_scaffold_Scfld39_whole_genome_shotgun_sequence|gi|422742487|ref|NZ_GL638204.1|	1.297	98.703	501	38117	38618
Staphylococcus_#_caprae_!_C87_{_genomic_}_scaffold_supercont1.6_whole_genome_shotgun_sequence|gi|314933097|ref|NZ_GL545272.1|	0.051	99.949	501	978192	978693
Bacillus_#_cereus_!_BAG1X2-1_{_genomic_}_scaffold_acfXL-supercont1.1_whole_genome_shotgun_sequence|gi|506995657|ref|NZ_KB976207.1|	0.009	99.991	500	5281477	5281977
Bacillus_#_cereus_!_VD148_{_genomic_}_scaffold_supercont1.4_whole_genome_shotgun_sequence|gi|423626789|ref|NZ_JH792159.1|	0.232	99.768	500	215408	215908
Bacillus_#_cereus_!_VD169_{_genomic_}_scaffold_supercont1.1_whole_genome_shotgun_sequence|gi|423646213|ref|NZ_JH791833.1|	0.01	99.99	500	5236166	5236666
Bacillus_#_cereus_!_str._{_Schrouff_}_genomic_scaffold_acsZZ-supercont2.2_whole_genome_shotgun_sequence|gi|506986825|ref|NZ_KB976117.1|	0.074	99.926	500	672527	673027
Bacillus_#_pumilus_!_SAFR-032_{_chromosome_}_complete_genome|gi|157690798|ref|NC_009848.1|	0.013	99.987	500	3703965	3704465
Geobacillus_#_thermoglucosidans_!_TNO-09.020_{_chromosome_}_whole_genome_shotgun_sequence|gi|423718272|ref|NZ_CM001483.1|	0.013	99.987	500	3739738	3740238
Lactobacillus_#_brevis_!_ATCC_{_367_}_complete_genome|gi|116332681|ref|NC_008497.1|	0.022	99.978	500	2290720	2291220
Lactobacillus_#_buchneri_!_CD034_{_chromosome_}_complete_genome|gi|406025865|ref|NC_018610.1|	0.02	99.98	500	2500064	2500564
Lactobacillus_#_buchneri_!_NRRL_{_B-30929_}_chromosome_complete_genome|gi|331700395|ref|NC_015428.1|	0.02	99.98	500	2505801	2506301
Lactobacillus_#_casei_!_ATCC_{_334_}_chromosome_complete_genome|gi|116493574|ref|NC_008526.1|	0.017	99.983	500	2894764	2895264
Lactobacillus_#_casei_!_BD-II_{_chromosome_}_complete_genome|gi|385821700|ref|NC_017474.1|	0.016	99.984	500	3069426	3069926
Lactobacillus_#_casei_!_BL23_{_chromosome_}_complete_genome|gi|191636824|ref|NC_010999.1|	0.016	99.984	500	3078696	3079196
Lactobacillus_#_casei_!_LC2W_{_chromosome_}_complete_genome|gi|385818534|ref|NC_017473.1|	0.016	99.984	500	3038542	3039042
Lactobacillus_#_casei_!_LOCK919_{_complete_}_genome|gi|523512490|ref|NC_021721.1|	0.016	99.984	500	3113101	3113601
Lactobacillus_#_casei_!_str._{_Zhang_}_chromosome_complete_genome|gi|301065125|ref|NC_014334.1|	0.017	99.983	500	2861348	2861848
Lactobacillus_#_fermentum_!_F-6_{_complete_}_genome|gi|501673812|ref|NC_021235.1|	0.024	99.976	500	2064120	2064620
Lactobacillus_#_fermentum_!_IFO_{_3956_}_complete_genome|gi|184154476|ref|NC_010610.1|	0.024	99.976	500	2098185	2098685
Lactobacillus_#_pentosus_!_KCA1_{_chromosome_}_whole_genome_shotgun_sequence|gi|393393939|ref|NZ_CM001538.1|	0.015	99.985	500	3425823	3426323
Lactobacillus_#_plantarum_!_16_{_complete_}_genome|gi|513839884|ref|NC_021514.1|	0.016	99.984	500	3044178	3044678
Lactobacillus_#_plantarum_!_JDM1_{_complete_}_genome|gi|254555169|ref|NC_012984.1|	0.016	99.984	500	3197259	3197759
Lactobacillus_#_plantarum_!_WCFS1_{_complete_}_genome|gi|380031102|ref|NC_004567.2|	0.015	99.985	500	3307773	3308273
Lactobacillus_#_plantarum_!_subsp._{_plantarum_}_P-8_complete_genome|gi|501145339|ref|NC_021224.1|	0.016	99.984	500	3033066	3033566
Lactobacillus_#_plantarum_!_subsp._{_plantarum_}_ST-III_chromosome_complete_genome|gi|308179191|ref|NC_014554.1|	0.015	99.985	500	3253876	3254376
Lactobacillus_#_rhamnosus_!_ATCC_{_8530_}_chromosome_complete_genome|gi|385833938|ref|NC_017491.1|	0.017	99.983	500	2959839	2960339
Lactobacillus_#_rhamnosus_!_GG_{_chromosome_}_complete_genome|gi|258506995|ref|NC_013198.1|	0.017	99.983	500	3009611	3010111
Lactobacillus_#_rhamnosus_!_GG_{_complete_}_genome|gi|385826720|ref|NC_017482.1|	0.017	99.983	500	3004551	3005051
Lactobacillus_#_rhamnosus_!_LOCK900_{_complete_}_genome|gi|523515595|ref|NC_021723.1|	0.017	99.983	500	2882876	2883376
Lactobacillus_#_rhamnosus_!_LOCK908_{_complete_}_genome|gi|523518464|ref|NC_021725.1|	0.017	99.983	500	2990400	2990900
Lactobacillus_#_rhamnosus_!_Lc_{_705_}_chromosome_complete_genome|gi|258538191|ref|NC_013199.1|	0.017	99.983	500	2968098	2968598
Staphylococcus_#_aureus_!_M0077_{_genomic_}_scaffold_acunP-supercont1.3_whole_genome_shotgun_sequence|gi|487350165|ref|NZ_KB821001.1|	0.164	99.836	500	305184	305684
Staphylococcus_#_aureus_!_M0102_{_genomic_}_scaffold_acqwC-supercont1.1_whole_genome_shotgun_sequence|gi|486239304|ref|NZ_KB821006.1|	0.142	99.858	500	350911	351411
Staphylococcus_#_aureus_!_M0108_{_genomic_}_scaffold_acunZ-supercont1.3_whole_genome_shotgun_sequence|gi|487358582|ref|NZ_KB821035.1|	0.191	99.809	500	261188	261688
Staphylococcus_#_aureus_!_M0273_{_genomic_}_scaffold_acqxR-supercont1.1_whole_genome_shotgun_sequence|gi|487375323|ref|NZ_KB821167.1|	0.035	99.965	500	1421457	1421957
Staphylococcus_#_aureus_!_M0279_{_genomic_}_scaffold_acqxn-supercont1.3_whole_genome_shotgun_sequence|gi|487376092|ref|NZ_KB821176.1|	0.045	99.955	500	1113974	1114474
Staphylococcus_#_aureus_!_M0364_{_genomic_}_scaffold_acqwM-supercont1.6_whole_genome_shotgun_sequence|gi|486288766|ref|NZ_KB821269.1|	0.068	99.932	500	732190	732690
Staphylococcus_#_aureus_!_M0404_{_genomic_}_scaffold_acrGQ-supercont1.5_whole_genome_shotgun_sequence|gi|487378809|ref|NZ_KB821306.1|	0.286	99.714	500	174469	174969
Staphylococcus_#_aureus_!_M0539_{_genomic_}_scaffold_acvqn-supercont1.5_whole_genome_shotgun_sequence|gi|486349175|ref|NZ_KB821461.1|	0.145	99.855	500	345435	345935
Staphylococcus_#_aureus_!_M0663_{_genomic_}_scaffold_acuoc-supercont1.4_whole_genome_shotgun_sequence|gi|487382034|ref|NZ_KB821555.1|	0.144	99.856	500	345679	346179
Staphylococcus_#_aureus_!_M0769_{_genomic_}_scaffold_acvqF-supercont1.2_whole_genome_shotgun_sequence|gi|480447120|ref|NZ_KB821630.1|	0.146	99.854	500	342439	342939
Staphylococcus_#_aureus_!_M0780_{_genomic_}_scaffold_acvqm-supercont1.6_whole_genome_shotgun_sequence|gi|486377135|ref|NZ_KB821667.1|	0.055	99.945	500	913143	913643
Staphylococcus_#_aureus_!_M0927_{_genomic_}_scaffold_aculU-supercont1.11_whole_genome_shotgun_sequence|gi|487387049|ref|NZ_KB821750.1|	0.079	99.921	500	631054	631554
Staphylococcus_#_aureus_!_M0953_{_genomic_}_scaffold_acvql-supercont1.5_whole_genome_shotgun_sequence|gi|486397088|ref|NZ_KB821799.1|	0.046	99.954	500	1075083	1075583
Staphylococcus_#_aureus_!_M1076_{_genomic_}_scaffold_acumq-supercont1.4_whole_genome_shotgun_sequence|gi|486418406|ref|NZ_KB821954.1|	0.046	99.954	500	1089814	1090314
Staphylococcus_#_aureus_!_M1119_{_genomic_}_scaffold_acunS-supercont1.1_whole_genome_shotgun_sequence|gi|486430214|ref|NZ_KB822021.1|	0.047	99.953	500	1071293	1071793
Staphylococcus_#_aureus_!_M1126_{_genomic_}_scaffold_acumd-supercont1.7_whole_genome_shotgun_sequence|gi|487395966|ref|NZ_KB822004.1|	0.364	99.636	500	137029	137529
Staphylococcus_#_aureus_!_M1142_{_genomic_}_scaffold_acumk-supercont1.2_whole_genome_shotgun_sequence|gi|487396191|ref|NZ_KB821989.1|	0.04	99.96	500	1242894	1243394
Staphylococcus_#_aureus_!_M1277_{_genomic_}_scaffold_acung-supercont1.1_whole_genome_shotgun_sequence|gi|486739869|ref|NZ_KB822136.1|	0.132	99.868	500	379028	379528
Staphylococcus_#_aureus_!_M1463_{_genomic_}_scaffold_acums-supercont1.9_whole_genome_shotgun_sequence|gi|487136422|ref|NZ_KB822564.1|	0.058	99.942	500	854951	855451
Staphylococcus_#_aureus_!_M1578_{_genomic_}_scaffold_aculL-supercont1.3_whole_genome_shotgun_sequence|gi|487223404|ref|NZ_KB822322.1|	0.054	99.946	500	917660	918160
Staphylococcus_#_aureus_!_subsp._{_aureus_}_C160_genomic_scaffold_supercont1.10_whole_genome_shotgun_sequence|gi|282904457|ref|NZ_GG730282.1|	0.495	99.505	500	100597	101097
Staphylococcus_#_aureus_!_subsp._{_aureus_}_C160_genomic_scaffold_supercont1.20_whole_genome_shotgun_sequence|gi|282904618|ref|NZ_GG730292.1|	0.558	99.442	500	89061	89561
Staphylococcus_#_aureus_!_subsp._{_aureus_}_CM05_genomic_scaffold_Scfld153_whole_genome_shotgun_sequence|gi|424772886|ref|NZ_JH806533.1|	0.695	99.305	500	71489	71989
Staphylococcus_#_aureus_!_subsp._{_aureus_}_MRSA177_genomic_scaffold_Scfld74_whole_genome_shotgun_sequence|gi|422743355|ref|NZ_GL638218.1|	1.999	98.001	500	24509	25009
Staphylococcus_#_aureus_!_subsp._{_aureus_}_WBG10049_genomic_scaffold_supercont1.7_whole_genome_shotgun_sequence|gi|282911485|ref|NZ_GG730214.1|	0.344	99.656	500	144668	145168
Streptococcus_#_parauberis_!_KCTC_{_11537_}_chromosome_complete_genome|gi|333904249|ref|NC_015558.1|	0.023	99.977	500	2143387	2143887
Streptococcus_#_pasteurianus_!_ATCC_{_43144_}_complete_genome|gi|336063372|ref|NC_015600.1|	0.024	99.976	500	2099577	2100077
Weissella_#_koreensis_!_KACC_{_15510_}_chromosome_complete_genome|gi|339633914|ref|NC_015759.1|	0.035	99.965	500	1421978	1422478
Staphylococcus_#_aureus_!_M0877_{_genomic_}_scaffold_acumt-supercont1.3_whole_genome_shotgun_sequence|gi|487385094|ref|NZ_KB821716.1|	0.45	99.55	489	108081	108570
Staphylococcus_#_aureus_!_M0676_{_genomic_}_scaffold_acvqP-supercont1.3_whole_genome_shotgun_sequence|gi|486364032|ref|NZ_KB821573.1|	0.078	99.922	475	604747	605222
Staphylococcus_#_aureus_!_M0871_{_genomic_}_scaffold_acumy-supercont1.3_whole_genome_shotgun_sequence|gi|487384546|ref|NZ_KB821703.1|	0.08	99.92	475	596706	597181
Staphylococcus_#_aureus_!_subsp._{_aureus_}_M809_genomic_scaffold_supercont1.5_whole_genome_shotgun_sequence|gi|293509335|ref|NZ_GG749303.1|	27.838	72.162	466	1208	1674
Staphylococcus_#_lugdunensis_!_ACS-027-V-Sch2_{_genomic_}_scaffold_supercont1.4_whole_genome_shotgun_sequence|gi|448879136|ref|NZ_KB373325.1|	0.963	99.037	466	47900	48366
Staphylococcus_#_lugdunensis_!_M23590_{_genomic_}_scaffold_SCAFFOLD6_whole_genome_shotgun_sequence|gi|319430689|ref|NZ_GL622356.1|	14.727	85.273	458	2652	3110
Staphylococcus_#_epidermidis_!_M0881_{_genomic_}_scaffold_acumm-supercont1.3_whole_genome_shotgun_sequence|gi|489047070|ref|NZ_KB821723.1|	0.366	99.634	455	123791	124246
Staphylococcus_#_caprae_!_C87_{_genomic_}_scaffold_supercont1.12_whole_genome_shotgun_sequence|gi|314934230|ref|NZ_GL545278.1|	0.049	99.951	437	884439	884876
Staphylococcus_#_aureus_!_subsp._{_aureus_}_MRSA131_genomic_scaffold_Scfld94_whole_genome_shotgun_sequence|gi|422745882|ref|NZ_GL638176.1|	2.646	97.354	417	15344	15761
Staphylococcus_#_aureus_!_M0375_{_genomic_}_scaffold_acunY-supercont1.5_whole_genome_shotgun_sequence|gi|487365960|ref|NZ_KB821291.1|	0.169	99.831	411	242207	242618
Staphylococcus_#_aureus_!_M0103_{_genomic_}_scaffold_acqxd-supercont1.6_whole_genome_shotgun_sequence|gi|486247172|ref|NZ_KB821019.1|	0.588	99.412	410	69340	69750
Staphylococcus_#_aureus_!_M0528_{_genomic_}_scaffold_acvqo-supercont1.1_whole_genome_shotgun_sequence|gi|486334820|ref|NZ_KB821414.1|	0.129	99.871	410	318349	318759
Staphylococcus_#_aureus_!_M0770_{_genomic_}_scaffold_acvra-supercont1.8_whole_genome_shotgun_sequence|gi|480453779|ref|NZ_KB821648.1|	0.261	99.739	410	156703	157113
Staphylococcus_#_aureus_!_M1119_{_genomic_}_scaffold_acunS-supercont1.8_whole_genome_shotgun_sequence|gi|486431372|ref|NZ_KB822032.1|	0.305	99.695	410	133909	134319
Staphylococcus_#_aureus_!_M1578_{_genomic_}_scaffold_aculL-supercont1.2_whole_genome_shotgun_sequence|gi|487219486|ref|NZ_KB822321.1|	0.039	99.961	402	1037674	1038076
Staphylococcus_#_aureus_!_B147830_{_genomic_}_scaffold_acqwB-supercont1.4_whole_genome_shotgun_sequence|gi|486332219|ref|NZ_KB822314.1|	0.048	99.952	401	829868	830269
Staphylococcus_#_aureus_!_M0001_{_genomic_}_scaffold_acrHn-supercont1.13_whole_genome_shotgun_sequence|gi|486217781|ref|NZ_KB820931.1|	2.008	97.992	401	19565	19966
Staphylococcus_#_aureus_!_M0374_{_genomic_}_scaffold_aculK-supercont1.1_whole_genome_shotgun_sequence|gi|487365394|ref|NZ_KB821278.1|	0.038	99.962	401	1045049	1045450
Staphylococcus_#_aureus_!_M0510_{_genomic_}_scaffold_acumF-supercont1.4_whole_genome_shotgun_sequence|gi|487369183|ref|NZ_KB821410.1|	0.025	99.975	401	1589058	1589459
Staphylococcus_#_aureus_!_M0660_{_genomic_}_scaffold_acumg-supercont1.11_whole_genome_shotgun_sequence|gi|487381401|ref|NZ_KB821533.1|	0.133	99.867	401	300013	300414
Staphylococcus_#_aureus_!_M0978_{_genomic_}_scaffold_acunG-supercont1.3_whole_genome_shotgun_sequence|gi|487389994|ref|NZ_KB821773.1|	0.115	99.885	401	348861	349262
Staphylococcus_#_aureus_!_M1036_{_genomic_}_scaffold_acvqI-supercont1.9_whole_genome_shotgun_sequence|gi|486409401|ref|NZ_KB821870.1|	0.04	99.96	401	1010780	1011181
Staphylococcus_#_aureus_!_M1291_{_genomic_}_scaffold_acumW-supercont1.5_whole_genome_shotgun_sequence|gi|486798074|ref|NZ_KB822170.1|	0.076	99.924	401	528098	528499
Staphylococcus_#_aureus_!_M1374_{_genomic_}_scaffold_acumR-supercont1.3_whole_genome_shotgun_sequence|gi|487398639|ref|NZ_KB822221.1|	0.05	99.95	401	804837	805238
Staphylococcus_#_aureus_!_subsp._{_aureus_}_TCH130_genomic_scaffold_SCAFFOLD12_whole_genome_shotgun_sequence|gi|255925774|ref|NZ_GG698169.1|	1.029	98.971	401	38580	38981
Staphylococcus_#_aureus_!_subsp._{_aureus_}_USA300_TCH959_genomic_scaffold_SCAFFOLD7_whole_genome_shotgun_sequence|gi|255926323|ref|NZ_GG697991.1|	1.034	98.966	401	38368	38769
Staphylococcus_#_epidermidis_!_M23864:W1_{_genomic_}_scaffold_SCAFFOLD1_whole_genome_shotgun_sequence|gi|254213011|ref|NZ_GG696773.1|	0.029	99.971	401	1392191	1392592
Staphylococcus_#_lugdunensis_!_M23590_{_genomic_}_scaffold_SCAFFOLD1_whole_genome_shotgun_sequence|gi|319430684|ref|NZ_GL622351.1|	0.032	99.968	401	1264827	1265228
Staphylococcus_#_massiliensis_!_CCUG_{_55927_}_scaffold00001_whole_genome_shotgun_sequence|gi|484268961|ref|NZ_JH815593.1|	0.023	99.977	401	1761030	1761431
Aerococcus_#_urinae_!_ACS-120-V-Col10a_{_chromosome_}_complete_genome|gi|326802614|ref|NC_015278.1|	0.019	99.981	400	2080574	2080974
Bacillus_#_atrophaeus_!_UCMB-5137_{_chromosome_}_whole_genome_shotgun_sequence|gi|498488879|ref|NZ_CM001847.1|	0.01	99.99	400	4115619	4116019
Bacillus_#_cereus_!_BAG1X1-1_{_genomic_}_scaffold_acfXz-supercont1.3_whole_genome_shotgun_sequence|gi|506995043|ref|NZ_KB976166.1|	0.083	99.917	400	481117	481517
Bacillus_#_cereus_!_BtB2-4_{_genomic_}_scaffold_supercont1.1_whole_genome_shotgun_sequence|gi|423485377|ref|NZ_JH804642.1|	0.008	99.992	400	5320398	5320798
Bacillus_#_cereus_!_ISP3191_{_genomic_}_scaffold_supercont1.1_whole_genome_shotgun_sequence|gi|423549369|ref|NZ_JH792131.1|	0.009	99.991	400	4543483	4543883
Bacillus_#_cereus_!_K-5975c_{_genomic_}_scaffold_achrv-supercont1.4_whole_genome_shotgun_sequence|gi|507028230|ref|NZ_KB976305.1|	0.22	99.78	400	181116	181516
Bacillus_#_cereus_!_MSX-A1_{_genomic_}_scaffold_supercont1.2_whole_genome_shotgun_sequence|gi|423565564|ref|NZ_JH792105.1|	0.059	99.941	400	675291	675691
Bacillus_#_cereus_!_VD107_{_genomic_}_scaffold_supercont1.3_whole_genome_shotgun_sequence|gi|423613705|ref|NZ_JH792234.1|	0.094	99.906	400	427164	427564
Bacillus_#_cereus_!_VDM019_{_genomic_}_scaffold_achrj-supercont1.1_whole_genome_shotgun_sequence|gi|507056656|ref|NZ_KB976196.1|	0.009	99.991	400	4575287	4575687
Bacillus_#_cereus_!_VDM022_{_genomic_}_scaffold_supercont1.1_whole_genome_shotgun_sequence|gi|423659603|ref|NZ_JH791837.1|	0.009	99.991	400	4585653	4586053
Bacillus_#_cereus_!_VDM062_{_genomic_}_scaffold_supercont1.1_whole_genome_shotgun_sequence|gi|423672457|ref|NZ_JH791802.1|	0.008	99.992	400	4894911	4895311
Bacillus_#_mojavensis_!_RO-H-1_{_genomic_}_scaffold_gbs2c.contig.6_whole_genome_shotgun_sequence|gi|397738187|ref|NZ_JH600283.1|	0.469	99.531	400	84926	85326
Carnobacterium_#_maltaromaticum_!_LMA28_{_complete_}_genome|gi|508605261|ref|NC_019425.2|	0.011	99.989	400	3650016	3650416
Enterococcus_#_faecalis_!_str._{_Symbioflor_}_1_complete_genome|gi|428765681|ref|NC_019770.1|	0.014	99.986	400	2810275	2810675
Lactobacillus_#_acidophilus_!_30SC_{_chromosome_}_complete_genome|gi|325955721|ref|NC_015214.1|	0.019	99.981	400	2077601	2078001
Lactobacillus_#_fermentum_!_CECT_{_5716_}_chromosome_complete_genome|gi|385811786|ref|NC_017465.1|	0.019	99.981	400	2100049	2100449
Lactobacillus_#_helveticus_!_DPC_{_4571_}_complete_genome|gi|161506634|ref|NC_010080.1|	0.019	99.981	400	2080531	2080931
Lactobacillus_#_helveticus_!_H10_{_chromosome_}_complete_genome|gi|385812838|ref|NC_017467.1|	0.019	99.981	400	2145499	2145899
Lactobacillus_#_helveticus_!_R0052_{_chromosome_}_complete_genome|gi|403514032|ref|NC_018528.1|	0.019	99.981	400	2128806	2129206
Leuconostoc_#_citreum_!_KM20_{_complete_}_genome|gi|170016358|ref|NC_010471.1|	0.022	99.978	400	1795884	1796284
Leuconostoc_#_gasicomitatum_!_LMG_{_18811_}_complete_genome|gi|300172302|ref|NC_014319.1|	0.02	99.98	400	1953680	1954080
Leuconostoc_#_kimchii_!_IMSNU_{_11154_}_chromosome_complete_genome|gi|296110131|ref|NC_014136.1|	0.02	99.98	400	2002321	2002721
Leuconostoc_#_mesenteroides_!_subsp._{_mesenteroides_}_ATCC_8293_chromosome_complete_genome|gi|116617174|ref|NC_008531.1|	0.02	99.98	400	2037996	2038396
Leuconostoc_#_mesenteroides_!_subsp._{_mesenteroides_}_J18_chromosome_complete_genome|gi|381335653|ref|NC_016805.1|	0.021	99.979	400	1896161	1896561
Melissococcus_#_plutonius_!_ATCC_{_35311_}_chromosome_complete_genome|gi|332685534|ref|NC_015516.1|	0.021	99.979	400	1890614	1891014
Oceanobacillus_#_kimchii_!_X50_{_scaffold00001_}_chromosome_whole_genome_shotgun_sequence|gi|484122473|ref|NZ_CM001792.1|	0.01	99.99	400	3830381	3830781
Pediococcus_#_claussenii_!_ATCC_{_BAA-344_}_chromosome_complete_genome|gi|377808793|ref|NC_016605.1|	0.022	99.978	400	1828711	1829111
Staphylococcus_#_aureus_!_M0001_{_genomic_}_scaffold_acrHn-supercont1.10_whole_genome_shotgun_sequence|gi|486217193|ref|NZ_KB820928.1|	0.135	99.865	400	296683	297083
Staphylococcus_#_aureus_!_M0001_{_genomic_}_scaffold_acrHn-supercont1.11_whole_genome_shotgun_sequence|gi|486217544|ref|NZ_KB820929.1|	1.325	98.675	400	29793	30193
Staphylococcus_#_aureus_!_M0001_{_genomic_}_scaffold_acrHn-supercont1.14_whole_genome_shotgun_sequence|gi|486217861|ref|NZ_KB820932.1|	3.598	96.402	400	10717	11117
Staphylococcus_#_aureus_!_M0060_{_genomic_}_scaffold_acrGU-supercont1.7_whole_genome_shotgun_sequence|gi|487344359|ref|NZ_KB820990.1|	0.567	99.433	400	70156	70556
Staphylococcus_#_aureus_!_M0108_{_genomic_}_scaffold_acunZ-supercont1.1_whole_genome_shotgun_sequence|gi|487350973|ref|NZ_KB821033.1|	0.082	99.918	400	489315	489715
Staphylococcus_#_aureus_!_M0108_{_genomic_}_scaffold_acunZ-supercont1.2_whole_genome_shotgun_sequence|gi|487356577|ref|NZ_KB821034.1|	0.114	99.886	400	351418	351818
Staphylococcus_#_aureus_!_M0144_{_genomic_}_scaffold_acunq-supercont1.1_whole_genome_shotgun_sequence|gi|487359044|ref|NZ_KB821038.1|	0.03	99.97	400	1348634	1349034
Staphylococcus_#_aureus_!_M0154_{_genomic_}_scaffold_acumB-supercont1.11_whole_genome_shotgun_sequence|gi|487359499|ref|NZ_KB821045.1|	0.055	99.945	400	733095	733495
Staphylococcus_#_aureus_!_M0197_{_genomic_}_scaffold_acrGV-supercont1.5_whole_genome_shotgun_sequence|gi|486257904|ref|NZ_KB821088.1|	0.668	99.332	400	59441	59841
Staphylococcus_#_aureus_!_M0237_{_genomic_}_scaffold_acrHd-supercont1.6_whole_genome_shotgun_sequence|gi|486262447|ref|NZ_KB821138.1|	0.064	99.936	400	624136	624536
Staphylococcus_#_aureus_!_M0270_{_genomic_}_scaffold_acrGX-supercont1.6_whole_genome_shotgun_sequence|gi|487375023|ref|NZ_KB821163.1|	0.237	99.763	400	168101	168501
Staphylococcus_#_aureus_!_M0270_{_genomic_}_scaffold_acrGX-supercont1.7_whole_genome_shotgun_sequence|gi|487375056|ref|NZ_KB821164.1|	0.136	99.864	400	292958	293358
Staphylococcus_#_aureus_!_M0328_{_genomic_}_scaffold_acrGR-supercont1.4_whole_genome_shotgun_sequence|gi|486272995|ref|NZ_KB821214.1|	0.024	99.976	400	1652596	1652996
Staphylococcus_#_aureus_!_M0329_{_genomic_}_scaffold_acrHa-supercont1.9_whole_genome_shotgun_sequence|gi|486276662|ref|NZ_KB821233.1|	0.054	99.946	400	738817	739217
Staphylococcus_#_aureus_!_M0347_{_genomic_}_scaffold_acqxu-supercont1.2_whole_genome_shotgun_sequence|gi|486282563|ref|NZ_KB821247.1|	0.082	99.918	400	486646	487046
Staphylococcus_#_aureus_!_M0374_{_genomic_}_scaffold_aculK-supercont1.2_whole_genome_shotgun_sequence|gi|487365422|ref|NZ_KB821279.1|	0.182	99.818	400	219759	220159
Staphylococcus_#_aureus_!_M0391_{_genomic_}_scaffold_acqwG-supercont1.4_whole_genome_shotgun_sequence|gi|486290526|ref|NZ_KB821312.1|	2.319	97.681	400	16847	17247
Staphylococcus_#_aureus_!_M0460_{_genomic_}_scaffold_acqxK-supercont1.1_whole_genome_shotgun_sequence|gi|487379773|ref|NZ_KB821363.1|	0.116	99.884	400	343940	344340
Staphylococcus_#_aureus_!_M0460_{_genomic_}_scaffold_acqxK-supercont1.4_whole_genome_shotgun_sequence|gi|487379995|ref|NZ_KB821366.1|	0.028	99.972	400	1422813	1423213
Staphylococcus_#_aureus_!_M0467_{_genomic_}_scaffold_acqwA-supercont1.3_whole_genome_shotgun_sequence|gi|486306261|ref|NZ_KB821372.1|	0.23	99.77	400	173778	174178
Staphylococcus_#_aureus_!_M0562_{_genomic_}_scaffold_acumS-supercont1.3_whole_genome_shotgun_sequence|gi|487370246|ref|NZ_KB821472.1|	0.294	99.706	400	135572	135972
Staphylococcus_#_aureus_!_M0565_{_genomic_}_scaffold_acvqE-supercont1.6_whole_genome_shotgun_sequence|gi|486355103|ref|NZ_KB821484.1|	0.044	99.956	400	908664	909064
Staphylococcus_#_aureus_!_M0602_{_genomic_}_scaffold_acvqp-supercont1.7_whole_genome_shotgun_sequence|gi|486360548|ref|NZ_KB821499.1|	0.033	99.967	400	1226968	1227368
Staphylococcus_#_aureus_!_M0622_{_genomic_}_scaffold_acvqA-supercont1.2_whole_genome_shotgun_sequence|gi|486361222|ref|NZ_KB821503.1|	0.111	99.889	400	358513	358913
Staphylococcus_#_aureus_!_M0648_{_genomic_}_scaffold_acunl-supercont1.4_whole_genome_shotgun_sequence|gi|487381120|ref|NZ_KB821525.1|	0.068	99.932	400	590715	591115
Staphylococcus_#_aureus_!_M0648_{_genomic_}_scaffold_acunl-supercont1.7_whole_genome_shotgun_sequence|gi|487381226|ref|NZ_KB821528.1|	0.136	99.864	400	293273	293673
Staphylococcus_#_aureus_!_M0660_{_genomic_}_scaffold_acumg-supercont1.5_whole_genome_shotgun_sequence|gi|487381527|ref|NZ_KB821541.1|	0.101	99.899	400	395791	396191
Staphylococcus_#_aureus_!_M0676_{_genomic_}_scaffold_acvqP-supercont1.5_whole_genome_shotgun_sequence|gi|486364576|ref|NZ_KB821575.1|	0.044	99.956	400	911850	912250
Staphylococcus_#_aureus_!_M0770_{_genomic_}_scaffold_acvra-supercont1.1_whole_genome_shotgun_sequence|gi|480449782|ref|NZ_KB821638.1|	0.028	99.972	400	1415936	1416336
Staphylococcus_#_aureus_!_M0770_{_genomic_}_scaffold_acvra-supercont1.4_whole_genome_shotgun_sequence|gi|480452316|ref|NZ_KB821644.1|	0.086	99.914	400	462349	462749
Staphylococcus_#_aureus_!_M0780_{_genomic_}_scaffold_acvqm-supercont1.2_whole_genome_shotgun_sequence|gi|486375972|ref|NZ_KB821663.1|	0.117	99.883	400	342112	342512
Staphylococcus_#_aureus_!_M0792_{_genomic_}_scaffold_acuni-supercont1.3_whole_genome_shotgun_sequence|gi|487382989|ref|NZ_KB821673.1|	0.117	99.883	400	340852	341252
Staphylococcus_#_aureus_!_M0871_{_genomic_}_scaffold_acumy-supercont1.4_whole_genome_shotgun_sequence|gi|487384623|ref|NZ_KB821704.1|	0.146	99.854	400	274049	274449
Staphylococcus_#_aureus_!_M0892_{_genomic_}_scaffold_aculW-supercont1.5_whole_genome_shotgun_sequence|gi|487385784|ref|NZ_KB821734.1|	0.054	99.946	400	734959	735359
Staphylococcus_#_aureus_!_M0943_{_genomic_}_scaffold_acvqw-supercont1.4_whole_genome_shotgun_sequence|gi|486391659|ref|NZ_KB821768.1|	0.187	99.813	400	213836	214236
Staphylococcus_#_aureus_!_M1010_{_genomic_}_scaffold_acvqt-supercont1.4_whole_genome_shotgun_sequence|gi|486403291|ref|NZ_KB821827.1|	0.036	99.964	400	1117114	1117514
Staphylococcus_#_aureus_!_M1061_{_genomic_}_scaffold_aculN-supercont1.4_whole_genome_shotgun_sequence|gi|487393526|ref|NZ_KB821895.1|	2.16	97.84	400	18119	18519
Staphylococcus_#_aureus_!_M1061_{_genomic_}_scaffold_aculN-supercont1.9_whole_genome_shotgun_sequence|gi|487393922|ref|NZ_KB821900.1|	0.076	99.924	400	527709	528109
Staphylococcus_#_aureus_!_M1062_{_genomic_}_scaffold_aculY-supercont1.2_whole_genome_shotgun_sequence|gi|487394108|ref|NZ_KB821913.1|	0.117	99.883	400	341932	342332
Staphylococcus_#_aureus_!_M1062_{_genomic_}_scaffold_aculY-supercont1.7_whole_genome_shotgun_sequence|gi|487394275|ref|NZ_KB821918.1|	0.043	99.957	400	927790	928190
Staphylococcus_#_aureus_!_M1068_{_genomic_}_scaffold_acunM-supercont1.6_whole_genome_shotgun_sequence|gi|487394575|ref|NZ_KB821932.1|	0.043	99.957	400	922783	923183
Staphylococcus_#_aureus_!_M1092_{_genomic_}_scaffold_acunK-supercont1.5_whole_genome_shotgun_sequence|gi|486422832|ref|NZ_KB821961.1|	0.331	99.669	400	120348	120748
Staphylococcus_#_aureus_!_M1093_{_genomic_}_scaffold_acumQ-supercont1.2_whole_genome_shotgun_sequence|gi|486423861|ref|NZ_KB821947.1|	0.074	99.926	400	542960	543360
Staphylococcus_#_aureus_!_M1093_{_genomic_}_scaffold_acumQ-supercont1.5_whole_genome_shotgun_sequence|gi|486424990|ref|NZ_KB821950.1|	0.03	99.97	400	1314234	1314634
Staphylococcus_#_aureus_!_M1095_{_genomic_}_scaffold_aculR-supercont1.8_whole_genome_shotgun_sequence|gi|486427208|ref|NZ_KB821986.1|	0.06	99.94	400	667898	668298
Staphylococcus_#_aureus_!_M1224_{_genomic_}_scaffold_acumM-supercont1.3_whole_genome_shotgun_sequence|gi|487396630|ref|NZ_KB822079.1|	0.117	99.883	400	340438	340838
Staphylococcus_#_aureus_!_M1224_{_genomic_}_scaffold_acumM-supercont1.5_whole_genome_shotgun_sequence|gi|487396680|ref|NZ_KB822081.1|	0.274	99.726	400	145327	145727
Staphylococcus_#_aureus_!_M1224_{_genomic_}_scaffold_acumM-supercont1.9_whole_genome_shotgun_sequence|gi|487396822|ref|NZ_KB822085.1|	0.064	99.936	400	623259	623659
Staphylococcus_#_aureus_!_M1248_{_genomic_}_scaffold_acunw-supercont1.2_whole_genome_shotgun_sequence|gi|486644648|ref|NZ_KB822100.1|	0.117	99.883	400	342764	343164
Staphylococcus_#_aureus_!_M1275_{_genomic_}_scaffold_acumX-supercont1.2_whole_genome_shotgun_sequence|gi|487397542|ref|NZ_KB822131.1|	0.09	99.91	400	443777	444177
Staphylococcus_#_aureus_!_M1275_{_genomic_}_scaffold_acumX-supercont1.4_whole_genome_shotgun_sequence|gi|487397585|ref|NZ_KB822133.1|	0.888	99.112	400	44652	45052
Staphylococcus_#_aureus_!_M1277_{_genomic_}_scaffold_acung-supercont1.3_whole_genome_shotgun_sequence|gi|486755031|ref|NZ_KB822138.1|	0.066	99.934	400	603076	603476
Staphylococcus_#_aureus_!_M1286_{_genomic_}_scaffold_acuob-supercont1.2_whole_genome_shotgun_sequence|gi|487398088|ref|NZ_KB822148.1|	0.116	99.884	400	343943	344343
Staphylococcus_#_aureus_!_M1291_{_genomic_}_scaffold_acumW-supercont1.6_whole_genome_shotgun_sequence|gi|486811309|ref|NZ_KB822171.1|	0.033	99.967	400	1227807	1228207
Staphylococcus_#_aureus_!_M1320_{_genomic_}_scaffold_acumx-supercont1.4_whole_genome_shotgun_sequence|gi|486880809|ref|NZ_KB822185.1|	0.037	99.963	400	1075967	1076367
Staphylococcus_#_aureus_!_M1405_{_genomic_}_scaffold_acumh-supercont1.2_whole_genome_shotgun_sequence|gi|487398963|ref|NZ_KB822542.1|	0.116	99.884	400	343658	344058
Staphylococcus_#_aureus_!_M1405_{_genomic_}_scaffold_acumh-supercont1.6_whole_genome_shotgun_sequence|gi|487399112|ref|NZ_KB822546.1|	0.293	99.707	400	136004	136404
Staphylococcus_#_aureus_!_M1450_{_genomic_}_scaffold_acumw-supercont1.2_whole_genome_shotgun_sequence|gi|487103986|ref|NZ_KB822233.1|	0.116	99.884	400	343088	343488
Staphylococcus_#_aureus_!_M1463_{_genomic_}_scaffold_acums-supercont1.2_whole_genome_shotgun_sequence|gi|487135933|ref|NZ_KB822557.1|	0.116	99.884	400	343082	343482
Staphylococcus_#_aureus_!_M1481_{_genomic_}_scaffold_aculQ-supercont1.1_whole_genome_shotgun_sequence|gi|487136514|ref|NZ_KB822248.1|	0.116	99.884	400	342998	343398
Staphylococcus_#_aureus_!_M1510_{_genomic_}_scaffold_aculM-supercont1.4_whole_genome_shotgun_sequence|gi|487399562|ref|NZ_KB822260.1|	0.216	99.784	400	184693	185093
Staphylococcus_#_aureus_!_M1510_{_genomic_}_scaffold_aculM-supercont1.5_whole_genome_shotgun_sequence|gi|487399617|ref|NZ_KB822261.1|	0.054	99.946	400	745336	745736
Staphylococcus_#_aureus_!_M1521_{_genomic_}_scaffold_acunr-supercont1.5_whole_genome_shotgun_sequence|gi|487137481|ref|NZ_KB822272.1|	2.197	97.803	400	17807	18207
Staphylococcus_#_aureus_!_M1531_{_genomic_}_scaffold_acunL-supercont1.3_whole_genome_shotgun_sequence|gi|487137976|ref|NZ_KB822265.1|	0.871	99.129	400	45526	45926
Staphylococcus_#_aureus_!_M1556_{_genomic_}_scaffold_acund-supercont1.1_whole_genome_shotgun_sequence|gi|487139555|ref|NZ_KB822292.1|	0.047	99.953	400	849481	849881
Staphylococcus_#_aureus_!_M1556_{_genomic_}_scaffold_acund-supercont1.5_whole_genome_shotgun_sequence|gi|487139808|ref|NZ_KB822296.1|	0.141	99.859	400	283599	283999
Staphylococcus_#_aureus_!_M1556_{_genomic_}_scaffold_acund-supercont1.6_whole_genome_shotgun_sequence|gi|487139877|ref|NZ_KB822297.1|	0.062	99.938	400	643153	643553
Staphylococcus_#_aureus_!_plasmid_{_SAP077B_}_complete_sequence|gi|260667563|ref|NC_013341.1|	2.998	97.002	400	12942	13342
Staphylococcus_#_aureus_!_plasmid_{_pSK41_}_complete_sequence|gi|32470385|ref|NC_005024.1|	0.861	99.139	400	46045	46445
Staphylococcus_#_aureus_!_subsp._{_aureus_}_55/2053_genomic_scaffold_supercont1.14_whole_genome_shotgun_sequence|gi|257426105|ref|NZ_GG700546.1|	0.522	99.478	400	76190	76590
Staphylococcus_#_aureus_!_subsp._{_aureus_}_68-397_genomic_scaffold_supercont1.12_whole_genome_shotgun_sequence|gi|257431274|ref|NZ_GG700585.1|	0.448	99.552	400	88924	89324
Staphylococcus_#_aureus_!_subsp._{_aureus_}_68-397_genomic_scaffold_supercont1.14_whole_genome_shotgun_sequence|gi|257431371|ref|NZ_GG700587.1|	0.506	99.494	400	78646	79046
Staphylococcus_#_aureus_!_subsp._{_aureus_}_Btn1260_genomic_scaffold_supercont1.10_whole_genome_shotgun_sequence|gi|282906262|ref|NZ_GG730265.1|	0.278	99.722	400	143414	143814
Staphylococcus_#_aureus_!_subsp._{_aureus_}_C101_genomic_scaffold_supercont1.14_whole_genome_shotgun_sequence|gi|282925097|ref|NZ_GG730133.1|	0.448	99.552	400	88981	89381
Staphylococcus_#_aureus_!_subsp._{_aureus_}_D139_genomic_scaffold_supercont1.2_whole_genome_shotgun_sequence|gi|282915416|ref|NZ_GG730160.1|	25.707	74.293	400	1156	1556
Staphylococcus_#_aureus_!_subsp._{_aureus_}_M1015_genomic_scaffold_supercont1.12_whole_genome_shotgun_sequence|gi|293539290|ref|NZ_GG749007.1|	0.447	99.553	400	89060	89460
Staphylococcus_#_aureus_!_subsp._{_aureus_}_M876_genomic_scaffold_supercont1.11_whole_genome_shotgun_sequence|gi|257436896|ref|NZ_GG700624.1|	0.447	99.553	400	89004	89404
Staphylococcus_#_aureus_!_subsp._{_aureus_}_M876_genomic_scaffold_supercont1.12_whole_genome_shotgun_sequence|gi|257436992|ref|NZ_GG700625.1|	0.5	99.5	400	79625	80025
Staphylococcus_#_aureus_!_subsp._{_aureus_}_M899_genomic_scaffold_supercont1.9_whole_genome_shotgun_sequence|gi|282914656|ref|NZ_GG730198.1|	0.447	99.553	400	89151	89551
Staphylococcus_#_aureus_!_subsp._{_aureus_}_MRSA131_genomic_scaffold_Scfld78_whole_genome_shotgun_sequence|gi|422745396|ref|NZ_GL638174.1|	3.828	96.172	400	10050	10450
Staphylococcus_#_aureus_!_subsp._{_aureus_}_MRSA177_genomic_scaffold_Scfld43_whole_genome_shotgun_sequence|gi|422742736|ref|NZ_GL638206.1|	3.828	96.172	400	10050	10450
Staphylococcus_#_aureus_!_subsp._{_aureus_}_MRSA177_genomic_scaffold_Scfld53_whole_genome_shotgun_sequence|gi|422742863|ref|NZ_GL638209.1|	0.456	99.544	400	87360	87760
Staphylococcus_#_lugdunensis_!_M23590_{_genomic_}_scaffold_SCAFFOLD7_whole_genome_shotgun_sequence|gi|319430690|ref|NZ_GL622357.1|	23.966	76.034	400	1269	1669
Staphylococcus_#_sp._!_HGB0015_{_genomic_}_scaffold_aczIz-supercont1.3_whole_genome_shotgun_sequence|gi|512478285|ref|NZ_KE150419.1|	0.966	99.034	400	40991	41391
Streptococcus_#_oralis_!_Uo5_{_complete_}_genome|gi|331265438|ref|NC_015291.1|	0.02	99.98	400	1958290	1958690
Streptococcus_#_pneumoniae_!_CGSP14_{_chromosome_}_complete_genome|gi|182682970|ref|NC_010582.1|	0.018	99.982	400	2208798	2209198
Streptococcus_#_pneumoniae_!_G54_{_chromosome_}_complete_genome|gi|194396645|ref|NC_011072.1|	0.019	99.981	400	2078553	2078953
Streptococcus_#_pneumoniae_!_SPN994039_{_draft_}_genome|gi|480530348|ref|NC_021005.1|	0.02	99.98	400	2026105	2026505
Streptococcus_#_suis_!_BM407_{_chromosome_}_complete_genome|gi|253754647|ref|NC_012926.1|	0.019	99.981	400	2145829	2146229
Streptococcus_#_suis_!_ST3_{_chromosome_}_complete_genome|gi|330831849|ref|NC_015433.1|	0.02	99.98	400	2028415	2028815
Staphylococcus_#_aureus_!_M1061_{_genomic_}_scaffold_aculN-supercont1.2_whole_genome_shotgun_sequence|gi|487393369|ref|NZ_KB821893.1|	2.597	97.403	399	14965	15364
Staphylococcus_#_aureus_!_subsp._{_aureus_}_MRSA131_genomic_scaffold_Scfld60_whole_genome_shotgun_sequence|gi|422745364|ref|NZ_GL638173.1|	1.199	98.801	387	31877	32264
Staphylococcus_#_aureus_!_subsp._{_aureus_}_MRSA177_genomic_scaffold_Scfld212_whole_genome_shotgun_sequence|gi|422743864|ref|NZ_GL638227.1|	2.193	97.807	387	17264	17651
Staphylococcus_#_aureus_!_subsp._{_aureus_}_MRSA177_genomic_scaffold_Scfld67_whole_genome_shotgun_sequence|gi|422743115|ref|NZ_GL638215.1|	1.199	98.801	387	31877	32264
Staphylococcus_#_aureus_!_plasmid_{_SAP019A_}_complete_sequence|gi|260666193|ref|NC_013322.1|	1.374	98.626	377	27058	27435
Staphylococcus_#_aureus_!_plasmid_{_SAP076A_}_complete_sequence|gi|260667562|ref|NC_013340.1|	1.074	98.926	377	34737	35114
Staphylococcus_#_aureus_!_plasmid_{_SAP077A_}_complete_sequence|gi|410108961|ref|NC_018965.1|	1.062	98.938	377	35133	35510
Staphylococcus_#_aureus_!_plasmid_{_SAP078A_}_complete_sequence|gi|410108982|ref|NC_019009.1|	1.062	98.938	377	35131	35508
Staphylococcus_#_epidermidis_!_M0881_{_genomic_}_scaffold_acumm-supercont1.2_whole_genome_shotgun_sequence|gi|489046772|ref|NZ_KB821722.1|	0.039	99.961	355	900114	900469
Staphylococcus_#_aureus_!_M0200_{_genomic_}_scaffold_acumC-supercont1.11_whole_genome_shotgun_sequence|gi|487360329|ref|NZ_KB821094.1|	0.859	99.141	310	35794	36104
Staphylococcus_#_aureus_!_M0489_{_genomic_}_scaffold_acsPG-supercont1.2_whole_genome_shotgun_sequence|gi|486316150|ref|NZ_KB821393.1|	0.089	99.911	310	347717	348027
Staphylococcus_#_aureus_!_M0660_{_genomic_}_scaffold_acumg-supercont1.9_whole_genome_shotgun_sequence|gi|487381619|ref|NZ_KB821545.1|	0.133	99.867	310	232898	233208
Staphylococcus_#_aureus_!_M1015_{_genomic_}_scaffold_acvqH-supercont1.2_whole_genome_shotgun_sequence|gi|486403896|ref|NZ_KB821835.1|	0.096	99.904	310	323124	323434
Staphylococcus_#_aureus_!_B147830_{_genomic_}_scaffold_acqwB-supercont1.7_whole_genome_shotgun_sequence|gi|486333606|ref|NZ_KB822317.1|	0.041	99.959	301	738301	738602
Staphylococcus_#_aureus_!_M0108_{_genomic_}_scaffold_acunZ-supercont1.4_whole_genome_shotgun_sequence|gi|487358654|ref|NZ_KB821036.1|	0.051	99.949	301	590697	590998
Staphylococcus_#_aureus_!_M0565_{_genomic_}_scaffold_acvqE-supercont1.3_whole_genome_shotgun_sequence|gi|486354564|ref|NZ_KB821481.1|	0.037	99.963	301	809282	809583
Staphylococcus_#_aureus_!_M0780_{_genomic_}_scaffold_acvqm-supercont1.3_whole_genome_shotgun_sequence|gi|486376198|ref|NZ_KB821664.1|	0.037	99.963	301	803482	803783
Staphylococcus_#_aureus_!_M0927_{_genomic_}_scaffold_aculU-supercont1.4_whole_genome_shotgun_sequence|gi|487387406|ref|NZ_KB821754.1|	0.037	99.963	301	804721	805022
Staphylococcus_#_aureus_!_M0946_{_genomic_}_scaffold_acunJ-supercont1.1_whole_genome_shotgun_sequence|gi|487387792|ref|NZ_KB821785.1|	0.74	99.26	301	40394	40695
Staphylococcus_#_aureus_!_M1037_{_genomic_}_scaffold_acvqz-supercont1.3_whole_genome_shotgun_sequence|gi|486410440|ref|NZ_KB821922.1|	0.037	99.963	301	808811	809112
Staphylococcus_#_aureus_!_M1062_{_genomic_}_scaffold_aculY-supercont1.3_whole_genome_shotgun_sequence|gi|487394159|ref|NZ_KB821914.1|	0.037	99.963	301	809347	809648
Staphylococcus_#_aureus_!_M1068_{_genomic_}_scaffold_acunM-supercont1.3_whole_genome_shotgun_sequence|gi|487394470|ref|NZ_KB821929.1|	0.037	99.963	301	804662	804963
Staphylococcus_#_aureus_!_M1198_{_genomic_}_scaffold_acumf-supercont1.1_whole_genome_shotgun_sequence|gi|486435575|ref|NZ_KB822051.1|	0.028	99.972	301	1061114	1061415
Staphylococcus_#_aureus_!_M1450_{_genomic_}_scaffold_acumw-supercont1.3_whole_genome_shotgun_sequence|gi|487109353|ref|NZ_KB822234.1|	0.037	99.963	301	804258	804559
Staphylococcus_#_aureus_!_M1463_{_genomic_}_scaffold_acums-supercont1.3_whole_genome_shotgun_sequence|gi|487136072|ref|NZ_KB822558.1|	0.037	99.963	301	805341	805642
Staphylococcus_#_aureus_!_subsp._{_aureus_}_55/2053_genomic_scaffold_supercont1.2_whole_genome_shotgun_sequence|gi|257424591|ref|NZ_GG700534.1|	0.776	99.224	301	38502	38803
Staphylococcus_#_aureus_!_subsp._{_aureus_}_58-424_genomic_scaffold_supercont1.5_whole_genome_shotgun_sequence|gi|293500356|ref|NZ_GG749058.1|	0.765	99.235	301	39034	39335
Staphylococcus_#_aureus_!_subsp._{_aureus_}_65-1322_genomic_scaffold_supercont1.3_whole_genome_shotgun_sequence|gi|257427257|ref|NZ_GG700561.1|	0.775	99.225	301	38532	38833
Staphylococcus_#_aureus_!_subsp._{_aureus_}_68-397_genomic_scaffold_supercont1.2_whole_genome_shotgun_sequence|gi|257429893|ref|NZ_GG700575.1|	0.775	99.225	301	38532	38833
Staphylococcus_#_aureus_!_subsp._{_aureus_}_A017934/97_genomic_scaffold_supercont1.2_whole_genome_shotgun_sequence|gi|283957268|ref|NZ_GG731496.1|	0.766	99.234	301	39007	39308
Staphylococcus_#_aureus_!_subsp._{_aureus_}_ATCC_51811_genomic_scaffold_SCAFFOLD11_whole_genome_shotgun_sequence|gi|297210129|ref|NZ_GG774490.1|	0.772	99.228	301	38696	38997
Staphylococcus_#_aureus_!_subsp._{_aureus_}_Btn1260_genomic_scaffold_supercont1.2_whole_genome_shotgun_sequence|gi|282904855|ref|NZ_GG730257.1|	0.766	99.234	301	39005	39306
Staphylococcus_#_aureus_!_subsp._{_aureus_}_C101_genomic_scaffold_supercont1.3_whole_genome_shotgun_sequence|gi|282923011|ref|NZ_GG730122.1|	0.775	99.225	301	38554	38855
Staphylococcus_#_aureus_!_subsp._{_aureus_}_C160_genomic_scaffold_supercont1.3_whole_genome_shotgun_sequence|gi|282903064|ref|NZ_GG730275.1|	0.765	99.235	301	39052	39353
Staphylococcus_#_aureus_!_subsp._{_aureus_}_C427_genomic_scaffold_supercont1.3_whole_genome_shotgun_sequence|gi|282918260|ref|NZ_GG730143.1|	0.775	99.225	301	38518	38819
Staphylococcus_#_aureus_!_subsp._{_aureus_}_E1410_genomic_scaffold_supercont1.3_whole_genome_shotgun_sequence|gi|257432596|ref|NZ_GG700599.1|	0.776	99.224	301	38497	38798
Staphylococcus_#_aureus_!_subsp._{_aureus_}_EMRSA16_genomic_scaffold_supercont1.5_whole_genome_shotgun_sequence|gi|295427014|ref|NZ_GG770517.1|	0.766	99.234	301	39011	39312
Staphylococcus_#_aureus_!_subsp._{_aureus_}_M1015_genomic_scaffold_supercont1.1_whole_genome_shotgun_sequence|gi|293515882|ref|NZ_GG748996.1|	0.775	99.225	301	38532	38833
Staphylococcus_#_aureus_!_subsp._{_aureus_}_M809_genomic_scaffold_supercont1.1_whole_genome_shotgun_sequence|gi|293509181|ref|NZ_GG749299.1|	0.57	99.43	301	52482	52783
Staphylococcus_#_aureus_!_subsp._{_aureus_}_M809_genomic_scaffold_supercont1.3_whole_genome_shotgun_sequence|gi|293509294|ref|NZ_GG749301.1|	0.79	99.21	301	37810	38111
Staphylococcus_#_aureus_!_subsp._{_aureus_}_M876_genomic_scaffold_supercont1.3_whole_genome_shotgun_sequence|gi|257435501|ref|NZ_GG700616.1|	0.776	99.224	301	38500	38801
Staphylococcus_#_aureus_!_subsp._{_aureus_}_M899_genomic_scaffold_supercont1.11_whole_genome_shotgun_sequence|gi|282914756|ref|NZ_GG730200.1|	1.117	98.883	301	26650	26951
Staphylococcus_#_aureus_!_subsp._{_aureus_}_M899_genomic_scaffold_supercont1.3_whole_genome_shotgun_sequence|gi|282913306|ref|NZ_GG730192.1|	0.775	99.225	301	38536	38837
Staphylococcus_#_aureus_!_subsp._{_aureus_}_WBG10049_genomic_scaffold_supercont1.1_whole_genome_shotgun_sequence|gi|282910118|ref|NZ_GG730208.1|	0.776	99.224	301	38503	38804
Staphylococcus_#_aureus_!_subsp._{_aureus_}_WW2703/97_genomic_scaffold_supercont1.6_whole_genome_shotgun_sequence|gi|282907805|ref|NZ_GG730225.1|	0.848	99.152	301	35189	35490
Bacillus_#_cereus_!_BAG1X2-2_{_genomic_}_scaffold_achrl-supercont1.1_whole_genome_shotgun_sequence|gi|506995866|ref|NZ_KB976220.1|	0.006	99.994	300	5320006	5320306
Bacillus_#_cereus_!_BAG3O-1_{_genomic_}_scaffold_acqxM-supercont1.2_whole_genome_shotgun_sequence|gi|507064755|ref|NZ_KB976980.1|	0.006	99.994	300	4726124	4726424
Bacillus_#_cereus_!_HuA2-3_{_genomic_}_scaffold_acrHg-supercont1.2_whole_genome_shotgun_sequence|gi|507018610|ref|NZ_KB976664.1|	0.17	99.83	300	176323	176623
Bacillus_#_cereus_!_HuA2-3_{_genomic_}_scaffold_acrHg-supercont1.4_whole_genome_shotgun_sequence|gi|507018639|ref|NZ_KB976666.1|	0.139	99.861	300	215475	215775
Bacillus_#_cereus_!_HuB4-4_{_genomic_}_scaffold_acqVu-supercont1.1_whole_genome_shotgun_sequence|gi|507027221|ref|NZ_KB976537.1|	0.005	99.995	300	5676424	5676724
Bacillus_#_cereus_!_IS195_{_genomic_}_scaffold_acqVz-supercont1.1_whole_genome_shotgun_sequence|gi|507027792|ref|NZ_KB976325.1|	0.013	99.987	300	2226294	2226594
Bacillus_#_cereus_!_MSX-A1_{_genomic_}_scaffold_supercont1.1_whole_genome_shotgun_sequence|gi|423560596|ref|NZ_JH792104.1|	0.006	99.994	300	4858496	4858796
Bacillus_#_cereus_!_TIAC219_{_genomic_}_scaffold_actab-supercont2.4_whole_genome_shotgun_sequence|gi|505484194|ref|NZ_KB976039.1|	0.065	99.935	300	461227	461527
Bacillus_#_cereus_!_VD021_{_genomic_}_scaffold_acqVy-supercont1.8_whole_genome_shotgun_sequence|gi|507031567|ref|NZ_KB976285.1|	0.115	99.885	300	259538	259838
Bacillus_#_cereus_!_VD048_{_genomic_}_scaffold_supercont1.7_whole_genome_shotgun_sequence|gi|423596849|ref|NZ_JH792316.1|	0.237	99.763	300	126293	126593
Bacillus_#_cereus_!_VD102_{_genomic_}_scaffold_supercont1.1_whole_genome_shotgun_sequence|gi|423603419|ref|NZ_JH792239.1|	0.006	99.994	300	4634662	4634962
Bacillus_#_cereus_!_VD107_{_genomic_}_scaffold_supercont1.5_whole_genome_shotgun_sequence|gi|423614469|ref|NZ_JH792236.1|	0.182	99.818	300	164505	164805
Bacillus_#_cereus_!_VD131_{_genomic_}_scaffold_acrHi-supercont1.5_whole_genome_shotgun_sequence|gi|507035795|ref|NZ_KB976656.1|	0.124	99.876	300	240679	240979
Bacillus_#_cereus_!_VD142_{_genomic_}_scaffold_actaa-supercont2.9_whole_genome_shotgun_sequence|gi|514343587|ref|NZ_KE150052.1|	0.295	99.705	300	101270	101570
Bacillus_#_cereus_!_VD156_{_genomic_}_scaffold_supercont1.1_whole_genome_shotgun_sequence|gi|423633591|ref|NZ_JH791865.1|	0.007	99.993	300	4398247	4398547
Bacillus_#_cereus_!_VDM006_{_genomic_}_scaffold_acrHb-supercont1.1_whole_genome_shotgun_sequence|gi|507060269|ref|NZ_KB976864.1|	0.056	99.944	300	537895	538195
Bacillus_#_cereus_!_VDM019_{_genomic_}_scaffold_achrj-supercont1.2_whole_genome_shotgun_sequence|gi|507056808|ref|NZ_KB976199.1|	0.042	99.958	300	706103	706403
Bacillus_#_cereus_!_VDM022_{_genomic_}_scaffold_supercont1.2_whole_genome_shotgun_sequence|gi|423664302|ref|NZ_JH791838.1|	0.066	99.934	300	452564	452864
Bacillus_#_cereus_!_VDM034_{_genomic_}_scaffold_supercont1.1_whole_genome_shotgun_sequence|gi|423666303|ref|NZ_JH791809.1|	0.006	99.994	300	4767624	4767924
Bacillus_#_cereus_!_VDM034_{_genomic_}_scaffold_supercont1.3_whole_genome_shotgun_sequence|gi|423671527|ref|NZ_JH791811.1|	0.069	99.931	300	435070	435370
Bacillus_#_cereus_!_str._{_Schrouff_}_genomic_scaffold_acsZZ-supercont2.5_whole_genome_shotgun_sequence|gi|506987208|ref|NZ_KB976120.1|	0.143	99.857	300	210101	210401
Bacillus_#_sp._!_37MA_{_A3M5DRAFT_scaffold1.1_}_whole_genome_shotgun_sequence|gi|483722481|ref|NZ_KB889752.1|	0.008	99.992	300	3763747	3764047
Bacillus_#_thuringiensis_!_serovar_{_pakistani_}_str._T13001_chromosome_whole_genome_shotgun_sequence|gi|238801502|ref|NZ_CM000750.1|	0.005	99.995	300	6037213	6037513
Bacillus_#_vallismortis_!_DV1-F-3_{_genomic_}_scaffold_scf7180000000948_whole_genome_shotgun_sequence|gi|397738381|ref|NZ_JH600273.1|	0.16	99.84	300	187489	187789
Leuconostoc_#_sp._!_C2_{_chromosome_}_complete_genome|gi|339490182|ref|NC_015734.1|	0.016	99.984	300	1876973	1877273
Staphylococcus_#_aureus_!_M0001_{_genomic_}_scaffold_acrHn-supercont1.12_whole_genome_shotgun_sequence|gi|486217704|ref|NZ_KB820930.1|	1.76	98.24	300	16748	17048
Staphylococcus_#_aureus_!_M0006_{_genomic_}_scaffold_aculO-supercont1.1_whole_genome_shotgun_sequence|gi|487242216|ref|NZ_KB820952.1|	0.023	99.977	300	1297627	1297927
Staphylococcus_#_aureus_!_M0066_{_genomic_}_scaffold_acqxs-supercont1.4_whole_genome_shotgun_sequence|gi|486238184|ref|NZ_KB820996.1|	0.075	99.925	300	397719	398019
Staphylococcus_#_aureus_!_M0102_{_genomic_}_scaffold_acqwC-supercont1.6_whole_genome_shotgun_sequence|gi|486241470|ref|NZ_KB821011.1|	0.036	99.964	300	831110	831410
Staphylococcus_#_aureus_!_M0103_{_genomic_}_scaffold_acqxd-supercont1.5_whole_genome_shotgun_sequence|gi|486246766|ref|NZ_KB821018.1|	0.1	99.9	300	300262	300562
Staphylococcus_#_aureus_!_M0200_{_genomic_}_scaffold_acumC-supercont1.7_whole_genome_shotgun_sequence|gi|487360592|ref|NZ_KB821102.1|	0.102	99.898	300	294404	294704
Staphylococcus_#_aureus_!_M0221_{_genomic_}_scaffold_acqxa-supercont1.1_whole_genome_shotgun_sequence|gi|486258704|ref|NZ_KB821123.1|	1.784	98.216	300	16513	16813
Staphylococcus_#_aureus_!_M0240_{_genomic_}_scaffold_acqwO-supercont1.5_whole_genome_shotgun_sequence|gi|487374265|ref|NZ_KB821149.1|	0.07	99.93	300	426298	426598
Staphylococcus_#_aureus_!_M0340_{_genomic_}_scaffold_acqxN-supercont1.1_whole_genome_shotgun_sequence|gi|486279730|ref|NZ_KB821241.1|	1.778	98.222	300	16569	16869
Staphylococcus_#_aureus_!_M0375_{_genomic_}_scaffold_acunY-supercont1.8_whole_genome_shotgun_sequence|gi|487366811|ref|NZ_KB821294.1|	0.464	99.536	300	64302	64602
Staphylococcus_#_aureus_!_M0415_{_genomic_}_scaffold_acrGP-supercont1.1_whole_genome_shotgun_sequence|gi|487379100|ref|NZ_KB821317.1|	0.024	99.976	300	1227814	1228114
Staphylococcus_#_aureus_!_M0415_{_genomic_}_scaffold_acrGP-supercont1.6_whole_genome_shotgun_sequence|gi|487379309|ref|NZ_KB821322.1|	0.086	99.914	300	348837	349137
Staphylococcus_#_aureus_!_M0438_{_genomic_}_scaffold_acuml-supercont1.4_whole_genome_shotgun_sequence|gi|487368753|ref|NZ_KB821353.1|	0.027	99.973	300	1104567	1104867
Staphylococcus_#_aureus_!_M0468_{_genomic_}_scaffold_acqxk-supercont1.1_whole_genome_shotgun_sequence|gi|486308227|ref|NZ_KB821358.1|	1.778	98.222	300	16569	16869
Staphylococcus_#_aureus_!_M0489_{_genomic_}_scaffold_acsPG-supercont1.7_whole_genome_shotgun_sequence|gi|486317430|ref|NZ_KB821398.1|	0.088	99.912	300	339353	339653
Staphylococcus_#_aureus_!_M0528_{_genomic_}_scaffold_acvqo-supercont1.6_whole_genome_shotgun_sequence|gi|486339196|ref|NZ_KB821427.1|	0.085	99.915	300	351229	351529
Staphylococcus_#_aureus_!_M0536_{_genomic_}_scaffold_acvqu-supercont1.1_whole_genome_shotgun_sequence|gi|486343984|ref|NZ_KB821466.1|	0.06	99.94	300	501028	501328
Staphylococcus_#_aureus_!_M0539_{_genomic_}_scaffold_acvqn-supercont1.12_whole_genome_shotgun_sequence|gi|486347810|ref|NZ_KB821453.1|	0.101	99.899	300	298103	298403
Staphylococcus_#_aureus_!_M0539_{_genomic_}_scaffold_acvqn-supercont1.6_whole_genome_shotgun_sequence|gi|486349305|ref|NZ_KB821462.1|	2.156	97.844	300	13616	13916
Staphylococcus_#_aureus_!_M0547_{_genomic_}_scaffold_acvqJ-supercont1.1_whole_genome_shotgun_sequence|gi|486350836|ref|NZ_KB821442.1|	0.023	99.977	300	1303109	1303409
Staphylococcus_#_aureus_!_M0565_{_genomic_}_scaffold_acvqE-supercont1.4_whole_genome_shotgun_sequence|gi|486354622|ref|NZ_KB821482.1|	0.116	99.884	300	258283	258583
Staphylococcus_#_aureus_!_M0646_{_genomic_}_scaffold_acuoa-supercont1.1_whole_genome_shotgun_sequence|gi|487380551|ref|NZ_KB821512.1|	0.022	99.978	300	1368566	1368866
Staphylococcus_#_aureus_!_M0660_{_genomic_}_scaffold_acumg-supercont1.7_whole_genome_shotgun_sequence|gi|487381565|ref|NZ_KB821543.1|	2.448	97.552	300	11957	12257
Staphylococcus_#_aureus_!_M0663_{_genomic_}_scaffold_acuoc-supercont1.7_whole_genome_shotgun_sequence|gi|487382156|ref|NZ_KB821558.1|	0.102	99.898	300	293351	293651
Staphylococcus_#_aureus_!_M0673_{_genomic_}_scaffold_acumv-supercont1.2_whole_genome_shotgun_sequence|gi|487382376|ref|NZ_KB821563.1|	0.036	99.964	300	843152	843452
Staphylococcus_#_aureus_!_M0673_{_genomic_}_scaffold_acumv-supercont1.9_whole_genome_shotgun_sequence|gi|487382728|ref|NZ_KB821570.1|	0.047	99.953	300	632282	632582
Staphylococcus_#_aureus_!_M0692_{_genomic_}_scaffold_acvqM-supercont1.4_whole_genome_shotgun_sequence|gi|486369161|ref|NZ_KB821590.1|	0.086	99.914	300	349358	349658
Staphylococcus_#_aureus_!_M0719_{_genomic_}_scaffold_acvrc-supercont1.6_whole_genome_shotgun_sequence|gi|480446232|ref|NZ_KB821621.1|	0.103	99.897	300	290734	291034
Staphylococcus_#_aureus_!_M0792_{_genomic_}_scaffold_acuni-supercont1.6_whole_genome_shotgun_sequence|gi|487383103|ref|NZ_KB821676.1|	0.116	99.884	300	258884	259184
Staphylococcus_#_aureus_!_M0822_{_genomic_}_scaffold_acunB-supercont1.2_whole_genome_shotgun_sequence|gi|487383547|ref|NZ_KB821681.1|	0.087	99.913	300	345682	345982
Staphylococcus_#_aureus_!_M0823_{_genomic_}_scaffold_acvqk-supercont1.3_whole_genome_shotgun_sequence|gi|486382297|ref|NZ_KB821693.1|	0.086	99.914	300	347001	347301
Staphylococcus_#_aureus_!_M0871_{_genomic_}_scaffold_acumy-supercont1.2_whole_genome_shotgun_sequence|gi|487384489|ref|NZ_KB821702.1|	0.053	99.947	300	561245	561545
Staphylococcus_#_aureus_!_M0927_{_genomic_}_scaffold_aculU-supercont1.3_whole_genome_shotgun_sequence|gi|487387237|ref|NZ_KB821753.1|	0.087	99.913	300	343217	343517
Staphylococcus_#_aureus_!_M0927_{_genomic_}_scaffold_aculU-supercont1.7_whole_genome_shotgun_sequence|gi|487387530|ref|NZ_KB821757.1|	0.219	99.781	300	136695	136995
Staphylococcus_#_aureus_!_M0943_{_genomic_}_scaffold_acvqw-supercont1.2_whole_genome_shotgun_sequence|gi|486390443|ref|NZ_KB821766.1|	0.076	99.924	300	392470	392770
Staphylococcus_#_aureus_!_M0943_{_genomic_}_scaffold_acvqw-supercont1.5_whole_genome_shotgun_sequence|gi|486392135|ref|NZ_KB821769.1|	0.041	99.959	300	739683	739983
Staphylococcus_#_aureus_!_M0964_{_genomic_}_scaffold_aculV-supercont1.6_whole_genome_shotgun_sequence|gi|487389654|ref|NZ_KB821806.1|	0.062	99.938	300	482663	482963
Staphylococcus_#_aureus_!_M0978_{_genomic_}_scaffold_acunG-supercont1.6_whole_genome_shotgun_sequence|gi|487390132|ref|NZ_KB821776.1|	0.124	99.876	300	241386	241686
Staphylococcus_#_aureus_!_M1015_{_genomic_}_scaffold_acvqH-supercont1.7_whole_genome_shotgun_sequence|gi|486405285|ref|NZ_KB821840.1|	0.049	99.951	300	618249	618549
Staphylococcus_#_aureus_!_M1016_{_genomic_}_scaffold_acvqx-supercont1.5_whole_genome_shotgun_sequence|gi|486406776|ref|NZ_KB821846.1|	0.022	99.978	300	1371478	1371778
Staphylococcus_#_aureus_!_M1037_{_genomic_}_scaffold_acvqz-supercont1.2_whole_genome_shotgun_sequence|gi|486409891|ref|NZ_KB821921.1|	0.087	99.913	300	343270	343570
Staphylococcus_#_aureus_!_M1044_{_genomic_}_scaffold_acumE-supercont1.11_whole_genome_shotgun_sequence|gi|487392161|ref|NZ_KB821873.1|	0.048	99.952	300	628339	628639
Staphylococcus_#_aureus_!_M1044_{_genomic_}_scaffold_acumE-supercont1.4_whole_genome_shotgun_sequence|gi|487392577|ref|NZ_KB821884.1|	0.088	99.912	300	341519	341819
Staphylococcus_#_aureus_!_M1044_{_genomic_}_scaffold_acumE-supercont1.5_whole_genome_shotgun_sequence|gi|487392674|ref|NZ_KB821885.1|	0.124	99.876	300	241258	241558
Staphylococcus_#_aureus_!_M1044_{_genomic_}_scaffold_acumE-supercont1.7_whole_genome_shotgun_sequence|gi|487392928|ref|NZ_KB821887.1|	0.101	99.899	300	297330	297630
Staphylococcus_#_aureus_!_M1063_{_genomic_}_scaffold_acumZ-supercont1.10_whole_genome_shotgun_sequence|gi|486415432|ref|NZ_KB821902.1|	0.29	99.71	300	103241	103541
Staphylococcus_#_aureus_!_M1068_{_genomic_}_scaffold_acunM-supercont1.2_whole_genome_shotgun_sequence|gi|487394397|ref|NZ_KB821928.1|	0.087	99.913	300	345696	345996
Staphylococcus_#_aureus_!_M1078_{_genomic_}_scaffold_aculT-supercont1.1_whole_genome_shotgun_sequence|gi|487400724|ref|NZ_KB822362.1|	0.054	99.946	300	555676	555976
Staphylococcus_#_aureus_!_M1083_{_genomic_}_scaffold_acumj-supercont1.2_whole_genome_shotgun_sequence|gi|487394735|ref|NZ_KB821968.1|	0.053	99.947	300	568792	569092
Staphylococcus_#_aureus_!_M1083_{_genomic_}_scaffold_acumj-supercont1.4_whole_genome_shotgun_sequence|gi|487394837|ref|NZ_KB821970.1|	0.155	99.845	300	192637	192937
Staphylococcus_#_aureus_!_M1083_{_genomic_}_scaffold_acumj-supercont1.6_whole_genome_shotgun_sequence|gi|487394925|ref|NZ_KB821972.1|	0.042	99.958	300	717133	717433
Staphylococcus_#_aureus_!_M1092_{_genomic_}_scaffold_acunK-supercont1.3_whole_genome_shotgun_sequence|gi|486422239|ref|NZ_KB821959.1|	0.087	99.913	300	342587	342887
Staphylococcus_#_aureus_!_M1126_{_genomic_}_scaffold_acumd-supercont1.1_whole_genome_shotgun_sequence|gi|487395815|ref|NZ_KB821991.1|	0.067	99.933	300	449371	449671
Staphylococcus_#_aureus_!_M1126_{_genomic_}_scaffold_acumd-supercont1.3_whole_genome_shotgun_sequence|gi|487395891|ref|NZ_KB822000.1|	0.087	99.913	300	343605	343905
Staphylococcus_#_aureus_!_M1126_{_genomic_}_scaffold_acumd-supercont1.8_whole_genome_shotgun_sequence|gi|487395988|ref|NZ_KB822005.1|	0.038	99.962	300	784631	784931
Staphylococcus_#_aureus_!_M1167_{_genomic_}_scaffold_acuns-supercont1.2_whole_genome_shotgun_sequence|gi|486431800|ref|NZ_KB822043.1|	0.087	99.913	300	343304	343604
Staphylococcus_#_aureus_!_M1167_{_genomic_}_scaffold_acuns-supercont1.8_whole_genome_shotgun_sequence|gi|486432899|ref|NZ_KB822049.1|	0.039	99.961	300	777992	778292
Staphylococcus_#_aureus_!_M1248_{_genomic_}_scaffold_acunw-supercont1.7_whole_genome_shotgun_sequence|gi|486655743|ref|NZ_KB822105.1|	0.038	99.962	300	798950	799250
Staphylococcus_#_aureus_!_M1257_{_genomic_}_scaffold_acumo-supercont1.4_whole_genome_shotgun_sequence|gi|486728319|ref|NZ_KB822128.1|	0.028	99.972	300	1082568	1082868
Staphylococcus_#_aureus_!_M1277_{_genomic_}_scaffold_acung-supercont1.4_whole_genome_shotgun_sequence|gi|486766472|ref|NZ_KB822139.1|	0.038	99.962	300	796753	797053
Staphylococcus_#_aureus_!_M1291_{_genomic_}_scaffold_acumW-supercont1.3_whole_genome_shotgun_sequence|gi|486787193|ref|NZ_KB822168.1|	0.077	99.923	300	390378	390678
Staphylococcus_#_aureus_!_M1309_{_genomic_}_scaffold_acunC-supercont1.8_whole_genome_shotgun_sequence|gi|487398502|ref|NZ_KB822163.1|	0.051	99.949	300	593588	593888
Staphylococcus_#_aureus_!_M1320_{_genomic_}_scaffold_acumx-supercont1.2_whole_genome_shotgun_sequence|gi|486874409|ref|NZ_KB822183.1|	0.173	99.827	300	172850	173150
Staphylococcus_#_aureus_!_M1374_{_genomic_}_scaffold_acumR-supercont1.2_whole_genome_shotgun_sequence|gi|487398605|ref|NZ_KB822220.1|	0.077	99.923	300	388498	388798
Staphylococcus_#_aureus_!_M1374_{_genomic_}_scaffold_acumR-supercont1.5_whole_genome_shotgun_sequence|gi|487398667|ref|NZ_KB822223.1|	1.005	98.995	300	29540	29840
Staphylococcus_#_aureus_!_M1462_{_genomic_}_scaffold_acumH-supercont1.2_whole_genome_shotgun_sequence|gi|487135374|ref|NZ_KB822551.1|	1.769	98.231	300	16662	16962
Staphylococcus_#_aureus_!_M1463_{_genomic_}_scaffold_acums-supercont1.6_whole_genome_shotgun_sequence|gi|487136241|ref|NZ_KB822561.1|	0.177	99.823	300	169115	169415
Staphylococcus_#_aureus_!_M1531_{_genomic_}_scaffold_acunL-supercont1.1_whole_genome_shotgun_sequence|gi|487137805|ref|NZ_KB822263.1|	0.074	99.926	300	404076	404376
Staphylococcus_#_aureus_!_M1533_{_genomic_}_scaffold_aculS-supercont1.5_whole_genome_shotgun_sequence|gi|487138449|ref|NZ_KB822289.1|	0.028	99.972	300	1074775	1075075
Staphylococcus_#_aureus_!_plasmid_{_SAP052A_}_complete_sequence|gi|260667554|ref|NC_013332.1|	0.925	99.075	300	32145	32445
Staphylococcus_#_aureus_!_plasmid_{_SAP068A_}_complete_sequence|gi|260667560|ref|NC_013338.1|	0.594	99.406	300	50200	50500
Staphylococcus_#_aureus_!_plasmid_{_SAP069A_}_complete_sequence|gi|260667561|ref|NC_013339.1|	0.711	99.289	300	41898	42198
Staphylococcus_#_aureus_!_plasmid_{_SAP079A_}_complete_sequence|gi|260667564|ref|NC_013342.1|	0.634	99.366	300	47022	47322
Staphylococcus_#_aureus_!_plasmid_{_SAP080A_}_complete_sequence|gi|260667565|ref|NC_013343.1|	0.683	99.317	300	43592	43892
Staphylococcus_#_aureus_!_plasmid_{_SAP082A_}_complete_sequence|gi|260667566|ref|NC_013344.1|	0.68	99.32	300	43816	44116
Staphylococcus_#_aureus_!_plasmid_{_pSK1_}_complete_sequence|gi|302344722|ref|NC_014369.1|	1.066	98.934	300	27850	28150
Staphylococcus_#_aureus_!_plasmid_{_pWBG753_}_complete_sequence|gi|260667550|ref|NC_013328.1|	0.998	99.002	300	29747	30047
Staphylococcus_#_aureus_!_subsp._{_aureus_}_55/2053_genomic_scaffold_supercont1.8_whole_genome_shotgun_sequence|gi|257425991|ref|NZ_GG700540.1|	0.343	99.657	300	87082	87382
Staphylococcus_#_aureus_!_subsp._{_aureus_}_C101_genomic_scaffold_supercont1.7_whole_genome_shotgun_sequence|gi|282923720|ref|NZ_GG730126.1|	1.026	98.974	300	28946	29246
Staphylococcus_#_aureus_!_subsp._{_aureus_}_C427_genomic_scaffold_supercont1.2_whole_genome_shotgun_sequence|gi|282918168|ref|NZ_GG730142.1|	0.321	99.679	300	93262	93562
Staphylococcus_#_aureus_!_subsp._{_aureus_}_CM05_genomic_scaffold_Scfld10_whole_genome_shotgun_sequence|gi|424767604|ref|NZ_JH806477.1|	0.293	99.707	300	102049	102349
Staphylococcus_#_aureus_!_subsp._{_aureus_}_CM05_genomic_scaffold_Scfld150_whole_genome_shotgun_sequence|gi|424772779|ref|NZ_JH806532.1|	0.405	99.595	300	73816	74116
Staphylococcus_#_aureus_!_subsp._{_aureus_}_D139_genomic_scaffold_supercont1.10_whole_genome_shotgun_sequence|gi|282915839|ref|NZ_GG730168.1|	0.199	99.801	300	150446	150746
Staphylococcus_#_aureus_!_subsp._{_aureus_}_M1015_genomic_scaffold_supercont1.5_whole_genome_shotgun_sequence|gi|293526322|ref|NZ_GG749000.1|	1.026	98.974	300	28930	29230
Staphylococcus_#_aureus_!_subsp._{_aureus_}_M809_genomic_scaffold_supercont1.9_whole_genome_shotgun_sequence|gi|293509736|ref|NZ_GG749307.1|	1.038	98.962	300	28600	28900
Staphylococcus_#_aureus_!_subsp._{_aureus_}_M899_genomic_scaffold_supercont1.6_whole_genome_shotgun_sequence|gi|282913742|ref|NZ_GG730195.1|	1.019	98.981	300	29150	29450
Staphylococcus_#_aureus_!_subsp._{_aureus_}_MRSA131_genomic_scaffold_Scfld118_whole_genome_shotgun_sequence|gi|422745902|ref|NZ_GL638178.1|	1.58	98.42	300	18690	18990
Staphylococcus_#_aureus_!_subsp._{_aureus_}_MRSA177_genomic_scaffold_Scfld182_whole_genome_shotgun_sequence|gi|422743723|ref|NZ_GL638225.1|	3.99	96.01	300	7218	7518
Staphylococcus_#_aureus_!_subsp._{_aureus_}_MRSA177_genomic_scaffold_Scfld278_whole_genome_shotgun_sequence|gi|422744029|ref|NZ_GL638231.1|	5.215	94.785	300	5453	5753
Staphylococcus_#_aureus_!_subsp._{_aureus_}_TCH130_genomic_scaffold_SCAFFOLD10_whole_genome_shotgun_sequence|gi|255925772|ref|NZ_GG698167.1|	1.066	98.934	300	27854	28154
Staphylococcus_#_aureus_!_subsp._{_aureus_}_USA300_FPR3757_plasmid_pUSA03_complete_sequence|gi|87159847|ref|NC_007792.1|	0.808	99.192	300	36836	37136
Staphylococcus_#_aureus_!_subsp._{_aureus_}_WW2703/97_genomic_scaffold_supercont1.10_whole_genome_shotgun_sequence|gi|282907893|ref|NZ_GG730229.1|	0.352	99.648	300	84926	85226
Staphylococcus_#_aureus_!_subsp._{_aureus_}_WW2703/97_genomic_scaffold_supercont1.11_whole_genome_shotgun_sequence|gi|282907983|ref|NZ_GG730230.1|	2.198	97.802	300	13348	13648
Staphylococcus_#_epidermidis_!_BCM-HMP0060_{_genomic_}_scaffold_SCAFFOLD2_whole_genome_shotgun_sequence|gi|254281371|ref|NZ_GG696728.1|	0.022	99.978	300	1338686	1338986
Staphylococcus_#_epidermidis_!_BVS058A4_{_genomic_}_scaffold_supercont1.3_whole_genome_shotgun_sequence|gi|448879116|ref|NZ_KB373337.1|	0.158	99.842	300	189632	189932
Staphylococcus_#_epidermidis_!_BVS058A4_{_genomic_}_scaffold_supercont1.4_whole_genome_shotgun_sequence|gi|448879117|ref|NZ_KB373338.1|	0.308	99.692	300	97174	97474
Staphylococcus_#_epidermidis_!_M23864:W2(grey)_{_genomic_}_scaffold_SCAFFOLD2_whole_genome_shotgun_sequence|gi|293368504|ref|NZ_GG749256.1|	0.053	99.947	300	561144	561444
Staphylococcus_#_epidermidis_!_Scl25_{_genomic_}_scaffold_Scl25_scaffold130_whole_genome_shotgun_sequence|gi|520978689|ref|NZ_KE367458.1|	4.808	95.192	300	5940	6240
Staphylococcus_#_epidermidis_!_Scl31_{_genomic_}_scaffold_Scl31_scaffold414_whole_genome_shotgun_sequence|gi|520980007|ref|NZ_KE368152.1|	3.912	96.088	300	7368	7668
Staphylococcus_#_epidermidis_!_plasmid_{_SAP016A_}_complete_sequence|gi|260871249|ref|NC_013372.1|	0.685	99.315	300	43507	43807
Staphylococcus_#_epidermidis_!_plasmid_{_SAP105A_}_complete_sequence|gi|260874698|ref|NC_013377.1|	1.143	98.857	300	25936	26236
Staphylococcus_#_hominis_!_subsp._{_hominis_}_C80_genomic_scaffold_supercont1.3_whole_genome_shotgun_sequence|gi|314935124|ref|NZ_GL545254.1|	0.094	99.906	300	317939	318239
Staphylococcus_#_saprophyticus_!_subsp._{_saprophyticus_}_ATCC_15305_plasmid_pSSP1_complete_sequence|gi|73663756|ref|NC_007351.1|	0.78	99.22	300	38154	38454
Staphylococcus_#_saprophyticus_!_subsp._{_saprophyticus_}_ATCC_15305_plasmid_pSSP2_complete_sequence|gi|73663802|ref|NC_007352.1|	1.312	98.688	300	22570	22870
Staphylococcus_#_simulans_!_ACS-120-V-Sch1_{_genomic_}_scaffold_supercont1.5_whole_genome_shotgun_sequence|gi|448879141|ref|NZ_KB373330.1|	0.307	99.693	300	97415	97715
Staphylococcus_#_sp._!_CDC25_{_plasmid_}_SAP018A_complete_sequence|gi|260894451|ref|NC_013387.1|	0.923	99.077	300	32187	32487
Staphylococcus_#_aureus_!_M1083_{_genomic_}_scaffold_acumj-supercont1.3_whole_genome_shotgun_sequence|gi|487394817|ref|NZ_KB821969.1|	0.04	99.96	275	681658	681933
Staphylococcus_#_aureus_!_M0104_{_genomic_}_scaffold_acrHp-supercont1.6_whole_genome_shotgun_sequence|gi|487372568|ref|NZ_KB821029.1|	0.757	99.243	274	35905	36179
Staphylococcus_#_epidermidis_!_APO27_{_genomic_}_scaffold_APO27_scaffold28_whole_genome_shotgun_sequence|gi|520964271|ref|NZ_KE365410.1|	8.644	91.356	255	2695	2950
Staphylococcus_#_epidermidis_!_CIM40_{_genomic_}_scaffold_CIM40_scaffold11_whole_genome_shotgun_sequence|gi|520973315|ref|NZ_KE365956.1|	8.615	91.385	255	2705	2960
Staphylococcus_#_epidermidis_!_MC16_{_genomic_}_scaffold_MC16_scaffold26_whole_genome_shotgun_sequence|gi|520975580|ref|NZ_KE370096.1|	8.621	91.379	255	2703	2958
Staphylococcus_#_epidermidis_!_MC19_{_genomic_}_scaffold_MC19_scaffold71_whole_genome_shotgun_sequence|gi|520976689|ref|NZ_KE370741.1|	8.147	91.853	255	2875	3130
Staphylococcus_#_epidermidis_!_MC28_{_genomic_}_scaffold_MC28_scaffold16_whole_genome_shotgun_sequence|gi|520976849|ref|NZ_KE366349.1|	8.621	91.379	255	2703	2958
Staphylococcus_#_epidermidis_!_Scl22_{_genomic_}_scaffold_Scl22_scaffold65_whole_genome_shotgun_sequence|gi|520978534|ref|NZ_KE367385.1|	9.518	90.482	255	2424	2679
Staphylococcus_#_epidermidis_!_Scl25_{_genomic_}_scaffold_Scl25_scaffold18_whole_genome_shotgun_sequence|gi|520978799|ref|NZ_KE367512.1|	15.898	84.102	255	1349	1604
Staphylococcus_#_epidermidis_!_Sentile1_{_genomic_}_scaffold_Sentile1_scaffold42_whole_genome_shotgun_sequence|gi|520980978|ref|NZ_KE368725.1|	8.592	91.408	255	2713	2968
Staphylococcus_#_epidermidis_!_Sentile2_{_genomic_}_scaffold_Sentile2_scaffold53_whole_genome_shotgun_sequence|gi|520981676|ref|NZ_KE369141.1|	8.621	91.379	255	2703	2958
Staphylococcus_#_epidermidis_!_WI05_{_genomic_}_scaffold_WI05_scaffold2_whole_genome_shotgun_sequence|gi|520981945|ref|NZ_KE369303.1|	8.621	91.379	255	2703	2958
Staphylococcus_#_epidermidis_!_WI09_{_genomic_}_scaffold_WI09_scaffold55_whole_genome_shotgun_sequence|gi|520982827|ref|NZ_KE369869.1|	8.571	91.429	255	2720	2975
Staphylococcus_#_aureus_!_subsp._{_aureus_}_TCH130_genomic_scaffold_SCAFFOLD14_whole_genome_shotgun_sequence|gi|255925776|ref|NZ_GG698171.1|	1.209	98.791	250	20420	20670
Staphylococcus_#_aureus_!_M0001_{_genomic_}_scaffold_acrHn-supercont1.4_whole_genome_shotgun_sequence|gi|486222830|ref|NZ_KB820946.1|	8.155	91.845	210	2365	2575
Staphylococcus_#_aureus_!_M0334_{_genomic_}_scaffold_acumz-supercont1.2_whole_genome_shotgun_sequence|gi|487363497|ref|NZ_KB821235.1|	1.514	98.486	210	13663	13873
Staphylococcus_#_aureus_!_M0350_{_genomic_}_scaffold_acunH-supercont1.4_whole_genome_shotgun_sequence|gi|487364130|ref|NZ_KB821253.1|	0.094	99.906	210	223371	223581
Staphylococcus_#_aureus_!_M0075_{_genomic_}_scaffold_acunI-supercont1.1_whole_genome_shotgun_sequence|gi|487399773|ref|NZ_KB822347.1|	0.019	99.981	201	1063620	1063821
Staphylococcus_#_aureus_!_M0240_{_genomic_}_scaffold_acqwO-supercont1.7_whole_genome_shotgun_sequence|gi|487374535|ref|NZ_KB821151.1|	0.034	99.966	201	590499	590700
Staphylococcus_#_aureus_!_M0326_{_genomic_}_scaffold_acrHf-supercont1.3_whole_genome_shotgun_sequence|gi|486268594|ref|NZ_KB821204.1|	0.068	99.932	201	293840	294041
Staphylococcus_#_aureus_!_M0467_{_genomic_}_scaffold_acqwA-supercont1.2_whole_genome_shotgun_sequence|gi|486305522|ref|NZ_KB821371.1|	0.019	99.981	201	1060789	1060990
Staphylococcus_#_aureus_!_M0687_{_genomic_}_scaffold_acvqC-supercont1.2_whole_genome_shotgun_sequence|gi|486365630|ref|NZ_KB821578.1|	0.12	99.88	201	166692	166893
Staphylococcus_#_aureus_!_M0769_{_genomic_}_scaffold_acvqF-supercont1.3_whole_genome_shotgun_sequence|gi|480447467|ref|NZ_KB821631.1|	0.025	99.975	201	805204	805405
Staphylococcus_#_aureus_!_M0822_{_genomic_}_scaffold_acunB-supercont1.3_whole_genome_shotgun_sequence|gi|487383638|ref|NZ_KB821682.1|	0.025	99.975	201	805605	805806
Staphylococcus_#_aureus_!_M1016_{_genomic_}_scaffold_acvqx-supercont1.3_whole_genome_shotgun_sequence|gi|486406130|ref|NZ_KB821844.1|	0.025	99.975	201	808474	808675
Staphylococcus_#_aureus_!_M1126_{_genomic_}_scaffold_acumd-supercont1.5_whole_genome_shotgun_sequence|gi|487395941|ref|NZ_KB822002.1|	0.032	99.968	201	632531	632732
Staphylococcus_#_aureus_!_M1229_{_genomic_}_scaffold_acunX-supercont1.1_whole_genome_shotgun_sequence|gi|486622114|ref|NZ_KB822108.1|	0.019	99.981	201	1034572	1034773
Staphylococcus_#_aureus_!_M1544_{_genomic_}_scaffold_acunm-supercont1.8_whole_genome_shotgun_sequence|gi|487139294|ref|NZ_KB822283.1|	0.124	99.876	201	161526	161727
Staphylococcus_#_aureus_!_M1556_{_genomic_}_scaffold_acund-supercont1.2_whole_genome_shotgun_sequence|gi|487139644|ref|NZ_KB822293.1|	0.028	99.972	201	729880	730081
Staphylococcus_#_aureus_!_M1556_{_genomic_}_scaffold_acund-supercont1.3_whole_genome_shotgun_sequence|gi|487139723|ref|NZ_KB822294.1|	0.059	99.941	201	338642	338843
Staphylococcus_#_aureus_!_subsp._{_aureus_}_CM05_genomic_scaffold_Scfld155_whole_genome_shotgun_sequence|gi|424773131|ref|NZ_JH806534.1|	0.447	99.553	201	44740	44941
Staphylococcus_#_aureus_!_subsp._{_aureus_}_D139_genomic_scaffold_supercont1.24_whole_genome_shotgun_sequence|gi|282917649|ref|NZ_GG730182.1|	0.292	99.708	201	68695	68896
Staphylococcus_#_aureus_!_subsp._{_aureus_}_D139_genomic_scaffold_supercont1.4_whole_genome_shotgun_sequence|gi|282915602|ref|NZ_GG730162.1|	0.208	99.792	201	96253	96454
Staphylococcus_#_aureus_!_subsp._{_aureus_}_D139_genomic_scaffold_supercont1.7_whole_genome_shotgun_sequence|gi|282915797|ref|NZ_GG730165.1|	0.517	99.483	201	38658	38859
Staphylococcus_#_aureus_!_subsp._{_aureus_}_H19_genomic_scaffold_supercont1.4_whole_genome_shotgun_sequence|gi|283768915|ref|NZ_GG730338.1|	0.517	99.483	201	38658	38859
Allofustis_#_seminis_!_DSM_{_15817_}_C231DRAFT_scaffold00012.12_whole_genome_shotgun_sequence|gi|483999899|ref|NZ_KB894090.1|	3.975	96.025	200	4831	5031
Bacillus_#_cereus_!_B5-2_{_genomic_}_scaffold_acqwr-supercont1.2_whole_genome_shotgun_sequence|gi|507066179|ref|NZ_KB976965.1|	0.385	99.615	200	51710	51910
Bacillus_#_cereus_!_B5-2_{_genomic_}_scaffold_acqwr-supercont1.3_whole_genome_shotgun_sequence|gi|507066201|ref|NZ_KB976972.1|	0.317	99.683	200	62851	63051
Bacillus_#_cereus_!_BAG1O-1_{_genomic_}_scaffold_acrHm-supercont1.13_whole_genome_shotgun_sequence|gi|506987763|ref|NZ_KB976291.1|	0.034	99.966	200	582130	582330
Bacillus_#_cereus_!_BAG1O-1_{_genomic_}_scaffold_acrHm-supercont1.1_whole_genome_shotgun_sequence|gi|506987569|ref|NZ_KB976287.1|	0.272	99.728	200	73340	73540
Bacillus_#_cereus_!_BAG1O-1_{_genomic_}_scaffold_acrHm-supercont1.6_whole_genome_shotgun_sequence|gi|506987781|ref|NZ_KB976296.1|	0.046	99.954	200	433950	434150
Bacillus_#_cereus_!_BAG1O-3_{_genomic_}_scaffold_supercont1.2_whole_genome_shotgun_sequence|gi|514961978|ref|NZ_KE332537.1|	0.03	99.97	200	662835	663035
Bacillus_#_cereus_!_BAG1O-3_{_genomic_}_scaffold_supercont1.7_whole_genome_shotgun_sequence|gi|514961983|ref|NZ_KE332542.1|	0.177	99.823	200	113086	113286
Bacillus_#_cereus_!_BAG1X1-1_{_genomic_}_scaffold_acfXz-supercont1.1_whole_genome_shotgun_sequence|gi|506992209|ref|NZ_KB976160.1|	0.004	99.996	200	4659362	4659562
Bacillus_#_cereus_!_BAG1X2-3_{_genomic_}_scaffold_acrGT-supercont1.11_whole_genome_shotgun_sequence|gi|506997465|ref|NZ_KB976237.1|	0.004	99.996	200	4611269	4611469
Bacillus_#_cereus_!_BAG1X2-3_{_genomic_}_scaffold_acrGT-supercont1.3_whole_genome_shotgun_sequence|gi|506999242|ref|NZ_KB976247.1|	0.071	99.929	200	282455	282655
Bacillus_#_cereus_!_BAG5X12-1_{_genomic_}_scaffold_acfXH-supercont1.4_whole_genome_shotgun_sequence|gi|507017991|ref|NZ_KB976556.1|	0.089	99.911	200	223275	223475
Bacillus_#_cereus_!_BMG1.7_{_genomic_}_scaffold_acqVx-supercont1.15_whole_genome_shotgun_sequence|gi|507018143|ref|NZ_KB976566.1|	0.207	99.793	200	96418	96618
Bacillus_#_cereus_!_HuA2-3_{_genomic_}_scaffold_acrHg-supercont1.1_whole_genome_shotgun_sequence|gi|507018597|ref|NZ_KB976661.1|	0.032	99.968	200	631020	631220
Bacillus_#_cereus_!_HuA2-9_{_genomic_}_scaffold_acqVt-supercont1.2_whole_genome_shotgun_sequence|gi|507021360|ref|NZ_KB976153.1|	0.009	99.991	200	2159302	2159502
Bacillus_#_cereus_!_HuA3-9_{_genomic_}_scaffold_acqVv-supercont1.12_whole_genome_shotgun_sequence|gi|507023042|ref|NZ_KB976128.1|	0.197	99.803	200	101381	101581
Bacillus_#_cereus_!_HuA3-9_{_genomic_}_scaffold_acqVv-supercont1.14_whole_genome_shotgun_sequence|gi|507023105|ref|NZ_KB976130.1|	0.322	99.678	200	61836	62036
Bacillus_#_cereus_!_HuA3-9_{_genomic_}_scaffold_acqVv-supercont1.15_whole_genome_shotgun_sequence|gi|507023118|ref|NZ_KB976131.1|	0.378	99.622	200	52656	52856
Bacillus_#_cereus_!_HuA3-9_{_genomic_}_scaffold_acqVv-supercont1.17_whole_genome_shotgun_sequence|gi|507023156|ref|NZ_KB976133.1|	1.015	98.985	200	19506	19706
Bacillus_#_cereus_!_HuA3-9_{_genomic_}_scaffold_acqVv-supercont1.18_whole_genome_shotgun_sequence|gi|507023161|ref|NZ_KB976134.1|	1.021	98.979	200	19391	19591
Bacillus_#_cereus_!_HuA3-9_{_genomic_}_scaffold_acqVv-supercont1.23_whole_genome_shotgun_sequence|gi|507023806|ref|NZ_KB976140.1|	2.731	97.269	200	7124	7324
Bacillus_#_cereus_!_HuA3-9_{_genomic_}_scaffold_acqVv-supercont1.5_whole_genome_shotgun_sequence|gi|507024566|ref|NZ_KB976147.1|	0.034	99.966	200	586222	586422
Bacillus_#_cereus_!_HuA3-9_{_genomic_}_scaffold_acqVv-supercont1.7_whole_genome_shotgun_sequence|gi|507024975|ref|NZ_KB976149.1|	0.086	99.914	200	233154	233354
Bacillus_#_cereus_!_HuA4-10_{_genomic_}_scaffold_supercont1.4_whole_genome_shotgun_sequence|gi|423526068|ref|NZ_JH792151.1|	0.09	99.91	200	222935	223135
Bacillus_#_cereus_!_HuA4-10_{_genomic_}_scaffold_supercont1.6_whole_genome_shotgun_sequence|gi|423526347|ref|NZ_JH792153.1|	0.327	99.673	200	60885	61085
Bacillus_#_cereus_!_MC67_{_genomic_}_scaffold_supercont1.2_whole_genome_shotgun_sequence|gi|423557538|ref|NZ_JH792114.1|	0.009	99.991	200	2309971	2310171
Bacillus_#_cereus_!_TIAC219_{_genomic_}_scaffold_actab-supercont2.31_whole_genome_shotgun_sequence|gi|505484174|ref|NZ_KB976032.1|	2.772	97.228	200	7014	7214
Bacillus_#_cereus_!_TIAC219_{_genomic_}_scaffold_actab-supercont2.8_whole_genome_shotgun_sequence|gi|505484250|ref|NZ_KB976043.1|	0.092	99.908	200	216232	216432
Bacillus_#_cereus_!_VD014_{_genomic_}_scaffold_supercont1.1_whole_genome_shotgun_sequence|gi|423578485|ref|NZ_JH792025.1|	0.004	99.996	200	5255621	5255821
Bacillus_#_cereus_!_VD021_{_genomic_}_scaffold_acqVy-supercont1.13_whole_genome_shotgun_sequence|gi|507029702|ref|NZ_KB976277.1|	0.734	99.266	200	27038	27238
Bacillus_#_cereus_!_VD021_{_genomic_}_scaffold_acqVy-supercont1.4_whole_genome_shotgun_sequence|gi|507030643|ref|NZ_KB976281.1|	0.03	99.97	200	658227	658427
Bacillus_#_cereus_!_VD021_{_genomic_}_scaffold_acqVy-supercont1.9_whole_genome_shotgun_sequence|gi|507031587|ref|NZ_KB976286.1|	0.21	99.79	200	94915	95115
Bacillus_#_cereus_!_VD048_{_genomic_}_scaffold_supercont1.1_whole_genome_shotgun_sequence|gi|423591132|ref|NZ_JH792310.1|	0.005	99.995	200	4064264	4064464
Bacillus_#_cereus_!_VD048_{_genomic_}_scaffold_supercont1.2_whole_genome_shotgun_sequence|gi|423595279|ref|NZ_JH792311.1|	0.031	99.969	200	641167	641367
Bacillus_#_cereus_!_VD048_{_genomic_}_scaffold_supercont1.8_whole_genome_shotgun_sequence|gi|423596967|ref|NZ_JH792317.1|	0.317	99.683	200	62812	63012
Bacillus_#_cereus_!_VD107_{_genomic_}_scaffold_supercont1.1_whole_genome_shotgun_sequence|gi|423609285|ref|NZ_JH792232.1|	0.005	99.995	200	3667786	3667986
Bacillus_#_cereus_!_VD107_{_genomic_}_scaffold_supercont1.2_whole_genome_shotgun_sequence|gi|423613053|ref|NZ_JH792233.1|	0.03	99.97	200	671830	672030
Bacillus_#_cereus_!_VD115_{_genomic_}_scaffold_supercont1.4_whole_genome_shotgun_sequence|gi|423619848|ref|NZ_JH792168.1|	0.042	99.958	200	474691	474891
Bacillus_#_cereus_!_VD115_{_genomic_}_scaffold_supercont1.5_whole_genome_shotgun_sequence|gi|423620333|ref|NZ_JH792169.1|	0.073	99.927	200	275152	275352
Bacillus_#_cereus_!_VD115_{_genomic_}_scaffold_supercont1.6_whole_genome_shotgun_sequence|gi|423620638|ref|NZ_JH792170.1|	0.09	99.91	200	221835	222035
Bacillus_#_cereus_!_VD118_{_genomic_}_scaffold_acrHo-supercont1.1_whole_genome_shotgun_sequence|gi|507031628|ref|NZ_KB976791.1|	0.175	99.825	200	114338	114538
Bacillus_#_cereus_!_VD118_{_genomic_}_scaffold_acrHo-supercont1.2_whole_genome_shotgun_sequence|gi|507031872|ref|NZ_KB976793.1|	0.039	99.961	200	509965	510165
Bacillus_#_cereus_!_VD118_{_genomic_}_scaffold_acrHo-supercont1.9_whole_genome_shotgun_sequence|gi|507035131|ref|NZ_KB976800.1|	0.01	99.99	200	1999324	1999524
Bacillus_#_cereus_!_VD131_{_genomic_}_scaffold_acrHi-supercont1.12_whole_genome_shotgun_sequence|gi|507035653|ref|NZ_KB976650.1|	0.034	99.966	200	586859	587059
Bacillus_#_cereus_!_VD131_{_genomic_}_scaffold_acrHi-supercont1.1_whole_genome_shotgun_sequence|gi|507035141|ref|NZ_KB976647.1|	0.359	99.641	200	55435	55635
Bacillus_#_cereus_!_VD133_{_genomic_}_scaffold_acqTw-supercont1.2_whole_genome_shotgun_sequence|gi|507039406|ref|NZ_KB976184.1|	0.018	99.982	200	1128434	1128634
Bacillus_#_cereus_!_VD133_{_genomic_}_scaffold_acqTw-supercont1.8_whole_genome_shotgun_sequence|gi|507040510|ref|NZ_KB976194.1|	0.091	99.909	200	218432	218632
Bacillus_#_cereus_!_VD136_{_genomic_}_scaffold_acrHc-supercont1.11_whole_genome_shotgun_sequence|gi|507041510|ref|NZ_KB976719.1|	0.102	99.898	200	195136	195336
Bacillus_#_cereus_!_VD136_{_genomic_}_scaffold_acrHc-supercont1.5_whole_genome_shotgun_sequence|gi|507045995|ref|NZ_KB976735.1|	0.253	99.747	200	78729	78929
Bacillus_#_cereus_!_VD142_{_genomic_}_scaffold_actaa-supercont2.4_whole_genome_shotgun_sequence|gi|514341272|ref|NZ_KE150047.1|	0.033	99.967	200	597213	597413
Bacillus_#_cereus_!_VD146_{_genomic_}_scaffold_acrHl-supercont1.9_whole_genome_shotgun_sequence|gi|507050474|ref|NZ_KB976692.1|	4.605	95.395	200	4143	4343
Bacillus_#_cereus_!_VD148_{_genomic_}_scaffold_supercont1.1_whole_genome_shotgun_sequence|gi|423621402|ref|NZ_JH792156.1|	0.004	99.996	200	4649679	4649879
Bacillus_#_cereus_!_VD154_{_genomic_}_scaffold_supercont1.2_whole_genome_shotgun_sequence|gi|423629043|ref|NZ_JH791881.1|	0.013	99.987	200	1513261	1513461
Bacillus_#_cereus_!_VD154_{_genomic_}_scaffold_supercont1.3_whole_genome_shotgun_sequence|gi|423630605|ref|NZ_JH791882.1|	0.015	99.985	200	1293999	1294199
Bacillus_#_cereus_!_VD154_{_genomic_}_scaffold_supercont1.4_whole_genome_shotgun_sequence|gi|423631987|ref|NZ_JH791883.1|	0.038	99.962	200	520759	520959
Bacillus_#_cereus_!_VD154_{_genomic_}_scaffold_supercont1.5_whole_genome_shotgun_sequence|gi|423632481|ref|NZ_JH791884.1|	0.048	99.952	200	413587	413787
Bacillus_#_cereus_!_VD156_{_genomic_}_scaffold_supercont1.2_whole_genome_shotgun_sequence|gi|423638081|ref|NZ_JH791866.1|	0.02	99.98	200	1009528	1009728
Bacillus_#_cereus_!_VD166_{_genomic_}_scaffold_supercont1.2_whole_genome_shotgun_sequence|gi|423644087|ref|NZ_JH791855.1|	0.03	99.97	200	664193	664393
Bacillus_#_cereus_!_VD166_{_genomic_}_scaffold_supercont1.3_whole_genome_shotgun_sequence|gi|423644715|ref|NZ_JH791856.1|	0.047	99.953	200	423305	423505
Bacillus_#_cereus_!_VD196_{_genomic_}_scaffold_acqVw-supercont1.2_whole_genome_shotgun_sequence|gi|507054687|ref|NZ_KB976265.1|	0.023	99.977	200	882829	883029
Bacillus_#_cereus_!_VDM006_{_genomic_}_scaffold_acrHb-supercont1.12_whole_genome_shotgun_sequence|gi|507060297|ref|NZ_KB976867.1|	0.102	99.898	200	195608	195808
Bacillus_#_cereus_!_VDM006_{_genomic_}_scaffold_acrHb-supercont1.2_whole_genome_shotgun_sequence|gi|507060723|ref|NZ_KB976875.1|	0.376	99.624	200	53058	53258
Bacillus_#_cereus_!_VDM006_{_genomic_}_scaffold_acrHb-supercont1.4_whole_genome_shotgun_sequence|gi|507061374|ref|NZ_KB976897.1|	0.254	99.746	200	78605	78805
Bacillus_#_cereus_!_VDM006_{_genomic_}_scaffold_acrHb-supercont1.6_whole_genome_shotgun_sequence|gi|507061387|ref|NZ_KB976901.1|	3.573	96.427	200	5398	5598
Bacillus_#_cereus_!_VDM006_{_genomic_}_scaffold_acrHb-supercont1.7_whole_genome_shotgun_sequence|gi|507061389|ref|NZ_KB976902.1|	3.201	96.799	200	6048	6248
Bacillus_#_cereus_!_VDM006_{_genomic_}_scaffold_acrHb-supercont1.8_whole_genome_shotgun_sequence|gi|507061397|ref|NZ_KB976903.1|	1.654	98.346	200	11892	12092
Bacillus_#_cereus_!_VDM006_{_genomic_}_scaffold_acrHb-supercont1.9_whole_genome_shotgun_sequence|gi|507061520|ref|NZ_KB976904.1|	0.081	99.919	200	247568	247768
Bacillus_#_cereus_!_VDM021_{_genomic_}_scaffold_acrHe-supercont1.1_whole_genome_shotgun_sequence|gi|507061629|ref|NZ_KB976905.1|	0.034	99.966	200	596805	597005
Bacillus_#_cereus_!_VDM053_{_genomic_}_scaffold_acrGS-supercont1.2_whole_genome_shotgun_sequence|gi|507057388|ref|NZ_KB976709.1|	0.057	99.943	200	349080	349280
Bacillus_#_cereus_!_VDM062_{_genomic_}_scaffold_supercont1.2_whole_genome_shotgun_sequence|gi|423677436|ref|NZ_JH791803.1|	0.046	99.954	200	432114	432314
Bacillus_#_cereus_!_str._{_Schrouff_}_genomic_scaffold_acsZZ-supercont2.11_whole_genome_shotgun_sequence|gi|506986687|ref|NZ_KB976109.1|	1.04	98.96	200	19029	19229
Bacillus_#_cereus_!_str._{_Schrouff_}_genomic_scaffold_acsZZ-supercont2.4_whole_genome_shotgun_sequence|gi|506987193|ref|NZ_KB976119.1|	0.092	99.908	200	216308	216508
Bacillus_#_massiliosenegalensis_!_JC6_{_whole_}_genome_shotgun_sequence|gi|484030257|ref|NZ_HE978527.1|	4.245	95.755	200	4511	4711
Bacillus_#_mojavensis_!_RO-H-1_{_genomic_}_scaffold_gbs2c.contig.1_whole_genome_shotgun_sequence|gi|397738182|ref|NZ_JH600278.1|	0.303	99.697	200	65731	65931
Bacillus_#_mojavensis_!_RO-H-1_{_genomic_}_scaffold_gbs2c.contig.3_whole_genome_shotgun_sequence|gi|397738184|ref|NZ_JH600280.1|	0.075	99.925	200	266920	267120
Bacillus_#_mojavensis_!_RO-H-1_{_genomic_}_scaffold_gbs2c.contig.4_whole_genome_shotgun_sequence|gi|397738185|ref|NZ_JH600281.1|	0.987	99.013	200	20073	20273
Bacillus_#_mojavensis_!_RO-H-1_{_genomic_}_scaffold_gbs2c.contig.5_whole_genome_shotgun_sequence|gi|397738186|ref|NZ_JH600282.1|	3.888	96.112	200	4944	5144
Bacillus_#_mojavensis_!_RO-H-1_{_genomic_}_scaffold_gbs2c.contig.7_whole_genome_shotgun_sequence|gi|397738188|ref|NZ_JH600284.1|	0.033	99.967	200	597147	597347
Bacillus_#_mojavensis_!_RO-H-1_{_genomic_}_scaffold_gbs2c.contig.8_whole_genome_shotgun_sequence|gi|397738189|ref|NZ_JH600285.1|	0.11	99.89	200	181847	182047
Bacillus_#_pumilus_!_S-1_{_scaffold1_}_whole_genome_shotgun_sequence|gi|485473425|ref|NZ_JH137647.1|	6.564	93.436	200	2847	3047
Bacillus_#_sp._!_NRRL_{_B-14911_}_scf_1099999053203_genomic_scaffold_whole_genome_shotgun_sequence|gi|211593981|ref|NZ_CH672363.1|	0.096	99.904	200	208449	208649
Bacillus_#_sp._!_NRRL_{_B-14911_}_scf_1099999053204_genomic_scaffold_whole_genome_shotgun_sequence|gi|211593980|ref|NZ_CH672362.1|	0.096	99.904	200	208959	209159
Bacillus_#_vallismortis_!_DV1-F-3_{_genomic_}_scaffold_scf7180000000874_whole_genome_shotgun_sequence|gi|397738310|ref|NZ_JH600202.1|	0.817	99.183	200	24277	24477
Bacillus_#_vallismortis_!_DV1-F-3_{_genomic_}_scaffold_scf7180000000918_whole_genome_shotgun_sequence|gi|397738351|ref|NZ_JH600243.1|	0.066	99.934	200	300828	301028
Bacillus_#_vallismortis_!_DV1-F-3_{_genomic_}_scaffold_scf7180000000921_whole_genome_shotgun_sequence|gi|397738354|ref|NZ_JH600246.1|	0.334	99.666	200	59644	59844
Bacillus_#_vallismortis_!_DV1-F-3_{_genomic_}_scaffold_scf7180000000924_whole_genome_shotgun_sequence|gi|397738357|ref|NZ_JH600249.1|	0.938	99.062	200	21121	21321
Dolosigranulum_#_pigrum_!_ATCC_{_51524_}_genomic_scaffold_supercont1.1_whole_genome_shotgun_sequence|gi|375089281|ref|NZ_JH601103.1|	0.013	99.987	200	1523326	1523526
Enterococcus_#_faecalis_!_B1505_{_genomic_}_scaffold_acHXM-supercont1.4_whole_genome_shotgun_sequence|gi|500982315|ref|NZ_KB932432.1|	0.351	99.649	200	56769	56969
Facklamia_#_hominis_!_ACS-120-V-Sch10_{_genomic_}_scaffold_acBRj-supercont1.2_whole_genome_shotgun_sequence|gi|514960256|ref|NZ_KE340334.1|	0.021	99.979	200	971467	971667
Lactobacillus_#_murinus_!_ASF361_{_genomic_}_scaffold_acLZi-supercont1.3_whole_genome_shotgun_sequence|gi|490151422|ref|NZ_KB822406.1|	0.06	99.94	200	330631	330831
Lysinibacillus_#_sphaericus_!_OT4b.31_{_genomic_}_scaffold_Ls31_scaffold17_whole_genome_shotgun_sequence|gi|499133316|ref|NZ_KB933414.1|	6.633	93.367	200	2815	3015
Oenococcus_#_kitaharae_!_DSM_{_17330_}_chromosome_whole_genome_shotgun_sequence|gi|372325750|ref|NZ_CM001398.1|	0.011	99.989	200	1833725	1833925
Oenococcus_#_oeni_!_PSU-1_{_complete_}_genome|gi|116490126|ref|NC_008528.1|	0.011	99.989	200	1780317	1780517
Paenibacillus_#_sp._!_HGH0039_{_genomic_}_scaffold_aczJo-supercont1.1_whole_genome_shotgun_sequence|gi|512471420|ref|NZ_KE150412.1|	0.006	99.994	200	3272676	3272876
Paenisporosarcina_#_sp._!_HGH0030_{_genomic_}_scaffold_acAqH-supercont1.2_whole_genome_shotgun_sequence|gi|512487386|ref|NZ_KE150422.1|	0.038	99.962	200	523648	523848
Staphylococcus_#_aureus_!_B147830_{_genomic_}_scaffold_acqwB-supercont1.3_whole_genome_shotgun_sequence|gi|486331807|ref|NZ_KB822313.1|	0.464	99.536	200	42870	43070
Staphylococcus_#_aureus_!_M0001_{_genomic_}_scaffold_acrHn-supercont1.2_whole_genome_shotgun_sequence|gi|486220991|ref|NZ_KB820938.1|	0.017	99.983	200	1187927	1188127
Staphylococcus_#_aureus_!_M0066_{_genomic_}_scaffold_acqxs-supercont1.1_whole_genome_shotgun_sequence|gi|486236423|ref|NZ_KB820993.1|	0.018	99.982	200	1114491	1114691
Staphylococcus_#_aureus_!_M0103_{_genomic_}_scaffold_acqxd-supercont1.1_whole_genome_shotgun_sequence|gi|486242902|ref|NZ_KB821012.1|	0.018	99.982	200	1117963	1118163
Staphylococcus_#_aureus_!_M0104_{_genomic_}_scaffold_acrHp-supercont1.8_whole_genome_shotgun_sequence|gi|487372713|ref|NZ_KB821031.1|	0.058	99.942	200	345927	346127
Staphylococcus_#_aureus_!_M0154_{_genomic_}_scaffold_acumB-supercont1.10_whole_genome_shotgun_sequence|gi|487359424|ref|NZ_KB821044.1|	0.125	99.875	200	159781	159981
Staphylococcus_#_aureus_!_M0171_{_genomic_}_scaffold_acqwu-supercont1.1_whole_genome_shotgun_sequence|gi|487372817|ref|NZ_KB821061.1|	0.017	99.983	200	1163300	1163500
Staphylococcus_#_aureus_!_M0177_{_genomic_}_scaffold_acumi-supercont1.4_whole_genome_shotgun_sequence|gi|487360092|ref|NZ_KB821081.1|	0.109	99.891	200	182866	183066
Staphylococcus_#_aureus_!_M0177_{_genomic_}_scaffold_acumi-supercont1.5_whole_genome_shotgun_sequence|gi|487360174|ref|NZ_KB821082.1|	0.019	99.981	200	1069576	1069776
Staphylococcus_#_aureus_!_M0197_{_genomic_}_scaffold_acrGV-supercont1.4_whole_genome_shotgun_sequence|gi|486257772|ref|NZ_KB821087.1|	0.044	99.956	200	458709	458909
Staphylococcus_#_aureus_!_M0200_{_genomic_}_scaffold_acumC-supercont1.10_whole_genome_shotgun_sequence|gi|487360308|ref|NZ_KB821093.1|	0.225	99.775	200	88514	88714
Staphylococcus_#_aureus_!_M0210_{_genomic_}_scaffold_acqwt-supercont1.3_whole_genome_shotgun_sequence|gi|487373377|ref|NZ_KB821107.1|	0.036	99.964	200	557553	557753
Staphylococcus_#_aureus_!_M0212_{_genomic_}_scaffold_acuna-supercont1.2_whole_genome_shotgun_sequence|gi|487360795|ref|NZ_KB821111.1|	0.041	99.959	200	490060	490260
Staphylococcus_#_aureus_!_M0237_{_genomic_}_scaffold_acrHd-supercont1.5_whole_genome_shotgun_sequence|gi|486261712|ref|NZ_KB821137.1|	0.118	99.882	200	168655	168855
Staphylococcus_#_aureus_!_M0240_{_genomic_}_scaffold_acqwO-supercont1.10_whole_genome_shotgun_sequence|gi|487374039|ref|NZ_KB821144.1|	0.179	99.821	200	111336	111536
Staphylococcus_#_aureus_!_M0270_{_genomic_}_scaffold_acrGX-supercont1.1_whole_genome_shotgun_sequence|gi|487374734|ref|NZ_KB821154.1|	0.018	99.982	200	1114090	1114290
Staphylococcus_#_aureus_!_M0280_{_genomic_}_scaffold_acunT-supercont1.4_whole_genome_shotgun_sequence|gi|487362493|ref|NZ_KB821184.1|	1.689	98.311	200	11644	11844
Staphylococcus_#_aureus_!_M0294_{_genomic_}_scaffold_acumG-supercont1.8_whole_genome_shotgun_sequence|gi|487400169|ref|NZ_KB822360.1|	0.067	99.933	200	298110	298310
Staphylococcus_#_aureus_!_M0326_{_genomic_}_scaffold_acrHf-supercont1.4_whole_genome_shotgun_sequence|gi|486268858|ref|NZ_KB821205.1|	0.215	99.785	200	92806	93006
Staphylococcus_#_aureus_!_M0351_{_genomic_}_scaffold_acunV-supercont1.3_whole_genome_shotgun_sequence|gi|487364343|ref|NZ_KB821257.1|	0.041	99.959	200	492249	492449
Staphylococcus_#_aureus_!_M0351_{_genomic_}_scaffold_acunV-supercont1.8_whole_genome_shotgun_sequence|gi|487364530|ref|NZ_KB821262.1|	0.022	99.978	200	908569	908769
Staphylococcus_#_aureus_!_M0364_{_genomic_}_scaffold_acqwM-supercont1.4_whole_genome_shotgun_sequence|gi|486287600|ref|NZ_KB821267.1|	0.08	99.92	200	250906	251106
Staphylococcus_#_aureus_!_M0364_{_genomic_}_scaffold_acqwM-supercont1.5_whole_genome_shotgun_sequence|gi|486287855|ref|NZ_KB821268.1|	0.118	99.882	200	169981	170181
Staphylococcus_#_aureus_!_M0375_{_genomic_}_scaffold_acunY-supercont1.1_whole_genome_shotgun_sequence|gi|487365727|ref|NZ_KB821282.1|	0.018	99.982	200	1123598	1123798
Staphylococcus_#_aureus_!_M0404_{_genomic_}_scaffold_acrGQ-supercont1.2_whole_genome_shotgun_sequence|gi|487378643|ref|NZ_KB821303.1|	0.122	99.878	200	163232	163432
Staphylococcus_#_aureus_!_M0408_{_genomic_}_scaffold_acrHk-supercont1.5_whole_genome_shotgun_sequence|gi|486296934|ref|NZ_KB821330.1|	0.737	99.263	200	26931	27131
Staphylococcus_#_aureus_!_M0408_{_genomic_}_scaffold_acrHk-supercont1.6_whole_genome_shotgun_sequence|gi|486297196|ref|NZ_KB821331.1|	0.251	99.749	200	79549	79749
Staphylococcus_#_aureus_!_M0467_{_genomic_}_scaffold_acqwA-supercont1.4_whole_genome_shotgun_sequence|gi|486306531|ref|NZ_KB821373.1|	0.174	99.826	200	114991	115191
Staphylococcus_#_aureus_!_M0529_{_genomic_}_scaffold_acumA-supercont1.5_whole_genome_shotgun_sequence|gi|486414710|ref|NZ_KB821435.1|	0.383	99.617	200	52063	52263
Staphylococcus_#_aureus_!_M0562_{_genomic_}_scaffold_acumS-supercont1.5_whole_genome_shotgun_sequence|gi|487370355|ref|NZ_KB821474.1|	0.031	99.969	200	637036	637236
Staphylococcus_#_aureus_!_M0584_{_genomic_}_scaffold_acunu-supercont1.1_whole_genome_shotgun_sequence|gi|487370833|ref|NZ_KB821489.1|	0.04	99.96	200	501096	501296
Staphylococcus_#_aureus_!_M0648_{_genomic_}_scaffold_acunl-supercont1.1_whole_genome_shotgun_sequence|gi|487380947|ref|NZ_KB821519.1|	0.02	99.98	200	1004302	1004502
Staphylococcus_#_aureus_!_M0660_{_genomic_}_scaffold_acumg-supercont1.1_whole_genome_shotgun_sequence|gi|487381360|ref|NZ_KB821531.1|	0.023	99.977	200	859703	859903
Staphylococcus_#_aureus_!_M0660_{_genomic_}_scaffold_acumg-supercont1.8_whole_genome_shotgun_sequence|gi|487381594|ref|NZ_KB821544.1|	3.511	96.489	200	5497	5697
Staphylococcus_#_aureus_!_M0663_{_genomic_}_scaffold_acuoc-supercont1.13_whole_genome_shotgun_sequence|gi|487381874|ref|NZ_KB821550.1|	0.03	99.97	200	676069	676269
Staphylococcus_#_aureus_!_M0673_{_genomic_}_scaffold_acumv-supercont1.7_whole_genome_shotgun_sequence|gi|487382633|ref|NZ_KB821568.1|	0.07	99.93	200	285363	285563
Staphylococcus_#_aureus_!_M0692_{_genomic_}_scaffold_acvqM-supercont1.1_whole_genome_shotgun_sequence|gi|486368254|ref|NZ_KB821586.1|	0.023	99.977	200	854858	855058
Staphylococcus_#_aureus_!_M0719_{_genomic_}_scaffold_acvrc-supercont1.1_whole_genome_shotgun_sequence|gi|480443880|ref|NZ_KB821615.1|	0.02	99.98	200	976029	976229
Staphylococcus_#_aureus_!_M0719_{_genomic_}_scaffold_acvrc-supercont1.7_whole_genome_shotgun_sequence|gi|480446482|ref|NZ_KB821622.1|	0.139	99.861	200	143325	143525
Staphylococcus_#_aureus_!_M0769_{_genomic_}_scaffold_acvqF-supercont1.10_whole_genome_shotgun_sequence|gi|480447094|ref|NZ_KB821626.1|	15.408	84.592	200	1098	1298
Staphylococcus_#_aureus_!_M0780_{_genomic_}_scaffold_acvqm-supercont1.4_whole_genome_shotgun_sequence|gi|486376336|ref|NZ_KB821665.1|	0.078	99.922	200	257624	257824
Staphylococcus_#_aureus_!_M0799_{_genomic_}_scaffold_acvqq-supercont1.1_whole_genome_shotgun_sequence|gi|486378646|ref|NZ_KB821650.1|	0.018	99.982	200	1081302	1081502
Staphylococcus_#_aureus_!_M0799_{_genomic_}_scaffold_acvqq-supercont1.8_whole_genome_shotgun_sequence|gi|486380496|ref|NZ_KB821660.1|	0.069	99.931	200	290616	290816
Staphylococcus_#_aureus_!_M0822_{_genomic_}_scaffold_acunB-supercont1.5_whole_genome_shotgun_sequence|gi|487383702|ref|NZ_KB821684.1|	0.949	99.051	200	20869	21069
Staphylococcus_#_aureus_!_M0871_{_genomic_}_scaffold_acumy-supercont1.5_whole_genome_shotgun_sequence|gi|487384661|ref|NZ_KB821705.1|	0.146	99.854	200	136706	136906
Staphylococcus_#_aureus_!_M0871_{_genomic_}_scaffold_acumy-supercont1.6_whole_genome_shotgun_sequence|gi|487384723|ref|NZ_KB821706.1|	0.026	99.974	200	784078	784278
Staphylococcus_#_aureus_!_M0877_{_genomic_}_scaffold_acumt-supercont1.1_whole_genome_shotgun_sequence|gi|487384875|ref|NZ_KB821714.1|	0.456	99.544	200	43658	43858
Staphylococcus_#_aureus_!_M0927_{_genomic_}_scaffold_aculU-supercont1.5_whole_genome_shotgun_sequence|gi|487387476|ref|NZ_KB821755.1|	0.086	99.914	200	232816	233016
Staphylococcus_#_aureus_!_M0944_{_genomic_}_scaffold_acvqy-supercont1.5_whole_genome_shotgun_sequence|gi|486395498|ref|NZ_KB821783.1|	0.03	99.97	200	676011	676211
Staphylococcus_#_aureus_!_M0964_{_genomic_}_scaffold_aculV-supercont1.2_whole_genome_shotgun_sequence|gi|487388415|ref|NZ_KB821802.1|	0.045	99.955	200	444279	444479
Staphylococcus_#_aureus_!_M1016_{_genomic_}_scaffold_acvqx-supercont1.4_whole_genome_shotgun_sequence|gi|486406319|ref|NZ_KB821845.1|	0.087	99.913	200	230842	231042
Staphylococcus_#_aureus_!_M1034_{_genomic_}_scaffold_acumn-supercont1.4_whole_genome_shotgun_sequence|gi|487391471|ref|NZ_KB821855.1|	0.257	99.743	200	77771	77971
Staphylococcus_#_aureus_!_M1037_{_genomic_}_scaffold_acvqz-supercont1.4_whole_genome_shotgun_sequence|gi|486410818|ref|NZ_KB821923.1|	0.077	99.923	200	258787	258987
Staphylococcus_#_aureus_!_M1044_{_genomic_}_scaffold_acumE-supercont1.2_whole_genome_shotgun_sequence|gi|487392452|ref|NZ_KB821882.1|	0.086	99.914	200	232596	232796
Staphylococcus_#_aureus_!_M1061_{_genomic_}_scaffold_aculN-supercont1.1_whole_genome_shotgun_sequence|gi|487393271|ref|NZ_KB821890.1|	0.018	99.982	200	1116915	1117115
Staphylococcus_#_aureus_!_M1068_{_genomic_}_scaffold_acunM-supercont1.1_whole_genome_shotgun_sequence|gi|487394365|ref|NZ_KB821927.1|	0.04	99.96	200	494683	494883
Staphylococcus_#_aureus_!_M1068_{_genomic_}_scaffold_acunM-supercont1.4_whole_genome_shotgun_sequence|gi|487394500|ref|NZ_KB821930.1|	0.076	99.924	200	261242	261442
Staphylococcus_#_aureus_!_M1078_{_genomic_}_scaffold_aculT-supercont1.3_whole_genome_shotgun_sequence|gi|487400812|ref|NZ_KB822364.1|	0.114	99.886	200	175770	175970
Staphylococcus_#_aureus_!_M1078_{_genomic_}_scaffold_aculT-supercont1.5_whole_genome_shotgun_sequence|gi|487400877|ref|NZ_KB822366.1|	0.016	99.984	200	1244016	1244216
Staphylococcus_#_aureus_!_M1083_{_genomic_}_scaffold_acumj-supercont1.5_whole_genome_shotgun_sequence|gi|487394864|ref|NZ_KB821971.1|	0.114	99.886	200	175830	176030
Staphylococcus_#_aureus_!_M1092_{_genomic_}_scaffold_acunK-supercont1.2_whole_genome_shotgun_sequence|gi|486422034|ref|NZ_KB821958.1|	0.455	99.545	200	43732	43932
Staphylococcus_#_aureus_!_M1095_{_genomic_}_scaffold_aculR-supercont1.1_whole_genome_shotgun_sequence|gi|486425264|ref|NZ_KB821976.1|	0.047	99.953	200	421500	421700
Staphylococcus_#_aureus_!_M1119_{_genomic_}_scaffold_acunS-supercont1.9_whole_genome_shotgun_sequence|gi|486431412|ref|NZ_KB822033.1|	0.238	99.762	200	83778	83978
Staphylococcus_#_aureus_!_M1126_{_genomic_}_scaffold_acumd-supercont1.12_whole_genome_shotgun_sequence|gi|487395827|ref|NZ_KB821994.1|	15.408	84.592	200	1098	1298
Staphylococcus_#_aureus_!_M1229_{_genomic_}_scaffold_acunX-supercont1.2_whole_genome_shotgun_sequence|gi|486624733|ref|NZ_KB822109.1|	0.118	99.882	200	169709	169909
Staphylococcus_#_aureus_!_M1244_{_genomic_}_scaffold_acumu-supercont1.11_whole_genome_shotgun_sequence|gi|487396942|ref|NZ_KB822088.1|	0.033	99.967	200	605907	606107
Staphylococcus_#_aureus_!_M1244_{_genomic_}_scaffold_acumu-supercont1.6_whole_genome_shotgun_sequence|gi|487397111|ref|NZ_KB822095.1|	4.004	95.996	200	4795	4995
Staphylococcus_#_aureus_!_M1248_{_genomic_}_scaffold_acunw-supercont1.4_whole_genome_shotgun_sequence|gi|486650021|ref|NZ_KB822102.1|	0.061	99.939	200	329695	329895
Staphylococcus_#_aureus_!_M1248_{_genomic_}_scaffold_acunw-supercont1.5_whole_genome_shotgun_sequence|gi|486651308|ref|NZ_KB822103.1|	0.154	99.846	200	129351	129551
Staphylococcus_#_aureus_!_M1255_{_genomic_}_scaffold_acunA-supercont1.1_whole_genome_shotgun_sequence|gi|486676271|ref|NZ_KB822116.1|	0.044	99.956	200	452720	452920
Staphylococcus_#_aureus_!_M1255_{_genomic_}_scaffold_acunA-supercont1.4_whole_genome_shotgun_sequence|gi|486687246|ref|NZ_KB822119.1|	0.087	99.913	200	231008	231208
Staphylococcus_#_aureus_!_M1255_{_genomic_}_scaffold_acunA-supercont1.7_whole_genome_shotgun_sequence|gi|486697825|ref|NZ_KB822122.1|	0.032	99.968	200	630947	631147
Staphylococcus_#_aureus_!_M1291_{_genomic_}_scaffold_acumW-supercont1.8_whole_genome_shotgun_sequence|gi|486812176|ref|NZ_KB822173.1|	9.046	90.954	200	2011	2211
Staphylococcus_#_aureus_!_M1309_{_genomic_}_scaffold_acunC-supercont1.5_whole_genome_shotgun_sequence|gi|487398450|ref|NZ_KB822160.1|	0.118	99.882	200	169465	169665
Staphylococcus_#_aureus_!_M1321_{_genomic_}_scaffold_acunh-supercont1.11_whole_genome_shotgun_sequence|gi|486895834|ref|NZ_KB822188.1|	0.032	99.968	200	630350	630550
Staphylococcus_#_aureus_!_M1321_{_genomic_}_scaffold_acunh-supercont1.2_whole_genome_shotgun_sequence|gi|486904299|ref|NZ_KB822192.1|	0.048	99.952	200	418731	418931
Staphylococcus_#_aureus_!_M1322_{_genomic_}_scaffold_acumT-supercont1.1_whole_genome_shotgun_sequence|gi|486939422|ref|NZ_KB822200.1|	0.089	99.911	200	225247	225447
Staphylococcus_#_aureus_!_M1374_{_genomic_}_scaffold_acumR-supercont1.9_whole_genome_shotgun_sequence|gi|487398752|ref|NZ_KB822227.1|	0.032	99.968	200	627513	627713
Staphylococcus_#_aureus_!_M1405_{_genomic_}_scaffold_acumh-supercont1.10_whole_genome_shotgun_sequence|gi|487398869|ref|NZ_KB822536.1|	15.408	84.592	200	1098	1298
Staphylococcus_#_aureus_!_M1510_{_genomic_}_scaffold_aculM-supercont1.1_whole_genome_shotgun_sequence|gi|487399328|ref|NZ_KB822257.1|	0.044	99.956	200	450317	450517
Staphylococcus_#_aureus_!_M1563_{_genomic_}_scaffold_acuoe-supercont1.2_whole_genome_shotgun_sequence|gi|487146809|ref|NZ_KB822305.1|	0.471	99.529	200	42276	42476
Staphylococcus_#_aureus_!_plasmid_{_J3358_}_complete_sequence|gi|10956144|ref|NC_001763.1|	3.32	96.68	200	5824	6024
Staphylococcus_#_aureus_!_plasmid_{_SAP017A_}_complete_sequence|gi|260666163|ref|NC_013321.1|	0.613	99.387	200	32450	32650
Staphylococcus_#_aureus_!_plasmid_{_SAP047A_}_complete_sequence|gi|260667553|ref|NC_013331.1|	0.69	99.31	200	28774	28974
Staphylococcus_#_aureus_!_plasmid_{_SAP064A_}_complete_sequence|gi|260667559|ref|NC_013337.1|	0.648	99.352	200	30657	30857
Staphylococcus_#_aureus_!_plasmid_{_pCM05_}_complete_sequence|gi|260666220|ref|NC_013323.1|	0.594	99.406	200	33460	33660
Staphylococcus_#_aureus_!_plasmid_{_pI258_}_complete_sequence|gi|260666110|ref|NC_013319.1|	0.684	99.316	200	29054	29254
Staphylococcus_#_aureus_!_plasmid_{_pLW043_}_complete_sequence|gi|33416233|ref|NC_005054.1|	0.345	99.655	200	57689	57889
Staphylococcus_#_aureus_!_plasmid_{_pPR9_}_complete_sequence|gi|281427745|ref|NC_013653.1|	0.479	99.521	200	41515	41715
Staphylococcus_#_aureus_!_plasmid_{_pSK62_}_complete_sequence|gi|260667569|ref|NC_013347.1|	0.881	99.119	200	22494	22694
Staphylococcus_#_aureus_!_plasmid_{_pSK76_}_complete_sequence|gi|260667574|ref|NC_013352.1|	0.834	99.166	200	23783	23983
Staphylococcus_#_aureus_!_plasmid_{_pV030-8_}_complete_sequence|gi|166153441|ref|NC_010279.1|	0.512	99.488	200	38841	39041
Staphylococcus_#_aureus_!_subsp._{_aureus_}_A017934/97_genomic_scaffold_supercont1.17_whole_genome_shotgun_sequence|gi|283958944|ref|NZ_GG731511.1|	0.361	99.639	200	55179	55379
Staphylococcus_#_aureus_!_subsp._{_aureus_}_ATCC_51811_genomic_scaffold_SCAFFOLD7_whole_genome_shotgun_sequence|gi|297210125|ref|NZ_GG774486.1|	9.443	90.557	200	1918	2118
Staphylococcus_#_aureus_!_subsp._{_aureus_}_C101_genomic_scaffold_supercont1.15_whole_genome_shotgun_sequence|gi|282925249|ref|NZ_GG730134.1|	1.443	98.557	200	13662	13862
Staphylococcus_#_aureus_!_subsp._{_aureus_}_C101_genomic_scaffold_supercont1.16_whole_genome_shotgun_sequence|gi|282925320|ref|NZ_GG730135.1|	0.313	99.687	200	63620	63820
Staphylococcus_#_aureus_!_subsp._{_aureus_}_CM05_genomic_scaffold_Scfld401_whole_genome_shotgun_sequence|gi|424774983|ref|NZ_JH806557.1|	0.118	99.882	200	169199	169399
Staphylococcus_#_aureus_!_subsp._{_aureus_}_CM05_genomic_scaffold_Scfld725_whole_genome_shotgun_sequence|gi|424777678|ref|NZ_JH806570.1|	0.118	99.882	200	168878	169078
Staphylococcus_#_aureus_!_subsp._{_aureus_}_CM05_genomic_scaffold_Scfld8_whole_genome_shotgun_sequence|gi|424767487|ref|NZ_JH806475.1|	2.932	97.068	200	6621	6821
Staphylococcus_#_aureus_!_subsp._{_aureus_}_D139_genomic_scaffold_supercont1.23_whole_genome_shotgun_sequence|gi|282917513|ref|NZ_GG730181.1|	0.167	99.833	200	119797	119997
Staphylococcus_#_aureus_!_subsp._{_aureus_}_EMRSA16_genomic_scaffold_supercont1.8_whole_genome_shotgun_sequence|gi|295427453|ref|NZ_GG770520.1|	0.681	99.319	200	29177	29377
Staphylococcus_#_aureus_!_subsp._{_aureus_}_M1015_genomic_scaffold_supercont1.14_whole_genome_shotgun_sequence|gi|293545390|ref|NZ_GG749009.1|	1.443	98.557	200	13661	13861
Staphylococcus_#_aureus_!_subsp._{_aureus_}_M1015_genomic_scaffold_supercont1.15_whole_genome_shotgun_sequence|gi|293545409|ref|NZ_GG749010.1|	0.318	99.682	200	62791	62991
Staphylococcus_#_aureus_!_subsp._{_aureus_}_M809_genomic_scaffold_supercont1.17_whole_genome_shotgun_sequence|gi|293510751|ref|NZ_GG749315.1|	0.535	99.465	200	37185	37385
Staphylococcus_#_aureus_!_subsp._{_aureus_}_M809_genomic_scaffold_supercont1.18_whole_genome_shotgun_sequence|gi|293510791|ref|NZ_GG749316.1|	1.443	98.557	200	13662	13862
Staphylococcus_#_aureus_!_subsp._{_aureus_}_M809_genomic_scaffold_supercont1.19_whole_genome_shotgun_sequence|gi|293510809|ref|NZ_GG749317.1|	0.313	99.687	200	63707	63907
Staphylococcus_#_aureus_!_subsp._{_aureus_}_M899_genomic_scaffold_supercont1.12_whole_genome_shotgun_sequence|gi|282914805|ref|NZ_GG730201.1|	1.443	98.557	200	13661	13861
Staphylococcus_#_aureus_!_subsp._{_aureus_}_M899_genomic_scaffold_supercont1.13_whole_genome_shotgun_sequence|gi|282914823|ref|NZ_GG730202.1|	0.316	99.684	200	63074	63274
Staphylococcus_#_aureus_!_subsp._{_aureus_}_MRSA131_genomic_scaffold_Scfld18_whole_genome_shotgun_sequence|gi|422744992|ref|NZ_GL638165.1|	0.292	99.708	200	68282	68482
Staphylococcus_#_aureus_!_subsp._{_aureus_}_MRSA177_genomic_scaffold_Scfld427_whole_genome_shotgun_sequence|gi|422744599|ref|NZ_GL638241.1|	4.164	95.836	200	4603	4803
Staphylococcus_#_aureus_!_subsp._{_aureus_}_ST228_plasmid_pI1T1_complete_sequence_isolate_10388|gi|472455754|ref|NC_020530.1|	0.648	99.352	200	30654	30854
Staphylococcus_#_aureus_!_subsp._{_aureus_}_ST228_plasmid_pI2T2_complete_sequence_isolate_10497|gi|472455776|ref|NC_020531.1|	0.648	99.352	200	30654	30854
Staphylococcus_#_aureus_!_subsp._{_aureus_}_ST228_plasmid_pI3T3_complete_sequence_isolate_15532|gi|469823627|ref|NC_020565.1|	0.621	99.379	200	31984	32184
Staphylococcus_#_aureus_!_subsp._{_aureus_}_ST228_plasmid_pI4T8_complete_sequence_isolate_16035|gi|469816271|ref|NC_020534.1|	0.648	99.352	200	30653	30853
Staphylococcus_#_aureus_!_subsp._{_aureus_}_ST228_plasmid_pI5S5_complete_sequence_isolate_16125|gi|469816294|ref|NC_020535.1|	0.536	99.464	200	37085	37285
Staphylococcus_#_aureus_!_subsp._{_aureus_}_ST228_plasmid_pI6T6_complete_sequence_isolate_18341|gi|472455813|ref|NC_020567.1|	0.612	99.388	200	32500	32700
Staphylococcus_#_aureus_!_subsp._{_aureus_}_ST398_plasmid_pUR3912_isolate_C3912_complete_sequence|gi|507527156|ref|NC_020183.2|	3.238	96.762	200	5976	6176
Staphylococcus_#_aureus_!_subsp._{_aureus_}_TCH130_genomic_scaffold_SCAFFOLD7_whole_genome_shotgun_sequence|gi|255925769|ref|NZ_GG698164.1|	0.359	99.641	200	55535	55735
Staphylococcus_#_aureus_!_subsp._{_aureus_}_TW20_plasmid_pTW20_1_complete_sequence|gi|387144420|ref|NC_017352.1|	0.676	99.324	200	29385	29585
Staphylococcus_#_aureus_!_subsp._{_aureus_}_WW2703/97_genomic_scaffold_supercont1.23_whole_genome_shotgun_sequence|gi|282908628|ref|NZ_GG730242.1|	0.367	99.633	200	54224	54424
Staphylococcus_#_aureus_!_subsp._{_aureus_}_WW2703/97_genomic_scaffold_supercont1.31_whole_genome_shotgun_sequence|gi|282909479|ref|NZ_GG730250.1|	0.365	99.635	200	54654	54854
Staphylococcus_#_aureus_!_subsp._{_aureus_}_WW2703/97_genomic_scaffold_supercont1.4_whole_genome_shotgun_sequence|gi|282907756|ref|NZ_GG730223.1|	0.394	99.606	200	50528	50728
Staphylococcus_#_aureus_!_subsp._{_aureus_}_WW2703/97_genomic_scaffold_supercont1.9_whole_genome_shotgun_sequence|gi|282907844|ref|NZ_GG730228.1|	0.361	99.639	200	55186	55386
Staphylococcus_#_caprae_!_C87_{_genomic_}_scaffold_supercont1.5_whole_genome_shotgun_sequence|gi|314932855|ref|NZ_GL545271.1|	0.083	99.917	200	240689	240889
Staphylococcus_#_epidermidis_!_APO27_{_genomic_}_scaffold_APO27_scaffold40_whole_genome_shotgun_sequence|gi|520965452|ref|NZ_KE365473.1|	11.541	88.459	200	1533	1733
Staphylococcus_#_epidermidis_!_APO35_{_genomic_}_scaffold_APO35_scaffold201_whole_genome_shotgun_sequence|gi|520970557|ref|NZ_KE365652.1|	11.541	88.459	200	1533	1733
Staphylococcus_#_epidermidis_!_APO35_{_genomic_}_scaffold_APO35_scaffold67_whole_genome_shotgun_sequence|gi|520973216|ref|NZ_KE365908.1|	6.72	93.28	200	2776	2976
Staphylococcus_#_epidermidis_!_M0881_{_genomic_}_scaffold_acumm-supercont1.5_whole_genome_shotgun_sequence|gi|489047478|ref|NZ_KB821725.1|	0.235	99.765	200	84883	85083
Staphylococcus_#_epidermidis_!_M23864:W1_{_genomic_}_scaffold_SCAFFOLD2_whole_genome_shotgun_sequence|gi|254213012|ref|NZ_GG696774.1|	0.021	99.979	200	949420	949620
Staphylococcus_#_epidermidis_!_MC16_{_genomic_}_scaffold_MC16_scaffold32_whole_genome_shotgun_sequence|gi|520975696|ref|NZ_KE370163.1|	11.527	88.473	200	1535	1735
Staphylococcus_#_epidermidis_!_RP62A_{_plasmid_}_pSERP_complete_sequence|gi|57854744|ref|NC_006663.1|	0.732	99.268	200	27110	27310
Staphylococcus_#_epidermidis_!_SK398_{_plasmid_}_pSK639_complete_sequence|gi|42761430|ref|NC_005566.1|	2.496	97.504	200	7813	8013
Staphylococcus_#_epidermidis_!_Scl19_{_genomic_}_scaffold_Scl19_scaffold2_whole_genome_shotgun_sequence|gi|520977494|ref|NZ_KE366744.1|	15.279	84.721	200	1109	1309
Staphylococcus_#_epidermidis_!_Scl22_{_genomic_}_scaffold_Scl22_scaffold54_whole_genome_shotgun_sequence|gi|520978517|ref|NZ_KE367373.1|	11.541	88.459	200	1533	1733
Staphylococcus_#_epidermidis_!_Scl25_{_genomic_}_scaffold_Scl25_scaffold208_whole_genome_shotgun_sequence|gi|520978871|ref|NZ_KE367544.1|	12.195	87.805	200	1440	1640
Staphylococcus_#_epidermidis_!_Scl31_{_genomic_}_scaffold_Scl31_scaffold12_whole_genome_shotgun_sequence|gi|520979433|ref|NZ_KE367825.1|	12.87	87.13	200	1354	1554
Staphylococcus_#_epidermidis_!_Sentile1_{_genomic_}_scaffold_Sentile1_scaffold64_whole_genome_shotgun_sequence|gi|520981017|ref|NZ_KE368749.1|	11.541	88.459	200	1533	1733
Staphylococcus_#_epidermidis_!_Sentile2_{_genomic_}_scaffold_Sentile2_scaffold60_whole_genome_shotgun_sequence|gi|520981692|ref|NZ_KE369149.1|	11.758	88.242	200	1501	1701
Staphylococcus_#_epidermidis_!_W23144_{_genomic_}_scaffold_SCAFFOLD1_whole_genome_shotgun_sequence|gi|254212919|ref|NZ_GG696799.1|	0.015	99.985	200	1365325	1365525
Staphylococcus_#_epidermidis_!_W23144_{_genomic_}_scaffold_SCAFFOLD2_whole_genome_shotgun_sequence|gi|254212920|ref|NZ_GG696800.1|	0.031	99.969	200	650236	650436
Staphylococcus_#_epidermidis_!_WI05_{_genomic_}_scaffold_WI05_scaffold114_whole_genome_shotgun_sequence|gi|520981788|ref|NZ_KE369209.1|	17.637	82.363	200	934	1134
Staphylococcus_#_epidermidis_!_WI09_{_genomic_}_scaffold_WI09_scaffold54_whole_genome_shotgun_sequence|gi|520982826|ref|NZ_KE369868.1|	11.772	88.228	200	1499	1699
Staphylococcus_#_hominis_!_subsp._{_hominis_}_C80_genomic_scaffold_supercont1.7_whole_genome_shotgun_sequence|gi|314935982|ref|NZ_GL545258.1|	0.189	99.811	200	105818	106018
Staphylococcus_#_simulans_!_ACS-120-V-Sch1_{_genomic_}_scaffold_supercont1.1_whole_genome_shotgun_sequence|gi|448879137|ref|NZ_KB373326.1|	0.02	99.98	200	1022931	1023131
Staphylococcus_#_simulans_!_ACS-120-V-Sch1_{_genomic_}_scaffold_supercont1.3_whole_genome_shotgun_sequence|gi|448879139|ref|NZ_KB373328.1|	0.06	99.94	200	333404	333604
Staphylococcus_#_simulans_!_ACS-120-V-Sch1_{_genomic_}_scaffold_supercont1.7_whole_genome_shotgun_sequence|gi|448879143|ref|NZ_KB373332.1|	0.346	99.654	200	57591	57791
Staphylococcus_#_warneri_!_SG1_{_plasmid_}_clone_pvSw1_genomic_sequence|gi|462045533|ref|NC_020274.1|	1.517	98.483	200	12986	13186
Staphylococcus_#_epidermidis_!_Scl19_{_genomic_}_scaffold_Scl19_scaffold1_whole_genome_shotgun_sequence|gi|520977330|ref|NZ_KE366633.1|	7.346	92.654	155	1955	2110
Staphylococcus_#_aureus_!_M0326_{_genomic_}_scaffold_acrHf-supercont1.8_whole_genome_shotgun_sequence|gi|486270247|ref|NZ_KB821209.1|	0.009	99.991	101	1117757	1117858
Staphylococcus_#_aureus_!_M0562_{_genomic_}_scaffold_acumS-supercont1.2_whole_genome_shotgun_sequence|gi|487370195|ref|NZ_KB821471.1|	0.01	99.99	101	1037639	1037740
Staphylococcus_#_aureus_!_M0663_{_genomic_}_scaffold_acuoc-supercont1.3_whole_genome_shotgun_sequence|gi|487381992|ref|NZ_KB821554.1|	0.227	99.773	101	44296	44397
Staphylococcus_#_aureus_!_M1248_{_genomic_}_scaffold_acunw-supercont1.3_whole_genome_shotgun_sequence|gi|486648723|ref|NZ_KB822101.1|	0.014	99.986	101	741376	741477
Staphylococcus_#_aureus_!_M1405_{_genomic_}_scaffold_acumh-supercont1.3_whole_genome_shotgun_sequence|gi|487399052|ref|NZ_KB822543.1|	0.013	99.987	101	805130	805231
Staphylococcus_#_aureus_!_M1544_{_genomic_}_scaffold_acunm-supercont1.6_whole_genome_shotgun_sequence|gi|487139172|ref|NZ_KB822281.1|	0.012	99.988	101	815288	815389
Staphylococcus_#_lugdunensis_!_ACS-027-V-Sch2_{_genomic_}_scaffold_supercont1.2_whole_genome_shotgun_sequence|gi|448879134|ref|NZ_KB373323.1|	0.023	99.977	101	444874	444975
Staphylococcus_#_lugdunensis_!_M23590_{_genomic_}_scaffold_SCAFFOLD2_whole_genome_shotgun_sequence|gi|319430685|ref|NZ_GL622352.1|	0.01	99.99	101	1009886	1009987
Staphylococcus_#_lugdunensis_!_M23590_{_genomic_}_scaffold_SCAFFOLD3_whole_genome_shotgun_sequence|gi|319430686|ref|NZ_GL622353.1|	0.121	99.879	101	83694	83795
Staphylococcus_#_massiliensis_!_CCUG_{_55927_}_scaffold00005_whole_genome_shotgun_sequence|gi|484269228|ref|NZ_JH815597.1|	0.112	99.888	101	90223	90324
Anoxybacillus_#_flavithermus_!_WK1_{_chromosome_}_complete_genome|gi|212637849|ref|NC_011567.1|	0.004	99.996	100	2846646	2846746
Bacillus_#_amyloliquefaciens_!_subsp._{_amyloliquefaciens_}_DC-12_Scaffold11_whole_genome_shotgun_sequence|gi|482790849|ref|NZ_KB206096.1|	2.977	97.023	100	3259	3359
Bacillus_#_cereus_!_AH676_{_chromosome_}_whole_genome_shotgun_sequence|gi|238801490|ref|NZ_CM000738.1|	0.002	99.998	100	5594647	5594747
Bacillus_#_cereus_!_B5-2_{_genomic_}_scaffold_acqwr-supercont1.15_whole_genome_shotgun_sequence|gi|507066153|ref|NZ_KB976960.1|	0.018	99.982	100	561029	561129
Bacillus_#_cereus_!_B5-2_{_genomic_}_scaffold_acqwr-supercont1.4_whole_genome_shotgun_sequence|gi|507066205|ref|NZ_KB976973.1|	0.072	99.928	100	139155	139255
Bacillus_#_cereus_!_B5-2_{_genomic_}_scaffold_acqwr-supercont1.7_whole_genome_shotgun_sequence|gi|507066230|ref|NZ_KB976976.1|	0.048	99.952	100	208179	208279
Bacillus_#_cereus_!_B5-2_{_genomic_}_scaffold_acqwr-supercont1.8_whole_genome_shotgun_sequence|gi|507066244|ref|NZ_KB976977.1|	0.046	99.954	100	216941	217041
Bacillus_#_cereus_!_BAG1O-1_{_genomic_}_scaffold_acrHm-supercont1.3_whole_genome_shotgun_sequence|gi|506987768|ref|NZ_KB976293.1|	0.103	99.897	100	97273	97373
Bacillus_#_cereus_!_BAG1O-1_{_genomic_}_scaffold_acrHm-supercont1.4_whole_genome_shotgun_sequence|gi|506987769|ref|NZ_KB976294.1|	0.407	99.593	100	24473	24573
Bacillus_#_cereus_!_BAG1O-1_{_genomic_}_scaffold_acrHm-supercont1.5_whole_genome_shotgun_sequence|gi|506987770|ref|NZ_KB976295.1|	0.48	99.52	100	20723	20823
Bacillus_#_cereus_!_BAG1O-3_{_genomic_}_scaffold_supercont1.3_whole_genome_shotgun_sequence|gi|514961979|ref|NZ_KE332538.1|	0.024	99.976	100	410161	410261
Bacillus_#_cereus_!_BAG1X1-1_{_genomic_}_scaffold_acfXz-supercont1.5_whole_genome_shotgun_sequence|gi|506995317|ref|NZ_KB976168.1|	0.067	99.933	100	150107	150207
Bacillus_#_cereus_!_BAG1X2-2_{_genomic_}_scaffold_achrl-supercont1.8_whole_genome_shotgun_sequence|gi|506996368|ref|NZ_KB976233.1|	0.15	99.85	100	66572	66672
Bacillus_#_cereus_!_BAG1X2-3_{_genomic_}_scaffold_acrGT-supercont1.2_whole_genome_shotgun_sequence|gi|506999041|ref|NZ_KB976246.1|	0.066	99.934	100	152538	152638
Bacillus_#_cereus_!_BAG3O-1_{_genomic_}_scaffold_acqxM-supercont1.1_whole_genome_shotgun_sequence|gi|507062631|ref|NZ_KB976979.1|	0.145	99.855	100	69067	69167
Bacillus_#_cereus_!_BAG3O-1_{_genomic_}_scaffold_acqxM-supercont1.4_whole_genome_shotgun_sequence|gi|507065342|ref|NZ_KB976982.1|	0.017	99.983	100	594335	594435
Bacillus_#_cereus_!_BAG5X12-1_{_genomic_}_scaffold_acfXH-supercont1.1_whole_genome_shotgun_sequence|gi|507017978|ref|NZ_KB976553.1|	0.002	99.998	100	4417169	4417269
Bacillus_#_cereus_!_BAG5X12-1_{_genomic_}_scaffold_acfXH-supercont1.2_whole_genome_shotgun_sequence|gi|507017983|ref|NZ_KB976554.1|	0.017	99.983	100	597800	597900
Bacillus_#_cereus_!_BDRD-Cer4_{_chromosome_}_whole_genome_shotgun_sequence|gi|238801478|ref|NZ_CM000726.1|	0.002	99.998	100	5397350	5397450
Bacillus_#_cereus_!_BMG1.7_{_genomic_}_scaffold_acqVx-supercont1.4_whole_genome_shotgun_sequence|gi|507018357|ref|NZ_KB976593.1|	0.022	99.978	100	457461	457561
Bacillus_#_cereus_!_BMG1.7_{_genomic_}_scaffold_acqVx-supercont1.9_whole_genome_shotgun_sequence|gi|507018537|ref|NZ_KB976598.1|	0.059	99.941	100	168185	168285
Bacillus_#_cereus_!_F_{_BC_chr_circular_}_chromosome_whole_genome_shotgun_sequence|gi|481032311|ref|NZ_CM001787.1|	0.002	99.998	100	5255672	5255772
Bacillus_#_cereus_!_HuA2-3_{_genomic_}_scaffold_acrHg-supercont1.9_whole_genome_shotgun_sequence|gi|507019249|ref|NZ_KB976671.1|	0.002	99.998	100	4008303	4008403
Bacillus_#_cereus_!_HuA2-9_{_genomic_}_scaffold_acqVt-supercont1.3_whole_genome_shotgun_sequence|gi|507021592|ref|NZ_KB976154.1|	0.015	99.985	100	669169	669269
Bacillus_#_cereus_!_HuA3-9_{_genomic_}_scaffold_acqVv-supercont1.9_whole_genome_shotgun_sequence|gi|507025190|ref|NZ_KB976151.1|	0.05	99.95	100	200961	201061
Bacillus_#_cereus_!_HuB13-1_{_genomic_}_scaffold_acrGO-supercont1.10_whole_genome_shotgun_sequence|gi|507025193|ref|NZ_KB976600.1|	0.06	99.94	100	167310	167410
Bacillus_#_cereus_!_HuB13-1_{_genomic_}_scaffold_acrGO-supercont1.12_whole_genome_shotgun_sequence|gi|507025204|ref|NZ_KB976602.1|	0.135	99.865	100	73728	73828
Bacillus_#_cereus_!_HuB13-1_{_genomic_}_scaffold_acrGO-supercont1.17_whole_genome_shotgun_sequence|gi|507025306|ref|NZ_KB976607.1|	0.011	99.989	100	942837	942937
Bacillus_#_cereus_!_HuB13-1_{_genomic_}_scaffold_acrGO-supercont1.1_whole_genome_shotgun_sequence|gi|507025191|ref|NZ_KB976599.1|	0.598	99.402	100	16620	16720
Bacillus_#_cereus_!_HuB13-1_{_genomic_}_scaffold_acrGO-supercont1.2_whole_genome_shotgun_sequence|gi|507025315|ref|NZ_KB976610.1|	0.2	99.8	100	49830	49930
Bacillus_#_cereus_!_HuB13-1_{_genomic_}_scaffold_acrGO-supercont1.4_whole_genome_shotgun_sequence|gi|507025488|ref|NZ_KB976632.1|	0.061	99.939	100	163238	163338
Bacillus_#_cereus_!_HuB13-1_{_genomic_}_scaffold_acrGO-supercont1.7_whole_genome_shotgun_sequence|gi|507025513|ref|NZ_KB976644.1|	0.631	99.369	100	15749	15849
Bacillus_#_cereus_!_HuB4-4_{_genomic_}_scaffold_acqVu-supercont1.2_whole_genome_shotgun_sequence|gi|507027356|ref|NZ_KB976545.1|	0.021	99.979	100	481252	481352
Bacillus_#_cereus_!_IS075_{_genomic_}_scaffold_actac-supercont2.17_whole_genome_shotgun_sequence|gi|514340860|ref|NZ_KE150034.1|	0.56	99.44	100	17760	17860
Bacillus_#_cereus_!_IS075_{_genomic_}_scaffold_actac-supercont2.18_whole_genome_shotgun_sequence|gi|514340861|ref|NZ_KE150035.1|	0.604	99.396	100	16459	16559
Bacillus_#_cereus_!_IS075_{_genomic_}_scaffold_actac-supercont2.2_whole_genome_shotgun_sequence|gi|514340200|ref|NZ_KE150019.1|	0.013	99.987	100	774805	774905
Bacillus_#_cereus_!_IS075_{_genomic_}_scaffold_actac-supercont2.6_whole_genome_shotgun_sequence|gi|514340849|ref|NZ_KE150023.1|	0.04	99.96	100	251712	251812
Bacillus_#_cereus_!_IS075_{_genomic_}_scaffold_actac-supercont2.8_whole_genome_shotgun_sequence|gi|514340851|ref|NZ_KE150025.1|	0.099	99.901	100	101151	101251
Bacillus_#_cereus_!_IS195_{_genomic_}_scaffold_acqVz-supercont1.7_whole_genome_shotgun_sequence|gi|507027850|ref|NZ_KB976335.1|	0.202	99.798	100	49379	49479
Bacillus_#_cereus_!_IS845/00_{_genomic_}_scaffold_acqVA-supercont1.1_whole_genome_shotgun_sequence|gi|507027882|ref|NZ_KB976311.1|	0.004	99.996	100	2460485	2460585
Bacillus_#_cereus_!_ISP2954_{_genomic_}_scaffold_acrHh-supercont1.11_whole_genome_shotgun_sequence|gi|507027943|ref|NZ_KB976742.1|	0.148	99.852	100	67689	67789
Bacillus_#_cereus_!_ISP2954_{_genomic_}_scaffold_acrHh-supercont1.1_whole_genome_shotgun_sequence|gi|507027932|ref|NZ_KB976740.1|	0.518	99.482	100	19194	19294
Bacillus_#_cereus_!_ISP2954_{_genomic_}_scaffold_acrHh-supercont1.6_whole_genome_shotgun_sequence|gi|507028129|ref|NZ_KB976787.1|	0.462	99.538	100	21565	21665
Bacillus_#_cereus_!_ISP2954_{_genomic_}_scaffold_acrHh-supercont1.7_whole_genome_shotgun_sequence|gi|507028130|ref|NZ_KB976788.1|	1.297	98.703	100	7608	7708
Bacillus_#_cereus_!_ISP2954_{_genomic_}_scaffold_acrHh-supercont1.9_whole_genome_shotgun_sequence|gi|507028133|ref|NZ_KB976790.1|	0.059	99.941	100	168756	168856
Bacillus_#_cereus_!_MC118_{_genomic_}_scaffold_actXO-supercont1.169_whole_genome_shotgun_sequence|gi|507028493|ref|NZ_KB976415.1|	4.016	95.984	100	2390	2490
Bacillus_#_cereus_!_MC118_{_genomic_}_scaffold_actXO-supercont1.178_whole_genome_shotgun_sequence|gi|507028523|ref|NZ_KB976425.1|	7.479	92.521	100	1237	1337
Bacillus_#_cereus_!_MSX-A12_{_genomic_}_scaffold_supercont1.2_whole_genome_shotgun_sequence|gi|423568927|ref|NZ_JH792030.1|	0.007	99.993	100	1533305	1533405
Bacillus_#_cereus_!_MSX-A12_{_genomic_}_scaffold_supercont1.3_whole_genome_shotgun_sequence|gi|423570454|ref|NZ_JH792031.1|	0.016	99.984	100	611614	611714
Bacillus_#_cereus_!_MSX-A12_{_genomic_}_scaffold_supercont1.9_whole_genome_shotgun_sequence|gi|423571723|ref|NZ_JH792037.1|	0.138	99.862	100	72490	72590
Bacillus_#_cereus_!_Rock4-2_{_chromosome_}_whole_genome_shotgun_sequence|gi|238801486|ref|NZ_CM000734.1|	0.002	99.998	100	5769887	5769987
Bacillus_#_cereus_!_TIAC219_{_genomic_}_scaffold_actab-supercont2.12_whole_genome_shotgun_sequence|gi|505484056|ref|NZ_KB976011.1|	0.113	99.887	100	88083	88183
Bacillus_#_cereus_!_TIAC219_{_genomic_}_scaffold_actab-supercont2.5_whole_genome_shotgun_sequence|gi|505484220|ref|NZ_KB976040.1|	0.023	99.977	100	436062	436162
Bacillus_#_cereus_!_VD045_{_genomic_}_scaffold_supercont1.1_whole_genome_shotgun_sequence|gi|423584588|ref|NZ_JH792080.1|	0.002	99.998	100	4041945	4042045
Bacillus_#_cereus_!_VD045_{_genomic_}_scaffold_supercont1.2_whole_genome_shotgun_sequence|gi|423588747|ref|NZ_JH792081.1|	0.015	99.985	100	648838	648938
Bacillus_#_cereus_!_VD045_{_genomic_}_scaffold_supercont1.6_whole_genome_shotgun_sequence|gi|423590297|ref|NZ_JH792085.1|	0.046	99.954	100	217846	217946
Bacillus_#_cereus_!_VD045_{_genomic_}_scaffold_supercont1.7_whole_genome_shotgun_sequence|gi|423590480|ref|NZ_JH792086.1|	0.066	99.934	100	150484	150584
Bacillus_#_cereus_!_VD048_{_genomic_}_scaffold_supercont1.5_whole_genome_shotgun_sequence|gi|423596465|ref|NZ_JH792314.1|	0.041	99.959	100	241905	242005
Bacillus_#_cereus_!_VD048_{_genomic_}_scaffold_supercont1.6_whole_genome_shotgun_sequence|gi|423596675|ref|NZ_JH792315.1|	0.049	99.951	100	202189	202289
Bacillus_#_cereus_!_VD078_{_genomic_}_scaffold_supercont1.5_whole_genome_shotgun_sequence|gi|423603230|ref|NZ_JH792255.1|	0.628	99.372	100	15828	15928
Bacillus_#_cereus_!_VD102_{_genomic_}_scaffold_supercont1.2_whole_genome_shotgun_sequence|gi|423608097|ref|NZ_JH792240.1|	0.015	99.985	100	678917	679017
Bacillus_#_cereus_!_VD131_{_genomic_}_scaffold_acrHi-supercont1.2_whole_genome_shotgun_sequence|gi|507035710|ref|NZ_KB976653.1|	0.066	99.934	100	151644	151744
Bacillus_#_cereus_!_VD136_{_genomic_}_scaffold_acrHc-supercont1.10_whole_genome_shotgun_sequence|gi|507041344|ref|NZ_KB976718.1|	0.051	99.949	100	195624	195724
Bacillus_#_cereus_!_VD136_{_genomic_}_scaffold_acrHc-supercont1.1_whole_genome_shotgun_sequence|gi|507041177|ref|NZ_KB976717.1|	0.017	99.983	100	590608	590708
Bacillus_#_cereus_!_VD136_{_genomic_}_scaffold_acrHc-supercont1.3_whole_genome_shotgun_sequence|gi|507045884|ref|NZ_KB976733.1|	0.197	99.803	100	50631	50731
Bacillus_#_cereus_!_VD136_{_genomic_}_scaffold_acrHc-supercont1.4_whole_genome_shotgun_sequence|gi|507045922|ref|NZ_KB976734.1|	0.157	99.843	100	63705	63805
Bacillus_#_cereus_!_VD140_{_genomic_}_scaffold_acrGW-supercont1.16_whole_genome_shotgun_sequence|gi|507047952|ref|NZ_KB976808.1|	0.017	99.983	100	586186	586286
Bacillus_#_cereus_!_VD140_{_genomic_}_scaffold_acrGW-supercont1.5_whole_genome_shotgun_sequence|gi|507048003|ref|NZ_KB976812.1|	0.329	99.671	100	30333	30433
Bacillus_#_cereus_!_VD142_{_genomic_}_scaffold_actaa-supercont2.19_whole_genome_shotgun_sequence|gi|514343597|ref|NZ_KE150062.1|	2.918	97.082	100	3327	3427
Bacillus_#_cereus_!_VD142_{_genomic_}_scaffold_actaa-supercont2.8_whole_genome_shotgun_sequence|gi|514343586|ref|NZ_KE150051.1|	0.047	99.953	100	212349	212449
Bacillus_#_cereus_!_VD146_{_genomic_}_scaffold_acrHl-supercont1.14_whole_genome_shotgun_sequence|gi|507049958|ref|NZ_KB976677.1|	0.003	99.997	100	3880379	3880479
Bacillus_#_cereus_!_VD146_{_genomic_}_scaffold_acrHl-supercont1.7_whole_genome_shotgun_sequence|gi|507050419|ref|NZ_KB976690.1|	0.047	99.953	100	214666	214766
Bacillus_#_cereus_!_VD166_{_genomic_}_scaffold_supercont1.1_whole_genome_shotgun_sequence|gi|423640055|ref|NZ_JH791854.1|	0.002	99.998	100	4009488	4009588
Bacillus_#_cereus_!_VD166_{_genomic_}_scaffold_supercont1.6_whole_genome_shotgun_sequence|gi|423645714|ref|NZ_JH791859.1|	0.048	99.952	100	207172	207272
Bacillus_#_cereus_!_VD184_{_genomic_}_scaffold_acrGY-supercont1.13_whole_genome_shotgun_sequence|gi|507050806|ref|NZ_KB976821.1|	0.085	99.915	100	117104	117204
Bacillus_#_cereus_!_VD184_{_genomic_}_scaffold_acrGY-supercont1.15_whole_genome_shotgun_sequence|gi|507050921|ref|NZ_KB976823.1|	0.189	99.811	100	52718	52818
Bacillus_#_cereus_!_VD184_{_genomic_}_scaffold_acrGY-supercont1.1_whole_genome_shotgun_sequence|gi|507050496|ref|NZ_KB976817.1|	0.348	99.652	100	28668	28768
Bacillus_#_cereus_!_VD184_{_genomic_}_scaffold_acrGY-supercont1.3_whole_genome_shotgun_sequence|gi|507052637|ref|NZ_KB976839.1|	0.192	99.808	100	51856	51956
Bacillus_#_cereus_!_VD184_{_genomic_}_scaffold_acrGY-supercont1.5_whole_genome_shotgun_sequence|gi|507053252|ref|NZ_KB976859.1|	0.11	99.89	100	90924	91024
Bacillus_#_cereus_!_VD184_{_genomic_}_scaffold_acrGY-supercont1.7_whole_genome_shotgun_sequence|gi|507053258|ref|NZ_KB976861.1|	2.436	97.564	100	4005	4105
Bacillus_#_cereus_!_VD184_{_genomic_}_scaffold_acrGY-supercont1.8_whole_genome_shotgun_sequence|gi|507053264|ref|NZ_KB976862.1|	0.765	99.235	100	12972	13072
Bacillus_#_cereus_!_VD196_{_genomic_}_scaffold_acqVw-supercont1.11_whole_genome_shotgun_sequence|gi|507054318|ref|NZ_KB976256.1|	0.188	99.812	100	53023	53123
Bacillus_#_cereus_!_VD196_{_genomic_}_scaffold_acqVw-supercont1.8_whole_genome_shotgun_sequence|gi|507055234|ref|NZ_KB976271.1|	0.067	99.933	100	149783	149883
Bacillus_#_cereus_!_VD214_{_genomic_}_scaffold_acrHq-supercont1.5_whole_genome_shotgun_sequence|gi|507055511|ref|NZ_KB976703.1|	3.568	96.432	100	2703	2803
Bacillus_#_cereus_!_VDM006_{_genomic_}_scaffold_acrHb-supercont1.30_whole_genome_shotgun_sequence|gi|507061265|ref|NZ_KB976887.1|	0.009	99.991	100	1072334	1072434
Bacillus_#_cereus_!_VDM006_{_genomic_}_scaffold_acrHb-supercont1.31_whole_genome_shotgun_sequence|gi|507061305|ref|NZ_KB976888.1|	0.127	99.873	100	78651	78751
Bacillus_#_cereus_!_VDM006_{_genomic_}_scaffold_acrHb-supercont1.5_whole_genome_shotgun_sequence|gi|507061385|ref|NZ_KB976900.1|	0.548	99.452	100	18138	18238
Bacillus_#_cereus_!_VDM021_{_genomic_}_scaffold_acrHe-supercont1.10_whole_genome_shotgun_sequence|gi|507061630|ref|NZ_KB976906.1|	2.037	97.963	100	4810	4910
Bacillus_#_cereus_!_VDM021_{_genomic_}_scaffold_acrHe-supercont1.11_whole_genome_shotgun_sequence|gi|507061633|ref|NZ_KB976907.1|	0.937	99.063	100	10573	10673
Bacillus_#_cereus_!_VDM021_{_genomic_}_scaffold_acrHe-supercont1.3_whole_genome_shotgun_sequence|gi|507062122|ref|NZ_KB976927.1|	0.193	99.807	100	51676	51776
Bacillus_#_cereus_!_VDM021_{_genomic_}_scaffold_acrHe-supercont1.9_whole_genome_shotgun_sequence|gi|507062626|ref|NZ_KB976953.1|	2.196	97.804	100	4454	4554
Bacillus_#_cereus_!_VDM053_{_genomic_}_scaffold_acrGS-supercont1.7_whole_genome_shotgun_sequence|gi|507060152|ref|NZ_KB976714.1|	0.015	99.985	100	660905	661005
Bacillus_#_cereus_!_str._{_Schrouff_}_genomic_scaffold_acsZZ-supercont2.14_whole_genome_shotgun_sequence|gi|506986695|ref|NZ_KB976112.1|	2.277	97.723	100	4291	4391
Bacillus_#_megaterium_!_QM_{_B1551_}_plasmid_pBM400_complete_sequence|gi|294663009|ref|NC_004604.2|	0.186	99.814	100	53765	53865
Bacillus_#_megaterium_!_WSH-002_{_plasmid_}_WSH-002_p1_complete_sequence|gi|384044106|ref|NC_017139.1|	0.134	99.866	100	74513	74613
Bacillus_#_mycoides_!_DSM_{_2048_}_chromosome_whole_genome_shotgun_sequence|gi|238801494|ref|NZ_CM000742.1|	0.002	99.998	100	5561806	5561906
Bacillus_#_mycoides_!_Rock1-4_{_chromosome_}_whole_genome_shotgun_sequence|gi|238801495|ref|NZ_CM000743.1|	0.002	99.998	100	5841397	5841497
Bacillus_#_mycoides_!_Rock3-17_{_chromosome_}_whole_genome_shotgun_sequence|gi|238801496|ref|NZ_CM000744.1|	0.002	99.998	100	5713854	5713954
Bacillus_#_pseudomycoides_!_DSM_{_12442_}_chromosome_whole_genome_shotgun_sequence|gi|238801497|ref|NZ_CM000745.1|	0.002	99.998	100	5782414	5782514
Bacillus_#_smithii_!_7_3_47FAA_{_genomic_}_scaffold_supercont1.15_whole_genome_shotgun_sequence|gi|365158327|ref|NZ_JH414752.1|	0.105	99.895	100	95110	95210
Bacillus_#_smithii_!_7_3_47FAA_{_genomic_}_scaffold_supercont1.26_whole_genome_shotgun_sequence|gi|365158338|ref|NZ_JH414763.1|	0.623	99.377	100	15950	16050
Bacillus_#_smithii_!_7_3_47FAA_{_genomic_}_scaffold_supercont1.2_whole_genome_shotgun_sequence|gi|365158314|ref|NZ_JH414739.1|	0.158	99.842	100	63379	63479
Bacillus_#_smithii_!_7_3_47FAA_{_genomic_}_scaffold_supercont1.4_whole_genome_shotgun_sequence|gi|365158316|ref|NZ_JH414741.1|	0.233	99.767	100	42796	42896
Bacillus_#_smithii_!_7_3_47FAA_{_genomic_}_scaffold_supercont1.8_whole_genome_shotgun_sequence|gi|365158320|ref|NZ_JH414745.1|	0.097	99.903	100	103287	103387
Bacillus_#_sp._!_10403023_{_MM10403188_}_genomic_scaffold_scaffold00011_whole_genome_shotgun_sequence|gi|403048286|ref|NZ_HE610995.1|	3.414	96.586	100	2829	2929
Bacillus_#_sp._!_FJAT-13831_{_Scaffold8_}_whole_genome_shotgun_sequence|gi|484230482|ref|NZ_JH921522.1|	0.095	99.905	100	105395	105495
Bacillus_#_sp._!_NRRL_{_B-14911_}_scf_1099999053198_genomic_scaffold_whole_genome_shotgun_sequence|gi|211593979|ref|NZ_CH672361.1|	0.045	99.955	100	222799	222899
Bacillus_#_sp._!_NRRL_{_B-14911_}_scf_1099999053199_genomic_scaffold_whole_genome_shotgun_sequence|gi|211593988|ref|NZ_CH672370.1|	0.454	99.546	100	21921	22021
Bacillus_#_sp._!_NRRL_{_B-14911_}_scf_1099999053200_genomic_scaffold_whole_genome_shotgun_sequence|gi|211593973|ref|NZ_CH672355.1|	0.015	99.985	100	684832	684932
Bacillus_#_sp._!_NRRL_{_B-14911_}_scf_1099999053201_genomic_scaffold_whole_genome_shotgun_sequence|gi|211593982|ref|NZ_CH672364.1|	0.067	99.933	100	149868	149968
Bacillus_#_subtilis_!_subsp._{_subtilis_}_str._AUSI98_contig7180000001101_whole_genome_shotgun_sequence|gi|485455465|ref|NZ_JH600079.1|	4.46	95.54	100	2142	2242
Bacillus_#_subtilis_!_subsp._{_subtilis_}_str._AUSI98_contig7180000001116_whole_genome_shotgun_sequence|gi|485455479|ref|NZ_JH600093.1|	8.244	91.756	100	1113	1213
Bacillus_#_subtilis_!_subsp._{_subtilis_}_str._AUSI98_contig7180000001165_whole_genome_shotgun_sequence|gi|485455528|ref|NZ_JH600141.1|	0.982	99.018	100	10082	10182
Bacillus_#_subtilis_!_subsp._{_subtilis_}_str._AUSI98_contig7180000001176_whole_genome_shotgun_sequence|gi|485455540|ref|NZ_JH600152.1|	0.934	99.066	100	10612	10712
Bacillus_#_subtilis_!_subsp._{_subtilis_}_str._AUSI98_contig7180000001183_whole_genome_shotgun_sequence|gi|485455547|ref|NZ_JH600159.1|	0.946	99.054	100	10468	10568
Bacillus_#_subtilis_!_subsp._{_subtilis_}_str._AUSI98_contig7180000001184_whole_genome_shotgun_sequence|gi|485455548|ref|NZ_JH600160.1|	0.093	99.907	100	107971	108071
Bacillus_#_subtilis_!_subsp._{_subtilis_}_str._AUSI98_contig7180000001195_whole_genome_shotgun_sequence|gi|485455559|ref|NZ_JH600171.1|	0.124	99.876	100	80740	80840
Bacillus_#_subtilis_!_subsp._{_subtilis_}_str._AUSI98_contig7180000001200_whole_genome_shotgun_sequence|gi|485455564|ref|NZ_JH600176.1|	0.176	99.824	100	56614	56714
Bacillus_#_subtilis_!_subsp._{_subtilis_}_str._AUSI98_contig7180000001201_whole_genome_shotgun_sequence|gi|485455565|ref|NZ_JH600177.1|	0.064	99.936	100	155510	155610
Bacillus_#_subtilis_!_subsp._{_subtilis_}_str._AUSI98_contig7180000001208_whole_genome_shotgun_sequence|gi|485455572|ref|NZ_JH600184.1|	0.674	99.326	100	14746	14846
Bacillus_#_thuringiensis_!_Bt407_{_chromosome_}_whole_genome_shotgun_sequence|gi|238801499|ref|NZ_CM000747.1|	0.002	99.998	100	6026743	6026843
Bacillus_#_thuringiensis_!_IBL_{_200_}_chromosome_whole_genome_shotgun_sequence|gi|238801510|ref|NZ_CM000758.1|	0.001	99.999	100	6731690	6731790
Bacillus_#_thuringiensis_!_IBL_{_4222_}_chromosome_whole_genome_shotgun_sequence|gi|238801511|ref|NZ_CM000759.1|	0.002	99.998	100	6612332	6612432
Bacillus_#_thuringiensis_!_serovar_{_andalousiensis_}_BGSC_4AW1_chromosome_whole_genome_shotgun_sequence|gi|238801506|ref|NZ_CM000754.1|	0.002	99.998	100	5488744	5488844
Bacillus_#_thuringiensis_!_serovar_{_berliner_}_ATCC_10792_chromosome_whole_genome_shotgun_sequence|gi|238801505|ref|NZ_CM000753.1|	0.002	99.998	100	6260042	6260142
Bacillus_#_thuringiensis_!_serovar_{_huazhongensis_}_BGSC_4BD1_chromosome_whole_genome_shotgun_sequence|gi|238801508|ref|NZ_CM000756.1|	0.002	99.998	100	6231096	6231196
Bacillus_#_thuringiensis_!_serovar_{_kurstaki_}_str._T03a001_chromosome_whole_genome_shotgun_sequence|gi|238801503|ref|NZ_CM000751.1|	0.002	99.998	100	5527468	5527568
Bacillus_#_thuringiensis_!_serovar_{_monterrey_}_BGSC_4AJ1_chromosome_whole_genome_shotgun_sequence|gi|238801504|ref|NZ_CM000752.1|	0.002	99.998	100	6488924	6489024
Bacillus_#_thuringiensis_!_serovar_{_pondicheriensis_}_BGSC_4BA1_chromosome_whole_genome_shotgun_sequence|gi|238801507|ref|NZ_CM000755.1|	0.002	99.998	100	6031375	6031475
Bacillus_#_thuringiensis_!_serovar_{_pulsiensis_}_BGSC_4CC1_chromosome_whole_genome_shotgun_sequence|gi|238801509|ref|NZ_CM000757.1|	0.002	99.998	100	6002503	6002603
Bacillus_#_thuringiensis_!_serovar_{_sotto_}_str._T04001_chromosome_whole_genome_shotgun_sequence|gi|238801501|ref|NZ_CM000749.1|	0.002	99.998	100	6107646	6107746
Bacillus_#_thuringiensis_!_serovar_{_thuringiensis_}_str._T01001_chromosome_whole_genome_shotgun_sequence|gi|238801500|ref|NZ_CM000748.1|	0.002	99.998	100	6323023	6323123
Bacillus_#_thuringiensis_!_serovar_{_tochigiensis_}_BGSC_4Y1_chromosome_whole_genome_shotgun_sequence|gi|238801498|ref|NZ_CM000746.1|	0.002	99.998	100	5625806	5625906
Bacillus_#_vallismortis_!_DV1-F-3_{_genomic_}_scaffold_scf7180000000871_whole_genome_shotgun_sequence|gi|397738307|ref|NZ_JH600199.1|	0.343	99.657	100	29013	29113
Bacillus_#_vallismortis_!_DV1-F-3_{_genomic_}_scaffold_scf7180000000873_whole_genome_shotgun_sequence|gi|397738309|ref|NZ_JH600201.1|	0.199	99.801	100	50128	50228
Bacillus_#_vallismortis_!_DV1-F-3_{_genomic_}_scaffold_scf7180000000950_whole_genome_shotgun_sequence|gi|397738383|ref|NZ_JH600275.1|	9.606	90.394	100	941	1041
Blautia_#_producta_!_ATCC_{_27340_}_B132DRAFT_scaffold_65.66_whole_genome_shotgun_sequence|gi|483985095|ref|NZ_KB892699.1|	7.519	92.481	100	1230	1330
Brucella_#_sp._!_NVSL_{_07-0026_}_genomic_scaffold_supercont1.10_whole_genome_shotgun_sequence|gi|294850894|ref|NZ_GG770505.1|	8.562	91.438	100	1068	1168
Dolosigranulum_#_pigrum_!_ATCC_{_51524_}_genomic_scaffold_supercont1.2_whole_genome_shotgun_sequence|gi|375089282|ref|NZ_JH601104.1|	0.03	99.97	100	338509	338609
Enterococcus_#_faecalis_!_B1586_{_genomic_}_scaffold_acHWH-supercont1.3_whole_genome_shotgun_sequence|gi|500991587|ref|NZ_KB932438.1|	0.279	99.721	100	35742	35842
Enterococcus_#_faecalis_!_B1696_{_genomic_}_scaffold_acHXL-supercont1.7_whole_genome_shotgun_sequence|gi|501001055|ref|NZ_KB932459.1|	0.211	99.789	100	47224	47324
Enterococcus_#_faecalis_!_B1851_{_genomic_}_scaffold_acEPj-supercont1.9_whole_genome_shotgun_sequence|gi|505721623|ref|NZ_KB948380.1|	3.398	96.602	100	2843	2943
Enterococcus_#_faecalis_!_B1921_{_genomic_}_scaffold_acEPi-supercont1.15_whole_genome_shotgun_sequence|gi|505721690|ref|NZ_KB948387.1|	5.211	94.789	100	1819	1919
Enterococcus_#_faecalis_!_B1933_{_genomic_}_scaffold_acEPg-supercont1.9_whole_genome_shotgun_sequence|gi|505721719|ref|NZ_KB948416.1|	1.669	98.331	100	5892	5992
Enterococcus_#_faecalis_!_B2207_{_genomic_}_scaffold_acHYl-supercont1.14_whole_genome_shotgun_sequence|gi|501018682|ref|NZ_KB945583.1|	5.482	94.518	100	1724	1824
Enterococcus_#_faecalis_!_B2802_{_genomic_}_scaffold_acEQk-supercont1.29_whole_genome_shotgun_sequence|gi|505728810|ref|NZ_KB948638.1|	3.446	96.554	100	2802	2902
Enterococcus_#_faecalis_!_B2813_{_genomic_}_scaffold_acEQH-supercont1.13_whole_genome_shotgun_sequence|gi|505728828|ref|NZ_KB948656.1|	3.446	96.554	100	2802	2902
Enterococcus_#_faecalis_!_B4259_{_genomic_}_scaffold_acEPm-supercont1.26_whole_genome_shotgun_sequence|gi|505741655|ref|NZ_KB949065.1|	1.186	98.814	100	8332	8432
Enterococcus_#_faecalis_!_B4568_{_genomic_}_scaffold_acEPp-supercont1.25_whole_genome_shotgun_sequence|gi|505750514|ref|NZ_KB949224.1|	1.698	98.302	100	5788	5888
Enterococcus_#_faecalis_!_CH188_{_genomic_}_scaffold_supercont1.24_whole_genome_shotgun_sequence|gi|242359826|ref|NZ_GG688673.1|	15.432	84.568	100	548	648
Enterococcus_#_faecalis_!_CH570_{_genomic_}_scaffold_acEPs-supercont1.12_whole_genome_shotgun_sequence|gi|501877935|ref|NZ_KB947177.1|	2.116	97.884	100	4626	4726
Enterococcus_#_faecalis_!_ERV81_{_genomic_}_scaffold_Scfld864_whole_genome_shotgun_sequence|gi|424734331|ref|NZ_JH805133.1|	1.723	98.277	100	5704	5804
Enterococcus_#_faecalis_!_Merz151_{_genomic_}_scaffold_acAqZ-supercont1.5_whole_genome_shotgun_sequence|gi|502310897|ref|NZ_KB944787.1|	0.019	99.981	100	516425	516525
Enterococcus_#_faecalis_!_SF1592_{_genomic_}_scaffold_acvKc-supercont1.17_whole_genome_shotgun_sequence|gi|501589707|ref|NZ_KB946577.1|	0.507	99.493	100	19617	19717
Enterococcus_#_faecalis_!_SF28073_{_genomic_}_scaffold_acvKg-supercont1.40_whole_genome_shotgun_sequence|gi|501576302|ref|NZ_KB946474.1|	4.577	95.423	100	2085	2185
Enterococcus_#_faecalis_!_SF350_{_genomic_}_scaffold_acHXt-supercont1.6_whole_genome_shotgun_sequence|gi|502435002|ref|NZ_KB933496.1|	0.038	99.962	100	263961	264061
Enterococcus_#_faecalis_!_TX0645_{_genomic_}_scaffold_Scfld25_whole_genome_shotgun_sequence|gi|422731169|ref|NZ_GL457086.1|	12.937	87.063	100	673	773
Enterococcus_#_faecalis_!_WH257_{_genomic_}_scaffold_acvKu-supercont1.22_whole_genome_shotgun_sequence|gi|501585607|ref|NZ_KB946528.1|	0.477	99.523	100	20872	20972
Gemella_#_haemolysans_!_M341_{_genomic_}_scaffold_supercont1.6_whole_genome_shotgun_sequence|gi|329768783|ref|NZ_GL883587.1|	1.809	98.191	100	5428	5528
Gemella_#_moribillum_!_M424_{_genomic_}_scaffold_supercont1.1_whole_genome_shotgun_sequence|gi|319430584|ref|NZ_GL622607.1|	0.012	99.988	100	805053	805153
Gracilibacillus_#_lacisalsi_!_DSM_{_19029_}_D569DRAFT_scaffold00043.43_whole_genome_shotgun_sequence|gi|484065430|ref|NZ_KB898704.1|	7.485	92.515	100	1236	1336
Kurthia_#_sp._!_JC30_{_JC30T_}_genomic_scaffold_scaffold00017_whole_genome_shotgun_sequence|gi|403048420|ref|NZ_HE611012.1|	3.254	96.746	100	2973	3073
Kurthia_#_sp._!_JC8E_{_JC8ET_}_genomic_scaffold_scaffold00016_whole_genome_shotgun_sequence|gi|403048717|ref|NZ_HE611079.1|	3.433	96.567	100	2813	2913
Lactobacillus_#_animalis_!_KCTC_{_3501_}_genomic_scaffold_scaffold00003_whole_genome_shotgun_sequence|gi|335230027|ref|NZ_GL573155.1|	2.002	97.998	100	4896	4996
Lactobacillus_#_antri_!_DSM_{_16041_}_genomic_scaffold_SCAFFOLD10_whole_genome_shotgun_sequence|gi|259048315|ref|NZ_GG700741.1|	3.233	96.767	100	2993	3093
Lactobacillus_#_brevis_!_subsp._{_gravesensis_}_ATCC_27305_genomic_scaffold_SCAFFOLD9_whole_genome_shotgun_sequence|gi|238694209|ref|NZ_GG669612.1|	1.899	98.101	100	5167	5267
Lactobacillus_#_buchneri_!_ATCC_{_11577_}_genomic_scaffold_SCAFFOLD7_whole_genome_shotgun_sequence|gi|238694313|ref|NZ_GG669716.1|	1.888	98.112	100	5197	5297
Lactobacillus_#_coleohominis_!_101-4-CHN_{_genomic_}_scaffold_supercont1.7_whole_genome_shotgun_sequence|gi|256848608|ref|NZ_GG698808.1|	1.852	98.148	100	5301	5401
Lactobacillus_#_farciminis_!_KCTC_{_3681_}_genomic_scaffold_scaffold00005_whole_genome_shotgun_sequence|gi|336232853|ref|NZ_GL575020.1|	1.829	98.171	100	5368	5468
Lactobacillus_#_fermentum_!_28-3-CHN_{_genomic_}_scaffold_supercont1.13_whole_genome_shotgun_sequence|gi|260663838|ref|NZ_GG704711.1|	1.908	98.092	100	5140	5240
Lactobacillus_#_fermentum_!_ATCC_{_14931_}_genomic_scaffold_SCAFFOLD10_whole_genome_shotgun_sequence|gi|238694506|ref|NZ_GG669909.1|	1.919	98.081	100	5111	5211
Lactobacillus_#_helveticus_!_DSM_{_20075_}_genomic_scaffold_SCAFFOLD16_whole_genome_shotgun_sequence|gi|259048341|ref|NZ_GG700767.1|	3.172	96.828	100	3053	3153
Lactobacillus_#_hilgardii_!_ATCC_{_8290_}_genomic_scaffold_SCAFFOLD10_whole_genome_shotgun_sequence|gi|238694598|ref|NZ_GG670001.1|	1.948	98.052	100	5033	5133
Lactobacillus_#_murinus_!_ASF361_{_genomic_}_scaffold_acLZi-supercont1.8_whole_genome_shotgun_sequence|gi|490153054|ref|NZ_KB822411.1|	0.143	99.857	100	69618	69718
Lactobacillus_#_murinus_!_ASF361_{_genomic_}_scaffold_acLZi-supercont1.9_whole_genome_shotgun_sequence|gi|490153147|ref|NZ_KB822412.1|	0.234	99.766	100	42654	42754
Lactobacillus_#_parabrevis_!_ATCC_{_53295_}_strain_RODS-DW_F810DRAFT_scaffold00091.91_whole_genome_shotgun_sequence|gi|487379377|ref|NZ_KB911455.1|	6.969	93.031	100	1335	1435
Lactobacillus_#_paracasei_!_subsp._{_paracasei_}_8700:2_supercont2.9_genomic_scaffold_whole_genome_shotgun_sequence|gi|223956187|ref|NZ_DS990493.1|	2.105	97.895	100	4650	4750
Lactobacillus_#_paracasei_!_subsp._{_paracasei_}_ATCC_25302_genomic_scaffold_SCAFFOLD21_whole_genome_shotgun_sequence|gi|238694769|ref|NZ_GG670172.1|	7.418	92.582	100	1248	1348
Lactobacillus_#_plantarum_!_UCMA_{_3037_}_genomic_scaffold_CONT_LACPL_000027A_whole_genome_shotgun_sequence|gi|470938491|ref|NZ_KB644938.1|	2.019	97.981	100	4853	4953
Lactobacillus_#_reuteri_!_CF48-3A_{_genomic_}_scaffold_SCAFFOLD22_whole_genome_shotgun_sequence|gi|251833327|ref|NZ_GG693685.1|	2.058	97.942	100	4759	4859
Lactobacillus_#_reuteri_!_MM2-3_{_genomic_}_scaffold_SCAFFOLD9_whole_genome_shotgun_sequence|gi|251833406|ref|NZ_GG693764.1|	1.971	98.029	100	4973	5073
Lactobacillus_#_rhamnosus_!_CASL_{_scaffold4_}_whole_genome_shotgun_sequence|gi|485462145|ref|NZ_JH158946.1|	6.09	93.91	100	1542	1642
Lactobacillus_#_rossiae_!_DSM_{_15814_}_l-ross-dsmz36220_scaffold_18_whole_genome_shotgun_sequence|gi|484345219|ref|NZ_JH724997.1|	1.916	98.084	100	5120	5220
Lactobacillus_#_salivarius_!_ATCC_{_11741_}_genomic_scaffold_SCAFFOLD7_whole_genome_shotgun_sequence|gi|242366437|ref|NZ_GG693227.1|	2.037	97.963	100	4810	4910
Lactobacillus_#_vaginalis_!_ATCC_{_49540_}_genomic_scaffold_SCAFFOLD8_whole_genome_shotgun_sequence|gi|251833062|ref|NZ_GG693419.1|	1.949	98.051	100	5030	5130
Leuconostoc_#_mesenteroides_!_subsp._{_cremoris_}_ATCC_19254_genomic_scaffold_SCAFFOLD11_whole_genome_shotgun_sequence|gi|251833036|ref|NZ_GG693393.1|	1.872	98.128	100	5242	5342
Listeria_#_grayi_!_DSM_{_20601_}_genomic_scaffold_SCAFFOLD2_whole_genome_shotgun_sequence|gi|311744851|ref|NZ_GL538353.1|	0.01	99.99	100	982117	982217
Lysinibacillus_#_sphaericus_!_OT4b.31_{_genomic_}_scaffold_Ls31_scaffold20_whole_genome_shotgun_sequence|gi|499133360|ref|NZ_KB933417.1|	5.942	94.058	100	1583	1683
Oceanobacillus_#_sp._!_Ndiop_{_Ndiop_}_genomic_scaffold_scaffold00009_whole_genome_shotgun_sequence|gi|403047912|ref|NZ_HE610984.1|	3.415	96.585	100	2828	2928
Paenisporosarcina_#_sp._!_HGH0030_{_genomic_}_scaffold_acAqH-supercont1.1_whole_genome_shotgun_sequence|gi|512487237|ref|NZ_KE150421.1|	0.004	99.996	100	2535704	2535804
Paenisporosarcina_#_sp._!_HGH0030_{_genomic_}_scaffold_acAqH-supercont1.4_whole_genome_shotgun_sequence|gi|512487512|ref|NZ_KE150424.1|	0.075	99.925	100	132546	132646
Pediococcus_#_acidilactici_!_7_4_{_genomic_}_scaffold_supercont1.8_whole_genome_shotgun_sequence|gi|270291658|ref|NZ_GG730090.1|	1.769	98.231	100	5553	5653
Pediococcus_#_acidilactici_!_DSM_{_20284_}_genomic_scaffold_SCAFFOLD1_whole_genome_shotgun_sequence|gi|305431452|ref|NZ_GL397067.1|	0.005	99.995	100	1937522	1937622
Ruminococcus_#_torques_!_ATCC_{_27756_}_Scfld0210_genomic_scaffold_whole_genome_shotgun_sequence|gi|211596899|ref|NZ_DS264353.1|	2.854	97.146	100	3404	3504
Ruminococcus_#_torques_!_ATCC_{_27756_}_Scfld0213_genomic_scaffold_whole_genome_shotgun_sequence|gi|211596902|ref|NZ_DS264356.1|	0.04	99.96	100	250926	251026
Ruminococcus_#_torques_!_ATCC_{_27756_}_Scfld022_genomic_scaffold_whole_genome_shotgun_sequence|gi|211596891|ref|NZ_DS264345.1|	0.014	99.986	100	709981	710081
Ruminococcus_#_torques_!_ATCC_{_27756_}_Scfld0235_genomic_scaffold_whole_genome_shotgun_sequence|gi|211596924|ref|NZ_DS264378.1|	0.851	99.149	100	11645	11745
Ruminococcus_#_torques_!_ATCC_{_27756_}_Scfld023_genomic_scaffold_whole_genome_shotgun_sequence|gi|211596892|ref|NZ_DS264346.1|	0.08	99.92	100	125195	125295
Ruminococcus_#_torques_!_ATCC_{_27756_}_Scfld024_genomic_scaffold_whole_genome_shotgun_sequence|gi|211596893|ref|NZ_DS264347.1|	0.122	99.878	100	81654	81754
Ruminococcus_#_torques_!_ATCC_{_27756_}_Scfld025_genomic_scaffold_whole_genome_shotgun_sequence|gi|211596894|ref|NZ_DS264348.1|	2.375	97.625	100	4110	4210
Ruminococcus_#_torques_!_ATCC_{_27756_}_Scfld029_genomic_scaffold_whole_genome_shotgun_sequence|gi|211596898|ref|NZ_DS264352.1|	1.001	98.999	100	9890	9990
Staphylococcus_#_aureus_!_B40723_{_genomic_}_scaffold_acqwm-supercont1.1_whole_genome_shotgun_sequence|gi|486325135|ref|NZ_KB822325.1|	0.022	99.978	100	444922	445022
Staphylococcus_#_aureus_!_B40723_{_genomic_}_scaffold_acqwm-supercont1.4_whole_genome_shotgun_sequence|gi|486326621|ref|NZ_KB822330.1|	6.109	93.891	100	1537	1637
Staphylococcus_#_aureus_!_B40723_{_genomic_}_scaffold_acqwm-supercont1.5_whole_genome_shotgun_sequence|gi|486326795|ref|NZ_KB822331.1|	6.983	93.017	100	1332	1432
Staphylococcus_#_aureus_!_B40723_{_genomic_}_scaffold_acqwm-supercont1.6_whole_genome_shotgun_sequence|gi|486327015|ref|NZ_KB822332.1|	0.237	99.763	100	42152	42252
Staphylococcus_#_aureus_!_B40950_{_genomic_}_scaffold_acqwJ-supercont1.3_whole_genome_shotgun_sequence|gi|486329748|ref|NZ_KB822338.1|	0.154	99.846	100	64866	64966
Staphylococcus_#_aureus_!_B53639_{_genomic_}_scaffold_acqwD-supercont1.1_whole_genome_shotgun_sequence|gi|486322000|ref|NZ_KB822341.1|	0.02	99.98	100	494181	494281
Staphylococcus_#_aureus_!_B53639_{_genomic_}_scaffold_acqwD-supercont1.2_whole_genome_shotgun_sequence|gi|486322130|ref|NZ_KB822342.1|	6.447	93.553	100	1451	1551
Staphylococcus_#_aureus_!_B53639_{_genomic_}_scaffold_acqwD-supercont1.3_whole_genome_shotgun_sequence|gi|486322313|ref|NZ_KB822343.1|	6.064	93.936	100	1549	1649
Staphylococcus_#_aureus_!_M0001_{_genomic_}_scaffold_acrHn-supercont1.17_whole_genome_shotgun_sequence|gi|486219060|ref|NZ_KB820935.1|	0.044	99.956	100	225857	225957
Staphylococcus_#_aureus_!_M0001_{_genomic_}_scaffold_acrHn-supercont1.18_whole_genome_shotgun_sequence|gi|486219440|ref|NZ_KB820936.1|	0.086	99.914	100	115594	115694
Staphylococcus_#_aureus_!_M0001_{_genomic_}_scaffold_acrHn-supercont1.23_whole_genome_shotgun_sequence|gi|486222014|ref|NZ_KB820942.1|	6.901	93.099	100	1349	1449
Staphylococcus_#_aureus_!_M0006_{_genomic_}_scaffold_aculO-supercont1.4_whole_genome_shotgun_sequence|gi|487254862|ref|NZ_KB820956.1|	1.234	98.766	100	8003	8103
Staphylococcus_#_aureus_!_M0006_{_genomic_}_scaffold_aculO-supercont1.5_whole_genome_shotgun_sequence|gi|487254889|ref|NZ_KB820957.1|	0.199	99.801	100	50033	50133
Staphylococcus_#_aureus_!_M0006_{_genomic_}_scaffold_aculO-supercont1.7_whole_genome_shotgun_sequence|gi|487262503|ref|NZ_KB820959.1|	0.044	99.956	100	225172	225272
Staphylococcus_#_aureus_!_M0060_{_genomic_}_scaffold_acrGU-supercont1.10_whole_genome_shotgun_sequence|gi|487319516|ref|NZ_KB820982.1|	0.072	99.928	100	139498	139598
Staphylococcus_#_aureus_!_M0060_{_genomic_}_scaffold_acrGU-supercont1.6_whole_genome_shotgun_sequence|gi|487340649|ref|NZ_KB820989.1|	0.034	99.966	100	293365	293465
Staphylococcus_#_aureus_!_M0060_{_genomic_}_scaffold_acrGU-supercont1.9_whole_genome_shotgun_sequence|gi|487349305|ref|NZ_KB820992.1|	6.892	93.108	100	1351	1451
Staphylococcus_#_aureus_!_M0077_{_genomic_}_scaffold_acunP-supercont1.1_whole_genome_shotgun_sequence|gi|487349956|ref|NZ_KB820999.1|	0.009	99.991	100	1118555	1118655
Staphylococcus_#_aureus_!_M0102_{_genomic_}_scaffold_acqwC-supercont1.2_whole_genome_shotgun_sequence|gi|486239442|ref|NZ_KB821007.1|	0.186	99.814	100	53579	53679
Staphylococcus_#_aureus_!_M0102_{_genomic_}_scaffold_acqwC-supercont1.3_whole_genome_shotgun_sequence|gi|486239628|ref|NZ_KB821008.1|	0.236	99.764	100	42209	42309
Staphylococcus_#_aureus_!_M0103_{_genomic_}_scaffold_acqxd-supercont1.7_whole_genome_shotgun_sequence|gi|486247420|ref|NZ_KB821020.1|	0.155	99.845	100	64342	64442
Staphylococcus_#_aureus_!_M0103_{_genomic_}_scaffold_acqxd-supercont1.8_whole_genome_shotgun_sequence|gi|486247857|ref|NZ_KB821021.1|	0.086	99.914	100	116612	116712
Staphylococcus_#_aureus_!_M0104_{_genomic_}_scaffold_acrHp-supercont1.5_whole_genome_shotgun_sequence|gi|487372555|ref|NZ_KB821028.1|	4.097	95.903	100	2341	2441
Staphylococcus_#_aureus_!_M0154_{_genomic_}_scaffold_acumB-supercont1.2_whole_genome_shotgun_sequence|gi|487359548|ref|NZ_KB821046.1|	0.022	99.978	100	444740	444840
Staphylococcus_#_aureus_!_M0154_{_genomic_}_scaffold_acumB-supercont1.6_whole_genome_shotgun_sequence|gi|487359676|ref|NZ_KB821050.1|	5.47	94.53	100	1728	1828
Staphylococcus_#_aureus_!_M0171_{_genomic_}_scaffold_acqwu-supercont1.6_whole_genome_shotgun_sequence|gi|487372994|ref|NZ_KB821066.1|	6.892	93.108	100	1351	1451
Staphylococcus_#_aureus_!_M0200_{_genomic_}_scaffold_acumC-supercont1.12_whole_genome_shotgun_sequence|gi|487360390|ref|NZ_KB821095.1|	0.009	99.991	100	1077123	1077223
Staphylococcus_#_aureus_!_M0200_{_genomic_}_scaffold_acumC-supercont1.3_whole_genome_shotgun_sequence|gi|487360457|ref|NZ_KB821098.1|	5.821	94.179	100	1618	1718
Staphylococcus_#_aureus_!_M0200_{_genomic_}_scaffold_acumC-supercont1.8_whole_genome_shotgun_sequence|gi|487360634|ref|NZ_KB821103.1|	0.081	99.919	100	122611	122711
Staphylococcus_#_aureus_!_M0240_{_genomic_}_scaffold_acqwO-supercont1.8_whole_genome_shotgun_sequence|gi|487374573|ref|NZ_KB821152.1|	0.059	99.941	100	170624	170724
Staphylococcus_#_aureus_!_M0288_{_genomic_}_scaffold_acqwg-supercont1.4_whole_genome_shotgun_sequence|gi|487376416|ref|NZ_KB821193.1|	0.034	99.966	100	290715	290815
Staphylococcus_#_aureus_!_M0288_{_genomic_}_scaffold_acqwg-supercont1.5_whole_genome_shotgun_sequence|gi|487376435|ref|NZ_KB821194.1|	6.892	93.108	100	1351	1451
Staphylococcus_#_aureus_!_M0294_{_genomic_}_scaffold_acumG-supercont1.3_whole_genome_shotgun_sequence|gi|487400069|ref|NZ_KB822355.1|	5.974	94.026	100	1574	1674
Staphylococcus_#_aureus_!_M0294_{_genomic_}_scaffold_acumG-supercont1.4_whole_genome_shotgun_sequence|gi|487400083|ref|NZ_KB822356.1|	6.068	93.932	100	1548	1648
Staphylococcus_#_aureus_!_M0326_{_genomic_}_scaffold_acrHf-supercont1.1_whole_genome_shotgun_sequence|gi|486266869|ref|NZ_KB821200.1|	1.331	98.669	100	7411	7511
Staphylococcus_#_aureus_!_M0326_{_genomic_}_scaffold_acrHf-supercont1.6_whole_genome_shotgun_sequence|gi|486269430|ref|NZ_KB821207.1|	6.892	93.108	100	1351	1451
Staphylococcus_#_aureus_!_M0329_{_genomic_}_scaffold_acrHa-supercont1.1_whole_genome_shotgun_sequence|gi|486273423|ref|NZ_KB821224.1|	0.032	99.968	100	316022	316122
Staphylococcus_#_aureus_!_M0330_{_genomic_}_scaffold_acqxt-supercont1.3_whole_genome_shotgun_sequence|gi|486278871|ref|NZ_KB821222.1|	0.058	99.942	100	172619	172719
Staphylococcus_#_aureus_!_M0334_{_genomic_}_scaffold_acumz-supercont1.1_whole_genome_shotgun_sequence|gi|487363432|ref|NZ_KB821234.1|	0.007	99.993	100	1383157	1383257
Staphylococcus_#_aureus_!_M0334_{_genomic_}_scaffold_acumz-supercont1.5_whole_genome_shotgun_sequence|gi|487363731|ref|NZ_KB821238.1|	6.959	93.041	100	1337	1437
Staphylococcus_#_aureus_!_M0350_{_genomic_}_scaffold_acunH-supercont1.3_whole_genome_shotgun_sequence|gi|487364094|ref|NZ_KB821252.1|	6.882	93.118	100	1353	1453
Staphylococcus_#_aureus_!_M0351_{_genomic_}_scaffold_acunV-supercont1.5_whole_genome_shotgun_sequence|gi|487364385|ref|NZ_KB821259.1|	5.47	94.53	100	1728	1828
Staphylococcus_#_aureus_!_M0351_{_genomic_}_scaffold_acunV-supercont1.6_whole_genome_shotgun_sequence|gi|487364394|ref|NZ_KB821260.1|	4.782	95.218	100	1991	2091
Staphylococcus_#_aureus_!_M0364_{_genomic_}_scaffold_acqwM-supercont1.2_whole_genome_shotgun_sequence|gi|486286049|ref|NZ_KB821265.1|	0.022	99.978	100	451830	451930
Staphylococcus_#_aureus_!_M0375_{_genomic_}_scaffold_acunY-supercont1.10_whole_genome_shotgun_sequence|gi|487365741|ref|NZ_KB821283.1|	6.878	93.122	100	1354	1454
Staphylococcus_#_aureus_!_M0391_{_genomic_}_scaffold_acqwG-supercont1.2_whole_genome_shotgun_sequence|gi|486290205|ref|NZ_KB821310.1|	0.081	99.919	100	123410	123510
Staphylococcus_#_aureus_!_M0391_{_genomic_}_scaffold_acqwG-supercont1.5_whole_genome_shotgun_sequence|gi|486290789|ref|NZ_KB821313.1|	4.902	95.098	100	1940	2040
Staphylococcus_#_aureus_!_M0404_{_genomic_}_scaffold_acrGQ-supercont1.3_whole_genome_shotgun_sequence|gi|487378650|ref|NZ_KB821304.1|	0.225	99.775	100	44428	44528
Staphylococcus_#_aureus_!_M0415_{_genomic_}_scaffold_acrGP-supercont1.3_whole_genome_shotgun_sequence|gi|487379193|ref|NZ_KB821319.1|	1.241	98.759	100	7956	8056
Staphylococcus_#_aureus_!_M0450_{_genomic_}_scaffold_acqwq-supercont1.1_whole_genome_shotgun_sequence|gi|486301510|ref|NZ_KB821343.1|	0.021	99.979	100	487199	487299
Staphylococcus_#_aureus_!_M0478_{_genomic_}_scaffold_acrGZ-supercont1.2_whole_genome_shotgun_sequence|gi|486311482|ref|NZ_KB821377.1|	0.023	99.977	100	427524	427624
Staphylococcus_#_aureus_!_M0478_{_genomic_}_scaffold_acrGZ-supercont1.3_whole_genome_shotgun_sequence|gi|486311605|ref|NZ_KB821378.1|	2.933	97.067	100	3309	3409
Staphylococcus_#_aureus_!_M0478_{_genomic_}_scaffold_acrGZ-supercont1.7_whole_genome_shotgun_sequence|gi|486313431|ref|NZ_KB821382.1|	0.013	99.987	100	782463	782563
Staphylococcus_#_aureus_!_M0489_{_genomic_}_scaffold_acsPG-supercont1.11_whole_genome_shotgun_sequence|gi|486314901|ref|NZ_KB821387.1|	0.014	99.986	100	729594	729694
Staphylococcus_#_aureus_!_M0489_{_genomic_}_scaffold_acsPG-supercont1.4_whole_genome_shotgun_sequence|gi|486316648|ref|NZ_KB821395.1|	0.047	99.953	100	211850	211950
Staphylococcus_#_aureus_!_M0528_{_genomic_}_scaffold_acvqo-supercont1.2_whole_genome_shotgun_sequence|gi|486337440|ref|NZ_KB821423.1|	0.058	99.942	100	172081	172181
Staphylococcus_#_aureus_!_M0536_{_genomic_}_scaffold_acvqu-supercont1.2_whole_genome_shotgun_sequence|gi|486344343|ref|NZ_KB821467.1|	0.052	99.948	100	190826	190926
Staphylococcus_#_aureus_!_M0539_{_genomic_}_scaffold_acvqn-supercont1.13_whole_genome_shotgun_sequence|gi|486347969|ref|NZ_KB821454.1|	6.892	93.108	100	1351	1451
Staphylococcus_#_aureus_!_M0539_{_genomic_}_scaffold_acvqn-supercont1.1_whole_genome_shotgun_sequence|gi|486346615|ref|NZ_KB821450.1|	0.009	99.991	100	1088844	1088944
Staphylococcus_#_aureus_!_M0547_{_genomic_}_scaffold_acvqJ-supercont1.6_whole_genome_shotgun_sequence|gi|486352404|ref|NZ_KB821447.1|	0.034	99.966	100	291341	291441
Staphylococcus_#_aureus_!_M0565_{_genomic_}_scaffold_acvqE-supercont1.5_whole_genome_shotgun_sequence|gi|486354656|ref|NZ_KB821483.1|	0.459	99.541	100	21692	21792
Staphylococcus_#_aureus_!_M0602_{_genomic_}_scaffold_acvqp-supercont1.6_whole_genome_shotgun_sequence|gi|486359872|ref|NZ_KB821498.1|	0.057	99.943	100	174320	174420
Staphylococcus_#_aureus_!_M0648_{_genomic_}_scaffold_acunl-supercont1.10_whole_genome_shotgun_sequence|gi|487380973|ref|NZ_KB821520.1|	6.892	93.108	100	1351	1451
Staphylococcus_#_aureus_!_M0648_{_genomic_}_scaffold_acunl-supercont1.9_whole_genome_shotgun_sequence|gi|487381266|ref|NZ_KB821530.1|	0.158	99.842	100	63320	63420
Staphylococcus_#_aureus_!_M0660_{_genomic_}_scaffold_acumg-supercont1.12_whole_genome_shotgun_sequence|gi|487381412|ref|NZ_KB821534.1|	6.892	93.108	100	1351	1451
Staphylococcus_#_aureus_!_M0660_{_genomic_}_scaffold_acumg-supercont1.13_whole_genome_shotgun_sequence|gi|487381429|ref|NZ_KB821535.1|	0.043	99.957	100	233659	233759
Staphylococcus_#_aureus_!_M0660_{_genomic_}_scaffold_acumg-supercont1.6_whole_genome_shotgun_sequence|gi|487381544|ref|NZ_KB821542.1|	1.284	98.716	100	7690	7790
Staphylococcus_#_aureus_!_M0663_{_genomic_}_scaffold_acuoc-supercont1.11_whole_genome_shotgun_sequence|gi|487381787|ref|NZ_KB821548.1|	0.101	99.899	100	98733	98833
Staphylococcus_#_aureus_!_M0663_{_genomic_}_scaffold_acuoc-supercont1.12_whole_genome_shotgun_sequence|gi|487381811|ref|NZ_KB821549.1|	6.892	93.108	100	1351	1451
Staphylococcus_#_aureus_!_M0663_{_genomic_}_scaffold_acuoc-supercont1.1_whole_genome_shotgun_sequence|gi|487381746|ref|NZ_KB821546.1|	0.022	99.978	100	447707	447807
Staphylococcus_#_aureus_!_M0663_{_genomic_}_scaffold_acuoc-supercont1.8_whole_genome_shotgun_sequence|gi|487382205|ref|NZ_KB821559.1|	0.181	99.819	100	55173	55273
Staphylococcus_#_aureus_!_M0673_{_genomic_}_scaffold_acumv-supercont1.6_whole_genome_shotgun_sequence|gi|487382584|ref|NZ_KB821567.1|	0.475	99.525	100	20969	21069
Staphylococcus_#_aureus_!_M0673_{_genomic_}_scaffold_acumv-supercont1.8_whole_genome_shotgun_sequence|gi|487382665|ref|NZ_KB821569.1|	0.533	99.467	100	18668	18768
Staphylococcus_#_aureus_!_M0687_{_genomic_}_scaffold_acvqC-supercont1.4_whole_genome_shotgun_sequence|gi|486365927|ref|NZ_KB821580.1|	0.039	99.961	100	254478	254578
Staphylococcus_#_aureus_!_M0687_{_genomic_}_scaffold_acvqC-supercont1.7_whole_genome_shotgun_sequence|gi|486367155|ref|NZ_KB821583.1|	0.097	99.903	100	103484	103584
Staphylococcus_#_aureus_!_M0692_{_genomic_}_scaffold_acvqM-supercont1.5_whole_genome_shotgun_sequence|gi|486369210|ref|NZ_KB821591.1|	5.165	94.835	100	1836	1936
Staphylococcus_#_aureus_!_M0692_{_genomic_}_scaffold_acvqM-supercont1.7_whole_genome_shotgun_sequence|gi|486369427|ref|NZ_KB821593.1|	0.042	99.958	100	235880	235980
Staphylococcus_#_aureus_!_M0695_{_genomic_}_scaffold_acunx-supercont1.13_whole_genome_shotgun_sequence|gi|489044944|ref|NZ_KB821600.1|	3.029	96.971	100	3201	3301
Staphylococcus_#_aureus_!_M0695_{_genomic_}_scaffold_acunx-supercont1.14_whole_genome_shotgun_sequence|gi|489044950|ref|NZ_KB821601.1|	1.927	98.073	100	5090	5190
Staphylococcus_#_aureus_!_M0695_{_genomic_}_scaffold_acunx-supercont1.6_whole_genome_shotgun_sequence|gi|489045041|ref|NZ_KB821611.1|	4.85	95.15	100	1962	2062
Staphylococcus_#_aureus_!_M0719_{_genomic_}_scaffold_acvrc-supercont1.3_whole_genome_shotgun_sequence|gi|480444771|ref|NZ_KB821618.1|	0.037	99.963	100	268196	268296
Staphylococcus_#_aureus_!_M0769_{_genomic_}_scaffold_acvqF-supercont1.6_whole_genome_shotgun_sequence|gi|480448214|ref|NZ_KB821634.1|	0.039	99.961	100	256084	256184
Staphylococcus_#_aureus_!_M0770_{_genomic_}_scaffold_acvra-supercont1.5_whole_genome_shotgun_sequence|gi|480452958|ref|NZ_KB821645.1|	1.027	98.973	100	9634	9734
Staphylococcus_#_aureus_!_M0780_{_genomic_}_scaffold_acvqm-supercont1.1_whole_genome_shotgun_sequence|gi|486375353|ref|NZ_KB821662.1|	0.02	99.98	100	499317	499417
Staphylococcus_#_aureus_!_M0780_{_genomic_}_scaffold_acvqm-supercont1.5_whole_genome_shotgun_sequence|gi|486376414|ref|NZ_KB821666.1|	0.464	99.536	100	21450	21550
Staphylococcus_#_aureus_!_M0799_{_genomic_}_scaffold_acvqq-supercont1.3_whole_genome_shotgun_sequence|gi|486379082|ref|NZ_KB821655.1|	0.045	99.955	100	219797	219897
Staphylococcus_#_aureus_!_M0799_{_genomic_}_scaffold_acvqq-supercont1.9_whole_genome_shotgun_sequence|gi|486380606|ref|NZ_KB821661.1|	6.892	93.108	100	1351	1451
Staphylococcus_#_aureus_!_M0822_{_genomic_}_scaffold_acunB-supercont1.4_whole_genome_shotgun_sequence|gi|487383672|ref|NZ_KB821683.1|	0.043	99.957	100	233632	233732
Staphylococcus_#_aureus_!_M0823_{_genomic_}_scaffold_acvqk-supercont1.2_whole_genome_shotgun_sequence|gi|486381874|ref|NZ_KB821692.1|	0.02	99.98	100	493641	493741
Staphylococcus_#_aureus_!_M0823_{_genomic_}_scaffold_acvqk-supercont1.4_whole_genome_shotgun_sequence|gi|486382346|ref|NZ_KB821694.1|	5.144	94.856	100	1844	1944
Staphylococcus_#_aureus_!_M0844_{_genomic_}_scaffold_acvqL-supercont1.3_whole_genome_shotgun_sequence|gi|486386320|ref|NZ_KB821712.1|	0.025	99.975	100	400420	400520
Staphylococcus_#_aureus_!_M0892_{_genomic_}_scaffold_aculW-supercont1.2_whole_genome_shotgun_sequence|gi|487385563|ref|NZ_KB821731.1|	0.02	99.98	100	496846	496946
Staphylococcus_#_aureus_!_M0892_{_genomic_}_scaffold_aculW-supercont1.4_whole_genome_shotgun_sequence|gi|487385723|ref|NZ_KB821733.1|	0.025	99.975	100	405282	405382
Staphylococcus_#_aureus_!_M0900_{_genomic_}_scaffold_acunz-supercont1.2_whole_genome_shotgun_sequence|gi|487386116|ref|NZ_KB821740.1|	0.026	99.974	100	382948	383048
Staphylococcus_#_aureus_!_M0900_{_genomic_}_scaffold_acunz-supercont1.3_whole_genome_shotgun_sequence|gi|487386150|ref|NZ_KB821741.1|	9.05	90.95	100	1005	1105
Staphylococcus_#_aureus_!_M0927_{_genomic_}_scaffold_aculU-supercont1.1_whole_genome_shotgun_sequence|gi|487386873|ref|NZ_KB821748.1|	0.022	99.978	100	454274	454374
Staphylococcus_#_aureus_!_M0927_{_genomic_}_scaffold_aculU-supercont1.6_whole_genome_shotgun_sequence|gi|487387505|ref|NZ_KB821756.1|	0.457	99.543	100	21792	21892
Staphylococcus_#_aureus_!_M0927_{_genomic_}_scaffold_aculU-supercont1.8_whole_genome_shotgun_sequence|gi|487387567|ref|NZ_KB821758.1|	0.459	99.541	100	21707	21807
Staphylococcus_#_aureus_!_M0943_{_genomic_}_scaffold_acvqw-supercont1.1_whole_genome_shotgun_sequence|gi|486389966|ref|NZ_KB821765.1|	0.022	99.978	100	452599	452699
Staphylococcus_#_aureus_!_M0944_{_genomic_}_scaffold_acvqy-supercont1.2_whole_genome_shotgun_sequence|gi|486394381|ref|NZ_KB821780.1|	0.043	99.957	100	232018	232118
Staphylococcus_#_aureus_!_M0964_{_genomic_}_scaffold_aculV-supercont1.7_whole_genome_shotgun_sequence|gi|487389758|ref|NZ_KB821807.1|	0.016	99.984	100	617454	617554
Staphylococcus_#_aureus_!_M0978_{_genomic_}_scaffold_acunG-supercont1.4_whole_genome_shotgun_sequence|gi|487390037|ref|NZ_KB821774.1|	0.334	99.666	100	29868	29968
Staphylococcus_#_aureus_!_M0978_{_genomic_}_scaffold_acunG-supercont1.5_whole_genome_shotgun_sequence|gi|487390075|ref|NZ_KB821775.1|	7.955	92.045	100	1157	1257
Staphylococcus_#_aureus_!_M0998_{_genomic_}_scaffold_acvqv-supercont1.2_whole_genome_shotgun_sequence|gi|486398136|ref|NZ_KB821814.1|	0.396	99.604	100	25145	25245
Staphylococcus_#_aureus_!_M0998_{_genomic_}_scaffold_acvqv-supercont1.3_whole_genome_shotgun_sequence|gi|486398218|ref|NZ_KB821815.1|	0.06	99.94	100	166273	166373
Staphylococcus_#_aureus_!_M0999_{_genomic_}_scaffold_acvqG-supercont1.1_whole_genome_shotgun_sequence|gi|486398983|ref|NZ_KB821820.1|	0.022	99.978	100	450495	450595
Staphylococcus_#_aureus_!_M1010_{_genomic_}_scaffold_acvqt-supercont1.3_whole_genome_shotgun_sequence|gi|486402926|ref|NZ_KB821826.1|	0.034	99.966	100	290508	290608
Staphylococcus_#_aureus_!_M1034_{_genomic_}_scaffold_acumn-supercont1.12_whole_genome_shotgun_sequence|gi|487391302|ref|NZ_KB821851.1|	5.192	94.808	100	1826	1926
Staphylococcus_#_aureus_!_M1034_{_genomic_}_scaffold_acumn-supercont1.5_whole_genome_shotgun_sequence|gi|487391488|ref|NZ_KB821856.1|	9.452	90.548	100	958	1058
Staphylococcus_#_aureus_!_M1036_{_genomic_}_scaffold_acvqI-supercont1.3_whole_genome_shotgun_sequence|gi|486407745|ref|NZ_KB821864.1|	0.018	99.982	100	550619	550719
Staphylococcus_#_aureus_!_M1036_{_genomic_}_scaffold_acvqI-supercont1.5_whole_genome_shotgun_sequence|gi|486408406|ref|NZ_KB821866.1|	0.06	99.94	100	165624	165724
Staphylococcus_#_aureus_!_M1036_{_genomic_}_scaffold_acvqI-supercont1.7_whole_genome_shotgun_sequence|gi|486408866|ref|NZ_KB821868.1|	0.059	99.941	100	170210	170310
Staphylococcus_#_aureus_!_M1037_{_genomic_}_scaffold_acvqz-supercont1.5_whole_genome_shotgun_sequence|gi|486410955|ref|NZ_KB821924.1|	0.491	99.509	100	20256	20356
Staphylococcus_#_aureus_!_M1044_{_genomic_}_scaffold_acumE-supercont1.15_whole_genome_shotgun_sequence|gi|487392255|ref|NZ_KB821877.1|	2.425	97.575	100	4024	4124
Staphylococcus_#_aureus_!_M1044_{_genomic_}_scaffold_acumE-supercont1.3_whole_genome_shotgun_sequence|gi|487392496|ref|NZ_KB821883.1|	0.231	99.769	100	43147	43247
Staphylococcus_#_aureus_!_M1060_{_genomic_}_scaffold_acunt-supercont1.2_whole_genome_shotgun_sequence|gi|487400630|ref|NZ_KB822369.1|	0.019	99.981	100	518436	518536
Staphylococcus_#_aureus_!_M1061_{_genomic_}_scaffold_aculN-supercont1.6_whole_genome_shotgun_sequence|gi|487393595|ref|NZ_KB821897.1|	5.851	94.149	100	1609	1709
Staphylococcus_#_aureus_!_M1062_{_genomic_}_scaffold_aculY-supercont1.5_whole_genome_shotgun_sequence|gi|487394178|ref|NZ_KB821916.1|	0.457	99.543	100	21792	21892
Staphylococcus_#_aureus_!_M1062_{_genomic_}_scaffold_aculY-supercont1.6_whole_genome_shotgun_sequence|gi|487394190|ref|NZ_KB821917.1|	0.524	99.476	100	19001	19101
Staphylococcus_#_aureus_!_M1063_{_genomic_}_scaffold_acumZ-supercont1.5_whole_genome_shotgun_sequence|gi|486416366|ref|NZ_KB821907.1|	2.383	97.617	100	4096	4196
Staphylococcus_#_aureus_!_M1064_{_genomic_}_scaffold_acumU-supercont1.2_whole_genome_shotgun_sequence|gi|486419606|ref|NZ_KB821938.1|	4.297	95.703	100	2227	2327
Staphylococcus_#_aureus_!_M1076_{_genomic_}_scaffold_acumq-supercont1.2_whole_genome_shotgun_sequence|gi|486417684|ref|NZ_KB821952.1|	0.074	99.926	100	135234	135334
Staphylococcus_#_aureus_!_M1103_{_genomic_}_scaffold_acump-supercont1.2_whole_genome_shotgun_sequence|gi|486428600|ref|NZ_KB822035.1|	6.274	93.726	100	1494	1594
Staphylococcus_#_aureus_!_M1103_{_genomic_}_scaffold_acump-supercont1.3_whole_genome_shotgun_sequence|gi|486428651|ref|NZ_KB822036.1|	6.394	93.606	100	1464	1564
Staphylococcus_#_aureus_!_M1109_{_genomic_}_scaffold_acunD-supercont1.11_whole_genome_shotgun_sequence|gi|487395199|ref|NZ_KB822009.1|	0.056	99.944	100	177928	178028
Staphylococcus_#_aureus_!_M1109_{_genomic_}_scaffold_acunD-supercont1.4_whole_genome_shotgun_sequence|gi|487395351|ref|NZ_KB822015.1|	5.345	94.655	100	1771	1871
Staphylococcus_#_aureus_!_M1119_{_genomic_}_scaffold_acunS-supercont1.10_whole_genome_shotgun_sequence|gi|486430316|ref|NZ_KB822022.1|	0.297	99.703	100	33586	33686
Staphylococcus_#_aureus_!_M1119_{_genomic_}_scaffold_acunS-supercont1.7_whole_genome_shotgun_sequence|gi|486431273|ref|NZ_KB822031.1|	0.165	99.835	100	60502	60602
Staphylococcus_#_aureus_!_M1126_{_genomic_}_scaffold_acumd-supercont1.11_whole_genome_shotgun_sequence|gi|487395824|ref|NZ_KB821993.1|	8.496	91.504	100	1077	1177
Staphylococcus_#_aureus_!_M1126_{_genomic_}_scaffold_acumd-supercont1.6_whole_genome_shotgun_sequence|gi|487395951|ref|NZ_KB822003.1|	0.039	99.961	100	255781	255881
Staphylococcus_#_aureus_!_M1167_{_genomic_}_scaffold_acuns-supercont1.4_whole_genome_shotgun_sequence|gi|486432251|ref|NZ_KB822045.1|	0.039	99.961	100	255844	255944
Staphylococcus_#_aureus_!_M1167_{_genomic_}_scaffold_acuns-supercont1.5_whole_genome_shotgun_sequence|gi|486432337|ref|NZ_KB822046.1|	0.093	99.907	100	107982	108082
Staphylococcus_#_aureus_!_M1167_{_genomic_}_scaffold_acuns-supercont1.6_whole_genome_shotgun_sequence|gi|486432357|ref|NZ_KB822047.1|	0.476	99.524	100	20906	21006
Staphylococcus_#_aureus_!_M1167_{_genomic_}_scaffold_acuns-supercont1.7_whole_genome_shotgun_sequence|gi|486432394|ref|NZ_KB822048.1|	0.41	99.59	100	24265	24365
Staphylococcus_#_aureus_!_M1198_{_genomic_}_scaffold_acumf-supercont1.2_whole_genome_shotgun_sequence|gi|486435663|ref|NZ_KB822052.1|	0.707	99.293	100	14051	14151
Staphylococcus_#_aureus_!_M1224_{_genomic_}_scaffold_acumM-supercont1.1_whole_genome_shotgun_sequence|gi|487396563|ref|NZ_KB822076.1|	0.022	99.978	100	447698	447798
Staphylococcus_#_aureus_!_M1224_{_genomic_}_scaffold_acumM-supercont1.4_whole_genome_shotgun_sequence|gi|487396660|ref|NZ_KB822080.1|	0.042	99.958	100	239795	239895
Staphylococcus_#_aureus_!_M1224_{_genomic_}_scaffold_acumM-supercont1.7_whole_genome_shotgun_sequence|gi|487396756|ref|NZ_KB822083.1|	2.603	97.397	100	3742	3842
Staphylococcus_#_aureus_!_M1244_{_genomic_}_scaffold_acumu-supercont1.10_whole_genome_shotgun_sequence|gi|487396892|ref|NZ_KB822087.1|	0.033	99.967	100	303751	303851
Staphylococcus_#_aureus_!_M1244_{_genomic_}_scaffold_acumu-supercont1.7_whole_genome_shotgun_sequence|gi|487397133|ref|NZ_KB822096.1|	0.075	99.925	100	132390	132490
Staphylococcus_#_aureus_!_M1248_{_genomic_}_scaffold_acunw-supercont1.1_whole_genome_shotgun_sequence|gi|486640138|ref|NZ_KB822099.1|	0.02	99.98	100	493823	493923
Staphylococcus_#_aureus_!_M1248_{_genomic_}_scaffold_acunw-supercont1.6_whole_genome_shotgun_sequence|gi|486651351|ref|NZ_KB822104.1|	0.717	99.283	100	13845	13945
Staphylococcus_#_aureus_!_M1255_{_genomic_}_scaffold_acunA-supercont1.2_whole_genome_shotgun_sequence|gi|486677808|ref|NZ_KB822117.1|	0.228	99.772	100	43795	43895
Staphylococcus_#_aureus_!_M1257_{_genomic_}_scaffold_acumo-supercont1.1_whole_genome_shotgun_sequence|gi|486708046|ref|NZ_KB822125.1|	0.022	99.978	100	449402	449502
Staphylococcus_#_aureus_!_M1286_{_genomic_}_scaffold_acuob-supercont1.1_whole_genome_shotgun_sequence|gi|487397870|ref|NZ_KB822141.1|	0.02	99.98	100	494864	494964
Staphylococcus_#_aureus_!_M1286_{_genomic_}_scaffold_acuob-supercont1.3_whole_genome_shotgun_sequence|gi|487398125|ref|NZ_KB822149.1|	0.044	99.956	100	228254	228354
Staphylococcus_#_aureus_!_M1286_{_genomic_}_scaffold_acuob-supercont1.7_whole_genome_shotgun_sequence|gi|487398238|ref|NZ_KB822153.1|	0.091	99.909	100	109930	110030
Staphylococcus_#_aureus_!_M1286_{_genomic_}_scaffold_acuob-supercont1.8_whole_genome_shotgun_sequence|gi|487398260|ref|NZ_KB822154.1|	1.21	98.79	100	8167	8267
Staphylococcus_#_aureus_!_M1291_{_genomic_}_scaffold_acumW-supercont1.2_whole_genome_shotgun_sequence|gi|486783170|ref|NZ_KB822167.1|	0.026	99.974	100	381563	381663
Staphylococcus_#_aureus_!_M1291_{_genomic_}_scaffold_acumW-supercont1.4_whole_genome_shotgun_sequence|gi|486791259|ref|NZ_KB822169.1|	0.043	99.957	100	230260	230360
Staphylococcus_#_aureus_!_M1291_{_genomic_}_scaffold_acumW-supercont1.9_whole_genome_shotgun_sequence|gi|486813127|ref|NZ_KB822174.1|	1.003	98.997	100	9875	9975
Staphylococcus_#_aureus_!_M1320_{_genomic_}_scaffold_acumx-supercont1.3_whole_genome_shotgun_sequence|gi|486874939|ref|NZ_KB822184.1|	0.071	99.929	100	141394	141494
Staphylococcus_#_aureus_!_M1321_{_genomic_}_scaffold_acunh-supercont1.3_whole_genome_shotgun_sequence|gi|486908664|ref|NZ_KB822193.1|	0.246	99.754	100	40535	40635
Staphylococcus_#_aureus_!_M1321_{_genomic_}_scaffold_acunh-supercont1.7_whole_genome_shotgun_sequence|gi|486929038|ref|NZ_KB822197.1|	0.145	99.855	100	68939	69039
Staphylococcus_#_aureus_!_M1321_{_genomic_}_scaffold_acunh-supercont1.9_whole_genome_shotgun_sequence|gi|486932732|ref|NZ_KB822199.1|	0.059	99.941	100	168113	168213
Staphylococcus_#_aureus_!_M1322_{_genomic_}_scaffold_acumT-supercont1.3_whole_genome_shotgun_sequence|gi|486965577|ref|NZ_KB822202.1|	2.874	97.126	100	3379	3479
Staphylococcus_#_aureus_!_M1373_{_genomic_}_scaffold_acumD-supercont1.3_whole_genome_shotgun_sequence|gi|487052184|ref|NZ_KB822212.1|	3.805	96.195	100	2528	2628
Staphylococcus_#_aureus_!_M1374_{_genomic_}_scaffold_acumR-supercont1.1_whole_genome_shotgun_sequence|gi|487398571|ref|NZ_KB822218.1|	0.022	99.978	100	450750	450850
Staphylococcus_#_aureus_!_M1374_{_genomic_}_scaffold_acumR-supercont1.4_whole_genome_shotgun_sequence|gi|487398652|ref|NZ_KB822222.1|	0.039	99.961	100	254597	254697
Staphylococcus_#_aureus_!_M1374_{_genomic_}_scaffold_acumR-supercont1.6_whole_genome_shotgun_sequence|gi|487398680|ref|NZ_KB822224.1|	0.476	99.524	100	20912	21012
Staphylococcus_#_aureus_!_M1394_{_genomic_}_scaffold_acuny-supercont1.2_whole_genome_shotgun_sequence|gi|487086993|ref|NZ_KB822229.1|	0.457	99.543	100	21792	21892
Staphylococcus_#_aureus_!_M1405_{_genomic_}_scaffold_acumh-supercont1.13_whole_genome_shotgun_sequence|gi|487398910|ref|NZ_KB822539.1|	8.496	91.504	100	1077	1177
Staphylococcus_#_aureus_!_M1405_{_genomic_}_scaffold_acumh-supercont1.5_whole_genome_shotgun_sequence|gi|487399089|ref|NZ_KB822545.1|	0.039	99.961	100	257773	257873
Staphylococcus_#_aureus_!_M1405_{_genomic_}_scaffold_acumh-supercont1.7_whole_genome_shotgun_sequence|gi|487399157|ref|NZ_KB822547.1|	0.013	99.987	100	786731	786831
Staphylococcus_#_aureus_!_M1450_{_genomic_}_scaffold_acumw-supercont1.5_whole_genome_shotgun_sequence|gi|487125072|ref|NZ_KB822236.1|	0.401	99.599	100	24815	24915
Staphylococcus_#_aureus_!_M1450_{_genomic_}_scaffold_acumw-supercont1.6_whole_genome_shotgun_sequence|gi|487132426|ref|NZ_KB822237.1|	0.485	99.515	100	20511	20611
Staphylococcus_#_aureus_!_M1451_{_genomic_}_scaffold_acunE-supercont1.2_whole_genome_shotgun_sequence|gi|480456990|ref|NZ_KB822242.1|	5.47	94.53	100	1728	1828
Staphylococcus_#_aureus_!_M1451_{_genomic_}_scaffold_acunE-supercont1.3_whole_genome_shotgun_sequence|gi|480457145|ref|NZ_KB822243.1|	5.015	94.985	100	1894	1994
Staphylococcus_#_aureus_!_M1463_{_genomic_}_scaffold_acums-supercont1.1_whole_genome_shotgun_sequence|gi|487135755|ref|NZ_KB822554.1|	0.036	99.964	100	278440	278540
Staphylococcus_#_aureus_!_M1463_{_genomic_}_scaffold_acums-supercont1.4_whole_genome_shotgun_sequence|gi|487136173|ref|NZ_KB822559.1|	0.043	99.957	100	232344	232444
Staphylococcus_#_aureus_!_M1463_{_genomic_}_scaffold_acums-supercont1.5_whole_genome_shotgun_sequence|gi|487136191|ref|NZ_KB822560.1|	0.388	99.612	100	25655	25755
Staphylococcus_#_aureus_!_M1463_{_genomic_}_scaffold_acums-supercont1.7_whole_genome_shotgun_sequence|gi|487136278|ref|NZ_KB822562.1|	0.493	99.507	100	20178	20278
Staphylococcus_#_aureus_!_M1466_{_genomic_}_scaffold_acumV-supercont1.10_whole_genome_shotgun_sequence|gi|487401667|ref|NZ_KB822383.1|	0.174	99.826	100	57334	57434
Staphylococcus_#_aureus_!_M1466_{_genomic_}_scaffold_acumV-supercont1.13_whole_genome_shotgun_sequence|gi|487401728|ref|NZ_KB822386.1|	0.016	99.984	100	630398	630498
Staphylococcus_#_aureus_!_M1466_{_genomic_}_scaffold_acumV-supercont1.8_whole_genome_shotgun_sequence|gi|487401916|ref|NZ_KB822400.1|	1.237	98.763	100	7983	8083
Staphylococcus_#_aureus_!_M1481_{_genomic_}_scaffold_aculQ-supercont1.9_whole_genome_shotgun_sequence|gi|487136856|ref|NZ_KB822256.1|	3.52	96.48	100	2741	2841
Staphylococcus_#_aureus_!_M1510_{_genomic_}_scaffold_aculM-supercont1.3_whole_genome_shotgun_sequence|gi|487399529|ref|NZ_KB822259.1|	0.043	99.957	100	233651	233751
Staphylococcus_#_aureus_!_M1533_{_genomic_}_scaffold_aculS-supercont1.3_whole_genome_shotgun_sequence|gi|487138274|ref|NZ_KB822287.1|	0.057	99.943	100	175007	175107
Staphylococcus_#_aureus_!_M1544_{_genomic_}_scaffold_acunm-supercont1.7_whole_genome_shotgun_sequence|gi|487139205|ref|NZ_KB822282.1|	0.468	99.532	100	21248	21348
Staphylococcus_#_aureus_!_M1544_{_genomic_}_scaffold_acunm-supercont1.9_whole_genome_shotgun_sequence|gi|487139325|ref|NZ_KB822284.1|	0.087	99.913	100	114845	114945
Staphylococcus_#_aureus_!_M1556_{_genomic_}_scaffold_acund-supercont1.4_whole_genome_shotgun_sequence|gi|487139757|ref|NZ_KB822295.1|	0.464	99.536	100	21466	21566
Staphylococcus_#_aureus_!_M1563_{_genomic_}_scaffold_acuoe-supercont1.4_whole_genome_shotgun_sequence|gi|487160870|ref|NZ_KB822307.1|	0.066	99.934	100	152089	152189
Staphylococcus_#_aureus_!_M1563_{_genomic_}_scaffold_acuoe-supercont1.6_whole_genome_shotgun_sequence|gi|487166501|ref|NZ_KB822309.1|	0.023	99.977	100	438485	438585
Staphylococcus_#_aureus_!_plasmid_{_SAP015A_}_complete_sequence|gi|410108933|ref|NC_013289.1|	0.369	99.631	100	26968	27068
Staphylococcus_#_aureus_!_plasmid_{_SAP027A_}_complete_sequence|gi|260667403|ref|NC_013324.1|	0.337	99.663	100	29546	29646
Staphylococcus_#_aureus_!_plasmid_{_SAP046A_}_complete_sequence|gi|410108938|ref|NC_013294.1|	0.369	99.631	100	26968	27068
Staphylococcus_#_aureus_!_plasmid_{_SAP049A_}_complete_sequence|gi|410108940|ref|NC_013296.1|	0.4	99.6	100	24922	25022
Staphylococcus_#_aureus_!_plasmid_{_SAP050A_}_complete_sequence|gi|410108942|ref|NC_013298.1|	0.369	99.631	100	26967	27067
Staphylococcus_#_aureus_!_plasmid_{_SAP051A_}_complete_sequence|gi|410108943|ref|NC_013299.1|	0.434	99.566	100	22959	23059
Staphylococcus_#_aureus_!_plasmid_{_p18805-P03_}_complete_sequence|gi|410655546|ref|NC_019150.1|	0.369	99.631	100	26969	27069
Staphylococcus_#_aureus_!_plasmid_{_p18806-P03_}_complete_sequence|gi|410655117|ref|NC_018956.1|	0.369	99.631	100	26968	27068
Staphylococcus_#_aureus_!_plasmid_{_p18807-P03_}_complete_sequence|gi|410655154|ref|NC_018957.1|	0.371	99.629	100	26872	26972
Staphylococcus_#_aureus_!_plasmid_{_p18808-P03_}_complete_sequence|gi|410655199|ref|NC_018959.1|	0.37	99.63	100	26959	27059
Staphylococcus_#_aureus_!_plasmid_{_p18809-P03_}_complete_sequence|gi|410655245|ref|NC_018961.1|	0.369	99.631	100	26968	27068
Staphylococcus_#_aureus_!_plasmid_{_p18809-P04_}_complete_sequence|gi|410655376|ref|NC_018968.1|	0.352	99.648	100	28304	28404
Staphylococcus_#_aureus_!_plasmid_{_p18810-P03_}_complete_sequence|gi|410655288|ref|NC_018963.1|	0.369	99.631	100	26967	27067
[truncated: 106 more rows]

## Sheet: 10k
Organism	Genome_Coverage(%)	Genome_Not_Covered(%)	Genome_Coverage	Genome_Not_Covered	Genome_Size
[truncated: 3,341 more rows]

[truncated: 2 more sheets: 100k, 1m]
